# Supplementary material for: OrbId: Origin-based identification of microRNA targets
Source: PubMed Central journal article supplement — Mob Genet Elements. 2012 Jul 1;2(4):184–92. doi: 10.4161/mge.21617 (PMC3469430; doi:10.4161/mge.21617), 2012-07-01
Supplement: mge-2-184-s01.pdf [file mge-2-184-s01.pdf]

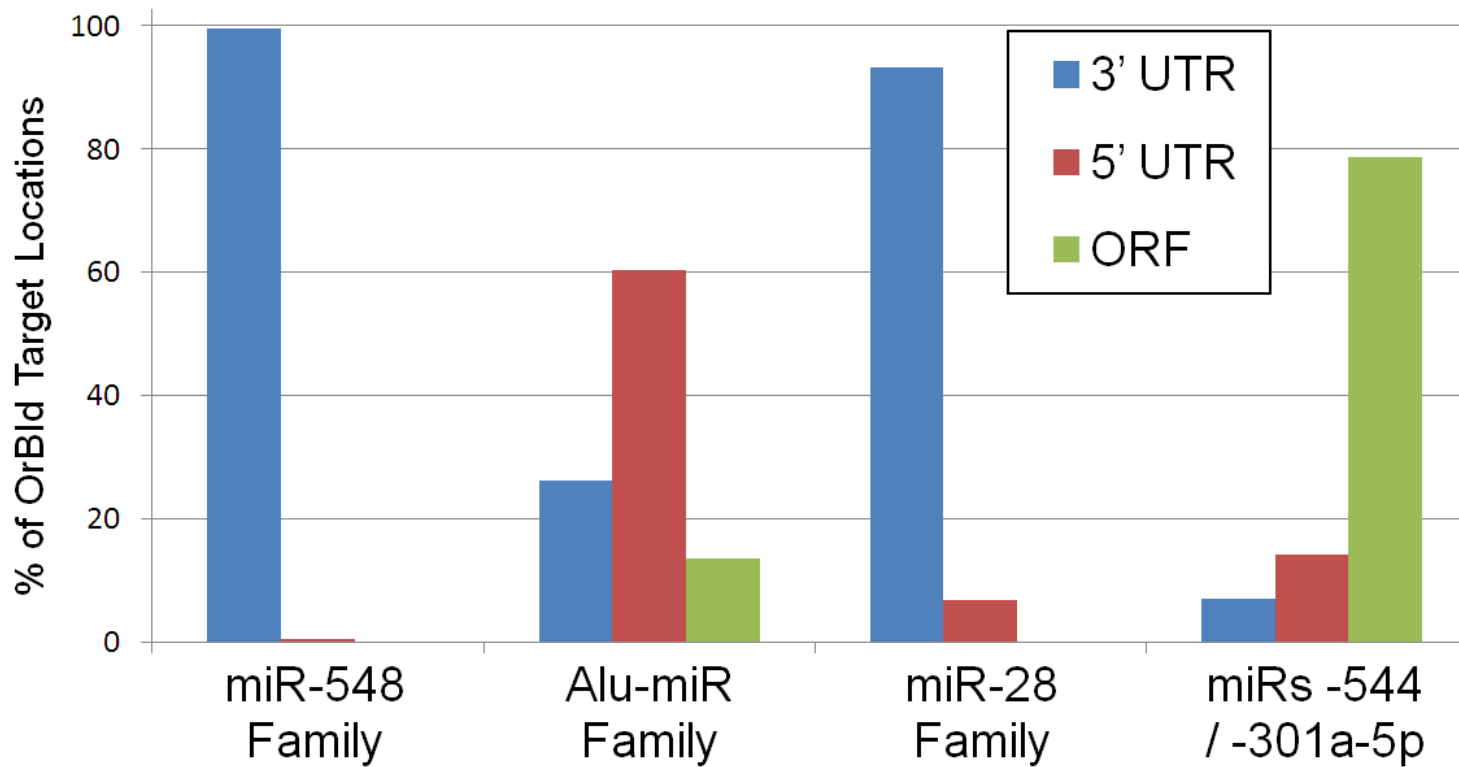

**Supplemental Figure 1.** MiR family mRNA targeting biases. Distributions of miRs -544 and -301a-5p, and miR-28, miR-548, and Alu-miR family target locations within mRNA transcripts as predicted by OrBld.

```

mir28      GTCCTTGCCCTCAAGGAGCTCACAGTCTAT-TGAGT-----TACCTTTCTGACTTTCC-C-ACTAGATTGTGAGCTCCTGGAAGGGCAGGCACT
mir708     GTAACCTGCCCTCAAGGAGCTTACAATCTAGCTGGGGGTAAATGACTTGCACATGAACA-CAACTAGACTGTGAGCTTCTAGAGGGCAGGGACC
mir151a    TTTCCTGCCCTCGAGGAGCTCACAGTCTAG-TATGT-----CTCATCCCCTA-CTAGACTG-AAGCTCCTTGAGGACAGGGATG
          *   * * * * * * * * * * * * * * * * * * * * * * * * * * * * * * * * * * * * * * * * * * * * * * *

```

**Supplemental Figure 2.** Pre-miRs -28, -151 and -708 alignment. ClustalW alignment of pre-miRs -28, -151 and -708. Mature miRs are highlighted in yellow. \*, conserved nucleotide.

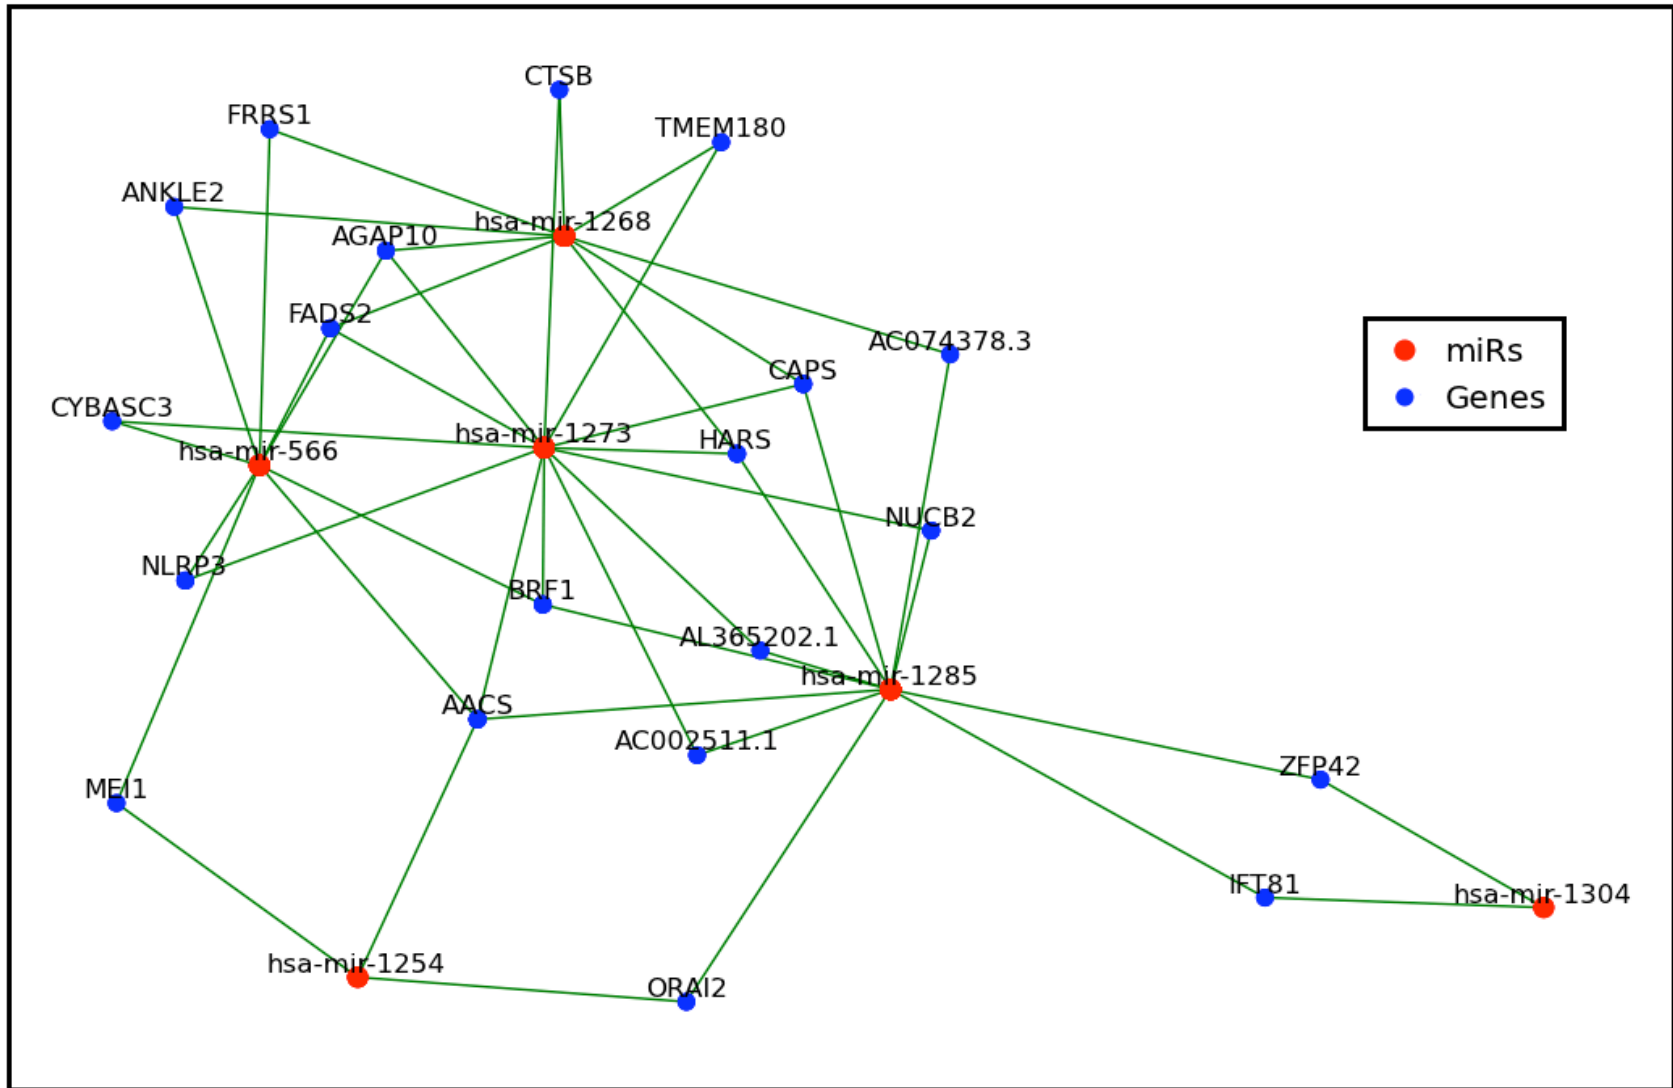

**Supplemental Figure 3.** Orblid Alu family target network. MiRs -1285-5p and -3p have been combined and are shown collectively as were miR-1273s. Only shared targets are depicted. Green lines indicate miR regulation.

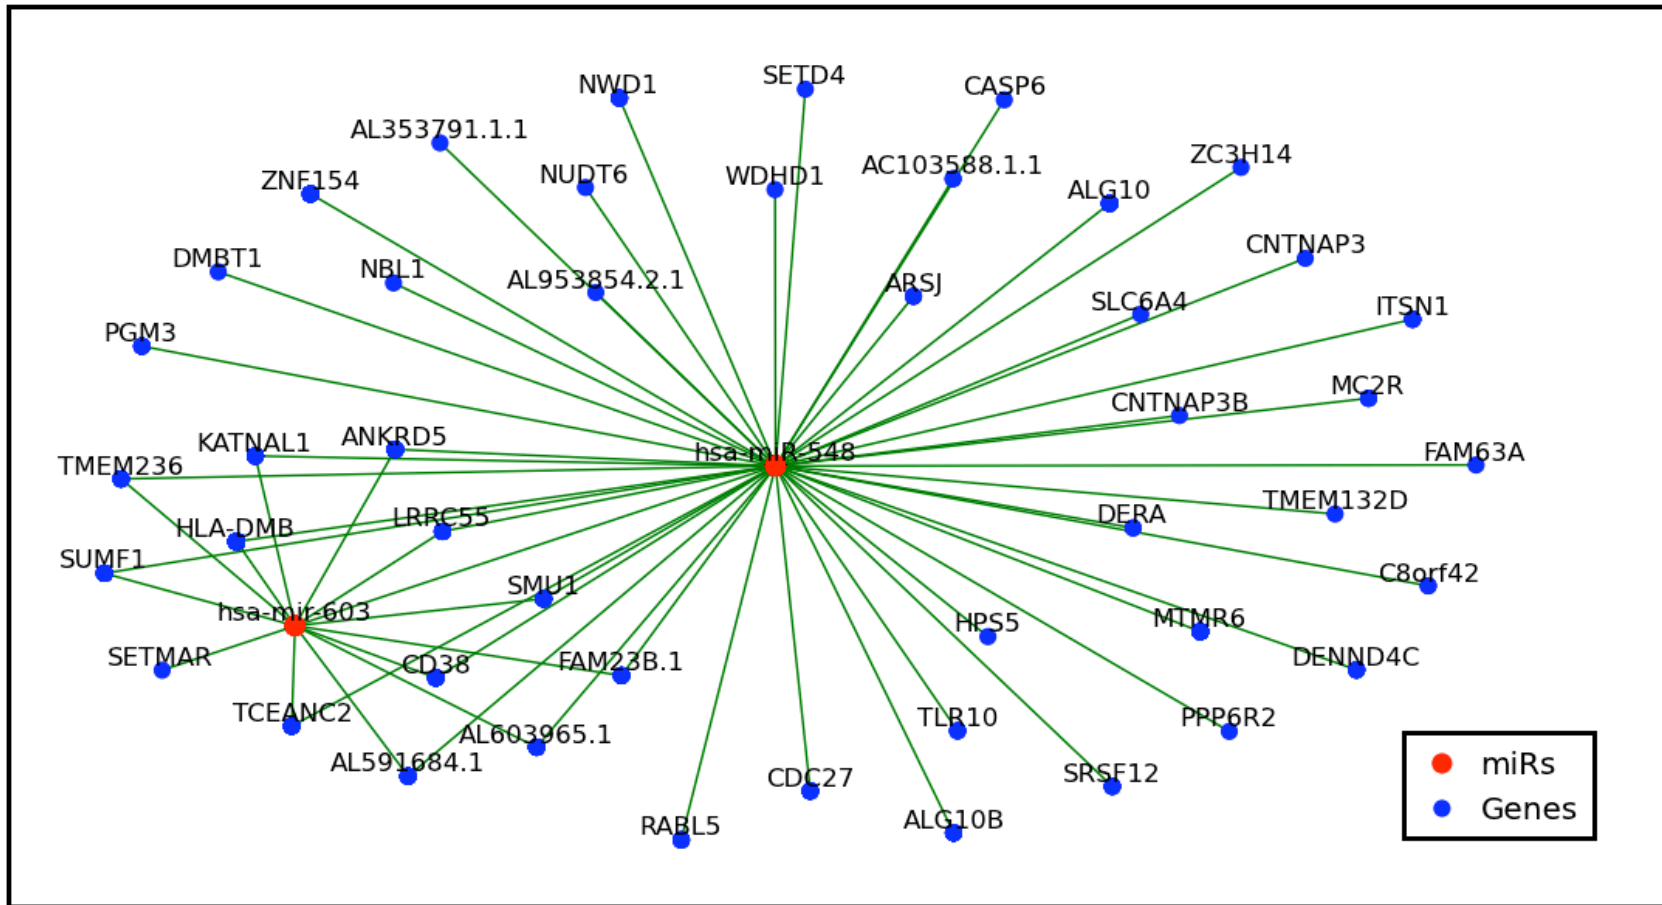

**Supplemental Figure 4.** MiR-548 and miR-603 family target network. Current miR-548 family members are shown collectively. All targets of both the miR-548 family and miR-603 are depicted indicating 13 of 14 miR-603 targets are also targeted by an existing miR-548 family member. Green lines indicate miR regulation.

|                                                |      |
|------------------------------------------------|------|
| AAAAGGGGGTTTTCCCGCTGCTGCTGCTCAAGCTGCTCCAACGTAG | mRNA |
| TTTTCCCGCTGCTGCTGCTCAAGCTGC                    | TE   |
| GGGTTTTCCCGC                                   | miR  |

|                                                |      |
|------------------------------------------------|------|
| AAAAGGGGGTTTTCCCGCTGCTGCTGCTCAAGCTGCTCCAACGTAG | mRNA |
| TTTTCCCGCTGCTGCTGCTCAAGCTGC                    | TE   |
| TTTCCCGCTGCT                                   | miR  |

|                                                |      |
|------------------------------------------------|------|
| AAAAGGGGGTTTTCCCGCTGCTGCTGCTCAAGCTGCTCCAACGTAG | mRNA |
| TTTTCCCGCTGCTGCTGCTCAAGCTGC                    | TE   |
| CAAGCTGCCCGC                                   | miR  |

**Supplemental Figure 5.** Cartoon illustrating three potential scenarios for Orb1d alignment. If a miR and its corresponding TE had overlapping start and stop loci on the same mRNA, it was considered a match.
