# Supplementary material for: OrbId: Origin-based identification of microRNA targets
Source: PubMed Central journal article supplement — Mob Genet Elements. 2012 Jul 1;2(4):184–92. doi: 10.4161/mge.21617 (PMC3469430; doi:10.4161/mge.21617), 2012-07-01
Supplement: mge-2-184-s02.pdf [file mge-2-184-s02.pdf]

**Supplemental Table 1.** Full Orblid prediction set for TE-derived annotations refer to RepBase<sup>42, 43</sup> identifiers except for RF numb both the target mRNA and consensus TE progenitor. “Region” re Gene ID” and “Gene Name” were obtained using the Biomart mi

| miR Name        | Ensembl Gene ID | Gene Name |
|-----------------|-----------------|-----------|
| hsa-mir-1202    | ENSG00000113552 | GNPDA1    |
| hsa-mir-1202    | ENSG00000119927 | GPAM      |
| hsa-mir-1202    | ENSG00000136193 | SCRN1     |
| hsa-mir-1202    | ENSG00000163328 | GPR155    |
| hsa-mir-1202    | ENSG00000165219 | GAPVD1    |
| hsa-mir-1202    | ENSG00000122786 | CALD1     |
| hsa-mir-1202    | ENSG00000106003 | LFNG      |
| hsa-mir-1202    | ENSG00000122786 | CALD1     |
| hsa-mir-1224_3p | ENSG00000196507 | TCEAL3    |
| hsa-mir-1224_3p | ENSG00000198759 | EGFL6     |
| hsa-mir-1224_3p | ENSG00000204071 | TCEAL6    |
| hsa-mir-1224_3p | ENSG00000145321 | GC        |
| hsa-mir-1224_5p | ENSG00000160439 | RDH13     |
| hsa-mir-1224_5p | ENSG00000196465 | MYL6B     |
| hsa-mir-1227    | ENSG00000062485 | CS        |
| hsa-mir-1227    | ENSG00000196387 | ZNF140    |
| hsa-mir-1227    | ENSG00000213694 | S1PR3     |
| hsa-mir-1227    | LRG_101         | RFX5      |
| hsa-mir-1231    | ENSG00000156113 | KCNMA1    |
| hsa-mir-1246    | ENSG00000154175 | ABI3BP    |
| hsa-mir-1246    | ENSG00000198646 | NCOA6     |
| hsa-mir-1246    | ENSG00000197846 | HIST1H2BF |
| hsa-mir-1246    | ENSG00000163818 | LZTFL1    |
| hsa-mir-1246    | ENSG00000184351 | KRTAP19-1 |
| hsa-mir-1246    | ENSG00000198646 | NCOA6     |
| hsa-mir-1249    | ENSG00000143776 | CDC42BPA  |
| hsa-mir-1249    | ENSG00000181234 | TMEM132C  |
| hsa-mir-1254-1  | ENSG00000081760 | AACS      |
| hsa-mir-1254-1  | ENSG00000167077 | MEI1      |

|                    |                 |            |
|--------------------|-----------------|------------|
| hsa-mir-1254-1     | ENSG00000238035 | AC138035.1 |
| hsa-mir-1254-1     | ENSG00000160991 | ORAI2      |
| hsa-mir-1255a      | ENSG00000177311 | ZBTB38     |
| hsa-mir-1255a      | ENSG00000121350 | PYROXD1    |
| hsa-mir-1255b-2_3p | ENSG00000139218 | SCAF11     |
| hsa-mir-1255b-2_3p | ENSG00000221944 | TIGD1      |
| hsa-mir-1255b-2_3p | ENSG00000165732 | DDX21      |
| hsa-mir-1255b-2_3p | ENSG00000168522 | FNTA       |
| hsa-mir-1255b-2_3p | ENSG00000241043 | TIGD1L2    |
| hsa-mir-1256       | ENSG00000139218 | SCAF11     |
| hsa-mir-1256       | ENSG00000177058 | SLC38A9    |
| hsa-mir-1260b      | ENSG00000184384 | MAML2      |
| hsa-mir-1261       | ENSG00000221944 | TIGD1      |
| hsa-mir-1263       | ENSG00000166748 | AGBL1      |
| hsa-mir-1267       | ENSG00000241635 | UGT1A1     |
| hsa-mir-1267       | ENSG00000124092 | CTCFL      |
| hsa-mir-1267       | ENSG00000138459 | SLC35A5    |
| hsa-mir-1267       | ENSG00000153140 | CETN3      |
| hsa-mir-1267       | ENSG00000162769 | FLVCR1     |
| hsa-mir-1267       | ENSG00000151576 | QTRTD1     |
| hsa-mir-1268a      | ENSG00000105519 | CAPS       |
| hsa-mir-1268a      | ENSG00000110987 | BCL7A      |
| hsa-mir-1268a      | ENSG00000110987 | BCL7A      |
| hsa-mir-1268a      | ENSG00000121542 | SEC22A     |
| hsa-mir-1268a      | ENSG00000123358 | NR4A1      |
| hsa-mir-1268a      | ENSG00000132517 | GPR172B    |
| hsa-mir-1268a      | ENSG00000134824 | FADS2      |
| hsa-mir-1268a      | ENSG00000138111 | TMEM180    |
| hsa-mir-1268a      | ENSG00000156869 | FRRS1      |
| hsa-mir-1268a      | ENSG00000164733 | CTSB       |
| hsa-mir-1268a      | ENSG00000166526 | ZNF3       |
| hsa-mir-1268a      | ENSG00000170445 | HARS       |
| hsa-mir-1268a      | ENSG00000171462 | DLK2       |
| hsa-mir-1268a      | ENSG00000176020 | AMIGO3     |
| hsa-mir-1268a      | ENSG00000176783 | RUFY1      |
| hsa-mir-1268a      | ENSG00000176915 | ANKLE2     |

|                 |                 |            |
|-----------------|-----------------|------------|
| hsa-mir-1268a   | ENSG00000176915 | ANKLE2     |
| hsa-mir-1268a   | ENSG00000204172 | AGAP10     |
| hsa-mir-1268a   | ENSG00000110497 | AMBRA1     |
| hsa-mir-1268a   | ENSG00000257983 | CR388372.6 |
| hsa-mir-1268a   | ENSG00000258307 | BX000360.1 |
| hsa-mir-1268a   | ENSG00000258293 | CR759942.1 |
| hsa-mir-1268a   | ENSG00000257448 | AC074378.3 |
| hsa-mir-1268a   | ENSG00000258176 | BX119924.2 |
| hsa-mir-1268a   | ENSG00000158859 | ADAMTS4    |
| hsa-mir-1268a   | ENSG00000102158 | MAGT1      |
| hsa-mir-1268a   | ENSG00000076053 | RBM7       |
| hsa-mir-1268a   | ENSG00000178665 | ZNF713     |
| hsa-mir-1268a   | ENSG00000240694 | PNMA2      |
| hsa-mir-1268a   | ENSG00000162419 | GMEB1      |
| hsa-mir-1269a   | ENSG00000197891 | SLC22A12   |
| hsa-mir-1269a   | ENSG00000171914 | TLN2       |
| hsa-mir-1271_3p | ENSG00000108950 | FAM20A     |
| hsa-mir-1271_3p | ENSG00000135632 | SMYD5      |
| hsa-mir-1271_3p | ENSG00000149100 | EIF3M      |
| hsa-mir-1271_3p | ENSG00000134046 | MBD2       |
| hsa-mir-1271_3p | ENSG00000101290 | CDS2       |
| hsa-mir-1271_3p | ENSG00000112242 | E2F3       |
| hsa-mir-1271_3p | ENSG00000116604 | MEF2D      |
| hsa-mir-1271_3p | ENSG00000135387 | CAPRIN1    |
| hsa-mir-1271_3p | ENSG00000229684 | TUBB       |
| hsa-mir-1272    | ENSG00000110768 | GTF2H1     |
| hsa-mir-1272    | ENSG00000186635 | ARAP1      |
| hsa-mir-1273a   | ENSG00000026103 | FAS        |
| hsa-mir-1273a   | ENSG00000076555 | ACACB      |
| hsa-mir-1273a   | ENSG00000081760 | AACS       |
| hsa-mir-1273a   | ENSG00000081760 | AACS       |
| hsa-mir-1273a   | ENSG00000105519 | CAPS       |
| hsa-mir-1273a   | ENSG00000110801 | PSMD9      |
| hsa-mir-1273a   | ENSG00000115641 | FHL2       |
| hsa-mir-1273a   | ENSG00000134824 | FADS2      |
| hsa-mir-1273a   | ENSG00000143373 | ZNF687     |

|               |                 |                 |
|---------------|-----------------|-----------------|
| hsa-mir-1273a | ENSG00000159788 | RGS12           |
| hsa-mir-1273a | ENSG00000162144 | CYBASC3         |
| hsa-mir-1273a | ENSG00000162711 | NLRP3           |
| hsa-mir-1273a | ENSG00000164733 | CTSB            |
| hsa-mir-1273a | ENSG00000167904 | TMEM68          |
| hsa-mir-1273a | ENSG00000170445 | HARS            |
| hsa-mir-1273a | ENSG00000185324 | CDK10           |
| hsa-mir-1273a | ENSG00000185344 | ATP6V0A2        |
| hsa-mir-1273a | ENSG00000185344 | ATP6V0A2        |
| hsa-mir-1273a | ENSG00000185917 | SETD4           |
| hsa-mir-1273a | ENSG00000198393 | ZNF26           |
| hsa-mir-1273a | ENSG00000198646 | NCOA6           |
| hsa-mir-1273a | ENSG00000204410 | MSH5            |
| hsa-mir-1273a | ENSG00000204531 | POU5F1          |
| hsa-mir-1273a | ENSG00000205786 | AC002511.1      |
| hsa-mir-1273a | ENSG00000242028 | C15orf63        |
| hsa-mir-1273a | ENSG00000203286 | AL365202.1      |
| hsa-mir-1273a | ENSG00000203443 | AC092964.1      |
| hsa-mir-1273a | ENSG00000161929 | SCIMP           |
| hsa-mir-1273a | ENSG00000213993 | AC092067.1      |
| hsa-mir-1273a | ENSG00000181264 | TMEM136         |
| hsa-mir-1273a | ENSG00000168243 | GNG4            |
| hsa-mir-1273a | ENSG00000077254 | USP33           |
| hsa-mir-1273a | ENSG00000049883 | PTCD2           |
| hsa-mir-1273a | ENSG00000189298 | ZKSCAN3         |
| hsa-mir-1273a | ENSG00000258311 | RP11-644F5.10.1 |
| hsa-mir-1273a | ENSG00000166822 | TMEM170A        |
| hsa-mir-1273a | ENSG00000188522 | FAM83G          |
| hsa-mir-1273a | ENSG00000152700 | SAR1B           |
| hsa-mir-1273a | ENSG00000197343 | ZNF655          |
| hsa-mir-1273a | ENSG00000152700 | SAR1B           |
| hsa-mir-1273a | ENSG00000108825 | AARSD1          |
| hsa-mir-1273a | ENSG00000169914 | OTUD3           |
| hsa-mir-1273a | ENSG00000196236 | XPNPEP3         |
| hsa-mir-1273c | ENSG00000143373 | ZNF687          |
| hsa-mir-1273d | ENSG00000063978 | RNF4            |

|                 |                 |              |
|-----------------|-----------------|--------------|
| hsa-mir-1273d   | ENSG00000070081 | NUCB2        |
| hsa-mir-1273d   | ENSG00000081760 | AACS         |
| hsa-mir-1273d   | ENSG00000093000 | NUP50        |
| hsa-mir-1273d   | ENSG00000102384 | CENPI        |
| hsa-mir-1273d   | ENSG00000110801 | PSMD9        |
| hsa-mir-1273d   | ENSG00000138111 | TMEM180      |
| hsa-mir-1273d   | ENSG00000143373 | ZNF687       |
| hsa-mir-1273d   | ENSG00000151320 | AKAP6        |
| hsa-mir-1273d   | ENSG00000180902 | D2HGDH       |
| hsa-mir-1273d   | ENSG00000185024 | BRF1         |
| hsa-mir-1273d   | ENSG00000185024 | BRF1         |
| hsa-mir-1273d   | ENSG00000185024 | BRF1         |
| hsa-mir-1273d   | ENSG00000198646 | NCOA6        |
| hsa-mir-1273d   | ENSG00000204172 | AGAP10       |
| hsa-mir-1273d   | ENSG00000213903 | LTB4R        |
| hsa-mir-1273d   | ENSG00000214248 | AC010336.2   |
| hsa-mir-1273d   | ENSG00000233538 | AC017104.2.1 |
| hsa-mir-1273d   | ENSG00000177324 | BEND2        |
| hsa-mir-1273d   | ENSG00000175782 | SLC35E3      |
| hsa-mir-1273d   | ENSG00000077254 | USP33        |
| hsa-mir-1273d   | ENSG00000180758 | GPR157       |
| hsa-mir-1273d   | ENSG00000196459 | TRAPPC2      |
| hsa-mir-1273d   | ENSG00000138185 | ENTPD1       |
| hsa-mir-1273d   | ENSG00000137413 | TAF8         |
| hsa-mir-1273d   | ENSG00000198252 | STYX         |
| hsa-mir-1273d   | ENSG00000134042 | MRO          |
| hsa-mir-1273d   | ENSG00000167984 | NLRC3        |
| hsa-mir-1273d   | ENSG00000017373 | SRCIN1       |
| hsa-mir-1273d   | ENSG00000132570 | PCBD2        |
| hsa-mir-1273d   | ENSG00000152939 | MARVELD2     |
| hsa-mir-1277_3p | ENSG00000113448 | PDE4D        |
| hsa-mir-1277_3p | ENSG00000215066 | C9orf38      |
| hsa-mir-1277_3p | ENSG00000236112 | AC006035.2   |
| hsa-mir-1277_3p | ENSG00000085185 | BCORL1       |
| hsa-mir-1277_3p | ENSG00000123124 | WWP1         |
| hsa-mir-1277_5p | ENSG00000070159 | PTPN3        |

|                 |                 |            |
|-----------------|-----------------|------------|
| hsa-mir-1277_5p | ENSG00000113448 | PDE4D      |
| hsa-mir-1277_5p | ENSG00000115963 | RND3       |
| hsa-mir-1277_5p | ENSG00000115963 | RND3       |
| hsa-mir-1277_5p | ENSG00000183484 | GPR132     |
| hsa-mir-1277_5p | ENSG00000196935 | SRGAP1     |
| hsa-mir-1277_5p | ENSG00000196935 | SRGAP1     |
| hsa-mir-1277_5p | ENSG00000213002 | AC120194.1 |
| hsa-mir-1277_5p | ENSG00000213002 | AC120194.1 |
| hsa-mir-1277_5p | ENSG00000213002 | AC120194.1 |
| hsa-mir-1277_5p | ENSG00000215066 | C9orf38    |
| hsa-mir-1277_5p | ENSG00000106125 | FAM188B    |
| hsa-mir-1277_5p | ENSG00000085185 | BCORL1     |
| hsa-mir-1277_5p | ENSG00000112276 | BVES       |
| hsa-mir-1277_5p | ENSG00000157837 | SPPL3.1    |
| hsa-mir-1277_5p | ENSG00000179820 | MYADM      |
| hsa-mir-1277_5p | ENSG00000173926 | MARCH3     |
| hsa-mir-1277_5p | ENSG00000100346 | CACNA1I    |
| hsa-mir-1277_5p | ENSG00000100346 | CACNA1I    |
| hsa-mir-1277_5p | ENSG00000132846 | ZBED3      |
| hsa-mir-1277_5p | ENSG00000112276 | BVES       |
| hsa-mir-1277_5p | ENSG00000163605 | PPP4R2     |
| hsa-mir-1277_5p | ENSG00000168916 | ZNF608     |
| hsa-mir-1277_5p | ENSG00000144644 | GADL1      |
| hsa-mir-1277_5p | ENSG00000109381 | ELF2       |
| hsa-mir-1277_5p | ENSG00000137504 | CREBZF     |
| hsa-mir-1277_5p | ENSG00000139800 | ZIC5       |
| hsa-mir-1277_5p | ENSG00000123411 | IKZF4      |
| hsa-mir-1277_5p | ENSG00000144644 | GADL1      |
| hsa-mir-1277_5p | ENSG00000109381 | ELF2       |
| hsa-mir-1277_5p | ENSG00000139800 | ZIC5       |
| hsa-mir-1277_5p | ENSG00000168779 | SHOX2      |
| hsa-mir-1277_5p | ENSG00000163291 | PAQR3      |
| hsa-mir-1277_5p | ENSG00000138756 | BMP2K      |
| hsa-mir-1277_5p | ENSG00000067167 | TRAM1      |
| hsa-mir-1277_5p | ENSG00000198932 | GPRASP1    |
| hsa-mir-1277_5p | ENSG00000168779 | SHOX2      |

|                 |                 |          |
|-----------------|-----------------|----------|
| hsa-mir-1277_5p | ENSG00000067167 | TRAM1    |
| hsa-mir-1277_5p | ENSG00000163291 | PAQR3    |
| hsa-mir-1277_5p | ENSG00000179820 | MYADM    |
| hsa-mir-1277_5p | ENSG00000138756 | BMP2K    |
| hsa-mir-1277_5p | ENSG00000067208 | EVI5     |
| hsa-mir-1277_5p | ENSG00000067208 | EVI5     |
| hsa-mir-1277_5p | ENSG00000174899 | C3orf55  |
| hsa-mir-1277_5p | ENSG00000124942 | AHNAK    |
| hsa-mir-1277_5p | ENSG00000163625 | WDFY3    |
| hsa-mir-1277_5p | ENSG00000118260 | CREB1    |
| hsa-mir-1277_5p | ENSG00000230055 | CISD3    |
| hsa-mir-1277_5p | ENSG00000174780 | SRP72    |
| hsa-mir-1277_5p | ENSG00000132846 | ZBED3    |
| hsa-mir-1277_5p | ENSG00000079387 | SENP1    |
| hsa-mir-1277_5p | ENSG00000151338 | MIPOL1   |
| hsa-mir-1277_5p | ENSG00000178662 | CSRNP3   |
| hsa-mir-1277_5p | ENSG00000096093 | EFHC1    |
| hsa-mir-1277_5p | ENSG00000139625 | MAP3K12  |
| hsa-mir-1277_5p | ENSG00000011454 | RABGAP1  |
| hsa-mir-1277_5p | ENSG00000169836 | TACR3    |
| hsa-mir-1277_5p | ENSG00000168769 | TET2     |
| hsa-mir-1277_5p | ENSG00000174780 | SRP72    |
| hsa-mir-1277_5p | ENSG00000144635 | DYNC1LI1 |
| hsa-mir-1277_5p | ENSG00000185924 | RTN4RL1  |
| hsa-mir-1277_5p | ENSG00000158467 | AHCYL2   |
| hsa-mir-1277_5p | ENSG00000175785 | PRIMA1   |
| hsa-mir-1277_5p | ENSG00000171843 | MLLT3    |
| hsa-mir-1277_5p | ENSG00000106459 | NRF1     |
| hsa-mir-1277_5p | ENSG00000137504 | CREBZF   |
| hsa-mir-1277_5p | ENSG00000156103 | MMP16    |
| hsa-mir-1277_5p | ENSG00000076770 | MBNL3    |
| hsa-mir-1277_5p | ENSG00000015153 | YAF2     |
| hsa-mir-1277_5p | ENSG00000132694 | ARHGEF11 |
| hsa-mir-1277_5p | ENSG00000153936 | HS2ST1   |
| hsa-mir-1277_5p | ENSG00000132694 | ARHGEF11 |
| hsa-mir-1277_5p | ENSG00000096093 | EFHC1    |

|                   |                 |          |
|-------------------|-----------------|----------|
| hsa-mir-1277_5p   | ENSG00000096093 | EFHC1    |
| hsa-mir-1277_5p   | ENSG00000139800 | ZIC5     |
| hsa-mir-1277_5p   | ENSG00000196323 | ZBTB44   |
| hsa-mir-1277_5p   | ENSG00000154114 | TBCEL    |
| hsa-mir-1277_5p   | ENSG00000123411 | IKZF4    |
| hsa-mir-1277_5p   | ENSG00000176542 | KIAA2018 |
| hsa-mir-1277_5p   | ENSG00000144644 | GADL1    |
| hsa-mir-1277_5p   | ENSG00000164086 | DUSP7    |
| hsa-mir-1277_5p   | ENSG00000079387 | SENP1    |
| hsa-mir-1277_5p   | ENSG00000183117 | CSMD1    |
| hsa-mir-1277_5p   | ENSG00000109381 | ELF2     |
| hsa-mir-1277_5p   | ENSG00000137504 | CREBZF   |
| hsa-mir-1277_5p   | ENSG00000109381 | ELF2     |
| hsa-mir-1277_5p   | ENSG00000198932 | GPRASP1  |
| hsa-mir-1277_5p   | ENSG00000117523 | PRRC2C   |
| hsa-mir-1277_5p   | ENSG00000174780 | SRP72    |
| hsa-mir-1277_5p   | ENSG00000100346 | CACNA1I  |
| hsa-mir-1277_5p   | ENSG00000132846 | ZBED3    |
| hsa-mir-1277_5p   | ENSG00000106459 | NRF1     |
| hsa-mir-1277_5p   | ENSG00000163605 | PPP4R2   |
| hsa-mir-1277_5p   | ENSG00000079387 | SENP1    |
| hsa-mir-1277_5p   | ENSG00000205730 | ITPRIPL2 |
| hsa-mir-1277_5p   | ENSG00000140538 | NTRK3    |
| hsa-mir-1277_5p   | ENSG00000100346 | CACNA1I  |
| hsa-mir-1277_5p   | ENSG00000174780 | SRP72    |
| hsa-mir-1277_5p   | ENSG00000205730 | ITPRIPL2 |
| hsa-mir-1285-1_3p | ENSG00000131370 | SH3BP5   |
| hsa-mir-1285-1_3p | ENSG00000185024 | BRF1     |
| hsa-mir-1285-1_3p | ENSG00000070081 | NUCB2    |
| hsa-mir-1285-1_3p | ENSG00000070081 | NUCB2    |
| hsa-mir-1285-1_3p | ENSG00000100600 | LGMN     |
| hsa-mir-1285-1_3p | ENSG00000100600 | LGMN     |
| hsa-mir-1285-1_3p | ENSG00000105519 | CAPS     |
| hsa-mir-1285-1_3p | ENSG00000111725 | PRKAB1   |
| hsa-mir-1285-1_3p | ENSG00000118096 | IFT46    |
| hsa-mir-1285-1_3p | ENSG00000138075 | ABCG5    |



|                   |                 |                 |
|-------------------|-----------------|-----------------|
| hsa-mir-1285-1_3p | ENSG00000162194 | C11orf48        |
| hsa-mir-1285-1_3p | ENSG00000170445 | HARS            |
| hsa-mir-1285-1_3p | ENSG00000182326 | C1S             |
| hsa-mir-1285-1_3p | ENSG00000182326 | C1S             |
| hsa-mir-1285-1_3p | ENSG00000188368 | PRR19           |
| hsa-mir-1285-1_3p | ENSG00000196652 | ZKSCAN5         |
| hsa-mir-1285-1_3p | ENSG00000205036 | C16orf85        |
| hsa-mir-1285-1_3p | ENSG00000205786 | AC002511.1      |
| hsa-mir-1285-1_3p | ENSG00000228006 | AC004017.1      |
| hsa-mir-1285-1_3p | ENSG00000239857 | GET4            |
| hsa-mir-1285-1_3p | ENSG00000164867 | NOS3            |
| hsa-mir-1285-1_3p | ENSG00000203392 | AC105020.1      |
| hsa-mir-1285-1_3p | ENSG00000119725 | ZNF410          |
| hsa-mir-1285-1_3p | ENSG00000087884 | C11orf67        |
| hsa-mir-1285-1_3p | ENSG00000138075 | ABCG5           |
| hsa-mir-1285-1_3p | ENSG00000114904 | NEK4            |
| hsa-mir-1285-1_3p | ENSG00000163915 | C3orf65         |
| hsa-mir-1285-1_3p | ENSG00000132677 | RHBG            |
| hsa-mir-1285-1_3p | ENSG00000184900 | SUMO3           |
| hsa-mir-1285-1_3p | ENSG00000214871 | AC005082.1      |
| hsa-mir-1285-1_3p | ENSG00000257448 | AC074378.3      |
| hsa-mir-1285-1_3p | ENSG00000122970 | IFT81           |
| hsa-mir-1285-1_3p | ENSG00000257561 | AC138688.4      |
| hsa-mir-1285-1_3p | ENSG00000161265 | U2AF1L4         |
| hsa-mir-1285-1_3p | ENSG00000203286 | AL365202.1      |
| hsa-mir-1285-1_3p | ENSG00000163322 | FAM175A         |
| hsa-mir-1285-1_3p | ENSG00000167555 | ZNF528          |
| hsa-mir-1285-1_3p | ENSG00000163945 | KIAA1530        |
| hsa-mir-1285-1_3p | ENSG00000170959 | DCDC5           |
| hsa-mir-1285-1_3p | ENSG00000160991 | ORAI2           |
| hsa-mir-1285-1_3p | ENSG00000188000 | OR7D2           |
| hsa-mir-1285-1_3p | ENSG00000144218 | AFF3            |
| hsa-mir-1285-1_3p | ENSG00000179240 | RP11-111M22.2.1 |
| hsa-mir-1285-1_3p | ENSG00000186431 | FCAR            |
| hsa-mir-1285-1_5p | ENSG00000070601 | FRMPD1          |
| hsa-mir-1285-1_5p | ENSG00000081760 | AACS            |

|                   |                 |          |
|-------------------|-----------------|----------|
| hsa-mir-1285-1_5p | ENSG00000081760 | AACS     |
| hsa-mir-1285-1_5p | ENSG00000092094 | OSGEP    |
| hsa-mir-1285-1_5p | ENSG00000133961 | NUMB     |
| hsa-mir-1285-1_5p | ENSG00000137135 | C9orf100 |
| hsa-mir-1285-1_5p | ENSG00000142405 | NLRP12   |
| hsa-mir-1285-1_5p | ENSG00000149485 | FADS1    |
| hsa-mir-1285-1_5p | ENSG00000169155 | ZBTB43   |
| hsa-mir-1285-1_5p | ENSG00000177084 | POLE     |
| hsa-mir-1285-1_5p | ENSG00000182718 | ANXA2    |
| hsa-mir-1285-1_5p | ENSG00000184575 | XPOT     |
| hsa-mir-1285-1_5p | ENSG00000205036 | C16orf85 |
| hsa-mir-1285-1_5p | ENSG00000128512 | DOCK4    |
| hsa-mir-1285-1_5p | ENSG00000125741 | OPA3     |
| hsa-mir-1285-1_5p | ENSG00000137135 | C9orf100 |
| hsa-mir-1285-1_5p | ENSG00000105523 | FAM83E   |
| hsa-mir-1285-1_5p | ENSG00000093144 | ECHDC1   |
| hsa-mir-1285-1_5p | ENSG00000172116 | CD8B     |
| hsa-mir-1285-1_5p | ENSG00000169239 | CA5B     |
| hsa-mir-1285-1_5p | ENSG00000179059 | ZFP42    |
| hsa-mir-1285-1_5p | ENSG00000186684 | CYP27C1  |
| hsa-mir-1285-2_3p | ENSG00000004838 | ZMYND10  |
| hsa-mir-1285-2_3p | ENSG00000070081 | NUCB2    |
| hsa-mir-1285-2_3p | ENSG00000105519 | CAPS     |
| hsa-mir-1285-2_3p | ENSG00000163050 | ADCK3    |
| hsa-mir-1285-2_3p | ENSG00000175581 | MRPL48   |
| hsa-mir-1285-2_3p | ENSG00000185024 | BRF1     |
| hsa-mir-1285-2_3p | ENSG00000188368 | PRR19    |
| hsa-mir-1285-2_3p | ENSG00000196652 | ZKSCAN5  |
| hsa-mir-1285-2_3p | ENSG00000168003 | SLC3A2   |
| hsa-mir-1285-2_3p | ENSG00000162461 | SLC25A34 |
| hsa-mir-1285-2_3p | ENSG00000113262 | GRM6     |
| hsa-mir-1285-2_3p | ENSG00000170006 | TMEM154  |
| hsa-mir-1285-2_3p | ENSG00000103319 | EEF2K    |
| hsa-mir-1289-1    | ENSG00000164733 | CTSB     |
| hsa-mir-1289-2    | ENSG00000236287 | ZBED5    |
| hsa-mir-1289-2    | ENSG00000135931 | ARMC9    |

|                 |                 |           |
|-----------------|-----------------|-----------|
| hsa-mir-1289-2  | ENSG00000164251 | F2RL1     |
| hsa-mir-1289-2  | ENSG00000001461 | NIPAL3    |
| hsa-mir-1289-2  | ENSG00000144644 | GADL1     |
| hsa-mir-1289-2  | ENSG00000173681 | CXorf23   |
| hsa-mir-1289-2  | ENSG00000177000 | MTHFR     |
| hsa-mir-1291    | ENSG00000179532 | DNHD1     |
| hsa-mir-1291    | ENSG00000164068 | RNF123    |
| hsa-mir-1299    | ENSG00000004948 | CALCR     |
| hsa-mir-1299    | ENSG00000121073 | SLC35B1   |
| hsa-mir-1302-10 | ENSG00000173889 | PHC3      |
| hsa-mir-1303    | ENSG00000081760 | AACS      |
| hsa-mir-1303    | ENSG00000169155 | ZBTB43    |
| hsa-mir-1303    | ENSG00000111271 | ACAD10    |
| hsa-mir-1303    | ENSG00000076944 | STXBP2    |
| hsa-mir-1303    | ENSG00000167216 | KATNAL2   |
| hsa-mir-1303    | ENSG00000090470 | PDCD7     |
| hsa-mir-1303    | ENSG00000167332 | OR51E2    |
| hsa-mir-1303    | ENSG00000101695 | RNF125    |
| hsa-mir-1303    | ENSG00000144559 | TAMM41    |
| hsa-mir-1303    | ENSG00000144815 | FAM55C    |
| hsa-mir-1303    | ENSG00000174428 | GTF2IRD2B |
| hsa-mir-1303    | ENSG00000196275 | GTF2IRD2  |
| hsa-mir-1303    | ENSG00000160993 | ALKBH4    |
| hsa-mir-1304_3p | ENSG00000122970 | IFT81     |
| hsa-mir-1304_3p | ENSG00000160049 | DFFA      |
| hsa-mir-1304_3p | ENSG00000179059 | ZFP42     |
| hsa-mir-1304_3p | ENSG00000182919 | C11orf54  |
| hsa-mir-1304_3p | ENSG00000134398 | ERN2      |
| hsa-mir-1304_3p | ENSG00000186001 | LRCH3     |
| hsa-mir-1304_5p | ENSG00000109685 | WHSC1     |
| hsa-mir-1304_5p | ENSG00000111670 | GNPTAB    |
| hsa-mir-1304_5p | ENSG00000183888 | C1orf64   |
| hsa-mir-1304_5p | ENSG00000162961 | DPY30     |
| hsa-mir-1321    | ENSG00000135052 | GOLM1     |
| hsa-mir-1321    | ENSG00000183977 | PP2D1     |
| hsa-mir-1321    | ENSG00000131379 | C3orf20   |

|                 |                 |         |
|-----------------|-----------------|---------|
| hsa-mir-1321    | ENSG00000094916 | CBX5    |
| hsa-mir-151a_3p | ENSG00000221986 | MYBPHL  |
| hsa-mir-151a_5p | ENSG00000164136 | IL15    |
| hsa-mir-151a_5p | ENSG00000112139 | MDGA1   |
| hsa-mir-151a_5p | ENSG00000117598 | LPPR5.1 |
| hsa-mir-151a_5p | ENSG00000123472 | ATPAF1  |
| hsa-mir-151a_5p | ENSG00000108309 | RUNDC3A |
| hsa-mir-151a_5p | ENSG00000106608 | URGCP   |
| hsa-mir-151a_5p | ENSG00000134046 | MBD2    |
| hsa-mir-151a_5p | ENSG00000102921 | N4BP1   |
| hsa-mir-151a_5p | ENSG00000197930 | ERO1L   |
| hsa-mir-151a_5p | ENSG00000152578 | GRIA4   |
| hsa-mir-151a_5p | ENSG00000052841 | TTC17   |
| hsa-mir-151a_5p | ENSG00000124466 | LYPD3   |
| hsa-mir-151a_5p | ENSG00000169016 | E2F6    |
| hsa-mir-151a_5p | ENSG00000135999 | EPC2    |
| hsa-mir-16-1_3p | ENSG00000076067 | RBMS2   |
| hsa-mir-16-1_3p | ENSG00000132874 | SLC14A2 |
| hsa-mir-16-1_3p | ENSG00000164136 | IL15    |
| hsa-mir-16-1_3p | ENSG00000118307 | CASC1   |
| hsa-mir-16-1_3p | ENSG00000139915 | MDGA2   |
| hsa-mir-16-1_3p | ENSG00000118307 | CASC1   |
| hsa-mir-1913    | ENSG00000177000 | MTHFR   |
| hsa-mir-1913    | ENSG00000183496 | MEX3B   |
| hsa-mir-1915_3p | ENSG00000063978 | RNF4    |
| hsa-mir-1915_3p | ENSG00000101190 | TCFL5   |
| hsa-mir-1915_3p | ENSG00000146063 | TRIM41  |
| hsa-mir-1915_3p | ENSG00000184557 | SOCS3   |
| hsa-mir-1915_3p | LRG_226         | TBX1    |
| hsa-mir-1915_5p | ENSG00000100031 | GGT1    |
| hsa-mir-1915_5p | ENSG00000106336 | FBXO24  |
| hsa-mir-1915_5p | ENSG00000119242 | CCDC92  |
| hsa-mir-1915_5p | ENSG00000133475 | GGT2    |
| hsa-mir-1915_5p | ENSG00000139517 | LNX2    |
| hsa-mir-1972-1  | ENSG00000081760 | AACS    |
| hsa-mir-1972-1  | ENSG00000081760 | AACS    |

|                |                 |                 |
|----------------|-----------------|-----------------|
| hsa-mir-1972-1 | ENSG00000089060 | SLC24A6         |
| hsa-mir-1972-1 | ENSG00000104408 | EIF3E           |
| hsa-mir-1972-1 | ENSG00000105221 | AKT2            |
| hsa-mir-1972-1 | ENSG00000117640 | FAM54B          |
| hsa-mir-1972-1 | ENSG00000130640 | TUBGCP2         |
| hsa-mir-1972-1 | ENSG00000131374 | TBC1D5          |
| hsa-mir-1972-1 | ENSG00000132517 | GPR172B         |
| hsa-mir-1972-1 | ENSG00000140104 | C14orf79        |
| hsa-mir-1972-1 | ENSG00000144619 | CNTN4           |
| hsa-mir-1972-1 | ENSG00000162241 | SLC25A45        |
| hsa-mir-1972-1 | ENSG00000162711 | NLRP3           |
| hsa-mir-1972-1 | ENSG00000165209 | STRBP           |
| hsa-mir-1972-1 | ENSG00000166448 | TMEM130         |
| hsa-mir-1972-1 | ENSG00000167986 | DDB1            |
| hsa-mir-1972-1 | ENSG00000170445 | HARS            |
| hsa-mir-1972-1 | ENSG00000174233 | ADCY6           |
| hsa-mir-1972-1 | ENSG00000176681 | LRRC37A         |
| hsa-mir-1972-1 | ENSG00000180902 | D2HGDH          |
| hsa-mir-1972-1 | ENSG00000185024 | BRF1            |
| hsa-mir-1972-1 | ENSG00000185324 | CDK10           |
| hsa-mir-1972-1 | ENSG00000186318 | BACE1           |
| hsa-mir-1972-1 | ENSG00000188368 | PRR19           |
| hsa-mir-1972-1 | ENSG00000197859 | ADAMTSL2        |
| hsa-mir-1972-1 | ENSG00000198646 | NCOA6           |
| hsa-mir-1972-1 | ENSG00000204172 | AGAP10          |
| hsa-mir-1972-1 | ENSG00000204410 | MSH5            |
| hsa-mir-1972-1 | ENSG00000204628 | GNB2L1          |
| hsa-mir-1972-1 | ENSG00000213599 | SULT1A3         |
| hsa-mir-1972-1 | ENSG00000213648 | SULT1A4         |
| hsa-mir-1972-1 | ENSG00000235569 | MSH5            |
| hsa-mir-1972-1 | ENSG00000254081 | CTD-3025N20.2.1 |
| hsa-mir-1972-1 | ENSG00000258947 | RP11-566K11.2.1 |
| hsa-mir-1972-1 | ENSG00000258947 | RP11-566K11.2.1 |

|                |                 |            |
|----------------|-----------------|------------|
| hsa-mir-1972-1 | ENSG00000257409 | CR788282.2 |
| hsa-mir-1972-1 | ENSG00000257459 | CR388382.1 |
| hsa-mir-1972-1 | ENSG00000166575 | TMEM135    |
| hsa-mir-1972-1 | ENSG00000162946 | DISC1      |
| hsa-mir-1972-1 | ENSG00000179912 | R3HDM2     |
| hsa-mir-1972-1 | ENSG00000130985 | UBA1       |
| hsa-mir-1972-1 | ENSG00000212670 | AL161915.1 |
| hsa-mir-1972-1 | ENSG00000163110 | PDLIM5     |
| hsa-mir-1972-1 | ENSG00000203286 | AL365202.1 |
| hsa-mir-1972-1 | ENSG00000257349 | AL844220.2 |
| hsa-mir-1972-1 | ENSG00000126562 | WNK4       |
| hsa-mir-1972-1 | ENSG00000196917 | HCAR1      |
| hsa-mir-1972-1 | ENSG00000188000 | OR7D2      |
| hsa-mir-1972-1 | ENSG00000170088 | TMEM192    |
| hsa-mir-1972-1 | ENSG00000103313 | MEFV       |
| hsa-mir-1972-1 | ENSG00000175898 | S1PR2      |
| hsa-mir-1972-1 | ENSG00000162408 | NOL9       |
| hsa-mir-1972-1 | ENSG00000204524 | ZNF805     |
| hsa-mir-1972-1 | ENSG00000127483 | HP1BP3     |
| hsa-mir-1972-1 | ENSG00000169239 | CA5B       |
| hsa-mir-1972-1 | ENSG00000110723 | EXPH5      |
| hsa-mir-1972-1 | LRG_190         | MEFV       |
| hsa-mir-1972-2 | ENSG00000081760 | AACS       |
| hsa-mir-1972-2 | ENSG00000081760 | AACS       |
| hsa-mir-1972-2 | ENSG00000089060 | SLC24A6    |
| hsa-mir-1972-2 | ENSG00000104408 | EIF3E      |
| hsa-mir-1972-2 | ENSG00000105221 | AKT2       |
| hsa-mir-1972-2 | ENSG00000117640 | FAM54B     |
| hsa-mir-1972-2 | ENSG00000132517 | GPR172B    |
| hsa-mir-1972-2 | ENSG00000140104 | C14orf79   |
| hsa-mir-1972-2 | ENSG00000144619 | CNTN4      |
| hsa-mir-1972-2 | ENSG00000162241 | SLC25A45   |
| hsa-mir-1972-2 | ENSG00000162711 | NLRP3      |
| hsa-mir-1972-2 | ENSG00000165209 | STRBP      |
| hsa-mir-1972-2 | ENSG00000166448 | TMEM130    |
| hsa-mir-1972-2 | ENSG00000167986 | DDB1       |

|                |                 |                 |
|----------------|-----------------|-----------------|
| hsa-mir-1972-2 | ENSG00000170445 | HARS            |
| hsa-mir-1972-2 | ENSG00000174233 | ADCY6           |
| hsa-mir-1972-2 | ENSG00000176681 | LRR37A          |
| hsa-mir-1972-2 | ENSG00000180902 | D2HGDH          |
| hsa-mir-1972-2 | ENSG00000185024 | BRF1            |
| hsa-mir-1972-2 | ENSG00000185324 | CDK10           |
| hsa-mir-1972-2 | ENSG00000186318 | BACE1           |
| hsa-mir-1972-2 | ENSG00000188368 | PRR19           |
| hsa-mir-1972-2 | ENSG00000197859 | ADAMTSL2        |
| hsa-mir-1972-2 | ENSG00000198646 | NCOA6           |
| hsa-mir-1972-2 | ENSG00000204172 | AGAP10          |
| hsa-mir-1972-2 | ENSG00000204410 | MSH5            |
| hsa-mir-1972-2 | ENSG00000204628 | GNB2L1          |
| hsa-mir-1972-2 | ENSG00000213599 | SULT1A3         |
| hsa-mir-1972-2 | ENSG00000213648 | SULT1A4         |
| hsa-mir-1972-2 | ENSG00000235569 | MSH5            |
| hsa-mir-1972-2 | ENSG00000254081 | CTD-3025N20.2.1 |
| hsa-mir-1972-2 | ENSG00000258947 | RP11-566K11.2.1 |
| hsa-mir-1972-2 | ENSG00000258947 | RP11-566K11.2.1 |
| hsa-mir-1972-2 | ENSG00000257409 | CR788282.2      |
| hsa-mir-1972-2 | ENSG00000257459 | CR388382.1      |
| hsa-mir-1972-2 | ENSG00000166575 | TMEM135         |
| hsa-mir-1972-2 | ENSG00000162946 | DISC1           |
| hsa-mir-1972-2 | ENSG00000179912 | R3HDM2          |
| hsa-mir-1972-2 | ENSG00000130985 | UBA1            |
| hsa-mir-1972-2 | ENSG00000212670 | AL161915.1      |
| hsa-mir-1972-2 | ENSG00000163110 | PDLIM5          |
| hsa-mir-1972-2 | ENSG00000203286 | AL365202.1      |
| hsa-mir-1972-2 | ENSG00000257349 | AL844220.2      |
| hsa-mir-1972-2 | ENSG00000103313 | MEFV            |
| hsa-mir-1972-2 | ENSG00000175898 | S1PR2           |
| hsa-mir-1972-2 | ENSG00000204524 | ZNF805          |
| hsa-mir-1972-2 | ENSG00000126562 | WNK4            |

|                 |                 |         |
|-----------------|-----------------|---------|
| hsa-mir-1972-2  | ENSG00000196917 | HCAR1   |
| hsa-mir-1972-2  | ENSG00000188000 | OR7D2   |
| hsa-mir-1972-2  | ENSG00000127483 | HP1BP3  |
| hsa-mir-1972-2  | ENSG00000169239 | CA5B    |
| hsa-mir-1972-2  | ENSG00000110723 | EXPH5   |
| hsa-mir-1972-2  | LRG_190         | MEFV    |
| hsa-mir-2054    | ENSG00000065534 | MYLK    |
| hsa-mir-2054    | ENSG00000123562 | MORF4L2 |
| hsa-mir-2054    | ENSG00000151322 | NPAS3   |
| hsa-mir-2054    | ENSG00000151743 | AMN1    |
| hsa-mir-2054    | ENSG00000147789 | ZNF7    |
| hsa-mir-2054    | ENSG00000171777 | RASGRP4 |
| hsa-mir-2054    | ENSG00000081138 | CDH7    |
| hsa-mir-2054    | ENSG00000138735 | PDE5A   |
| hsa-mir-28_3p   | ENSG00000141622 | RNF165  |
| hsa-mir-28_5p   | ENSG00000164136 | IL15    |
| hsa-mir-28_5p   | ENSG00000180957 | PITPNB  |
| hsa-mir-28_5p   | ENSG00000108309 | RUNDC3A |
| hsa-mir-28_5p   | ENSG00000106608 | URGCP   |
| hsa-mir-28_5p   | ENSG00000122741 | DCAF10  |
| hsa-mir-28_5p   | ENSG00000144043 | TEX261  |
| hsa-mir-28_5p   | ENSG00000152578 | GRIA4   |
| hsa-mir-28_5p   | ENSG00000134046 | MBD2    |
| hsa-mir-28_5p   | ENSG00000117598 | LPPR5.1 |
| hsa-mir-28_5p   | ENSG00000124466 | LYPD3   |
| hsa-mir-28_5p   | ENSG00000102921 | N4BP1   |
| hsa-mir-28_5p   | ENSG00000169016 | E2F6    |
| hsa-mir-28_5p   | ENSG00000135999 | EPC2    |
| hsa-mir-28_5p   | ENSG00000123472 | ATPAF1  |
| hsa-mir-28_5p   | ENSG00000116641 | DOCK7   |
| hsa-mir-297     | ENSG00000122477 | LRRC39  |
| hsa-mir-297     | ENSG00000168077 | SCARA3  |
| hsa-mir-297     | ENSG00000168077 | SCARA3  |
| hsa-mir-297     | ENSG00000198642 | KLHL9   |
| hsa-mir-301a_5p | ENSG00000105856 | HBP1    |
| hsa-mir-301a_5p | ENSG00000175445 | LPL     |



|                 |                 |            |
|-----------------|-----------------|------------|
| hsa-mir-301a_5p | ENSG00000082175 | PGR        |
| hsa-mir-301a_5p | ENSG00000166004 | KIAA1731   |
| hsa-mir-301a_5p | ENSG00000136573 | BLK        |
| hsa-mir-302a_3p | ENSG00000010818 | HIVEP2     |
| hsa-mir-302a_5p | ENSG00000099331 | MYO9B      |
| hsa-mir-302a_5p | ENSG00000183735 | TBK1       |
| hsa-mir-302b_3p | ENSG00000010818 | HIVEP2     |
| hsa-mir-302b_5p | ENSG00000107968 | MAP3K8     |
| hsa-mir-302b_5p | ENSG00000151632 | AKR1C2     |
| hsa-mir-302c_3p | ENSG00000010818 | HIVEP2     |
| hsa-mir-302c_3p | ENSG00000130347 | RTN4IP1    |
| hsa-mir-302c_5p | ENSG00000103522 | IL21R      |
| hsa-mir-302c_5p | ENSG00000163141 | BNIP1      |
| hsa-mir-302c_5p | ENSG00000100321 | SYNGR1     |
| hsa-mir-302d_5p | ENSG00000153046 | CDYL       |
| hsa-mir-302e    | ENSG00000042980 | ADAM28     |
| hsa-mir-302e    | ENSG00000042980 | ADAM28     |
| hsa-mir-302f    | ENSG00000184571 | PIWIL3     |
| hsa-mir-302f    | ENSG00000166128 | RAB8B      |
| hsa-mir-3118-1  | ENSG00000183206 | POTEC      |
| hsa-mir-3118-2  | ENSG00000183206 | POTEC      |
| hsa-mir-3118-3  | ENSG00000183206 | POTEC      |
| hsa-mir-3118-4  | ENSG00000183206 | POTEC      |
| hsa-mir-3118-5  | ENSG00000183206 | POTEC      |
| hsa-mir-3118-6  | ENSG00000183206 | POTEC      |
| hsa-mir-3133    | ENSG00000147853 | AK3        |
| hsa-mir-3134    | ENSG00000212997 | AC023632.1 |
| hsa-mir-3134    | ENSG00000140538 | NTRK3      |
| hsa-mir-3135a   | ENSG00000175782 | SLC35E3    |
| hsa-mir-3137    | ENSG00000105270 | CLIP3      |
| hsa-mir-3137    | ENSG00000157796 | WDR19      |
| hsa-mir-3142    | ENSG00000215790 | SLC35E2    |
| hsa-mir-3149    | ENSG00000150045 | KLRF1      |
| hsa-mir-3149    | ENSG00000162551 | ALPL       |
| hsa-mir-3149    | ENSG00000170382 | LRRN2      |
| hsa-mir-3149    | ENSG00000177511 | ST8SIA3    |

|                  |                 |                 |
|------------------|-----------------|-----------------|
| hsa-mir-3149     | ENSG00000196963 | PCDHB16         |
| hsa-mir-3149     | ENSG00000147955 | SIGMAR1         |
| hsa-mir-3149     | ENSG00000131080 | EDA2R           |
| hsa-mir-3149     | ENSG00000169083 | AR              |
| hsa-mir-3149     | ENSG00000102781 | KATNAL1         |
| hsa-mir-3149     | ENSG00000165288 | BRWD3           |
| hsa-mir-3149     | ENSG00000113361 | CDH6            |
| hsa-mir-3149     | ENSG00000117859 | OSBPL9          |
| hsa-mir-3149     | ENSG00000160551 | TAOK1           |
| hsa-mir-3149     | ENSG00000164086 | DUSP7           |
| hsa-mir-3149     | ENSG00000196591 | HDAC2           |
| hsa-mir-3150a_3p | ENSG00000179240 | RP11-111M22.2.1 |
| hsa-mir-3150a_3p | ENSG00000170324 | FRMPD2          |
| hsa-mir-3150a_3p | ENSG00000123360 | PDE1B           |
| hsa-mir-3150b_5p | ENSG00000163482 | STK36           |
| hsa-mir-3159     | ENSG00000186318 | BACE1           |
| hsa-mir-3164     | ENSG00000103353 | UBFD1           |
| hsa-mir-3171     | ENSG00000151623 | NR3C2           |
| hsa-mir-3171     | ENSG00000082898 | XPO1            |
| hsa-mir-3171     | ENSG00000082898 | XPO1            |
| hsa-mir-3195     | ENSG00000149679 | CABLES2         |
| hsa-mir-3195     | ENSG00000172354 | GNB2            |
| hsa-mir-3195     | ENSG00000188321 | ZNF559          |
| hsa-mir-3195     | ENSG00000130699 | TAF4            |
| hsa-mir-3200_3p  | ENSG00000145604 | SKP2            |
| hsa-mir-3200_3p  | ENSG00000148396 | SEC16A          |
| hsa-mir-325      | ENSG00000118058 | MLL             |
| hsa-mir-325      | ENSG00000118058 | MLL             |
| hsa-mir-329-1    | ENSG00000164251 | F2RL1           |
| hsa-mir-340_3p   | ENSG00000187037 | GPR141          |
| hsa-mir-340_5p   | ENSG00000106588 | PSMA2           |
| hsa-mir-340_5p   | ENSG00000144026 | ZNF514          |
| hsa-mir-340_5p   | ENSG00000182747 | SLC35D3         |
| hsa-mir-342_3p   | ENSG00000084453 | SLCO1A2         |
| hsa-mir-345_5p   | ENSG00000149397 | #N/A            |
| hsa-mir-3611     | ENSG00000150628 | SPATA4          |

|                   |                 |               |
|-------------------|-----------------|---------------|
| hsa-mir-3620      | ENSG00000138964 | PARVG         |
| hsa-mir-3620      | ENSG00000245317 | CTC-241N9.1.1 |
| hsa-mir-3620      | ENSG00000065320 | NTN1          |
| hsa-mir-3648      | ENSG00000219200 | RNASEK        |
| hsa-mir-3648      | ENSG00000105650 | PDE4C         |
| hsa-mir-3665      | ENSG00000139737 | SLAIN1        |
| hsa-mir-3673      | ENSG00000180479 | ZNF571        |
| hsa-mir-3676_3p   | ENSG00000197891 | SLC22A12      |
| hsa-mir-3676_5p   | ENSG00000188725 | C5orf43       |
| hsa-mir-3676_5p   | ENSG00000157349 | DDX19B        |
| hsa-mir-3680-1_3p | ENSG00000105519 | CAPS          |
| hsa-mir-3686      | ENSG00000126870 | WDR60         |
| hsa-mir-3686      | ENSG00000175376 | EIF1AD        |
| hsa-mir-3689b_3p  | ENSG00000151233 | GXYLT1        |
| hsa-mir-3689b_3p  | ENSG00000166689 | PLEKHA7       |
| hsa-mir-376a-1_3p | ENSG00000107165 | TYRP1         |
| hsa-mir-376a-1_3p | ENSG00000158055 | GRHL3         |
| hsa-mir-376a-1_3p | ENSG00000012174 | MBTPS2        |
| hsa-mir-376a-1_3p | ENSG00000184258 | CDR1          |
| hsa-mir-376a-1_3p | ENSG00000060982 | BCAT1         |
| hsa-mir-376a-1_3p | ENSG00000182628 | SKA2          |
| hsa-mir-376a-1_5p | ENSG00000105928 | DFNA5         |
| hsa-mir-376a-1_5p | ENSG00000105793 | GTPBP10       |
| hsa-mir-376b      | ENSG00000107165 | TYRP1         |
| hsa-mir-376b      | ENSG00000150471 | LPHN3         |
| hsa-mir-376b      | ENSG00000158055 | GRHL3         |
| hsa-mir-376b      | ENSG00000124596 | C6orf130      |
| hsa-mir-376b      | ENSG00000121797 | CCRL2         |
| hsa-mir-376b      | ENSG00000060982 | BCAT1         |
| hsa-mir-376b      | ENSG00000182628 | SKA2          |
| hsa-mir-376c      | ENSG00000131002 | CYorf15B.1    |
| hsa-mir-376c      | ENSG00000027075 | PRKCH         |
| hsa-mir-378b      | ENSG00000106771 | C9orf5        |
| hsa-mir-3919      | ENSG00000197013 | ZNF429        |
| hsa-mir-3919      | ENSG00000121073 | SLC35B1       |
| hsa-mir-3919      | ENSG00000135069 | PSAT1         |

|                   |                 |          |
|-------------------|-----------------|----------|
| hsa-mir-3934      | ENSG00000168748 | CA7      |
| hsa-mir-3934      | ENSG00000166822 | TMEM170A |
| hsa-mir-3934      | ENSG00000101076 | HNF4A    |
| hsa-mir-3934      | ENSG00000141068 | KSR1     |
| hsa-mir-3934      | ENSG00000072501 | SMC1A    |
| hsa-mir-421       | ENSG00000113456 | RAD1     |
| hsa-mir-421       | ENSG00000165874 | FAM35B   |
| hsa-mir-421       | ENSG00000074054 | CLASP1   |
| hsa-mir-421       | ENSG00000182866 | LCK      |
| hsa-mir-4326      | ENSG00000150764 | DIXDC1   |
| hsa-mir-450a-1_5p | ENSG00000184277 | TM2D3    |
| hsa-mir-450a-2_3p | ENSG00000179046 | TRIML2   |
| hsa-mir-450a-2_3p | ENSG00000164484 | TMEM200A |
| hsa-mir-450a-2_5p | ENSG00000119725 | ZNF410   |
| hsa-mir-450a-2_5p | ENSG00000065526 | SPEN     |
| hsa-mir-450b_5p   | ENSG00000038382 | TRIO     |
| hsa-mir-450b_5p   | ENSG00000184277 | TM2D3    |
| hsa-mir-466       | ENSG00000026103 | FAS      |
| hsa-mir-493_3p    | ENSG00000104964 | AES      |
| hsa-mir-493_3p    | ENSG00000064042 | LIMCH1   |
| hsa-mir-493_3p    | ENSG00000161082 | CELF5    |
| hsa-mir-493_3p    | ENSG00000161202 | DVL3     |
| hsa-mir-493_5p    | ENSG00000065675 | PRKCQ    |
| hsa-mir-493_5p    | ENSG00000070159 | PTPN3    |
| hsa-mir-501_5p    | ENSG00000171793 | CTPS     |
| hsa-mir-501_5p    | ENSG00000197937 | ZNF347   |
| hsa-mir-501_5p    | ENSG00000108883 | EFTUD2   |
| hsa-mir-544a      | ENSG00000144560 | VGLL4    |
| hsa-mir-544a      | ENSG00000140632 | GLYR1    |
| hsa-mir-544a      | ENSG00000078018 | MAP2     |
| hsa-mir-544a      | ENSG00000144560 | VGLL4    |
| hsa-mir-544a      | ENSG00000197279 | ZNF165   |
| hsa-mir-544a      | ENSG00000130066 | SAT1     |
| hsa-mir-544a      | ENSG00000183035 | CYLC1    |
| hsa-mir-544a      | ENSG00000142178 | SIK1     |
| hsa-mir-544a      | ENSG00000173681 | CXorf23  |

|                   |                 |            |
|-------------------|-----------------|------------|
| hsa-mir-544b      | ENSG00000171109 | MFN1       |
| hsa-mir-545_5p    | ENSG00000168807 | SNTB2      |
| hsa-mir-548a-1_3p | ENSG00000004468 | CD38       |
| hsa-mir-548a-1_3p | ENSG00000116205 | TCEANC2    |
| hsa-mir-548a-1_3p | ENSG00000184040 | FAM23B.1   |
| hsa-mir-548a-1_3p | ENSG00000148483 | TMEM236    |
| hsa-mir-548a-1_3p | ENSG00000132623 | ANKRD5     |
| hsa-mir-548a-1_3p | ENSG00000183908 | LRRC55     |
| hsa-mir-548a-1_3p | ENSG00000144455 | SUMF1      |
| hsa-mir-548a-1_3p | ENSG00000215020 | AL591684.1 |
| hsa-mir-548a-1_3p | ENSG00000215033 | AL603965.1 |
| hsa-mir-548a-1_3p | ENSG00000226264 | HLA-DMB    |
| hsa-mir-548a-1_3p | ENSG00000102781 | KATNAL1    |
| hsa-mir-548a-1_3p | ENSG00000139505 | MTMR6      |
| hsa-mir-548a-1_3p | ENSG00000122692 | SMU1       |
| hsa-mir-548a-1_3p | ENSG00000139133 | ALG10      |
| hsa-mir-548a-1_3p | ENSG00000175548 | ALG10B     |
| hsa-mir-548a-2_3p | ENSG00000139133 | ALG10      |
| hsa-mir-548a-2_3p | ENSG00000144455 | SUMF1      |
| hsa-mir-548a-2_3p | ENSG00000116205 | TCEANC2    |
| hsa-mir-548a-2_3p | ENSG00000004468 | CD38       |
| hsa-mir-548a-2_3p | ENSG00000175548 | ALG10B     |
| hsa-mir-548a-2_3p | ENSG00000122692 | SMU1       |
| hsa-mir-548a-2_3p | ENSG00000184040 | FAM23B.1   |
| hsa-mir-548a-2_3p | ENSG00000148483 | TMEM236    |
| hsa-mir-548a-2_3p | ENSG00000215020 | AL591684.1 |
| hsa-mir-548a-2_3p | ENSG00000215033 | AL603965.1 |
| hsa-mir-548a-2_3p | ENSG00000132623 | ANKRD5     |
| hsa-mir-548a-2_3p | ENSG00000226264 | HLA-DMB    |
| hsa-mir-548a-2_3p | ENSG00000183908 | LRRC55     |
| hsa-mir-548a-2_3p | ENSG00000102781 | KATNAL1    |
| hsa-mir-548a-2_3p | ENSG00000139505 | MTMR6      |
| hsa-mir-548a-3_3p | ENSG00000139133 | ALG10      |
| hsa-mir-548a-3_3p | ENSG00000175548 | ALG10B     |
| hsa-mir-548a-3_3p | ENSG00000215020 | AL591684.1 |
| hsa-mir-548a-3_3p | ENSG00000215033 | AL603965.1 |

|                   |                 |              |
|-------------------|-----------------|--------------|
| hsa-mir-548a-3_3p | ENSG00000116205 | TCEANC2      |
| hsa-mir-548a-3_3p | ENSG00000004468 | CD38         |
| hsa-mir-548a-3_3p | ENSG00000139505 | MTMR6        |
| hsa-mir-548a-3_3p | ENSG00000102781 | KATNAL1      |
| hsa-mir-548a-3_3p | ENSG00000226264 | HLA-DMB      |
| hsa-mir-548a-3_3p | ENSG00000183908 | LRRC55       |
| hsa-mir-548a-3_3p | ENSG00000122692 | SMU1         |
| hsa-mir-548a-3_3p | ENSG00000132623 | ANKRD5       |
| hsa-mir-548a-3_3p | ENSG00000184040 | FAM23B.1     |
| hsa-mir-548a-3_3p | ENSG00000148483 | TMEM236      |
| hsa-mir-548a-3_3p | ENSG00000144455 | SUMF1        |
| hsa-mir-548a-3_5p | ENSG00000102781 | KATNAL1      |
| hsa-mir-548a-3_5p | ENSG00000226264 | HLA-DMB      |
| hsa-mir-548a-3_5p | ENSG00000139505 | MTMR6        |
| hsa-mir-548aa-1   | ENSG00000023697 | DERA         |
| hsa-mir-548aa-1   | ENSG00000188039 | NWD1         |
| hsa-mir-548aa-1   | ENSG00000139133 | ALG10        |
| hsa-mir-548aa-1   | ENSG00000144455 | SUMF1        |
| hsa-mir-548aa-1   | ENSG00000013375 | PGM3         |
| hsa-mir-548aa-1   | ENSG00000230891 | AC103588.1.1 |
| hsa-mir-548aa-1   | ENSG00000116205 | TCEANC2      |
| hsa-mir-548aa-1   | ENSG00000205726 | ITSN1        |
| hsa-mir-548aa-1   | ENSG00000102781 | KATNAL1      |
| hsa-mir-548aa-1   | ENSG00000139505 | MTMR6        |
| hsa-mir-548aa-1   | ENSG00000004468 | CD38         |
| hsa-mir-548aa-1   | ENSG00000183908 | LRRC55       |
| hsa-mir-548aa-1   | ENSG00000004897 | CDC27        |
| hsa-mir-548aa-1   | ENSG00000122692 | SMU1         |
| hsa-mir-548aa-1   | ENSG00000175548 | ALG10B       |
| hsa-mir-548aa-1   | ENSG00000174123 | TLR10        |
| hsa-mir-548aa-1   | ENSG00000184040 | FAM23B.1     |
| hsa-mir-548aa-1   | ENSG00000148483 | TMEM236      |
| hsa-mir-548aa-1   | ENSG00000215020 | AL591684.1   |
| hsa-mir-548aa-1   | ENSG00000215033 | AL603965.1   |
| hsa-mir-548aa-1   | ENSG00000132623 | ANKRD5       |
| hsa-mir-548aa-1   | ENSG00000128581 | RABL5        |

|                 |                 |            |
|-----------------|-----------------|------------|
| hsa-mir-548aa-1 | ENSG00000179909 | ZNF154     |
| hsa-mir-548aa-1 | ENSG00000226264 | HLA-DMB    |
| hsa-mir-548aa-1 | ENSG00000180801 | ARSJ       |
| hsa-mir-548aa-2 | ENSG00000023697 | DERA       |
| hsa-mir-548aa-2 | ENSG00000188039 | NWD1       |
| hsa-mir-548aa-2 | ENSG00000004468 | CD38       |
| hsa-mir-548aa-2 | ENSG00000226264 | HLA-DMB    |
| hsa-mir-548aa-2 | ENSG00000102781 | KATNAL1    |
| hsa-mir-548aa-2 | ENSG00000139505 | MTMR6      |
| hsa-mir-548aa-2 | ENSG00000183908 | LRRC55     |
| hsa-mir-548aa-2 | ENSG00000122692 | SMU1       |
| hsa-mir-548aa-2 | ENSG00000175548 | ALG10B     |
| hsa-mir-548aa-2 | ENSG00000139133 | ALG10      |
| hsa-mir-548aa-2 | ENSG00000128581 | RABL5      |
| hsa-mir-548aa-2 | ENSG00000174123 | TLR10      |
| hsa-mir-548aa-2 | ENSG00000180801 | ARSJ       |
| hsa-mir-548aa-2 | ENSG00000184040 | FAM23B.1   |
| hsa-mir-548aa-2 | ENSG00000148483 | TMEM236    |
| hsa-mir-548aa-2 | ENSG00000144455 | SUMF1      |
| hsa-mir-548aa-2 | ENSG00000215020 | AL591684.1 |
| hsa-mir-548aa-2 | ENSG00000215033 | AL603965.1 |
| hsa-mir-548aa-2 | ENSG00000132623 | ANKRD5     |
| hsa-mir-548aa-2 | ENSG00000116205 | TCEANC2    |
| hsa-mir-548aa-2 | ENSG00000205726 | ITSN1      |
| hsa-mir-548aa-2 | ENSG00000013375 | PGM3       |
| hsa-mir-548aa-2 | ENSG00000004897 | CDC27      |
| hsa-mir-548b_5p | ENSG00000138794 | CASP6      |
| hsa-mir-548b_5p | ENSG00000102781 | KATNAL1    |
| hsa-mir-548b_5p | ENSG00000132623 | ANKRD5     |
| hsa-mir-548b_5p | ENSG00000004468 | CD38       |
| hsa-mir-548b_5p | ENSG00000139133 | ALG10      |
| hsa-mir-548b_5p | ENSG00000175548 | ALG10B     |
| hsa-mir-548b_5p | ENSG00000139505 | MTMR6      |
| hsa-mir-548b_5p | ENSG00000226264 | HLA-DMB    |
| hsa-mir-548c_3p | ENSG00000226264 | HLA-DMB    |
| hsa-mir-548c_5p | ENSG00000226264 | HLA-DMB    |

|                   |                 |         |
|-------------------|-----------------|---------|
| hsa-mir-548d-1_3p | ENSG00000188039 | NWD1    |
| hsa-mir-548d-1_3p | ENSG00000179909 | ZNF154  |
| hsa-mir-548d-1_3p | ENSG00000102781 | KATNAL1 |
| hsa-mir-548d-1_3p | ENSG00000132623 | ANKRD5  |
| hsa-mir-548d-1_3p | ENSG00000116205 | TCEANC2 |
| hsa-mir-548d-1_3p | ENSG00000139133 | ALG10   |
| hsa-mir-548d-1_3p | ENSG00000175548 | ALG10B  |
| hsa-mir-548d-1_5p | ENSG00000175548 | ALG10B  |
| hsa-mir-548d-1_5p | ENSG00000139133 | ALG10   |
| hsa-mir-548d-1_5p | ENSG00000004468 | CD38    |
| hsa-mir-548d-1_5p | ENSG00000139505 | MTMR6   |
| hsa-mir-548d-1_5p | ENSG00000179909 | ZNF154  |
| hsa-mir-548d-1_5p | ENSG00000188039 | NWD1    |
| hsa-mir-548d-1_5p | ENSG00000128581 | RABL5   |
| hsa-mir-548d-1_5p | ENSG00000226264 | HLA-DMB |
| hsa-mir-548d-1_5p | ENSG00000102781 | KATNAL1 |
| hsa-mir-548d-1_5p | ENSG00000132623 | ANKRD5  |
| hsa-mir-548d-2_3p | ENSG00000188039 | NWD1    |
| hsa-mir-548d-2_3p | ENSG00000116205 | TCEANC2 |
| hsa-mir-548d-2_3p | ENSG00000102781 | KATNAL1 |
| hsa-mir-548d-2_3p | ENSG00000175548 | ALG10B  |
| hsa-mir-548d-2_3p | ENSG00000139133 | ALG10   |
| hsa-mir-548d-2_3p | ENSG00000132623 | ANKRD5  |
| hsa-mir-548d-2_5p | ENSG00000004468 | CD38    |
| hsa-mir-548d-2_5p | ENSG00000188039 | NWD1    |
| hsa-mir-548d-2_5p | ENSG00000137145 | DENND4C |
| hsa-mir-548d-2_5p | ENSG00000139505 | MTMR6   |
| hsa-mir-548d-2_5p | ENSG00000102781 | KATNAL1 |
| hsa-mir-548d-2_5p | ENSG00000175548 | ALG10B  |
| hsa-mir-548d-2_5p | ENSG00000139133 | ALG10   |
| hsa-mir-548d-2_5p | ENSG00000132623 | ANKRD5  |
| hsa-mir-548d-2_5p | ENSG00000128581 | RABL5   |
| hsa-mir-548d-2_5p | ENSG00000226264 | HLA-DMB |
| hsa-mir-548f-1    | ENSG00000144455 | SUMF1   |
| hsa-mir-548f-1    | ENSG00000226264 | HLA-DMB |
| hsa-mir-548f-2    | ENSG00000144455 | SUMF1   |



|                   |                 |              |
|-------------------|-----------------|--------------|
| hsa-mir-548f-2    | ENSG00000226264 | HLA-DMB      |
| hsa-mir-548f-3    | ENSG00000144455 | SUMF1        |
| hsa-mir-548f-3    | ENSG00000226264 | HLA-DMB      |
| hsa-mir-548f-4    | ENSG00000144455 | SUMF1        |
| hsa-mir-548f-4    | ENSG00000226264 | HLA-DMB      |
| hsa-mir-548f-4    | ENSG00000227921 | AL353791.1.1 |
| hsa-mir-548f-4    | ENSG00000106714 | CNTNAP3      |
| hsa-mir-548f-4    | ENSG00000154529 | CNTNAP3B     |
| hsa-mir-548f-5    | ENSG00000144455 | SUMF1        |
| hsa-mir-548f-5    | ENSG00000226264 | HLA-DMB      |
| hsa-mir-548g_3p   | ENSG00000185231 | MC2R         |
| hsa-mir-548g_3p   | ENSG00000226264 | HLA-DMB      |
| hsa-mir-548g_3p   | ENSG00000144455 | SUMF1        |
| hsa-mir-548g_5p   | ENSG00000180190 | C8orf42      |
| hsa-mir-548g_5p   | ENSG00000013375 | PGM3         |
| hsa-mir-548g_5p   | ENSG00000179909 | ZNF154       |
| hsa-mir-548g_5p   | ENSG00000185231 | MC2R         |
| hsa-mir-548g_5p   | ENSG00000132623 | ANKRD5       |
| hsa-mir-548g_5p   | ENSG00000102781 | KATNAL1      |
| hsa-mir-548g_5p   | ENSG00000226264 | HLA-DMB      |
| hsa-mir-548g_5p   | ENSG00000004897 | CDC27        |
| hsa-mir-548g_5p   | ENSG00000139505 | MTMR6        |
| hsa-mir-548g_5p   | ENSG00000137145 | DENND4C      |
| hsa-mir-548h-1_5p | ENSG00000102781 | KATNAL1      |
| hsa-mir-548h-1_5p | ENSG00000132623 | ANKRD5       |
| hsa-mir-548h-1_5p | ENSG00000226264 | HLA-DMB      |
| hsa-mir-548h-1_5p | ENSG00000139505 | MTMR6        |
| hsa-mir-548h-3_5p | ENSG00000139505 | MTMR6        |
| hsa-mir-548h-3_5p | ENSG00000102781 | KATNAL1      |
| hsa-mir-548h-3_5p | ENSG00000132623 | ANKRD5       |
| hsa-mir-548h-3_5p | ENSG00000226264 | HLA-DMB      |
| hsa-mir-548h-3_5p | ENSG00000198554 | WDHD1        |
| hsa-mir-548h-4_3p | ENSG00000215020 | AL591684.1   |
| hsa-mir-548h-4_3p | ENSG00000215033 | AL603965.1   |
| hsa-mir-548h-4_3p | ENSG00000116205 | TCEANC2      |
| hsa-mir-548h-4_3p | ENSG00000205726 | ITSN1        |

|                   |                 |          |
|-------------------|-----------------|----------|
| hsa-mir-548h-4_3p | ENSG00000102781 | KATNAL1  |
| hsa-mir-548h-4_3p | ENSG00000139505 | MTMR6    |
| hsa-mir-548h-4_3p | ENSG00000183908 | LRRC55   |
| hsa-mir-548h-4_3p | ENSG00000122692 | SMU1     |
| hsa-mir-548h-4_3p | ENSG00000184040 | FAM23B.1 |
| hsa-mir-548h-4_3p | ENSG00000148483 | TMEM236  |
| hsa-mir-548h-4_3p | ENSG00000144455 | SUMF1    |
| hsa-mir-548h-4_3p | ENSG00000132623 | ANKRD5   |
| hsa-mir-548h-4_3p | ENSG00000013375 | PGM3     |
| hsa-mir-548h-4_3p | ENSG00000226264 | HLA-DMB  |
| hsa-mir-548h-4_5p | ENSG00000139505 | MTMR6    |
| hsa-mir-548h-4_5p | ENSG00000102781 | KATNAL1  |
| hsa-mir-548h-4_5p | ENSG00000226264 | HLA-DMB  |
| hsa-mir-548h-4_5p | ENSG00000132623 | ANKRD5   |
| hsa-mir-548i-1    | ENSG00000139505 | MTMR6    |
| hsa-mir-548i-1    | ENSG00000154548 | SRSF12   |
| hsa-mir-548i-1    | ENSG00000132623 | ANKRD5   |
| hsa-mir-548i-1    | ENSG00000179909 | ZNF154   |
| hsa-mir-548i-1    | ENSG00000226264 | HLA-DMB  |
| hsa-mir-548i-1    | ENSG00000137145 | DENND4C  |
| hsa-mir-548i-1    | ENSG00000102781 | KATNAL1  |
| hsa-mir-548i-1    | ENSG00000004897 | CDC27    |
| hsa-mir-548i-2    | ENSG00000139505 | MTMR6    |
| hsa-mir-548i-2    | ENSG00000154548 | SRSF12   |
| hsa-mir-548i-2    | ENSG00000132623 | ANKRD5   |
| hsa-mir-548i-2    | ENSG00000179909 | ZNF154   |
| hsa-mir-548i-2    | ENSG00000137145 | DENND4C  |
| hsa-mir-548i-2    | ENSG00000102781 | KATNAL1  |
| hsa-mir-548i-2    | ENSG00000004897 | CDC27    |
| hsa-mir-548i-3    | ENSG00000139505 | MTMR6    |
| hsa-mir-548i-3    | ENSG00000154548 | SRSF12   |
| hsa-mir-548i-3    | ENSG00000132623 | ANKRD5   |
| hsa-mir-548i-3    | ENSG00000179909 | ZNF154   |
| hsa-mir-548i-3    | ENSG00000226264 | HLA-DMB  |
| hsa-mir-548i-3    | ENSG00000137145 | DENND4C  |
| hsa-mir-548i-3    | ENSG00000102781 | KATNAL1  |

|                |                 |          |
|----------------|-----------------|----------|
| hsa-mir-548i-3 | ENSG00000004897 | CDC27    |
| hsa-mir-548i-4 | ENSG00000102781 | KATNAL1  |
| hsa-mir-548i-4 | ENSG00000004897 | CDC27    |
| hsa-mir-548i-4 | ENSG00000226264 | HLA-DMB  |
| hsa-mir-548i-4 | ENSG00000139505 | MTMR6    |
| hsa-mir-548j   | ENSG00000132623 | ANKRD5   |
| hsa-mir-548j   | ENSG00000226264 | HLA-DMB  |
| hsa-mir-548j   | ENSG00000102781 | KATNAL1  |
| hsa-mir-548j   | ENSG00000139505 | MTMR6    |
| hsa-mir-548k   | ENSG00000158747 | NBL1     |
| hsa-mir-548k   | ENSG00000226264 | HLA-DMB  |
| hsa-mir-548k   | ENSG00000102781 | KATNAL1  |
| hsa-mir-548l   | ENSG00000139505 | MTMR6    |
| hsa-mir-548m   | ENSG00000100239 | PPP6R2   |
| hsa-mir-548m   | ENSG00000100722 | ZC3H14   |
| hsa-mir-548m   | ENSG00000143409 | FAM63A   |
| hsa-mir-548m   | ENSG00000151952 | TMEM132D |
| hsa-mir-548n   | ENSG00000128581 | RABL5    |
| hsa-mir-548n   | ENSG00000132623 | ANKRD5   |
| hsa-mir-548n   | ENSG00000139505 | MTMR6    |
| hsa-mir-548n   | ENSG00000102781 | KATNAL1  |
| hsa-mir-548n   | ENSG00000226264 | HLA-DMB  |
| hsa-mir-548n   | ENSG00000175548 | ALG10B   |
| hsa-mir-548p   | ENSG00000226264 | HLA-DMB  |
| hsa-mir-548p   | ENSG00000144455 | SUMF1    |
| hsa-mir-548q   | ENSG00000139505 | MTMR6    |
| hsa-mir-548q   | ENSG00000102781 | KATNAL1  |
| hsa-mir-548q   | ENSG00000004897 | CDC27    |
| hsa-mir-548q   | ENSG00000179909 | ZNF154   |
| hsa-mir-548q   | ENSG00000128581 | RABL5    |
| hsa-mir-548q   | ENSG00000226264 | HLA-DMB  |
| hsa-mir-548q   | ENSG00000108576 | SLC6A4   |
| hsa-mir-548s   | ENSG00000170917 | NUDT6    |
| hsa-mir-548s   | ENSG00000185917 | SETD4    |
| hsa-mir-548s   | ENSG00000187908 | DMBT1    |
| hsa-mir-548s   | ENSG00000110756 | HPS5     |

|                 |                 |              |
|-----------------|-----------------|--------------|
| hsa-mir-548t_3p | ENSG00000188039 | NWD1         |
| hsa-mir-548t_3p | ENSG00000102781 | KATNAL1      |
| hsa-mir-548t_3p | ENSG00000128581 | RABL5        |
| hsa-mir-548t_3p | ENSG00000179909 | ZNF154       |
| hsa-mir-548t_3p | ENSG00000139505 | MTMR6        |
| hsa-mir-548t_3p | ENSG00000004468 | CD38         |
| hsa-mir-548t_3p | ENSG00000183908 | LRRC55       |
| hsa-mir-548t_3p | ENSG00000122692 | SMU1         |
| hsa-mir-548t_3p | ENSG00000175548 | ALG10B       |
| hsa-mir-548t_3p | ENSG00000139133 | ALG10        |
| hsa-mir-548t_3p | ENSG00000174123 | TLR10        |
| hsa-mir-548t_3p | ENSG00000180801 | ARSJ         |
| hsa-mir-548t_3p | ENSG00000184040 | FAM23B.1     |
| hsa-mir-548t_3p | ENSG00000148483 | TMEM236      |
| hsa-mir-548t_3p | ENSG00000226264 | HLA-DMB      |
| hsa-mir-548t_3p | ENSG00000144455 | SUMF1        |
| hsa-mir-548t_3p | ENSG00000215020 | AL591684.1   |
| hsa-mir-548t_3p | ENSG00000215033 | AL603965.1   |
| hsa-mir-548t_3p | ENSG00000132623 | ANKRD5       |
| hsa-mir-548t_3p | ENSG00000116205 | TCEANC2      |
| hsa-mir-548t_3p | ENSG00000205726 | ITSN1        |
| hsa-mir-548t_3p | ENSG00000013375 | PGM3         |
| hsa-mir-548t_3p | ENSG00000230891 | AC103588.1.1 |
| hsa-mir-548t_3p | ENSG00000004897 | CDC27        |
| hsa-mir-548u    | ENSG00000116205 | TCEANC2      |
| hsa-mir-548u    | ENSG00000004468 | CD38         |
| hsa-mir-548u    | ENSG00000139505 | MTMR6        |
| hsa-mir-548u    | ENSG00000183908 | LRRC55       |
| hsa-mir-548u    | ENSG00000122692 | SMU1         |
| hsa-mir-548u    | ENSG00000139133 | ALG10        |
| hsa-mir-548u    | ENSG00000175548 | ALG10B       |
| hsa-mir-548u    | ENSG00000144455 | SUMF1        |
| hsa-mir-548u    | ENSG00000215020 | AL591684.1   |
| hsa-mir-548u    | ENSG00000215033 | AL603965.1   |
| hsa-mir-548u    | ENSG00000132623 | ANKRD5       |
| hsa-mir-548u    | ENSG00000226264 | HLA-DMB      |

|                 |                 |            |
|-----------------|-----------------|------------|
| hsa-mir-548u    | ENSG00000184040 | FAM23B.1   |
| hsa-mir-548u    | ENSG00000148483 | TMEM236    |
| hsa-mir-548u    | ENSG00000102781 | KATNAL1    |
| hsa-mir-548v    | ENSG00000144455 | SUMF1      |
| hsa-mir-548v    | ENSG00000116205 | TCEANC2    |
| hsa-mir-548v    | ENSG00000184040 | FAM23B.1   |
| hsa-mir-548v    | ENSG00000148483 | TMEM236    |
| hsa-mir-548v    | ENSG00000132623 | ANKRD5     |
| hsa-mir-548v    | ENSG00000215020 | AL591684.1 |
| hsa-mir-548v    | ENSG00000215033 | AL603965.1 |
| hsa-mir-548v    | ENSG00000179909 | ZNF154     |
| hsa-mir-548v    | ENSG00000226264 | HLA-DMB    |
| hsa-mir-548v    | ENSG00000183908 | LRRC55     |
| hsa-mir-548v    | ENSG00000102781 | KATNAL1    |
| hsa-mir-548w    | ENSG00000170364 | SETMAR     |
| hsa-mir-548w    | ENSG00000139505 | MTMR6      |
| hsa-mir-548w    | ENSG00000179909 | ZNF154     |
| hsa-mir-548w    | ENSG00000137145 | DENND4C    |
| hsa-mir-548w    | ENSG00000226264 | HLA-DMB    |
| hsa-mir-548w    | ENSG00000102781 | KATNAL1    |
| hsa-mir-548x_3p | ENSG00000144455 | SUMF1      |
| hsa-mir-548x_3p | ENSG00000226264 | HLA-DMB    |
| hsa-mir-548x_3p | ENSG00000183908 | LRRC55     |
| hsa-mir-548x_3p | ENSG00000122692 | SMU1       |
| hsa-mir-548x_3p | ENSG00000215020 | AL591684.1 |
| hsa-mir-548x_3p | ENSG00000215033 | AL603965.1 |
| hsa-mir-548x_5p | ENSG00000180190 | C8orf42    |
| hsa-mir-548x_5p | ENSG00000013375 | PGM3       |
| hsa-mir-548x_5p | ENSG00000139505 | MTMR6      |
| hsa-mir-548x_5p | ENSG00000185231 | MC2R       |
| hsa-mir-548x_5p | ENSG00000132623 | ANKRD5     |
| hsa-mir-548x_5p | ENSG00000102781 | KATNAL1    |
| hsa-mir-548x_5p | ENSG00000226264 | HLA-DMB    |
| hsa-mir-548x_5p | ENSG00000179909 | ZNF154     |
| hsa-mir-548x_5p | ENSG00000004897 | CDC27      |
| hsa-mir-548z    | ENSG00000226264 | HLA-DMB    |

|             |                 |            |
|-------------|-----------------|------------|
| hsa-mir-558 | ENSG00000100034 | PPM1F      |
| hsa-mir-558 | ENSG00000115840 | SLC25A12   |
| hsa-mir-558 | ENSG00000101639 | CEP192     |
| hsa-mir-566 | ENSG00000033030 | ZCCHC8     |
| hsa-mir-566 | ENSG00000064115 | TM7SF3     |
| hsa-mir-566 | ENSG00000075089 | ACTR6      |
| hsa-mir-566 | ENSG00000078070 | MCCC1      |
| hsa-mir-566 | ENSG00000078269 | SYNJ2      |
| hsa-mir-566 | ENSG00000081760 | AACS       |
| hsa-mir-566 | ENSG00000106608 | URGCP      |
| hsa-mir-566 | ENSG00000121350 | PYROXD1    |
| hsa-mir-566 | ENSG00000131374 | TBC1D5     |
| hsa-mir-566 | ENSG00000134824 | FADS2      |
| hsa-mir-566 | ENSG00000137492 | PRKRIR     |
| hsa-mir-566 | ENSG00000140104 | C14orf79   |
| hsa-mir-566 | ENSG00000148297 | MED22      |
| hsa-mir-566 | ENSG00000156869 | FRRS1      |
| hsa-mir-566 | ENSG00000160691 | SHC1       |
| hsa-mir-566 | ENSG00000162144 | CYBASC3    |
| hsa-mir-566 | ENSG00000162711 | NLRP3      |
| hsa-mir-566 | ENSG00000167077 | MEI1       |
| hsa-mir-566 | ENSG00000167986 | DDB1       |
| hsa-mir-566 | ENSG00000174233 | ADCY6      |
| hsa-mir-566 | ENSG00000175727 | MLXIP      |
| hsa-mir-566 | ENSG00000176915 | ANKLE2     |
| hsa-mir-566 | ENSG00000176974 | SHMT1      |
| hsa-mir-566 | ENSG00000177000 | MTHFR      |
| hsa-mir-566 | ENSG00000182551 | ADI1       |
| hsa-mir-566 | ENSG00000184343 | SRPK3      |
| hsa-mir-566 | ENSG00000185024 | BRF1       |
| hsa-mir-566 | ENSG00000185024 | BRF1       |
| hsa-mir-566 | ENSG00000204172 | AGAP10     |
| hsa-mir-566 | ENSG00000258659 | TRIM34     |
| hsa-mir-566 | ENSG00000257330 | AL662867.1 |
| hsa-mir-566 | ENSG00000257149 | AC127032.1 |
| hsa-mir-566 | ENSG00000257936 | AC139677.7 |

|                |                 |            |
|----------------|-----------------|------------|
| hsa-mir-566    | ENSG00000214919 | AC104472.1 |
| hsa-mir-566    | ENSG00000174898 | TMEM146    |
| hsa-mir-566    | ENSG00000109911 | ELP4       |
| hsa-mir-566    | ENSG00000196141 | SPATS2L    |
| hsa-mir-566    | ENSG00000139726 | DENR       |
| hsa-mir-566    | ENSG00000103021 | CCDC113    |
| hsa-mir-566    | ENSG00000173598 | NUDT4      |
| hsa-mir-566    | ENSG00000006638 | TBXA2R     |
| hsa-mir-566    | ENSG00000081320 | STK17B     |
| hsa-mir-567    | ENSG00000185038 | HEATR7B1   |
| hsa-mir-568    | ENSG00000114698 | PLSCR4     |
| hsa-mir-568    | ENSG00000122012 | SV2C       |
| hsa-mir-568    | ENSG00000106723 | SPIN1      |
| hsa-mir-570_3p | ENSG00000107105 | ELAVL2     |
| hsa-mir-570_3p | ENSG00000198908 | BHLHB9     |
| hsa-mir-570_3p | ENSG00000160551 | TAOK1      |
| hsa-mir-570_5p | ENSG00000122299 | ZC3H7A     |
| hsa-mir-574_3p | ENSG00000134532 | SOX5       |
| hsa-mir-574_3p | ENSG00000138029 | HADHB      |
| hsa-mir-574_3p | ENSG00000144476 | CXCR7      |
| hsa-mir-574_5p | ENSG00000006116 | CACNG3     |
| hsa-mir-574_5p | ENSG00000006116 | CACNG3     |
| hsa-mir-574_5p | ENSG00000048540 | LMO3       |
| hsa-mir-574_5p | ENSG00000061455 | PRDM6      |
| hsa-mir-574_5p | ENSG00000064205 | WISP2      |
| hsa-mir-574_5p | ENSG00000064205 | WISP2      |
| hsa-mir-574_5p | ENSG00000064205 | WISP2      |
| hsa-mir-574_5p | ENSG00000075089 | ACTR6      |
| hsa-mir-574_5p | ENSG00000075213 | SEMA3A     |
| hsa-mir-574_5p | ENSG00000075213 | SEMA3A     |
| hsa-mir-574_5p | ENSG00000079102 | RUNX1T1    |
| hsa-mir-574_5p | ENSG00000088038 | CNOT3      |
| hsa-mir-574_5p | ENSG00000089022 | MAPKAPK5   |

|                |                 |          |
|----------------|-----------------|----------|
| hsa-mir-574_5p | ENSG00000089818 | NECAP1   |
| hsa-mir-574_5p | ENSG00000089818 | NECAP1   |
| hsa-mir-574_5p | ENSG00000090447 | TFAP4    |
| hsa-mir-574_5p | ENSG00000090447 | TFAP4    |
| hsa-mir-574_5p | ENSG00000106278 | PTPRZ1   |
| hsa-mir-574_5p | ENSG00000106278 | PTPRZ1   |
| hsa-mir-574_5p | ENSG00000106278 | PTPRZ1   |
| hsa-mir-574_5p | ENSG00000108349 | CASC3    |
| hsa-mir-574_5p | ENSG00000120457 | KCNJ5    |
| hsa-mir-574_5p | ENSG00000123411 | IKZF4    |
| hsa-mir-574_5p | ENSG00000130023 | C6orf70  |
| hsa-mir-574_5p | ENSG00000136267 | DGKB     |
| hsa-mir-574_5p | ENSG00000136267 | DGKB     |
| hsa-mir-574_5p | ENSG00000136630 | HLX      |
| hsa-mir-574_5p | ENSG00000138385 | SSB      |
| hsa-mir-574_5p | ENSG00000138385 | SSB      |
| hsa-mir-574_5p | ENSG00000143870 | PDIA6    |
| hsa-mir-574_5p | ENSG00000143870 | PDIA6    |
| hsa-mir-574_5p | ENSG00000144791 | LIMD1    |
| hsa-mir-574_5p | ENSG00000145681 | HAPLN1   |
| hsa-mir-574_5p | ENSG00000145681 | HAPLN1   |
| hsa-mir-574_5p | ENSG00000145681 | HAPLN1   |
| hsa-mir-574_5p | ENSG00000146426 | TIAM2    |
| hsa-mir-574_5p | ENSG00000149948 | HMGA2    |
| hsa-mir-574_5p | ENSG00000151474 | FRMD4A   |
| hsa-mir-574_5p | ENSG00000152061 | RABGAP1L |



|                |                 |            |
|----------------|-----------------|------------|
| hsa-mir-574_5p | ENSG00000152061 | RABGAP1L   |
| hsa-mir-574_5p | ENSG00000153902 | LGI4       |
| hsa-mir-574_5p | ENSG00000164106 | SCRG1      |
| hsa-mir-574_5p | ENSG00000164106 | SCRG1      |
| hsa-mir-574_5p | ENSG00000167100 | SAMD14     |
| hsa-mir-574_5p | ENSG00000167100 | SAMD14     |
| hsa-mir-574_5p | ENSG00000167100 | SAMD14     |
| hsa-mir-574_5p | ENSG00000171840 | NINJ2      |
| hsa-mir-574_5p | ENSG00000172346 | CSDC2      |
| hsa-mir-574_5p | ENSG00000176134 | AL445665.1 |
| hsa-mir-574_5p | ENSG00000176134 | AL445665.1 |
| hsa-mir-574_5p | ENSG00000176697 | BDNF       |
| hsa-mir-574_5p | ENSG00000177511 | ST8SIA3    |
| hsa-mir-574_5p | ENSG00000177511 | ST8SIA3    |
| hsa-mir-574_5p | ENSG00000177511 | ST8SIA3    |
| hsa-mir-574_5p | ENSG00000181072 | CHRM2      |
| hsa-mir-574_5p | ENSG00000182508 | LHFPL1     |
| hsa-mir-574_5p | ENSG00000182508 | LHFPL1     |
| hsa-mir-574_5p | ENSG00000185985 | SLITRK2    |
| hsa-mir-574_5p | ENSG00000186231 | KLHL32     |
| hsa-mir-574_5p | ENSG00000186231 | KLHL32     |
| hsa-mir-574_5p | ENSG00000186231 | KLHL32     |
| hsa-mir-574_5p | ENSG00000186635 | ARAP1      |
| hsa-mir-574_5p | ENSG00000186635 | ARAP1      |
| hsa-mir-574_5p | ENSG00000189058 | APOD       |
| hsa-mir-574_5p | ENSG00000189058 | APOD       |
| hsa-mir-574_5p | ENSG00000196963 | PCDHB16    |
| hsa-mir-574_5p | ENSG00000198570 | RD3        |
| hsa-mir-574_5p | ENSG00000204283 | AC015804.1 |
| hsa-mir-574_5p | ENSG00000214510 | SPINK13    |

|                |                 |               |
|----------------|-----------------|---------------|
| hsa-mir-574_5p | ENSG00000214510 | SPINK13       |
| hsa-mir-574_5p | ENSG00000214510 | SPINK13       |
| hsa-mir-574_5p | ENSG00000214510 | SPINK13       |
| hsa-mir-574_5p | ENSG00000215066 | C9orf38       |
| hsa-mir-574_5p | ENSG00000221888 | OR1C1         |
| hsa-mir-574_5p | ENSG00000221888 | OR1C1         |
| hsa-mir-574_5p | ENSG00000221888 | OR1C1         |
| hsa-mir-574_5p | ENSG00000235370 | CSPG4P5       |
| hsa-mir-574_5p | ENSG00000231997 | FAM27D1.1     |
| hsa-mir-574_5p | ENSG00000231997 | FAM27D1.1     |
| hsa-mir-574_5p | ENSG00000224867 | AC096644.1    |
| hsa-mir-574_5p | ENSG00000127418 | FGFRL1        |
| hsa-mir-574_5p | ENSG00000100605 | ITPK1         |
| hsa-mir-574_5p | ENSG00000257981 | CR547129.1    |
| hsa-mir-574_5p | ENSG00000257981 | CR547129.1    |
| hsa-mir-574_5p | ENSG00000257981 | CR547129.1    |
| hsa-mir-574_5p | ENSG00000258213 | AL844527.3    |
| hsa-mir-574_5p | ENSG00000258213 | AL844527.3    |
| hsa-mir-574_5p | ENSG00000258213 | AL844527.3    |
| hsa-mir-574_5p | ENSG00000177511 | ST8SIA3       |
| hsa-mir-574_5p | ENSG00000177511 | ST8SIA3       |
| hsa-mir-574_5p | ENSG00000216560 | RP3-368B9.1.1 |
| hsa-mir-574_5p | ENSG00000159921 | GNE           |
| hsa-mir-574_5p | ENSG00000159921 | GNE           |
| hsa-mir-574_5p | ENSG00000177354 | C10orf71      |
| hsa-mir-574_5p | ENSG00000231997 | FAM27D1.1     |
| hsa-mir-574_5p | ENSG00000106078 | COBL          |
| hsa-mir-574_5p | ENSG00000169083 | AR            |
| hsa-mir-574_5p | ENSG00000169083 | AR            |
| hsa-mir-574_5p | ENSG00000169083 | AR            |

|                |                 |            |
|----------------|-----------------|------------|
| hsa-mir-574_5p | ENSG00000169083 | AR         |
| hsa-mir-574_5p | ENSG00000137713 | PPP2R1B    |
| hsa-mir-574_5p | ENSG00000131089 | ARHGEF9    |
| hsa-mir-574_5p | ENSG00000148516 | ZEB1       |
| hsa-mir-574_5p | ENSG00000155833 | CYLC2      |
| hsa-mir-574_5p | ENSG00000171310 | CHST11     |
| hsa-mir-574_5p | ENSG00000168952 | STXBP6     |
| hsa-mir-574_5p | ENSG00000166025 | AMOTL1     |
| hsa-mir-574_5p | ENSG00000017427 | IGF1       |
| hsa-mir-574_5p | ENSG00000102781 | KATNAL1    |
| hsa-mir-574_5p | ENSG00000157064 | NMNAT2     |
| hsa-mir-574_5p | ENSG00000223474 | AL020996.1 |
| hsa-mir-574_5p | ENSG00000127328 | RAB3IP     |
| hsa-mir-574_5p | ENSG00000179915 | NRXN1      |
| hsa-mir-574_5p | ENSG00000182158 | CREB3L2    |
| hsa-mir-574_5p | ENSG00000122367 | LDB3       |
| hsa-mir-574_5p | ENSG00000172992 | DCAKD      |
| hsa-mir-574_5p | ENSG00000126351 | THRA       |
| hsa-mir-574_5p | ENSG00000183826 | BTBD9      |
| hsa-mir-574_5p | ENSG00000128891 | C15orf57   |
| hsa-mir-574_5p | ENSG00000170471 | RALGAPB    |
| hsa-mir-574_5p | ENSG00000196092 | PAX5       |
| hsa-mir-574_5p | ENSG00000136521 | NDUFB5     |
| hsa-mir-574_5p | ENSG00000089169 | RPH3A      |
| hsa-mir-574_5p | ENSG00000073050 | XRCC1      |
| hsa-mir-574_5p | ENSG00000053254 | FOXN3      |
| hsa-mir-574_5p | ENSG00000102858 | MGRN1      |
| hsa-mir-574_5p | ENSG00000101938 | CHRD1      |
| hsa-mir-574_5p | ENSG00000169967 | MAP3K2     |
| hsa-mir-574_5p | ENSG00000102781 | KATNAL1    |
| hsa-mir-574_5p | ENSG00000170471 | RALGAPB    |
| hsa-mir-574_5p | ENSG00000157064 | NMNAT2     |
| hsa-mir-574_5p | ENSG00000145864 | GABRB2     |
| hsa-mir-574_5p | ENSG00000196092 | PAX5       |
| hsa-mir-574_5p | ENSG00000166159 | LRTM2      |
| hsa-mir-574_5p | ENSG00000186439 | TRDN       |

|                |                 |            |
|----------------|-----------------|------------|
| hsa-mir-574_5p | ENSG00000012124 | CD22       |
| hsa-mir-574_5p | ENSG00000186439 | TRDN       |
| hsa-mir-574_5p | ENSG00000155966 | AFF2       |
| hsa-mir-574_5p | ENSG00000156269 | NAA11      |
| hsa-mir-574_5p | ENSG00000145864 | GABRB2     |
| hsa-mir-574_5p | ENSG00000168952 | STXBP6     |
| hsa-mir-574_5p | ENSG00000172992 | DCAKD      |
| hsa-mir-574_5p | ENSG00000223474 | AL020996.1 |
| hsa-mir-574_5p | ENSG00000183826 | BTBD9      |
| hsa-mir-574_5p | ENSG00000053254 | FOXN3      |
| hsa-mir-574_5p | ENSG00000145864 | GABRB2     |
| hsa-mir-574_5p | ENSG00000012124 | CD22       |
| hsa-mir-574_5p | ENSG00000012124 | CD22       |
| hsa-mir-574_5p | ENSG00000012124 | CD22       |
| hsa-mir-574_5p | ENSG00000155966 | AFF2       |
| hsa-mir-574_5p | ENSG00000155966 | AFF2       |
| hsa-mir-574_5p | ENSG00000102781 | KATNAL1    |
| hsa-mir-574_5p | ENSG00000156269 | NAA11      |
| hsa-mir-574_5p | ENSG00000223474 | AL020996.1 |
| hsa-mir-574_5p | ENSG00000183826 | BTBD9      |
| hsa-mir-574_5p | ENSG00000179915 | NRXN1      |
| hsa-mir-574_5p | LRG_141         | CD40LG     |
| hsa-mir-579    | ENSG00000100483 | METTTL21D  |
| hsa-mir-582_3p | ENSG00000126261 | UBA2       |
| hsa-mir-582_5p | ENSG00000170365 | SMAD1      |
| hsa-mir-582_5p | ENSG00000107679 | PLEKHA1    |
| hsa-mir-582_5p | ENSG00000131773 | KHDRBS3    |
| hsa-mir-584_5p | ENSG00000056558 | TRAF1      |
| hsa-mir-598    | ENSG00000147174 | ACRC       |
| hsa-mir-598    | ENSG00000092969 | TGFB2      |
| hsa-mir-601    | ENSG00000079102 | RUNX1T1    |
| hsa-mir-601    | ENSG00000079102 | RUNX1T1    |
| hsa-mir-603    | ENSG00000215020 | AL591684.1 |
| hsa-mir-603    | ENSG00000215033 | AL603965.1 |
| hsa-mir-603    | ENSG00000116205 | TCEANC2    |
| hsa-mir-603    | ENSG00000004468 | CD38       |

|                |                 |          |
|----------------|-----------------|----------|
| hsa-mir-603    | ENSG00000226264 | HLA-DMB  |
| hsa-mir-603    | ENSG00000183908 | LRRC55   |
| hsa-mir-603    | ENSG00000184040 | FAM23B.1 |
| hsa-mir-603    | ENSG00000148483 | TMEM236  |
| hsa-mir-603    | ENSG00000132623 | ANKRD5   |
| hsa-mir-603    | ENSG00000144455 | SUMF1    |
| hsa-mir-603    | ENSG00000122692 | SMU1     |
| hsa-mir-603    | ENSG00000102781 | KATNAL1  |
| hsa-mir-616_5p | ENSG00000204856 | C12orf24 |
| hsa-mir-620    | ENSG00000106591 | MRPL32   |
| hsa-mir-625_5p | ENSG00000145779 | TNFAIP8  |
| hsa-mir-638    | ENSG00000068024 | HDAC4    |
| hsa-mir-644a   | ENSG00000071242 | RPS6KA2  |
| hsa-mir-645    | ENSG00000163263 | C1orf189 |
| hsa-mir-652_5p | ENSG00000128159 | TUBGCP6  |
| hsa-mir-708_5p | ENSG00000156795 | WDYHV1   |
| hsa-mir-708_5p | ENSG00000053438 | NNAT     |
| hsa-mir-708_5p | ENSG00000152578 | GRIA4    |
| hsa-mir-708_5p | ENSG00000125484 | GTF3C4   |
| hsa-mir-708_5p | ENSG00000186432 | KPNA4    |
| hsa-mir-708_5p | ENSG00000159140 | SON      |
| hsa-mir-708_5p | ENSG00000164741 | DLC1     |
| hsa-mir-708_5p | ENSG00000122741 | DCAF10   |
| hsa-mir-708_5p | ENSG00000144043 | TEX261   |
| hsa-mir-708_5p | ENSG00000144401 | METTL21A |
| hsa-mir-708_5p | ENSG00000136868 | SLC31A1  |
| hsa-mir-708_5p | ENSG00000116641 | DOCK7    |
| hsa-mir-708_5p | ENSG00000129472 | RAB2B    |
| hsa-mir-7-1_5p | ENSG00000185697 | MYBL1    |
| hsa-mir-7-1_5p | ENSG00000214642 | DEFB113  |
| hsa-mir-7-1_5p | ENSG00000127804 | METTL16  |
| hsa-mir-720    | ENSG00000125046 | C3orf32  |
| hsa-mir-720    | ENSG00000125046 | C3orf32  |
| hsa-mir-762    | ENSG00000005884 | ITGA3    |
| hsa-mir-762    | ENSG00000006652 | IFRD1    |
| hsa-mir-762    | ENSG00000090539 | CHRD     |

|             |                 |          |
|-------------|-----------------|----------|
| hsa-mir-762 | ENSG00000090539 | CHRD     |
| hsa-mir-762 | ENSG00000099385 | BCL7C    |
| hsa-mir-762 | ENSG00000101180 | HRH3     |
| hsa-mir-762 | ENSG00000101180 | HRH3     |
| hsa-mir-762 | ENSG00000105251 | SHD      |
| hsa-mir-762 | ENSG00000107829 | FBXW4    |
| hsa-mir-762 | ENSG00000149485 | FADS1    |
| hsa-mir-762 | ENSG00000161281 | COX7A1   |
| hsa-mir-762 | ENSG00000163659 | TIPARP   |
| hsa-mir-762 | ENSG00000174498 | IGDCC3   |
| hsa-mir-762 | ENSG00000174775 | HRAS     |
| hsa-mir-762 | ENSG00000177830 | CHID1    |
| hsa-mir-762 | ENSG00000183117 | CSMD1    |
| hsa-mir-762 | ENSG00000129757 | CDKN1C   |
| hsa-mir-762 | ENSG00000169221 | TBC1D10B |
| hsa-mir-762 | ENSG00000169221 | TBC1D10B |
| hsa-mir-762 | ENSG00000130052 | STARD8   |
| hsa-mir-762 | ENSG00000130052 | STARD8   |
| hsa-mir-762 | ENSG00000130052 | STARD8   |
| hsa-mir-762 | ENSG00000106624 | AEBP1    |
| hsa-mir-762 | ENSG00000121274 | PAPD5    |
| hsa-mir-762 | ENSG00000130699 | TAF4     |
| hsa-mir-762 | ENSG00000130699 | TAF4     |
| hsa-mir-762 | ENSG00000198648 | STK39    |
| hsa-mir-762 | ENSG00000140564 | FURIN    |
| hsa-mir-762 | ENSG00000130052 | STARD8   |
| hsa-mir-762 | ENSG00000140564 | FURIN    |
| hsa-mir-762 | ENSG00000130052 | STARD8   |
| hsa-mir-762 | ENSG00000130052 | STARD8   |
| hsa-mir-935 | ENSG00000142453 | CARM1    |

human miRs. “Transposable Element” refers to the TE a miR was initially formed from as described in RepBase<sup>42,43</sup>. All TE  
 ers (e.g. “RF00026 U6” or “RF00100 7SK”) which refer to RFAM<sup>46, 47</sup>. “miR Sequence Hit” refers to the miR nucleotides ali  
 refers to the location of a predicted target site within a given mRNA. “miR Name” refers to miRBase<sup>2</sup> annotation while “Ense  
 ning utility<sup>37</sup>. In the instance of multiple hits by an individual miR within a single transcript, only the best alignment is show

| Transposable Element                                          | miR Sequence Hit         |
|---------------------------------------------------------------|--------------------------|
| MER52A                                                        | CTGCAGTGGGGGAG           |
| MER52A                                                        | TGCCAGCTGCAGTGG          |
| MER52A                                                        | CAGCTGCAGTGGGGGAG        |
| MER52A                                                        | GTGCCAGCTGCAG            |
| MER52A                                                        | GTGCCAGCTGCAG            |
| MER52A                                                        | GTGCCAGCTGCAGTGGGGGA     |
| MER52A                                                        | CCAGCTGCAGTGGGGG         |
| MER52A                                                        | GTGCCAGCTGCAGTGGGGGA     |
| LTR9_OG_ERV3_Otolemur_garnettii                               | CCTCCTCTCTCCTCAG         |
| LTR9_OG_ERV3_Otolemur_garnettii                               | CCTCCTCTCTCCTCAG         |
| LTR9_OG_ERV3_Otolemur_garnettii                               | CCTCCTCTCTCCTCAG         |
| LTR9_OG_ERV3_Otolemur_garnettii                               | CACCTCCTCTCTCCTCA        |
| LTR9_OG_ERV3_Otolemur_garnettii                               | ACTCGGGAGGTGG            |
| LTR9_OG_ERV3_Otolemur_garnettii                               | CTCGGGAGGTGG             |
| NonLTR_5_CR_Non_LTR_Retrotransposon_Chlamydomonas_reinhardtii | CCCTTTTCCCCAG            |
| NonLTR_5_CR_Non_LTR_Retrotransposon_Chlamydomonas_reinhardtii | CCCTTTTCCCCAG            |
| NonLTR_5_CR_Non_LTR_Retrotransposon_Chlamydomonas_reinhardtii | CCCTTTTCCCCAG            |
| NonLTR_5_CR_Non_LTR_Retrotransposon_Chlamydomonas_reinhardtii | CCACCCTTTTCCCCA          |
| L1-2_TS                                                       | GTGTCTGGGCGGA            |
| MLT1M                                                         | TTTTGGAGCAGG             |
| MLT1M                                                         | TGGATTTTTGGAGCAGG        |
| MLT1M                                                         | TTTTTGGAGCAGG            |
| MLT1M                                                         | AATGGATTTTTGGAG          |
| MLT1M                                                         | AATGGATTTTTGGA           |
| MLT1M                                                         | TGGATTTTTGGAGCAGG        |
| L2B_CR1_Eutheria                                              | CTTCCCCCCTTCTTCA         |
| L2B_CR1_Eutheria                                              | CCCCCTTCTTCA             |
| AluJr                                                         | AGCCTGGAAGCTGGAGCCTGCAGT |
| AluJr                                                         | GGAGCCTGCAGT             |

|                                         |                          |
|-----------------------------------------|--------------------------|
| AluJr                                   | AGCCTGGAAGCTGGAGCCTGCAGT |
| AluJr                                   | GAAGCTGGAGCCTGCAG        |
| TIGGER1                                 | GGATGAGCAAAGAAA          |
| TIGGER1                                 | GGATGAGCAAAGAAAGTAG      |
| TIGGER1                                 | AACCACTTTCTTTGCTCATCC    |
| TIGGER1                                 | AACCACTTTCTTTGCTCATCCA   |
| TIGGER1                                 | AACCACTTTCTTT            |
| TIGGER1                                 | AACCACTTTCTTTGCTCATCCA   |
| TIGGER1                                 | AACCACTTTCTTTGCTCATCCA   |
| TIGGER1                                 | AGGCATTGACTTCTC          |
| TIGGER1                                 | AGGCATTGACTTCTCAC        |
| Gypsy-50_GA-LTR                         | ATCCCACCACTGCCACCAT      |
| TIGGER1                                 | TGGATAAGGCTTTGGCTT       |
| MER34C_EC                               | TGGCATACTGAGT            |
| MSTA                                    | TGTTGAAGTGAATCCCCA       |
| MSTA                                    | TGTTGAAGTGAATCCCCA       |
| MSTA                                    | TTGAAGTGAATCCCCA         |
| MSTA                                    | TGTTGAAGTGAATCCCCA       |
| MSTA                                    | TTGAAGTGAATCCCCA         |
| MSTA                                    | GTTGAAGTGAATCCCCA        |
| AluYc2_Repetitive_sequence_Homo_sapiens | GGGCGTGGTGGT             |
| AluYc2_Repetitive_sequence_Homo_sapiens | CGGGCGTGGTGGTGGG         |
| AluYc2_Repetitive_sequence_Homo_sapiens | GGGCGTGGTGGTG            |
| AluYc2_Repetitive_sequence_Homo_sapiens | GGCGTGGTGGTG             |
| AluYc2_Repetitive_sequence_Homo_sapiens | CGGGCGTGGTGGTGGG         |
| AluYc2_Repetitive_sequence_Homo_sapiens | CGTGGTGGTGGG             |
| AluYc2_Repetitive_sequence_Homo_sapiens | CGGGCGTGGTGGTGGG         |
| AluYc2_Repetitive_sequence_Homo_sapiens | CGGGCGTGGTGG             |
| AluYc2_Repetitive_sequence_Homo_sapiens | GGCGTGGTGGTG             |
| AluYc2_Repetitive_sequence_Homo_sapiens | CGGGCGTGGTGGTGGG         |
| AluYc2_Repetitive_sequence_Homo_sapiens | GGGCGTGGTGGTGGG          |
| AluYc2_Repetitive_sequence_Homo_sapiens | CGGGCGTGGTGGT            |



|                                         |                        |
|-----------------------------------------|------------------------|
| AluYc2_Repetitive_sequence_Homo_sapiens | CGGGCGTGGTGG           |
| AluYc2_Repetitive_sequence_Homo_sapiens | CGGGCGTGGTGG           |
| AluYc2_Repetitive_sequence_Homo_sapiens | CGGGCGTGGTGGTGGG       |
| AluYc2_Repetitive_sequence_Homo_sapiens | GGCGTGGTGGTGGG         |
| AluYc2_Repetitive_sequence_Homo_sapiens | GGGCGTGGTGGTG          |
| AluYc2_Repetitive_sequence_Homo_sapiens | CGGGCGTGGTGGT          |
| AluYc2_Repetitive_sequence_Homo_sapiens | GGCGTGGTGGTGGG         |
| AluYc2_Repetitive_sequence_Homo_sapiens | GGCGTGGTGGTGGG         |
| AluYc2_Repetitive_sequence_Homo_sapiens | GGGCGTGGTGGTG          |
| AluYc2_Repetitive_sequence_Homo_sapiens | GGGCGTGGTGGTGGG        |
| AluYc2_Repetitive_sequence_Homo_sapiens | CGGGCGTGGTGGTGGG       |
| MLT2B3                                  | CTGGACTGAGCCGTGCT      |
| MLT2B3                                  | ACTGAGCCGTGCT          |
| L2B                                     | CCTGCTATGTGCCAGG       |
| L2B                                     | CTGCTATGTGCCAGGCA      |
| L2B                                     | CTATGTGCCAGGCA         |
| L2B                                     | CTATGTGCCAGGCA         |
| L2B                                     | CTATGTGCCAGGCA         |
| L2B                                     | AGTGCCTGCTATGTGCC      |
| L2B                                     | AGTGCCTGCTATGTGCCAGGCA |
| L2B                                     | AGTGCCTGCTATGTGCCAGGCA |
| L2B                                     | GCCTGCTATGTGCCAGGCA    |
| HERV70_I_MER67C_Homo_sapiens            | TGATGATGGCAGCA         |
| HERV70_I_MER67C_Homo_sapiens            | ATGATGGCAGCAA          |
| AluS                                    | GGCGACAAAGCAAGACTC     |
| AluS                                    | GGGCGACAAAGCAAGACTCT   |
| AluS                                    | GACAAAGCAAGACTCT       |
| AluS                                    | GGGCGACAAAGCAAGA       |
| AluS                                    | GGGCGACAAAGCAAGACTC    |
| AluS                                    | GGCGACAAAGCAAGA        |
| AluS                                    | GGGCGACAAAGCAAGACTC    |
| AluS                                    | GACAAAGCAAGACTCT       |
| AluS                                    | GGGCGACAAAGCAAGACT     |

|       |                        |
|-------|------------------------|
| AluS  | GACAAAGCAAGACTCT       |
| AluS  | GGGCGACAAAGCAAGACTCT   |
| AluS  | GGCGACAAAGCAAGACTC     |
| AluS  | GACAAAGCAAGAC          |
| AluS  | GACAAAGCAAGACTCT       |
| AluS  | GACAAAGCAAGACTCT       |
| AluS  | GGGCGACAAAGCAAGACTCT   |
| AluS  | GGGCGACAAAGCAAGACTCT   |
| AluS  | GACAAAGCAAGACTCTTTCT   |
| AluS  | GGGCGACAAAGCAAGACTCT   |
| AluS  | GCGACAAAGCAAGACTC      |
| AluS  | GGGCGACAAAGCAAGACT     |
| AluS  | GACAAAGCAAGACTCT       |
| AluS  | GACAAAGCAAGACTCT       |
| AluS  | CGACAAAGCAAGACTC       |
| AluS  | GACAAAGCAAGACTCT       |
| AluS  | GGGCGACAAAGCAAGACTCTTT |
| AluS  | GGGCGACAAAGCAAGACTCT   |
| AluS  | GGGCGACAAAGCAAGACTC    |
| AluS  | GGGCGACAAAGCAAGACTC    |
| AluS  | GGGCGACAAAGCAAGACTCT   |
| AluS  | GGGCGACAAAGCAAGACTCT   |
| AluS  | GACAAAGCAAGACTCT       |
| AluS  | GGGCGACAAAGCAAGACT     |
| AluS  | GGGCGACAAAGCAAGACT     |
| AluS  | GGCGACAAAGCAAGACTC     |
| AluS  | GGGCGACAAAGCAAGACTC    |
| AluS  | GGGCGACAAAGCAAGACTC    |
| AluS  | GACAAAGCAAGACTC        |
| AluS  | GGGCGACAAAGCAAGAC      |
| AluS  | GGGCGACAAAGCAAGACTC    |
| AluS  | GGGCGACAAAGCAAGACTC    |
| AluS  | GGGCGACAAAGCAAGACTCT   |
| AluS  | GGCGACAAAGCAAGACT      |
| AluJ  | CGAGACCCTGTC           |
| AluSq | GAGGTTGAGGCT           |











|       |                       |
|-------|-----------------------|
| AluJ  | TTGTTGCCCAGG          |
| AluJ  | TCTCACTTTGTTGCCCAG    |
| AluJ  | TCTCACTTTGTTGCCCAGG   |
| AluJ  | TTTGTGCCCAGG          |
| AluJ  | TTGTTGCCCAGG          |
| AluJ  | GATCTCACTTTGTTGCCCAGG |
| AluJ  | TTGTTGCCCAGG          |
| AluJ  | ATCTCACTTTGTTGCCCAGG  |
| AluJ  | TCTCACTTTGTTGCCCA     |
| AluJ  | TCTCACTTTGTTGCCCAGG   |
| AluJ  | CTTTGTTGCCCAGG        |
| AluJ  | TCTCACTTTGTTGCCCAGG   |
| AluJ  | TCTCACTTTGTTGCCCAGG   |
| AluJ  | CTCACTTTGTTGCCCAGG    |
| AluJ  | TCTCACTTTGTTGCCCAGG   |
| AluJ  | GATCTCACTTTGTTGCCCAGG |
| AluJ  | GATCTCACTTTGTTGCCCA   |
| AluJb | CTGGGCAACAAAGTGAGACC  |
| AluJb | CTGGGCAACAAAGTGAG     |
| AluJb | GCAACAAAGTGAGACC      |
| AluJb | CTGGGCAACAAAGTGAGAC   |
| AluJb | TGGGCAACAAAGTGAGA     |
| AluJb | CTGGGCAACAAAGTGAGA    |
| AluJb | TCTGGGCAACAAAGTGAGAC  |
| AluJb | CTGGGCAACAAAGTGAGACC  |
| AluJb | TCTGGGCAACAAAGTGAGACC |
| AluJb | CTGGGCAACAAAGTGAGAC   |
| AluJb | CTGGGCAACAAAGTGAGACCT |
| AluJb | CTGGGCAACAAAGTGAGACC  |
| AluJb | CTGGGCAACAAAGTGAGACC  |
| MER5A | TGGAGTCCAGGA          |
| MER5A | GAATCTGCATTTT         |
| MER5A | TGGAGTCCAGGAATC       |





|                                        |                       |
|----------------------------------------|-----------------------|
| MIRc                                   | CAGGGAGGTGAATGT       |
| L2_Platt1o/MdoRep1_SINE_Metatheria     | GAAGCTCCTTGAGG        |
| L2_Platt1o/MdoRep1_SINE_Metatheria     | AGGAGCTCACAG          |
| L2_Platt1o/MdoRep1_SINE_Metatheria     | GAGGAGCTCACAGTCTAGT   |
| L2_Platt1o/MdoRep1_SINE_Metatheria     | TCGAGGAGCTCACAGTCTAGT |
| L2_Platt1o/MdoRep1_SINE_Metatheria     | AGGAGCTCACAGTCTAGT    |
| L2_Platt1o/MdoRep1_SINE_Metatheria     | GGAGCTCACAGTCT        |
| L2_Platt1o/MdoRep1_SINE_Metatheria     | AGGAGCTCACAGTCT       |
| L2_Platt1o/MdoRep1_SINE_Metatheria     | GGAGCTCACAGTCTAG      |
| L2_Platt1o/MdoRep1_SINE_Metatheria     | CGAGGAGCTCACAGTCTAG   |
| L2_Platt1o/MdoRep1_SINE_Metatheria     | AGGAGCTCACAGTCTAGT    |
| L2_Platt1o/MdoRep1_SINE_Metatheria     | AGGAGCTCACAGTCTAGT    |
| L2_Platt1o/MdoRep1_SINE_Metatheria     | GAGCTCACAGTCTAGT      |
| L2_Platt1o/MdoRep1_SINE_Metatheria     | TCGAGGAGCTCACAGTCTAGT |
| L2_Platt1o/MdoRep1_SINE_Metatheria     | AGGAGCTCACAGTCTA      |
| L2_Platt1o/MdoRep1_SINE_Metatheria     | AGGAGCTCACAGTCTA      |
| AAYZ01253455.1_1930x1824_RF00026_U6    | CTGTGCTGCTGA          |
| AAYZ01253455.1_1930x1824_RF00026_U6    | CCAGTATTAACT          |
| AAYZ01253455.1_1930x1824_RF00026_U6    | CCAGTATTAACT          |
| AAYZ01253455.1_1930x1824_RF00026_U6    | AACTGTGCTGCTGA        |
| AAYZ01253455.1_1930x1824_RF00026_U6    | AACTGTGCTGCTG         |
| AAYZ01253455.1_1930x1824_RF00026_U6    | AACTGTGCTGCTGA        |
| LTR16_FC                               | CCCTCCGCTGCTGCCA      |
| LTR16_FC                               | CCCCCTCCGCTGCTGCC     |
| CLOXA_CS_DNA_binding_protein_Canis_sp. | GGGCGACGCGGCGGG       |
| CLOXA_CS_DNA_binding_protein_Canis_sp. | AGGGCGACGCGG          |
| CLOXA_CS_DNA_binding_protein_Canis_sp. | CCCCAGGGCGAC          |
| CLOXA_CS_DNA_binding_protein_Canis_sp. | CCCCAGGGCGACGCGGCGG   |
| CLOXA_CS_DNA_binding_protein_Canis_sp. | GGGCGACGCGGCG         |
| CLOXA_CS_DNA_binding_protein_Canis_sp. | CTTGCTTGCTGCC         |
| CLOXA_CS_DNA_binding_protein_Canis_sp. | TGCCTTGCTGCCCGG       |
| CLOXA_CS_DNA_binding_protein_Canis_sp. | GCTGCCCGGGCC          |
| CLOXA_CS_DNA_binding_protein_Canis_sp. | CTTGCTTGCTGCC         |
| CLOXA_CS_DNA_binding_protein_Canis_sp. | GCTGCCCGGGCC          |
| AANU01178229.1_7254x6952_RF00100_7SK   | CAGGCCAGGCACAGTGGCTCA |
| AANU01178229.1_7254x6952_RF00100_7SK   | GGCCAGGCACAGTGGCTCA   |







AANU01178229.1\_7254x6952\_RF00100\_7SK  
AANU01178229.1\_7254x6952\_RF00100\_7SK  
AANU01178229.1\_7254x6952\_RF00100\_7SK  
AANU01178229.1\_7254x6952\_RF00100\_7SK  
AANU01178229.1\_7254x6952\_RF00100\_7SK  
AANU01178229.1\_7254x6952\_RF00100\_7SK

EnSpm2\_SB\_EnSpm\_Sorghum\_bicolor  
EnSpm2\_SB\_EnSpm\_Sorghum\_bicolor  
EnSpm2\_SB\_EnSpm\_Sorghum\_bicolor  
EnSpm2\_SB\_EnSpm\_Sorghum\_bicolor  
EnSpm2\_SB\_EnSpm\_Sorghum\_bicolor  
EnSpm2\_SB\_EnSpm\_Sorghum\_bicolor  
EnSpm2\_SB\_EnSpm\_Sorghum\_bicolor  
EnSpm2\_SB\_EnSpm\_Sorghum\_bicolor

L2\_Platt1o  
L2\_Platt1o

ERV1\_N6\_I\_DR\_ERV1\_Danio\_riero  
ERV1\_N6\_I\_DR\_ERV1\_Danio\_riero  
ERV1\_N6\_I\_DR\_ERV1\_Danio\_riero  
ERV1\_N6\_I\_DR\_ERV1\_Danio\_riero

LINE1-21\_ZM  
LINE1-21\_ZM

AGGCCAGGCACAGTGGCTCA  
AGGCCAGGCACAGTGGCTCA  
AGGCCAGGCACAGTGGCTCA  
AGGCCAGGCACAGTGGCTCA  
GGCCAGGCACAGTGGCTCA  
AGGCCAGGCACAGTGGCTCA  
TAATATAAATTTAA  
AAATTTAATTTATT  
AATATAAATTTAAT  
TAAATTTAATTT  
TATAAATTTAATTTATT  
ATAAATTTAATTTAT  
TATAAATTTAATTTA  
CTGTAATATAAATTTA  
CTAGATTGTGAGCTCCT  
AAGGAGCTCACAG  
AGCTCACAGTCTA  
GGAGCTCACAGTCT  
AAGGAGCTCACAGTCT  
AAGGAGCTCACAGTCTA  
AAGGAGCTCACAGTCTA  
AAGGAGCTCACAGTCTA  
GGAGCTCACAGTCTA  
AGGAGCTCACAGTCTA  
AGGAGCTCACAGTCTA  
AGGAGCTCACAGTCTA  
AAGGAGCTCACAGTCTA  
AAGGAGCTCACAGTCTA  
AAGGAGCTCACAGTCTA  
AAGGAGCTCACAGTCTA  
AAGGAGCTCACAGTCTA  
ATGTATGTGTGCAT  
TGTATGTGTGCATGTGC  
TGTATGTGTGCATGTG  
ATGTATGTGTGCATG  
GCTCTGACTTTATT  
GCTCTGACTTTATTG

|                                           |                         |
|-------------------------------------------|-------------------------|
| LINE1-21_ZM                               | CTCTGACTTTATTG          |
| LINE1-21_ZM                               | GCTCTGACTTTATT          |
| LINE1-21_ZM                               | TGACTTTATTGCA           |
| THER1_SINE_Mammalia                       | TGCTTCCATGTT            |
| THER1_SINE_Mammalia                       | CTTAAACGTGGAT           |
| THER1_SINE_Mammalia                       | AACGTGGATGTACTT         |
| THER1_SINE_Mammalia                       | TGCTTCCATGTT            |
| THER1_SINE_Mammalia                       | CTTTAACATGGAAGT         |
| THER1_SINE_Mammalia                       | ACTTTAACATGGA           |
| THER1_SINE_Mammalia                       | TGCTTCCATGTT            |
| THER1_SINE_Mammalia                       | CCATGTTTCAGTGG          |
| THER1_SINE_Mammalia                       | GGGGGTACCTGCTG          |
| THER1_SINE_Mammalia                       | TGGGGGTACCTGC           |
| THER1_SINE_Mammalia                       | GGGGGTACCTGCTG          |
| THER1_SINE_Mammalia                       | ACTTTAACATGGAG          |
| THER1_SINE_Mammalia                       | TGCTTCCATGCTT           |
| THER1_SINE_Mammalia                       | TGCTTCCATGCTT           |
| THER1_SINE_Mammalia                       | AATTGCTTCCATGTTT        |
| THER1_SINE_Mammalia                       | ATTGCTTCCATGTTT         |
| L1PA13_5                                  | TGTGACTGCATTATGAAAATTCT |
| L1MC3                                     | TAAAGAACTCTTAAAACCCAAT  |
| L1PB1                                     | GGATAAAAGACTACATATT     |
| L1PB1                                     | GGATAAAAGACTACA         |
| Alu2_TS                                   | AGGCTGAGACTGCAGTG       |
| GOLEM                                     | TGGGAGCAATGGGGT         |
| GOLEM                                     | TGTAGCCTGGGAGCAAT       |
| COPIA1-LTR_LC                             | AGGCCTTTCTGAACCT        |
| Chapaev_8_HM_Chapaev_Hydra_magnipapillata | ATGTGTGTGTAT            |
| Chapaev_8_HM_Chapaev_Hydra_magnipapillata | ATGTGTGTGTAT            |
| Chapaev_8_HM_Chapaev_Hydra_magnipapillata | TATGTGTGTGTAT           |
| Chapaev_8_HM_Chapaev_Hydra_magnipapillata | ATATGTGTGTGT            |

|                                           |                     |
|-------------------------------------------|---------------------|
| Chapaev_8_HM_Chapaev_Hydra_magnipapillata | ATATGTGTGTGT        |
| Chapaev_8_HM_Chapaev_Hydra_magnipapillata | GATATGTGTGTGT       |
| Chapaev_8_HM_Chapaev_Hydra_magnipapillata | TATGGATATGTGTGTGTAT |
| Chapaev_8_HM_Chapaev_Hydra_magnipapillata | TGTATGGATATGTGTGTGT |
| Chapaev_8_HM_Chapaev_Hydra_magnipapillata | TATGTGTGTGTAT       |
| Chapaev_8_HM_Chapaev_Hydra_magnipapillata | ATATGTGTGTGTAT      |
| GRANDE1_ZD_I                              | CTGGGGAGATCC        |
| GRANDE1_ZD_I                              | TCCTCGAGGTTGG       |
| GRANDE1_ZD_I                              | CTGGGGAGATCCTC      |
| GRANDE1_ZD_I                              | AGGATCTCCCCAGC      |
| MurSatRep1                                | GGATTACAAGTGT       |
| MER6B                                     | TGTGACTTTAAGGG      |
| MuDR_1_NV_MuDR_Nematostella_vectensis     | GGAATCTGTATATAT     |
| MuDR_1_NV_MuDR_Nematostella_vectensis     | TATGGAATCTGTAT      |
| MuDR_1_NV_MuDR_Nematostella_vectensis     | TATGGAATCTGTAT      |
| TguERVK1N3_I_ERV2_Estrildidae             | GCCGGGCCCCGGG       |
| TguERVK1N3_I_ERV2_Estrildidae             | GCGCCGGGCCCC        |
| TguERVK1N3_I_ERV2_Estrildidae             | CGCGCCGGGCCCC       |
| TguERVK1N3_I_ERV2_Estrildidae             | CGCGCCGGGCCCCGGGTT  |
| LTR16D2                                   | GCTACTCAGGTCTG      |
| LTR16D2                                   | CTACTCAGGTCTG       |
| LINE2_Non_LTR_retrotransposon_Eutheria    | TAGGTGTCCAGTAA      |
| LINE2_Non_LTR_retrotransposon_Eutheria    | TAGGTGTCCAGTAA      |
| hATm_28_HM_hAT_Hydra_magnipapillata       | ACACACCTGGTTAAC     |
| MARNA                                     | GTCTCAGTTACTTT      |
| MARNA                                     | AGCAATGAGACTGAT     |
| MARNA                                     | TTATAAAGCAATGAG     |
| MARNA                                     | TTATAAAGCAATGA      |
| MamSINE1                                  | TCTCACACAGAAAT      |
| MIR3                                      | ACTCCTAGTCCAGGGCTC  |
| MER44C_Mariner_Tc1_Homo_sapiens           | AAAGAAATTCTT        |



|                                                       |                       |
|-------------------------------------------------------|-----------------------|
| Copia_53_SB_I_Copia_Sorghum_bicolor                   | CACCCTGCATCCCGCACC    |
| Copia_53_SB_I_Copia_Sorghum_bicolor                   | ATCCCGCACCCAG         |
| Copia_53_SB_I_Copia_Sorghum_bicolor                   | CCCTGCATCCCGCACC      |
| SETARIA1                                              | CGGGGATCGCCGAGG       |
| SETARIA1                                              | CGCGGGGATCGCCGAGGG    |
| Copia-8_TA-I                                          | AGCAGGTGCGGGGCGGCCG   |
| DNA_2_12_DR_DNA_transposon_Danio_rerio                | ATGGAATGTATATACGGAATA |
| tRNA-Thr-ACY_                                         | TGTTTCCCCCACG         |
| tRNA-Thr-ACY_                                         | GGAGATCCTGGGTT        |
| tRNA-Thr-ACY_                                         | AGGAGATCCTGGG         |
| MER96                                                 | TTGCATGACCCTGGGA      |
| L1MEC_5_L1M4_5_Eutheria                               | AGAGAAAAGTAAATGA      |
| L1MEC_5_L1M4_5_Eutheria                               | TAAGAGAAAAGTAAATGA    |
| Copia_131_SB_I_Copia_Sorghum_bicolor                  | AGGTGTGATATTGTGGT     |
| Copia_131_SB_I_Copia_Sorghum_bicolor                  | CTGGGAGGTGTGAT        |
| CER15_I_CE_LTR_Retrotransposon_Caenorhabditis_elegans | TAGAGGAAAATCCA        |
| CER15_I_CE_LTR_Retrotransposon_Caenorhabditis_elegans | ATCATAGAGGAA          |
| CER15_I_CE_LTR_Retrotransposon_Caenorhabditis_elegans | GGAAAATCCACGT         |
| CER15_I_CE_LTR_Retrotransposon_Caenorhabditis_elegans | AGGAAAATCCACGT        |
| CER15_I_CE_LTR_Retrotransposon_Caenorhabditis_elegans | ATCATAGAGGAAAATCC     |
| CER15_I_CE_LTR_Retrotransposon_Caenorhabditis_elegans | ATCATAGAGGAAAA        |
| CER15_I_CE_LTR_Retrotransposon_Caenorhabditis_elegans | CTTCTATGAGTA          |
| CER15_I_CE_LTR_Retrotransposon_Caenorhabditis_elegans | TCTCCTTCTATGAGT       |
| CER15_I_CE_LTR_Retrotransposon_Caenorhabditis_elegans | TAGAGGAAAATCCA        |
| CER15_I_CE_LTR_Retrotransposon_Caenorhabditis_elegans | AAAATCCATGTT          |
| CER15_I_CE_LTR_Retrotransposon_Caenorhabditis_elegans | ATCATAGAGGAA          |
| CER15_I_CE_LTR_Retrotransposon_Caenorhabditis_elegans | GAAAATCCATGTT         |
| CER15_I_CE_LTR_Retrotransposon_Caenorhabditis_elegans | GAAAATCCATGTT         |
| CER15_I_CE_LTR_Retrotransposon_Caenorhabditis_elegans | ATCATAGAGGAAAATCC     |
| CER15_I_CE_LTR_Retrotransposon_Caenorhabditis_elegans | ATCATAGAGGAAAA        |
| CER15_I_CE_LTR_Retrotransposon_Caenorhabditis_elegans | AACATAGAGGAAA         |
| CER15_I_CE_LTR_Retrotransposon_Caenorhabditis_elegans | CATAGAGGAAATTC        |
| MIRc                                                  | CTGGACTTGAGGCAGAA     |
| ABDC01224945.1_1546x1450_RF00019_Y_RNA                | AGAACAAAGGAC          |
| ABDC01224945.1_1546x1450_RF00019_Y_RNA                | AGAGAACAAAGG          |
| ABDC01224945.1_1546x1450_RF00019_Y_RNA                | AGAGAACAAAGGA         |

|                                           |                        |
|-------------------------------------------|------------------------|
| MIR                                       | GGAAACTGAGGCAG         |
| MIR                                       | GGAAACTGAGGCAG         |
| MIR                                       | GGTGTGGAAACTGAGGCA     |
| MIR                                       | GGAAACTGAGGCAG         |
| MIR                                       | GGAAACTGAGGCA          |
| MIR2_Repetitive_sequence_Mammalia         | TCAACAGACATT           |
| MIR2_Repetitive_sequence_Mammalia         | CAACAGACATTAA          |
| MIR2_Repetitive_sequence_Mammalia         | ATCAACAGACATT          |
| MIR2_Repetitive_sequence_Mammalia         | ATCAACAGACATTAATTG     |
| Gypsy154_I_DR_Gypsy_Danio_erio            | TGTTCTCTGTCT           |
| Ginger1_6_HM_Ginger1_Hydra_magnipapillata | TTTTGCGATGTGTTCT       |
| Ginger1_6_HM_Ginger1_Hydra_magnipapillata | ATTTTGCATTCAT          |
| Ginger1_6_HM_Ginger1_Hydra_magnipapillata | CATTTTGCATTCAT         |
| Ginger1_6_HM_Ginger1_Hydra_magnipapillata | TGTGTTCTAATAT          |
| Ginger1_6_HM_Ginger1_Hydra_magnipapillata | TTTGCGATGTGTTCC        |
| Ginger1_6_HM_Ginger1_Hydra_magnipapillata | TTTTGCAATATGT          |
| Ginger1_6_HM_Ginger1_Hydra_magnipapillata | TTTTGCAATATGTTCTGAATA  |
| CR1_79_HM_CR1_Hydra_magnipapillata        | ATACACATACAC           |
| L2B                                       | CTACTGTGTGCCAGG        |
| L2B                                       | CTACTGTGTGCCAGG        |
| L2B                                       | GTCTACTGTGTGCCAGG      |
| L2B                                       | TCTACTGTGTGCCAGG       |
| L2B                                       | GTACATGGTAGGCTTT       |
| L2B                                       | TTGTACATGGTA           |
| GYP50_I_Gypsy                             | TGTCCCTGGGTGAGA        |
| GYP50_I_Gypsy                             | TGTCCCTGGGTGAGA        |
| GYP50_I_Gypsy                             | TTGTCCCTGGGTG          |
| MER5A1                                    | ATTCTGCATTTTTAGCAAGTTC |
| MER5A1                                    | CATTTTTAGCAAGTT        |
| MER5A1                                    | TTTTTAGCAAGTTC         |
| MER5A1                                    | ATTCTGCATTTTTAGCAAGTTC |
| MER5A1                                    | CTGCATTTTTAGCAAGTT     |
| MER5A1                                    | CATTTTTAGCAAGT         |
| MER5A1                                    | ATTCTGCATTTTT          |
| MER5A1                                    | TTCTGCATTTTTAGCAA      |
| MER5A1                                    | TCTGCATTTTTAGCAAGTTC   |

|                                   |                        |
|-----------------------------------|------------------------|
| MER5A1                            | TTGTGCATTTCTAA         |
| MIR2_Repetitive_sequence_Mammalia | TAAATGTTTATTAGATGA     |
| MADE1                             | CAAAACTGGCAATTACTTTTGC |
| MADE1                             | CAATTACTTTTGC          |
| MADE1                             | GCAATTACTTTTGC         |
| MADE1                             | CAATTACTTTTGC          |
| MADE1                             | CAATTACTTTTGC          |
| MADE1                             | GCAATTACTTTTGC         |
| MADE1                             | CAATTACTTTTGC          |
| MADE1                             | CAATTACTTTTGC          |
| MADE1                             | GCAATTACTTTTGC         |
| MADE1                             | CAATTACTTTTGC          |
| MADE1                             | CAAAACTGGCAATTACTTTTGC |
| MADE1                             | CAATTACTTTTGC          |
| MADE1                             | GCAATTACTTTTGC         |
| MADE1                             | CAATTACTTTTGC          |
| MADE1                             | CAATTACTTTTGC          |
| MADE1                             | GCAATTACTTTTGC         |
| MADE1                             | GCAATTACTTTTGC         |
| MADE1                             | CAATTACTTTTGC          |
| MADE1                             | GCAATTACTTTTGC         |
| MADE1                             | GCAATTACTTTTGC         |
| MADE1                             | CAATTACTTTTGC          |
| MADE1                             | GCAATTACTTTTGC         |
| MADE1                             | GCAATTACTTTTGC         |







|       |                         |
|-------|-------------------------|
| MADE1 | AAAAACTGTAATTACTTTT     |
| MADE1 | AAAAACTGTAATTAC         |
| MADE1 | AAAAACTGTAATTAC         |
| MADE1 | AAAAACTGTAATTAC         |
| MADE1 | AAAAACTGTAATTACTTTT     |
| MADE1 | AAAAACTGTAATTACTTTT     |
| MADE1 | TAATTACTTTTGTAC         |
| MADE1 | AAAACTGTAATTACTTTTG     |
| MADE1 | AAAACTGTAATTACTTTTG     |
| MADE1 | TGCAAAAGTAATTGCAGTTTTT  |
| MADE1 | TGCAAAAGTAATTGCAGTTT    |
| MADE1 | TGCAAAAGTAATTGCAGTTTTTG |
| MADE1 | CAAAAGTAATTGCAGTTTTTG   |
| MADE1 | AAAAGTAATCGCGTTTTTG     |
| MADE1 | AAAAGTAATCGCGTTTTTG     |
| MADE1 | AAAAGTAATCGCGTTTTTG     |
| MADE1 | AAAAGTAATCGCGTTTTTGTC   |
| MADE1 | AAAAGTAATCGCGTTTTTGTC   |
| MADE1 | AAAAGTAATCGCGTTTTTG     |
| MADE1 | CAAAAACCGCAATTACTTTTGCA |

|       |                         |
|-------|-------------------------|
| MADE1 | AAAAACCGCAATTACTTTTGCA  |
| MADE1 | CAAAAACCGCAATTACTTTTGCA |
| MADE1 | AAAAGTAATCGCGGTTTTTGTC  |
| MADE1 | AAAAGTAATCGCGGTTTTTG    |
| MADE1 | AAAAGTAATCGCGGTTTTTG    |
| MADE1 | AAAAGTAATCGCGGTTTTTG    |
| MADE1 | AAAAGTAATTGCGGATTTTG    |
| MADE1 | AAAAGTAATTGCGG          |
| MADE1 | AAAAGTAATTGCGGATTTTGC   |
| MADE1 | AAAAGTAATTGCGGATTTTGC   |
| MADE1 | AAAAGTAATTGCGGATTTTGCC  |
| MADE1 | AAAAGTAATTGCGGATTTTG    |
| MADE1 | AAAAGTAATTGCGG          |
| MADE1 | AAAAGTAATTGCGGATTTTGC   |
| MADE1 | AAAAGTAATTGCGGATTTTGC   |
| MADE1 | AAAAGTAATTGCGGATTTTGCC  |
| MADE1 | AAAAGTAATTGCGGATTTTGCC  |
| MADE1 | AAAAGTAATTGCGGATTTTGCC  |
| MADE1 | AAAAGTAATTGCGGATTTTG    |
| MADE1 | AAAAGTAATTGCGG          |
| MADE1 | AAAAGTAATTGCGGATTTTGC   |
| MADE1 | AAAAGTAATTGCGGATTTTGC   |
| MADE1 | AAAAGTAATTGCGGATTTTGCC  |
| MADE1 | AAAAGTAATTGCGGATTTTGCC  |
| MADE1 | AAAAGTAATTGCGGATTTTGCC  |







|       |                          |
|-------|--------------------------|
| MADE1 | CAATTACTTTTGC            |
| MADE1 | CAATTACTTTTGC            |
| MADE1 | CAATTACTTTTGC            |
| MADE1 | TTACTTTTGCACCA           |
| MADE1 | ACAGTTACTTTTGCACCA       |
| MADE1 | TTACTTTTGCACCA           |
| MADE1 | TTACTTTTGCACCA           |
| MADE1 | TTACTTTTGCACCA           |
| MADE1 | AAAAGTAACTGCGGTTTT       |
| MADE1 | AAAAGTAACTGCGGTTTTTG     |
| MADE1 | AAAAGTAACTGCGGTTTTTGC    |
| MADE1 | AAAAGTAACTGCGGTTTTTGCC   |
| MADE1 | AAAAGTAACTGCGGTTTTTGCC   |
| MADE1 | AAAAGTAACTGCGGTTTTTGCC   |
| MADE1 | AAAAACTGCAATTACTTT       |
| MADE1 | TGCAAAAAGTAATTGCAGTTTTT  |
| MADE1 | TGCAAAAAGTAATTGCAGTTT    |
| MADE1 | TGCAAAAAGTAATTGCAGTTTTTG |
| MADE1 | TGCAAAAAGTAATTGCAGTTTTTG |
| MADE1 | GCAAAAAGTAATTGCAGTTTTTG  |
| MADE1 | TGCAAAAAGTAATTGCAGTTTTTG |
| MADE1 | CAAAAACCGCAATTACTTTTGCA  |



|                                       |                         |
|---------------------------------------|-------------------------|
| GarnAlu1                              | CGCCTGTGATCCC           |
| GarnAlu1                              | GGGCGCCTGTGATCCCA       |
| GarnAlu1                              | GGCGCCTGTGATCCCAAC      |
| GarnAlu1                              | GCCTGTGATCCCA           |
| GarnAlu1                              | GCGCCTGTGATCCCAAC       |
| CR1_16_HM_CR1_Hydra_magnipapillata    | AGTATGTTCTTCCAGG        |
| EnSpm_7_HM_EnSpm_Hydra_magnipapillata | ATGTATAAATGTAT          |
| EnSpm_7_HM_EnSpm_Hydra_magnipapillata | TATAAATGTATACACA        |
| EnSpm_7_HM_EnSpm_Hydra_magnipapillata | TATAAATGTATACACAC       |
| MADE1                                 | CAGCAATTACCTTT          |
| MADE1                                 | GAAAACAGCAATTACCTTT     |
| MADE1                                 | CGAAAACAGCAATTA         |
| MADE1                                 | TTGCAGTTTTTCCC          |
| hAT-N53_DR                            | CATGCACACACCCACA        |
| hAT-N53_DR                            | CACACACCCACA            |
| hAT-N53_DR                            | CACGCTCATGCAC           |
| hAT-N53_DR                            | TGAGTGTGTGTGTGAGTGTGT   |
| hAT-N53_DR                            | GTGTGTGTGTGTGAGTGTG     |
| hAT-N53_DR                            | TGAGTGTGTGTGTGTG        |
| hAT-N53_DR                            | TGAGTGTGTGTGTGTGAGTGTGT |
| hAT-N53_DR                            | GTGTGTGTGTGTGAGTGTGT    |
| hAT-N53_DR                            | GTGTGTGTGTGTGAGTGTG     |
| hAT-N53_DR                            | GTGTGTGTGTGTGAG         |
| hAT-N53_DR                            | GTGTGTGTGTGTGAGTGTGT    |
| hAT-N53_DR                            | GTGTGTGTGTGTGAGTGTG     |
| hAT-N53_DR                            | GTGTGTGTGTGTGAG         |
| hAT-N53_DR                            | GTGTGTGTGTGTGAGTGTGT    |
| hAT-N53_DR                            | GTGTGTGTGTGTGAGTGTGT    |
| hAT-N53_DR                            | GTGTGTGTGTGTGAGTGTG     |
| hAT-N53_DR                            | TGTGTGTGTGTGAGTGTGT     |
| hAT-N53_DR                            | GTGTGTGTGTGTGAGTGTGT    |
| hAT-N53_DR                            | GTGTGTGTGTGTGAGTGTGT    |











|            |                      |
|------------|----------------------|
| hAT-N53_DR | GTGTGTGTGTGTGAGTGTGT |
| hAT-N53_DR | TGTGTGTGTGTGAGTGTGT  |
| hAT-N53_DR | GTGTGTGTGTGTGAGTGTGT |
| hAT-N53_DR | GTGTGTGTGTGTGAGTGTGT |
| hAT-N53_DR | GTGTGTGTGTGTGAGTGTGT |
| hAT-N53_DR | GTGTGTGTGTGTGAGTGTG  |
| hAT-N53_DR | TGAGTGTGTGTGTGAGTGTG |
| hAT-N53_DR | GTGTGTGTGTGAGTGTG    |
| hAT-N53_DR | GTGTGTGTGTGTG        |
| hAT-N53_DR | GTGTGTGTGTGTG        |
| hAT-N53_DR | TGAGTGTGTGTGTG       |
| hAT-N53_DR | TGAGTGTGTGTGTG       |
| hAT-N53_DR | GAGTGTGTGTGTGAGTGTG  |
| hAT-N53_DR | GTGTGTGTGTGTGAG      |
| hAT-N53_DR | GTGTGTGTGTGTGAG      |
| hAT-N53_DR | GTGTGTGTGTGTGA       |
| hAT-N53_DR | GTGTGTGTGTGTGAGTGTGT |
| MADE1      | TTCATTTGGTATA        |
| L3         | AACTGGTTGAACAA       |
| L3         | ACAGTTGTTCAACC       |
| L3         | TGTTCAACCAGTT        |
| L3         | TGTTCAACCAGTT        |
| MER81      | TTGCCTGGGACTGAG      |
| CACTA_LP   | CGTTGTCATCGTCA       |
| CACTA_LP   | TCATCGTTGTCATCGTCA   |
| LTR96_MD   | ATTGTTGGAGGAG        |
| LTR96_MD   | ATTGTTGGAGGAG        |
| MADE1      | GCAATTACTTTTGC       |
| MADE1      | GCAATTACTTTTGC       |
| MADE1      | CAATTACTTTTGC        |
| MADE1      | TGCAATTACTTTTGC      |

|                                                               |                        |
|---------------------------------------------------------------|------------------------|
| MADE1                                                         | ACTGCAATTACTTTTGC      |
| MADE1                                                         | GCAATTACTTTTGC         |
| MADE1                                                         | CAATTACTTTTGC          |
| MADE1                                                         | CAATTACTTTTGC          |
| MADE1                                                         | CAATTACTTTTGC          |
| MADE1                                                         | ACTGCAATTACTTTTGC      |
| MADE1                                                         | GCAATTACTTTTGC         |
| MADE1                                                         | CAATTACTTTTGC          |
| L2                                                            | CTTCAGTGACTT           |
| EnSpm_7_HM_EnSpm_Hydra_magnipapillata                         | GAGATAGATATAGA         |
| L1MC1_EC                                                      | AGGGGGAAAGTTCT         |
| ENSPM1_ZM                                                     | CGCGGGCGGGTG           |
| L1MB3_EC                                                      | GTGGCTTTCTTA           |
| CHARLIE3                                                      | GCTGGTACTGCTGA         |
| MER91C                                                        | AGGAGAGGGTGCCA         |
| L2_Platt1r                                                    | AAGGAGCTTACAATCTAGCTGG |
| L2_Platt1r                                                    | AGGAGCTTACAATCTAGCTGGG |
| L2_Platt1r                                                    | AAGGAGCTTACAATCTAG     |
| L2_Platt1r                                                    | AGGAGCTTACAATCTAG      |
| L2_Platt1r                                                    | AAGGAGCTTACAATCTAG     |
| L2_Platt1r                                                    | AAGGAGCTTACAATCTAG     |
| L2_Platt1r                                                    | GAGCTTACAATCTAG        |
| L2_Platt1r                                                    | AAGGAGCTTACAATCTAGC    |
| L2_Platt1r                                                    | AAGGAGCTTACAATCTA      |
| L2_Platt1r                                                    | AAGGAGCTTACAATCTA      |
| L2_Platt1r                                                    | AGGAGCTTACAATCTA       |
| L2_Platt1r                                                    | AAGGAGCTTACAATCTA      |
| L2_Platt1r                                                    | AAGGAGCTTACAA          |
| L2_1b_Cis_CR1_Ciona_savignyi                                  | AAGACTAGTGATTTT        |
| L2_1b_Cis_CR1_Ciona_savignyi                                  | ACTAGTGATTTTGT         |
| L2_1b_Cis_CR1_Ciona_savignyi                                  | GTGATTTTGTGT           |
| HERVS71                                                       | CTGGGGCCTCCA           |
| HERVS71                                                       | CTGGGGCCTCCA           |
| NonLTR_5_CR_Non_LTR_Retrotransposon_Chlamydomonas_reinhardtii | GGCTGGGGCCGGGGCC       |
| NonLTR_5_CR_Non_LTR_Retrotransposon_Chlamydomonas_reinhardtii | GGCTGGGGCCGGGGCC       |
| NonLTR_5_CR_Non_LTR_Retrotransposon_Chlamydomonas_reinhardtii | GGGGCTGGGGCCGGGGCCG    |



≡

igning to

embl

n.

Region

5' UTR

5' UTR

5' UTR

5' UTR

5' UTR

ORF

3' UTR

3' UTR

5' UTR

5' UTR

5' UTR

ORF

5' UTR

5' UTR

5' UTR

5' UTR

5' UTR

3' UTR

ORF

5' UTR

ORF

ORF

3' UTR

3' UTR

3' UTR

5' UTR

5' UTR

5' UTR

5' UTR









5' UTR  
5' UTR  
5' UTR  
5' UTR  
5' UTR  
5' UTR  
5' UTR  
5' UTR  
5' UTR  
5' UTR  
5' UTR  
5' UTR  
5' UTR  
5' UTR  
5' UTR  
5' UTR  
ORF  
ORF  
3' UTR  
5' UTR  
5' UTR  
ORF  
3' UTR  
3' UTR  
5' UTR









5' UTR  
5' UTR  
5' UTR  
5' UTR  
5' UTR  
5' UTR  
5' UTR  
5' UTR  
5' UTR  
5' UTR  
ORF  
3' UTR  
5' UTR  
ORF  
3' UTR  
3' UTR  
3' UTR  
3' UTR  
5' UTR  
5' UTR  
ORF

3' UTR  
3' UTR  
3' UTR  
3' UTR  
3' UTR  
ORF  
3' UTR  
5' UTR  
5' UTR  
ORF  
5' UTR  
5' UTR  
5' UTR  
ORF  
ORF  
3' UTR  
5' UTR  
3' UTR  
3' UTR  
3' UTR  
3' UTR  
3' UTR  
3' UTR  
5' UTR  
ORF  
3' UTR  
3' UTR  
5' UTR  
5' UTR  
ORF

3' UTR  
3' UTR  
5' UTR  
3' UTR  
5' UTR  
5' UTR  
5' UTR  
ORF  
ORF  
3' UTR  
5' UTR  
ORF  
5' UTR  
5' UTR  
5' UTR  
5' UTR  
ORF  
5' UTR  
5' UTR  
5' UTR  
5' UTR  
5' UTR  
5' UTR  
5' UTR











ORF  
ORF  
ORF  
5' UTR  
5' UTR  
ORF  
5' UTR  
3' UTR  
3' UTR  
5' UTR  
ORF  
5' UTR  
5' UTR  
ORF  
ORF  
5' UTR  
3' UTR  
ORF  
3' UTR  
5' UTR  
5' UTR  
3' UTR  
3' UTR  
5' UTR  
3' UTR  
5' UTR  
5' UTR  
5' UTR  
5' UTR  
5' UTR  
5' UTR

5' UTR  
3' UTR  
5' UTR  
ORF  
3' UTR  
5' UTR  
5' UTR  
5' UTR  
ORF  
ORF  
ORF  
5' UTR  
5' UTR  
5' UTR  
ORF  
5' UTR  
3' UTR  
ORF  
3' UTR  
3' UTR  
5' UTR  
3' UTR  
3' UTR  
3' UTR  
5' UTR  
5' UTR

5' UTR  
5' UTR  
3' UTR  
ORF  
ORF  
ORF  
3' UTR  
5' UTR  
5' UTR  
3' UTR  
5' UTR  
ORF  
3' UTR  
3' UTR  
3' UTR  
5' UTR  
5' UTR  
3' UTR  
3' UTR  
3' UTR  
3' UTR  
5' UTR  
3' UTR  
5' UTR  
5' UTR  
5' UTR  
3' UTR  
3' UTR  
3' UTR  
3' UTR  
5' UTR  
3' UTR  
3' UTR  
5' UTR  
3' UTR  
3' UTR

5' UTR  
3' UTR  
3' UTR  
3' UTR  
3' UTR  
5' UTR  
5' UTR  
3' UTR  
3' UTR  
ORF  
3' UTR  
ORF  
3' UTR  
5' UTR  
ORF  
ORF  
3' UTR  
5' UTR  
5' UTR  
3' UTR  
3' UTR  
3' UTR  
5' UTR  
5' UTR  
ORF  
ORF  
ORF  
5' UTR  
ORF  
ORF  
ORF  
ORF  
ORF  
ORF  
ORF  
ORF  
3' UTR























ORF

ORF

ORF

5' UTR

ORF

ORF

ORF















3' UTR  
5' UTR  
3' UTR  
5' UTR  
5' UTR  
5' UTR  
ORF  
5' UTR  
3' UTR  
ORF  
ORF  
3' UTR  
5' UTR  
3' UTR  
5' UTR  
5' UTR  
5' UTR

5' UTR  
5' UTR  
5' UTR  
5' UTR  
5' UTR  
5' UTR  
5' UTR  
5' UTR  
5' UTR  
5' UTR  
5' UTR  
5' UTR  
ORF  
3' UTR  
3' UTR  
3' UTR  
3' UTR  
3' UTR  
5' UTR
