# Supplementary material for: OrbId: Origin-based identification of microRNA targets
Source: PubMed Central journal article supplement — Mob Genet Elements. 2012 Jul 1;2(4):184–92. doi: 10.4161/mge.21617 (PMC3469430; doi:10.4161/mge.21617), 2012-07-01
Supplement: mge-2-184-s03.pdf [file mge-2-184-s03.pdf]

**Supplemental Table 2.** Aligning sequences for three way alignments of full Orblid prediction set. The aligning miR, mRNA, and TE sequences corresponding to each Orblid predicted target are provided in FASTA format. The TE sequence orientations have been verified for alignment, and mRNA sequences reverse complemented. All repeat annotations refer to RepBase<sup>42, 43</sup> identifiers except for RF numbers (e.g. "RF00026 U6" or "RF00100 7SK") which refer to RFAM5<sup>46,47</sup>. ClustalW alignments can be obtained at: <http://www.genome.jp/tools/clustalw/>.

### 3pUTR Aligning Sequences

---

```
>hsamir161_3p
CCAGTATTAAGTGTGCTGCTGA
>AAYZ01253455.1_1930x1824_RF00026_U6
AATTATCTCCAGTATTAAGTGTGCTGCTGAA
>CASC1
AATTCTCTACCAGCAACAAGTGTGCTGCTGAA
```

```
>hsamiR548g_5p
TGCAAAAGTAATTGCAGTTTTTG
>MADE1
TGCAAAAGTAATTGCAGTTTTT
>C8orf42
TGCAAAAGTAATTGCTGTTTTT
```

```
>hsamiR548x_5p
TGCAAAAGTAATTGCAGTTTTTG
>MADE1
TGCAAAAGTAATTGCAGTTTTT
>C8orf42
TGCAAAAGTAATTGCTGTTTTT
```

```
>hsamiR1277_3p
TACGTAGATATATATGTATTTT
>EnSpm-8_HM
TATACGTAGATATATATGTATTTTT
>BCORL1
TATATGTATATATATATGTATTTTT
```

```
>hsamiR1277_5p
AAATATATATATATATGTACGTAT
>EnSpm-8_HM
TATACGTAGATATATATGTATTTTT
>BCORL1
```

TATATGTATATATATATGTATTTTT

>hsamiR1277\_3p

TACGTAGATATATATGTATTTTT

>EnSpm-8\_HM

TAGATATATATGTATTTTT

>WWP1

TAGATATATATGTATTTTT

>hsamiR548s

ATGGCCAAAACACTGCAGTTATTTTT

>MADE1

AAAACACTGCAGTTATTTTT

>HPS5

AAAACACTGCAGTAATTTTT

>hsamir7\_5p

TGGAAGACTAGTGATTTTGTTGT

>L2\_1b\_Cis\_CR1\_Ciona\_savignyi

GTGATTTTGTTGTTTT

>METTL16

GTGATTTTGTTGTTTT

>hsamir376b

ATCATAGAGGAAAATCCATGTT

>CER15\_I\_CE\_LTR\_Retrotransposon\_Caenorhabditis\_elegans

GAAAATCCATGTTTT

>C6orf130

GAAAATCCATGTTTT

>hsamiR548d\_5p

AAAAGTAATTGTGGTTTTTGCC

>MADE1

TATTAGGTTGGTGCAAAAAGTAATTGTGGTTTT

>ALG10B

TATTAGGTTGGTACAAAAGTAATTGTGGTTTT

>hsamiR548d\_5p

AAAAGTAATTGTGGTTTTTGCC

>MADE1

TATTAGGTTGGTGCAAAAAGTAATTGTGGTTTT

>ALG10

TATTAGGTTGGTAAAAAGTAATTGTGGTTTT

>hsamiR548d\_5p  
AAAAGTAATTGTGGTTTTTGCC  
>MADE1  
TTAGGTTGGTGCAAAAGTAATTGTGGTTTT  
>CD38  
TTAGGTTGGTTCAAAATAATTGTGGTTTT

>hsamiR548d\_5p  
AAAAGTAATTGTGGTTTTTGCC  
>MADE1  
TATTAGGTTGGTGCAAAAGTAATTGTGGTTTT  
>CD38  
TATTAGGTTGGTTCAAAATAATTGTGGTTTT

>hsamiR548b\_5p  
AAAAGTAATTGTGGTTTTGGCC  
>MADE1  
TTAGGTTGGCGCAAAAGTAATTGTGGTTTT  
>KATNAL1  
TTAGGCTGGTGCAAAAGTAATTGCGGTTTT

>hsamiR548b\_5p  
AAAAGTAATTGTGGTTTTGGCC  
>MADE1  
AGGTTGGCGCAAAAGTAATTGTGGTTTT  
>ANKRD5  
AGGTTGGAGCAAAAGTAATTGCGGTTTT

>hsamiR548w  
AAAAGTAACTGCGTTTTTGCC  
>MADE1  
GGTTGGTGCAAAAGTAACTGCGTTTT  
>SETMAR  
GGTTGGTGCAAACTAACTGCGTTTT

>hsamiR548d\_3p  
CAAAAACCACAGTTTCTTTTGC  
>MADE1  
TAATGGCAAAAACCACAGTTTCTTTT  
>NWD1  
TAATGGCGAAAACCACAGTTACTTTT

>hsamiR1289  
TGGAGTCCAGGAATCTGCATTTT  
>MER5A  
AGGAATCTGCATTTT  
>F2RL1  
AGGAATCTGCATTTT

>hsamiR1289  
TGGAGTCCAGGAATCTGCATTTT  
>MER5A  
TGGAGTCCAGGAATCTGCATTTT  
>NIPAL3  
TGGGGTGCAGGAATCTGCATTTT

>hsamiR1289  
TGGAGTCCAGGAATCTGCATTTT  
>MER5A  
GGTCCTAGTTAAAAAGGCACATTCCTAGACCCTGCCTCAGAACTACTGAACAGAGTCACTGGGTGTGGAGTCCAG  
GAATCTGCATTTT  
>NIPAL3  
GGTACCAGTTAAGAATGCAGACCCGTGGGCCCCACTCCAGTCCCCTAACAGTGTCTGCAGTTGGGGTGCAGGA  
ATCTGCATTTT

>hsamiR548g\_5p  
TGCAAAAGTAATTGCAGTTTTTG  
>MADE1  
GTGCAAAAGTAATTGCAGTTT  
>PGM3  
GTGCAAAAGTAATTGCTGTTT

>hsamiR548x\_5p  
TGCAAAAGTAATTGCAGTTTTTG  
>MADE1  
GTGCAAAAGTAATTGCAGTTT  
>PGM3  
GTGCAAAAGTAATTGCTGTTT

>hsamir302f  
TAATTGCTTCCATGTTT  
>THER1\_SINE\_Mammalia  
CACTTAATTGCTTCCATGTTT  
>RAB8B  
CACTTCATTGCTTCCATGTTT

>hsamir376b  
ATCATAGAGGAAAATCCATGTT  
>CER15\_I\_CE\_LTR\_Retrotransposon\_Caenorhabditis\_elegans  
AGAGGAAAATCCATGTTT  
>CCRL2  
AGATGAAAATCCATGTTT

>hsamiR376a\_3p  
ATCATAGAGGAAAATCCACGT  
>CER15\_I\_CE\_LTR\_Retrotransposon\_Caenorhabditis\_elegans  
GGAAAATCCACGTTT

>MBTPS2  
GGAAAATCCACGTTT

>hsamiR570\_3p  
CGAAAACAGCAATTACCTTTGC

>MADE1  
GAAAACAGCAATTACCTTT  
>BHLHB9  
GAAAAAAGCAATTACCTTT

>hsamiR548x\_3p  
TAAAAACTGCAATTACTTTC

>MADE1  
AAAAACTGCAATTACTTT  
>SUMF1  
AAAAACTGCAATTACTTT

>hsamiR548h\_5p  
AAAAGTAATCGCGTTTTTGTGTC  
>MADE1  
TATTAGGTTGGTGCAAAAAGTAATCGCGTTTTTGTGTCATTACTTT  
>MTMR6  
TATTAGGTTGGTGCAAAAAGTAATTGCGTTTTTGTGTCATCACTTT

>hsamiR548q  
GCTGGTGCAAAAAGTAATGGCGG  
>MADE1  
TATTAGGCTGGTGCAAAAAGTAATGGCGTTTTTGTGTCATTACTTT  
>MTMR6  
TATTAGGTTGGTGCAAAAAGTAATTGCGTTTTTGTGTCATCACTTT

>hsamir376b  
ATCATAGAGGAAAATCCATGTT  
>CER15\_I\_CE\_LTR\_Retrotransposon\_Caenorhabditis\_elegans  
AATCATAGAGGAAAATCCATGTT  
>BCAT1  
AATCATTGAGGAAAATCCCATGTT

>hsamiR582\_5p  
TTACAGTTGTTCAACCAGTTACT  
>L3  
ATTACAGTTGTTCAACCAGTT  
>PLEKHA1  
ATTACAGTTGTTCAACCAGTT

>hsamir302b\_5p  
ACTTTAACATGGAAGTGCTTTC  
>THER1\_SINE\_Mammalia

CTTTAACATGGAAGTGCTT  
>MAP3K8  
CTTTAACATGGAAGTACTT

>hsamir302b\_5p  
ACTTTAACATGGAAGTGCTTTC  
>THER1\_SINE\_Mammalia  
CAACTTTAACATGGAAGTGCTT  
>MAP3K8  
CATCTTTAACATGGAAGTACTT

>hsamiR548g\_3p  
AAAAGTGAATTACTTTTGTAC  
>MADE1  
TAATTACTTTTGTACCAACATAACTT  
>MC2R  
TAATTACTTTTGTACCTACCTAATAACTT

>hsamiR574\_5p  
TGAGTGTGTGTGTGTGAGTGTGT  
>hAT-N53\_DR  
GCGTGTGAGTGTGTGTGTGTGAGTGTGTGT  
>AR  
GTGTGTGTGTGTGTGTGTGTGTTTAGACAGACTGGAGAAGGTGGGAAAGACAGGCCCCAGGCAAGTCAGGGAGAG  
TCCTTCTGACTCTCACATGTGTGTTCCCTGGCTTCACAGACTCCACTTCTCCACTAGAAAGAAACTGGTGTCAATAT  
GGAAGCTATGGAGCAGAGAGAGAACAAGATATTCCAACTCTAAGTGATTCTTCTTTGACATCAATACAATATTTG  
AGTCTGGCTTGGGAGAAGAATGAGAGGCTTACAAGTGAAGAGAAGCATGTGATGTGAGAGAGCAATCAAGG  
AGTGTGGCTACAGTAAGGCTAGATGTAAGAGGGAAAGTCGGACTGTAGTCTCTCAGTGTGTTTGAAGAGAGGGG  
TTGGCTGGCTTCTTCTCCTGGAGAAGCAGAAATCTGGTCCTTGTACTGAACTT

>hsamiR574\_5p  
TGAGTGTGTGTGTGTGAGTGTGT  
>hAT-N53\_DR  
GCGTGTGAGTGTGTGTGTGTGAGTGTGTGT  
>AR  
GTGTGTGTGTGTGTGTGTGTGTTTAGACAGACTGGAGAAGGTGGGAAAGACAGGCCCCAGGCAAGTCAGGGAG  
AGTCCTTCTGACTCTCACATGTGTGTTCCCTGGCTTCACAGACTCCACTTCTCCACTAGAAAGAAACTGGTGTCAA  
TATGGAAGCTATGGAGCAGAGAGAGAACAAGATATTCCAACTCTAAGTGATTCTTCTTTGACATCAATACAATAT  
TTGAGTCTGGCTTGGGAGAAGAATGAGAGGCTTACAAGTGAAGAGAAGCATGTGATGTGAGAGAGCAATCA  
AGGAGTGTGGCTACAGTAAGGCTAGATGTAAGAGGGAAAGTCGGACTGTAGTCTCTCAGTGTGTTTGAAGAGAG  
GGGTTGGCTGGCTTCTTCTCCTGGAGAAGCAGAAATCTGGTCCTTGTACTGAACTT

>hsamiR574\_5p  
TGAGTGTGTGTGTGTGAGTGTGT  
>hAT-N53\_DR  
GCGTGTGAGTGTGTGTGTGTGAGTGTGTGT  
>AR







AGAGAGCAATCAAGGAGTGTGGCTACAGTAAGGCTAGATGTAAGAGGGAAAGTCGGACTGTAGTCTCTCAGTGT  
GTTTGAAGAGAGGGGTTGGCTGGCTTCTTCTCCTGGAGAAGCAGAAATCTGGTCCTTGTTACTGAACTT

>hsamiR574\_5p

TGAGTGTGTGTGTGTGAGTGTGT

>hAT-N53\_DR

GCGTGTGAGTGTGTGTGTGTGAGTGTGTGT

>AR

GTGTGTGTGTGTGAGAGAGAGAGAGAGTGTGTGTGTGTGGGGGGGGAGAGAGAGAGAGAGCGTGTGTGTGT  
GTGTGTGTGTGTGTGTGTGTGTGTGTTTAGACAGACTGGAGAAGGTGGGAAAGACAGGCCCCAGGCAAGTCAGGGA  
GAGTCTTCTGACTCTCACATGTGTGTTCCCTGGCTTCACAGACTCCACTTCTCCACTAGAAAGAAACTGGTGTCA  
ATATGGAAGCTATGGAGCAGAGAGAGAACAAGATATCCAAACTCTAAGTGATTCTTCTTTGACATCAATACAATA  
TTTGAGTCTGGCTTGGGAGAAGAATGAGAGGCTTACAACCTGATGAAGAGAAGCATGTGATGTGAGAGAGCAATC  
AAGGAGTGTGGCTACAGTAAGGCTAGATGTAAGAGGGAAAGTCGGACTGTAGTCTCTCAGTGTGTTTGAAGAGA  
GGGGTTGGCTGGCTTCTTCTCCTGGAGAAGCAGAAATCTGGTCCTTGTTACTGAACTT

>hsamiR548v

AGCTACAGTTACTTTTGCACCA

>MADE1

TTACTTTTGCACCAGCCTAATATT

>SUMF1

TTACTTTTGCACCAACCTAATATT

>hsamiR548f

AAAAACTGTAATTACTTTT

>MADE1

TTTAATGGCAAAAACCTGTAATTACTTTTGCACCAACCTAATATT

>SUMF1

TTTAATGGCAAAAACCTGCAATTACTTTTGCACCAACCTAATATT

>hsamiR376a\_5p

GTAGATTCTCCTTCTATGAGTA

>CER15\_I\_CE\_LTR\_Retrotransposon\_Caenorhabditis\_elegans

TCTCCTTCTATGAGTACATTATTTATGATT

>GTPBP10

TCTCCTTCTATGAGTTCAACTTAAGATT

>hsamiR548d\_5p

AAAAGTAATTGTGGTTTTTGCC

>MADE1

TTAGGTTGGTGCAAAAAGTAATTGTGGTTTTTGCCATT

>NWD1

TTAGGTTGATGCAAAATTAATTGTGGTTTTTGCCATT

>hsamiR548h\_5p

AAAAGTAATCGCGTTTTTGTC

>MADE1

GGTGCAAAGTAATCGCGGTTTTGTCATT  
>KATNAL1  
GGTGCAAAGTAATTGCGGTTTTGCCATT

>hsamiR548h\_5p  
AAAAGTAATCGCGGTTTTGTC  
>MADE1  
TTAGGTTGGTGCAAAGTAATCGCGGTTTTGTCATT  
>KATNAL1  
TTAGGCTGGTGCAAAGTAATTGCGGTTTTGCCATT

>hsamiR548q  
GCTGGTGCAAAGTAATGGCGG  
>MADE1  
TTAGGCTGGTGCAAAGTAATGGCGGTTTTGCCATT  
>KATNAL1  
TTAGGCTGGTGCAAAGTAATTGCGGTTTTGCCATT

>hsamiR548d\_5p  
AAAAGTAATTGTGGTTTTGCC  
>MADE1  
GTTGGTGCAAAGTAATTGTGGTTTTGCCATT  
>DENND4C  
GTTGGTACAAAATAATTGCGGTTTTGCCATT

>hsamiR421  
ATCAACAGACATTAATTGGGCGC  
>MIR2\_Repetitive\_sequence\_Mammalia  
TCATCAACAGACATT  
>CLASP1  
TCATCAACAGACATT

>hsamiR325  
CCTAGTAGGTGTCCAGTAAGTGT  
>LINE2\_Non\_LTR\_retrotransposon\_Eutheria  
TAGGTGTCCAGTAAGTGTGT  
>MLL  
TAGGTGTCCAGTAAATTTTGT

>hsamiR574\_5p  
TGAGTGTGTGTGTGAGTGTGT  
>hAT-N53\_DR  
TGTGAGTGTGTGTGTGAGTGTGTGT  
>PPP2R1B  
TGTGTGTGTGTGTGTGTGTGTGTGTGTGT

>hsamiR574\_5p  
TGAGTGTGTGTGTGAGTGTGT

>hAT-N53\_DR  
TGTGAGTGTGTGTGTGTGAGTGTGTGT  
>ARHGEF9  
TGTGTGTGTGTGTGTGTGTGTGTGTGT

>hsamiR574\_5p  
TGAGTGTGTGTGTGTGAGTGTGT  
>hAT-N53\_DR  
TGTGAGTGTGTGTGTGTGAGTGTGTGT  
>ZEB1  
TGTGTGTGTGTGTGTGTGTGTGTGTGT

>hsamiR574\_5p  
TGAGTGTGTGTGTGTGAGTGTGT  
>hAT-N53\_DR  
TGTGAGTGTGTGTGTGTGAGTGTGTGT  
>CYLC2  
TGTGTGTGTGTGTGTGTGTGTGTGTGT

>hsamiR574\_5p  
TGAGTGTGTGTGTGTGAGTGTGT  
>hAT-N53\_DR  
TGTGAGTGTGTGTGTGTGAGTGTGTGT  
>CHST11  
TGTGTGTGTGTGTGTGTGTGTGTGTGT

>hsamiR574\_5p  
TGAGTGTGTGTGTGTGAGTGTGT  
>hAT-N53\_DR  
TGTGAGTGTGTGTGTGTGAGTGTGTGT  
>STXBP6  
TGTGTGTGTGTGTGTGTGTGTGTGTGT

>hsamiR574\_5p  
TGAGTGTGTGTGTGTGAGTGTGT  
>hAT-N53\_DR  
TGTGAGTGTGTGTGTGTGAGTGTGTGT  
>AMOTL1  
TGTGTGTGTGTGTGTGTGTGTGTGTGT

>hsamiR574\_5p  
TGAGTGTGTGTGTGTGAGTGTGT  
>hAT-N53\_DR  
TGTGAGTGTGTGTGTGTGAGTGTGTGT  
>IGF1  
TGTGTGTGTGTGTGTGTGTGTGTGTGT

>hsamiR574\_5p

TGAGTGTGTGTGTGTGAGTGTGT

>hAT-N53\_DR

TGTGAGTGTGTGTGTGTGAGTGTGTGT

>KATNAL1

TGTGTGTGTGTGTGTGTGTGTGTGTGT

>hsamiR574\_5p

TGAGTGTGTGTGTGTGAGTGTGT

>hAT-N53\_DR

GTGTGAGTGTGTGTGTGTGAGTGTGTGT

>STXBP6

GTGTGTGTGTGTGTGTGTGTGTGTGTGT

>hsamiR574\_5p

TGAGTGTGTGTGTGTGAGTGTGT

>hAT-N53\_DR

GTGTGAGTGTGTGTGTGTGAGTGTGTGT

>NMNAT2

GTGTGTGTGTGTGTGTGTGTGTGTGTGT

>hsamiR574\_5p

TGAGTGTGTGTGTGTGAGTGTGT

>hAT-N53\_DR

GTGTGAGTGTGTGTGTGTGAGTGTGTGT

>CYLC2

GTGTGTGTGTGTGTGTGTGTGTGTGTGT

>hsamiR574\_5p

TGAGTGTGTGTGTGTGAGTGTGT

>hAT-N53\_DR

GTGTGAGTGTGTGTGTGTGAGTGTGTGT

>AL020996.1

GTGTGTGTGTGTGTGTGTGTGTGTGTGT

>hsamiR574\_5p

TGAGTGTGTGTGTGTGAGTGTGT

>hAT-N53\_DR

GTGTGAGTGTGTGTGTGTGAGTGTGTGT

>RAB3IP

GTGTGTGTGTGTGTGTGTGTGTGTGTGT

>hsamiR574\_5p

TGAGTGTGTGTGTGTGAGTGTGT

>hAT-N53\_DR

GTGTGAGTGTGTGTGTGTGAGTGTGTGT

>NRXN1

GTGTGTGTGTGTGTGTGTGTGTGTGTGT

>hsamiR574\_5p  
TGAGTGTGTGTGTGTGAGTGTGT  
>hAT-N53\_DR  
GTGTGAGTGTGTGTGTGTGAGTGTGTGT  
>ZEB1  
GTGTGTGTGTGTGTGTGTGTGTGTGTGTGT

>hsamiR574\_5p  
TGAGTGTGTGTGTGTGAGTGTGT  
>hAT-N53\_DR  
GTGTGAGTGTGTGTGTGTGAGTGTGTGT  
>CREB3L2  
GTGTGTGTGTGTGTGTGTGTGTGTGTGTGT

>hsamiR574\_5p  
TGAGTGTGTGTGTGTGAGTGTGT  
>hAT-N53\_DR  
GTGTGAGTGTGTGTGTGTGAGTGTGTGT  
>LDB3  
GTGTGTGTGTGTGTGTGTGTGTGTGTGTGT

>hsamiR574\_5p  
TGAGTGTGTGTGTGTGAGTGTGT  
>hAT-N53\_DR  
GTGTGAGTGTGTGTGTGTGAGTGTGTGT  
>DCAKD  
GTGTGTGTGTGTGTGTGTGTGTGTGTGTGT

>hsamiR574\_5p  
TGAGTGTGTGTGTGTGAGTGTGT  
>hAT-N53\_DR  
GTGTGAGTGTGTGTGTGTGAGTGTGTGT  
>ARHGEF9  
GTGTGTGTGTGTGTGTGTGTGTGTGTGTGT

>hsamiR574\_5p  
TGAGTGTGTGTGTGTGAGTGTGT  
>hAT-N53\_DR  
GTGTGAGTGTGTGTGTGTGAGTGTGTGT  
>CHST11  
GTGTGTGTGTGTGTGTGTGTGTGTGTGTGT

>hsamiR574\_5p  
TGAGTGTGTGTGTGTGAGTGTGT  
>hAT-N53\_DR  
GTGTGAGTGTGTGTGTGTGAGTGTGTGT  
>THRA  
GTGTGTGTGTGTGTGTGTGTGTGTGTGTGT

>hsamiR574\_5p  
TGAGTGTGTGTGTGTGAGTGTGT  
>hAT-N53\_DR  
GTGTGAGTGTGTGTGTGTGAGTGTGTGT  
>BTBD9  
GTGTGTGTGTGTGTGTGTGTGTGTGTGTGT

>hsamiR574\_5p  
TGAGTGTGTGTGTGTGAGTGTGT  
>hAT-N53\_DR  
GTGTGAGTGTGTGTGTGTGAGTGTGTGT  
>C15orf57  
GTGTGTGTGTGTGTGTGTGTGTGTGTGTGT

>hsamiR574\_5p  
TGAGTGTGTGTGTGTGAGTGTGT  
>hAT-N53\_DR  
GTGTGAGTGTGTGTGTGTGAGTGTGTGT  
>RALGAPB  
GTGTGTGTGTGTGTGTGTGTGTGTGTGTGT

>hsamiR574\_5p  
TGAGTGTGTGTGTGTGAGTGTGT  
>hAT-N53\_DR  
GTGTGAGTGTGTGTGTGTGAGTGTGTGT  
>AMOTL1  
GTGTGTGTGTGTGTGTGTGTGTGTGTGTGT

>hsamiR574\_5p  
TGAGTGTGTGTGTGTGAGTGTGT  
>hAT-N53\_DR  
GTGTGAGTGTGTGTGTGTGAGTGTGTGT  
>PPP2R1B  
GTGTGTGTGTGTGTGTGTGTGTGTGTGTGT

>hsamiR574\_5p  
TGAGTGTGTGTGTGTGAGTGTGT  
>hAT-N53\_DR  
GTGTGAGTGTGTGTGTGTGAGTGTGTGT  
>PAX5  
GTGTGTGTGTGTGTGTGTGTGTGTGTGTGT

>hsamiR574\_5p  
TGAGTGTGTGTGTGTGAGTGTGT  
>hAT-N53\_DR  
GTGTGAGTGTGTGTGTGTGAGTGTGTGT  
>AR  
GTGTGTGTGTGTGTGTGTGTGTGTGTGTGT

>hsamiR574\_5p  
TGAGTGTGTGTGTGTGAGTGTGT  
>hAT-N53\_DR  
GTGTGAGTGTGTGTGTGTGAGTGTGTGT  
>NDUFB5  
GTGTGTGTGTGTGTGTGTGTGTGTGTGTGT

>hsamiR574\_5p  
TGAGTGTGTGTGTGTGAGTGTGT  
>hAT-N53\_DR  
GTGTGAGTGTGTGTGTGTGAGTGTGTGT  
>KATNAL1  
GTGTGTGTGTGTGTGTGTGTGTGTGTGTGT

>hsamiR574\_5p  
TGAGTGTGTGTGTGTGAGTGTGT  
>hAT-N53\_DR  
GTGTGAGTGTGTGTGTGTGAGTGTGTGT  
>RPH3A  
GTGTGTGTGTGTGTGTGTGTGTGTGTGTGT

>hsamiR574\_5p  
TGAGTGTGTGTGTGTGAGTGTGT  
>hAT-N53\_DR  
GTGTGAGTGTGTGTGTGTGAGTGTGTGT  
>XRCC1  
GTGTGTGTGTGTGTGTGTGTGTGTGTGTGT

>hsamiR574\_5p  
TGAGTGTGTGTGTGTGAGTGTGT  
>hAT-N53\_DR  
GTGTGAGTGTGTGTGTGTGAGTGTGTGT  
>IGF1  
GTGTGTGTGTGTGTGTGTGTGTGTGTGTGT

>hsamiR574\_5p  
TGAGTGTGTGTGTGTGAGTGTGT  
>hAT-N53\_DR  
GTGTGAGTGTGTGTGTGTGAGTGTGTGT  
>FOXN3  
GTGTGTGTGTGTGTGTGTGTGTGTGTGTGT

>hsamiR574\_5p  
TGAGTGTGTGTGTGTGAGTGTGT  
>hAT-N53\_DR  
GTGTGAGTGTGTGTGTGTGAGTGTGTGT  
>MGRN1  
GTGTGTGTGTGTGTGTGTGTGTGTGTGTGT

>hsamiR574\_5p  
TGAGTGTGTGTGTGTGAGTGTGT  
>hAT-N53\_DR  
GTGTGAGTGTGTGTGTGTGAGTGTGTGT  
>CHRD1  
GTGTGTGTGTGTGTGTGTGTGTGTGTGTGT

>hsamiR574\_5p  
TGAGTGTGTGTGTGTGAGTGTGT  
>hAT-N53\_DR  
TGTGAGTGTGTGTGTGTGAGTGTGTGT  
>CYLC2  
TGTGTGTGTGTGTGTGTGTGTGTGTGTGTGT

>hsamiR574\_5p  
TGAGTGTGTGTGTGTGAGTGTGT  
>hAT-N53\_DR  
TGTGAGTGTGTGTGTGTGAGTGTGTGT  
>STXBP6  
TGTGTGTGTGTGTGTGTGTGTGTGTGTGTGT

>hsamiR574\_5p  
TGAGTGTGTGTGTGTGAGTGTGT  
>hAT-N53\_DR  
TGTGAGTGTGTGTGTGTGAGTGTGTGT  
>CHST11  
TGTGTGTGTGTGTGTGTGTGTGTGTGTGTGT

>hsamiR574\_5p  
TGAGTGTGTGTGTGTGAGTGTGT  
>hAT-N53\_DR  
TGTGAGTGTGTGTGTGTGAGTGTGTGT  
>ZEB1  
TGTGTGTGTGTGTGTGTGTGTGTGTGTGTGT

>hsamiR574\_5p  
TGAGTGTGTGTGTGTGAGTGTGT  
>hAT-N53\_DR  
TGTGAGTGTGTGTGTGTGAGTGTGTGT  
>PPP2R1B  
TGTGTGTGTGTGTGTGTGTGTGTGTGTGTGT

>hsamiR574\_5p  
TGAGTGTGTGTGTGTGAGTGTGT  
>hAT-N53\_DR  
TGTGAGTGTGTGTGTGTGAGTGTGTGT  
>AMOTL1  
TGTGTGTGTGTGTGTGTGTGTGTGTGTGTGT



>hsamiR574\_5p  
TGAGTGTGTGTGTGTGAGTGTGT  
>hAT-N53\_DR  
TGTGAGTGTGTGTGTGTGAGTGTGTGT  
>ARHGEF9  
TGTGTGTGTGTGTGTGTGTGTGTGTGTGT

>hsamiR574\_5p  
TGAGTGTGTGTGTGTGAGTGTGT  
>hAT-N53\_DR  
TGTGAGTGTGTGTGTGTGAGTGTGTGT  
>KATNAL1  
TGTGTGTGTGTGTGTGTGTGTGTGTGTGT

>hsamiR574\_5p  
TGAGTGTGTGTGTGTGAGTGTGT  
>hAT-N53\_DR  
TGTGAGTGTGTGTGTGTGAGTGTGTGT  
>IGF1  
TGTGTGTGTGTGTGTGTGTGTGTGTGTGT

>hsamiR574\_5p  
TGAGTGTGTGTGTGTGAGTGTGT  
>hAT-N53\_DR  
GTGTGAGTGTGTGTGTGTGAGTGTGTGT  
>STXBP6  
GTGTGTGTGTGTGTGTGTGTGTGTGTGTGT

>hsamiR574\_5p  
TGAGTGTGTGTGTGTGAGTGTGT  
>hAT-N53\_DR  
GTGTGAGTGTGTGTGTGTGAGTGTGTGT  
>NMNAT2  
GTGTGTGTGTGTGTGTGTGTGTGTGTGTGT

>hsamiR574\_5p  
TGAGTGTGTGTGTGTGAGTGTGT  
>hAT-N53\_DR  
GTGTGAGTGTGTGTGTGTGAGTGTGTGT  
>CYLC2  
GTGTGTGTGTGTGTGTGTGTGTGTGTGTGT

>hsamiR574\_5p  
TGAGTGTGTGTGTGTGAGTGTGT  
>hAT-N53\_DR  
GTGTGAGTGTGTGTGTGTGAGTGTGTGT  
>CREB3L2  
GTGTGTGTGTGTGTGTGTGTGTGTGTGTGT

>hsamiR574\_5p  
TGAGTGTGTGTGTGTGAGTGTGT  
>hAT-N53\_DR  
GTGTGAGTGTGTGTGTGTGAGTGTGTGT  
>NRXN1  
GTGTGTGTGTGTGTGTGTGTGTGTGTGTGT

>hsamiR574\_5p  
TGAGTGTGTGTGTGTGAGTGTGT  
>hAT-N53\_DR  
GTGTGAGTGTGTGTGTGTGAGTGTGTGT  
>ZEB1  
GTGTGTGTGTGTGTGTGTGTGTGTGTGTGT

>hsamiR574\_5p  
TGAGTGTGTGTGTGTGAGTGTGT  
>hAT-N53\_DR  
GTGTGAGTGTGTGTGTGTGAGTGTGTGT  
>DCAKD  
GTGTGTGTGTGTGTGTGTGTGTGTGTGTGT

>hsamiR574\_5p  
TGAGTGTGTGTGTGTGAGTGTGT  
>hAT-N53\_DR  
GTGTGAGTGTGTGTGTGTGAGTGTGTGT  
>ARHGEF9  
GTGTGTGTGTGTGTGTGTGTGTGTGTGTGT

>hsamiR574\_5p  
TGAGTGTGTGTGTGTGAGTGTGT  
>hAT-N53\_DR  
GTGTGAGTGTGTGTGTGTGAGTGTGTGT  
>CHST11  
GTGTGTGTGTGTGTGTGTGTGTGTGTGTGT

>hsamiR574\_5p  
TGAGTGTGTGTGTGTGAGTGTGT  
>hAT-N53\_DR  
GTGTGAGTGTGTGTGTGTGAGTGTGTGT  
>THRA  
GTGTGTGTGTGTGTGTGTGTGTGTGTGTGT

>hsamiR574\_5p  
TGAGTGTGTGTGTGTGAGTGTGT  
>hAT-N53\_DR  
GTGTGAGTGTGTGTGTGTGAGTGTGTGT  
>BTBD9  
GTGTGTGTGTGTGTGTGTGTGTGTGTGTGT

>hsamiR574\_5p  
TGAGTGTGTGTGTGTGAGTGTGT  
>hAT-N53\_DR  
GTGTGAGTGTGTGTGTGTGAGTGTGTGT  
>AL020996.1  
GTGTGTGTGTGTGTGTGTGTGTGTGTGTGT

>hsamiR574\_5p  
TGAGTGTGTGTGTGTGAGTGTGT  
>hAT-N53\_DR  
GTGTGAGTGTGTGTGTGTGAGTGTGTGT  
>LDB3  
GTGTGTGTGTGTGTGTGTGTGTGTGTGTGT

>hsamiR574\_5p  
TGAGTGTGTGTGTGTGAGTGTGT  
>hAT-N53\_DR  
GTGTGAGTGTGTGTGTGTGAGTGTGTGT  
>C15orf57  
GTGTGTGTGTGTGTGTGTGTGTGTGTGTGT

>hsamiR574\_5p  
TGAGTGTGTGTGTGTGAGTGTGT  
>hAT-N53\_DR  
GTGTGAGTGTGTGTGTGTGAGTGTGTGT  
>AMOTL1  
GTGTGTGTGTGTGTGTGTGTGTGTGTGTGT

>hsamiR574\_5p  
TGAGTGTGTGTGTGTGAGTGTGT  
>hAT-N53\_DR  
GTGTGAGTGTGTGTGTGTGAGTGTGTGT  
>PPP2R1B  
GTGTGTGTGTGTGTGTGTGTGTGTGTGTGT

>hsamiR574\_5p  
TGAGTGTGTGTGTGTGAGTGTGT  
>hAT-N53\_DR  
GTGTGAGTGTGTGTGTGTGAGTGTGTGT  
>AR  
GTGTGTGTGTGTGTGTGTGTGTGTGTGTGT

>hsamiR574\_5p  
TGAGTGTGTGTGTGTGAGTGTGT  
>hAT-N53\_DR  
GTGTGAGTGTGTGTGTGTGAGTGTGTGT  
>PAX5  
GTGTGTGTGTGTGTGTGTGTGTGTGTGTGT

>hsamiR574\_5p  
TGAGTGTGTGTGTGTGAGTGTGT  
>hAT-N53\_DR  
GTGTGAGTGTGTGTGTGTGAGTGTGTGT  
>NDUFB5  
GTGTGTGTGTGTGTGTGTGTGTGTGTGTGT

>hsamiR574\_5p  
TGAGTGTGTGTGTGTGAGTGTGT  
>hAT-N53\_DR  
GTGTGAGTGTGTGTGTGTGAGTGTGTGT  
>RAB3IP  
GTGTGTGTGTGTGTGTGTGTGTGTGTGTGT

>hsamiR574\_5p  
TGAGTGTGTGTGTGTGAGTGTGT  
>hAT-N53\_DR  
GTGTGAGTGTGTGTGTGTGAGTGTGTGT  
>RALGAPB  
GTGTGTGTGTGTGTGTGTGTGTGTGTGTGT

>hsamiR574\_5p  
TGAGTGTGTGTGTGTGAGTGTGT  
>hAT-N53\_DR  
GTGTGAGTGTGTGTGTGTGAGTGTGTGT  
>KATNAL1  
GTGTGTGTGTGTGTGTGTGTGTGTGTGTGT

>hsamiR574\_5p  
TGAGTGTGTGTGTGTGAGTGTGT  
>hAT-N53\_DR  
GTGTGAGTGTGTGTGTGTGAGTGTGTGT  
>IGF1  
GTGTGTGTGTGTGTGTGTGTGTGTGTGTGT

>hsamiR574\_5p  
TGAGTGTGTGTGTGTGAGTGTGT  
>hAT-N53\_DR  
GTGTGAGTGTGTGTGTGTGAGTGTGTGT  
>RPH3A  
GTGTGTGTGTGTGTGTGTGTGTGTGTGTGT

>hsamiR574\_5p  
TGAGTGTGTGTGTGTGAGTGTGT  
>hAT-N53\_DR  
GTGTGAGTGTGTGTGTGTGAGTGTGTGT  
>XRCC1  
GTGTGTGTGTGTGTGTGTGTGTGTGTGTGT

>hsamiR574\_5p  
TGAGTGTGTGTGTGTGAGTGTGT  
>hAT-N53\_DR  
GTGTGAGTGTGTGTGTGTGAGTGTGTGT  
>FOXN3  
GTGTGTGTGTGTGTGTGTGTGTGTGTGTGTGT

>hsamiR574\_5p  
TGAGTGTGTGTGTGTGAGTGTGT  
>hAT-N53\_DR  
GTGTGAGTGTGTGTGTGTGAGTGTGTGT  
>CHRD1  
GTGTGTGTGTGTGTGTGTGTGTGTGTGTGTGT

>hsamiR574\_5p  
TGAGTGTGTGTGTGTGAGTGTGT  
>hAT-N53\_DR  
TGTGAGTGTGTGTGTGTGAGTGTGTGT  
>STXBP6  
TGTGTGTGTGTGTGTGTGTGTGTGTGTGTGTGT

>hsamiR574\_5p  
TGAGTGTGTGTGTGTGAGTGTGT  
>hAT-N53\_DR  
TGTGAGTGTGTGTGTGTGAGTGTGTGT  
>ARHGEF9  
TGTGTGTGTGTGTGTGTGTGTGTGTGTGTGTGT

>hsamiR574\_5p  
TGAGTGTGTGTGTGTGAGTGTGT  
>hAT-N53\_DR  
TGTGAGTGTGTGTGTGTGAGTGTGTGT  
>PPP2R1B  
TGTGTGTGTGTGTGTGTGTGTGTGTGTGTGTGT

>hsamiR574\_5p  
TGAGTGTGTGTGTGTGAGTGTGT  
>hAT-N53\_DR  
TGTGAGTGTGTGTGTGTGAGTGTGTGT  
>CYLC2  
TGTGTGTGTGTGTGTGTGTGTGTGTGTGTGTGT

>hsamiR574\_5p  
TGAGTGTGTGTGTGTGAGTGTGT  
>hAT-N53\_DR  
TGTGAGTGTGTGTGTGTGAGTGTGTGT  
>CHST11  
TGTGTGTGTGTGTGTGTGTGTGTGTGTGTGTGT

>hsamiR574\_5p  
TGAGTGTGTGTGTGTGAGTGTGT  
>hAT-N53\_DR  
TGTGAGTGTGTGTGTGTGAGTGTGTGT  
>AMOTL1  
TGTGTGTGTGTGTGTGTGTGTGTGTGTGTGT

>hsamiR574\_5p  
TGAGTGTGTGTGTGTGAGTGTGT  
>hAT-N53\_DR  
TGTGAGTGTGTGTGTGTGAGTGTGTGT  
>ZEB1  
TGTGTGTGTGTGTGTGTGTGTGTGTGTGTGT

>hsamiR574\_5p  
TGAGTGTGTGTGTGTGAGTGTGT  
>hAT-N53\_DR  
TGTGAGTGTGTGTGTGTGAGTGTGTGT  
>KATNAL1  
TGTGTGTGTGTGTGTGTGTGTGTGTGTGTGT

>hsamiR574\_5p  
TGAGTGTGTGTGTGTGAGTGTGT  
>hAT-N53\_DR  
TGTGAGTGTGTGTGTGTGAGTGTGTGT  
>IGF1  
TGTGTGTGTGTGTGTGTGTGTGTGTGTGTGT

>hsamiR574\_5p  
TGAGTGTGTGTGTGTGAGTGTGT  
>hAT-N53\_DR  
GTGTGAGTGTGTGTGTGTGAGTGTGTGT  
>STXBP6  
GTGTGTGTGTGTGTGTGTGTGTGTGTGTGTGT

>hsamiR574\_5p  
TGAGTGTGTGTGTGTGAGTGTGT  
>hAT-N53\_DR  
GTGTGAGTGTGTGTGTGTGAGTGTGTGT  
>NMNAT2  
GTGTGTGTGTGTGTGTGTGTGTGTGTGTGTGT

>hsamiR574\_5p  
TGAGTGTGTGTGTGTGAGTGTGT  
>hAT-N53\_DR  
GTGTGAGTGTGTGTGTGTGAGTGTGTGT  
>CYLC2  
GTGTGTGTGTGTGTGTGTGTGTGTGTGTGTGT

>hsamiR574\_5p  
TGAGTGTGTGTGTGTGAGTGTGT  
>hAT-N53\_DR  
GTGTGAGTGTGTGTGTGTGAGTGTGTGT  
>CREB3L2  
GTGTGTGTGTGTGTGTGTGTGTGTGTGTGTGTGT

>hsamiR574\_5p  
TGAGTGTGTGTGTGTGAGTGTGT  
>hAT-N53\_DR  
GTGTGAGTGTGTGTGTGTGAGTGTGTGT  
>NRXN1  
GTGTGTGTGTGTGTGTGTGTGTGTGTGTGTGTGT

>hsamiR574\_5p  
TGAGTGTGTGTGTGTGAGTGTGT  
>hAT-N53\_DR  
GTGTGAGTGTGTGTGTGTGAGTGTGTGT  
>ZEB1  
GTGTGTGTGTGTGTGTGTGTGTGTGTGTGTGTGT

>hsamiR574\_5p  
TGAGTGTGTGTGTGTGAGTGTGT  
>hAT-N53\_DR  
GTGTGAGTGTGTGTGTGTGAGTGTGTGT  
>DCAKD  
GTGTGTGTGTGTGTGTGTGTGTGTGTGTGTGTGT

>hsamiR574\_5p  
TGAGTGTGTGTGTGTGAGTGTGT  
>hAT-N53\_DR  
GTGTGAGTGTGTGTGTGTGAGTGTGTGT  
>ARHGEF9  
GTGTGTGTGTGTGTGTGTGTGTGTGTGTGTGTGT

>hsamiR574\_5p  
TGAGTGTGTGTGTGTGAGTGTGT  
>hAT-N53\_DR  
GTGTGAGTGTGTGTGTGTGAGTGTGTGT  
>CHST11  
GTGTGTGTGTGTGTGTGTGTGTGTGTGTGTGTGT

>hsamiR574\_5p  
TGAGTGTGTGTGTGTGAGTGTGT  
>hAT-N53\_DR  
GTGTGAGTGTGTGTGTGTGAGTGTGTGT  
>BTBD9  
GTGTGTGTGTGTGTGTGTGTGTGTGTGTGTGTGT

>hsamiR574\_5p  
TGAGTGTGTGTGTGTGAGTGTGT  
>hAT-N53\_DR  
GTGTGAGTGTGTGTGTGTGAGTGTGTGT  
>AL020996.1  
GTGTGTGTGTGTGTGTGTGTGTGTGTGTGTGT

>hsamiR574\_5p  
TGAGTGTGTGTGTGTGAGTGTGT  
>hAT-N53\_DR  
GTGTGAGTGTGTGTGTGTGAGTGTGTGT  
>LDB3  
GTGTGTGTGTGTGTGTGTGTGTGTGTGTGTGT

>hsamiR574\_5p  
TGAGTGTGTGTGTGTGAGTGTGT  
>hAT-N53\_DR  
GTGTGAGTGTGTGTGTGTGAGTGTGTGT  
>C15orf57  
GTGTGTGTGTGTGTGTGTGTGTGTGTGTGTGT

>hsamiR574\_5p  
TGAGTGTGTGTGTGTGAGTGTGT  
>hAT-N53\_DR  
GTGTGAGTGTGTGTGTGTGAGTGTGTGT  
>THRA  
GTGTGTGTGTGTGTGTGTGTGTGTGTGTGTGT

>hsamiR574\_5p  
TGAGTGTGTGTGTGTGAGTGTGT  
>hAT-N53\_DR  
GTGTGAGTGTGTGTGTGTGAGTGTGTGT  
>AMOTL1  
GTGTGTGTGTGTGTGTGTGTGTGTGTGTGTGT

>hsamiR574\_5p  
TGAGTGTGTGTGTGTGAGTGTGT  
>hAT-N53\_DR  
GTGTGAGTGTGTGTGTGTGAGTGTGTGT  
>PPP2R1B  
GTGTGTGTGTGTGTGTGTGTGTGTGTGTGTGT

>hsamiR574\_5p  
TGAGTGTGTGTGTGTGAGTGTGT  
>hAT-N53\_DR  
GTGTGAGTGTGTGTGTGTGAGTGTGTGT  
>PAX5  
GTGTGTGTGTGTGTGTGTGTGTGTGTGTGTGT



>hsamiR574\_5p  
TGAGTGTGTGTGTGTGAGTGTGT  
>hAT-N53\_DR  
GTGTGAGTGTGTGTGTGTGAGTGTGTGT  
>AR  
GTGTGTGTGTGTGTGTGTGTGTGTGTGTGTGT

>hsamiR574\_5p  
TGAGTGTGTGTGTGTGAGTGTGT  
>hAT-N53\_DR  
GTGTGAGTGTGTGTGTGTGAGTGTGTGT  
>RAB3IP  
GTGTGTGTGTGTGTGTGTGTGTGTGTGTGTGT

>hsamiR574\_5p  
TGAGTGTGTGTGTGTGAGTGTGT  
>hAT-N53\_DR  
GTGTGAGTGTGTGTGTGTGAGTGTGTGT  
>RALGAPB  
GTGTGTGTGTGTGTGTGTGTGTGTGTGTGTGT

>hsamiR574\_5p  
TGAGTGTGTGTGTGTGAGTGTGT  
>hAT-N53\_DR  
GTGTGAGTGTGTGTGTGTGAGTGTGTGT  
>KATNAL1  
GTGTGTGTGTGTGTGTGTGTGTGTGTGTGTGT

>hsamiR574\_5p  
TGAGTGTGTGTGTGTGAGTGTGT  
>hAT-N53\_DR  
GTGTGAGTGTGTGTGTGTGAGTGTGTGT  
>IGF1  
GTGTGTGTGTGTGTGTGTGTGTGTGTGTGTGT

>hsamiR574\_5p  
TGAGTGTGTGTGTGTGAGTGTGT  
>hAT-N53\_DR  
GTGTGAGTGTGTGTGTGTGAGTGTGTGT  
>XRCC1  
GTGTGTGTGTGTGTGTGTGTGTGTGTGTGTGT

>hsamiR574\_5p  
TGAGTGTGTGTGTGTGAGTGTGT  
>hAT-N53\_DR  
GTGTGAGTGTGTGTGTGTGAGTGTGTGT  
>CHRD1  
GTGTGTGTGTGTGTGTGTGTGTGTGTGTGTGT

>hsamiR574\_5p  
TGAGTGTGTGTGTGTGAGTGTGT  
>hAT-N53\_DR  
GTGTGAGTGTGTGTGTGTGAGTGTGTGT  
>FOXN3  
GTGTGTGTGTGTGTGTGTGTGTGTGTGTGTGT

>hsamiR574\_5p  
TGAGTGTGTGTGTGTGAGTGTGT  
>hAT-N53\_DR  
TGTGAGTGTGTGTGTGTGAGTGTGTGT  
>STXBP6  
TGTGTGTGTGTGTGTGTGTGTGTGTGTGTGTGT

>hsamiR574\_5p  
TGAGTGTGTGTGTGTGAGTGTGT  
>hAT-N53\_DR  
TGTGAGTGTGTGTGTGTGAGTGTGTGT  
>ARHGEF9  
TGTGTGTGTGTGTGTGTGTGTGTGTGTGTGTGT

>hsamiR574\_5p  
TGAGTGTGTGTGTGTGAGTGTGT  
>hAT-N53\_DR  
TGTGAGTGTGTGTGTGTGAGTGTGTGT  
>CHST11  
TGTGTGTGTGTGTGTGTGTGTGTGTGTGTGTGT

>hsamiR574\_5p  
TGAGTGTGTGTGTGTGAGTGTGT  
>hAT-N53\_DR  
TGTGAGTGTGTGTGTGTGAGTGTGTGT  
>PPP2R1B  
TGTGTGTGTGTGTGTGTGTGTGTGTGTGTGTGT

>hsamiR574\_5p  
TGAGTGTGTGTGTGTGAGTGTGT  
>hAT-N53\_DR  
TGTGAGTGTGTGTGTGTGAGTGTGTGT  
>ZEB1  
TGTGTGTGTGTGTGTGTGTGTGTGTGTGTGTGT

>hsamiR574\_5p  
TGAGTGTGTGTGTGTGAGTGTGT  
>hAT-N53\_DR  
TGTGAGTGTGTGTGTGTGAGTGTGTGT  
>AMOTL1  
TGTGTGTGTGTGTGTGTGTGTGTGTGTGTGTGT

>hsamiR574\_5p  
TGAGTGTGTGTGTGTGAGTGTGT  
>hAT-N53\_DR  
TGTGAGTGTGTGTGTGTGAGTGTGTGT  
>CYLC2  
TGTGTGTGTGTGTGTGTGTGTGTGTGTGTGTGT

>hsamiR574\_5p  
TGAGTGTGTGTGTGTGAGTGTGT  
>hAT-N53\_DR  
TGTGAGTGTGTGTGTGTGAGTGTGTGT  
>KATNAL1  
TGTGTGTGTGTGTGTGTGTGTGTGTGTGTGTGT

>hsamiR574\_5p  
TGAGTGTGTGTGTGTGAGTGTGT  
>hAT-N53\_DR  
TGTGAGTGTGTGTGTGTGAGTGTGTGT  
>IGF1  
TGTGTGTGTGTGTGTGTGTGTGTGTGTGTGTGT

>hsamiR574\_5p  
TGAGTGTGTGTGTGTGAGTGTGT  
>hAT-N53\_DR  
GTGTGAGTGTGTGTGTGTGAGTGTGTGT  
>CYLC2  
GTGTGTGTGTGTGTGTGTGTGTGTGTGTGTGT

>hsamiR574\_5p  
TGAGTGTGTGTGTGTGAGTGTGT  
>hAT-N53\_DR  
GTGTGAGTGTGTGTGTGTGAGTGTGTGT  
>CREB3L2  
GTGTGTGTGTGTGTGTGTGTGTGTGTGTGTGT

>hsamiR574\_5p  
TGAGTGTGTGTGTGTGAGTGTGT  
>hAT-N53\_DR  
GTGTGAGTGTGTGTGTGTGAGTGTGTGT  
>NRXN1  
GTGTGTGTGTGTGTGTGTGTGTGTGTGTGTGT

>hsamiR574\_5p  
TGAGTGTGTGTGTGTGAGTGTGT  
>hAT-N53\_DR  
GTGTGAGTGTGTGTGTGTGAGTGTGTGT  
>ZEB1  
GTGTGTGTGTGTGTGTGTGTGTGTGTGTGTGT

>hsamiR574\_5p  
TGAGTGTGTGTGTGTGAGTGTGT  
>hAT-N53\_DR  
GTGTGAGTGTGTGTGTGTGAGTGTGTGT  
>DCAKD  
GTGTGTGTGTGTGTGTGTGTGTGTGTGTGTGTGTGTGTGTGTGTGT

>hsamiR574\_5p  
TGAGTGTGTGTGTGTGAGTGTGT  
>hAT-N53\_DR  
GTGTGAGTGTGTGTGTGTGAGTGTGTGT  
>CHST11  
GTGTGTGTGTGTGTGTGTGTGTGTGTGTGTGTGTGTGTGTGTGTGT

>hsamiR574\_5p  
TGAGTGTGTGTGTGTGAGTGTGT  
>hAT-N53\_DR  
GTGTGAGTGTGTGTGTGTGAGTGTGTGT  
>BTBD9  
GTGTGTGTGTGTGTGTGTGTGTGTGTGTGTGTGTGTGTGTGTGTGT

>hsamiR574\_5p  
TGAGTGTGTGTGTGTGAGTGTGT  
>hAT-N53\_DR  
GTGTGAGTGTGTGTGTGTGAGTGTGTGT  
>AL020996.1  
GTGTGTGTGTGTGTGTGTGTGTGTGTGTGTGTGTGTGTGTGTGTGT

>hsamiR574\_5p  
TGAGTGTGTGTGTGTGAGTGTGT  
>hAT-N53\_DR  
GTGTGAGTGTGTGTGTGTGAGTGTGTGT  
>LDB3  
GTGTGTGTGTGTGTGTGTGTGTGTGTGTGTGTGTGTGTGTGTGTGT

>hsamiR574\_5p  
TGAGTGTGTGTGTGTGAGTGTGT  
>hAT-N53\_DR  
GTGTGAGTGTGTGTGTGTGAGTGTGTGT  
>C15orf57  
GTGTGTGTGTGTGTGTGTGTGTGTGTGTGTGTGTGTGTGTGTGTGT

>hsamiR574\_5p  
TGAGTGTGTGTGTGTGAGTGTGT  
>hAT-N53\_DR  
GTGTGAGTGTGTGTGTGTGAGTGTGTGT  
>THRA  
GTGTGTGTGTGTGTGTGTGTGTGTGTGTGTGTGTGTGTGTGTGTGT

>hsamiR574\_5p  
TGAGTGTGTGTGTGTGAGTGTGT  
>hAT-N53\_DR  
GTGTGAGTGTGTGTGTGTGAGTGTGTGT  
>AMOTL1  
GTGTGTGTGTGTGTGTGTGTGTGTGTGTGTGTGTGTGTGTGTGTGT

>hsamiR574\_5p  
TGAGTGTGTGTGTGTGAGTGTGT  
>hAT-N53\_DR  
GTGTGAGTGTGTGTGTGTGAGTGTGTGT  
>PPP2R1B  
GTGTGTGTGTGTGTGTGTGTGTGTGTGTGTGTGTGTGTGTGTGTGT

>hsamiR574\_5p  
TGAGTGTGTGTGTGTGAGTGTGT  
>hAT-N53\_DR  
GTGTGAGTGTGTGTGTGTGAGTGTGTGT  
>NMNAT2  
GTGTGTGTGTGTGTGTGTGTGTGTGTGTGTGTGTGTGTGTGTGTGT

>hsamiR574\_5p  
TGAGTGTGTGTGTGTGAGTGTGT  
>hAT-N53\_DR  
GTGTGAGTGTGTGTGTGTGAGTGTGTGT  
>ARHGEF9  
GTGTGTGTGTGTGTGTGTGTGTGTGTGTGTGTGTGTGTGTGTGTGT

>hsamiR574\_5p  
TGAGTGTGTGTGTGTGAGTGTGT  
>hAT-N53\_DR  
GTGTGAGTGTGTGTGTGTGAGTGTGTGT  
>PAX5  
GTGTGTGTGTGTGTGTGTGTGTGTGTGTGTGTGTGTGTGTGTGTGT

>hsamiR574\_5p  
TGAGTGTGTGTGTGTGAGTGTGT  
>hAT-N53\_DR  
GTGTGAGTGTGTGTGTGTGAGTGTGTGT  
>RAB3IP  
GTGTGTGTGTGTGTGTGTGTGTGTGTGTGTGTGTGTGTGTGTGTGT

>hsamiR574\_5p  
TGAGTGTGTGTGTGTGAGTGTGT  
>hAT-N53\_DR  
GTGTGAGTGTGTGTGTGTGAGTGTGTGT  
>STXBP6  
GTGTGTGTGTGTGTGTGTGTGTGTGTGTGTGTGTGTGTGTGTGTGT

>hsamiR574\_5p  
TGAGTGTGTGTGTGTGAGTGTGT  
>hAT-N53\_DR  
GTGTGAGTGTGTGTGTGTGAGTGTGTGT  
>RALGAPB  
GTGTGTGTGTGTGTGTGTGTGTGTGTGTGTGTGTGTGTGTGTGTGT

>hsamiR574\_5p  
TGAGTGTGTGTGTGTGAGTGTGT  
>hAT-N53\_DR  
GTGTGAGTGTGTGTGTGTGAGTGTGTGT  
>AR  
GTGTGTGTGTGTGTGTGTGTGTGTGTGTGTGTGTGTGTGTGTGTGT

>hsamiR574\_5p  
TGAGTGTGTGTGTGTGAGTGTGT  
>hAT-N53\_DR  
GTGTGAGTGTGTGTGTGTGAGTGTGTGT  
>IGF1  
GTGTGTGTGTGTGTGTGTGTGTGTGTGTGTGTGTGTGTGTGTGTGT

>hsamiR574\_5p  
TGAGTGTGTGTGTGTGAGTGTGT  
>hAT-N53\_DR  
GTGTGAGTGTGTGTGTGTGAGTGTGTGT  
>KATNAL1  
GTGTGTGTGTGTGTGTGTGTGTGTGTGTGTGTGTGTGTGTGTGTGT

>hsamiR574\_5p  
TGAGTGTGTGTGTGTGAGTGTGT  
>hAT-N53\_DR  
GTGTGAGTGTGTGTGTGTGAGTGTGTGT  
>XRCC1  
GTGTGTGTGTGTGTGTGTGTGTGTGTGTGTGTGTGTGTGTGTGTGT

>hsamiR574\_5p  
TGAGTGTGTGTGTGTGAGTGTGT  
>hAT-N53\_DR  
GTGTGAGTGTGTGTGTGTGAGTGTGTGT  
>FOXN3  
GTGTGTGTGTGTGTGTGTGTGTGTGTGTGTGTGTGTGTGTGTGTGT

>hsamiR574\_5p  
TGAGTGTGTGTGTGTGAGTGTGT  
>hAT-N53\_DR  
TGTGAGTGTGTGTGTGTGAGTGTGTGT  
>CHST11  
TGTGTGTGTGTGTGTGTGTGTGTGTGTGTGTGTGTGTGTGTGTGTGT

>hsamiR574\_5p  
TGAGTGTGTGTGTGTGAGTGTGT  
>hAT-N53\_DR  
TGTGAGTGTGTGTGTGTGAGTGTGTGT  
>PPP2R1B  
TGTGTGTGTGTGTGTGTGTGTGTGTGTGTGTGTGTGTGTGTGTGTGT

>hsamiR574\_5p  
TGAGTGTGTGTGTGTGAGTGTGT  
>hAT-N53\_DR  
TGTGAGTGTGTGTGTGTGAGTGTGTGT  
>ZEB1  
TGTGTGTGTGTGTGTGTGTGTGTGTGTGTGTGTGTGTGTGTGTGTGT

>hsamiR574\_5p  
TGAGTGTGTGTGTGTGAGTGTGT  
>hAT-N53\_DR  
TGTGAGTGTGTGTGTGTGAGTGTGTGT  
>ARHGEF9  
TGTGTGTGTGTGTGTGTGTGTGTGTGTGTGTGTGTGTGTGTGTGTGT

>hsamiR574\_5p  
TGAGTGTGTGTGTGTGAGTGTGT  
>hAT-N53\_DR  
TGTGAGTGTGTGTGTGTGAGTGTGTGT  
>AMOTL1  
TGTGTGTGTGTGTGTGTGTGTGTGTGTGTGTGTGTGTGTGTGTGTGT

>hsamiR574\_5p  
TGAGTGTGTGTGTGTGAGTGTGT  
>hAT-N53\_DR  
TGTGAGTGTGTGTGTGTGAGTGTGTGT  
>STXBP6  
TGTGTGTGTGTGTGTGTGTGTGTGTGTGTGTGTGTGTGTGTGTGTGT

>hsamiR574\_5p  
TGAGTGTGTGTGTGTGAGTGTGT  
>hAT-N53\_DR  
TGTGAGTGTGTGTGTGTGAGTGTGTGT  
>KATNAL1  
TGTGTGTGTGTGTGTGTGTGTGTGTGTGTGTGTGTGTGTGTGTGTGT

>hsamiR574\_5p  
TGAGTGTGTGTGTGTGAGTGTGT  
>hAT-N53\_DR  
TGTGAGTGTGTGTGTGTGAGTGTGTGT  
>IGF1  
TGTGTGTGTGTGTGTGTGTGTGTGTGTGTGTGTGTGTGTGTGTGTGT

>hsamiR574\_5p  
TGAGTGTGTGTGTGTGAGTGTGT  
>hAT-N53\_DR  
GTGTGAGTGTGTGTGTGTGAGTGTGTGT  
>CYLC2  
GTGTGTGTGTGTGTGTGTGTGTGTGTGTGTGTGTGTGTGTGTGTGT

>hsamiR574\_5p  
TGAGTGTGTGTGTGTGAGTGTGT  
>hAT-N53\_DR  
GTGTGAGTGTGTGTGTGTGAGTGTGTGT  
>CREB3L2  
GTGTGTGTGTGTGTGTGTGTGTGTGTGTGTGTGTGTGTGTGTGTGT

>hsamiR574\_5p  
TGAGTGTGTGTGTGTGAGTGTGT  
>hAT-N53\_DR  
GTGTGAGTGTGTGTGTGTGAGTGTGTGT  
>NRXN1  
GTGTGTGTGTGTGTGTGTGTGTGTGTGTGTGTGTGTGTGTGTGTGT

>hsamiR574\_5p  
TGAGTGTGTGTGTGTGAGTGTGT  
>hAT-N53\_DR  
GTGTGAGTGTGTGTGTGTGAGTGTGTGT  
>ZEB1  
GTGTGTGTGTGTGTGTGTGTGTGTGTGTGTGTGTGTGTGTGTGTGT

>hsamiR574\_5p  
TGAGTGTGTGTGTGTGAGTGTGT  
>hAT-N53\_DR  
GTGTGAGTGTGTGTGTGTGAGTGTGTGT  
>DCAKD  
GTGTGTGTGTGTGTGTGTGTGTGTGTGTGTGTGTGTGTGTGTGTGT

>hsamiR574\_5p  
TGAGTGTGTGTGTGTGAGTGTGT  
>hAT-N53\_DR  
GTGTGAGTGTGTGTGTGTGAGTGTGTGT  
>BTBD9  
GTGTGTGTGTGTGTGTGTGTGTGTGTGTGTGTGTGTGTGTGTGTGT

>hsamiR574\_5p  
TGAGTGTGTGTGTGTGAGTGTGT  
>hAT-N53\_DR  
GTGTGAGTGTGTGTGTGTGAGTGTGTGT  
>LDB3  
GTGTGTGTGTGTGTGTGTGTGTGTGTGTGTGTGTGTGTGTGTGTGT





>hsamiR574\_5p  
TGAGTGTGTGTGTGTGAGTGTGT  
>hAT-N53\_DR  
GTGTGAGTGTGTGTGTGTGAGTGTGTGT  
>PAX5  
GTGTGTGTGTGTGTGTGTGTGTGTGTGTGTGTGTGTGTGTGTGTGT

>hsamiR574\_5p  
TGAGTGTGTGTGTGTGAGTGTGT  
>hAT-N53\_DR  
GTGTGAGTGTGTGTGTGTGAGTGTGTGT  
>IGF1  
GTGTGTGTGTGTGTGTGTGTGTGTGTGTGTGTGTGTGTGTGTGTGT

>hsamiR574\_5p  
TGAGTGTGTGTGTGTGAGTGTGT  
>hAT-N53\_DR  
GTGTGAGTGTGTGTGTGTGAGTGTGTGT  
>KATNAL1  
GTGTGTGTGTGTGTGTGTGTGTGTGTGTGTGTGTGTGTGTGTGTGT

>hsamiR574\_5p  
TGAGTGTGTGTGTGTGAGTGTGT  
>hAT-N53\_DR  
GTGTGAGTGTGTGTGTGTGAGTGTGTGT  
>XRCC1  
GTGTGTGTGTGTGTGTGTGTGTGTGTGTGTGTGTGTGTGTGTGTGT

>hsamiR574\_5p  
TGAGTGTGTGTGTGTGAGTGTGT  
>hAT-N53\_DR  
GTGTGAGTGTGTGTGTGTGAGTGTGTGT  
>FOXN3  
GTGTGTGTGTGTGTGTGTGTGTGTGTGTGTGTGTGTGTGTGTGTGT

>hsamiR574\_5p  
TGAGTGTGTGTGTGTGAGTGTGT  
>hAT-N53\_DR  
TGTGAGTGTGTGTGTGTGAGTGTGTGT  
>AMOTL1  
TGTGTGTGTGTGTGTGTGTGTGTGTGTGTGTGTGTGTGTGTGTGTGT

>hsamiR574\_5p  
TGAGTGTGTGTGTGTGAGTGTGT  
>hAT-N53\_DR  
TGTGAGTGTGTGTGTGTGAGTGTGTGT  
>PPP2R1B  
TGTGTGTGTGTGTGTGTGTGTGTGTGTGTGTGTGTGTGTGTGTGTGT

>hsamiR574\_5p  
TGAGTGTGTGTGTGTGAGTGTGT  
>hAT-N53\_DR  
TGTGAGTGTGTGTGTGTGAGTGTGTGT  
>CHST11  
TGTGTGTGTGTGTGTGTGTGTGTGTGTGTGTGTGTGTGTGTGTGTGT

>hsamiR574\_5p  
TGAGTGTGTGTGTGTGAGTGTGT  
>hAT-N53\_DR  
TGTGAGTGTGTGTGTGTGAGTGTGTGT  
>CYLC2  
TGTGTGTGTGTGTGTGTGTGTGTGTGTGTGTGTGTGTGTGTGTGTGT

>hsamiR574\_5p  
TGAGTGTGTGTGTGTGAGTGTGT  
>hAT-N53\_DR  
TGTGAGTGTGTGTGTGTGAGTGTGTGT  
>ZEB1  
TGTGTGTGTGTGTGTGTGTGTGTGTGTGTGTGTGTGTGTGTGTGTGT

>hsamiR574\_5p  
TGAGTGTGTGTGTGTGAGTGTGT  
>hAT-N53\_DR  
TGTGAGTGTGTGTGTGTGAGTGTGTGT  
>IGF1  
TGTGTGTGTGTGTGTGTGTGTGTGTGTGTGTGTGTGTGTGTGTGTGT

>hsamiR574\_5p  
TGAGTGTGTGTGTGTGAGTGTGT  
>hAT-N53\_DR  
TGTGAGTGTGTGTGTGTGAGTGTGTGT  
>KATNAL1  
TGTGTGTGTGTGTGTGTGTGTGTGTGTGTGTGTGTGTGTGTGTGTGT

>hsamiR574\_5p  
TGAGTGTGTGTGTGTGAGTGTGT  
>hAT-N53\_DR  
GTGTGAGTGTGTGTGTGTGAGTGTGTGT  
>CYLC2  
GTGTGTGTGTGTGTGTGTGTGTGTGTGTGTGTGTGTGTGTGTGTGT

>hsamiR574\_5p  
TGAGTGTGTGTGTGTGAGTGTGT  
>hAT-N53\_DR  
GTGTGAGTGTGTGTGTGTGAGTGTGTGT  
>NRXN1  
GTGTGTGTGTGTGTGTGTGTGTGTGTGTGTGTGTGTGTGTGTGTGT

>hsamiR574\_5p  
TGAGTGTGTGTGTGTGAGTGTGT  
>hAT-N53\_DR  
GTGTGAGTGTGTGTGTGTGAGTGTGTGT  
>ZEB1  
GTGTGTGTGTGTGTGTGTGTGTGTGTGTGTGTGTGTGTGTGTGTGTGT

>hsamiR574\_5p  
TGAGTGTGTGTGTGTGAGTGTGT  
>hAT-N53\_DR  
GTGTGAGTGTGTGTGTGTGAGTGTGTGT  
>DCAKD  
GTGTGTGTGTGTGTGTGTGTGTGTGTGTGTGTGTGTGTGTGTGTGTGT

>hsamiR574\_5p  
TGAGTGTGTGTGTGTGAGTGTGT  
>hAT-N53\_DR  
GTGTGAGTGTGTGTGTGTGAGTGTGTGT  
>BTBD9  
GTGTGTGTGTGTGTGTGTGTGTGTGTGTGTGTGTGTGTGTGTGTGTGT

>hsamiR574\_5p  
TGAGTGTGTGTGTGTGAGTGTGT  
>hAT-N53\_DR  
GTGTGAGTGTGTGTGTGTGAGTGTGTGT  
>LDB3  
GTGTGTGTGTGTGTGTGTGTGTGTGTGTGTGTGTGTGTGTGTGTGTGT

>hsamiR574\_5p  
TGAGTGTGTGTGTGTGAGTGTGT  
>hAT-N53\_DR  
GTGTGAGTGTGTGTGTGTGAGTGTGTGT  
>C15orf57  
GTGTGTGTGTGTGTGTGTGTGTGTGTGTGTGTGTGTGTGTGTGTGTGT

>hsamiR574\_5p  
TGAGTGTGTGTGTGTGAGTGTGT  
>hAT-N53\_DR  
GTGTGAGTGTGTGTGTGTGAGTGTGTGT  
>NMNAT2  
GTGTGTGTGTGTGTGTGTGTGTGTGTGTGTGTGTGTGTGTGTGTGTGT

>hsamiR574\_5p  
TGAGTGTGTGTGTGTGAGTGTGT  
>hAT-N53\_DR  
GTGTGAGTGTGTGTGTGTGAGTGTGTGT  
>AL020996.1  
GTGTGTGTGTGTGTGTGTGTGTGTGTGTGTGTGTGTGTGTGTGTGTGT

>hsamiR574\_5p  
TGAGTGTGTGTGTGTGAGTGTGT  
>hAT-N53\_DR  
GTGTGAGTGTGTGTGTGTGAGTGTGTGT  
>THRA  
GTGTGTGTGTGTGTGTGTGTGTGTGTGTGTGTGTGTGTGTGTGTGTGT

>hsamiR574\_5p  
TGAGTGTGTGTGTGTGAGTGTGT  
>hAT-N53\_DR  
GTGTGAGTGTGTGTGTGTGAGTGTGTGT  
>PPP2R1B  
GTGTGTGTGTGTGTGTGTGTGTGTGTGTGTGTGTGTGTGTGTGTGTGT

>hsamiR574\_5p  
TGAGTGTGTGTGTGTGAGTGTGT  
>hAT-N53\_DR  
GTGTGAGTGTGTGTGTGTGAGTGTGTGT  
>IGF1  
GTGTGTGTGTGTGTGTGTGTGTGTGTGTGTGTGTGTGTGTGTGTGTGT

>hsamiR574\_5p  
TGAGTGTGTGTGTGTGAGTGTGT  
>hAT-N53\_DR  
GTGTGAGTGTGTGTGTGTGAGTGTGTGT  
>KATNAL1  
GTGTGTGTGTGTGTGTGTGTGTGTGTGTGTGTGTGTGTGTGTGTGTGT

>hsamiR574\_5p  
TGAGTGTGTGTGTGTGAGTGTGT  
>hAT-N53\_DR  
GTGTGAGTGTGTGTGTGTGAGTGTGTGT  
>FOXN3  
GTGTGTGTGTGTGTGTGTGTGTGTGTGTGTGTGTGTGTGTGTGTGTGT

>hsamiR574\_5p  
TGAGTGTGTGTGTGTGAGTGTGT  
>hAT-N53\_DR  
TGTGAGTGTGTGTGTGTGAGTGTGTGT  
>ZEB1  
TGTGTGTGTGTGTGTGTGTGTGTGTGTGTGTGTGTGTGTGTGTGTGTGT

>hsamiR574\_5p  
TGAGTGTGTGTGTGTGAGTGTGT  
>hAT-N53\_DR  
TGTGAGTGTGTGTGTGTGAGTGTGTGT  
>CYLC2  
TGTGTGTGTGTGTGTGTGTGTGTGTGTGTGTGTGTGTGTGTGTGTGTGT

>hsamiR574\_5p  
TGAGTGTGTGTGTGTGAGTGTGT  
>hAT-N53\_DR  
TGTGAGTGTGTGTGTGTGAGTGTGTGT  
>PPP2R1B  
TGTGTGTGTGTGTGTGTGTGTGTGTGTGTGTGTGTGTGTGTGTGTGT

>hsamiR574\_5p  
TGAGTGTGTGTGTGTGAGTGTGT  
>hAT-N53\_DR  
TGTGAGTGTGTGTGTGTGAGTGTGTGT  
>IGF1  
TGTGTGTGTGTGTGTGTGTGTGTGTGTGTGTGTGTGTGTGTGTGTGT

>hsamiR574\_5p  
TGAGTGTGTGTGTGTGAGTGTGT  
>hAT-N53\_DR  
TGTGAGTGTGTGTGTGTGAGTGTGTGT  
>KATNAL1  
TGTGTGTGTGTGTGTGTGTGTGTGTGTGTGTGTGTGTGTGTGTGTGT

>hsamiR574\_5p  
TGAGTGTGTGTGTGTGAGTGTGT  
>hAT-N53\_DR  
GTGTGAGTGTGTGTGTGTGAGTGTGTGT  
>CYLC2  
GTGTGTGTGTGTGTGTGTGTGTGTGTGTGTGTGTGTGTGTGTGTGT

>hsamiR574\_5p  
TGAGTGTGTGTGTGTGAGTGTGT  
>hAT-N53\_DR  
GTGTGAGTGTGTGTGTGTGAGTGTGTGT  
>NRXN1  
GTGTGTGTGTGTGTGTGTGTGTGTGTGTGTGTGTGTGTGTGTGTGT

>hsamiR574\_5p  
TGAGTGTGTGTGTGTGAGTGTGT  
>hAT-N53\_DR  
GTGTGAGTGTGTGTGTGTGAGTGTGTGT  
>DCAKD  
GTGTGTGTGTGTGTGTGTGTGTGTGTGTGTGTGTGTGTGTGTGTGT

>hsamiR574\_5p  
TGAGTGTGTGTGTGTGAGTGTGT  
>hAT-N53\_DR  
GTGTGAGTGTGTGTGTGTGAGTGTGTGT  
>BTBD9  
GTGTGTGTGTGTGTGTGTGTGTGTGTGTGTGTGTGTGTGTGTGTGT

>hsamiR574\_5p  
TGAGTGTGTGTGTGTGAGTGTGT  
>hAT-N53\_DR  
GTGTGAGTGTGTGTGTGTGAGTGTGTGT  
>C15orf57  
GTGTGTGTGTGTGTGTGTGTGTGTGTGTGTGTGTGTGTGTGTGTGTGT

>hsamiR574\_5p  
TGAGTGTGTGTGTGTGAGTGTGT  
>hAT-N53\_DR  
GTGTGAGTGTGTGTGTGTGAGTGTGTGT  
>NMNAT2  
GTGTGTGTGTGTGTGTGTGTGTGTGTGTGTGTGTGTGTGTGTGTGTGT

>hsamiR574\_5p  
TGAGTGTGTGTGTGTGAGTGTGT  
>hAT-N53\_DR  
GTGTGAGTGTGTGTGTGTGAGTGTGTGT  
>ZEB1  
GTGTGTGTGTGTGTGTGTGTGTGTGTGTGTGTGTGTGTGTGTGTGTGT

>hsamiR574\_5p  
TGAGTGTGTGTGTGTGAGTGTGT  
>hAT-N53\_DR  
GTGTGAGTGTGTGTGTGTGAGTGTGTGT  
>AL020996.1  
GTGTGTGTGTGTGTGTGTGTGTGTGTGTGTGTGTGTGTGTGTGTGTGT

>hsamiR574\_5p  
TGAGTGTGTGTGTGTGAGTGTGT  
>hAT-N53\_DR  
GTGTGAGTGTGTGTGTGTGAGTGTGTGT  
>PPP2R1B  
GTGTGTGTGTGTGTGTGTGTGTGTGTGTGTGTGTGTGTGTGTGTGTGT

>hsamiR574\_5p  
TGAGTGTGTGTGTGTGAGTGTGT  
>hAT-N53\_DR  
GTGTGAGTGTGTGTGTGTGAGTGTGTGT  
>LDB3  
GTGTGTGTGTGTGTGTGTGTGTGTGTGTGTGTGTGTGTGTGTGTGTGT

>hsamiR574\_5p  
TGAGTGTGTGTGTGTGAGTGTGT  
>hAT-N53\_DR  
GTGTGAGTGTGTGTGTGTGAGTGTGTGT  
>KATNAL1  
GTGTGTGTGTGTGTGTGTGTGTGTGTGTGTGTGTGTGTGTGTGTGTGT

>hsamiR574\_5p  
TGAGTGTGTGTGTGTGAGTGTGT  
>hAT-N53\_DR  
TGTGAGTGTGTGTGTGTGAGTGTGTGT  
>CYLC2  
TGTGTGTGTGTGTGTGTGTGTGTGTGTGTGTGTGTGTGTGTGTGTGT

>hsamiR574\_5p  
TGAGTGTGTGTGTGTGAGTGTGT  
>hAT-N53\_DR  
TGTGAGTGTGTGTGTGTGAGTGTGTGT  
>ZEB1  
TGTGTGTGTGTGTGTGTGTGTGTGTGTGTGTGTGTGTGTGTGTGTGT

>hsamiR574\_5p  
TGAGTGTGTGTGTGTGAGTGTGT  
>hAT-N53\_DR  
TGTGAGTGTGTGTGTGTGAGTGTGTGT  
>PPP2R1B  
TGTGTGTGTGTGTGTGTGTGTGTGTGTGTGTGTGTGTGTGTGTGTGT

>hsamiR574\_5p  
TGAGTGTGTGTGTGTGAGTGTGT  
>hAT-N53\_DR  
GTGTGAGTGTGTGTGTGTGAGTGTGTGT  
>CYLC2  
GTGTGTGTGTGTGTGTGTGTGTGTGTGTGTGTGTGTGTGTGTGTGT

>hsamiR574\_5p  
TGAGTGTGTGTGTGTGAGTGTGT  
>hAT-N53\_DR  
GTGTGAGTGTGTGTGTGTGAGTGTGTGT  
>DCAKD  
GTGTGTGTGTGTGTGTGTGTGTGTGTGTGTGTGTGTGTGTGTGTGT

>hsamiR574\_5p  
TGAGTGTGTGTGTGTGAGTGTGT  
>hAT-N53\_DR  
GTGTGAGTGTGTGTGTGTGAGTGTGTGT  
>BTBD9  
GTGTGTGTGTGTGTGTGTGTGTGTGTGTGTGTGTGTGTGTGTGTGT

>hsamiR574\_5p  
TGAGTGTGTGTGTGTGAGTGTGT  
>hAT-N53\_DR  
GTGTGAGTGTGTGTGTGTGAGTGTGTGT  
>C15orf57  
GTGTGTGTGTGTGTGTGTGTGTGTGTGTGTGTGTGTGTGTGTGTGT









>hsamiR574\_5p  
TGAGTGTGTGTGTGTGAGTGTGT  
>hAT-N53\_DR  
GTGTGAGTGTGTGTGTGTGAGTGTGTGT  
>LDB3  
GTGTGTGTGTGTGTGTGTGTGTGTGTGTGTGTGTGTGTGTGTGTGTGTGTGTGTGTGTGTGT

>hsamiR574\_5p  
TGAGTGTGTGTGTGTGAGTGTGT  
>hAT-N53\_DR  
CGGGCGTGTGAGTGTGTGTGTGTGAGTGTGTGT  
>BTBD9  
CGGGTGTGTGTGTGTGTGTGTGTGTGTGTGTGTGTGTGTGTGTGTGTGTGTGTGTGTGTGTGT

>hsamiR574\_5p  
TGAGTGTGTGTGTGTGAGTGTGT  
>hAT-N53\_DR  
CGGGCGTGTGAGTGTGTGTGTGTGAGTGTGTGT  
>BTBD9  
CGGGTGTGTGTGTGTGTGTGTGTGTGTGTGTGTGTGTGTGTGTGTGTGTGTGTGTGTGTGTGT

>hsamiR574\_5p  
TGAGTGTGTGTGTGTGAGTGTGT  
>hAT-N53\_DR  
CGTGTGAGTGTGTGTGTGTGAGTGTGTGT  
>DCAKD  
CGTGTGTGTGTGTGTGTGTGTGTGTGTGTGTGTGTGTGTGTGTGTGTGTGTGTGTGTGTGT

>hsamiR574\_5p  
TGAGTGTGTGTGTGTGAGTGTGT  
>hAT-N53\_DR  
CGTGTGAGTGTGTGTGTGTGAGTGTGTGT  
>NRXN1  
CGTGTGTGTGTGTGTGTGTGTGTGTGTGTGTGTGTGTGTGTGTGTGTGTGTGTGTGTGTGT

>hsamiR574\_5p  
TGAGTGTGTGTGTGTGAGTGTGT  
>hAT-N53\_DR  
CGTGTGAGTGTGTGTGTGTGAGTGTGTGT  
>LDB3  
CGTGTGTGTGTGTGTGTGTGTGTGTGTGTGTGTGTGTGTGTGTGTGTGTGTGTGTGTGTGT

>hsamiR574\_5p  
TGAGTGTGTGTGTGTGAGTGTGT  
>hAT-N53\_DR  
GGCGTGTGAGTGTGTGTGTGTGAGTGTGTGT  
>C15orf57  
GGCGTGTGTGTGTGTGTGTGTGTGTGTGTGTGTGTGTGTGTGTGTGTGTGTGTGTGTGTGTGT



















>hsamiR574\_5p  
TGAGTGTGTGTGTGTGAGTGTGT  
>hAT-N53\_DR  
CGTGTGAGTGTGTGTGTGTGAGTGTGTGT  
>LDB3  
CGTGTGTGTGTGTGTGTGTGTGTGTGTGTGTGTGT

>hsamiR574\_5p  
TGAGTGTGTGTGTGTGAGTGTGT  
>hAT-N53\_DR  
CGTGTGAGTGTGTGTGTGTGAGTGTGTGT  
>AL020996.1  
CGTGTGTGTGTGTGTGTGTGTGTGTGTGTGTGTGT

>hsamiR574\_5p  
TGAGTGTGTGTGTGTGAGTGTGT  
>hAT-N53\_DR  
CGTGTGAGTGTGTGTGTGTGAGTGTGTGT  
>DCAKD  
CGTGTGTGTGTGTGTGTGTGTGTGTGTGTGTGTGT

>hsamiR574\_5p  
TGAGTGTGTGTGTGTGAGTGTGT  
>hAT-N53\_DR  
CGTGTGAGTGTGTGTGTGTGAGTGTGTGT  
>NRXN1  
CGTGTGTGTGTGTGTGTGTGTGTGTGTGTGTGTGT

>hsamiR574\_5p  
TGAGTGTGTGTGTGTGAGTGTGT  
>hAT-N53\_DR  
CGTGTGAGTGTGTGTGTGTGAGTGTGTGT  
>THRA  
CGTGTGTGTGTGTGTGTGTGTGTGTGTGTGTGTGT

>hsamiR574\_5p  
TGAGTGTGTGTGTGTGAGTGTGT  
>hAT-N53\_DR  
CGTGTGAGTGTGTGTGTGTGAGTGTGTGT  
>CREB3L2  
CGTGTGTGTGTGTGTGTGTGTGTGTGTGTGTGTGT

>hsamiR574\_5p  
TGAGTGTGTGTGTGTGAGTGTGT  
>hAT-N53\_DR  
CGTGTGAGTGTGTGTGTGTGAGTGTGTGT  
>XRCC1  
CGTGTGTGTGTGTGTGTGTGTGTGTGTGTGTGTGT

>hsamiR574\_5p  
TGAGTGTGTGTGTGTGAGTGTGT  
>hAT-N53\_DR  
CGTGTGAGTGTGTGTGTGTGAGTGTGTGT  
>FOXN3  
CGTGTGTGTGTGTGTGTGTGTGTGTGTGTGTGTGT

>hsamiR574\_5p  
TGAGTGTGTGTGTGTGAGTGTGT  
>hAT-N53\_DR  
GCGTGTGAGTGTGTGTGTGTGAGTGTGTGT  
>AR  
GCGTGTGTGTGTGTGTGTGTGTGTGTGTGTGTGTGT

>hsamiR574\_5p  
TGAGTGTGTGTGTGTGAGTGTGT  
>hAT-N53\_DR  
GCGTGTGAGTGTGTGTGTGTGAGTGTGTGT  
>CHRDL1  
GCGTGTGTGTGTGTGTGTGTGTGTGTGTGTGTGTGT

>hsamiR574\_5p  
TGAGTGTGTGTGTGTGAGTGTGT  
>hAT-N53\_DR  
GGCGTGTGAGTGTGTGTGTGTGAGTGTGTGT  
>C15orf57  
GGCGTGTGTGTGTGTGTGTGTGTGTGTGTGTGTGTGT

>hsamiR574\_5p  
TGAGTGTGTGTGTGTGAGTGTGT  
>hAT-N53\_DR  
GGCGTGTGAGTGTGTGTGTGTGAGTGTGTGT  
>NMNAT2  
GGCGTGTGTGTGTGTGTGTGTGTGTGTGTGTGTGTGT

>hsamiR574\_5p  
TGAGTGTGTGTGTGTGAGTGTGT  
>hAT-N53\_DR  
GTGTGAGTGTGTGTGTGTGAGTGTGTGT  
>AR  
AGTGTGTGTGTATGTGTGTGTGTGTGAGAGAGAGAGAGAGTGTGTGTGTGTTGGGGGGGGAGAGAGAGAGAGA  
GCGTGTGTGTGTGTGTGTGTGTGTGTGTGTGTGTGT

>hsamiR574\_5p  
TGAGTGTGTGTGTGTGAGTGTGT  
>hAT-N53\_DR  
GTGTGAGTGTGTGTGTGTGAGTGTGTGT  
>AR

GTGTGTGTGTGTGAGAGAGAGAGAGAGAGAGTGTGTGTGTGTTGGGGGGGAGAGAGAGAGAGAGCGTGTGTGTGT  
GTGTGTGTGTGTGTGTGTGTGTGTGT

>hsamiR574\_5p  
TGAGTGTGTGTGTGTGAGTGTGT  
>hAT-N53\_DR  
GTGTGAGTGTGTGTGTGTGAGTGTGTGT  
>AR  
GAGTGTGTGTGTGTTGGGGGGGAGAGAGAGAGAGAGCGTGTGTGTGTGTGTGTGTGTGTGTGTGTGTGTGTGTGT

>hsamiR574\_5p  
TGAGTGTGTGTGTGTGAGTGTGT  
>hAT-N53\_DR  
AGTGTGTGTGTGTGAGTGTGTGT  
>RAB3IP  
AGTGTGTGTGTGTGTGTGTGTGTGTGTGTGTGTGTGTGTGT

>hsamiR574\_5p  
TGAGTGTGTGTGTGTGAGTGTGT  
>hAT-N53\_DR  
AGTGTGTGTGTGTGAGTGTGTGT  
>KATNAL1  
AGTGTGTGTGTGTGTGTGTGTGTGTGTGTGTGTGTGTGTGT

>hsamiR574\_5p  
TGAGTGTGTGTGTGTGAGTGTGT  
>hAT-N53\_DR  
GAGTGTGTGTGTGTGAGTGTGTGT  
>NMNAT2  
GAGTGTGTGTGTGTGTGTGTGTGTGTGTGTGTGTGTGTGT

>hsamiR574\_5p  
TGAGTGTGTGTGTGTGAGTGTGT  
>hAT-N53\_DR  
GAGTGTGTGTGTGTGAGTGTGTGT  
>RALGAPB  
GAGTGTGTGTGTGTGTGTGTGTGTGTGTGTGTGTGTGTGT

>hsamiR574\_5p  
TGAGTGTGTGTGTGTGAGTGTGT  
>hAT-N53\_DR  
GTGAGTGTGTGTGTGTGAGTGTGTGT  
>PAX5  
GTGAGTGTGTGTGTGTGTGTGTGTGTGTGTGTGTGTGTGTGT

>hsamiR574\_5p  
TGAGTGTGTGTGTGTGAGTGTGT  
>hAT-N53\_DR

GTGAGTGTGTGTGTGTGAGTGTGTGT  
>IGF1  
GTGAATGTGTGTGTGTGTGTGTGTGTGTGTGTGTGTGTGT

>hsamiR574\_5p  
TGAGTGTGTGTGTGTGAGTGTGT  
>hAT-N53\_DR  
CGGGCGTGTGAGTGTGTGTGTGTGAGTGTGTGT  
>BTBD9  
CGGGTGTGTGTGTGTGTGTGTGTGTGTGTGTGTGTGT

>hsamiR574\_5p  
TGAGTGTGTGTGTGTGAGTGTGT  
>hAT-N53\_DR  
CGTGTGAGTGTGTGTGTGTGAGTGTGTGT  
>THRA  
CGTGTGTGTGTGTGTGTGTGTGTGTGTGTGTGTGTGT

>hsamiR574\_5p  
TGAGTGTGTGTGTGTGAGTGTGT  
>hAT-N53\_DR  
CGTGTGAGTGTGTGTGTGTGAGTGTGTGT  
>DCAKD  
CGTGTGTGTGTGTGTGTGTGTGTGTGTGTGTGTGTGT

>hsamiR574\_5p  
TGAGTGTGTGTGTGTGAGTGTGT  
>hAT-N53\_DR  
CGTGTGAGTGTGTGTGTGTGAGTGTGTGT  
>LDB3  
CGTGTGTGTGTGTGTGTGTGTGTGTGTGTGTGTGTGT

>hsamiR574\_5p  
TGAGTGTGTGTGTGTGAGTGTGT  
>hAT-N53\_DR  
CGTGTGAGTGTGTGTGTGTGAGTGTGTGT  
>AL020996.1  
CGTGTGTGTGTGTGTGTGTGTGTGTGTGTGTGTGTGT

>hsamiR574\_5p  
TGAGTGTGTGTGTGTGAGTGTGT  
>hAT-N53\_DR  
CGTGTGAGTGTGTGTGTGTGAGTGTGTGT  
>CREB3L2  
CGTGTGTGTGTGTGTGTGTGTGTGTGTGTGTGTGTGT

>hsamiR574\_5p  
TGAGTGTGTGTGTGTGAGTGTGT



>hAT-N53\_DR  
CGTGTGAGTGTGTGTGTGAGTGTGTGT  
>NRXN1  
CGTGTGTGTGTGTGTGTGTGTGTGTGTGTGT

>hsamiR574\_5p  
TGAGTGTGTGTGTGTGAGTGTGT  
>hAT-N53\_DR  
CGTGTGAGTGTGTGTGTGAGTGTGTGT  
>FOXN3  
CGTGTGTGTGTGTGTGTGTGTGTGTGTGTGT

>hsamiR574\_5p  
TGAGTGTGTGTGTGTGAGTGTGT  
>hAT-N53\_DR  
CGTGTGAGTGTGTGTGTGAGTGTGTGT  
>XRCC1  
CGTGTGTGTGTGTGTGTGTGTGTGTGTGTGT

>hsamiR574\_5p  
TGAGTGTGTGTGTGTGAGTGTGT  
>hAT-N53\_DR  
GCGTGTGAGTGTGTGTGTGAGTGTGTGT  
>AR  
GCGTGTGTGTGTGTGTGTGTGTGTGTGTGTGT

>hsamiR574\_5p  
TGAGTGTGTGTGTGTGAGTGTGT  
>hAT-N53\_DR  
GCGTGTGAGTGTGTGTGTGAGTGTGTGT  
>NDUFB5  
GCGTGTGTGTGTGTGTGTGTGTGTGTGTGTGT

>hsamiR574\_5p  
TGAGTGTGTGTGTGTGAGTGTGT  
>hAT-N53\_DR  
GCGTGTGAGTGTGTGTGTGAGTGTGTGT  
>CHRD1  
GCGTGTGTGTGTGTGTGTGTGTGTGTGTGTGT

>hsamiR574\_5p  
TGAGTGTGTGTGTGTGAGTGTGT  
>hAT-N53\_DR  
GGCGTGTGAGTGTGTGTGTGAGTGTGTGT  
>C15orf57  
GGCGTGTGTGTGTGTGTGTGTGTGTGTGTGTGT

>hsamiR574\_5p

TGAGTGTGTGTGTGAGTGTGT  
>hAT-N53\_DR  
GGGCGTGTGAGTGTGTGTGTGAGTGTGTGT  
>NMNAT2  
GGGCGTGTGTGTGTGTGTGTGTGTGTGTGTGTGTGT

>hsamiR574\_5p  
TGAGTGTGTGTGTGTGAGTGTGT  
>hAT-N53\_DR  
GTGTGAGTGTGTGTGTGTGAGTGTGTGT  
>AR  
AGTGTGTGTGTATGTGTGTGTGTGTGAGAGAGAGAGAGAGTGTGTGTGTGTTGGGGGGGGAGAGAGAGAGAGA  
GCGTGTGTGTGTGTGTGTGTGTGTGTGTGTGTGTGT

>hsamiR574\_5p  
TGAGTGTGTGTGTGTGAGTGTGT  
>hAT-N53\_DR  
GTGTGAGTGTGTGTGTGTGAGTGTGTGT  
>AR  
GTGTGTGTGTGTGAGAGAGAGAGAGAGTGTGTGTGTGTTGGGGGGGGAGAGAGAGAGAGAGCGTGTGTGTGT  
GTGTGTGTGTGTGTGTGTGTGT

>hsamiR574\_5p  
TGAGTGTGTGTGTGTGAGTGTGT  
>hAT-N53\_DR  
GTGTGAGTGTGTGTGTGTGAGTGTGTGT  
>AR  
GAGTGTGTGTGTGTTGGGGGGGGAGAGAGAGAGAGAGCGTGTGTGTGTGTGTGTGTGTGTGTGTGTGTGT

>hsamiR574\_5p  
TGAGTGTGTGTGTGTGAGTGTGT  
>hAT-N53\_DR  
AGTGTGTGTGTGTGAGTGTGTGT  
>RAB3IP  
AGTGTGTGTGTGTGTGTGTGTGTGTGTGTGTGTGT

>hsamiR574\_5p  
TGAGTGTGTGTGTGTGAGTGTGT  
>hAT-N53\_DR  
AGTGTGTGTGTGTGAGTGTGTGT  
>KATNAL1  
AGTGTGTGTGTGTGTGTGTGTGTGTGTGTGTGTGT

>hsamiR574\_5p  
TGAGTGTGTGTGTGTGAGTGTGT  
>hAT-N53\_DR  
GAGTGTGTGTGTGTGAGTGTGTGT  
>NMNAT2

GAGTGTGTGTGTGTGTGTGTGTGTGTGTGTGTGT

>hsamiR574\_5p

TGAGTGTGTGTGTGTGAGTGTGT

>hAT-N53\_DR

GAGTGTGTGTGTGTGAGTGTGTGT

>RALGAPB

GAGTGTGTGTGTGTGTGTGTGTGTGTGTGTGTGT

>hsamiR574\_5p

TGAGTGTGTGTGTGTGAGTGTGT

>hAT-N53\_DR

GTGAGTGTGTGTGTGTGAGTGTGTGT

>PAX5

GTGAGTGTGTGTGTGTGTGTGTGTGTGTGTGTGTGT

>hsamiR574\_5p

TGAGTGTGTGTGTGTGAGTGTGT

>hAT-N53\_DR

GTGAGTGTGTGTGTGTGAGTGTGTGT

>IGF1

GTGAATGTGTGTGTGTGTGTGTGTGTGTGTGTGTGTGT

>hsamiR574\_5p

TGAGTGTGTGTGTGTGAGTGTGT

>hAT-N53\_DR

CGGGCGTGTGAGTGTGTGTGTGTGAGTGTGTGTGT

>BTBD9

CGGGTGTGTGTGTGTGTGTGTGTGTGTGTGTGTGT

>hsamiR574\_5p

TGAGTGTGTGTGTGTGAGTGTGT

>hAT-N53\_DR

CGTGTGAGTGTGTGTGTGTGAGTGTGTGT

>AL020996.1

CGTGTGTGTGTGTGTGTGTGTGTGTGTGTGTGTGT

>hsamiR574\_5p

TGAGTGTGTGTGTGTGAGTGTGT

>hAT-N53\_DR

CGTGTGAGTGTGTGTGTGTGAGTGTGTGT

>CREB3L2

CGTGTGTGTGTGTGTGTGTGTGTGTGTGTGTGTGT

>hsamiR574\_5p

TGAGTGTGTGTGTGTGAGTGTGT

>hAT-N53\_DR

CGTGTGAGTGTGTGTGTGTGAGTGTGTGT

>THRA  
CGTGTGTGTGTGTGTGTGTGTGTGTGTGTGTGT

>hsamiR574\_5p  
TGAGTGTGTGTGTGTGAGTGTGT  
>hAT-N53\_DR  
CGTGTGAGTGTGTGTGTGTGAGTGTGTGT  
>DCAKD  
CGTGTGTGTGTGTGTGTGTGTGTGTGTGTGTGT

>hsamiR574\_5p  
TGAGTGTGTGTGTGTGAGTGTGT  
>hAT-N53\_DR  
CGTGTGAGTGTGTGTGTGTGAGTGTGTGT  
>LDB3  
CGTGTGTGTGTGTGTGTGTGTGTGTGTGTGTGT

>hsamiR574\_5p  
TGAGTGTGTGTGTGTGAGTGTGT  
>hAT-N53\_DR  
CGTGTGAGTGTGTGTGTGTGAGTGTGTGT  
>NRXN1  
CGTGTGTGTGTGTGTGTGTGTGTGTGTGTGTGT

>hsamiR574\_5p  
TGAGTGTGTGTGTGTGAGTGTGT  
>hAT-N53\_DR  
CGTGTGAGTGTGTGTGTGTGAGTGTGTGT  
>XRCC1  
CGTGTGTGTGTGTGTGTGTGTGTGTGTGTGTGT

>hsamiR574\_5p  
TGAGTGTGTGTGTGTGAGTGTGT  
>hAT-N53\_DR  
CGTGTGAGTGTGTGTGTGTGAGTGTGTGT  
>MGRN1  
CGTGTGTGTGTGTGTGTGTGTGTGTGTGTGTGT

>hsamiR574\_5p  
TGAGTGTGTGTGTGTGAGTGTGT  
>hAT-N53\_DR  
CGTGTGAGTGTGTGTGTGTGAGTGTGTGT  
>FOXN3  
CGTGTGTGTGTGTGTGTGTGTGTGTGTGTGTGT

>hsamiR574\_5p  
TGAGTGTGTGTGTGTGAGTGTGT  
>hAT-N53\_DR



TGAGTGTGTGTGTGTGAGTGTGT  
>hAT-N53\_DR  
GTGTGAGTGTGTGTGTGTGAGTGTGTGT  
>AR  
AGTGTGTGTGTATGTGTGTGTGTGTGAGAGAGAGAGAGAGAGTGTGTGTGTGTGGGGGGGGAGAGAGAGAGAGA  
GCGTGTGTGTGTGTGTGTGTGTGTGTGTGTGTGTGT

>hsamiR574\_5p  
TGAGTGTGTGTGTGTGAGTGTGT  
>hAT-N53\_DR  
AGTGTGTGTGTGTGAGTGTGTGT  
>RAB3IP  
AGTGTGTGTGTGTGTGTGTGTGTGTGTGTGTGTGT

>hsamiR574\_5p  
TGAGTGTGTGTGTGTGAGTGTGT  
>hAT-N53\_DR  
AGTGTGTGTGTGTGAGTGTGTGT  
>KATNAL1  
AGTGTGTGTGTGTGTGTGTGTGTGTGTGTGTGTGT

>hsamiR574\_5p  
TGAGTGTGTGTGTGTGAGTGTGT  
>hAT-N53\_DR  
GAGTGTGTGTGTGTGAGTGTGTGT  
>RALGAPB  
GAGTGTGTGTGTGTGTGTGTGTGTGTGTGTGTGTGT

>hsamiR574\_5p  
TGAGTGTGTGTGTGTGAGTGTGT  
>hAT-N53\_DR  
GTGAGTGTGTGTGTGTGAGTGTGTGT  
>PAX5  
GTGAGTGTGTGTGTGTGTGTGTGTGTGTGTGTGTGTGT

>hsamiR574\_5p  
TGAGTGTGTGTGTGTGAGTGTGT  
>hAT-N53\_DR  
GTGAGTGTGTGTGTGTGAGTGTGTGT  
>IGF1  
GTGAATGTGTGTGTGTGTGTGTGTGTGTGTGTGTGTGT

>hsamiR574\_5p  
TGAGTGTGTGTGTGTGAGTGTGT  
>hAT-N53\_DR  
CGTGTGAGTGTGTGTGTGTGAGTGTGTGT  
>MAP3K2  
CGTGTGTGTGTGTGTGTGTGTGTGTGTGTGTGTGT

>hsamiR574\_5p  
TGAGTGTGTGTGTGTGAGTGTGT  
>hAT-N53\_DR  
CGTGTGAGTGTGTGTGTGTGAGTGTGTGT  
>LDB3  
CGTGTGTGTGTGTGTGTGTGTGTGTGTGT

>hsamiR574\_5p  
TGAGTGTGTGTGTGTGAGTGTGT  
>hAT-N53\_DR  
CGTGTGAGTGTGTGTGTGTGAGTGTGTGT  
>AL020996.1  
CGTGTGTGTGTGTGTGTGTGTGTGTGTGT

>hsamiR574\_5p  
TGAGTGTGTGTGTGTGAGTGTGT  
>hAT-N53\_DR  
CGTGTGAGTGTGTGTGTGTGAGTGTGTGT  
>DCAKD  
CGTGTGTGTGTGTGTGTGTGTGTGTGTGT

>hsamiR574\_5p  
TGAGTGTGTGTGTGTGAGTGTGT  
>hAT-N53\_DR  
CGTGTGAGTGTGTGTGTGTGAGTGTGTGT  
>THRA  
CGTGTGTGTGTGTGTGTGTGTGTGTGTGT

>hsamiR574\_5p  
TGAGTGTGTGTGTGTGAGTGTGT  
>hAT-N53\_DR  
CGTGTGAGTGTGTGTGTGTGAGTGTGTGT  
>NRXN1  
CGTGTGTGTGTGTGTGTGTGTGTGTGTGT

>hsamiR574\_5p  
TGAGTGTGTGTGTGTGAGTGTGT  
>hAT-N53\_DR  
CGTGTGAGTGTGTGTGTGTGAGTGTGTGT  
>CREB3L2  
CGTGTGTGTGTGTGTGTGTGTGTGTGTGT

>hsamiR574\_5p  
TGAGTGTGTGTGTGTGAGTGTGT  
>hAT-N53\_DR  
CGTGTGAGTGTGTGTGTGTGAGTGTGTGT  
>XRCC1  
CGTGTGTGTGTGTGTGTGTGTGTGTGTGT

>hsamiR574\_5p  
TGAGTGTGTGTGTGTGAGTGTGT  
>hAT-N53\_DR  
CGTGTGAGTGTGTGTGTGTGAGTGTGTGT  
>FOXN3  
CGTGTGTGTGTGTGTGTGTGTGTGTGTGT

>hsamiR574\_5p  
TGAGTGTGTGTGTGTGAGTGTGT  
>hAT-N53\_DR  
CGTGTGAGTGTGTGTGTGTGAGTGTGTGT  
>MGRN1  
CGTGTGTGTGTGTGTGTGTGTGTGTGTGT

>hsamiR574\_5p  
TGAGTGTGTGTGTGTGAGTGTGT  
>hAT-N53\_DR  
GCGTGTGAGTGTGTGTGTGTGAGTGTGTGT  
>AR  
GCGTGTGTGTGTGTGTGTGTGTGTGTGTGT

>hsamiR574\_5p  
TGAGTGTGTGTGTGTGAGTGTGT  
>hAT-N53\_DR  
GCGTGTGAGTGTGTGTGTGTGAGTGTGTGT  
>NDUFB5  
GCGTGTGTGTGTGTGTGTGTGTGTGTGTGT

>hsamiR574\_5p  
TGAGTGTGTGTGTGTGAGTGTGT  
>hAT-N53\_DR  
GCGTGTGAGTGTGTGTGTGTGAGTGTGTGT  
>CHRDL1  
GCGTGTGTGTGTGTGTGTGTGTGTGTGTGT

>hsamiR574\_5p  
TGAGTGTGTGTGTGTGAGTGTGT  
>hAT-N53\_DR  
GGCGTGTGAGTGTGTGTGTGTGAGTGTGTGT  
>C15orf57  
GGCGTGTGTGTGTGTGTGTGTGTGTGTGTGT

>hsamiR574\_5p  
TGAGTGTGTGTGTGTGAGTGTGT  
>hAT-N53\_DR  
GGCGTGTGAGTGTGTGTGTGTGAGTGTGTGT  
>NMNAT2  
GGCGTGTGTGTGTGTGTGTGTGTGTGTGTGT



>hsamiR574\_5p  
TGAGTGTGTGTGTGTGAGTGTGT  
>hAT-N53\_DR  
GCGTGTGAGTGTGTGTGTGTGAGTGTGTGT  
>AR  
GAGTGTGTGTGTGTTGGGGGGGAGAGAGAGAGAGAGCGTGTGTGTGTGTGTGTGTGTGTGTGTGTGTGT

>hsamiR574\_5p  
TGAGTGTGTGTGTGTGAGTGTGT  
>hAT-N53\_DR  
GCGTGTGAGTGTGTGTGTGTGAGTGTGTGT  
>AR  
GTGTGTGTGTGTGAGAGAGAGAGAGAGAGTGTGTGTGTGTTGGGGGGGAGAGAGAGAGAGAGCGTGTGTGTGT  
GTGTGTGTGTGTGTGTGT

>hsamiR574\_5p  
TGAGTGTGTGTGTGTGAGTGTGT  
>hAT-N53\_DR  
GCGTGTGAGTGTGTGTGTGTGAGTGTGTGT  
>AR  
AGTGTGTGTGTATGTGTGTGTGTGTGAGAGAGAGAGAGAGAGTGTGTGTGTGTTGGGGGGGAGAGAGAGAGAGA  
GCGTGTGTGTGTGTGTGTGTGTGTGTGTGTGTGT

>hsamiR574\_5p  
TGAGTGTGTGTGTGTGAGTGTGT  
>hAT-N53\_DR  
AGTGTGTGTGTGTGAGTGTGTGT  
>RAB3IP  
AGTGTGTGTGTGTGTGTGTGTGTGTGTGTGTGT

>hsamiR574\_5p  
TGAGTGTGTGTGTGTGAGTGTGT  
>hAT-N53\_DR  
AGTGTGTGTGTGTGAGTGTGTGT  
>KATNAL1  
AGTGTGTGTGTGTGTGTGTGTGTGTGTGTGTGT

>hsamiR574\_5p  
TGAGTGTGTGTGTGTGAGTGTGT  
>hAT-N53\_DR  
GAGTGTGTGTGTGTGAGTGTGTGT  
>RALGAPB  
GAGTGTGTGTGTGTGTGTGTGTGTGTGTGTGT

>hsamiR574\_5p  
TGAGTGTGTGTGTGTGAGTGTGT  
>hAT-N53\_DR  
GAGTGTGTGTGTGTGAGTGTGTGT

>NMNAT2  
GAGTGTGTGTGTGTGTGTGTGTGTGTGTGTGT

>hsamiR574\_5p  
TGAGTGTGTGTGTGTGAGTGTGT  
>hAT-N53\_DR  
GTGAGTGTGTGTGTGTGAGTGTGTGT  
>PAX5  
GTGAGTGTGTGTGTGTGTGTGTGTGTGTGTGT

>hsamiR574\_5p  
TGAGTGTGTGTGTGTGAGTGTGT  
>hAT-N53\_DR  
GTGAGTGTGTGTGTGTGAGTGTGTGT  
>IGF1  
GTGAATGTGTGTGTGTGTGTGTGTGTGTGTGTGT

>hsamiR574\_5p  
TGAGTGTGTGTGTGTGAGTGTGT  
>hAT-N53\_DR  
AGTGTGTGTGTGTGAGTGTGTGT  
>RAB3IP  
AGTGTGTGTGTGTGTGTGTGTGTGTGTGTGT

>hsamiR574\_5p  
TGAGTGTGTGTGTGTGAGTGTGT  
>hAT-N53\_DR  
AGTGTGTGTGTGTGAGTGTGTGT  
>KATNAL1  
AGTGTGTGTGTGTGTGTGTGTGTGTGTGTGT

>hsamiR574\_5p  
TGAGTGTGTGTGTGTGAGTGTGT  
>hAT-N53\_DR  
GAGTGTGTGTGTGTGAGTGTGTGT  
>RALGAPB  
GAGTGTGTGTGTGTGTGTGTGTGTGTGTGT

>hsamiR574\_5p  
TGAGTGTGTGTGTGTGAGTGTGT  
>hAT-N53\_DR  
GAGTGTGTGTGTGTGAGTGTGTGT  
>NMNAT2  
GAGTGTGTGTGTGTGTGTGTGTGTGTGTGT

>hsamiR574\_5p  
TGAGTGTGTGTGTGTGAGTGTGT  
>hAT-N53\_DR

GTGAGTGTGTGTGTGTGAGTGTGTGT  
>PAX5  
GTGAGTGTGTGTGTGTGTGTGTGTGTGT

>hsamiR574\_5p  
TGAGTGTGTGTGTGTGAGTGTGT  
>hAT-N53\_DR  
GTGAGTGTGTGTGTGTGAGTGTGTGT  
>IGF1  
GTGAATGTGTGTGTGTGTGTGTGTGTGT

>hsamiR574\_5p  
TGAGTGTGTGTGTGTGAGTGTGT  
>hAT-N53\_DR  
AGTGTGTGTGTGTGAGTGTGTGT  
>RAB3IP  
AGTGTGTGTGTGTGTGTGTGTGTGT

>hsamiR574\_5p  
TGAGTGTGTGTGTGTGAGTGTGT  
>hAT-N53\_DR  
AGTGTGTGTGTGTGAGTGTGTGT  
>KATNAL1  
AGTGTGTGTGTGTGTGTGTGTGTGT

>hsamiR574\_5p  
TGAGTGTGTGTGTGTGAGTGTGT  
>hAT-N53\_DR  
GAGTGTGTGTGTGTGAGTGTGTGT  
>NMNAT2  
GAGTGTGTGTGTGTGTGTGTGTGTGT

>hsamiR574\_5p  
TGAGTGTGTGTGTGTGAGTGTGT  
>hAT-N53\_DR  
GAGTGTGTGTGTGTGAGTGTGTGT  
>RALGAPB  
GAGTGTGTGTGTGTGTGTGTGTGTGT

>hsamiR574\_5p  
TGAGTGTGTGTGTGTGAGTGTGT  
>hAT-N53\_DR  
GTGAGTGTGTGTGTGTGAGTGTGTGT  
>PAX5  
GTGAGTGTGTGTGTGTGTGTGTGTGTGT

>hsamiR574\_5p  
TGAGTGTGTGTGTGTGAGTGTGT

>hAT-N53\_DR  
GTGAGTGTGTGTGTGTGAGTGTGTGT  
>IGF1  
GTGAATGTGTGTGTGTGTGTGTGTGTGT

>hsamiR574\_5p  
TGAGTGTGTGTGTGTGAGTGTGT  
>hAT-N53\_DR  
AGTGTGTGTGTGTGAGTGTGTGT  
>KATNAL1  
AGTGTGTGTGTGTGTGTGTGTGT

>hsamiR574\_5p  
TGAGTGTGTGTGTGTGAGTGTGT  
>hAT-N53\_DR  
GAGTGTGTGTGTGTGAGTGTGTGT  
>RALGAPB  
GAGTGTGTGTGTGTGTGTGTGTGT

>hsamiR574\_5p  
TGAGTGTGTGTGTGTGAGTGTGT  
>hAT-N53\_DR  
GAGTGTGTGTGTGTGAGTGTGTGT  
>NMNAT2  
GAGTGTGTGTGTGTGTGTGTGTGT

>hsamiR574\_5p  
TGAGTGTGTGTGTGTGAGTGTGT  
>hAT-N53\_DR  
TGAGTGTGTGTGTGTGAGTGTGTGT  
>GABRB2  
TGAGTGTGTGTGTGTGTGTGTGTGT

>hsamiR574\_5p  
TGAGTGTGTGTGTGTGAGTGTGT  
>hAT-N53\_DR  
GTGAGTGTGTGTGTGTGAGTGTGTGT  
>PAX5  
GTGAGTGTGTGTGTGTGTGTGTGTGT

>hsamiR574\_5p  
TGAGTGTGTGTGTGTGAGTGTGT  
>hAT-N53\_DR  
CGTGTGAGTGTGTGTGTGTGAGTGTGTGT  
>LRTM2  
CGTGTGAGTGTGTGTGTGTGTGTGTGTGT

>hsamiR574\_5p

TGAGTGTGTGTGTGTGAGTGTGT  
>hAT-N53\_DR  
GTGAGTGTGTGTGTGTGAGTGTGTGT  
>IGF1  
GTGAATGTGTGTGTGTGTGTGTGTGT

>hsamiR3149  
TTTGTATGGATATGTGTGTGTAT  
>Chapaev\_8\_HM\_Chapaev\_Hydra\_magnipapillata  
GATATGTGTGTGTATGTGTGTGT  
>SIGMAR1  
GATATGTGTGTGTGTGTGTGTGT

>hsamiR574\_5p  
TGAGTGTGTGTGTGTGAGTGTGT  
>hAT-N53\_DR  
TGTGTGTGTGTGAGTGTGTGT  
>TRDN  
TGTGTGTGTGTGAGTGTGTGTGT

>hsamiR3149  
TTTGTATGGATATGTGTGTGTAT  
>Chapaev\_8\_HM\_Chapaev\_Hydra\_magnipapillata  
TATGGATATGTGTGTGTATGTGTGTGT  
>EDA2R  
TATGTATATGTGTGTGTATGTGTGTGT

>hsamiR3149  
TTTGTATGGATATGTGTGTGTAT  
>Chapaev\_8\_HM\_Chapaev\_Hydra\_magnipapillata  
TGTATGGATATGTGTGTGT  
>AR  
TGTATGGATATGTGTGTGT

>hsamiR574\_5p  
TGAGTGTGTGTGTGTGAGTGTGT  
>hAT-N53\_DR  
GTGTGTGTGTGTGAGTGTGTGT  
>NMNAT2  
GTGTGTGTGTGTGCGTGTGTGT

>hsamiR574\_5p  
TGAGTGTGTGTGTGTGAGTGTGT  
>hAT-N53\_DR  
GTGTGAGTGTGTGTGTGTGAGTGTGTGT  
>CD22  
GTGTGTGTGTGTGTGTGTGCGTGTGTGT

>hsamiR574\_5p  
TGAGTGTGTGTGTGTGAGTGTGT  
>hAT-N53\_DR  
TGTGTGTGTGTGAGTGTGTGT  
>TRDN  
TGTGTGTGTGTGAGTGTGTGT

>hsamiR574\_5p  
TGAGTGTGTGTGTGTGAGTGTGT  
>hAT-N53\_DR  
GTGTGTGTGTGTGAGTGTGTGT  
>AFF2  
GTGTGTGTGTGTGAGTGTGTGT

>hsamiR574\_5p  
TGAGTGTGTGTGTGTGAGTGTGT  
>hAT-N53\_DR  
GTGTGAGTGTGTGTGTGTGAGTGTGTGT  
>NAA11  
GTGTGTGTGTGTGAGTGTGAGTGTGTGT

>hsamiR574\_5p  
TGAGTGTGTGTGTGTGAGTGTGT  
>hAT-N53\_DR  
GTGTGAGTGTGTGTGTGTGAGTGTGTGT  
>GABRB2  
GTGTGTGTGTGTGTGTGTGACTGTGTGT

>hsamiR3149  
TTTGTATGGATATGTGTGTGTAT  
>Chapaev\_8\_HM\_Chapaev\_Hydra\_magnipapillata  
TATGTGTGTGTATGTGTGT  
>KATNAL1  
TATGTGTGTGTATGTGTGT

>hsamiR574\_5p  
TGAGTGTGTGTGTGTGAGTGTGT  
>hAT-N53\_DR  
GTGAGTGTGTGTGTGTGAGTGTG  
>CD22  
GTGAGTGTGTGTGTGTGTGTGTGCGTGTGT

>hsamiR574\_5p  
TGAGTGTGTGTGTGTGAGTGTGT  
>hAT-N53\_DR  
GAGTGTGTGTGTGTGAGTGTG  
>NAA11  
GAGTGTGTGTGTGTGAGTGTGAGTGTGT









AGGAGTGTGGCTACAGTAAGGCTAGATGTAAGAGGGAAAGTCGGACTGTAGTCTCTCAGTGTGTTGAAGAGAG  
GGGTTGGCTGGCTTCTTCTCCTGGAGAAGCAGAAATCTGGTCCTTGTTACTGAACTTCTGT

>hsamiR574\_5p

TGAGTGTGTGTGTGTGAGTGTGT

>hAT-N53\_DR

GTGTGAGTGTGTGTGTGTGAGTGTGTGT

>AR

GTGTGTGTGTGTGTGTGTGTGTGTTTAGACAGACTGGAGAAGGTGGGAAAGACAGGCCCCAGGCAAGTCAGGGA  
GAGTCCTTCTGACTCTCACATGTGTGTTCCCTGGCTTCACAGACTCCACTTCTCCACTAGAAAGAACTGGTGTCA  
ATATGGAAGCTATGGAGCAGAGAGAGAACAAGATATTCCAACTCTAAGTGATTCTTCTTTGACATCAATACAATA  
TTTGAGTCTGGCTTGGGAGAAGAATGAGAGGCTTACAACCTGATGAAGAGAAGCATGTGATGTGAGAGAGCAATC  
AAGGAGTGTGGCTACAGTAAGGCTAGATGTAAGAGGGAAAGTCGGACTGTAGTCTCTCAGTGTGTTGAAGAGA  
GGGTTGGCTGGCTTCTTCTCCTGGAGAAGCAGAAATCTGGTCCTTGTTACTGAACTTCTGT

>hsamiR574\_5p

TGAGTGTGTGTGTGTGAGTGTGT

>hAT-N53\_DR

GTGTGAGTGTGTGTGTGTGAGTGTGTGT

>AR

GTGTGTGTGTGTGTGTGTGTGTGTTTAGACAGACTGGAGAAGGTGGGAAAGACAGGCCCCAGGCAAGTCAGG  
GAGAGTCCTTCTGACTCTCACATGTGTGTTCCCTGGCTTCACAGACTCCACTTCTCCACTAGAAAGAACTGGTGT  
CAATATGGAAGCTATGGAGCAGAGAGAGAACAAGATATTCCAACTCTAAGTGATTCTTCTTTGACATCAATACAA  
TATTTGAGTCTGGCTTGGGAGAAGAATGAGAGGCTTACAACCTGATGAAGAGAAGCATGTGATGTGAGAGAGCAA  
TCAAGGAGTGTGGCTACAGTAAGGCTAGATGTAAGAGGGAAAGTCGGACTGTAGTCTCTCAGTGTGTTGAAGA  
GAGGGGTTGGCTGGCTTCTTCTCCTGGAGAAGCAGAAATCTGGTCCTTGTTACTGAACTTCTGT

>hsamiR1303

TTTAGAGACGGGGTCTTGCTCT

>PB1D11

TTTTAGAGACGGGGTCTTGCTCTGT

>PDCD7

TTTTTGAGACGGAGTCTTGCTCTGT

>hsamiR493\_3p

TGAAGGTCTACTGTGTGCCAGG

>L2B

CTACTGTGTGCCAGGCCCTGT

>LIMCH1

CTACTGTGTGCCAGGCACTGT

>hsamiR1277\_5p

AAATATATATATATATGTACGTAT

>EnSpm-8\_HM

ATATATATATATATGTACGTATGT

>BVES

ATATATATATATATGTATGTATGT

>hsamiR1277\_5p  
AAATATATATATATATGTACGTAT  
>EnSpm-8\_HM  
TATATATATATATGTACGTATGT  
>SPPL3.1  
TATATATATATATGTACGTATGT

>hsamiR1277\_5p  
AAATATATATATATATGTACGTAT  
>EnSpm-8\_HM  
CCAAATATATATATATAT  
>MYADM  
CCAAATATATATATATATATGT

>hsamiR1277\_5p  
AAATATATATATATATGTACGTAT  
>EnSpm-8\_HM  
AATATATATATATATGT  
>MARCH3  
AATATATATATATATGT

>hsamiR1277\_5p  
AAATATATATATATATGTACGTAT  
>EnSpm-8\_HM  
AAATATATATATATATGT  
>CACNA1I  
AAATATATATATATATGT

>hsamiR1321  
CAGGGAGGTGAATGTGAT  
>MIRc  
CAGGGAGGTGAATGT  
>CBX5  
CAGGGAGGTGAATGT

>hsamiR1268a  
CGGGCGTGGTGGTGGGG  
>AluYc2\_Repetitive\_sequence\_Homo\_sapiens  
CAGGCACGGTGGCTCACGCCTGTAATCCAGCACTTTGGGAGGCTGAGGTGGGTGGATCACCTGAGGTCAGGAG  
TTCGAAACCAGCCTGGCCAACATGGAGAAACACCGACTCTACTAAA  
>ADAMTS4  
CAGGCACGGTGGCTCACGCCTGTAATCCCAGCACTTTGGGAGATGAAGGCGAGTGGATCACCTAAGGTCAGGAG  
TTCGAGACCAGCCTGGCCAACATGGTGAACCCCGTCTCTACTAAAAATACAAAAATTAGCCGGGCGTGGTGGT

>hsamiR3689b\_3p  
CTGGGAGGTGTGATATTGTGGT  
>Copia\_131\_SB\_I\_Copia\_Sorghum\_bicolor  
AGGTGTGATATCGTGGT

>GXYLT1  
AGGTGTGATATCGTGGT

>hsamiR1273d  
GAACCCATGAGGTTGAGGCTGCAGT

>AluSq  
GCTGTGGCTCACACCTGTAATCCTAGCACTTTGGGAGACTGAGGTGGGCGGATCATATGAGGTCAGGAGTTTGAG  
ACCAGCCTGGCCTACATGGTCAAACCTGTCTCTACTAATAATACAAAAATTACCCGGGC  
>USP33  
GGCTGAGGCAGGAGAATCGCTTGAACCCAGGAGGTGGAGGCTGCAGTGAGCTGAGGTAACACCACAGCACTCCA  
GCCTGGGTGACAAAGCAAGACTCTGTCTCAAAAAAATTACTGAAAGACTTTATGGT

>hsamiR1273d  
GAACCCATGAGGTTGAGGCTGCAGT

>AluSq  
GCTGAGGTAGGAGAATCGCTTGAACCCATGAGGTTGAGGCTGCAGTGAGCCAAGATCGTGCCACTGCACTTCAGC  
CTGGGT  
>GPR157  
GCTGAGGTGGGAGGATCGCTTGAGCCTGGGAGGTGGAGGCTGCAGTGAGCCATGATTGCATCACTGCACTCCAG  
ACTGGGT

>hsamir151a\_5p  
TCGAGGAGCTCACAGTCTAGT  
>L2\_Platt1o/MdoRep1\_SINE\_Metatheria  
GAGGAGCTCACAGTCTAGT  
>MDGA1  
GAGGAGCTCACAGTCTAGT

>hsamir151a\_5p  
TCGAGGAGCTCACAGTCTAGT  
>L2\_Platt1o/MdoRep1\_SINE\_Metatheria  
TCCTGCCCTCGAGGAGCTCACAGTCTAGT  
>LPPR5.1  
TCCTGCCCTCGAGGAGCTCACAGTCTAGT

>hsamir151a\_5p  
TCGAGGAGCTCACAGTCTAGT  
>L2\_Platt1o/MdoRep1\_SINE\_Metatheria  
GCCCTCGAGGAGCTCACAGTCTAGT  
>ATPAF1  
GCCCTCAAGGAGCTCACAGTCTAGT

>hsamiR376a\_5p  
GTAGATTCTCCTTCTATGAGTA  
>CER15\_I\_CE\_LTR\_Retrotransposon\_Caenorhabditis\_elegans  
TCTCCTTCTATGAGT  
>GTPBP10  
TCTCCTTCTATGAGT

>hsamiR1268a  
CGGGCGTGGTGGTGGGG  
>AluYc2\_Repetitive\_sequence\_Homo\_sapiens  
TAGCCGGGCGTGGTGGTGGGGCCTGTGGTCCCAGCTACTTTGGAGGCTGAGGTGGAAGGATCACCTGAGCCCA  
GGAGGTGGAGGCTGCAGT  
>MAGT1  
TAGCCAGGCGTGGTGGTGGGCACCTGTAATTCCAGCTATTCAGGAGGCTGAGGCAGAAGAATCACTTGAATCCAG  
GAGGCAGAGGTTGCAGT

>hsamiR548a\_3p  
CAAAACTGGCAATTACTTTTGC  
>MADE1  
TGTTATTAGGTTCGGTGCAAAAGTAATTGCGAGTTTTACCATTACTTTCAATGGCAAACTGGCAATTACTTTTGCAC  
CAACGTAATACTTCT  
>ALG10  
TGTTATTAGGTTGGTAAAAAGTAATTGTGGTTTTGCCATTACTTTCAATGGCAAAAACCACAATTACTTTTGCCT  
AACCTAATATTTCT

>hsamiR548a\_3p  
CAAAACTGGCAATTACTTTTGC  
>MADE1  
TGTTATTAGGTTCGGTGCAAAAGTAATTGCGAGTTTTACCATTACTTTCAATGGCAAACTGGCAATTACTTTTGCAC  
CAACGTAATACTTCT  
>ALG10B  
TGTTATTAGGTTGGTACAAAAGTAATTGTGGTTTTGCCATTACTTTCAATGGCAAAAACCACAATTACTTTTGCCT  
AACCTAATAGTTCT

>hsamiR574\_5p  
TGAGTGTGTGTGTGTGAGTGTGT  
>hAT-N53\_DR  
GTGTGAGTGTGTGTGTGTGAGTGTGTGT  
>AR  
AGTGTGTGTGTATGTGTGTGTGTGTGTGAGAGAGAGAGAGAGTGTGTGTGTGTGTTGGGGGGGGAGAGAGAGAGAGA  
GCGTGTGTGTGTGTGTGTGTGTGTGTGTGTGTGTGTGTTAGACAGACTGGAGAAGGTGGGAAAGACAGGCCCCAG  
GCAAGTCAGGGAGAGTCTTCTGACTCTCACATGTGTGTTCCCTGGCTTCACAGACTCCACTTCTCCACTAGAAAG  
AAACTGGTGTCAATATGGAAGCTATGGAGCAGAGAGAGAACAAGATATCCAACTCTAAGTGATTCTTCTTTGAC  
ATCAATACAATATTTGAGTCTGGCTTGGGAGAAGAATGAGAGGCTTACAAGTGAAGAGAAGCATGTGATGTG  
AGAGAGCAATCAAGGAGTGTGGCTACAGTAAGGCTAGATGTAAGAGGGAAAGTCGGACTGTAGTCTCTCAGTGT  
GTTTGAAGAGAGGGGTTGGCTGGCTTCTTCTCCTGGAGAAGCAGAAATCTGGTCCTTGTACTGAACTTCT

>hsamiR574\_5p  
TGAGTGTGTGTGTGTGAGTGTGT  
>hAT-N53\_DR  
GTGTGAGTGTGTGTGTGTGAGTGTGTGT  
>AR  
GTGTGTGTGTGTGAGAGAGAGAGAGAGTGTGTGTGTGTGTTGGGGGGGGAGAGAGAGAGAGAGAGAGCGTGTGTGTGT  
GTGTGTGTGTGTGTGTGTGTGTGTTAGACAGACTGGAGAAGGTGGGAAAGACAGGCCCCAGGCAAGTCAGGGA

GAGTCCTTCTGACTCTCACATGTGTGTTCCCTGGCTTCACAGACTCCACTTCTCCACTAGAAAGAAACTGGTGTCA  
ATATGGAAGCTATGGAGCAGAGAGAGAACAAGATATTCCAACTCTAAGTGATTCTTCTTTGACATCAATACAATA  
TTTGAGTCTGGCTTGGGAGAAGAATGAGAGGCTTACAAGTGAAGAGAAGCATGTGATGTGAGAGAGCAATC  
AAGGAGTGTGGCTACAGTAAGGCTAGATGTAAGAGGGAAAGTCGGACTGTAGTCTCTCAGTGTGTTTGAAGAGA  
GGGTTGGCTGGCTTCTTCTCCTGGAGAAGCAGAAATCTGGTCCTTGTTTACTGAACTTCT

>hsamiR574\_5p

TGAGTGTGTGTGTGTGAGTGTGT

>hAT-N53\_DR

GTGTGAGTGTGTGTGTGTGAGTGTGTGT

>AR

GTGTGTGTGTGTGTGTGTGTTTAGACAGACTGGAGAAGGTGGGAAAGACAGGCCCCAGGCAAGTCAGGGAGAG  
TCCTTCTGACTCTCACATGTGTGTTCCCTGGCTTCACAGACTCCACTTCTCCACTAGAAAGAAACTGGTGTCAATAT  
GGAAGCTATGGAGCAGAGAGAGAACAAGATATTCCAACTCTAAGTGATTCTTCTTTGACATCAATACAATATTTG  
AGTCTGGCTTGGGAGAAGAATGAGAGGCTTACAAGTGAAGAGAAGCATGTGATGTGAGAGAGCAATCAAGG  
AGTGTGGCTACAGTAAGGCTAGATGTAAGAGGGAAAGTCGGACTGTAGTCTCTCAGTGTGTTTGAAGAGAGGGG  
TTGGCTGGCTTCTTCTCCTGGAGAAGCAGAAATCTGGTCCTTGTTTACTGAACTTCT

>hsamiR574\_5p

TGAGTGTGTGTGTGTGAGTGTGT

>hAT-N53\_DR

GTGTGAGTGTGTGTGTGTGAGTGTGTGT

>AR

GTGTGTGTGTGTGTGTGTGTTTAGACAGACTGGAGAAGGTGGGAAAGACAGGCCCCAGGCAAGTCAGGGAG  
AGTCCTTCTGACTCTCACATGTGTGTTCCCTGGCTTCACAGACTCCACTTCTCCACTAGAAAGAAACTGGTGTCAA  
TATGGAAGCTATGGAGCAGAGAGAGAACAAGATATTCCAACTCTAAGTGATTCTTCTTTGACATCAATACAATAT  
TTGAGTCTGGCTTGGGAGAAGAATGAGAGGCTTACAAGTGAAGAGAAGCATGTGATGTGAGAGAGCAATCA  
AGGAGTGTGGCTACAGTAAGGCTAGATGTAAGAGGGAAAGTCGGACTGTAGTCTCTCAGTGTGTTTGAAGAGAG  
GGGTTGGCTGGCTTCTTCTCCTGGAGAAGCAGAAATCTGGTCCTTGTTTACTGAACTTCT

>hsamiR574\_5p

TGAGTGTGTGTGTGTGAGTGTGT

>hAT-N53\_DR

GTGTGAGTGTGTGTGTGTGAGTGTGTGT

>AR

GTGTGTGTGTGTGTGTGTGTTTAGACAGACTGGAGAAGGTGGGAAAGACAGGCCCCAGGCAAGTCAGGGGA  
GAGTCCTTCTGACTCTCACATGTGTGTTCCCTGGCTTCACAGACTCCACTTCTCCACTAGAAAGAAACTGGTGTCA  
ATATGGAAGCTATGGAGCAGAGAGAGAACAAGATATTCCAACTCTAAGTGATTCTTCTTTGACATCAATACAATA  
TTTGAGTCTGGCTTGGGAGAAGAATGAGAGGCTTACAAGTGAAGAGAAGCATGTGATGTGAGAGAGCAATC  
AAGGAGTGTGGCTACAGTAAGGCTAGATGTAAGAGGGAAAGTCGGACTGTAGTCTCTCAGTGTGTTTGAAGAGA  
GGGTTGGCTGGCTTCTTCTCCTGGAGAAGCAGAAATCTGGTCCTTGTTTACTGAACTTCT

>hsamiR574\_5p

TGAGTGTGTGTGTGTGAGTGTGT

>hAT-N53\_DR







CCTGCCCTCATGGAGCTCACAGTCT

>hsamiR28\_5p

AAGGAGCTCACAGTCTATTGAG

>L2\_Platt1o

GGTCCTTGGCCTCAAGGAGCTCACAGTCT

>RUNDC3A

GGTCCTTGGCCTCATGGAGCTCACAGTCT

>hsamir151a\_5p

TCGAGGAGCTCACAGTCTAGT

>L2\_Platt1o/MdoRep1\_SINE\_Metatheria

CCTGCCCTCGAGGAGCTCACAGTCT

>URGCP

CCTGCCCTCAAGGAGCTCACAGTCT

>hsamiR28\_5p

AAGGAGCTCACAGTCTATTGAG

>L2\_Platt1o

GTCCTTGGCCTCAAGGAGCTCACAGTCT

>URGCP

GTCCTTGGCCTCAAGGAGCTCACAGTCT

>hsamiR1273a

GGGCGACAAAGCAAGACTCTTTCTT

>AluS

GCTCTTGGCTGGGCTTGGTGGCTCACACCTGTAATCCCAGCACTTTGGAAGGCCAAGGTGGGTGGATCACGAGGT  
CAGGAGTTCGAGACCAGCCTGGCCAACATAGTGAAACCCATCTCTACTAAAAATACAAAAATTAGCCGGGCGTGG  
TGGCGCTCGCCTATAATCCCAGCTACTCAGCGGGCTGAGGCAGGAGAATTGCTTGAACCCGGGTGGTGGAGGTTG  
CAGTGAGCCAAGATTGCGCCACTGCACTCCAGCCTGGGCGACAAAGCAAGACTCT

>TMEM136

GCTCATGGCTGGGCACGGTGGCTCACACCTGTAATCCCAGCACTTTGGGAGGCCGAGGCGGGTGGGTGATGAAG  
TCAGGAGTTCAAGACCAGCCTGGCCAACATGGTGAACCCCGTCTCTACTAAAAATACAAAAAGTAGCCAGGCAT  
GGTGGCACACGCCTGTAGTCCCAGCTACTCGGGAGGCTGAGGCAGGAGAATCACTTGAACACAGAAGGCGGAGG  
TTGCAGTGAGTTGAGATCACACCACTGCACTCCAGCCTGGGCGACAGAGCAAGACTCT

>hsamiR1273a

GGGCGACAAAGCAAGACTCTTTCTT

>AluS

TGGCTCACACCTGTAATCCCAGCACTTTGGAAGGCCAAGGTGGGTGGATCACGAGGTCAGGAGTTCGAGACCAGC  
CTGGCCAACATAGTGAAACCCATCTCTACTAAAAATACAAAAATTAGCCGGGCGTGGTGGCGCTCGCCTATAATCC  
CAGCTACTCAGCGGGCTGAGGCAGGAGAATTGCTTGAACCCGGGTGGTGGAGGTTGCAGTGAGCCAAGATTGCG  
CCACTGCACTCCAGCCTGGGCGACAAAGCAAGACTCT

>GNG4

TGGCTCACACCTGCAATCCCAGCACTTTGGGAGGCCAAGGTGGGCAGATCACTCGAGGCCAGTAGTTGGAGACCA  
GCCTGGCCGACATGGTGAACCCCGTCTCTACTAAAAATACAAAAATGAGCCAGGCATGTTGGCGTGTGCTTGTCT

ATCCCAGCTACTAGGGAGGCTGAGACATGAGGATCACTTGAACCTGCGAGTGGAGGTTGCGGTGAGCTGAGATT  
GTGCCATTGCATTCCAGCCCCGGCGACAGAGCAAGACTCT

>hsamiR1273a

GGGCGACAAAGCAAGACTCTTTCTT

>AluS

GTGGCTCACACCTGTAATCCCAGCACTTTGGAAGGCCAAGGTGGGTGGATCACGAGGTCAGGAGTTCGAGACCA  
GCCTGGCCAACATAGTGAAACCCATCTCTACTAAAAATACAAAAATTAGCCGGGCGTGGTGGCGCTCGCCTATAAT  
CCCAGCTACTCAGCGGGCTGAGGCAGGAGAATTGCTTGAACCCGGGTGGTGGAGGTTGCAGTGAGCCAAGATTG  
CGCCACTGCACTCCAGCCTGGGCGACAAAGCAAGACTCT

>USP33

GTGGCTCACACCTGTAATCCCAGCACTTTGGGAGGCCGAGGTGGGTGGATCACCTGAGGTCAGGAGTTTGAGACT  
AGCCTGGCCAACATGGTGAAACCCCATCTCTACTAAAATACAAAAATTAGCCGGGCATGGTGGCAGGTGCCTGTA  
ATCCCAGCTACTCGAGAGGCTGAGGCAGGAGAATCGCTTGAACCCAGGAGGTGGAGGCTGCAGTGAGCTGAGGT  
AACACCACAGCACTCCAGCCTGGGTGACAAAGCAAGACTCT

>hsamiR1271\_3p

AGTGCCTGCTATGTGCCAGGCA

>L2B

CTATGTGCCAGGCATTGTGCT

>EIF3M

CTATGTGCCAGGCACTGTGCT

>hsamiR1271\_3p

AGTGCCTGCTATGTGCCAGGCA

>L2B

CTATGTGCCAGGCATTGTGCT

>MBD2

CTATGTGCCAGGCACTGTGCT

>hsamiR3118

TGTGACTGCATTATGAAAATTCT

>L1PA13\_5

AATCTCATATTTCTGGATGTTTTGTTCACTTCTTTCTTTTCCCCATTCTTGTCTGCCTGTTTTATTTTCAGAA  
AGCCAGTTTTCAAGCTCTGGGATTCTTTCTCTGCTTGGTCTATTCTGCTGGGTGGTCTTGCACATGAGATGGAGCT  
GGTGTGACCTCAGCCCTCCTTAGTCTGCTTGCCTCTCCAGGACCCAGCCTGGCCACACCTGCTTACAGGGCAATC  
TCGGGTGCCACAAACACTACAATAATTTTCATAATGCAATCACACATAATCACTATGTGACTGCATTATGAAAATT  
CTTGTAGTGTGCTTTTCAGCTCTATTAGGTCGGTTATGTCTTCTTTATACTTGCTATTTTGTCTGTTAGCTCCTACAAT  
GTTTTACAATGATTTTTAGCTCTGTTGATTGCATGACAACATACTTCTTTCACTCAGTGAACCTTTGTTCTACGCATA  
TCCTGAACCCTGCTTGTATCATTCCAGACATCTCAGCCTCAGCCAGTTCTGAACACTTGCTGGAGAGTTGATACAG  
TCATTTGGAGGAAAGAAGGCATGCT

>POTEC

AATCCCATATTTCTCGGATGTTTTGTTCACTTCCCTTTCACTTCTTTTCCCCATTCTTGTTCCTGTTTTATTTTCAGA  
AAGCCAGTTTTCAAGCTCTGGGATTCTTTCTCTTCTTGGTCTATTCTGTTAGATGGTCTTGCACATGAGATGGAGC  
TGGTCTGACCTCAGCCCTCCTAGTCTGCTTGCCTCTCCAGGACCCAGCCTGGCCACACCTGCTTACAGGGCACT  
CTCAGGTGCCACACATACTACAATAATATTTCATAATGCAATCACACACAATCACCATGTGACTACATTATGAAAAT  
TCTTCTAGTGTGATTTACAGCTCTGTCAGGTCAGTTATTTCTTCTTTATACTCACTATTTTGTCTGTTAGTTCTGCA

ATGTTTTACAATGATTTTTAGCTTCCTTGATTGGATTACAACATACTTCTTTCCTCAATGAACTTTGTTCTACCCA  
TATCCTGAACTCTGCTTGTATCATTTTCAGACATCTCAGCCTCAGCCCAGTTCTGAACACTTGCTGGAGAGTTGATGC  
AGTCATTTGGAGAAAAGAAGGTATGCT

>hsamiR1268a

CGGGCGTGGTGGTGGGG

>AluYc2\_Repetitive\_sequence\_Homo\_sapiens

TAGCCGGGCGTGGTGGTGGGGCCTGTGGTCCCAGCTACTTTGGAGGCT

>RBM7

TAGCCAGGCGTGGTGGTGGGTGCCTGTAATCCCAGCTACTCGGGAGGCT

>hsamiR582\_5p

TTACAGTTGTTCAACCAGTTACT

>L3

TTTGATTACAGTTGTTCAACCAGTTACT

>KHDRBS3

TTTGCTTCAGGTGTTCAACCAGTTCCT

>hsamiR28\_3p

CACTAGATTGTGAGCTCCTGGA

>L2\_Plat1o

CTAGATTGTGAGCTCCT

>RNF165

CTAGATTGTGAGCTCCT

>hsamiR493\_3p

TGAAGGTCTACTGTGTGCCAGG

>L2B

GTCTACTGTGTGCCAGGCCCT

>CELF5

GTCTACTCTGTGCCAGGCCCT

>hsamiR548aa

AAAAACCACAATTACTTTTGCACCA

>MADE1

AAAAACCACAATTACTTTTGCACCAACCT

>NWD1

AAAAACCACAGTTACTTTTGCACCAACCT

>hsamiR548aa

AAAAACCACAATTACTTTTGCACCA

>MADE1

AATGGCAAAAACCACAATTACTTTTGCACCAACCT

>NWD1

AATGGCGAAAACCACAGTTACTTTTGCACCAACCT

>hsamiR548d\_3p

CAAAAACCACAGTTTCTTTTGC

>MADE1  
TAATGGCAAAAACCACAGTTTCTTTTGCACCAACCT  
>NWD1  
TAATGGCGAAAACCACAGTTACTTTTTGCACCAACCT

>hsamiR548t\_3p  
AAAAACCACAATTACTTTTGCACCA  
>MADE1  
TTTTTAATGACAAAAACCACAATTACTTTTGCACCAACCT  
>NWD1  
TTTTTAATGGCGAAAACCACAGTTACTTTTTGCACCAACCT

>hsamiR548a\_3p  
CAAACTGGCAATTACTTTTGC  
>MADE1  
GCAATTACTTTTGCACCAACGTAATACT  
>AL591684.1  
GCAATTACTTTTGCACCAACCTAATACT

>hsamiR548a\_3p  
CAAACTGGCAATTACTTTTGC  
>MADE1  
GCAATTACTTTTGCACCAACGTAATACT  
>AL603965.1  
GCAATTACTTTTGCACCAACCTAATACT

>hsamiR603  
CACACTGCAATTACTTTTGC  
>MADE1  
GCAATTACTTTTGTCCAACCTAATACT  
>AL591684.1  
GCAATTACTTTTGCACCAACCTAATACT

>hsamiR603  
CACACTGCAATTACTTTTGC  
>MADE1  
GCAATTACTTTTGTCCAACCTAATACT  
>AL603965.1  
GCAATTACTTTTGCACCAACCTAATACT

>hsamiR548h\_3p  
CAAAAACCGCAATTACTTTTGC  
>MADE1  
CAAAAACCGCAATTACTTTTGCACCAACCTAATACT  
>AL591684.1  
CAAAAACCGCAATTACTTTTGCACCAACCTAATACT

>hsamiR548h\_3p

CAAAAACCGCAATTACTTTTGCA

>MADE1

CAAAAACCGCAATTACTTTTGACCAACCTAATACT

>AL603965.1

CAAAAACCGCAATTACTTTTGACCAACCTAATACT

>hsamiR1972

TCAGGCCAGGCACAGTGGCTCA

>AANU01178229.1\_7254x6952\_RF00100\_7SK

AGGCCAGGCACAGTGGCTCATGCCTGTAATCCCAGCAATTTGGGAGGCTGAGGCAGGCCGGATCACCTGAGGTCA

GGAGTTCGAGACCAGCCTGGCCAACATAGTGAAACCTGTCTCTACTAAAAATACAAGAAATTAGCCAGATGTGG

TGGCATGCACCTGTAATCCCAGCAATTCAGGAGGTTGAGGCAGGAGAAACACTTGAACCCGGGAGGCAGAGATT

GCAGTGAGGTGAGATTGTGCTACTGCACTCCAGCCTGGGCAACAGAGTGAGACT

>WNK4

AGGCCAGGCACGGTGGCTCACACCTGTAATCCCAGCACTTTGGGAGGCCGAGGAGGGCGGATCACGAGGTCAGG

AGATCGAGACCAGCCTGGCTAACACGGTGAAACCTGTCTCTACTAAAAATACAAAAAAATTAGCCGGGTGTGG

TGGCGAGCGCCTGTAGTCCCAGCTACTCGGGAGGCTGGGACAGGAGAATGGCGTGAACCCGGGAGGCCGGAGCT

TGCAGTGAGCCGAGATCGTGCCACTGCACTCCAGCCTGGGCGACAGAGTGAGACT

>hsamiR1972

TCAGGCCAGGCACAGTGGCTCA

>AANU01178229.1\_7254x6952\_RF00100\_7SK

AGGCCAGGCACAGTGGCTCATGCCTGTAATCCCAGCAATTTGGGAGGCTGAGGCAGGCCGGATCACCTGAGGTCA

GGAGTTCGAGACCAGCCTGGCCAACATAGTGAAACCTGTCTCTACTAAAAATACAAGAAATTAGCCAGATGTGG

TGGCATGCACCTGTAATCCCAGCAATTCAGGAGGTTGAGGCAGGAGAAACACTTGAACCCGGGAGGCAGAGATT

GCAGTGAGGTGAGATTGTGCTACTGCACTCCAGCCTGGGCAACAGAGTGAGACT

>HCAR1

AGGCCAGGCACGGTGGCTCACGCCTGTGATCCCACCACTTTGGGAGGCCAAGGCAGGCCGGATCACCTGAGGTCA

GGAGCTCGAGACCAGCCTGGCCAACATGGCAAACCTGTCTCTACTAAAAATACAAAAATTAGCCGGGTGTGTT

GGCTGGCGCCTCTAATCCCAGCTACTCGGGAGGCTGAGGCAGGAGAATTGCTTGAACCCGGGAGGCAGAGGTTG

CAGTGAGCCGAGACTGTGCCACTGCACTCCAGCCTGGGACACAGAGTGAGACT

>hsamiR1972

TCAGGCCAGGCACAGTGGCTCA

>AANU01178229.1\_7254x6952\_RF00100\_7SK

AGGCCAGGCACAGTGGCTCATGCCTGTAATCCCAGCAATTTGGGAGGCTGAGGCAGGCCGGATCACCTGAGGTCA

GGAGTTCGAGACCAGCCTGGCCAACATAGTGAAACCTGTCTCTACTAAAAATACAAGAAATTAGCCAGATGTGG

TGGCATGCACCTGTAATCCCAGCAATTCAGGAGGTTGAGGCAGGAGAAACACTTGAACCCGGGAGGCAGAGATT

GCAGTGAGGTGAGATTGTGCTACTGCACTCCAGCCTGGGCAACAGAGTGAGACT

>OR7D2

AGGCCAGGCACAGTGGCTCACACCTGTAATCCCAGCACTTTGGGAGGCCGAGGTGGGCGTATCACCTGAGGTCA

GGAGTTCGAGACCAGCCTGGCCAACATGGTGAAACCTGTCTCTACTAAAAATAGAAGAATTAGCTGGGTGGGGT

GGCAGGTGCCTGTAGTCCCAGCTACTCAGGAGGTTGAGGCAGGAGAATCGCTTGAACCTGGGAGGTGGAGGTTG

CAGTGAGATGAGATCGCGCCACTGCACTCCAGCCTGGGCAACAGAGTGAGACT

>hsamiR1972

TCAGGCCAGGCACAGTGGCTCA

>AANU01178229.1\_7254x6952\_RF00100\_7SK

AGGCCAGGCACAGTGGCTCATGCCTGTAATCCCAGCAATTTGGGAGGCTGAGGCAGGCCGATCACCTGAGGTCA  
GGAGTTCGAGACCAGCCTGGCCAACATAGTGAAACCCCTGTCTCTACTAAAAATACAAGAAATTAGCCAGATGTGG  
TGGCATGCACCTGTAATCCCAGCAATTCAGGAGGTTGAGGCAGGAGAAACACTTGAACCCGGGAGGCAGAGATT  
GCAGTGAGGTGAGATTGTGCTACTGCACTCCAGCCTGGGCAACAGAGTGAGACT

>TMEM192

AGGCCGGGCACAGTGGCTCATGCCTGTAATCCCAACACTTTGGGAGGCCAAGGAGGGCGGATCAAAGGTCAGG  
AGTTTGAGACCAGCCTGGCCAGCATGGTGAAACCCCGCTGTACTAAAAATACAAAAATTAGCCAGGCATGGTGG  
CATGTGCCTGTAATCCCAGCTACTCAGCAGGCTGAGGTAGGAGAATTTCTTAATCCCGGGAGGCCGAGGTTGCAG  
TGAGCCGAGATCATGCTACTGCGCTCCAGCCTGGGCAACAGAGCGAGACT

>hsamiR1273a

GGGCGACAAAGCAAGACTCTTTCTT

>AluS

GGTGGCTCACACCTGTAATCCCAGCACTTTGGAAGGCCAAGGTGGGTGGATCACGAGGTCAGGAGTTCGAGACC  
AGCCTGGCCAACATAGTGAAACCCATCTCTACTAAAAATACAAAAATTAGCCGGGCGTGGTGGCGCTCGCCTATAA  
TCCCAGCTACTCAGCGGGCTGAGGCAGGAGAATTGCTTGAACCCGGGTGGTGGAGGTTGCAGTGAGCCAAGATT  
GCGCCACTGCACTCCAGCCTGGGCGACAAAGCAAGACT

>PTCD2

GGTGGCTCACTCCTATAATCCCAGCACTTTGGGAGGCCGAGGCCGGTGGACCACGAGGTCAGGAGTTCGAAACC  
AGCCTGGCCAACATAGTGAAACCCGTCTCTACTAAAAATACAAAAATTACCCGGGCGTGGTGGCGCACGCCTGT  
AGTCCCAACTACTCGGAAAGCTGAGGCAGGAGAATCGCTTGAACCCGGGAGGCCGAGGCTGCAGTGAGCCGAG  
ATCGCGCCACCGCACTCCAGCTTGGGCGACAGAGCAAGACT

>hsamiR1273a

GGGCGACAAAGCAAGACTCTTTCTT

>AluS

TCTTGGCTGGGCTTGGTGGCTCACACCTGTAATCCCAGCACTTTGGAAGGCCAAGGTGGGTGGATCACGAGGTCA  
GGAGTTCGAGACCAGCCTGGCCAACATAGTGAAACCCATCTCTACTAAAAATACAAAAATTAGCCGGGCGTGGTGG  
GCGCTCGCCTATAATCCCAGCTACTCAGCGGGCTGAGGCAGGAGAATTGCTTGAACCCGGGTGGTGGAGGTTGCA  
GTGAGCCAAGATTGCGCCACTGCACTCCAGCCTGGGCGACAAAGCAAGACT

>ZKSCAN3

TCTTGGCCGGGCATGGTGGCTCATGCCTGTAATCCCAGCACTTTGGTAGGCTGAGGCAGGAGGATCATGAGGTTA  
GGAGATCGAGACCATCCTGGCTAACACGGTAAAATCCCGTCTCTACTAAAAACATAAAAAATTAGCCGGGCATGG  
TGGCACACACCTGTAATCCCAGCTACTCAGGAGGCTGAGGCAGGAGAATCGCTTGAACCCAGGAGGTGGAGGTT  
GCAGTGAGCCAAGATTGTGCCACTGCACTCCAGCCTGGGCGACAGAGCAAGACT

>hsamiR544a

ATTCTGCATTTTTAGCAAGTTC

>MER5A1

GGGACCAAGATTCTGCATTTTTAGCAAGTTCTCAAGTGATGCTAATACCGCCGGTCTGTGGACAACACT

>CXorf23

GGGGCCAAGAATCTGCATTTTTAACAAAGTTCTCAGGTGATGCTGATGTTGCTGGTCTGGGACCACACT

>hsamiR2054

CTGTAATATAAATTTAATTTATT

>EnSpm2\_SB\_EnSpm\_Sorghum\_bicolor

ATAAATTTAATTTAT  
>RASGRP4  
ATAAATTTAATTTAT

>hsamiR3149  
TTTGTATGGATATGTGTGTGTAT  
>Chapaev\_8\_HM\_Chapaev\_Hydra\_magnipapillata  
TGTGTGTGTATGTGTGTGTAT  
>CDH6  
TGTGTGTGTATGTGTGTGTAT

>hsamiR3149  
TTTGTATGGATATGTGTGTGTAT  
>Chapaev\_8\_HM\_Chapaev\_Hydra\_magnipapillata  
TGTGTGTGTATGTGTGTGTAT  
>BRWD3  
TGTGTGTGTATGTGTGTGTAT

>hsamiR3149  
TTTGTATGGATATGTGTGTGTAT  
>Chapaev\_8\_HM\_Chapaev\_Hydra\_magnipapillata  
TGTGTGTGTATGTGTGTGTAT  
>KATNAL1  
TGTGTGTGTATGTGTGTGTAT

>hsamiR3149  
TTTGTATGGATATGTGTGTGTAT  
>Chapaev\_8\_HM\_Chapaev\_Hydra\_magnipapillata  
TGTGTGTGTATGTGTGTGTAT  
>CDH6  
TGTGTGTGTGTGTGTGTGTATGTGTGTGTAT

>hsamiR1277\_5p  
AAATATATATATATATGTACGTAT  
>EnSpm-8\_HM  
ATATATATATATATGTACGTATGT  
>BVES  
ATATATATATATATGTATGTATGTAT

>hsamiR1277\_5p  
AAATATATATATATATGTACGTAT  
>EnSpm-8\_HM  
TGTATATAAATGTATACGTAGATATATATGTAT  
>BVES  
TGTATATATATGTATATATATATATATATATGTATGTATGTAT

>hsamiR1277\_5p  
AAATATATATATATATGTACGTAT

>EnSpm-8\_HM  
ATATATATATATATGTACGTAT  
>CACNA1I  
ATATATATATATATGTATGTAT

>hsamiR1277\_5p  
AAATATATATATATATGTACGTAT  
>EnSpm-8\_HM  
TGTATATAAATGTATACGTAGATATATATGTAT  
>BVES  
TGTATATATATGTATATATATATATATATATGTATGTAT

>hsamiR1277\_5p  
AAATATATATATATATGTACGTAT  
>EnSpm-8\_HM  
ATATATATATATATGTACGTATGTGTATATAAATGTATACGTAGATATATATGTAT  
>ZBED3  
ATATATATGTATATGTATATATGTATATATATATGTATATATGTATATATATATATGTAT

>hsamiR1277\_5p  
AAATATATATATATATGTACGTAT  
>EnSpm-8\_HM  
TGTATATAAATGTATACGTAGATATATATGTAT  
>BVES  
TGTATATATATGTATATATATATATATATATGTAT

>hsamiR568  
ATGTATAAATGTATACACAC  
>EnSpm\_7\_HM\_EnSpm\_Hydra\_magnipapillata  
TATTATGTATAAATGTAT  
>PLSCR4  
TATTATGTATAAATGTAT

>hsamiR3673  
ATGGAATGTATATACGGAATA  
>DNA\_2\_12\_DR\_DNA\_transposon\_Danio\_erio  
ATATATATATGGAATATATATACAGAATATATATATATGTGGAATAT  
>ZNF571  
ATGGAATATATATATGGAATACATATGTGGAATATATACATATATGGTATAT

>hsamiR1277\_5p  
AAATATATATATATATGTACGTAT  
>EnSpm-8\_HM  
ATATATATATATATGTACGTATGTGTATAT  
>PPP4R2  
ATATATATATATATATGTATGTATATAT

>hsamiR1277\_5p



AAATATATATATATATGTACGTAT

>EnSpm-8\_HM

TATATATATATGTACGTATGTGTATATAAATGTATACGTAGATATATAT

>ZNF608

TATATATATATATATGTATATATACAGATATGTATACGTATATATATAT

>hsamiR1277\_5p

AAATATATATATATATGTACGTAT

>EnSpm-8\_HM

ATATATATATATATGTACGTATGTGTATATA

>GADL1

ATATATATATATATGTGTGTGTGTGTATATATATATAT

>hsamiR1277\_5p

AAATATATATATATATGTACGTAT

>EnSpm-8\_HM

ATATATATATATGTACGTATGTGTATATA

>ELF2

ATATATATATATGTATGTATATATATATAT

>hsamiR1277\_5p

AAATATATATATATATGTACGTAT

>EnSpm-8\_HM

ATATATATATATATGTA

>CREBZF

ATATATATATATATGTATATATATATAT

>hsamiR1277\_5p

AAATATATATATATATGTACGTAT

>EnSpm-8\_HM

AATATATATATATATGTA

>ZIC5

AATATATATATATATGTATATATATATAT

>hsamiR1277\_5p

AAATATATATATATATGTACGTAT

>EnSpm-8\_HM

AAATATATATATATATGTA

>IKZF4

AAATATATATATATATGTATATATATATAT

>hsamiR1277\_5p

AAATATATATATATATGTACGTAT

>EnSpm-8\_HM

ATATATATATATATGTACGTATGTGTATATA

>GADL1

ATATATATATATATGTGTGTGTGTGTATATATATATATAT

>hsamiR1277\_5p  
AAATATATATATATATGTACGTAT  
>EnSpm-8\_HM  
ATATATATATATGTACGTATGTGTATATA  
>ELF2  
ATATATATATATGTATGTATATATATATATAT

>hsamiR1277\_5p  
AAATATATATATATATGTACGTAT  
>EnSpm-8\_HM  
AATATATATATATATGTA  
>ZIC5  
AATATATATATATATGTATATATATATATAT

>hsamiR1277\_5p  
AAATATATATATATATGTACGTAT  
>EnSpm-8\_HM  
ATATATATATATATGTACGTATGTGTATATA  
>GADL1  
ATATATATATATATGTGTGTGTGTGTATATATATATATATAT

>hsamiR1277\_5p  
AAATATATATATATATGTACGTAT  
>EnSpm-8\_HM  
ATATATATATATGTACGTATGTGTATATA  
>ELF2  
ATATATATATATGTATGTATATATATATATATAT

>hsamiR1277\_5p  
AAATATATATATATATGTACGTAT  
>EnSpm-8\_HM  
ATATATATATATGTACGTATGTGTATATA  
>GADL1  
ATATATATATATATGTGTGTGTGTGTATATATATATATATATAT

>hsamiR1277\_5p  
AAATATATATATATATGTACGTAT  
>EnSpm-8\_HM  
ATATATATATATGTACGTATGTGTATATA  
>ELF2  
ATATATATATATGTATGTATATATATATATATATAT

>hsamiR1277\_5p  
AAATATATATATATATGTACGTAT  
>EnSpm-8\_HM  
ATATATATATATGTACGTATGTGTATATA  
>ELF2  
ATATATATATATGTATGTATATATATATATATATAT

>hsamiR1277\_5p  
AAATATATATATATATGTACGTAT  
>EnSpm-8\_HM  
ATATATATATATGTACGTATGTGTATATA  
>ELF2  
ATATATATATATGTATGTATATATATATATATATATAT

>hsamiR1277\_5p  
AAATATATATATATATGTACGTAT  
>EnSpm-8\_HM  
CAAATATATATATATAT  
>SHOX2  
CAAATATATATATATATATATATATATATATATAT

>hsamiR1277\_5p  
AAATATATATATATATGTACGTAT  
>EnSpm-8\_HM  
CAAATATATATATATAT  
>PAQR3  
CAAATATATATATATATATATATATATATATATAT

>hsamiR1277\_5p  
AAATATATATATATATGTACGTAT  
>EnSpm-8\_HM  
CCCAAATATATATATATAT  
>BMP2K  
CCCAAATATATATATATATATATATATATATATATAT

>hsamiR1277\_5p  
AAATATATATATATATGTACGTAT  
>EnSpm-8\_HM  
CAAATATATATATATAT  
>PAQR3  
CAAATATATATATATATAT

>hsamiR1277\_5p  
AAATATATATATATATGTACGTAT  
>EnSpm-8\_HM  
CAAATATATATATATAT  
>SHOX2  
CAAATATATATATATATAT

>hsamiR1277\_5p  
AAATATATATATATATGTACGTAT  
>EnSpm-8\_HM  
CCCAAATATATATATATAT  
>BMP2K  
CCCAAATATATATATATATAT

>hsamiR1277\_5p  
AAATATATATATATATGTACGTAT  
>EnSpm-8\_HM  
CAAATATATATATATAT  
>PAQR3  
CAAATATATATATATATAT

>hsamiR1277\_5p  
AAATATATATATATATGTACGTAT  
>EnSpm-8\_HM  
CAAATATATATATATAT  
>TRAM1  
CAAATATATATATATATAT

>hsamiR1277\_5p  
AAATATATATATATATGTACGTAT  
>EnSpm-8\_HM  
CAAATATATATATATAT  
>SHOX2  
CAAATATATATATATATAT

>hsamiR1277\_5p  
AAATATATATATATATGTACGTAT  
>EnSpm-8\_HM  
CCCAAATATATATATATAT  
>BMP2K  
CCCAAATATATATATATATAT

>hsamiR1277\_5p  
AAATATATATATATATGTACGTAT  
>EnSpm-8\_HM  
CAAATATATATATATAT  
>GPRASP1  
CAAATATATATATATAT

>hsamiR1277\_5p  
AAATATATATATATATGTACGTAT  
>EnSpm-8\_HM  
CAAATATATATATATAT  
>SHOX2  
CAAATATATATATATAT

>hsamiR1277\_5p  
AAATATATATATATATGTACGTAT  
>EnSpm-8\_HM  
CAAATATATATATATAT  
>TRAM1  
CAAATATATATATATAT

>hsamiR1277\_5p  
AAATATATATATATATGTACGTAT  
>EnSpm-8\_HM  
CAAATATATATATATAT  
>PAQR3  
CAAATATATATATATAT

>hsamiR1277\_5p  
AAATATATATATATATGTACGTAT  
>EnSpm-8\_HM  
CCAAATATATATATATAT  
>MYADM  
CCAAATATATATATATAT

>hsamiR1277\_5p  
AAATATATATATATATGTACGTAT  
>EnSpm-8\_HM  
CCCAAATATATATATATAT  
>BMP2K  
CCCAAATATATATATATAT

>hsamiR3673  
ATGGAATGTATATACGGAATA  
>DNA\_2\_12\_DR\_DNA\_transposon\_Danio\_erio  
ATATATATATGGAATATACATATGGAATATATATATAT  
>ZNF571  
ATGGAATATATATATGGAATACATATGTGGAATATATACATAT

>hsamiR3673  
ATGGAATGTATATACGGAATA  
>DNA\_2\_12\_DR\_DNA\_transposon\_Danio\_erio  
ATATATATATGGAATATATATACGGAATATATATATAT  
>ZNF571  
ATGGAATATATATATGGAATACATATGTGGAATATATACATAT

>hsamiR3673  
ATGGAATGTATATACGGAATA  
>DNA\_2\_12\_DR\_DNA\_transposon\_Danio\_erio  
ATATATATATGGAATGTATATACGGAATATATATATAT  
>ZNF571  
ATGGAATATATATATGGAATACATATGTGGAATATATACATAT

>hsamiR3673  
ATGGAATGTATATACGGAATA  
>DNA\_2\_12\_DR\_DNA\_transposon\_Danio\_erio  
ATATACATATGGAATATATATATATACGGAATATATATATGGAATATATATATAT  
>ZNF571  
ATATACATATGGAATATATATATGGAATACATATGTGGAATATATACATAT

>hsamiR3673  
ATGGAATGTATATACGGAATA  
>DNA\_2\_12\_DR\_DNA\_transposon\_Danio\_erio  
ATATATATATGGAATATACATATGGAATATATAT  
>ZNF571  
ATATACATATGGAATATATATATGGAATACATAT

>hsamiR3673  
ATGGAATGTATATACGGAATA  
>DNA\_2\_12\_DR\_DNA\_transposon\_Danio\_erio  
ATATATATATGGAATATATATACGGAATATATAT  
>ZNF571  
ATATACATATGGAATATATATATGGAATACATAT

>hsamiR3673  
ATGGAATGTATATACGGAATA  
>DNA\_2\_12\_DR\_DNA\_transposon\_Danio\_erio  
ATATATATGTGGAATATATATACGGAATATATAT  
>ZNF571  
ATATACATATGGAATATATATATGGAATACATAT

>hsamiR3673  
ATGGAATGTATATACGGAATA  
>DNA\_2\_12\_DR\_DNA\_transposon\_Danio\_erio  
ATATATATGTGGAATATATATAAGGAATATATAT  
>ZNF571  
ATATACATATGGAATATATATATGGAATACATAT

>hsamiR548a\_3p  
CAAAACTGGCAATTACTTTTGC  
>MADE1  
CAATTACTTTTGCACCAAATAATAT  
>ALG10  
CAATTACTTTTGCACCTAACCTAATAT

>hsamiR548aa  
AAAAACCACAATTACTTTTGCACCA  
>MADE1  
TTTTGCCATTACTTTTACAGGCAAAAACCACAATTACTTTTGCACCAACCTAATAT  
>ALG10  
TTTTGCCATTACTTTCAATGGCAAAAACCACAATTACTTTTGCACCTAACCTAATAT

>hsamiR548aa  
AAAAACCACAATTACTTTTGCACCA  
>MADE1  
GGCAAAAACCACAATTACTTTTGCACCAACCTAATAT  
>SUMF1  
GGCAAAAACCTGCAATTACTTTTGCACCAACCTAATAT

>hsamiR548a\_3p  
CAAAACTGGCAATTACTTTTGC  
>MADE1  
TAATGGCAAAAACCTGCAATTACTTTTGCACCAAATAATAT  
>SUMF1  
TAATGGCAAAAACCTGCAATTACTTTTGCACCAACCTAATAT

>hsamiR548aa  
AAAAACCACAATTACTTTTGCACCA  
>MADE1  
GCAAAAACCACAATTACTTTTGCACCAACCTAATAT  
>PGM3  
GCAAAAACCGCAATTACGTTTGCACCAACCTAATAT

>hsamiR548aa  
AAAAACCACAATTACTTTTGCACCA  
>MADE1  
CAATTACTTTTGCACCAACCTAATAT  
>AC103588.1.1  
CAATTACTCTTGCACCAACCTAATAT

>hsamiR3689b\_3p  
CTGGGAGGTGTGATATTGTGGT  
>Copia\_131\_SB\_I\_Copia\_Sorghum\_bicolor  
CTCACTGGGAGGTGTGAT  
>PLEKHA7  
CTCACTGGGAGGTGTGAT

>hsamiR1304\_5p  
TTTGAGGCTACAGTGAGATGTG  
>ALU\_SINE1\_7SL\_Primates  
CAGCTACTCTGGAGGCTAAGGCAGGAGAAACACTTGAGCCCAGCGGTTTGAGGCTACAGTGAGATGTGAT  
>C1orf64  
CAGCTACTCGGGAGGCTGAGGCAGGAGGATCACTTGAGCCCAGGAGTTTGAGGCTGCAGTGAGCTGTGAT

>hsamiR1304\_3p  
TCTCACTGTAGCCTCGAACCCC  
>ALU\_SINE1\_7SL\_Primates  
CACATCTCACTGTAGCCTCGAACCCCTGGGCTCAAGTGAT  
>DFFA  
CACAGCTCATTGTAGCCTCGAACTCCTGGGCTCAAGTGAT

>hsamiR340\_5p  
TTATAAAGCAATGAGACTGATT  
>MARNA  
AGCAATGAGACTGAT  
>PSMA2  
AGCAATGAGACTGAT

>hsamiR548h\_5p  
AAAAGTAATCGCGGTTTTTGTC  
>MADE1  
GTATTAGGTTGGTGCAAAAGTAATCGCGGTTTTTGTCAT  
>MTMR6  
GTATTAGGTTGGTGCAAAAGTAATTGCGGTTTTTGTCAT

>hsamiR598  
TACGTCATCGTTGTCATCGTCA  
>CACTA\_LP  
TCATCGTTGTCATCGTCATCATCAT  
>TGFB2  
TCATCGTTGTCGTCGTCATCATCAT

>hsamiR548g\_5p  
TGCAAAAGTAATTGCAGTTTTTG  
>MADE1  
TTAGTGCAAAAGTAATTGCAGTTTTTGAT  
>ZNF154  
TTAGTGCAAAAGTAATTGCCGTTTTTGAT

>hsamiR1271\_3p  
AGTGCCTGCTATGTGCCAGGCA  
>L2B  
ATTTGTTGAGTGCCTGCTATGTGCCAGGCAT  
>CDS2  
ATTTATTGAGTGCTTACTATGTGCCAGGCAT



>hsamiR548i  
AAAAGTAATTGCGGATTTTGCC  
>MADE1  
TGTTAGGTTGGTGCAAAAGTAATTGCGGATTTTGCCAT  
>KATNAL1  
TGTTAGGCTGGTGCAAAAGTAATTGCGGTTTTTGCCAT

>hsamiR548q  
GCTGGTGCAAAAGTAATGGCGG  
>MADE1  
TGGTGCAAAAGTAATGGCGGTTTTTGCCAT  
>CDC27  
TGGTGCAAAAGTAATTGCAGGTTTTTGCCAT

>hsamiR548v  
AGCTACAGTACTTTTGACCA  
>MADE1  
TACTTTTGACCAAGCCTAAT  
>TCEANC2  
TACTTTTGACCAACCTAAT

>hsamiR548a\_3p  
CAAACTGGCAATTACTTTTGCC  
>MADE1  
CAATTACTTTTGACCAACGTAAT  
>TCEANC2  
CAATTACTTTTGACCAACCTAAT

>hsamiR548aa  
AAAAACCACAATTACTTTTGACCA  
>MADE1  
GGCAAAAACCACAATTACTTTTGACCAACCTAAT  
>TCEANC2  
GGCAAAAACCACAATTACTTTTGACCAACCTAAT

>hsamiR548h\_3p  
CAAAAACCGCAATTACTTTTGCA  
>MADE1  
TAATGACAAAACCGCAATTACTTTTGACCAACCTAAT  
>TCEANC2  
TAATGGCAAAAACCACAATTACTTTTGACCAACCTAAT

>hsamiR548u  
CAAAGACTGCAATTACTTTTGCG  
>MADE1  
TAATGGCAAAGACTGCAATTACTTTTGCGCCAACCTAAT  
>TCEANC2  
TAATGGCAAAAACCACAATTACTTTTGACCAACCTAAT

>hsamiR548a\_3p

CAAAACTGGCAATTACTTTTGC

>MADE1

AAGTAATGGCAAAACTGGCAATTACTTTTGCACCAAATAAT

>TCEANC2

AAGTAATGGCAAAAACCACAATTACTTTTGCACCAACCTAAT

>hsamiR603

CACACACTGCAATTACTTTTGC

>MADE1

AAGTAATGGCACACACTGCAATTACTTTTGTCCAATAAT

>TCEANC2

AAGTAATGGCAAAAACCACAATTACTTTTGCACCAACCTAAT

>hsamiR548d\_3p

CAAAAACCACAGTTTCTTTTGC

>MADE1

AAGTAATGGCAAAAACCACAGTTTCTTTTGCACCAACCTAAT

>TCEANC2

AAGTAATGGCAAAAACCACAATTACTTTTGCACCAACCTAAT

>hsamiR548aa

AAAAACCACAATTACTTTTGCACCA

>MADE1

GGCAAAAACCACAATTACTTTTGCACCAACCTAAT

>ITSN1

GGCAAAAACCGCAATCACTTTTGCACCAACCTAAT

>hsamiR548h\_3p

CAAAAACCGCAATTACTTTTGC

>MADE1

AATGACAAAAACCGCAATTACTTTTGCACCAACCTAAT

>ITSN1

AATGGCAAAAACCGCAATCACTTTTGCACCAACCTAAT

>hsamiR3673

ATGGAATGTATATACGGAATA

>DNA\_2\_12\_DR\_DNA\_transposon\_Danio\_rerio

ATATATATATGGAATGTATATACGGAATATATATATATATGGAATGTATATACGGAATATATATATATATGGAAT

>ZNF571

ATGGAATATATATATGGAATACATATGTGGAATATATACATATATGGTATATGGAATATATACATATATGGAAT

>hsamiR548aa

AAAAACCACAATTACTTTTGCACCA

>MADE1

CAATTACTTTTGCACCAACCTAAT

>CD38

CAATTACTTTTGCACCAACTTAAAT

>hsamiR548aa

AAAAACCACAATTACTTTTGCACCA

>MADE1

TTATTAGGTTGGTGCAAAAGAACTGTGGTTTTTGCATTACTTTCAATGGCAAAAACCACAATTACTTTTGCACCA  
ACCTAAAT

>CD38

TTATTAGGTTGGTTCAAAATAATTGTGGTTTTTGCATTCTTTTCGGTGGCAAACTTGAATTACTTTTGCACCAAC  
TTAAAT

>hsamiR548aa

AAAAACCACAATTACTTTTGCACCA

>MADE1

AATGGCAAAAACCACAATTACTTTTGCACCAACCTAAAT

>HLA-DMB

AATGGCAAAAAGTGAATTACTTTTGCACCAACCTAAAT

>hsamiR342\_3p

TCTCACACAGAAATCGCACCCGT

>MamSINE1

TGTCTCACACAGAAAT

>SLCO1A2

TGTCTCACACAGAAAT

>hsamiR548n

CAAAAGTAATTGTGGATTTTGT

>MADE1

TAGGTTGGTGCAAAAGTAATTGTGGATTTTGTTCGTTAAAAAT

>RABL5

TAGGTTGGTGCAAAAGTAATAGTGGCTTTTGCATTAAAAAT

>hsamiR548j

AAAAGTAATTGCGGTCTTTGGT

>MADE1

GCAAAAGTAATTGCGGTCTTTG

>ANKRD5

GCAAAAGTAATTGCGGTTTTTG

>hsamiR548h\_5p

AAAAGTAATCGCGGTTTTTGTC

>MADE1

GCAAAAGTAATCGCGGTTTTTG

>ANKRD5

GCAAAAGTAATTGCGGTTTTTG

>hsamiR548h\_5p

AAAAGTAATCGCGGTTTTTGTC

>MADE1

TGGTGCAAAAGTAATCGCGGTTTTTG

>HLA-DMB  
TGGTGCAAAAGTAATTGCGGTTTTTG

>hsamiR548d\_5p  
AAAAGTAATTGTGGTTTTTGCC  
>MADE1  
TTAGGTTGGTGCAAAAGTAATTGTGGTTTTTG  
>MTMR6  
TTAGGTTGGTGCAAAAGTAATTGCGGTTTTTG

>hsamiR548w  
AAAAGTAACTGCGGTTTTTGCC  
>MADE1  
TTAGGTTGGTGCAAAAGTAACTGCGGTTTTTG  
>MTMR6  
TTAGGTTGGTGCAAAAGTAATTGCGGTTTTTG

>hsamiR548d\_5p  
AAAAGTAATTGTGGTTTTTGCC  
>MADE1  
TATTAGGTTGGTGCAAAAGTAATTGTGGTTTTTG  
>MTMR6  
TATTAGGTTGGTGCAAAAGTAATTGCGGTTTTTG

>hsamiR548i  
AAAAGTAATTGCGGATTTTGCC  
>MADE1  
TATTAGGTTGGTGCAAAAGTAATTGCGGATTTTG  
>MTMR6  
TATTAGGTTGGTGCAAAAGTAATTGCGGTTTTTG

>hsamiR548i  
AAAAGTAATTGCGGATTTTGCC  
>MADE1  
TATTAGTTTGGTGCAAAAGTAATTGCGGATTTTG  
>MTMR6  
TATTAGGTTGGTGCAAAAGTAATTGCGGTTTTTG

>hsamiR548i  
AAAAGTAATTGCGGATTTTGCC  
>MADE1  
TATTAGGTTTGTGCAAAAGTAATTGCGGATTTTG  
>MTMR6  
TATTAGGTTGGTGCAAAAGTAATTGCGGTTTTTG

>hsamiR548x\_5p  
TGCAAAAGTAATTGCAGTTTTTG  
>MADE1

TATTAGGTTAGTGCAAAAGTAATTGCAGTTTTTG  
>MTMR6  
TATTAGGTTGGTGCAAAAGTAATTGCGGTTTTTG

>hsamiR548j  
AAAAGTAATTGCGGTCTTTGGT  
>MADE1  
CTGGTGCAAAAGTAATTGCGGTCTTTG  
>HLA-DMB  
CTGGTGCAAAAGTAATTGCGGTTTTTG

>hsamiR548j  
AAAAGTAATTGCGGTCTTTGGT  
>MADE1  
GCTGGTGCAAAAGTAATTGCGGTCTTTG  
>KATNAL1  
GCTGGTGCAAAAGTAATTGCGGTTTTTG

>hsamiR548n  
CAAAAGTAATTGTGGATTTTGT  
>MADE1  
AGGTTGGTGCAAAAGTAATTGTGGATTTTG  
>ANKRD5  
AGGTTGGAGCAAAAGTAATTGCGGTTTTTG

>hsamiR548h\_5p  
AAAAGTAATCGCGGTTTTTGTC  
>MADE1  
AGGTTGGTGCAAAAGTAATCGCGGTTTTTG  
>ANKRD5  
AGGTTGGAGCAAAAGTAATTGCGGTTTTTG

>hsamiR548x\_5p  
TGCAAAAGTAATTGCAGTTTTTG  
>MADE1  
GTGCAAAAGTAATTGCAGTTTTTG  
>MC2R  
GTGCAAAAGTAATTGCAATTTTTG

>hsamiR548g\_5p  
TGCAAAAGTAATTGCAGTTTTTG  
>MADE1  
TAGATTAGTGCAAAAGTAATTGCAGTTTTTG  
>MC2R  
TAGATTGGTGCAAAAGTAATTGCAATTTTTG

>hsamiR548b\_5p  
AAAAGTAATTGTGGTTTTGGCC

>MADE1  
TTAGGTTGGCGCAAAAGTAATTGTGGTTTTG  
>CD38  
TTAGGTTGGTTCAAAATAATTGTGGTTTTG

>hsamiR548f  
AAAAACTGTAATTACTTTT  
>MADE1  
TAATGACAAAAACTGTAATTACTTTTG  
>SUMF1  
TAATGGCAAAAACTGCAATTACTTTTG

>hsamiR548f  
AAAAACTGTAATTACTTTT  
>MADE1  
TGGTGCAAAAAGTAATAGTGGTTTTTGCCATTAAGTAATGACAAAAACTGTAATTACTTTTG  
>HLA-DMB  
TGGTGCAAAAAGTAATTGCGGTTTTTGCCACTGAAAGTAATGGCAAAAACTGCAATTACTTTTG

>hsamiR421  
ATCAACAGACATTAATTGGGCGC  
>MIR2\_Repetitive\_sequence\_Mammalia  
TCATCAACAGACATTAATTG  
>LCK  
TCATCAACAGACATTTATTG

>hsamiR574\_5p  
TGAGTGTGTGTGTGAGTGTGT  
>hAT-N53\_DR  
GTGTGTGTGTGTGAGTGTGTG  
>GABRB2  
GTGTGTGTGTGTGTGTGTGTG

>hsamiR574\_5p  
TGAGTGTGTGTGTGAGTGTGT  
>hAT-N53\_DR  
GTGTGAGTGTGTGTGTGTGAGTGTGTG  
>STXBP6  
GTGTGTGTGTGTGTGTGTGTGTG

>hsamiR574\_5p  
TGAGTGTGTGTGTGAGTGTGT  
>hAT-N53\_DR  
GTGTGAGTGTGTGTGTGTGAGTGTGTG  
>DCAKD  
GTGTGTGTGTGTGTGTGTGTGTG

>hsamiR574\_5p

TGAGTGTGTGTGTGTGAGTGTGT  
>hAT-N53\_DR  
GTGTGAGTGTGTGTGTGTGAGTGTGTG  
>AL020996.1  
GTGTGTGTGTGTGTGTGTGTGTGTGTG

>hsamiR574\_5p  
TGAGTGTGTGTGTGTGAGTGTGT  
>hAT-N53\_DR  
GTGTGAGTGTGTGTGTGTGAGTGTGTG  
>BTBD9  
GTGTGTGTGTGTGTGTGTGTGTGTGTG

>hsamiR574\_5p  
TGAGTGTGTGTGTGTGAGTGTGT  
>hAT-N53\_DR  
GTGTGAGTGTGTGTGTGTGAGTGTGTG  
>FOXN3  
GTGTGTGTGTGTGTGTGTGTGTGTGTG

>hsamiR574\_5p  
TGAGTGTGTGTGTGTGAGTGTGT  
>hAT-N53\_DR  
GTGTGAGTGTGTGTGTGTGAGTGTGTGT  
>STXBP6  
GTGTGTGTGTGTGTGTGTGTGTGTGTG

>hsamiR574\_5p  
TGAGTGTGTGTGTGTGAGTGTGT  
>hAT-N53\_DR  
GTGTGAGTGTGTGTGTGTGAGTGTGTGT  
>DCAKD  
GTGTGTGTGTGTGTGTGTGTGTGTGTG

>hsamiR574\_5p  
TGAGTGTGTGTGTGTGAGTGTGT  
>hAT-N53\_DR  
GTGTGAGTGTGTGTGTGTGAGTGTGTGT  
>AL020996.1  
GTGTGTGTGTGTGTGTGTGTGTGTGTG

>hsamiR574\_5p  
TGAGTGTGTGTGTGTGAGTGTGT  
>hAT-N53\_DR  
GTGTGAGTGTGTGTGTGTGAGTGTGTGT  
>BTBD9  
GTGTGTGTGTGTGTGTGTGTGTGTGTG

>hsamiR574\_5p  
TGAGTGTGTGTGTGTGAGTGTGT  
>hAT-N53\_DR  
GTGTGAGTGTGTGTGTGTGAGTGTGTGT  
>FOXN3  
GTGTGTGTGTGTGTGTGTGTGTGTGTGTGTGTG

>hsamiR574\_5p  
TGAGTGTGTGTGTGTGAGTGTGT  
>hAT-N53\_DR  
GTGTGAGTGTGTGTGTGTGAGTGTGTGT  
>STXBP6  
GTGTGTGTGTGTGTGTGTGTGTGTGTGTGTGTG

>hsamiR574\_5p  
TGAGTGTGTGTGTGTGAGTGTGT  
>hAT-N53\_DR  
GTGTGAGTGTGTGTGTGTGAGTGTGTGT  
>DCAKD  
GTGTGTGTGTGTGTGTGTGTGTGTGTGTGTGTG

>hsamiR574\_5p  
TGAGTGTGTGTGTGTGAGTGTGT  
>hAT-N53\_DR  
GTGTGAGTGTGTGTGTGTGAGTGTGTGT  
>AL020996.1  
GTGTGTGTGTGTGTGTGTGTGTGTGTGTGTGTG

>hsamiR574\_5p  
TGAGTGTGTGTGTGTGAGTGTGT  
>hAT-N53\_DR  
GTGTGAGTGTGTGTGTGTGAGTGTGTGT  
>BTBD9  
GTGTGTGTGTGTGTGTGTGTGTGTGTGTGTGTG

>hsamiR574\_5p  
TGAGTGTGTGTGTGTGAGTGTGT  
>hAT-N53\_DR  
GTGTGAGTGTGTGTGTGTGAGTGTGTGT  
>FOXN3  
GTGTGTGTGTGTGTGTGTGTGTGTGTGTGTGTG

>hsamiR574\_5p  
TGAGTGTGTGTGTGTGAGTGTGT  
>hAT-N53\_DR  
GTGTGAGTGTGTGTGTGTGAGTGTGTGT  
>STXBP6  
GTGTGTGTGTGTGTGTGTGTGTGTGTGTGTGTG











>hsamiR574\_5p  
TGAGTGTGTGTGTGAGTGTGT  
>hAT-N53\_DR  
GTGAGTGTGTGTGTGAGTGTG  
>CD22  
GTGAGTGTGTGTGTGTGTGTG

>hsamiR574\_5p  
TGAGTGTGTGTGTGAGTGTGT  
>hAT-N53\_DR  
GTGTGAGTGTGTGTGTGAGTGTGT  
>CD22  
GTGTGTGTGTGTGTGTGTGCGTGTGTGTGTGTGTG

>hsamiR574\_5p  
TGAGTGTGTGTGTGAGTGTGT  
>hAT-N53\_DR  
GTGTGAGTGTGTGTGTGAGTGTGT  
>CD22  
GTGTGTGTGTGTGTGTGTGCGTGTGTGTGTGTGTG

>hsamiR574\_5p  
TGAGTGTGTGTGTGAGTGTGT  
>hAT-N53\_DR  
GTGTGAGTGTGTGTGTGTG  
>AFF2  
GTGTGAGTGTGTGTGTGTG

>hsamiR574\_5p  
TGAGTGTGTGTGTGAGTGTGT  
>hAT-N53\_DR  
GTGTGTGTGTGTGAGTGTGT  
>AFF2  
GTGTGTGTGTGTGAGTGTGTGTGTGTG

>hsamiR574\_5p  
TGAGTGTGTGTGTGAGTGTGT  
>hAT-N53\_DR  
GTGTGAGTGTGTGTGTGAGTGTGT  
>CD22  
GTGTGTGTGTGTGTGTGTGCGTGTGTGTGTGTG

>hsamiR574\_5p  
TGAGTGTGTGTGTGAGTGTGT  
>hAT-N53\_DR  
GTGTGAGTGTGTGTGTG  
>AFF2  
GTGTGAGTGTGTGTGTG

>hsamiR574\_5p  
TGAGTGTGTGTGTGTGAGTGTGT  
>hAT-N53\_DR  
GTGTGTGTGTGTGAGTGTGTGT  
>AFF2  
GTGTGTGTGTGTGAGTGTGTGTGTGTG

>hsamiR574\_5p  
TGAGTGTGTGTGTGTGAGTGTGT  
>hAT-N53\_DR  
GTGTGAGTGTGTGTGTGTG  
>KATNAL1  
GTGTGAGTGTGTGTGTGTG

>hsamiR421  
ATCAACAGACATTAATTGGGCGC  
>MIR2\_Repetitive\_sequence\_Mammalia  
TCATCAACAGACATTAATTGGGCGCCTGCTCTGTG  
>LCK  
TCATCAACAGACATTTATTGAACTCCTGATGTGTG

>hsamiR574\_5p  
TGAGTGTGTGTGTGTGAGTGTGT  
>hAT-N53\_DR  
GAGTGTGTGTGTGTGAGTGTG  
>NAA11  
GAGTGTGTGTGTGTGAGTGTG

>hsamiR297  
ATGTATGTGTGCATGTGCATG  
>ERV1\_N6\_I\_DR\_ERV1\_Danio\_rerio  
TGTATGTGTGCATGTGCATGTATGTGT  
>SCARA3  
TGTATGTGTGCATGTGCGTGTATGTGTGCATGTG

>hsamiR1268a  
CGGGCGTGGTGGTGGGG  
>AluYc2\_Repetitive\_sequence\_Homo\_sapiens  
GCTCACGCCTGTAATTCCAGCACTTTGGGAGGCTGAGGTGGTGGATCACCTGAGGTCAGGAGTTCGAAACCAGC  
CTGGCCAACATGGAGAAAC  
>ZNF713  
GCTCACGCCTATAATCCCAGCACTTTGGGAGGCCGAGGCGGGCAGATCACAAGGTCAGGAGTTCGAGACCAGCCT  
AGTCAATATGGTGAACCGTGTCTCTACTAAAAAATACAAAAAAGTTAGCCAGGCGTGGTGGTACGCACCTG  
TAGTCCCAGCTACTCGGGAGGCTGAAGCAGAAGAATCGCTGGAACCCAGGAGGTGGAGGTTGCTGTGAGCCGAG  
ATCGCGCCATTGCACTCCAGCCTGGGTGGCAGAGCGAGACTCTGCCTCAAAAAAAAAAAAAAAAAAAGTTTTAT  
ACCATAAACTTACAGGTGAGTAATTACAAGTTGTTGCCTATAGGCTTTCTTTCTTTTTTTTTTTTGGAGACAGAGTCT  
TGCTCTGTTGCCAGGCTGGAGTACAGTGGCATGATCTCAGCTCACAGCAACCTCCACCTCCCATGTTCAAGTCATT

CTCATGCCTCAGTCTCCAGAGTAGCTGGGATTGCAGGTGTGCACCACCATGCCTGGATAAAGGACTTCTGATTTTTT  
AAAAAGTTTTATATCAGATTTGGAACATGACTCCAAATATAATCTCATTTGTAAAATAAATTATTTTTCTTTTTATA  
ACCCCTCCTGGGAATGTAATATGCTGCTAGTTAAGGTCTAAATTAATTTGGTTTCTACGCATTGAAAGTTTATGGC  
CAGGCGCAGTGGCCACGCCTGTAATCCCAGCACTTTGGGAGGCCGAGGTGGCGGATCACCTGAGGTTAGGAG  
TTCGAGACCAGCCTGGCCAACATGGTGAAACCCCGTCTCTACTAAAAATACAAAAATTAGCTGGGCGTGGTGGT  
G

>hsamiR1285\_3p

TCTGGGCAACAAAGTGAGACCT

>AluJb

GGTGGCTCATGCCTGTAATCCCAGCACTTTGGGAGGCCGAGGCAGGCGGATGACCTGAGGTCAGGAATTCGAGA  
CCAGCCTGGCCAATATGGTGAAACCCCATCTCTACTAAAAATACAAAAATTGGCCGGGTGTGGTGGCAGGCGCTT  
GTAATCCCAGCAACTCAGGAGGCTGAGGCAGGAGAATTGCTTGAACCCGGGAGGTGGAGGTTGCAGTG

>SLC25A34

CTGGGCAACAAAGCGAGACTCCATCTCAAAAAAAAAAGATGATGTTGGCTGAACTGCGGCCCTGCAGAAGTGCAT  
GTTGAAGTCTACCCCTAGTAGCTCAGGATGTGACTGTATATGGAGATAGGCTCTTGACAGAGATAATTAAGTTA  
AAATTGGGCCAAGTGAGGTGGCTCATGCCTGTAATCCCAGCACTTTGGGAGGCCAAGGCCAGTGGATCACTTGAG  
GTCAGGAGTTCGAGACCAGTCTGGCCAACATGGCAAAACCCCATCTCTACTAAAGATACAAAAATTGGCCGGGTG  
TGGTGGCACACACCTGTAATCCCAGCTACTCAGGAGGCTGGGGCAGGAGAATTGCTTGAACCTAGGAGGCCAAG  
GTTGCAGTG

>hsamiR1255b2\_3p

AACCACTTTCTTTGCTCATCCA

>TIGGER1

AGAAACCACTTTCTTTGCTCATCCATAAGGAGCAACTCCTTATCTG

>FNNTA

AGAAACCACTTTCTTTGCTCATCCATAAGAAGCGACTCCTCATCTG

>hsamiR3118

TGTGACTGCATTATGAAAATTCT

>L1PA13\_5

TAATCTCATATTTCTTGGATGTTTTGTTTCATTATTTTCTTCTTTTTCCCCATTCTTGCTGCCTGTTTTATTTT  
AAGCCAGTTTTCAAGCTCTGGGATTCTTTCCTCTGCTTGGTCTATTCTGCTGGGTGGTCTTGACATGAGATGGAGC  
TGGTTTGACCTCAGCCCTCCTTAGTCTGCTTGCTCTCCAGGACCCAGCCTGGCCACACCTGCTTACAGGGCAAT  
CTCAGGTGCCACACACTACAATAATTTTATAATGCAATCACACATAATCACTATGTGACTGCATTATGAAAAT  
TCTTGTAGTGTGCTTTTCAAGCTCTATTAGGTCGGTTGTGTCTTCTTTATACTTGCTATTTTGTCTGTTAGCTCCTACAA  
TGTGTTACAATGATTTTATGCTCACTTGTATTGCATGACAACATACGTCTTCACTCAGTGAACCTTTGTTTCTACGCA  
TATCCTGAACCCTGCTTGTATCATTCCAGACATCTCAGCCTCAGCCAGTTCTGAACACTTGCTGGAGAGTTGATAC  
AGTCATTTGGAGGAAAGAAAGCATGCTG

>POTEC

TAATCCCATATTTCTCGGATGTTTTGTTTCATTCCCTTTTCTTCTTTTTCCCCATTCTTGTTGCTGTTTTATTTT  
AAGCCAGTTTTCAAGCTCTGGGATTCTTTCCTCTTCTTGGTCTATTCTGTTAGATGGTCTTGACATGAGATGGAGC  
TGGTCTGACCTCAGCCCTCCCTAGTCTGCTTGCTCTCCAGGACCCAGCCTGGCCACACCTGCTTACAGGGCACT  
CTCAGGTGCCACACATACTACAATAATTTTATAATGCAATCACACACAATCACTATGTGACTACATTATGAAAAT  
TCTTCTAGTGTGATTTACAGCTCTGTCAGGTCAGTTATTTTCTTCTTTATACTCACTATTTTGTCTGTTAGTTCTGCA  
ATGTTTTACAATGATTTTATGCTTCTTGTATTGGATTACAACATACTTCTTCACTCAATGAACCTTTGTTTCTACCCA

TATCCTGAACTCTGCTTGTATCATTTTCAGACATCTCAGCCTCAGCCCAGTTCTGAACACTTGCTGGAGAGTTGATGC  
AGTCATTTGGAGAAAAGAAGGTATGCTG

>hsamiR1273d

GAACCCATGAGGTTGAGGCTGCAGT

>AluSq

GAAACCCCATCTCTACTAAAACCACAAAAATTAACCTGGTGGTGTGTTGGGCACCTGTAATCCCAGCTACTCGGTA  
GGCTGAGGTAGGAGAATCGCTTGAACCCATGAGGTTGAGGCTGCAGTGAGCCAAGATCGTGCCACTGCACTTCA  
GCCTG

>TRAPPC2

GAAACCCCGTCTCTACTAAAACACAAAAATTAGCCAGGTGTGGTGGTGCATGCCTGTAATCCCAGCTACTCGGGA  
GGCTGAAGAAGGAGAATTGCTTGAACCCAGGAGGTGGAGGTTGCAGTGAGCCAAGACTGTGCCACTGCACTCCA  
GCCTG

>hsamiR1277\_5p

AAATATATATATATATGTACGTAT

>EnSpm-8\_HM

ATATATATATATATGTACGTATG

>EVI5

ATATATATATATATATATATATG

>hsamiR3673

ATGGAATGTATATACGGAATA

>DNA\_2\_12\_DR\_DNA\_transposon\_Danio\_rerio

ATATATATATGGAATGTATATACGGAATATACATATGGAATATATATATATACGGAATATACATATGGAATATATAT  
ATATACGGAATATATATATG

>ZNF571

ATATACATATGGAATATATATATGGAATACATATGTGGAATATATACATATATGGTATATGGAATATATACATATAT  
GGAATACATATATG

>hsamiR1277\_5p

AAATATATATATATATGTACGTAT

>EnSpm-8\_HM

ATATATATATATATGTACGTATG

>EVI5

ATATATATATATATGTACATATG

>hsamiR297

ATGTATGTGTGCATGTGCATG

>ERV1\_N6\_I\_DR\_ERV1\_Danio\_rerio

ACATATGTATGTATGTGTGCATG

>KLHL9

ACATATGTATGTATGTGTGCATG

>hsamiR1972

TCAGGCCAGGCACAGTGGCTCA

>AANU01178229.1\_7254x6952\_RF00100\_7SK



GTGGCTCATGCCTGTAATCCCAGCAATTTGGGAGGCTGAGGCAGGCGGATCACCTGAGGTCAGGAGTTCGAGAC  
CAGCCTGGCCAACATAGTCAAACCCTGTCTCTACTAAAAATACAAGAAATTAGCCAGATGTGGTGGCATGCACCTG  
TAATCCCAGCAATTCAGGAGGTTGAGGCAGGAGAAACACTTGAACCCGGGAGGCAGAGATTGC

>MEFV

AGGCCGGGCACAGTGGCTCATGCCTGTAATCCCAGCACTTTGGGAGGCTGAGGCGGGTGGATCACCTGAGGTCA  
GGAGTTCGAGACCAGCCTGGCTAACATGGTGAAACCCCGTCTCTACTAAAAATACAAGAAAACCAGCCTGGTGT  
GGTGGCACGCACCTGTAATCCCAGCTGCTCAGGAGGCTGAGGCAGGAGAATCGCTTGAACCTGGGAGGTGGAGG  
TTGCAGTGAGCTGAGATCGTGCCACTGCACTCCAGCCTGGGCCACAGAGCAAGATTTGGTCTCAAAAAAAAAAAAA  
AAAAAATCATAGTTCATTAATCCAGGTACACAAATACTTCTATCCCAATCCAGTCTGCTTGCCTTCTCTAGGCTTCC  
CATATCCTCAAGACAGAAGCAGAGAGAACAAGGGGACATATATCCTTGCCGTGGGGTCTGAGGGAAAATGAGG  
GCCAAATCTTCTGTTTCAGGAGCACCTGAGAGTGCCACCCACCAGGGGCGGATTATGCAACGACTCCGTACTTCTCT  
CTCTGAAATCCATG

>hsamiR1972

TCAGGCCAGGCACAGTGGCTCA

>AANU01178229.1\_7254x6952\_RF00100\_7SK

GTGGCTCATGCCTGTAATCCCAGCGATTTGGGAGGCTGAGGCAGGCGGACCACCTGAGGTCAGGAGTTCGAGAC  
CAGCCTGGCCAACATAGTCAAACCCTGTCTCTACTAAAAATACAAGAAATTAGCCAGATGTGGTGGCACGCAGCT  
GTAATCCCAGCAATTCAGGAGGTTGAGGCAGGAGAAACACTTGAACCCGGGAGGCAGAGATTGC

>MEFV

AGGCCGGGCACAGTGGCTCATGCCTGTAATCCCAGCACTTTGGGAGGCTGAGGCGGGTGGATCACCTGAGGTCA  
GGAGTTCGAGACCAGCCTGGCTAACATGGTGAAACCCCGTCTCTACTAAAAATACAAGAAAACCAGCCTGGTGT  
GGTGGCACGCACCTGTAATCCCAGCTGCTCAGGAGGCTGAGGCAGGAGAATCGCTTGAACCTGGGAGGTGGAGG  
TTGCAGTGAGCTGAGATCGTGCCACTGCACTCCAGCCTGGGCCACAGAGCAAGATTTGGTCTCAAAAAAAAAAAAA  
AAAAAATCATAGTTCATTAATCCAGGTACACAAATACTTCTATCCCAATCCAGTCTGCTTGCCTTCTCTAGGCTTCC  
CATATCCTCAAGACAGAAGCAGAGAGAACAAGGGGACATATATCCTTGCCGTGGGGTCTGAGGGAAAATGAGG  
GCCAAATCTTCTGTTTCAGGAGCACCTGAGAGTGCCACCCACCAGGGGCGGATTATGCAACGACTCCGTACTTCTCT  
CTCTGAAATCCATG

>hsamiR548m

CAAAGGTATTTGTGGTTTTTG

>MADE1

CAAAGGTATTTGTGG

>TMEM132D

CAAAGGTATTTGTGG

>hsamiR574\_5p

TGAGTGTGTGTGTGTGAGTGTGT

>hAT-N53\_DR

GTGTGAGTGTGTGTGTGTGAGTGTGTGT

>AR

AGTGTGTGTGTATGTGTGTGTGTGTGAGAGAGAGAGAGAGTGTGTGTGTGTGTTGGGGGGGAGAGAGAGAGAGA  
GCGTGTGTGTGTGTGTGTGTGTGTGTGTGTGTGTGTGTGTGTGTGTGTGTGTGTGTGTGTGTGTGTGTGTGT  
GCAAGTCAGGGAGAGTCTTCTGACTCTCACATGTGTGTTTCCCTGGCTTACAGACTCCACTTCTCCACTAGAAAAG  
AAACTGGTGTCAATATGGAAGCTATGGAGCAGAGAGAGAACAAGATATCCAAACTCTAAGTGATTCTTCTTTGAC

ATCAATACAATATTTGAGTCTGGCTTGGGAGAAGAATGAGAGGCTTACAACTGATGAAGAGAAGCATGTGATGTG  
AGAGAGCAATCAAGGAGTGTGGCTACAGTAAGGCTAGATGTAAGAGGGAAAGTCGGACTGTAGTCTCTCAGTGT  
GTTTGAAGAGAGGGGTTGGCTGGCTTCTTCTCCTGGAGAAGCAGAAATCTGGTCCTGTTTACTGAACTTCTGTGG

>hsamiR574\_5p

TGAGTGTGTGTGTGTGAGTGTGT

>hAT-N53\_DR

GTGTGAGTGTGTGTGTGTGAGTGTGTGT

>AR

GTGTGTGTGTGTGAGAGAGAGAGAGAGTGTGTGTGTGTGTTGGGGGGGGAGAGAGAGAGAGAGCGTGTGTGTGT  
GTGTGTGTGTGTGTGTGTGTGTGTTTAGACAGACTGGAGAAGGTGGGAAAGACAGGCCCCAGGCAAGTCAGGGA  
GAGTCCCTTCTGACTCTCACATGTGTGTTCCCTGGCTTACAGACTCCACTTCTCCACTAGAAAGAACTGGTGTCA  
ATATGGAAGCTATGGAGCAGAGAGAGAACAAGATATTCCAACTCTAAGTGATTCTTCTTTGACATCAATACAATA  
TTTGAGTCTGGCTTGGGAGAAGAATGAGAGGCTTACAACTGATGAAGAGAAGCATGTGATGTGAGAGAGCAATC  
AAGGAGTGTGGCTACAGTAAGGCTAGATGTAAGAGGGAAAGTCGGACTGTAGTCTCTCAGTGTGTTTGAAGAGA  
GGGGTTGGCTGGCTTCTTCTCCTGGAGAAGCAGAAATCTGGTCCTGTTTACTGAACTTCTGTGG

>hsamiR574\_5p

TGAGTGTGTGTGTGTGAGTGTGT

>hAT-N53\_DR

GTGTGAGTGTGTGTGTGTGAGTGTGTGT

>AR

GTGTGTGTGTGTGTGTGTGTGTGTGTTTAGACAGACTGGAGAAGGTGGGAAAGACAGGCCCCAGGCAAGTCA  
GGGAGAGTCCCTTCTGACTCTCACATGTGTGTTCCCTGGCTTACAGACTCCACTTCTCCACTAGAAAGAACTGGT  
GTCAATATGGAAGCTATGGAGCAGAGAGAGAACAAGATATTCCAACTCTAAGTGATTCTTCTTTGACATCAATAC  
AATATTTGAGTCTGGCTTGGGAGAAGAATGAGAGGCTTACAACTGATGAAGAGAAGCATGTGATGTGAGAGAGC  
AATCAAGGAGTGTGGCTACAGTAAGGCTAGATGTAAGAGGGAAAGTCGGACTGTAGTCTCTCAGTGTGTTTGA  
GAGAGGGGTTGGCTGGCTTCTTCTCCTGGAGAAGCAGAAATCTGGTCCTGTTTACTGAACTTCTGTGG

>hsamiR574\_5p

TGAGTGTGTGTGTGTGAGTGTGT

>hAT-N53\_DR

GTGTGAGTGTGTGTGTGTGAGTGTGTGT

>AR

GTGTGTGTGTGTGTGTGTGTGTGTGTTTAGACAGACTGGAGAAGGTGGGAAAGACAGGCCCCAGGCAAGT  
CAGGGAGAGTCCCTTCTGACTCTCACATGTGTGTTCCCTGGCTTACAGACTCCACTTCTCCACTAGAAAGAACTG  
GTGTCAATATGGAAGCTATGGAGCAGAGAGAGAACAAGATATTCCAACTCTAAGTGATTCTTCTTTGACATCAAT  
ACAATATTTGAGTCTGGCTTGGGAGAAGAATGAGAGGCTTACAACTGATGAAGAGAAGCATGTGATGTGAGAGA  
GCAATCAAGGAGTGTGGCTACAGTAAGGCTAGATGTAAGAGGGAAAGTCGGACTGTAGTCTCTCAGTGTGTTTGA  
AGAGAGGGGTTGGCTGGCTTCTTCTCCTGGAGAAGCAGAAATCTGGTCCTGTTTACTGAACTTCTGTGG

>hsamiR574\_5p

TGAGTGTGTGTGTGTGAGTGTGT

>hAT-N53\_DR

GTGTGAGTGTGTGTGTGTGAGTGTGTGT



>hsamiR574\_5p

TGAGTGTGTGTGTGTGAGTGTGT

>hAT-N53\_DR

GTGTGAGTGTGTGTGTGTGAGTGTGTGT

>AR

GTGTGTGTGTGTGTGTGTGTGTGTGTTTAGACAGACTGGAGAAGGTGGGAAAGACAGGCCCCAGGCAAGTCAGGGAG  
AGTCCTTCTGACTCTCACATGTGTGTTTCCCTGGCTTCACAGACTCCACTTCTCCACTAGAAAGAACTGGTGTCAA  
TATGGAAGCTATGGAGCAGAGAGAGAACAAGATATTCCAACTCTAAGTGATTCTTCTTTGACATCAATACAATAT  
TTGAGTCTGGCTTGGGAGAAGAATGAGAGGCTTACAAGTGAAGAGAAGCATGTGATGTGAGAGAGCAATCA  
AGGAGTGTGGCTACAGTAAGGCTAGATGTAAGAGGGAAAGTCGGACTGTAGTCTCTCAGTGTGTTTGAAGAGAG  
GGGTTGGCTGGCTTCTTCTCCTGGAGAAGCAGAAATCTGGTCCTTGTTTACTGAACTTCTGTGG

>hsamiR574\_5p

TGAGTGTGTGTGTGTGAGTGTGT

>hAT-N53\_DR

GTGTGAGTGTGTGTGTGTGAGTGTGTGT

>AR

GTGTGTGTGTGTGTGTGTGTGTGTGTTTAGACAGACTGGAGAAGGTGGGAAAGACAGGCCCCAGGCAAGTCAGGGA  
GAGTCCTTCTGACTCTCACATGTGTGTTTCCCTGGCTTCACAGACTCCACTTCTCCACTAGAAAGAACTGGTGTCA  
ATATGGAAGCTATGGAGCAGAGAGAGAACAAGATATTCCAACTCTAAGTGATTCTTCTTTGACATCAATACAATA  
TTTGAGTCTGGCTTGGGAGAAGAATGAGAGGCTTACAAGTGAAGAGAAGCATGTGATGTGAGAGAGCAATC  
AAGGAGTGTGGCTACAGTAAGGCTAGATGTAAGAGGGAAAGTCGGACTGTAGTCTCTCAGTGTGTTTGAAGAGA  
GGGTTGGCTGGCTTCTTCTCCTGGAGAAGCAGAAATCTGGTCCTTGTTTACTGAACTTCTGTGG

>hsamiR574\_5p

TGAGTGTGTGTGTGTGAGTGTGT

>hAT-N53\_DR

GTGTGAGTGTGTGTGTGTGAGTGTGTGT

>AR

GTGTGTGTGTGTGTGTGTGTGTGTGTTTAGACAGACTGGAGAAGGTGGGAAAGACAGGCCCCAGGCAAGTCAGG  
GAGAGTCTTCTGACTCTCACATGTGTGTTTCCCTGGCTTCACAGACTCCACTTCTCCACTAGAAAGAACTGGTGT  
CAATATGGAAGCTATGGAGCAGAGAGAGAACAAGATATTCCAACTCTAAGTGATTCTTCTTTGACATCAATACAA  
TATTTGAGTCTGGCTTGGGAGAAGAATGAGAGGCTTACAAGTGAAGAGAAGCATGTGATGTGAGAGAGCAA  
TCAAGGAGTGTGGCTACAGTAAGGCTAGATGTAAGAGGGAAAGTCGGACTGTAGTCTCTCAGTGTGTTTGAAGA  
GAGGGTTGGCTGGCTTCTTCTCCTGGAGAAGCAGAAATCTGGTCCTTGTTTACTGAACTTCTGTGG

>hsamiR1285\_5p

GATCTCACTTTGTTGCCAGG

>AluJ

CTCACTTTGTTGCCAGGCTGGTCTCAAACCTCCTGGTCTGG

>C9orf100

CTCACTGTGTTGCCAGGCTGGTCTTGAACCTCCTGGGCTGG

>hsamiR1285\_5p

GATCTCACTTTGTTGCCAGG

>AluJ

TCTCACTTTGTTGCCCAGGCTGG  
>FAM83E  
TCTCACTGTGTTGCCCAGGCTGG

>hsamiR1285\_5p  
GATCTCACTTTGTTGCCCAGG  
>AluJ  
TCTCACTTTGTTGCCCAGGCTGG  
>ECHDC1  
TCTCACTCTGTTGCCCAGGCTGG

>hsamiR1285\_5p  
GATCTCACTTTGTTGCCCAGG  
>AluJ  
TCTCACTTTGTTGCCCAGGCTGG  
>CD8B  
TCTCACTCTGTTGCCCAGGCTGG

>hsamiR1285\_5p  
GATCTCACTTTGTTGCCCAGG  
>AluJ  
TCTCACTTTGTTGCCCAGGCTGG  
>CA5B  
TCTCACTCTGTTGCCCAGGCTGG

>hsamiR708\_5p  
AAGGAGCTTACAATCTAGCTGGG  
>L2\_Plaf1r  
CTGCCCTCAAGGAGCTTACAATCTAGCTGG  
>WDYHV1  
CTGCCCTCAAGGAACTTACAATGTAGCTGG

>hsamiR1285\_5p  
GATCTCACTTTGTTGCCCAGG  
>AluJ  
TTTGTAGAGATAGGATCTCACTTTGTTGCCCAGGCTGGTCTCAAACCTCCTGG  
>ZFP42  
TTTGTAGAGACAGGATCTCACTATGTTGCCCAGGCTGGTCTGGAACCTCCTGG

>hsamiR1285\_5p  
GATCTCACTTTGTTGCCCAGG  
>AluJ  
CCTCAGCCTCCCAAGTAGTTGGGACTACAGGCATATGCCACCACACCCAGCTAATTTTTTTATTATTTGTAGAGATA  
GGATCTCACTTTGTTGCCCAGGCTGGTCTCAAACCTCCTGG  
>FAM83E  
CCTCAGCCTCCTGCGTAGCTGGGACCACAGGCGTGCGCCACCACACCCAATAATTTGTTTTTTAATTGTAGAGAT  
GGGGTCTCACTATGTTGCCCAGGCTGGTCTCAAACCTCCTGG

>hsamiR1285\_5p

GATCTCACTTTGTTGCCCAGG

>AluJ

ATCATAGCTCAGTGCAGCTGCAAACCTCCTAGGCTCAGGCAGTCCTCCTGCCTCAGCCTCCCAAGTAGTTGGGACTA  
CAGGCATATGCCACCACACCCAGCTAATTTTTTTATTATTTGTAGAGATAGGATCTCACTTTGTTGCCCAGGCTGGT  
CTCAAACCTCTGG

>CYP27C1

ATCACAGCTCACTGCAGCCTCAACCTCCAGACTTAAGCAATCCTCCAGCCTCAGCCTCCCAAATAGCTAGGACTAC  
AGGCATGCACCACCACACTCAGCTAAGTTTTTTGATTTTTAGTAGACAGGATCTCACTGTGTTGCCCAAGCTTGCTCT  
CAAACCTCTGG

>hsamiR1285\_3p

TCTGGGCAACAAAGTGAGACCT

>AluJb

GAGACCAATCTGGGCAACAAAGTGAGACCTCCGTCTCTACAAAGAATACAAAAATTAGCTGGG

>GRM6

GAGACCAGCCTGGGCAACATAGTGAGACCTCGTCTCTACAAAAATAAAACATTAGCTGGG

>hsamiR3676\_5p

AGGAGATCCTGGGTT

>tRNA-Thr-ACY\_

ACAGGAGATCCTGGG

>DDX19B

ACAGGAGATCCTGGG

>hsamiR1273d

GAACCCATGAGGTTGAGGCTGCAGT

>AluSq

GAGGTTGAGGCTGCAGTGAGCCAAGATCGTGCCACTGCACTTCAGCCTGGG

>ENTPD1

GAGGTCGAGGCTGCAGTGAGCCATGATCATGCCACTGCATTCCAGCCTGGG

>hsamiR708\_5p

AAGGAGCTTACAATCTAGCTGGG

>L2\_Plal1r

CCTCAAGGAGCTTACAATCTAGCTGGGG

>NNAT

CCTCCAGGAGCTTACAATCTAGCTGGGG

>hsamiR1202

GTGCCAGCTGCAGTGGGGGAG

>MER52A

CCAGCTGCAGTGGGGG

>LFNG

CCAGCTGCAGTGGGGG

>hsamiR548i

AAAAGTAATTGCGGATTTTGCC

>MADE1  
TTGGTGCAAAAGTAATTGCGG  
>SRSF12  
TTGGCGCAAAAGTAATTGCGG

>hsamiR548i  
AAAAGTAATTGCGGATTTTGCC  
>MADE1  
TAGGTTGGTGCAAAAGTAATTGCGG  
>SRSF12  
TAGGTTGGCGCAAAAGTAATTGCGG

>hsamiR548i  
AAAAGTAATTGCGGATTTTGCC  
>MADE1  
TAGGTTTGCAAAAGTAATTGCGG  
>SRSF12  
TAGGTTGGCGCAAAAGTAATTGCGG

>hsamiR1268a  
CGGGCGTGGTGGTGGGGG  
>AluYc2\_Repetitive\_sequence\_Homo\_sapiens  
AAAAGTTAGCCGGGCGTGGTGGTGGGGCCTGTGGTCCCAGCTACTTTGGAGGCTGAGG  
>ADAMTS4  
AAAATTAGCCGGGCGTGGTGGTAGGTGCCTATAATCTCAGCTACTCGGGAGGCTGAGG

>hsamiR1972  
TCAGGCCAGGCACAGTGGCTCA  
>AANU01178229.1\_7254x6952\_RF00100\_7SK  
AGGCCAGGCACAGTGGCTCATGCCTGTAATCCCAGCAATTTGGGAGGCTGAGGCAGGCCGGATCACCTGAGGTCA  
GGAGTTGAGACCAGCCTGGCCAACATAGTGAAACCTGTCTCTACTAAAAATACAAGAAATTAGCCAGATGTGG  
TGGCATGCACCTGTAATCCCAGCAATTCAGGAGGTTGAGGCAGGAGAAACACTTGAACCCGGGAGG  
>S1PR2  
AGGCCGGGCACAGTGGCTCACGCCTGTAATCCCAGCAATTTGGGAGGCCGAGGCCGGGCGGATCACTTGAGGTCA  
GGAGTTTGGAGACCAGCCTGGCCAACGTAGTGAAACCTGTCTCTACTAAAAATACAAAAATTAGCCAGACATGGT  
GGCAGGTGCCTGTAGTCCCAGCTACTCGAGAGGCTGAAGCAGGAGAATCGCTTGAACCCGGGAGG

>hsamiR1972  
TCAGGCCAGGCACAGTGGCTCA  
>AANU01178229.1\_7254x6952\_RF00100\_7SK  
AGGCCAGGCACAGTGGCTCATGCCTGTAATCCCAGCGATTTGGGAGGCTGAGGCAGGCCGGACCACCTGAGGTCA  
GGAGTTGAGACCAGCCTGGCCAACATAGTGAAACCTGTCTCTACTAAAAATACAAGAAATTAGCCAGATGTGG  
TGGCACGCAGCTGTAATCCCAGCAATTCAGGAGGTTGAGGCAGGAGAAACACTTGAACCCGGGAGG  
>S1PR2  
AGGCCGGGCACAGTGGCTCACGCCTGTAATCCCAGCAATTTGGGAGGCCGAGGCCGGGCGGATCACTTGAGGTCA  
GGAGTTTGGAGACCAGCCTGGCCAACGTAGTGAAACCTGTCTCTACTAAAAATACAAAAATTAGCCAGACATGGT  
GGCAGGTGCCTGTAGTCCCAGCTACTCGAGAGGCTGAAGCAGGAGAATCGCTTGAACCCGGGAGG

>hsamiR1268a  
CGGGCGTGGTGGTGGGGG  
>AluYc2\_Repetitive\_sequence\_Homo\_sapiens  
TAAAAAAGAAAAATTAGTCCAGCGTGGTGGTGGGTGCCTGTGGTCCCAGCTACTTGGGAGGCTGAGGTGGGAG  
GATTGCTGGAGCCCAGG  
>ADAMTS4  
TAAAATACAAAAATTAGCCGGGCGTGGTGGTAGGTGCCTATAATCTCAGCTACTCGGGAGGCTGAGGCAGGAG  
AATTGCTGGAACCCAGG

>hsamiR1285\_5p  
GATCTCACTTTGTTGCCCAGG  
>AluJ  
AGTCTCACTCTTTTGCCCAGGCTGGAGTGCAGCGGCACCATCATAGCTCAGTGCAGCTGCAAACCTCTAGGCTCAG  
GCAGTCCTCCTGCCTCAGCCTCCCAAGTAGTTGGGACTACAGG  
>CD8B  
AGTCTCACTCTGTTGCCCAGGCTGGAGTGCAGTGGTACCATCATAGCTCACTGCAGCCTTGAACCTCTGGGCTCAA  
GTGATCCTCCTGCTCAGCCTCCCAGTAGCTGTGACTACAGG

>hsamiR548a\_5p  
AAAAGTAATTGCGAGTTTTACC  
>MADE1  
GGTGCAAAAGTAATTGCG  
>KATNAL1  
GGTGCAAAAGTAATTGCG

>hsamiR548a\_5p  
AAAAGTAATTGCGAGTTTTACC  
>MADE1  
GGTGCAAAAGTAATTGCG  
>HLA-DMB  
GGTGCAAAAGTAATTGCG

>hsamiR762  
GGGGCTGGGGCCGGGGCCGAGC  
>NonLTR\_5\_CR\_Non\_LTR\_Retrotransposon\_Chlamydomonas\_reinhardtii  
GGCTGGGGCCGGGGCCG  
>FURIN  
GGCTGGGGCCGGGGCCG

>hsamiR762  
GGGGCTGGGGCCGGGGCCGAGC  
>NonLTR\_5\_CR\_Non\_LTR\_Retrotransposon\_Chlamydomonas\_reinhardtii  
GGGCTGGGGCCGGGGCCG  
>STARD8  
GGGCTGGGGCCGGGGCCG

>hsamiR566  
GGGCGCCTGTGATCCCAAC



>GarnAlu1

AAAAATAAGCTGGGTGTGGTGGCTGACGCCTGTAATCCCAGCTAGTCAGGAGGCTGAGACAGGAGAATCGCTTG  
AACCCAGCAGATGGAGGTTGCAGTGAGCCG

>DENR

AAAAATTAGCTGGGCGTGGTGGCGGGCGCCTGTAATCCCACCTACTTGGGAGGCTGAGGCAGGAGAATCACTTG  
AACCCGGGAGGCGGAGGTTGCAGTGAGCCG

>hsamiR566

GGGCGCCTGTGATCCCAAC

>GarnAlu1

GGTGTGGTGGCTGACGCCTGTAATCCCAGCTAGTCAGGAGGCTGAGACAGGAGAATCGCTTGAACCCAGCAGAT  
GGAGGTTGCAGTGAGCCG

>CCDC113

GGTGTGGTGGTGGGCGCCTGTAATCCCAGCTACTGGGAGGCTGAGGTAGGAGAATCGCTTGAACCCAGGAGGA  
GGAGGTTGCAGCGAGCCG

>hsamiR1255a

AGGATGAGCAAAGAAAGTAGATT

>TIGGER1

GTTGCTTCTCAAGGATGAGCAAAGAAAGTAG

>PYROXD1

GTTGTTTCTCATGGATGAGCAAAGAACGTAG

>hsamiR708\_5p

AAGGAGCTTACAATCTAGCTGGG

>L2\_Plaf1r

CTGCCCTCAAGGAGCTTACAATCTAG

>GRIA4

CTGCCCTCAAGGAGCTTACAGTCTAG

>hsamir151a\_5p

TCGAGGAGCTCACAGTCTAGT

>L2\_Plaf1o/MdoRep1\_SINE\_Metatheria

CCTGCCCTCGAGGAGCTCACAGTCTAG

>MBD2

CCTGCCCTCATGGAGCTCACAGTCTAG

>hsamir151a\_5p

TCGAGGAGCTCACAGTCTAGT

>L2\_Plaf1o/MdoRep1\_SINE\_Metatheria

CCTGCCCTCGAGGAGCTCACAGTCTAG

>N4BP1

CCTGCCACGAGGAGCTCACAGTCTAG

>hsamiR708\_5p

AAGGAGCTTACAATCTAGCTGGG

>L2\_Plaf1r

CTGCCCTCAAGGAGCTTACAATCTAG

>GTF3C4  
CTGCCCTTGAGGAGCTTACAATCTAG

>hsamiR708\_5p  
AAGGAGCTTACAATCTAGCTGGG  
>L2\_Plat1r  
TGCCCTCAAGGAGCTTACAATCTAG  
>KPNA4  
TGCCCTTAAGGAGCTTACAATCTAG

>hsamiR708\_5p  
AAGGAGCTTACAATCTAGCTGGG  
>L2\_Plat1r  
CTGCCCTCAAGGAGCTTACAATCTAG  
>SON  
CTGCTCTCAAGGAGCTTACAATCTAG

>hsamiR708\_5p  
AAGGAGCTTACAATCTAGCTGGG  
>L2\_Plat1r  
CTGCCCTCAAGGAGCTTACAATCTAG  
>DLC1  
CTGCCCTCAAAGGAGCTTACAATCTAG

>hsamiR574\_5p  
TGAGTGTGTGTGTGTGAGTGTGT  
>hAT-N53\_DR  
GTGTGAGTGTGTGTGTGTGAG  
>AL020996.1  
GTGTGTGTGTGTGTGTGTGAG

>hsamiR574\_5p  
TGAGTGTGTGTGTGTGAGTGTGT  
>hAT-N53\_DR  
GTGTGAGTGTGTGTGTGTGAG  
>BTBD9  
GTGTGTGTGTGTGTGTGTGAG

>hsamiR574\_5p  
TGAGTGTGTGTGTGTGAGTGTGT  
>hAT-N53\_DR  
GTGTGAGTGTGTGTGTGTGAGTGTGTG  
>AL020996.1  
GTGTGTGTGTGTGTGTGTGTGTGTGAG

>hsamiR574\_5p  
TGAGTGTGTGTGTGTGAGTGTGT  
>hAT-N53\_DR

GTGTGAGTGTGTGTGTGTGAGTGTGTG  
>BTBD9  
GTGTGTGTGTGTGTGTGTGTGTGTGTGAG

>hsamiR574\_5p  
TGAGTGTGTGTGTGTGAGTGTGT  
>hAT-N53\_DR  
GTGTGAGTGTGTGTGTGTGAGTGTGTGT  
>AL020996.1  
GTGTGTGTGTGTGTGTGTGTGTGTGTGAG

>hsamiR574\_5p  
TGAGTGTGTGTGTGTGAGTGTGT  
>hAT-N53\_DR  
GTGTGAGTGTGTGTGTGTGAGTGTGTGT  
>BTBD9  
GTGTGTGTGTGTGTGTGTGTGTGTGTGAG

>hsamiR574\_5p  
TGAGTGTGTGTGTGTGAGTGTGT  
>hAT-N53\_DR  
GTGTGAGTGTGTGTGTGTGAGTGTGTGT  
>AL020996.1  
GTGTGTGTGTGTGTGTGTGTGTGTGTGAG

>hsamiR574\_5p  
TGAGTGTGTGTGTGTGAGTGTGT  
>hAT-N53\_DR  
GTGTGAGTGTGTGTGTGTGAGTGTGTGT  
>BTBD9  
GTGTGTGTGTGTGTGTGTGTGTGTGTGAG

>hsamiR574\_5p  
TGAGTGTGTGTGTGTGAGTGTGT  
>hAT-N53\_DR  
GTGTGAGTGTGTGTGTGTGAGTGTGTGT  
>AL020996.1  
GTGTGTGTGTGTGTGTGTGTGTGTGTGAG

>hsamiR574\_5p  
TGAGTGTGTGTGTGTGAGTGTGT  
>hAT-N53\_DR  
GTGTGAGTGTGTGTGTGTGAGTGTGTGT  
>BTBD9  
GTGTGTGTGTGTGTGTGTGTGTGTGTGAG

>hsamiR574\_5p  
TGAGTGTGTGTGTGTGAGTGTGT

>hAT-N53\_DR  
GTGTGAGTGTGTGTGTGTGAGTGTGTGT  
>AL020996.1  
GTGTGTGTGTGTGTGTGTGTGTGTGTGTGTGTGTGAG

>hsamiR574\_5p  
TGAGTGTGTGTGTGTGAGTGTGT  
>hAT-N53\_DR  
GTGTGAGTGTGTGTGTGTGAGTGTGTGT  
>BTBD9  
GTGTGTGTGTGTGTGTGTGTGTGTGTGTGTGTGTGAG

>hsamiR574\_5p  
TGAGTGTGTGTGTGTGAGTGTGT  
>hAT-N53\_DR  
GTGTGAGTGTGTGTGTGTGAGTGTGTGT  
>AL020996.1  
GTGTGTGTGTGTGTGTGTGTGTGTGTGTGTGTGTGAG

>hsamiR574\_5p  
TGAGTGTGTGTGTGTGAGTGTGT  
>hAT-N53\_DR  
GTGTGAGTGTGTGTGTGTGAGTGTGTGT  
>BTBD9  
GTGTGTGTGTGTGTGTGTGTGTGTGTGTGTGTGTGAG

>hsamiR574\_5p  
TGAGTGTGTGTGTGTGAGTGTGT  
>hAT-N53\_DR  
GTGTGAGTGTGTGTGTGTGAGTGTGTGT  
>AL020996.1  
GTGTGTGTGTGTGTGTGTGTGTGTGTGTGTGTGTGAG

>hsamiR574\_5p  
TGAGTGTGTGTGTGTGAGTGTGT  
>hAT-N53\_DR  
GTGTGAGTGTGTGTGTGTGAGTGTGTGT  
>BTBD9  
GTGTGTGTGTGTGTGTGTGTGTGTGTGTGTGTGTGAG

>hsamiR1268a  
CGGGCGTGGTGGTGGGGG  
>AluYc2\_Repetitive\_sequence\_Homo\_sapiens  
AAAAGTTAGCCGGGCGTGGTGGTGGGGCCTGTGGTCCCAGCTACTTTGGAGGCTGAGGTGGAAGGATCACCTG  
AGCCCAGGAGGTGGAGGCTGCAGTAAGCTTAGATTGCAGCACTGCGGTCCAGCCTGGGTGACAGAGTGAG  
>RBM7  
AAAAATTAGCCAGGCGTGGTGGTGGTGCCTGTAATTCCAGCTACTCGGGAGGCTGAGGTGAGAGAATCACTGG  
AACCAGGAGGCGGAGGTAGCAGTGAGCTGAGATTGTGCCACTCTACTCCAGCCTGGGTGACAGAGTGAG

>hsamiR1304\_5p  
TTTGAGGCTACAGTGAGATGTG  
>ALU\_SINE1\_7SL\_Primates  
CACTTGAGCCCAGCGGTTTGAGGCTACAGTGAG  
>DPY30  
CACTTGAGCCCAGGAGGTGCGAGGCTACAGTGAG

>hsamiR340\_5p  
TTATAAAGCAATGAGACTGATT  
>MARNA  
TTATAAAGCAATGAG  
>ZNF514  
TTATAAAGCAATGAG

>hsamiR1246  
AATGGATTTTTGGAGCAGG  
>MLT1M  
GAATGGATTTTTGGAG  
>LZTFL1  
GAATGGATTTTTGGAG

>hsamiR3934  
TCAGGTGTGGAACTGAGGCAG  
>MIR  
GGAAACTGAGGCAGGAG  
>TMEM170A  
GGAAACTGAGGCAGGAG

>hsamiR1268a  
CGGGCGTGGTGGTGGGGG  
>AluYc2\_Repetitive\_sequence\_Homo\_sapiens  
AAAAATTAGTCCAGCGTGGTGGTGGTGGTGCCTGTGGTCCCAGCTACTTGGGAGGCTGAGGTGGGAGGATTGCTGG  
AGCCCAGGAG  
>RBM7  
AAAAATTAGCCAGGCGTGGTGGTGGTGGTGCCTGTAATTCCAGCTACTCGGGAGGCTGAGGTGAGAGAATCACTGG  
AACCCAGGAG

>hsamiR1268a  
CGGGCGTGGTGGTGGGGG  
>AluYc2\_Repetitive\_sequence\_Homo\_sapiens  
AAAAGTTAGCCGGGCGTGGTGGTGGGGCCTGTGGTCCCAGCTACTTTGGAGGCTGAGGTGGAAGGATCACCTG  
AGCCCAGGAGGTGGAGGCTGCAGTAAGCTTAGATTGCAGCACTGCGGTCCAGCCTGGGTGACAGAG  
>PNMA2  
AAAAATTAGCTGGGCGTGGTGGTGGTGGTGCCTGTAATCCCAGCTACTCGGGAGGCTGAGGCACGAAATCGCTTGA  
ACCTGGGAGGCGGAGGTTGCAGTGAGCTGAGATTGCACCACTGCACTCCAGCCTGGGTGATAGAG

>hsamiR1972  
TCAGGCCAGGCACAGTGGCTCA

>AANU01178229.1\_7254x6952\_RF00100\_7SK

TTCAGGCCAGGCACAGTGGCTCATGCCTGTAATCCCAGCAATTTGGGAGGCTGAGGCAGGCGGATCACCTGAGGT  
CAGGAGTTCGAGACCAGCCTGGCCAACATAGTGAAACCCCTGTCTCTACTAAAAATACAAGAAATTAGCCAGATGT  
GGTGGCATGCACCTGTAATCCCAGCAATTCAGGAGGTTGAGGCAGGAGAAACACTTGAACCCGGGAGGCAGAGA  
TTGCAGTGAGGTGAGATTGTGCTACTGCACTCCAGCCTGGGCAACAGAG

>NOL9

TTCAGGCCAGGCGCAGTGGCTCACGCCTGTAATCCCAGCACTTTCGGAGGCCAAGGCGGGCGGATCACGAGGTC  
AGGAGTTCGAGACCAGCCTGACCAACATGGTGAAACCCCTGTCTCTACTAAAAATACAAAAATTAGCTGGGCGTGG  
TGGCATA CGCCTGTAATCCCAGCTACTCAGGAGGCTGAGGCAGGAGAATCGCTTAAACCTGGGAGGCGGAAGTT  
GCAGTGAGCCGAGATCACTCCACTGCACCCCAGCCTGGGCGACAGAG

>hsamiR1972

TCAGGCCAGGCACAGTGGCTCA

>AANU01178229.1\_7254x6952\_RF00100\_7SK

AGGCCAGGCACAGTGGCTCATGCCTGTAATCCCAGCAATTTGGGAGGCTGAGGCAGGCGGATCACCTGAGGTCA  
GGAGTTCGAGACCAGCCTGGCCAACATAGTGAAACCCCTGTCTCTACTAAAAATACAAGAAATTAGCCAGATGTGG  
TGGCATGCACCTGTAATCCCAGCAATTCAGGAGGTTGAGGCAGGAGAAACACTTGAACCCGGGAGGCAGAGATT  
GCAGTGAGGTGAGATTGTGCTACTGCACTCCAGCCTGGGCAACAGAG

>MEFV

AGGCCGGGCACAGTGGCTCATGCCTGTAATCCCAGCACTTTGGGAGGCTGAGGCGGGTGGATCACCTGAGGTCA  
GGAGTTCGAGACCAGCCTGGCTAACATGGTGAAACCCCGTCTCTACTAAAAATACAAGAAAACCAGCCTGGTGT  
GGTGGCACGCACCTGTAATCCCAGCTGCTCAGGAGGCTGAGGCAGGAGAATCGCTTGAACCTGGGAGGTGGAGG  
TTGCAGTGAGCTGAGATCGTGCCACTGCACTCCAGCCTGGGCCACAGAG

>hsamiR1972

TCAGGCCAGGCACAGTGGCTCA

>AANU01178229.1\_7254x6952\_RF00100\_7SK

AGGCCAGGCACAGTGGCTCATGCCTGTAATCCCAGCGATTTGGGAGGCTGAGGCAGGCGGACCACCTGAGGTCA  
GGAGTTCGAGACCAGCCTGGCCAACATAGTGAAACCCCTGTCTCTACTAAAAATACAAGAAATTAGCCAGATGTGG  
TGGCACGCAGCTGTAATCCCAGCAATTCAGGAGGTTGAGGCAGGAGAAACACTTGAACCCGGGAGGCAGAGATT  
GCAGTGAGGTGAGATTGTGCTACTGCACTCCAGCCTGGGCAACAGAG

>MEFV

AGGCCGGGCACAGTGGCTCATGCCTGTAATCCCAGCACTTTGGGAGGCTGAGGCGGGTGGATCACCTGAGGTCA  
GGAGTTCGAGACCAGCCTGGCTAACATGGTGAAACCCCGTCTCTACTAAAAATACAAGAAAACCAGCCTGGTGT  
GGTGGCACGCACCTGTAATCCCAGCTGCTCAGGAGGCTGAGGCAGGAGAATCGCTTGAACCTGGGAGGTGGAGG  
TTGCAGTGAGCTGAGATCGTGCCACTGCACTCCAGCCTGGGCCACAGAG

>hsamiR1972

TCAGGCCAGGCACAGTGGCTCA

>AANU01178229.1\_7254x6952\_RF00100\_7SK

AGGCCAGGCACAGTGGCTCATGCCTGTAATCCCAGCAATTTGGGAGGCTGAGGCAGGCGGATCACCTGAGGTCA  
GGAGTTCGAGACCAGCCTGGCCAACATAGTGAAACCCCTGTCTCTACTAAAAATACAAGAAATTAGCCAGATGTGG  
TGGCATGCACCTGTAATCCCAGCAATTCAGGAGGTTGAGGCAGGAGAAACACTTGAACCCGGGAGGCAGAGATT  
GCAGTGAGGTGAGATTGTGCTACTGCACTCCAGCCTGGGCAACAGAG

>ZNF805

AGGCCAGGCACAGTGGCTCACACCTGTAATCCCAGCACTTCGGGAGGCCGAGGCAGGTGGATCACCAGATCAGG  
AAATCGAGACCATCCTGGCTAACACAGTGAAACCCCGTCTCTACTAAAAATACAAAAATTAGCCGGGCATGGTG

GCGGGCACCTGTAGTCCCAGCTACTCGGGAGGCTGAGGCAGGAGAATGGCATGAACCCGGGAGGCAGAGCTTG  
CAGTGAGCAGAGATCGCGCCACTGCACTCCAGCCTGGGCAACAGAG

>hsamiR1972

TCAGGCCAGGCACAGTGGCTCA

>AANU01178229.1\_7254x6952\_RF00100\_7SK

AGGCCAGGCACAGTGGCTCATGCCTGTAATCCCAGCGATTTGGGAGGCTGAGGCAGGCGGACCACCTGAGGTCA  
GGAGTTCGAGACCAGCCTGGCCAACATAGTGAAACCCTGTCTCTACTAAAAATACAAGAAATTAGCCAGATGTGG  
TGGCACGCAGCTGTAATCCCAGCAATTCAGGAGGTTGAGGCAGGAGAAACACTTGAACCCGGGAGGCAGAGATT  
GCAGTGAGGTGAGATTGTGCTACTGCACTCCAGCCTGGGCAACAGAG

>ZNF805

AGGCCAGGCACAGTGGCTCACACCTGTAATCCCAGCACTTCGGGAGGCCGAGGCAGGTGGATCACCAGATCAGG  
AAATCGAGACCATCCTGGCTAACACAGTGAACCCCGTCTCTACTAAAAATACAAAAAATTAGCCGGGCATGGTG  
GCGGGCACCTGTAGTCCCAGCTACTCGGGAGGCTGAGGCAGGAGAATGGCATGAACCCGGGAGGCAGAGCTTG  
CAGTGAGCAGAGATCGCGCCACTGCACTCCAGCCTGGGCAACAGAG

>hsamiR1273d

GAACCCATGAGGTTGAGGCTGCAGT

>AluSq

CCTGTAATCCCAGCTACTCGGTAGGCTGAGGTAGGAGAATCGCTTGAACCCATGAGGTTGAGGCTGCAGTGAGCC  
AAGATCGTGCCACTGCACTTCAGCCTGGGTGACAAGAG

>TAF8

CCTGTAATCCCAGCTACTCAGGAGGCTGAGGCAGGAGAATCCCTTGAACCCAGGAGGTGGAGGTTGCAGTGAGC  
CGAGATCACGCCATTGCACTCCAGCCTGGGCGATAAGAG

>hsamir601

TGGTCTAGGATTGTTGGAGGAG

>LTR96\_MD

ATTGTTGGAGGAGTCAG

>RUNX1T1

ATTGTTGGAGGAGTCAG

>hsamiR1285\_5p

GATCTCACTTTGTTGCCCAGG

>AluJ

TTTTCTTTTCTTTCTTTTTTTTTTTTTCTTGGGACACAGTCTCACTCTTTTGCCAGGCTGGAGTGAG

>CA5B

TTTTCTTTTCTTTCTTTTTTTTTTTTTATTAGACACAGAGTCTCACTCTGTTGCCAGGCTGGAGTGAG

>hsamiR1304\_3p

TCTCACTGTAGCCTCGAACCCC

>ALU\_SINE1\_7SL\_Primates

CACATCTCACTGTAGCCTCGAACCCCTGGGCTCAAG

>ZFP42

CACAGCTCACTGTAGCCTCAAACCTCTGGGCTCAAG

>hsamiR548x\_3p

TAAAACTGCAATTACTTTC

>MADE1  
AAAAACTGCAATTACTTTACACCAATCTTAATATTTTC  
>HLA-DMB  
AAAAACTGCAATTACTTTTGCACCAACCTAAATATTTTC

>hsamiR376a\_3p  
ATCATAGAGGAAAATCCACGT  
>CER15\_I\_CE\_LTR\_Retrotransposon\_Caenorhabditis\_elegans  
AGGAAAATCCACGTTTTTC  
>CDR1  
AGGAAAATCCACGTCTTC

>hsamiR1304\_3p  
TCTCACTGTAGCCTCGAACCCC  
>ALU\_SINE1\_7SL\_Primates  
CTCACTGTAGCCTCGAACCCCTGGGCTCAAGTGATTC  
>C11orf54  
CTCACTGTAGCCTCCAACCTTCTGGGCTCAAGTGATTC

>hsamiR1304\_3p  
TCTCACTGTAGCCTCGAACCCC  
>ALU\_SINE1\_7SL\_Primates  
CTCACTGTAGCCTCGAACCCCTGGGCTCAAGTGATTC  
>ERN2  
CTCACTGCAGCCTCGAACTCCTGGGCTCAAGTGATTC

>hsamiR548n  
CAAAAGTAATTGTGGATTTTGT  
>MADE1  
TAGGTTGGTGCAAAAGTAATTGTGGATTTTGTGTC  
>MTMR6  
TAGGTTGGTGCAAAAGTAATTGCGGTTTTTGTGTC

>hsamiR548l  
AAAAGTATTTGCGGGTTTTGTC  
>MADE1  
GTATTAGGTTGGTGCAAAAGTATTTGCGGGTTTTGTC  
>MTMR6  
GTATTAGGTTGGTGCAAAAGTAATTGCGGTTTTTGTGTC

>hsamiR574\_5p  
TGAGTGTGTGTGTGTGAGTGTGT  
>hAT-N53\_DR  
GTGTGAGTGTGTGTGTGTGAGTGTGTGTC  
>ARHGEF9  
GTGTGTGTGTGTGTGTGTGTGTGTGTGTC

>hsamiR574\_5p



TGAGTGTGTGTGTGTGAGTGTGT  
>hAT-N53\_DR  
GTGTGAGTGTGTGTGTGTGAGTGTGTGTC  
>NMNAT2  
GTGTGTGTGTGTGTGTGTGTGTGTGTGTC

>hsamiR574\_5p  
TGAGTGTGTGTGTGTGAGTGTGT  
>hAT-N53\_DR  
GTGTGAGTGTGTGTGTGTGAGTGTGTGTC  
>RALGAPB  
GTGTGTGTGTGTGTGTGTGTGTGTGTGTC

>hsamiR574\_5p  
TGAGTGTGTGTGTGTGAGTGTGT  
>hAT-N53\_DR  
GTGTGAGTGTGTGTGTGTGAGTGTGTGTC  
>CYLC2  
GTGTGTGTGTGTGTGTGTGTGTGTGTGTC

>hsamiR574\_5p  
TGAGTGTGTGTGTGTGAGTGTGT  
>hAT-N53\_DR  
GTGTGAGTGTGTGTGTGTGAGTGTGTGTC  
>CREB3L2  
GTGTGTGTGTGTGTGTGTGTGTGTGTGTC

>hsamiR574\_5p  
TGAGTGTGTGTGTGTGAGTGTGT  
>hAT-N53\_DR  
GTGTGAGTGTGTGTGTGTGAGTGTGTGTC  
>PPP2R1B  
GTGTGTGTGTGTGTGTGTGTGTGTGTGTC

>hsamiR574\_5p  
TGAGTGTGTGTGTGTGAGTGTGT  
>hAT-N53\_DR  
GTGTGAGTGTGTGTGTGTGAGTGTGTGTC  
>IGF1  
GTGTGTGTGTGTGTGTGTGTGTGTGTGTC

>hsamiR574\_5p  
TGAGTGTGTGTGTGTGAGTGTGT  
>hAT-N53\_DR  
GTGTGAGTGTGTGTGTGTGAGTGTGTGTC  
>KATNAL1  
GTGTGTGTGTGTGTGTGTGTGTGTGTGTC

>hsamiR574\_5p  
TGAGTGTGTGTGTGTGAGTGTGT  
>hAT-N53\_DR  
GTGTGAGTGTGTGTGTGTGAGTGTGTGTC  
>CHRDL1  
GTGTGTGTGTGTGTGTGTGTGTGTGTGTC

>hsamiR3200\_3p  
CACCTTGCGCTACTCAGGTCTG  
>LTR16D2  
CTACTCAGGTCTGCTC  
>SEC16A  
CTACTCAGGTCTGCTC

>hsamiR3150a\_3p  
CTGGGGAGATCCTCGAGGTTGG  
>GRANDE1\_ZD\_I  
GCTGGGGAGATCCTC  
>PDE1B  
GCTGGGGAGATCCTC

>hsamiR1972  
TCAGGCCAGGCACAGTGGCTCA  
>AANU01178229.1\_7254x6952\_RF00100\_7SK  
AGGCCAGGCACAGTGGCTCATGCCTGTAATCCCAGCGATTTGGGAGGCTGAGGCAGGCCGGACCACCTGAGGTCA  
GGAGTTCGAGACCAGCCTGGCCAACATAGTGAAACCCTGTCTCTACTAAAAATACAAGAAATTAGCCAGATGTGG  
TGGCACGCAGCTGTAATCCCAGCAATTCAGGAGGTTGAGGCAGGAGAAACACTTGAACCCGGGAGGCAGAGATT  
GCAGTGAGGTGAGATTGTGCTACTGCACTCCAGCCTGGGCAACAGAGTGAGACTC  
>WNK4  
AGGCCAGGCACGGTGGCTCACACCTGTAATCCCAGCACTTTGGGAGGCCGAGGAGGGCGGATCACGAGGTCAGG  
AGATCGAGACCAGCCTGGCTAACACGGTGAAACCCTGTCTCTACTAAAAATACAAAAAAATTAGCCGGGTGTGG  
TGGCGAGCGCCTGTAGTCCCAGCTACTCGGGAGGCTGGGACAGGAGAATGGCGTGAACCCGGGAGGCCGAGCT  
TGCAGTGAGCCGAGATCGTGCCACTGCACTCCAGCCTGGGCGACAGAGTGAGACTC

>hsamiR1972  
TCAGGCCAGGCACAGTGGCTCA  
>AANU01178229.1\_7254x6952\_RF00100\_7SK  
AGGCCAGGCACAGTGGCTCATGCCTGTAATCCCAGCGATTTGGGAGGCTGAGGCAGGCCGGACCACCTGAGGTCA  
GGAGTTCGAGACCAGCCTGGCCAACATAGTGAAACCCTGTCTCTACTAAAAATACAAGAAATTAGCCAGATGTGG  
TGGCACGCAGCTGTAATCCCAGCAATTCAGGAGGTTGAGGCAGGAGAAACACTTGAACCCGGGAGGCAGAGATT  
GCAGTGAGGTGAGATTGTGCTACTGCACTCCAGCCTGGGCAACAGAGTGAGACTC  
>HCR1  
AGGCCAGGCACGGTGGCTCACGCCTGTGATCCCACCACTTTGGGAGGCCAAGGCAGGCCGGATCACCTGAGGTCA  
GGAGCTCGAGACCAGCCTGGCCAACATGGCAAACCCTGTCTCTACTAAAAATACAAAAAATTAGCCGGGTGTGTT  
GGCTGGCGCCTTAATCCCAGCTACTCGGGAGGCTGAGGCAGGAGAATTGCTTGAACCCGGGAGGCAGAGGTTG  
CAGTGAGCCGAGACTGTGCCACTGCACTCCAGCCTGGGACACAGAGTGAGACTC

>hsamiR1972

TCAGGCCAGGCACAGTGGCTCA

>AANU01178229.1\_7254x6952\_RF00100\_7SK

AGGCCAGGCACAGTGGCTCATGCCTGTAATCCCAGCGATTTGGGAGGCTGAGGCAGGCCGACCACCTGAGGTCA  
GGAGTTCGAGACCAGCCTGGCCAACATAGTGAAACCCTGTCTCTACTAAAAATACAAGAAATTAGCCAGATGTGG  
TGGCACGCAGCTGTAATCCCAGCAATTCAGGAGGTTGAGGCAGGAGAAACACTTGAACCCGGGAGGCAGAGATT  
GCAGTGAGGTGAGATTGTGCTACTGCACTCCAGCCTGGGCAACAGAGTGAGACTC

>OR7D2

AGGCCAGGCACAGTGGCTCACACCTGTAATCCCAGCACTTTGGGAGGCCGAGGTGGGCGTATCACCTGAGGTCA  
GGAGTTCAAGACCAGCCTGGCCAACATGGTGAAACCCTGTCTCTACTAAAAATAGAAGAATTAGCTGGGTGGGT  
GGCAGGTGCCTGTAGTCCCAGCTACTCAGGAGGTTGAGGCAGGAGAATCGCTTGAACCTGGGAGGTGGAGGTTG  
CAGTGAGATGAGATCGCGCCACTGCACTCCAGCCTGGGCAACAGAGTGAGACTC

>hsamiR1273a

GGGCGACAAAGCAAGACTCTTTCTT

>AluS

GGGCTTGGTGGCTCACACCTGTAATCCCAGCACTTTGGAAGGCCAAGGTGGGTGGATCACGAGGTCAGGAGTTC  
GAGACCAGCCTGGCCAACATAGTGAAACCCATCTCTACTAAAAATACAAAATTAGCCGGGCGTGGTGGCGCTCG  
CCTATAATCCCAGCTACTCAGCGGGCTGAGGCAGGAGAATTGCTTGAACCCGGGTGGTGGAGGTTGCAGTGAGC  
CAAGATTGCGCCACTGCACTCCAGCCTGGGCGACAAAGCAAGACTC

>RP11-644F5.10.1

GGGCGTGGTGGCTCACACCTGTAATCCCAGCACTTTGGGAGGCTGAGGTGGGCGGATCACGAGGTCAGGAGTTT  
GAGACCAACCTGGCCAACATAGTGAAACCCTGTCTCTACTAAAAATACAAAATAAGCCAGGCATGGTGGCGCAT  
GCCTGTAGTCCCAGCTACTCGGGAGGCTGAGGCAGGAGAATCGCTTGAACCCGGGGGTGGAAATTGTGGTGAG  
CCAAGATCGCGCCACTGCACTCCAGCCTGGGCGACAGAGCAAGACTC

>hsamiR1273a

GGGCGACAAAGCAAGACTCTTTCTT

>AluS

TGGTGGCTCACACCTGTAATCCCAGCACTTTGGAAGGCCAAGGTGGGTGGATCACGAGGTCAGGAGTTCGAGACC  
AGCCTGGCCAACATAGTGAAACCCATCTCTACTAAAAATACAAAATTAGCCGGGCGTGGTGGCGCTCGCCTATAA  
TCCCAGCTACTCAGCGGGCTGAGGCAGGAGAATTGCTTGAACCCGGGTGGTGGAGGTTGCAGTGAGCCAAGATT  
GCGCCACTGCACTCCAGCCTGGGCGACAA

>RP11-644F5.10.1

TGGTGGCTCATGCCTGTAATCCCAGCACTTTGGGAGGCCGGGTGGGTGGATCACCTGAGGTCAGGAGTTCAAAA  
CCAGCCTGGCCAACATGGTATAAACCCTCTCTACTAAAAATACAAAAAATTAGCTGGGAGTGGTGGCACGTGCC  
TGTAAGCCCAGCTAATCGGGAGGCTGAGGCAGGAGAATCACATGAACCTGAGAGGCAGGGGTTGCAGTGAGCT  
GAGATCTCGCCATTGCACTCCAGCCTAGGCAACAAGAGCAAAACGCTTAAAAAAAAAAAAACAAAAAAACTCA  
GGCCTACTCCCGTTGTCCTCATCATGTCTCCTTTGTGCTCCACGGAACCTTGAACCTTATTGTTTAAAGACGAGA  
GGCAAGGCCGGGCGTGGTGGCTCACACCTGTAATCCCAGCACTTTGGGAGGCTGAGGTGGGCGGATCACGAGGT  
CAGGAGTTTGGAGCAACCTGGCCAACATAGTGAAACCCTGTCTCTACTAAAAATACAAAATAAGCCAGGCATG  
GTGGCGCATGCCTGTAGTCCCAGCTACTCGGGAGGCTGAGGCAGGAGAATCGCTTGAACCCGGGGGTGGAAAT  
TGTGGTGAGCCAAGATCGCGCCACTGCACTCCAGCCTGGGCGACAGAGCAAGACTC

>hsamiR1273a

GGGCGACAAAGCAAGACTCTTTCTT

>AluS

GGTCAGGAGTTCGAGACCAGCCTGGCCAACATAGTGAAACCCATCTCTACTAAAAATACAAAAATTAGCCGGGCG  
TGGTGGCGCTCGCCTATAATCCCAGCTACTCAGCGGGCTGAGGCAGGAGAATTGCTTGAACCCGGGTGGTGGAG  
GTTGCAGTGAGCCAAGATTGCGCCACTGCACTCCAGCCTGGGCGACAAAGCAAGACTC

>TMEM170A

GGTCAGGAGATTGAGACCATCCTGGCTAACACGGTGAAACCCCGTCTCTACTAAAAATACAAAAATTAGCTGGG  
CATGGTGGTGGACGTCCGTAGTCCCAGCTACTCGGGAGGCTGAGGCAGGAGAATGGCGTGAACCCGGGAGGCA  
GAGCTTGCAGTGAGCCGAGATCATGCCACTGCACTCCAGCCTGGGCGACAGAGCAAGACTC

>hsamiR1273a

GGGCGACAAAGCAAGACTCTTTCTT

>AluS

GGCTGGGCTTGGTGGCTCACACCTGTAATCCCAGCACTTTGGAAGGCCAAGGTGGGTGGATCACGAGGTCAGGA  
GTTTCGAGACCAGCCTGGCCAACATAGTGAAACCCATCTCTACTAAAAATACAAAAATTAGCCGGGCGTGGTGGCG  
CTCGCCTATAATCCCAGCTACTCAGCGGGCTGAGGCAGGAGAATTGCTTGAACCCGGGTGGTGGAGGTTGCAGTG  
AGCCAAGATTGCGCCACTGCACTCCAGCCTGGGCGACAAAGCAAGACTC

>FAM83G

GGCTGGGCACGGTGGCTCACGCTTGAATCCCAGCACTTTGGGAGGTGAGGCGGGCGATCACGAGGTCAGGAG  
ATCAAGACCATCCTGGCTAAACAAGGTGAAACCTCGTCTCTATTTAAAAATACAAAAATTAGCCGGGCGTGGTGG  
CAGGCGCTGTTGTCCCAGCTACTTGGGAGGCTGAGGCAGGAGAATGGCGTGAACCCGGAGGCGGAGCTTGCA  
TGAGCCGAGATCGCACCCTGCACTCCAGCCTGGGCGACAGAGCAAGACTC

>hsamiR1273a

GGGCGACAAAGCAAGACTCTTTCTT

>AluS

AGCACTTTGGAAGGCCAAGGTGGGTGGATCACGAGGTCAGGAGTTCGAGACCAGCCTGGCCAACATAGTGAAAC  
CCATCTCTACTAAAAATACAAAAATTAGCCGGGCGTGGTGGCGCTCGCCTATAATCCCAGCTACTCAGCGGGCTGA  
GGCAGGAGAATTGCTTGAACCCGGGTGGTGGAGGTTGCAGTGAGCCAAGATTGCGCCACTGCACTCCAGCCTGG  
GCGACAAAGCAAGACTC

>SAR1B

AGCACTTTGGGAGGCTGAGGCAGGTGGATCACGTGAGGTCAGAAGTTCGACAAGCCTGGACAACATGGTGA AAC  
CCTGTCTCTACTAACAATACAAATATTAGCCAGCTGTGGTGGCGCACGCCTGTAATCCAAGCTACTTGAAGGTTG  
AGGCAGGAGAATCACTTGAAGCTGGGAGGTGGAGGTTGCAGTGAGTGGAGATCACACCCTGCACTCCAGCCTG  
GGTGACAAAGCAAGACTC

>hsamiR548g\_5p

TGCAAAAGTAATTGCAGTTTTTG

>MADE1

GCAAAAGTAATTGCAGTTTTTG

>ANKRD5

GCAAAAGTAATTGCGTTTTTG

>hsamiR548i

AAAAGTAATTGCGGATTTTGCC

>MADE1

GCAAAAGTAATTGCGGATTTTG

>ANKRD5

GCAAAAGTAATTGCGGTTTTTG

>hsamiR548x\_5p

TGCAAAAGTAATTGCAGTTTTTG

>MADE1

GCAAAAGTAATTGCAGTTTTTG

>ANKRD5

GCAAAAGTAATTGCGGTTTTTG

>hsamiR548g\_5p

TGCAAAAGTAATTGCAGTTTTTG

>MADE1

GTGCAAAAGTAATTGCAGTTTTTG

>KATNAL1

GTGCAAAAGTAATTGCGGTTTTTG

>hsamiR548x\_5p

TGCAAAAGTAATTGCAGTTTTTG

>MADE1

GTGCAAAAGTAATTGCAGTTTTTG

>KATNAL1

GTGCAAAAGTAATTGCGGTTTTTG

>hsamiR548g\_5p

TGCAAAAGTAATTGCAGTTTTTG

>MADE1

GTGCAAAAGTAATTGCAGTTTTTG

>HLA-DMB

GTGCAAAAGTAATTGCGGTTTTTG

>hsamiR548x\_5p

TGCAAAAGTAATTGCAGTTTTTG

>MADE1

GTGCAAAAGTAATTGCAGTTTTTG

>HLA-DMB

GTGCAAAAGTAATTGCGGTTTTTG

>hsamiR548k

AAAAGTACTTGCGGATTTTGCT

>MADE1

TGGTGCAAAAGTACTTGCGGATTTTGCT

>HLA-DMB

TGGTGCAAAAGTAATTGCGGTTTTTGCT

>hsamiR548k

AAAAGTACTTGCGGATTTTGCT

>MADE1

TGTTAGGTTGGTGCAAAAGTACTTGCGGATTTTGCT

>KATNAL1  
TGTTAGGCTGGTGCAAAAGTAATTGCGGTTTTTGC

>hsamiR548i  
AAAAGTAATTGCGGATTTTGCC  
>MADE1  
TTGGTGCAAAAGTAATTGCGGATTTTGC  
>ANKRD5  
TTGGAGCAAAAGTAATTGCGGTTTTTGC

>hsamiR548i  
AAAAGTAATTGCGGATTTTGCC  
>MADE1  
AGGTTGGTGCAAAAGTAATTGCGGATTTTGC  
>ANKRD5  
AGGTTGGAGCAAAAGTAATTGCGGTTTTTGC

>hsamiR548i  
AAAAGTAATTGCGGATTTTGCC  
>MADE1  
GTGCAAAAGTAATTGCGGATTTTGC  
>ZNF154  
GTGCAAAAGTAATTGCCGTTTTTGC

>hsamiR548q  
GCTGGTGCAAAAGTAATGGCGG  
>MADE1  
GTGCAAAAGTAATGGCGGTTTTTGC  
>ZNF154  
GTGCAAAAGTAATTGCCGTTTTTGC

>hsamiR548d\_5p  
AAAAGTAATTGTGGTTTTTGCC  
>MADE1  
AGGTTGGTGCAAAAGTAATTGTGGTTTTTGC  
>ZNF154  
AGGTTAGTGCAAAAGTAATTGCCGTTTTTGC

>hsamiR548i  
AAAAGTAATTGCGGATTTTGCC  
>MADE1  
AGGTTGGTGCAAAAGTAATTGCGGATTTTGC  
>ZNF154  
AGGTTAGTGCAAAAGTAATTGCCGTTTTTGC

>hsamiR548i  
AAAAGTAATTGCGGATTTTGCC  
>MADE1

AGGTTTGTGCAAAAAGTAATTGCGGATTTTGC  
>ZNF154  
AGGTTAGTGCAAAAAGTAATTGCCGTTTTTGC

>hsamiR548w  
AAAAGTAACTGCGGTTTTTGCT  
>MADE1  
AGGTTGGTGCAAAAAGTAACTGCGGTTTTTGC  
>ZNF154  
AGGTTAGTGCAAAAAGTAATTGCCGTTTTTGC

>hsamiR548x\_5p  
TGCAAAAAGTAATTGCAGTTTTTG  
>MADE1  
AGGTTAGTGCAAAAAGTAATTGCAGTTTTTGC  
>ZNF154  
AGGTTAGTGCAAAAAGTAATTGCCGTTTTTGC

>hsamiR548g\_5p  
TGCAAAAAGTAATTGCAGTTTTTG  
>MADE1  
GTGCAAAAAGTAATTGCAGTTTTTGC  
>CDC27  
GTGCAAAAAGTAATTGCAGGTTTTTGC

>hsamiR548x\_5p  
TGCAAAAAGTAATTGCAGTTTTTG  
>MADE1  
TATTAGGTTAGTGCAAAAAGTAATTGCAGTTTTTGC  
>CDC27  
TATTAAGTTGGTGCAAAAAGTAATTGCAGGTTTTTGC

>hsamiR548a\_3p  
CAAAACTGGCAATTACTTTTTGC  
>MADE1  
CAAAACTGGCAATTACTTTTTGCACCAA  
>CD38  
GCATTTGTTGGAAGAGAATATAAACTACTATTAGTTTGGTATGAAAGGCCTAGAAGGAAAAAGCACATGAATTTT  
GGAGTTGGACAGAGTTGAGTTCAAATTCAGTCTCTAGCTTGATACTAAATGTAGGACTTACGGTAAATTATTAGGT  
TGGTTCAAAATAATTGTGGTTTTGCCATTCTTTCGGTGGCAAACTTGCAATTACTTTTTGC

>hsamiR548a\_3p  
CAAAACTGGCAATTACTTTTTGC  
>MADE1  
GCAAACTGGCAATTACTTTTTGCACCAA  
>CD38

GCATTTGTTGGAAGAGAATATAAACTACTATTAGTTTGGTATGAAAGGCCTAGAAGGAAAAAGCACATGAATTTT  
GGAGTTGGACAGAGTTGAGTTCAAATTCAGTCTCTAGCTTGATACTAAATGTAGGACTTACGGTAAATTATTAGGT  
TGGTTCAAAAATAATTGTGGTTTTGCCATTCTTTCCGGTGGCAAAACTTGCAATTACTTTTGC

>hsamiR548a\_3p

CAAACTGGCAATTACTTTTGC

>MADE1

GCAAACTGGCAATTACTTTTGCACCAAC

>CD38

GCATTTGTTGGAAGAGAATATAAACTACTATTAGTTTGGTATGAAAGGCCTAGAAGGAAAAAGCACATGAATTTT  
GGAGTTGGACAGAGTTGAGTTCAAATTCAGTCTCTAGCTTGATACTAAATGTAGGACTTACGGTAAATTATTAGGT  
TGGTTCAAAAATAATTGTGGTTTTGCCATTCTTTCCGGTGGCAAAACTTGCAATTACTTTTGC

>hsamiR603

CACACTGCAATTACTTTTGC

>MADE1

TGCAATTACTTTTGTCCAACCTAA

>CD38

GCATTTGTTGGAAGAGAATATAAACTACTATTAGTTTGGTATGAAAGGCCTAGAAGGAAAAAGCACATGAATTTT  
GGAGTTGGACAGAGTTGAGTTCAAATTCAGTCTCTAGCTTGATACTAAATGTAGGACTTACGGTAAATTATTAGGT  
TGGTTCAAAAATAATTGTGGTTTTGCCATTCTTTCCGGTGGCAAAACTTGCAATTACTTTTGC

>hsamiR548u

CAAAGACTGCAATTACTTTTGC

>MADE1

TGCAATTACTTTTGCGCCAAC

>CD38

GCATTTGTTGGAAGAGAATATAAACTACTATTAGTTTGGTATGAAAGGCCTAGAAGGAAAAAGCACATGAATTTT  
GGAGTTGGACAGAGTTGAGTTCAAATTCAGTCTCTAGCTTGATACTAAATGTAGGACTTACGGTAAATTATTAGGT  
TGGTTCAAAAATAATTGTGGTTTTGCCATTCTTTCCGGTGGCAAAACTTGCAATTACTTTTGC

>hsamiR548u

CAAAGACTGCAATTACTTTTGC

>MADE1

TATTAGGATGGTGCAAAGTAATGTGGTTTTTTCTTACTTTTAATGGCAAAGACTGCAATTACTTTTGC

>MTMR6

TATTAGGTTGGTGCAAAGTAATGCGGTTTTTGTCACTTTCAATGGCAAAGCCCCAATTACTTTTGC

>hsamiR1202

GTGCCAGCTGCAGTGGGGGAG

>MER52A

CCAGCTGCAGTGGGGGAGGCACTGC

>LFNG

CCAGCTGCAGTGGGGGCTCCGGCACTGC

>hsamiR3118

TGTGACTGCATTATGAAAATTCT



>L1PA13\_5

TTATAAATCCCATATATCTCAGATGTTTTGTTTCATTCCCTTTCATTCTTTTTTCCCCATTCTTGTTTGCCTGTTTTATT  
TCAGAAAGCCAGTTTTCAAGCTCTGGGATTCTTCTCTTCTTGGTCTATTCTGTTGGATGGTCTTGACATGAGAT  
GGAGCTGGTCTGACCTCAGCCCTCCCTAGTCTGCTTGCCTCTCCAGGACCCAGCCTGGCCACACCTGCTTACAG  
GGCACTCTCAGGTGCCACACATAACAATAATTCATAATGCAATCACACACAATCACCATGTGACTGCATTATGAA  
AATTCTTCTAGTGTGATTTACAGCTCTGTCAGGTCAGTATTTTCTTCTTTATACTTGCTCTTTTGTCTGTTACTTCTG  
CAATGTTTTACAATGATTTTTAGCTTCCTTGTATTGGATTACAACATACTTCTTTCACGCAATGAACCTTTGTTCTACC  
CATATCCTGAACCTGCTTGTATCATTTCAGACATCTCAGCCTCAGCCAGTTCTGAACACTTGCTGGAGAGTTGAT  
GCAGTCATTTGGAGAAAAGAAGGCATGC

>POTEC

TTATAAATCCCATATTTCTCGGATGTTTTGTTTCATTCCCTTTCATTCTTTTTTCCCCATTCTTGTTTGCCTGTTTTATT  
TCAGAAAGCCAGTTTTCAAGCTCTGGGATTCTTCTCTTCTTGGTCTATTCTGTTAGATGGTCTTGACATGAGAT  
GGAGCTGGTCTGACCTCAGCCCTCCCTAGTCTGCTTGCCTCTCCAGGACCCAGCCTGGCCACACCTGCTTACAG  
GGCACTCTCAGGTGCCACACATACTACAATAATTCATAATGCAATCACACACAATCACCATGTGACTACATTAT  
GAAAATTTCTTCTAGTGTGATTTACAGCTCTGTCAGGTCAGTATTTTCTTCTTTATACTCACTATTTTGTCTGTTAGTT  
CCTGCAATGTTTTACAATGATTTTTAGCTTCCTTGTATTGGATTACAACATACTTCTTTCACCTCAATGAACCTTTGTTCC  
TACCCATATCCTGAACCTGCTTGTATCATTTCAGACATCTCAGCCTCAGCCAGTTCTGAACACTTGCTGGAGAGT  
TGATGCAGTCATTTGGAGAAAAGAAGGTATGC

>hsamiR762

GGGGCTGGGGCCGGGGCCGAGC

>NonLTR\_5\_CR\_Non\_LTR\_Retrotransposon\_Chlamydomonas\_reinhardtii

GGCTGGGGCCGGGGCCG

>FURIN

GGCTGGGGCCGGGGCCGGGGC

>hsamiR762

GGGGCTGGGGCCGGGGCCGAGC

>NonLTR\_5\_CR\_Non\_LTR\_Retrotransposon\_Chlamydomonas\_reinhardtii

GGGCTGGGGCCGGGGCCG

>STARD8

GGGCTGGGGCCGGGGCCGGGGC

>hsamiR708\_5p

AAGGAGCTTACAATCTAGCTGGG

>L2\_Platt1r

CTGCCCTCAAGGAGCTTACAATCTAGC

>DCAF10

CTGCCCTCAAGGAGCTTACAGTCTAGC

>hsamiR1273d

GAACCCATGAGGTTGAGGCTGCAGT

>AluSq

GAGACCAGCCTGGCCAACATGTTGAAACCCCATCTCTACTAAAACCACAAAAATTAACCTGGTGGTGTGTTGGGCA  
CCTGTAATCCCAGCTACTCGGTAGGCTGAGGTAGGAGAATCGCTTGAACCCATGAGGTTGAGGCTGCAGTGAGC

>USP33

GAGACTAGCCTGGCCAACATGGTGAACCCCATCTCTACTAAAATACAAAAATTAGCCGGGCATGGTGGCAGGTG  
CCTGTAATCCCAGCTACTCGAGAGGCTGAGGCAGGAGAATCGCTTGAACCCAGGAGGTGGAGGCTGCAGTGAGC

>hsamiR1254

AGCCTGGAAGCTGGAGCCTGCAGT

>AluJr

AGCTACTTGGGAAGCTGAGGTGGGAGGATTGCTTGAACCCAGGAGGTGGAGGCTGCAGTGAACCTATCATTGTGCC  
ACTGTACTCCAGC

>ORAI2

AGCTACTTGGGAGACTGAGGTGGGAGGATTGCTTGCGCCAGAAGCTGGAGCCTGCAGAGAGCTATGATTGCAC  
CACTGCACTCCAGC

>hsamiR568

ATGTATAAATGTATACACAC

>EnSpm\_7\_HM\_EnSpm\_Hydra\_magnipapillata

TATAAATGTATACACACTTCC

>SV2C

TATAAATGTATACACAATTCC

>hsamir376c

AACATAGAGGAAATTCCACGT

>CER15\_I\_CE\_LTR\_Retrotransposon\_Caenorhabditis\_elegans

CATAGAGGAAATTCC

>PRKCH

CATAGAGGAAATTCC

>hsamiR1972

TCAGGCCAGGCACAGTGGCTCA

>AANU01178229.1\_7254x6952\_RF00100\_7SK

AGGCCAGGCACAGTGGCTCATGCCTGTAATCCCAGCAATTTGGGAGGCTGAGGCAGGCGGATCACCTGAGGTCA  
GGAGTTCGAGACCAGCCTGGCCAACATAGTGAAACCCTGTCTCTACTAAAAATACAAGAAATTAGCCAGATGTGG  
TGGCATGCACCTGTAATCCCAGCAATTCAGGAGGTTGAGGCAGGAGAAACACTTGAACCCGGGAGGCAGAGATT  
GCAGTGAGGTGAGATTGTGCTACTGCACTCC

>HP1BP3

AGGCCAGGCACAGTGGCTCACTCCTGTAATCCCAGCAATTTGGGAGGCCGAGGCAGGCGGATCACCTGAGGTCA  
GGAGTTCGAGACCAGCCTGACCAACACGGCGAAACCCCATCTCTACTAAAAATACAAAAAAATTGCCAGGCGTGG  
TGGTACACACCTGTAATCCCAGCTACTCGGGAGGCTGAAGCAGGAGAATTGCTTGAACCCAGGAGGTGGAGGTT  
GCAGTGAGCTGAGATTGCACCACTGCACTCC

>hsamiR1972

TCAGGCCAGGCACAGTGGCTCA

>AANU01178229.1\_7254x6952\_RF00100\_7SK

AGGCCAGGCACAGTGGCTCATGCCTGTAATCCCAGCGATTTGGGAGGCTGAGGCAGGCGGACCACCTGAGGTCA  
GGAGTTCGAGACCAGCCTGGCCAACATAGTGAAACCCTGTCTCTACTAAAAATACAAGAAATTAGCCAGATGTGG  
TGGCACGCAGCTGTAATCCCAGCAATTCAGGAGGTTGAGGCAGGAGAAACACTTGAACCCGGGAGGCAGAGATT  
GCAGTGAGGTGAGATTGTGCTACTGCACTCC

>HP1BP3

AGGCCAGGCACAGTGGCTCACTCCTGTAATCCCAGCACTTTGGGAGGCCGAGGCAGGCGGATCACCTGAGGTCA  
GGAGTTCGAGACCAGCCTGACCAACACGGCGAAACCCCATCTCTACTAAAAATACAAAAAATTGCCAGGCGTGG  
TGGTACACACCTGTAATCCCAGCTACTCGGGAGGCTGAAGCAGGAGAATTGCTTGAACCCAGGAGGTGGAGGTT  
GCAGTGAGCTGAGATTGCACCACTGCACTCC

>hsamiR376a\_3p  
ATCATAGAGGAAAATCCACGT  
>CER15\_I\_CE\_LTR\_Retrotransposon\_Caenorhabditis\_elegans  
AATCATAGAGGAAAATCC  
>BCAT1  
AATCATTGAGGAAAATCC

>hsamir376b  
ATCATAGAGGAAAATCCATGTT  
>CER15\_I\_CE\_LTR\_Retrotransposon\_Caenorhabditis\_elegans  
AATCATAGAGGAAAATCC  
>BCAT1  
AATCATTGAGGAAAATCC

>hsamiR548d\_5p  
AAAAGTAATTGTGGTTTTTGCC  
>MADE1  
TATTAGGTTGGTGCAAAAGTAATTGTGGTTTTTGCC  
>NWD1  
TATTAGGTTGATGCAAAATTAATTGTGGTTTTTGCC

>hsamiR548w  
AAAAGTAACTGCGTTTTTGCCCT  
>MADE1  
GTTGGTGCAAAAGTAACTGCGTTTTTGCC  
>DENND4C  
GTTGGTACAAAAATAATTGCGTTTTTGCC

>hsamiR548d\_5p  
AAAAGTAATTGTGGTTTTTGCC  
>MADE1  
TATTAGGTTGGTGCAAAAGTAATTGTGGTTTTTGCC  
>RABL5  
TATTAGGTTGGTGCAAAAGTAATAGTGGCTTTTTGCC

>hsamiR1303  
TTTAGAGACGGGGTCTTGCTCT  
>PB1D11  
GAGACGGGGTCTTGCTCTGTTGCC  
>OR51E2  
GAGACAGGGTCTTGCTCTGTTGCC

>hsamiR1303

TTTAGAGACGGGGTCTTGCTCT

>PB1D11

TTTTAGAGACGGGGTCTTGCTCTGTTGCC

>RNF125

TTTTGGAGACAGGGTCTTGCTCTGTTGCC

>hsamiR1303

TTTAGAGACGGGGTCTTGCTCT

>PB1D11

AGAGACGGGGTCTTGCTCTGTTGCC

>TAMM41

AGAGACAGGGTCTTGCTCTGTTGCC

>hsamiR1303

TTTAGAGACGGGGTCTTGCTCT

>PB1D11

TTTTTTTTTTTTAAATTTTAGAGACGGGGTCTTGCTCTGTTGCC

>FAM55C

TTTTTTTTTTTTTTTTTTTAGAGACAGGGTCTTGCCTGTTGCC

>hsamiR1303

TTTAGAGACGGGGTCTTGCTCT

>PB1D11

TAGAGACGGGGTCTTGCTCTGTTGCC

>GTF2IRD2B

TAGAGATGGGGTCTTGCTATGTTGCC

>hsamiR1303

TTTAGAGACGGGGTCTTGCTCT

>PB1D11

TAGAGACGGGGTCTTGCTCTGTTGCC

>GTF2IRD2

TAGAGATGGGGTCTTGCTATGTTGCC

>hsamiR1271\_3p

AGTGCCTGCTATGTGCCAGGCA

>L2B

GTTGAGTGCCTGCTATGTGCC

>E2F3

GTTGAGTGCCTACTATGTGCC

>hsamiR762

GGGGCTGGGGCCGGGGCCGAGC

>NonLTR\_5\_CR\_Non\_LTR\_Retrotransposon\_Chlamydomonas\_reinhardtii

CGGGGCTGGGGCCGGGGCC

>STARD8

CGGGGCTGGGGCCGGGGCC

>hsamiR762

GGGGCTGGGGCCGGGGCCGAGC

>NonLTR\_5\_CR\_Non\_LTR\_Retrotransposon\_Chlamydomonas\_reinhardtii

GGGCTGGGGCCGGGGCCG

>STARD8

GGGCTGGGGCCGGGGCCGGGGCTGGGGCCGGGGCC

>hsamiR566

GGGCGCCTGTGATCCCAAC

>GarnAlu1

CAGTGGCTCATGCCTGTAATCCCAGCACTTTGGGAGGCTGAGACAGGTGGATCACGAGGTCAGGAGTTCGAGACC  
AGCCTGACCAACATGGAGAAACCCCATCTCTACTAAAAATACAAAAATTAGCTAGGCGTGGTGGCGGGCGCCTGT  
GATCCCAACTACTCAGGAGGCTGGGGCAGCAGAATCGCTTGAACCCGGGAGGCGAAGGTTGCAGTGAGCCAAGA  
TCGCGCCATTGCACTCCAGCCTGGGTGACAGAGTGAGACTCCATCTCAAAAAACAAACAAAAAATAAGCTG  
GGTGTGGTGGCTGACGCCTGTAATCCCAGCTAGTCAGGAGGCTGAGACAGGAGAATCGCTTGAACCCAGCAGAT  
GGAGTTGCAGTGAGCC

>CCDC113

CAGTGGCTCACGCCTGTAATCCCAACACTTGGGGAGGCCGAGGCGGGTGGATCATGAGGTCAGGAGTTCGAGAC  
CAGCCTGGCCAACATGGTGAACCCCATCTCTACTAAAAATAAAAATTAGCCAGGTGTGGTGGTGGGCGCCTGTA  
ATCCCAGCTACTGGGGAGGCTGAGGTAGGAGAATCGCTTGAACCCAGGAGGAGGAGGTTGCAGCGAGCCGAGA  
TCATGCCACTGCACTCCAGCATGGGGGACAGAGCAAGACTCCATCTCAAAAAAAAAAAAAAAAAAATTAGCTGGGCA  
TGGTGGCGCATAGCTGTAGCCCCAGCTACTCGAGAGGCTGAGGTGGGAGAATTGCTTGAATCCCAGAGGTGGAG  
GTTGCAGTGAGCC

>hsamiR566

GGGCGCCTGTGATCCCAAC

>GarnAlu1

CTGTAATCCCAGCACTTTGGGAGGCTGAGACAGGTGGATCACGAGGTCAGGAGTTCGAGACCAGCCTGACCAAC  
ATGGAGAAACCCCATCTCTACTAAAAATACAAAAATTAGCTAGGCGTGGTGGCGGGCGCCTGTGATCCCAACTACT  
CAGGAGGCTGGGGCAGCAGAATCGCTTGAACCCGGGAGGCGAAGGTTGCAGTGAGCCAAGATCGCGCCATTGC  
ACTCCAGCC

>DENR

CTGTAATACCAGCACTTTGGGAGGCTGAGGTGGGCAATCACGAGGTCAGGAGTTCGAGACCAGCCTGGCCAAC  
ATAGTGAACCCCATCTCTACTAAAAATACAAAAATTAGCTGGGCGTGGTGGCGGGCGCCTGTAATCCCACCTACT  
TGGGAGGCTGAGGCAGGAGAATCACTTGAACCCGGGAGGCGGAGGTTGCAGTGAGCCGAGATCGCACCCTGC  
ATTCCAGCC

>hsamiR1972

TCAGGCCAGGCACAGTGGCTCA

>AANU01178229.1\_7254x6952\_RF00100\_7SK

AGGCCAGGCACAGTGGCTCATGCCTGTAATCCCAGCAATTTGGGAGGCTGAGGCAGGCGGATCACCTGAGGTCA  
GGAGTTCGAGACCAGCCTGGCCAACATAGTGAAACCTGTCTCTACTAAAAATACAAGAAATTAGCCAGATGTGG  
TGGCATGCACCTGTAATCCCAGCAATTCAGGAGGTTGAGGCAGGAGAAACACTTGAACCCGGGAGGCAGAGATT  
GCAGTGAGGTGAGATTGTGCTACTGCACTCCAGCC

>CA5B

AGGCCAGGCACAGTGGCTCACACCTGTAATCCCAGCACTTTGGGAGGCCAAGACGGGTGGATCACGAGGTCAGA  
TCGAGACCATCCTGGTTAACACGGTGAAACCCCTGTCTCTACTAAAAATACAAAAAATAGCCGGGTGTGGTGGCGG

GCGCCTGTAGTCCCAGCTACTCAGGAGGCTGAGGCAGGAGAATGGCGTGAACCCGGGAGGCGGAGCTTGCAGT  
GAGCCGAGATCGCGCCACTGCACTCCAGCC

>hsamiR1972

TCAGGCCAGGCACAGTGGCTCA

>AANU01178229.1\_7254x6952\_RF00100\_7SK

AGGCCAGGCACAGTGGCTCATGCCTGTAATCCCAGCGATTTGGGAGGCTGAGGCAGGCGGACCACCTGAGGTCA  
GGAGTTCGAGACCAGCCTGGCCAACATAGTGAAACCCTGTCTCTACTAAAAATACAAGAAATTAGCCAGATGTGG  
TGGCACGCAGCTGTAATCCCAGCAATTCAGGAGGTTGAGGCAGGAGAAACACTTGAACCCGGGAGGCAGAGATT  
GCAGTGAGGTGAGATTGTGCTACTGCACTCCAGCC

>CA5B

AGGCCAGGCACAGTGGCTCACACCTGTAATCCCAGCACTTTGGGAGGCCAAGACGGGTGGATCACGAGGTCAGA  
TCGAGACCATCCTGGTTAACACGGTGAAACCCTGTCTCTACTTAAAAATACAAAAAATAGCCGGGTGTGGTGGCGG  
GCGCCTGTAGTCCCAGCTACTCAGGAGGCTGAGGCAGGAGAATGGCGTGAACCCGGGAGGCGGAGCTTGCAGT  
GAGCCGAGATCGCGCCACTGCACTCCAGCC

>hsamiR1285\_3p

TCTGGGCAACAAAGTGAGACCT

>AluJb

GGGCGAGTGGCTCACACCTGTAATCCAGCATTTTGGGAGGCCGAGGCTGGTGCATCACTTGAGCCCAGCAATT  
TGAGACCAATCTGGGCAACAAAGTGAGACC

>TMEM154

GGGCTCAGTGGCTCATGCCTGTAATCCCAGCACTTTGGGAGGCTGAGACAGGAGGACTGCTTGAGCCCAGGAGTT  
TGAAACCAGCCTGGGCAACATAGTGAGACC

>hsamiR3620

TCACCCTGCATCCCGCACCCAG

>Copia\_53\_SB\_I\_Copia\_Sorghum\_bicolor

CCCTGCATCCCGCACC

>NTN1

CCCTGCATCCCGCACC

>hsamiR1285\_5p

GATCTCACTTTGTTGCCAGG

>AluJ

CAAAGTGCTGGGATTGCAGGTGTGAGCCACC

>OPA3

TCTCACTATGTTGCCAGGCTGGTCTTCAGCTCCTGGGCTCAAAGAGATCCCTCCTGCCCTGGTCTCCCAAAGTGCT  
GGGATTACAGGTGTGAGCCACTGCACCTGGACGCCAGCGTACTCTTGGGGTGAGGAGGAATAGTGGGCTGAATG  
GCTTGAATGGTGTGCCCCAACAGACAAGTCCACATACTAACCCCCAGGACCTGTGCTTATGACAGTTTATTTGGA  
AAAAGTGTTTTTTTCAGATGTAATTAAGGGTCTTGAGGTGGGATCATCCTGAACTTAAGATGGGCCCTAAATGCAAT  
GACAGGTGTTCTTGTAAGAGACAAAATAGAAGAGGGAAAAGGCCATGTGAAGCTGCAGGCAGAGCCAAGGAAG  
GCCTGGAATCACCAGGAGCTGGAAGAGGGAGCGTGTCCCTGTCAGCACCTTGGTTTCAGACTTCTGGACTCCAGA  
ACTGTGTGAATTAATTCCTGTTGGACTTAAGCCATCAAGTTCACCACCAATGGTGATCTGTTATGGCAGTCCAAG  
GAAATTAATCAAGCAGTTAAGGCCAACTGCTGGCCTAATTGGTAGGATGGGGGTGGGACCGGGGGCTATGGAGG  
CAGGAGGGTACTGCTACATGAAGACAGGCTGTCGGGTGAGTCCAGAGCTCCGAGGAAAGAAAGCAAGAGCACAC

AGATTAGGAGACACGGATGGAAGATGAAGGATGTGACAATTGAATCCATGGGCTTGGATTGCGACTGGGTCCCTG  
AGAAATGCTACTGAGCAAGGTGGGAAGGCAAGAAAGGACATGCCACACAGTACAAGCTCCAGGGACTCTGAG  
GACAGGAAAATAGGGGGCTGAGGCTGAAGGACAGGCTGGATTAGCCCTAGTTAGGATCAAATTTCCACCACGG  
AAAGGGGGGTTGGAGGACATTCACAGAAAAGATCCTGTAGTGCCATTCCAGTGGGTTGTGCCATAGACTCAAGG  
ATGAGGGGGTTCTGTTGGAATAGTCCACTTCGGGTCTCAAGGGAAGGTACAATGATTCCAGGGATTGACTGCAGG  
CCAGGACCTTTTGTGGGTTTTTTAAGATGGAGTTTTGCTCGTTACCCAGGCTGGCATGCAATTGCGCAATCTCGGC  
TCACTGCAACCTCTGCCTCCCGGGTTCAAGCAATTCTCCTGTCTCAGCCTCCAAGTAGCTGGGATTACAGGTGCAT  
GCCACCATGCCAGCTAATTTATGTATTTTTAGTAGAGACGGGGTTTCATCATATTGGTCAGGCTGGTCTCGAGCTC  
CCGATCTCCCGACCTCCCGACTTCAAATGACCCGCCACCTCGACCTTCAAAGTGCTGGGATTGCAGGTGTGAGC  
CACC

>hsamiR548h\_3p

CAAAAACCGCAATTACTTTTGCA

>MADE1

AAAAACCGCAATTACTTTTGACCAACC

>KATNAL1

AAAAACCACAATTACTTTTGACCAACC

>hsamiR548t\_3p

AAAAACCACAATTACTTTTGACCA

>MADE1

AAAAACCACAATTACTTTTGACCAACC

>KATNAL1

AAAAACCACAATTACTTTTGACCAACC

>hsamiR548aa

AAAAACCACAATTACTTTTGACCA

>MADE1

AAAAACCACAATTACTTTTGACCAACC

>KATNAL1

AAAAACCACAATTACTTTTGACCAACC

>hsamiR548d\_5p

AAAAGTAATTGTGGTTTTTGCC

>MADE1

TTAGGTTGGTGCAAAAGTAATTGTGGTTTTTGCCATTGAAAGTAATGGCAAAAACCACAGTTTCTTTTGACCAACC

>KATNAL1

TTAGGCTGGTGCAAAAGTAATTGCGGTTTTTGCCATTGAAAGTAATGGAAAAACCACAATTACTTTTGACCAACC

>hsamiR548n

CAAAAGTAATTGTGGATTTTGT

>MADE1

TAGGTTGGTGCAAAAGTAATTGTGGATTTTGTCTGTTAAAAATAGCAAAACCCGCAATTACTTTTGACCAACC

>KATNAL1

TAGGCTGGTGCAAAAGTAATTGCGGTTTTTGCCATTGAAAGTAATGGAAAAACCACAATTACTTTTGACCAACC

>hsamiR548h\_5p

AAAAGTAATCGCGGTTTTTGTC

>MADE1

TTAGGTTGGTGCAAAAGTAATCGCGGTTTTTGTCATTGAAAGTAATAGCAAAAAGTCAATTACTTTTGCACCAAC  
C

>KATNAL1

TTAGGCTGGTGCAAAAGTAATTGCGGTTTTTGCCATTGAAAGTAATGGAAAAACCACAATTACTTTTGCACCAACC

>hsamiR548d\_3p

CAAAAACCACAGTTTCTTTTGC

>MADE1

TTAGGTTGGTGCAAAAGTAATTGTGGTTTTTGCCATTGAAAGTAATGGCAAAAACCACAGTTTCTTTTGCACCAACC

>KATNAL1

TTAGGCTGGTGCAAAAGTAATTGCGGTTTTTGCCATTGAAAGTAATGGAAAAACCACAATTACTTTTGCACCAACC

>hsamiR548aa

AAAAACCACAATTACTTTTGCACCA

>MADE1

TTAGGTTGGTGCAAAAGAAAGTGTGGTTTTTGCCATTACTTTCAATGGCAAAAACCACAATTACTTTTGCACCAACC

>KATNAL1

TTAGGCTGGTGCAAAAGTAATTGCGGTTTTTGCCATTGAAAGTAATGGAAAAACCACAATTACTTTTGCACCAACC

>hsamiR548f

AAAAACTGTAATTACTTTT

>MADE1

ACAAAAACTGTAATTAC

>AL353791.1.1

ACAAAAACTGTAATTAC

>hsamiR548f

AAAAACTGTAATTACTTTT

>MADE1

ACAAAAACTGTAATTAC

>CNTNAP3

ACAAAAACTGTAATTAC

>hsamiR548f

AAAAACTGTAATTACTTTT

>MADE1

ACAAAAACTGTAATTAC

>CNTNAP3B

ACAAAAACTGTAATTAC

>hsamiR1277\_5p

AAATATATATATATATGTACGTAT

>EnSpm-8\_HM

ATATATATATATATGTAC

>C3orf55

ATATATATATATATGTAC



>hsamiR1277\_5p  
AAATATATATATATATGTACGTAT  
>EnSpm-8\_HM  
ATATATATATATATGTAC  
>AHNAK  
ATATATATATATATGTAC

>hsamiR1277\_5p  
AAATATATATATATATGTACGTAT  
>EnSpm-8\_HM  
ATATATATATATATGTAC  
>WDFY3  
ATATATATATATATGTAC

>hsamiR1277\_5p  
AAATATATATATATATGTACGTAT  
>EnSpm-8\_HM  
ATATATATATATATGTAC  
>CREB1  
ATATATATATATATGTAC

>hsamiR1277\_5p  
AAATATATATATATATGTACGTAT  
>EnSpm-8\_HM  
AAATATATATATATATGTAC  
>CISD3  
AAATATATATATATATGTAC

>hsamiR3149  
TTTGTATGGATATGTGTGTAT  
>Chapaev\_8\_HM\_Chapaev\_Hydra\_magnipapillata  
TGTATGTGTGTATAC  
>OSBPL9  
TGTATGTGTGTATAC

>hsamiR1972  
TCAGGCCAGGCACAGTGGCTCA  
>AANU01178229.1\_7254x6952\_RF00100\_7SK  
GGCCAGGCACAGTGGCTCATGCCTGTAATCCCAGCAATTTGGGAGGCTGAGGCAGGCGGATCACCTGAGGTCAG  
GAGTTTCGAGACCAGCCTGGCCAACATAGTGAAACCCTGTCTCTACTAAAAATAC  
>EXPH5  
GGCCAGGCACGGTGGCTCATGCCTGTAATCCCAGCAGTTTGGGAGGCCGAGGTGGGCAGATCACCTGAGGTCAG  
AAGTTTGAGACCAGCCTGGCCAACCTGGTGAAACTCCAACCTCTACTAAAAATAC

>hsamiR1972  
TCAGGCCAGGCACAGTGGCTCA  
>AANU01178229.1\_7254x6952\_RF00100\_7SK

GGCCAGGCACAGTGGCTCATGCCTGTAATCCCAGCGATTTGGGAGGCTGAGGCAGGCGGACCACCTGAGGTCAG  
GAGTTTCGAGACCAGCCTGGCCAACATAGTGAAACCCTGTCTCTACTAAAATAAC

>EXPH5

GGCCAGGCACGGTGGCTCATGCCTGTAATCCCAGCAGTTTGGGAGGCCGAGGTGGGCAGATCACCTGAGGTCAG  
AAGTTTGAGACCAGCCTGGCCAACCTGGTGAAACTCCAACCTCTACTAAAATAAC

>hsamiR1268a

CGGGCGTGGTGGTGGGGG

>AluYc2\_Repetitive\_sequence\_Homo\_sapiens

AAAAGTTAGCCGGGCGTGGTGGTGGGGCCTGTGGTCCCAGCTACTTTGGAGGCTGAGGTGGAAGGATCACCTG  
AGCCAGGAGGTGGAGGCTGCAGTAAGCTTAGATTGCAGCACTGCGGTCCAGCCTGGGTGACAGAGTGAGAC

>ZNF713

AAAATTAGCTGGGCGTGGTGGTGCATACCTGTGGTCCCAGCTACTCAGGAGGCTGAGGCAGGAGAATCGCTTG  
AACCCAGGTGGCAGAGGTTGCAGTGAGCCAAGATTGTACCACTGCACTTCAGCCTGGGTGACAGAGTGAGAC

>hsamiR1273a

GGGCGACAAAGCAAGACTCTTTCTT

>AluS

CCAGCCTGGGCGACAAAGCAAGAC

>ZNF655

CCAGCCTGGGCAACAAAGCAAGAC

>hsamiR1273a

GGGCGACAAAGCAAGACTCTTTCTT

>AluS

CCTGTAATCCCAGCACTTTGGAAGGCCAAGGTGGGTGGATCACGAGGTCAGGAGTTCGAGACCAGCCTGGCCAA  
CA

>ZNF655

CCTGTAACCCAGCACTTTGGGAGGACAGGTGGGAGGATCGCTTGAGGCCAGGAGTTCAGACCAGCCTGGGCA  
ACAAAGCAAGAC

>hsamiR548h\_5p

AAAAGTAATCGCGGTTTTTGTC

>MADE1

GGTGCAAAAGTAATCGCGGTTTTTGTCATTACTTTTAATGGTAAAACTGGAATTACTTTTGAC

>HLA-DMB

GGTGCAAAAGTAATTGCGGTTTTTGCCACTGAAAGTAATGGCAAAAACTGCAATTACTTTTGAC

>hsamiR568

ATGTATAAATGTATACACAC

>EnSpm\_7\_HM\_EnSpm\_Hydra\_magnipapillata

GTGTATATATTATACATGTATA

>SPIN1

GTGTATATATTATATATGTATACACAC

>hsamir329

AACACACCTGGTTAACCTCTTT

>hATm\_28\_HM\_hAT\_Hydra\_magnipapillata

ACACACCTGGTTAAC  
>F2RL1  
ACACACCTGGTTAAC

>hsamiR548t\_3p  
AAAAACCACAATTACTTTTGCACCA  
>MADE1  
AATGACAAAAACCACAATTACTTTTGCACCAACCTAAC  
>RABL5  
AATGGCAAAAACCACGATTAGTTTTGCACCAACCTAAC

>hsamiR548t\_3p  
AAAAACCACAATTACTTTTGCACCA  
>MADE1  
AAAACCACAATTACTTTTGCACCAACCTAAC  
>ZNF154  
AAAACCACAGTTACTTTTGCACCAACCTAAC

>hsamiR548h\_3p  
CAAAAACCGCAATTACTTTTGC  
>MADE1  
AATGACAAAAACCGCAATTACTTTTGCACCAAC  
>MTMR6  
AATGGCAAAAAGCCCCAATTACTTTTGCAGCAAC

>hsamiR548t\_3p  
AAAAACCACAATTACTTTTGCACCA  
>MADE1  
AATGACAAAAACCACAATTACTTTTGCACCAAC  
>MTMR6  
AATGGCAAAAAGCCCCAATTACTTTTGCAGCAAC

>hsamiR548aa  
AAAAACCACAATTACTTTTGCACCA  
>MADE1  
TGGTGCAAAAAGAACTGTGGTTTTTGCATTACTTTTACAGGCAAAAACCACAATTACTTTTGCACCAAC  
>MTMR6  
TGGTGCAAAAAGTAATTGCGGTTTTTGTCACTTTTCAATGGCAAAAAGCCCCAATTACTTTTGCAGCAAC

>hsamiR548a\_5p  
AAAAGTAATTGCGAGTTTTACC  
>MADE1  
TATTAGGTCGGTGCAAAAAGTAATTGCGAGTTTTACCATTACTTTTCAATGGCAAAAAGTTGGCAATTACTTTTGCACCAAC  
C  
>MTMR6  
TATTAGGTTGGTGCAAAAAGTAATTGCGGTTTTTGTCACTTTTCAATGGCAAAAAGCCCCAATTACTTTTGCAGCAAC  
C

>hsamiR548a\_3p  
CAAAACTGGCAATTACTTTTGC  
>MADE1  
TATTAGGTCGGTGCAAAAAGTAATTGCGAGTTTTACCATTACTTTCAATGGCAAAACTGGCAATTACTTTTGCACCAA  
C  
>MTMR6  
TATTAGGTTGGTGCAAAAAGTAATTGCGGTTTTTGTCACTTTCAATGGCAAAAAGCCCCAATTACTTTTGCAGCAA  
C

>hsamiR548aa  
AAAAACCACAATTACTTTTGCACCA  
>MADE1  
TATTAGGTTGGTGCAAAAAGAACTGTGGTTTTTGCATTACTTTCAATGGCAAAAACCACAATTACTTTTGCACCAA  
C  
>MTMR6  
TATTAGGTTGGTGCAAAAAGTAATTGCGGTTTTTGTCACTTTCAATGGCAAAAAGCCCCAATTACTTTTGCAGCAA  
C

>hsamiR548c\_3p  
CAAAAATCTCAATTACTTTTGC  
>MADE1  
CAATTACTTTTGCACCAAC  
>HLA-DMB  
CAATTACTTTTGCACCAAC

>hsamiR548a\_3p  
CAAAACTGGCAATTACTTTTGC  
>MADE1  
CAATTACTTTTGCACCAAC  
>KATNAL1  
CAATTACTTTTGCACCAAC

>hsamiR548t\_3p  
AAAAACCACAATTACTTTTGCACCA  
>MADE1  
CAATTACTTTTGCACCAAC  
>CD38  
CAATTACTTTTGCACCAAC

>hsamiR548aa  
AAAAACCACAATTACTTTTGCACCA  
>MADE1  
CAATTACTTTTGCACCAAC  
>CD38  
CAATTACTTTTGCACCAAC

>hsamiR548u  
CAAAGACTGCAATTACTTTTGC

>MADE1  
TGCAATTACTTTTGCGCCAAC  
>CD38  
TGCAATTACTTTTGCACCAAC

>hsamiR548a\_3p  
CAAAACTGGCAATTACTTTTGC  
>MADE1  
GCAAAACTGGCAATTACTTTTGCACCAAC  
>CD38  
GCAAAACTGGCAATTACTTTTGCACCAAC

>hsamiR548a\_3p  
CAAAACTGGCAATTACTTTTGC  
>MADE1  
TTATTAGGTCGGTGCAAAAGTAATTGCGAGTTTTACCATTACTTTCAATGGCAAAACTGGCAATTACTTTTGCACCA  
AC  
>CD38  
TTATTAGGTTGGTTCAAAAATAATTGTGGTTTTGCCATTCCTTCGGTGGCAAAACTTGAATTACTTTTGCACCAAC

>hsamiR548g\_3p  
AAAAGTAAATTACTTTTGTAC  
>MADE1  
AAAAGTAAATTACTTTTGTACCAAC  
>HLA-DMB  
AAAAGTAAATTACTTTTGCACCAAC

>hsamiR548a\_3p  
CAAAACTGGCAATTACTTTTGC  
>MADE1  
AATGGCAAAACTGGCAATTACTTTTGCACCAAC  
>HLA-DMB  
AATGGCAAAACTGGCAATTACTTTTGCACCAAC

>hsamiR603  
CACACTGCAATTACTTTTGC  
>MADE1  
TGGTGCAAAAGTAATTGCAGTGCTTCCCATTTAAAAGTAATGGCACACTGCAATTACTTTTGTCCAAC  
>HLA-DMB  
TGGTGCAAAAGTAATTGCGTTTTTGGCACTGAAAGTAATGGCAAAACTGCAATTACTTTTGCACCAAC

>hsamiR603  
CACACTGCAATTACTTTTGC  
>MADE1  
TAATGGCACACTGCAATTACTTTTGTCCAAC  
>LRRC55  
TAATGGCAAAACCGCAATTACTTTTGCACCAAC

>hsamiR548a\_3p  
CAAAACTGGCAATTACTTTTGC  
>MADE1  
GCAAAAAGTAATTGCGAGTTTTACCATTACTTTCAATGGCAAACTGGCAATTACTTTTGCACCAAC  
>LRRC55  
GCAAAAAGTAATTGGGATTTTTGCTATCATTTTTAATGGCAAAAACCGCAATTACTTTTGCACCAAC

>hsamiR1277\_5p  
AAATATATATATATATGTACGTAT  
>EnSpm-8\_HM  
ATATATATATATATGTA  
>SRP72  
TATATATATATATAAAC

>hsamiR1289  
TGGAGTCCAGGAATCTGCATTTT  
>MER5A  
GAATCTGCATTTTTA  
>GADL1  
GAATCTGCATTTTTA

>hsamiR1289  
TGGAGTCCAGGAATCTGCATTTT  
>MER5A  
CCAGGAATCTGCATTTTTA  
>CXorf23  
CCAAGAATCTGCATTTTTA

>hsamiR1289  
TGGAGTCCAGGAATCTGCATTTT  
>MER5A  
CTGGGTGTGGAGTCCAGGAATCTGCATTTTTA  
>CXorf23  
CTGGGTGGGGCCAAGAATCTGCATTTTTA

>hsamiR2054  
CTGTAATATAAATTTAATTTATT  
>EnSpm2\_SB\_EnSpm\_Sorghum\_bicolor  
TATAAATTTAATTTA  
>CDH7  
TATAAATTTAATTTA

>hsamiR2054  
CTGTAATATAAATTTAATTTATT  
>EnSpm2\_SB\_EnSpm\_Sorghum\_bicolor  
CTGTAATATAAATTTA  
>PDE5A  
CTGTAATATAAATTTA

>hsamiR1289  
TGGAGTCCAGGAATCTGCATTTT  
>MER5A  
CCAGGAATCTGCATTTTTA  
>MTHFR  
CCAGGAATCTGCATTCTTA

>hsamiR548q  
GCTGGTGCAAAAGTAATGGCGG  
>MADE1  
TATTAGGCTGGTGCAAAAGTAATGGCGGTTTTTGCCATTA  
>RABL5  
TATTAGGTTGGTGCAAAAGTAATAGTGGCTTTTGCCATTA

>hsamiR570\_3p  
CGAAAACAGCAATTACCTTTGC  
>MADE1  
CGAAAACAGCAATTA  
>TAOK1  
CGAAAACAGCAATTA

>hsamiR1277\_5p  
AAATATATATATATATGTACGTAT  
>EnSpm-8\_HM  
TATATATATATGTACGTATGTGTATATAAATGTATA  
>ZBED3  
TATATATATATGTATATATGTATATATATATGTATATATGTA

>hsamiR1277\_5p  
AAATATATATATATATGTACGTAT  
>EnSpm-8\_HM  
ATATATATATATGTACGTATGTGTATATAAATGTATACGTAGATATATATGTAT  
>ZBED3  
ATATATATGTATATGTATATATGTATATATATATGTATATATGTATATATATATGTATATATGTA

>hsamiR1277\_5p  
AAATATATATATATATGTACGTAT  
>EnSpm-8\_HM  
ATATATATATATATGTACGTATGTGTATATA  
>SENP1  
ATATATATATATATATGTATGTGTATATATATATGTA

>hsamiR1277\_5p  
AAATATATATATATATGTACGTAT  
>EnSpm-8\_HM  
ATATATATATATATGTA  
>MIPOL1  
ATATATATATATATGTA

>hsamiR1277\_5p  
AAATATATATATATATGTACGTAT  
>EnSpm-8\_HM  
ATATATATATATATGTA  
>CSRNP3  
ATATATATATATATGTA

>hsamiR1277\_5p  
AAATATATATATATATGTACGTAT  
>EnSpm-8\_HM  
ATATATATATATATGTA  
>EFHC1  
ATATATATATATATGTA

>hsamiR1277\_5p  
AAATATATATATATATGTACGTAT  
>EnSpm-8\_HM  
ATATATATATATATGTA  
>MAP3K12  
ATATATATATATATGTA

>hsamiR1277\_5p  
AAATATATATATATATGTACGTAT  
>EnSpm-8\_HM  
ATATATATATATATGTA  
>RABGAP1  
ATATATATATATATGTA

>hsamiR1277\_5p  
AAATATATATATATATGTACGTAT  
>EnSpm-8\_HM  
ATATATATATATATGTA  
>TACR3  
ATATATATATATATGTA

>hsamiR1277\_5p  
AAATATATATATATATGTACGTAT  
>EnSpm-8\_HM  
ATATATATATATATGTA  
>TET2  
ATATATATATATATGTA

>hsamiR1277\_5p  
AAATATATATATATATGTACGTAT  
>EnSpm-8\_HM  
ATATATATATATATGTA  
>SRP72  
ATATATATATATATGTA



>hsamiR1277\_5p  
AAATATATATATATATGTACGTAT  
>EnSpm-8\_HM  
ATATATATATATATGTA  
>ZNF608  
ATATATATATATATGTA

>hsamiR1277\_5p  
AAATATATATATATATGTACGTAT  
>EnSpm-8\_HM  
ATATATATATATATGTA  
>DYNC1LI1  
ATATATATATATATGTA

>hsamiR1277\_5p  
AAATATATATATATATGTACGTAT  
>EnSpm-8\_HM  
ATATATATATATATGTA  
>RTN4RL1  
ATATATATATATATGTA

>hsamiR1277\_5p  
AAATATATATATATATGTACGTAT  
>EnSpm-8\_HM  
ATATATATATATATGTA  
>AHCYL2  
ATATATATATATATGTA

>hsamiR1277\_5p  
AAATATATATATATATGTACGTAT  
>EnSpm-8\_HM  
ATATATATATATATGTA  
>PRIMA1  
ATATATATATATATGTA

>hsamiR1277\_5p  
AAATATATATATATATGTACGTAT  
>EnSpm-8\_HM  
ATATATATATATATGTA  
>MLLT3  
ATATATATATATATGTA

>hsamiR1277\_5p  
AAATATATATATATATGTACGTAT  
>EnSpm-8\_HM  
ATATATATATATATGTA  
>NRF1  
ATATATATATATATGTA

>hsamiR1277\_5p  
AAATATATATATATATGTACGTAT  
>EnSpm-8\_HM  
ATATATATATATATGTA  
>CREBZF  
ATATATATATATATGTA

>hsamiR1277\_5p  
AAATATATATATATATGTACGTAT  
>EnSpm-8\_HM  
ATATATATATATATGTA  
>MMP16  
ATATATATATATATGTA

>hsamiR1277\_5p  
AAATATATATATATATGTACGTAT  
>EnSpm-8\_HM  
ATATATATATATATGTA  
>MBNL3  
ATATATATATATATGTA

>hsamiR1277\_5p  
AAATATATATATATATGTACGTAT  
>EnSpm-8\_HM  
ATATATATATATATGTA  
>YAF2  
ATATATATATATATGTA

>hsamiR1277\_5p  
AAATATATATATATATGTACGTAT  
>EnSpm-8\_HM  
ATATATATATATATGTA  
>ARHGEF11  
ATATATATATATATGTA

>hsamiR1277\_5p  
AAATATATATATATATGTACGTAT  
>EnSpm-8\_HM  
ATATATATATATATGTA  
>HS2ST1  
ATATATATATATATGTA

>hsamiR1277\_5p  
AAATATATATATATATGTACGTAT  
>EnSpm-8\_HM  
ATATATATATATATGTA  
>ARHGEF11  
TATATATATATATATGTA

>hsamiR1277\_5p  
AAATATATATATATATGTACGTAT  
>EnSpm-8\_HM  
ATATATATATATATGTA  
>EFHC1  
ATATATATATATATGTA

>hsamiR1277\_5p  
AAATATATATATATATGTACGTAT  
>EnSpm-8\_HM  
ATATATATATATATGTA  
>EFHC1  
ATATATATATATATATGTA

>hsamiR1277\_5p  
AAATATATATATATATGTACGTAT  
>EnSpm-8\_HM  
ATATATATATATATGTA  
>EFHC1  
AAATATATATATATATATATGTA

>hsamiR1277\_5p  
AAATATATATATATATGTACGTAT  
>EnSpm-8\_HM  
AATATATATATATATGTA  
>ZIC5  
AATATATATATATATGTA

>hsamiR1277\_5p  
AAATATATATATATATGTACGTAT  
>EnSpm-8\_HM  
AAATATATATATATATGTA  
>ZBTB44  
AAATATATATATATATGTA

>hsamiR1277\_5p  
AAATATATATATATATGTACGTAT  
>EnSpm-8\_HM  
AAATATATATATATATGTA  
>TBCEL  
AAATATATATATATATGTA

>hsamiR1277\_5p  
AAATATATATATATATGTACGTAT  
>EnSpm-8\_HM  
AAATATATATATATATGTA  
>IKZF4  
AAATATATATATATATGTA

>hsamiR1277\_5p  
AAATATATATATATATGTACGTAT  
>EnSpm-8\_HM  
AAATATATATATATATGTA  
>KIAA2018  
AAATATATATATATATGTA

>hsamiR1277\_5p  
AAATATATATATATATGTACGTAT  
>EnSpm-8\_HM  
AAATATATATATATATGTA  
>ZBTB44  
GGTCACAAAAATATATATATATATGTA

>hsamir151a\_5p  
TCGAGGAGCTCACAGTCTAGT  
>L2\_Platt1o/MdoRep1\_SINE\_Metatheria  
CTTTTCTGCCCTCGAGGAGCTCACAGTCTAGTA  
>ERO1L  
CTTTTCTGCCCTTAAGGAGCTCACATTCTAGTA

>hsamir151a\_5p  
TCGAGGAGCTCACAGTCTAGT  
>L2\_Platt1o/MdoRep1\_SINE\_Metatheria  
CCTGCCCTCGAGGAGCTCACAGTCTAGTA  
>GRIA4  
CCTGCCCTCAAGGAGCTTACAGTCTAGTA

>hsamir151a\_5p  
TCGAGGAGCTCACAGTCTAGT  
>L2\_Platt1o/MdoRep1\_SINE\_Metatheria  
GAGCTCACAGTCTAGTA  
>TTC17  
GAGCTCACAGTCTAGTA

>hsamir151a\_5p  
TCGAGGAGCTCACAGTCTAGT  
>L2\_Platt1o/MdoRep1\_SINE\_Metatheria  
CCTGCCCTCGAGGAGCTCACAGTCTAGTA  
>LYPD3  
CCTGCCCTCGAGGAGCTCACAGTCTAGTA

>hsamiR708\_5p  
AAGGAGCTTACAATCTAGCTGGG  
>L2\_Platt1r  
TGCCCTCAAGGAGCTTACAATCTA  
>TEX261  
TGCCCTCAAGGAGCTTACAGTCTA

>hsamiR28\_5p  
AAGGAGCTCACAGTCTATTGAG  
>L2\_Platt1o  
TGCCCTCAAGGAGCTCACAGTCTA  
>DCAF10  
TGCCCTCAAGGAGCTTACAGTCTA

>hsamiR28\_5p  
AAGGAGCTCACAGTCTATTGAG  
>L2\_Platt1o  
TCCTTGCCCTCAAGGAGCTCACAGTCTA  
>TEX261  
TCCTTGCCCTCAAGGAGCTTACAGTCTA

>hsamiR28\_5p  
AAGGAGCTCACAGTCTATTGAG  
>L2\_Platt1o  
GTCCTTGCCCTCAAGGAGCTCACAGTCTA  
>GRIA4  
GTCCTTGCCCTCAAGGAGCTTACAGTCTA

>hsamiR28\_5p  
AAGGAGCTCACAGTCTATTGAG  
>L2\_Platt1o  
ATGGTCCTTGCCCTCAAGGAGCTCACAGTCTA  
>MBD2  
ATGGTCCTTGCCCTCATGGAGCTCACAGTCTA

>hsamiR28\_5p  
AAGGAGCTCACAGTCTATTGAG  
>L2\_Platt1o  
TGCCCTCAAGGAGCTCACAGTCTA  
>LPPR5.1  
TGCCCTCGAGGAGCTCACAGTCTA

>hsamiR28\_5p  
AAGGAGCTCACAGTCTATTGAG  
>L2\_Platt1o  
GGTCCTTGCCCTCAAGGAGCTCACAGTCTA  
>LYPD3  
GGTCCTTGCCCTCGAGGAGCTCACAGTCTA

>hsamiR28\_5p  
AAGGAGCTCACAGTCTATTGAG  
>L2\_Platt1o  
GGTCCTTGCCCTCAAGGAGCTCACAGTCTA  
>N4BP1  
GGTCCTGCCCACGAGGAGCTCACAGTCTA

>hsamiR28\_5p  
AAGGAGCTCACAGTCTATTGAG  
>L2\_Platt1o  
CCCTCAAGGAGCTCACAGTCTA  
>E2F6  
CCCTCAAGGAGCTCACAGTCTA

>hsamir151a\_5p  
TCGAGGAGCTCACAGTCTAGT  
>L2\_Platt1o/MdoRep1\_SINE\_Metatheria  
CCCTCGAGGAGCTCACAGTCTA  
>E2F6  
CCCTCAAGGAGCTCACAGTCTA

>hsamiR28\_5p  
AAGGAGCTCACAGTCTATTGAG  
>L2\_Platt1o  
TGCCCTCAAGGAGCTCACAGTCTA  
>EPC2  
TGCCCTCAAGGAGCTCACAGTCTA

>hsamir151a\_5p  
TCGAGGAGCTCACAGTCTAGT  
>L2\_Platt1o/MdoRep1\_SINE\_Metatheria  
TTCCTGCCCTCGAGGAGCTCACAGTCTA  
>EPC2  
TTCCTGCCCTCAAGGAGCTCACAGTCTA

>hsamiR28\_5p  
AAGGAGCTCACAGTCTATTGAG  
>L2\_Platt1o  
GTCCTTGCCCTCAAGGAGCTCACAGTCTA  
>ATPAF1  
GTCCTTGCCCTCAAGGAGCTCACAGTCTA

>hsamiR1285\_3p  
TCTGGGCAACAAAGTGAGACCT  
>AluJb  
GTGGCTCATGCCTGTAATCCCAGCACTTTGGGAGGCCGAGGCAGGCGGATGACCTGAGGTCAGGAATTCGAGAC  
CAGCCTGGCCAATATGGTGAAACCCCATCTCTA  
>EEF2K  
GTGGCTCCTGCCTGTAATCCCAGCGCTTTGGGAGACTGAGGCGGGAGGCTCACTTAAGTCCAGGAGTTCGAGACC  
AGCCTGGGCAACACAGTGAGACCCCATCTCTA

>hsamiR708\_5p  
AAGGAGCTTACAATCTAGCTGGG  
>L2\_Platt1r  
GCCCTCAAGGAGCTTACAATCTA

>METTL21A  
GCCCTCAAGGAGCTTACTACTCTA

>hsamiR708\_5p  
AAGGAGCTTACAATCTAGCTGGG  
>L2\_Plat1r  
ACTGCCCTCAAGGAGCTTACAATCTA  
>SLC31A1  
ACTGCTCTCCAGGAGCTTACAATCTA

>hsamiR708\_5p  
AAGGAGCTTACAATCTAGCTGGG  
>L2\_Plat1r  
CTGCCCTCAAGGAGCTTACAATCTA  
>DOCK7  
CTGCCCTCAAGGAGCTCACAATCTA

>hsamiR28\_5p  
AAGGAGCTCACAGTCTATTGAG  
>L2\_Plat1o  
GTCCTTGCCCTCAAGGAGCTCACAGTCTA  
>DOCK7  
GTCCTTGCCCTCAAGGAGCTCACAATCTA

>hsamiR548i  
AAAAGTAATTGCGGATTTTGCC  
>MADE1  
GTGCAAAAAGTAATTGCGGATTTTGCCATTAAGTAATGGCAAAAATAGCAATTATTTTGTACCAGCCTA  
>HLA-DMB  
GTGCAAAAAGTAATTGCGGTTTTTGCCACTGAAAGTAATGGCAAAAAGTCAATTACTTTTGCACCAACCTA

>hsamiR548i  
AAAAGTAATTGCGGATTTTGCC  
>MADE1  
TGGTGCAAAAAGTAATTGCGGATTTTGCCATTAAGTAATGGCAAAAATAGCAATTATTTTGTACCAGCCTA  
>HLA-DMB  
TGGTGCAAAAAGTAATTGCGGTTTTTGCCACTGAAAGTAATGGCAAAAAGTCAATTACTTTTGCACCAACCTA

>hsamiR548aa  
AAAAACCACAATTACTTTTGCACCA  
>MADE1  
GGCAAAAACCACAATTACTTTTGCACCAACCTA  
>LRRC55  
GGCAAAAACCGCAATTACTTTTGCACCAACCTA

>hsamiR548h\_3p  
CAAAAACCGCAATTACTTTTGC  
>MADE1

TTAATGACAAAAACCGCAATTACTTTTGCACCAACCTA  
>LRRC55  
TTAATGGCAAAAAACCGCAATTACTTTTGCACCAACCTA

>hsamiR548u  
CAAAGACTGCAATTACTTTTGC  
>MADE1  
TTTTAATGGCAAAGACTGCAATTACTTTTGCGCCAACCTA  
>LRRC55  
TTTTAATGGCAAAAAACCGCAATTACTTTTGCACCAACCTA

>hsamiR548t\_3p  
AAAAACCACAATTACTTTTGCACCA  
>MADE1  
TTTTTAATGACAAAAACCACAATTACTTTTGCACCAACCTA  
>LRRC55  
TTTTTAATGGCAAAAAACCGCAATTACTTTTGCACCAACCTA

>hsamiR548aa  
AAAAACCACAATTACTTTTGCACCA  
>MADE1  
TTTTTGCCATTACTTTCAATGGCAAAAAACCACAATTACTTTTGCACCAACCTA  
>LRRC55  
TTTTTGCTATCATTTTTAATGGCAAAAAACCGCAATTACTTTTGCACCAACCTA

>hsamiR548i  
AAAAGTAATTGCGGATTTTGCC  
>MADE1  
ATGTGTTAGGTTGGTGCAAAAGTAATTGCGGATTTTGCCATACTTTAACGGCAAAAAACCACAAATATTATTGCAC  
CAACCTA  
>CDC27  
ATGTATTAAGTTGGTGCAAAAGTAATTGCAGTTTTGCCATAAAAGTCATGGCAAAAAACCACAATTACTTATGCAC  
CAACCTA

>hsamiR3149  
TTTGTATGGATATGTGTGTGTAT  
>Chapaev\_8\_HM\_Chapaev\_Hydra\_magnipapillata  
TGTGTATGTGTGTGTATA  
>TAOK1  
TGTGTATGTGTGTGTATA

>hsamiR1277\_5p  
AAATATATATATATGTACGTAT  
>EnSpm-8\_HM  
TATATATATATGTACGTATGTGTATATAAATGTATA  
>ZBED3  
TATATATATATGTATATATGTATATATATATGTATA



>hsamiR579  
TTCATTTGGTATAAACCGCGATT  
>MADE1  
AAATTCATTTGGTATA  
>METTL21D  
AAATTCATTTGGTATA

>hsamiR1277\_5p  
AAATATATATATATATGTACGTAT  
>EnSpm-8\_HM  
ATATATATATATATGTACGTATGTGTATATA  
>GADL1  
ATATATATATATATGTGTGTGTGTGTATATA

>hsamiR1277\_5p  
AAATATATATATATATGTACGTAT  
>EnSpm-8\_HM  
ATATATATATATATGTACGTATGTGTATATA  
>DUSP7  
ATATATATATATATGTATGTGTGTGTATATA

>hsamiR1277\_5p  
AAATATATATATATATGTACGTAT  
>EnSpm-8\_HM  
ATATATATATATATGTACGTATGTGTATATA  
>SENP1  
ATATATATATATATATATGTATGTGTATATA

>hsamiR1277\_5p  
AAATATATATATATATGTACGTAT  
>EnSpm-8\_HM  
ATATATATATATATGTACGTATGTGTATATA  
>ZBED3  
ATATATATATATATATATGTATATGTATATA

>hsamiR1277\_5p  
AAATATATATATATATGTACGTAT  
>EnSpm-8\_HM  
AATATATATATATATGTACGTATGTGTATATA  
>CSMD1  
AATATATATATATATATATGTATGTATATATA

>hsamiR1277\_5p  
AAATATATATATATATGTACGTAT  
>EnSpm-8\_HM  
ATATATATATATGTACGTATGTGTATATA  
>ELF2  
ATATATATATATGTATGTATATATATATA

>hsamiR1277\_5p  
AAATATATATATATATGTACGTAT  
>EnSpm-8\_HM  
ATATATATATATATGTA  
>CREBZF  
ATATATATATATATGTATATATATATATA

>hsamiR1277\_5p  
AAATATATATATATATGTACGTAT  
>EnSpm-8\_HM  
ATATATATATATGTACGTATGTGTATATA  
>ELF2  
ATATATATATATGTATGTATATATATATATATATATATA

>hsamiR1277\_5p  
AAATATATATATATATGTACGTAT  
>EnSpm-8\_HM  
CAAATATATATATATAT  
>GPRASP1  
CAAATATATATATATATA

>hsamiR3673  
ATGGAATGTATATACGGAATA  
>DNA\_2\_12\_DR\_DNA\_transposon\_Danio\_erio  
ATATATATGTGGAATATATATACGGAATATATATATGTGGAATATATA  
>ZNF571  
ATATACATATGGAATATATATATGGAATACATATGTGGAATATATA

>hsamiR548aa  
AAAAACCACAATTACTTTTGCACCA  
>MADE1  
GGCAAAAACCACAATTACTTTTGCACCAACCTAATATA  
>CDC27  
GGCAAAAACCACAATTACTTATGCACCAACCTAATATA

>hsamiR450a\_3p  
ATTGGGGACATTTTGCATTCAT  
>Ginger1\_6\_HM\_Ginger1\_Hydra\_magnipapillata  
CATTTTGCATTCATA  
>TMEM200A  
CATTTTGCATTCATA

>hsamiR548a\_3p  
CAAACTGGCAATTACTTTTGC  
>MADE1  
CAATTACTTTTGCACCAAATA  
>ALG10B  
CAATTACTTTTGCACCTAACCTAATA

>hsamiR548a\_3p  
CAAAACTGGCAATTACTTTTGC  
>MADE1  
TAATGGCAAACTGGCAATTACTTTTGCACCAAACCTAATA  
>SMU1  
TAATGGCAAAAACCGCAATTACTTTTGCCTAACCTAATA

>hsamiR548h\_3p  
CAAAAACCGCAATTACTTTTGC  
>MADE1  
TTAATGACAAAACCGCAATTACTTTTGCACCAACCTAATA  
>SMU1  
TTAATGGCAAAAACCGCAATTACTTTTGCCTAACCTAATA

>hsamiR548u  
CAAAGACTGCAATTACTTTTGC  
>MADE1  
TTACTTTTAATGGCAAAGACTGCAATTACTTTTGCGCCAACCTAATA  
>SMU1  
TTACTTTTAATGGCAAAAACCGCAATTACTTTTGCCTAACCTAATA

>hsamiR548a\_3p  
CAAAACTGGCAATTACTTTTGC  
>MADE1  
CCATTACTTTCAATGGCAAACTGGCAATTACTTTTGCACCAACGTAATA  
>SMU1  
CCATTACTTTTAATGGCAAAAACCGCAATTACTTTTGCCTAACCTAATA

>hsamiR548aa  
AAAAACCACAATTACTTTTGCACCA  
>MADE1  
TGCCATTACTTTTACAGGCAAAAACCACAATTACTTTTGCACCAACCTAATA  
>SMU1  
TGCCATTACTTTTAATGGCAAAAACCGCAATTACTTTTGCCTAACCTAATA

>hsamiR548u  
CAAAGACTGCAATTACTTTTGC  
>MADE1  
TTACTTTTAATGGCAAAGACTGCAATTACTTTTGCGCCAACCTAATA  
>ALG10  
TTACTTTCAATGGCAAAAACCACAATTACTTTTGCCTAACCTAATA

>hsamiR548b\_5p  
AAAAGTAATTGTGGTTTTGGCC  
>MADE1  
AAAAGTAATTGTGGTTTTGGCCTTTATTTTCAATGGCAAGAACCTCAGTTGCTTTTGTGCCAACCTAATA  
>ALG10  
AAAAGTAATTGTGGTTTTGCCATTACTTTTCAATGGCAAAAACCACAATTACTTTTGCCTAACCTAATA

>hsamiR548d\_3p  
CAAAAACCACAGTTTCTTTTGC  
>MADE1  
TTAGGTTGGTGCAAAAGTAATTGTGGTTTTGCCATTGAAAGTAATGGCAAAAACCACAGTTTCTTTTGCACCAACC  
TAATA  
>ALG10B  
TTAGGTTGGTACAAAAGTAATTGTGGTTTTGCCATTACTTTCAATGGCAAAAACCACAATTACTTTTGCCTAACCT  
AATA

>hsamiR548b\_5p  
AAAAGTAATTGTGGTTTTGGCC  
>MADE1  
TTAGGTTGGCGCAAAAGTAATTGTGGTTTTGGCCTTATTTTCAATGGCAAGAACCTCAGTTGCTTTTGTGCCAACC  
TAATA  
>ALG10B  
TTAGGTTGGTACAAAAGTAATTGTGGTTTTGCCATTACTTTCAATGGCAAAAACCACAATTACTTTTGCCTAACCT  
AATA

>hsamiR548d\_5p  
AAAAGTAATTGTGGTTTTGGCC  
>MADE1  
TTAGGTTGGTGCAAAAGTAATTGTGGTTTTGCCATTGAAAGTAATGGCAAAAACCACAGTTTCTTTTGCACCAACC  
TAATA  
>ALG10B  
TTAGGTTGGTACAAAAGTAATTGTGGTTTTGCCATTACTTTCAATGGCAAAAACCACAATTACTTTTGCCTAACCT  
AATA

>hsamiR548u  
CAAAGACTGCAATTACTTTTGC  
>MADE1  
TATTAGGATGGTGCAAAAGTAATGTGGTTTTTTCTTACTTTTAAATGGCAAAGACTGCAATTACTTTTGCGCCAAC  
CTAATA  
>ALG10B  
TATTAGGTTGGTACAAAAGTAATTGTGGTTTTGCCATTACTTTCAATGGCAAAAACCACAATTACTTTTGCCTAAC  
CTAATA

>hsamiR548aa  
AAAAACCACAATTACTTTTGCACCA  
>MADE1  
TTATTAGTCTGGTGCAAAAGAACTGTGGTTTTTTGCCATTACTTTTACAGGCAAAAACCACAATTACTTTTGCACCA  
ACCTAATA  
>ALG10B  
TTATTAGGTTGGTACAAAAGTAATTGTGGTTTTTTGCCATTACTTTCAATGGCAAAAACCACAATTACTTTTGCCTAAC  
CCTAATA

>hsamiR548d\_3p  
CAAAAACCACAGTTTCTTTTGC  
>MADE1

TTAGGTTGGTGCAAAAAGTAATTGTGGTTTTTGCCATTGAAAGTAATGGCAAAAACCACAGTTTCTTTTGACCAACC  
TAATA

>ALG10

TTAGGTTGGTAAAAAGTAATTGTGGTTTTTGCCATTACTTTCAATGGCAAAAACCACAATTACTTTTGACTAACCT  
AATA

>hsamiR548d\_5p

AAAAGTAATTGTGGTTTTTGCC

>MADE1

TTAGGTTGGTGCAAAAAGTAATTGTGGTTTTTGCCATTGAAAGTAATGGCAAAAACCACAGTTTCTTTTGACCAACC  
TAATA

>ALG10

TTAGGTTGGTAAAAAGTAATTGTGGTTTTTGCCATTACTTTCAATGGCAAAAACCACAATTACTTTTGACTAACCT  
AATA

>hsamiR548aa

AAAAACCACAATTACTTTTGACCA

>MADE1

GGCAAAAACCACAATTACTTTTGACCAACCTAATA

>TLR10

GGCAAAAACCACAATTAGTTTTGCACCAACCTAATA

>hsamiR548v

AGCTACAGTTACTTTTGACCA

>MADE1

TTACTTTTGACCCAGCCTAATA

>FAM23B.1

TTACTTTTGACCAACCTAATA

>hsamiR548v

AGCTACAGTTACTTTTGACCA

>MADE1

TTACTTTTGACCCAGCCTAATA

>TMEM236

TTACTTTTGACCAACCTAATA

>hsamiR548v

AGCTACAGTTACTTTTGACCA

>MADE1

TTACTTTTGACCCAGCCTAATA

>ANKRD5

TTACTTTTGACCAACCTAATA

>hsamiR548v

AGCTACAGTTACTTTTGACCA

>MADE1

TTACTTTTGACCCAGCCTAATA

>AL591684.1

TTACTTTTGCACCAACCTAATA

>hsamiR548v

AGCTACAGTTACTTTTGCACCA

>MADE1

TTACTTTTGCACCAGCCTAATA

>AL603965.1

TTACTTTTGCACCAACCTAATA

>hsamiR548a\_3p

CAAACTGGCAATTACTTTTGC

>MADE1

CAATTACTTTTGCACCAAATA

>FAM23B.1

CAATTACTTTTGCACCAACCTAATA

>hsamiR603

CACACTGCAATTACTTTTGC

>MADE1

CAATTACTTTTGTCCAATA

>FAM23B.1

CAATTACTTTTGCACCAACCTAATA

>hsamiR548a\_3p

CAAACTGGCAATTACTTTTGC

>MADE1

CAATTACTTTTGCACCAAATA

>TMEM236

CAATTACTTTTGCACCAACCTAATA

>hsamiR603

CACACTGCAATTACTTTTGC

>MADE1

CAATTACTTTTGTCCAATA

>TMEM236

CAATTACTTTTGCACCAACCTAATA

>hsamiR548a\_3p

CAAACTGGCAATTACTTTTGC

>MADE1

CAATTACTTTTGCACCAACGTAATA

>ANKRD5

CAATTACTTTTGCACCAACCTAATA

>hsamiR603

CACACTGCAATTACTTTTGC

>MADE1

CAATTACTTTTGTCCAATA

>ANKRD5  
CAATTACTTTTGCACCAACCTAATA

>hsamiR548aa  
AAAAACCACAATTACTTTTGCACCA  
>MADE1  
GGCAAAAACCACAATTACTTTTGCACCAACCTAATA  
>FAM23B.1  
GGCAAAAACCTCAATTACTTTTGCACCAACCTAATA

>hsamiR548aa  
AAAAACCACAATTACTTTTGCACCA  
>MADE1  
GGCAAAAACCACAATTACTTTTGCACCAACCTAATA  
>TMEM236  
GGCAAAAACCTCAATTACTTTTGCACCAACCTAATA

>hsamiR548h\_3p  
CAAAAACCGCAATTACTTTTGC  
>MADE1  
AATGACAAAAACCGCAATTACTTTTGCACCAACCTAATA  
>FAM23B.1  
AATGGCAAAAACCTCAATTACTTTTGCACCAACCTAATA

>hsamiR548h\_3p  
CAAAAACCGCAATTACTTTTGC  
>MADE1  
AATGACAAAAACCGCAATTACTTTTGCACCAACCTAATA  
>TMEM236  
AATGGCAAAAACCTCAATTACTTTTGCACCAACCTAATA

>hsamiR548a\_3p  
CAAAACTGGCAATTACTTTTGC  
>MADE1  
ACTTTCAATGGCAAAACTGGCAATTACTTTTGCACCAACGTAATA  
>FAM23B.1  
ACTTTCAATGGCAAAAACCTCAATTACTTTTGCACCAACCTAATA

>hsamiR548a\_3p  
CAAAACTGGCAATTACTTTTGC  
>MADE1  
ACTTTCAATGGCAAAACTGGCAATTACTTTTGCACCAACGTAATA  
>TMEM236  
ACTTTCAATGGCAAAAACCTCAATTACTTTTGCACCAACCTAATA

>hsamiR548a\_3p  
CAAAACTGGCAATTACTTTTGC  
>MADE1

GCAATTACTTTTGCACCAAATA  
>AL591684.1  
GCAATTACTTTTGCACCAACCTAATA

>hsamiR548a\_3p  
CAAACTGGCAATTACTTTTGC  
>MADE1  
GCAATTACTTTTGCACCAAATA  
>AL603965.1  
GCAATTACTTTTGCACCAACCTAATA

>hsamiR548g\_3p  
AAAAGTGAATTACTTTTGTAC  
>MADE1  
AAAAGTGAATTACTTTTGTACCAATA  
>SUMF1  
AAAAGTGAATTACTTTTGCACCAACCTAATA

>hsamiR548f  
AAAAGTGAATTACTTTT  
>MADE1  
CAAAAAGTGAATTACTTTTGGACCAACCTAATA  
>SUMF1  
CAAAAAGTGAATTACTTTTGCACCAACCTAATA

>hsamiR548a\_3p  
CAAACTGGCAATTACTTTTGC  
>MADE1  
AATGGCAAAAAGTGAATTACTTTTGCACCAACGTAATA  
>SUMF1  
AATGGCAAAAAGTGAATTACTTTTGCACCAACCTAATA

>hsamiR603  
CACACTGCAATTACTTTTGC  
>MADE1  
TAATGGCACACTGCAATTACTTTTGTCCAATA  
>SUMF1  
TAATGGCAAAAAGTGAATTACTTTTGCACCAACCTAATA

>hsamiR548f  
AAAAGTGAATTACTTTT  
>MADE1  
TAATGGCAAAAAGTGAATTACTTTTGCACCAACCTAATA  
>SUMF1  
TAATGGCAAAAAGTGAATTACTTTTGCACCAACCTAATA

>hsamiR548f  
AAAAGTGAATTACTTTT



>MADE1  
TAATGGGAAAACTGTAATTACTTTTGTACCAACCTAATA  
>SUMF1  
TAATGGCAAAAACTGCAATTACTTTTGCACCAACCTAATA

>hsamiR548h\_3p  
CAAAAACCGCAATTACTTTTGCA  
>MADE1  
TTAATGACAAAAACCGCAATTACTTTTGCACCAACCTAATA  
>SUMF1  
TTAATGGCAAAAACTGCAATTACTTTTGCACCAACCTAATA

>hsamiR548u  
CAAAGACTGCAATTACTTTTGCG  
>MADE1  
TTTAATGGCAAAGACTGCAATTACTTTTGCGCCAACCTAATA  
>SUMF1  
TTTAATGGCAAAAACTGCAATTACTTTTGCACCAACCTAATA

>hsamiR548u  
CAAAGACTGCAATTACTTTTGCG  
>MADE1  
GGCAAAGACTGCAATTACTTTTGCGCCAACCTAATA  
>AL591684.1  
GGCAAAAACCGCAATTACTTTTGCACCAACCTAATA

>hsamiR548u  
CAAAGACTGCAATTACTTTTGCG  
>MADE1  
GGCAAAGACTGCAATTACTTTTGCGCCAACCTAATA  
>AL603965.1  
GGCAAAAACCGCAATTACTTTTGCACCAACCTAATA

>hsamiR548aa  
AAAAACCACAATTACTTTTGCACCA  
>MADE1  
AGGCAAAAACCACAATTACTTTTGCACCAACCTAATA  
>AL591684.1  
AGGCAAAAACCGCAATTACTTTTGCACCAACCTAATA

>hsamiR548aa  
AAAAACCACAATTACTTTTGCACCA  
>MADE1  
AGGCAAAAACCACAATTACTTTTGCACCAACCTAATA  
>AL603965.1  
AGGCAAAAACCGCAATTACTTTTGCACCAACCTAATA

>hsamiR548h\_3p

CAAAAACCGCAATTACTTTTGCA

>MADE1

CAAAAACCGCAATTACTTTTGCACCAACCTAATA

>ANKRD5

CAAAAACCACAATTACTTTTGCACCAACCTAATA

>hsamiR548aa

AAAAACCACAATTACTTTTGCACCA

>MADE1

GGCAAAAACCACAATTACTTTTGCACCAACCTAATA

>ANKRD5

GGCAAAAACCACAATTACTTTTGCACCAACCTAATA

>hsamiR548u

CAAAGACTGCAATTACTTTTGC

>MADE1

ATGGCAAAGACTGCAATTACTTTTGCGCCAACCTAATA

>ANKRD5

ATGGCAAAAACCACAATTACTTTTGCACCAACCTAATA

>hsamiR548a\_3p

CAAAACTGGCAATTACTTTTGC

>MADE1

GCAAAAGTAATTGGGGTTTTTGGCGTAAAAGTAATGGCAAAACTGGCAATTACTTTTGCACCAAACCTAATA

>ANKRD5

GCAAAAGTAATTGGCGTTTTTGGCTGCAATTAAAGGTTATGGCAAAAACCACAATTACTTTTGCACCAACCTAATA

>hsamiR548d\_5p

AAAAGTAATTGTGGTTTTTGCC

>MADE1

AGGTTGGTGCAAAGTAATTGTGGTTTTTGCCATTGAAAGTAATGGCAAAAACCACAGTTTCTTTTGCACCAACCTAATA

>ANKRD5

AGGTTGGAGCAAAGTAATTGCGGTTTTTGGCTGCAATTAAAGGTTATGGCAAAAACCACAATTACTTTTGCACCAACCTAATA

>hsamiR548d\_3p

CAAAAACCACAGTTTCTTTTGC

>MADE1

AGGTTGGTGCAAAGTAATTGTGGTTTTTGCCATTGAAAGTAATGGCAAAAACCACAGTTTCTTTTGCACCAACCTAATA

>ANKRD5

AGGTTGGAGCAAAGTAATTGCGGTTTTTGGCTGCAATTAAAGGTTATGGCAAAAACCACAATTACTTTTGCACCAACCTAATA

>hsamiR548h\_3p

CAAAAACCGCAATTACTTTTGCA

>MADE1

CAAAAACCGCAATTACTTTTGCACCAACCTAATA

>PGM3

CAAAAACCGCAATTACGTTTGCACCAACCTAATA

>hsamir450b\_5p

TTTTGCAATATGTTTCCTGAATA

>Ginger1\_6\_HM\_Ginger1\_Hydra\_magnipapillata

TTTTGCAATATGTTTCCTGAATA

>TM2D3

TTTTGCAATGTGTTTCCTGAATA

>hsamiR450a\_5p

TTTTGCGATGTGTTTCCTAATAT

>Ginger1\_6\_HM\_Ginger1\_Hydra\_magnipapillata

TTTTGCAATATGTTTCCTGAATA

>TM2D3

TTTTGCAATGTGTTTCCTGAATA

>hsamiR3673

ATGGAATGTATATACGGAATA

>DNA\_2\_12\_DR\_DNA\_transposon\_Danio\_erio

ATATACATATGGAATATATATAT

>ZNF571

ATATACATATGGAATATATATATGGAATA

>hsamiR3673

ATGGAATGTATATACGGAATA

>DNA\_2\_12\_DR\_DNA\_transposon\_Danio\_erio

ATATATATATGGAATATATATA

>ZNF571

ATATACATATGGAATATATATATGGAATA

>hsamiR3673

ATGGAATGTATATACGGAATA

>DNA\_2\_12\_DR\_DNA\_transposon\_Danio\_erio

ATATACATATGGAATATATATATATACGGAATATACATATGGAATATATATATACGGAATATATATATGGAATAT

ATATATATGGAATA

>ZNF571

ATATACATATGGAATATATATATGGAATACATATGTGGAATATATACATATATGGTATATGGAATATATACATATAT

GGAATA

>hsamiR1285\_3p

TCTGGGCAACAAAGTGAGACCT

>AluJb

TGTAATCCCAGCACTTTGGGAGGCCGAGGCAGGCGGATGACCTGAGGTCAGGAATTCGAGACCAGCCTGGCCAA

TATGGTGAAACCCCATCTCTACTAAAAATA

>GRM6

TGTAATCCGAACACTTTGGGAGGTGGAGGCAGGAGGATCGCTCGAGCTCAGAAGTTCGAGACCAGCCTGGGCAA  
CATAGTGAGACCTCGTCTCTACAAAAAATA

>hsamiR574\_5p  
TGAGTGTGTGTGTGTGAGTGTGT  
>hAT-N53\_DR  
GTGTGAGTGTGTGTGTGTGAGTGTGTG  
>NRXN1  
GTGTGTGTGTGTGTGTGTGTGTGTGTGA

>hsamiR574\_5p  
TGAGTGTGTGTGTGTGAGTGTGT  
>hAT-N53\_DR  
GTGTGAGTGTGTGTGTGTGAGTGTGTGT  
>NRXN1  
GTGTGTGTGTGTGTGTGTGTGTGTGTGTGA

>hsamiR574\_5p  
TGAGTGTGTGTGTGTGAGTGTGT  
>hAT-N53\_DR  
GTGTGAGTGTGTGTGTGTGAGTGTGTGT  
>NRXN1  
GTGTGTGTGTGTGTGTGTGTGTGTGTGTGTGA

>hsamiR574\_5p  
TGAGTGTGTGTGTGTGAGTGTGT  
>hAT-N53\_DR

GTGTGAGTGTGTGTGTGTGAGTGTGTGT  
>NRXN1  
GTGTGTGTGTGTGTGTGTGTGTGTGTGTGTGTGTGTGA

>hsamiR340\_5p  
TTATAAAGCAATGAGACTGATT  
>MARN  
ATTATAAAGCAATGA  
>SLC35D3  
ATTATAAAGCAATGA

>hsamiR3686  
ATCTGTAAGAGAAAAGTAAATGA  
>L1MEC\_5\_L1M4\_5\_Eutheria  
TAAGAGAAAAGTAAATGA  
>EIF1AD  
TAAGAGAAAAGTAAATGA

>hsamiR1246  
AATGGATTTTTGGAGCAGG  
>MLT1M  
GAATGGATTTTTGGA  
>KRTAP19-1  
GAATGGATTTTTGGA

>hsamiR302b\_5p  
ACTTTAACATGGAAGTGCTTTC  
>THER1\_SINE\_Mammalia  
TCCCTTCAACTTTAACATGGA  
>AKR1C2  
TCCATTAACCTTTAACATGGA

>hsamiR1972  
TCAGGCCAGGCACAGTGGCTCA  
>AANU01178229.1\_7254x6952\_RF00100\_7SK  
GTGGCTCATGCCTGTAATCCCAGCAATTTGGGAGGCTGAGGCAGGCGGATCACCTGAGGTCAGGAGTTCGAGAC  
CAGCCTGGCCAACATAGTAAAACCTGTCTCTACTAAAAATACAAGAAATTAGCCAGATGTGGTGGCATGCACCTG  
TAATCCCAGCAATTCAGGAGGTTGAGGCAGGAGAAACACTTGAACCCGGGAGGCAGAGATTGC  
>MEFV  
AGGCCGGGCACAGTGGCTCATGCCTGTAATCCCAGCACTTTGGGAGGCTGAGGCGGGTGGATCACCTGAGGTCA  
GGAGTTCGAGACCAGCCTGGCTAACATGGTGAAACCCCGTCTCTACTAAAAATACAAGAAAACAGCCTGGTGT  
GGTGGCACGCACCTGTAATCCCAGCTGCTCAGGAGGCTGAGGCAGGAGAATCGCTTGAACCTGGGAGGTGGAGG  
TTGCAGTGAGCTGAGATCGTGCCACTGCACTCCAGCCTGGGCCACAGAGCAAGATTTGGTCTCAAAAAAAAAAAAA  
AAAAATCATAGTTCATTAATCCAGGTACACAAATACTTCTATCCCAATCCAGTCTGCTTGCCTTCTAGGCTTCC  
CATATCCTCAAGACAGAAGCAGAGAGAAACAGGGGACATATATCCTTGGCGTGGGGTCTGAGGGAAAATGAGG  
GCCAAATCTTCTGTTCCAGGAGCACCTGAGAGTGCCACCCACCAGGGGCGGATTATGCAACGACTCCGTACTTCTC  
CTCTGAAATCCATGGTGTGCATCAGTACATGTCTTCAACCGGATTGACTAACATGTTTCGTTCTAACTTACCTCTGC

TATAATCGGGTAGGCTCCGTGGGCACAGTAACTATTTTGTATTTTTGCATTTCCCATAGCAGCTAGCACCTAGTCG  
GCATTCGGTGACTATTGAGTGTGAATGCAAGATAACAAGGCCAGAAGCAGGAAGAGAGATGCAGTGTTGGGCATT  
CAGTCAGGCCCCTGACCACCCACTGGACAGATAGTCAGAGGAGCTGTGTTCTTCCCTCCATCACGTGTCCCAGGGC  
TGAAGATAGGTTGAAGGGGCCAGAGAAAGAGCAGCTGGCGAATGTATAGATGTGGGA

>hsamiR1972

TCAGGCCAGGCACAGTGGCTCA

>AANU01178229.1\_7254x6952\_RF00100\_7SK

GTGGCTCATGCCTGTAATCCCAGCGATTTGGGAGGCTGAGGCAGGCGGACCACCTGAGGTCAGGAGTTCGAGAC  
CAGCCTGGCCAACATAGTAAAACCCTGTCTCTACTAAAAATAACAAGAAATTAGCCAGATGTGGTGGCACGCAGCT  
GTAATCCCAGCAATTCAGGAGGTTGAGGCAGGAGAAACACTTGAACCCGGGAGGCAGAGATTGC

>MEFV

AGGCCGGGCACAGTGGCTCATGCCTGTAATCCCAGCACTTTGGGAGGCTGAGGCGGGTGGATCACCTGAGGTCA  
GGAGTTCGAGACCAGCCTGGCTAACATGGTGAAACCCCGTCTCTACTAAAAATAACAAGAAAACCAGCCTGGTGT  
GGTGGCACGCACCTGTAATCCCAGCTGCTCAGGAGGCTGAGGCAGGAGAATCGCTTGAACCTGGGAGGTGGAGG  
TTGCAGTGAGCTGAGATCGTGCCACTGCACTCCAGCCTGGGCCACAGAGCAAGATTTGGTCTCAAAAAAAAAAAAA  
AAAAAATCATAGTTCATTAATCCAGGTACACAAATACTTCTATCCCAATCCAGTCTGCTTGCCTTCTCTAGGCTTCC  
CATATCCTCAAGACAGAAGCAGAGAGAACAAGGGGACATATATCCTTGCCGTGGGGTTCTGAGGGAAAATGAGG  
GCCAAATCTTCTGTTTCAGGAGCACCTGAGAGTGCCACCCACCAGGGGCGGATTATGCAACGACTCCGTACTTCTC  
CTCTGAAATCCATGGTGTGTCATCAGTACATGTCTTCAACCGATTGACTAACATGTTTCGTTCTAACTTACCTCTGC  
TATAATCGGGTAGGCTCCGTGGGCACAGTAACTATTTTGTATTTTTGCATTTCCCATAGCAGCTAGCACCTAGTCG  
GCATTCGGTGACTATTGAGTGTGAATGCAAGATAACAAGGCCAGAAGCAGGAAGAGAGATGCAGTGTTGGGCATT  
CAGTCAGGCCCCTGACCACCCACTGGACAGATAGTCAGAGGAGCTGTGTTCTTCCCTCCATCACGTGTCCCAGGGC  
TGAAGATAGGTTGAAGGGGCCAGAGAAAGAGCAGCTGGCGAATGTATAGATGTGGGA

>hsamiR1202

GTGCCAGCTGCAGTGGGGGAG

>MER52A

GTGCCAGCTGCAGTGGGGGA

>CALD1

GTGCCTGCTGCAGTGGGGGA

>hsamiR1246

AATGGATTTTTGGAGCAGG

>MLT1M

TGGATTTTTGGAGCAGGA

>NCOA6

TGGATGTTTGGAGCAGGA

>hsamiR620

ATGGAGATAGATATAGAAAT

>EnSpm\_7\_HM\_EnSpm\_Hydra\_magnipapillata

ATATATATGGAGATAGATATAGA

>MRPL32

ATATATATAGAGATAGATATAGA

>hsamiR620  
ATGGAGATAGATATAGAAAT  
>EnSpm\_7\_HM\_EnSpm\_Hydra\_magnipapillata  
GTATATATATATATATATATATAGATAT  
>MRPL32  
GTATATATATATATATAGAGATAGATATAGA

>hsamiR302e  
TAAGTGCTTCCATGCTT  
>THER1\_SINE\_Mammalia  
TGCTTCCATGCTTCA  
>ADAM28  
TGCTTCCATGCTTCA

>hsamiR1972  
TCAGGCCAGGCACAGTGGCTCA  
>AANU01178229.1\_7254x6952\_RF00100\_7SK  
GTGGCTCATGCCTGTAATCCCAGCAATTTGGGAGGCTGAGGCAGGCGGATCACCTGAGGTCAGGAGTTCGAGAC  
CAGCCTGGCCAACATAGTCAAACCTGTCTCTACTAAAAATACAAGAAATTAGCCAGATGTGGTGCCATGCACCTG  
TAATCCCAGCAATTCAGGAGGTTGAGGCAGGAGAAACACTTGAACCCGGGAGGCAGAGATTGC  
>MEFV  
GTGGCTCATGCCTGTAATCCCTGCACTTTGGGAGGCTGAGGTGGGTGCATCACCTGAGGTCAGGAGTTTGAGACC  
GGCCTGGCCAACATGATGAAACCTCATGTCTACTAAAAATGCAAAAAATTAGCCGGGCATGGTGCGGGCGCCTG  
TAATCCCAGCTACTTCGGAGGCTGAGGCAGGAGAATCTCTTGAACCTGGGAGGCGGAGGTTGCGAGCCAAGATT  
GCACCACTGCACTCCAGCCTGGGTGACAAGAGCAAACTTTGTCTCAAAAAAAAAAAAAAAAAAAGAATCATAGGC  
CGGGCACAGTGGCTCA

>hsamiR1972  
TCAGGCCAGGCACAGTGGCTCA  
>AANU01178229.1\_7254x6952\_RF00100\_7SK  
GTGGCTCATGCCTGTAATCCCAGCGATTTGGGAGGCTGAGGCAGGCGGACCACCTGAGGTCAGGAGTTCGAGAC  
CAGCCTGGCCAACATAGTCAAACCTGTCTCTACTAAAAATACAAGAAATTAGCCAGATGTGGTGCCACGCAGCT  
GTAATCCCAGCAATTCAGGAGGTTGAGGCAGGAGAAACACTTGAACCCGGGAGGCAGAGATTGC  
>MEFV  
GTGGCTCATGCCTGTAATCCCTGCACTTTGGGAGGCTGAGGTGGGTGCATCACCTGAGGTCAGGAGTTTGAGACC  
GGCCTGGCCAACATGATGAAACCTCATGTCTACTAAAAATGCAAAAAATTAGCCGGGCATGGTGCGGGCGCCTG  
TAATCCCAGCTACTTCGGAGGCTGAGGCAGGAGAATCTCTTGAACCTGGGAGGCGGAGGTTGCGAGCCAAGATT  
GCACCACTGCACTCCAGCCTGGGTGACAAGAGCAAACTTTGTCTCAAAAAAAAAAAAAAAAAAAGAATCATAGGC  
CGGGCACAGTGGCTCA

>hsamiR548h\_5p  
AAAAGTAATCGCGTTTTTGTGTC  
>MADE1  
ATTAGGTGGGTGCAAAAGTAATCGCGTTTTTGTGTCATTACTTTAATGGTAAAACTGGAATTACTTTTGTGCA  
>MTMR6  
ATTAGGTTGGTGCAAAAGTAATTGCGGTTTTTGTGTCATCACTTTCAATGGCAAAAGCCCAATTACTTTTGTGCA

>hsamiR1285\_5p  
GATCTCACTTTGTTGCCCAGG  
>AluJ  
GACACAGTCTCACTCTTTTGGCCAGGCTGGAGTGCA  
>ECHDC1  
GACAGAGTCTCACTCTGTTGCCCAGGCTGGAGTGCA

>hsamiR493\_3p  
TGAAGGTCTACTGTGTGCCAGG  
>L2B  
TCTACTGTGTGCCAGGCCCTGTGCCAGGCA  
>DVL3  
TCTACTGTGTGCCAGGCACTGTGCTAGGCA

>hsamiR3934  
TCAGGTGTGGAAACTGAGGCAG  
>MIR  
CCCAGTTTTTCAGGTGTGGAAACTGAGGCA  
>HNF4A  
CCCATTTTTCTGGTGAGGAAACTGAGGCA

>hsamiR1271\_3p  
AGTGCCTGCTATGTGCCAGGCA  
>L2B  
ATTTGTTGAGTGCCTGCTATGTGCCAGGCA  
>MEF2D  
ATTTATTGAGTGCCTACTATGTGCCAGGCA

>hsamiR1271\_3p  
AGTGCCTGCTATGTGCCAGGCA  
>L2B  
AAATATTTGTTGAGTGCCTGCTATGTGCCAGGCA  
>CAPRIN1  
AAATATTTATTGAGTGCCTACTATGTGCCAGGCA

>hsamiR1271\_3p  
AGTGCCTGCTATGTGCCAGGCA  
>L2B  
TATTTGTTGAGTGCCTGCTATGTGCCAGGCA  
>TUBB  
TATTTATTGAGCGCCTACTATGTGCCAGGCA

>hsamiR1255b2\_3p  
AACCACTTTCTTTGCTCATCCA  
>TIGGER1  
CTCAAGAAACCACTTTCTTTGCTCATCCATAAGGAGCA  
>TIGD1L2  
CTCAAGAAACCACTTTGTTTGTCTCATCCAAAAGGAGCA



>hsamiR548c\_5p  
AAAAGTAATTGCGGTTTTTGCC  
>MADE1  
TGGTGCAAAAGTAATTGCGGTTTTTGCCA  
>HLA-DMB  
TGGTGCAAAAGTAATTGCGGTTTTTGCCA

>hsamiR548i  
AAAAGTAATTGCGGATTTTGCC  
>MADE1  
TGGTGCAAAAGTAATTGCGGATTTTGCCA  
>HLA-DMB  
TGGTGCAAAAGTAATTGCGGTTTTTGCCA

>hsamiR548q  
GCTGGTGCAAAAGTAATGGCGG  
>MADE1  
CTGGTGCAAAAGTAATGGCGGTTTTTGCCA  
>HLA-DMB  
CTGGTGCAAAAGTAATGGCGGTTTTTGCCA

>hsamiR1303  
TTTAGAGACGGGGTCTTGCTCT  
>PB1D11  
ATTTTAGAGACGGGGTCTTGCTCTGTTGCCA  
>ALKBH4  
ATTTTAGGGACAGGGTCTTGCTCTGTTGCCA

>hsamiR1267  
CCTGTTGAAGTGTAATCCCCA  
>MSTA  
ATCTCCTGTTGAAGTGTAATCCCCA  
>UGT1A1  
ATCTCATGTTGAATTGTAATCCCCA

>hsamiR1267  
CCTGTTGAAGTGTAATCCCCA  
>MSTA  
CCAAATCTCCTGTTGAAGTGTAATCCCCA  
>CTCF1  
CCAAAGCTCATGTTGAATTGTAATCCCCA

>hsamiR1267  
CCTGTTGAAGTGTAATCCCCA  
>MSTA  
CCCAAATCTCCTGTTGAAGTGTAATCCCCA  
>SLC35A5  
CCCAAATCTCATCTTGAATTGTAATCCCCA



>hsamiR548d\_3p  
CAAAAACCACAGTTTCTTTTGC  
>MADE1  
TTAGGTTGGTGCAAAGTAATTGTGGTTTTGCCTGTAAAAGTAATGGCAAAAACCACAGTTTCTTTTGCACCA  
>KATNAL1  
TTAGGCTGGTGCAAAGTAATTGCGGTTTTGCCATTGAAAGTAATGGAAAAACCACAATTACTTTTGCACCA

>hsamiR548d\_5p  
AAAAGTAATTGTGGTTTTGCC  
>MADE1  
AGGTTGGTGCAAAGTAATTGTGGTTTTGCCTGTAAAAGTAATGGCAAAAACCACAGTTTCTTTTGCACCA  
>ANKRD5  
AGGTTGGAGCAAAGTAATTGCGGTTTTGCTGCAATTAAGGTTATGGCAAAAACCACAATTACTTTTGCACCA

>hsamiR548d\_3p  
CAAAAACCACAGTTTCTTTTGC  
>MADE1  
AGGTTGGTGCAAAGTAATTGTGGTTTTGCCTGTAAAAGTAATGGCAAAAACCACAGTTTCTTTTGCACCA  
>ANKRD5  
AGGTTGGAGCAAAGTAATTGCGGTTTTGCTGCAATTAAGGTTATGGCAAAAACCACAATTACTTTTGCACCA

>hsamiR548d\_3p  
CAAAAACCACAGTTTCTTTTGC  
>MADE1  
AAGTAATGGCAAAAACCACAGTTTCTTTTGCACCA  
>TCEANC2  
AAGTAATGGCAAAAACCACAATTACTTTTGCACCA

>hsamiR1273d  
GAACCCATGAGGTTGAGGCTGCAGT  
>AluSq  
GAGACCAGCCTGGCCAACATGTTGAAACCCCATCTCTACTAAAACCACAAAAATTAACCTGGTGGTGTGTTGGGCA  
CCTGTAATCCCAGCTACTCGGTAGGCTGAGGTAGGAGAATCGCTTGAACCCATGAGGTTGAGGCTGCAGTGAGCC  
AAGATCGTGCCACTGCACTTCAGCCTGGGTGACA  
>STYX  
GAGACCAGCCTGGCCAACATGGTGAACCCCATCTCTACTAAAACACTACAAAAATTAGCCAGGCATGGTGGCATGT  
GCCTCTAACCCAGCTACTTGGGAGGCTGAGGCAGGAAAATCACTTGAACCCAGGAGGTGGAGGTTGCAGTGAG  
CCAAGATTGTGCCACTGTACTCCAGCCTGGGTGACA

>hsamiR1273d  
GAACCCATGAGGTTGAGGCTGCAGT  
>AluSq  
GAGACCAGCCTGGCCAACATGTTGAAACCCCATCTCTACTAAAACCACAAAAATTAACCTGGTGGTGTGTTGGGCA  
CCTGTAATCCCAGCTACTCGGTAGGCTGAGGTAGGAGAATCGCTTGAACCCATGAGGTTGAGGCTGCAGTGAGCC  
AAGATCGTGCCACTGCACTTCAGCCTGGGTGACA  
>MRO

GAGACCAGCCTGGCCAACATGGTGAACCCCGTCTCTACTAAAAACACAAAAATTAGCCAGCCATGGTGGCAGGC  
ACCTGTAATCCCAGCTACTCAGGAGGCTGAGACAGGAGAATCGCTTGAACCCAGGAGGTGGAGGTTGCAGTGAG  
CCGAGATCGTGTTCATTGCACTCCAGCCTGGGTGACA

>hsamiR566

GGGCGCCTGTGATCCCAAC

>GarnAlu1

GGCTGGGCACAGTGGCTCATGCCTGTAATCCCAGCACTTTGGGAGGCTGAGACAGGTGGATCACGAGGTCAGGA  
GTTTCGAGACCAGCCTGACCAACATGGAGAAACCCCATCTCTACTAAAAATACAAAAATTAGCTAGGCGTGGTGGC  
GGGCGCCTGTGATCCCAACTACTCAGGAGGCTGGGGCAGCAGAATCGCTTGAACCCGGGAGGCGAAGGTTGCAG  
TGAGCCAAGATCGCGCCATTGCACTCCAGCCTGGGTGACA

>NUDT4

GGCTGGGCATGGTGGCTCATGCCTGTAATCCCAGCACTTTGGGAGGTCGAGGCAGGCGGATCACGAGGTTAGGA  
GTTTGAGACCAGCCTGACCAACATGAAGAAACCTGTCTCTACTAAAAATACAAAATTAGCCAGGCATGGAGGCA  
GGCGCCTGTAATCCCAACTACTCGGGAGGCTGAGGCAGGAGAATCGCTTGAACCCGGGAGGCGGAGGTTGCGGT  
GAGTTGAGATTGTGCCATTGCACTCCAGCCTGGGTGACA

>hsamiR1273d

GAACCCATGAGGTTGAGGCTGCAGT

>AluSq

AGACCAGCCTGGCCAACATGTTGAAACCCCATCTCTACTAAAACCACAAAAATTAACCTGGTGGTGTGTTGGGCAC  
CTGTAATCCCAGCTACTCGGTAGGCTGAGGTAGGAGAATCGCTTGAACCCATGAGGTTGAGGCTGCAGTGAGCCA  
AGATCGTGCCACTGCACTTCAGCCTGGGTGACA

>NLRC3

AGACCAGCCTGATCAACATGGTGAACCCCATCTCTACTAAAAATACAAAATTAGCTGGGTGTGGTGGTGCCTG  
CCTGTAGACCCAACACTTGGGAGGCCGAGGCAGGAGAATCACTGGAACCCATGAGGTAGAGCCTACAGTGAGC  
TGAGATCATGCCACTGCACTCCAGCCTGGGTGACA

>hsamir151a\_3p

CTAGACTGAAGCTCCTTGAGG

>L2\_Plat1o/MdoRep1\_SINE\_Metatheria

GAAGCTCCTTGAGGACA

>MYBPHL

GAAGCTCCTTGAGGACA

>hsamiR1273d

GAACCCATGAGGTTGAGGCTGCAGT

>AluSq

CCTGTAATCCCAGCTACTCGGTAGGCTGAGGTAGGAGAATCGCTTGAACCCATGAGGTTGAGGCTGCAGTGAGCC  
AAGATCGTGCCACTGCACTTCAGCCTGGGTGACA

>SRCIN1

CCTGTAGTCTCAGCTGCTCGGGAGGCTGAGGCACGAGAATCACTTGAACCCAGGAGGCGGAGGCTGCAGTGAGC  
TGAGATCACACCACTGGACTCCAGCCTGGGAGACA

>hsamiR1273a

GGGCGACAAAGCAAGACTCTTTCTT

>AluS

GGGCTTGGTGGCTCACACCTGTAATCCCAGCACTTTGGAAGGCCAAGGTGGGTGGATCACGAGGTCAGGAGTTC  
GAGACCAGCCTGGCCAACATAGTGAAACCCATCTCTACTAAAAATACAAAAATTAGCCGGGCGTGGTGGCGCTCG  
CCTATAATCCCAGCTACTCAGCGGGCTGAGGCAGGAGAATTGCTTGAACCCGGGTGGTGGAGGTTGCAGTGAGC  
CAAGATTGCGCCACTGCACTCCAGCCTGGGCGACAAAGCAAGACTC

>RP11-644F5.10.1

CCAGGCATGGTGGCGCATGCCTGTAGTCCCAGCTACTCGGGAGGCTGAGGCAGGAGAATCGCTTGAACCCCGGG  
GGTGGAAATTGTGGTGGAGCCAAGATCGCGCCACTGCACTCCAGCCTGGGCGACAGAGCAAGACTCCATCTCAAAAA  
ACAAAAACAAACACGTTAAAAATGGGTAAAGAGAAGTAATCTACTTATGGTCACAAAGCTTACATAAGGGTAGA  
CTTCATTGAACCCATGAAGTCTAGCCCTAAACTGTCTCTTCTTAA

>hsamiR603

CACACACTGCAATTACTTTTGC

>MADE1

TGCAATTACTTTTGTCCAACTTAA

>CD38

TGCAATTACTTTTGCACCAACTTAA

>hsamiR548i

AAAAGTAATTGCGGATTTTGCC

>MADE1

TTGGTGCAAAAAGTAATTGCGGATTTTGCCATTAA

>DENND4C

TTGGTACAAAAATAATTGCGGTTTTTGCCATTAA

>hsamiR548i

AAAAGTAATTGCGGATTTTGCC

>MADE1

TATTAGTTGGTGCAAAAAGTAATTGCGGATTTTGCCATTAA

>DENND4C

TATTATGTTGGTACAAAAATAATTGCGGTTTTTGCCATTAA

>hsamiR548i

AAAAGTAATTGCGGATTTTGCC

>MADE1

TATTAGTTTTGTGCAAAAAGTAATTGCGGATTTTGCCATTAA

>DENND4C

TATTATGTTGGTACAAAAATAATTGCGGTTTTTGCCATTAA

>hsamiR548t\_3p

AAAAACCACAATTACTTTTGCACCA

>MADE1

TTTTAATGACAAAAACCACAATTACTTTTGCACCAACCTAA

>SMU1

TTTTAATGGCAAAAACCGCAATTACTTTTGCACCTAACCTAA

>hsamiR548aa

AAAAACCACAATTACTTTTGCACCA

>MADE1

TGCCATTACTTTCAATGGCAAAAACCACAATTACTTTTGCACCAACCTAA  
>SMU1

TGCCATTACTTTTAATGGCAAAAACCGCAATTACTTTTGCACCTAACCTAA

>hsamiR548t\_3p

AAAAACCACAATTACTTTTGCACCA

>MADE1

AATGACAAAAACCACAATTACTTTTGCACCAACCTAA

>ALG10B

AATGGCAAAAACCACAATTACTTTTGCACCTAACCTAA

>hsamiR548t\_3p

AAAAACCACAATTACTTTTGCACCA

>MADE1

AATGACAAAAACCACAATTACTTTTGCACCAACCTAA

>ALG10

AATGGCAAAAACCACAATTACTTTTGCACCTAACCTAA

>hsamiR548aa

AAAAACCACAATTACTTTTGCACCA

>MADE1

TTATTAGGTTGGTGCAAAAAGAACTGTGGTTTTTGCATTACTTTCAATGGCAAAAACCACAATTACTTTTGCACCA  
ACCTAA

>ALG10B

TTATTAGGTTGGTACAAAAGTAATTGTGGTTTTTGCATTACTTTCAATGGCAAAAACCACAATTACTTTTGCACCTAA  
CCTAA

>hsamiR548aa

AAAAACCACAATTACTTTTGCACCA

>MADE1

TTATTAGGTTGGTGCAAAAAGAACTGTGGTTTTTGCATTACTTTCAATGGCAAAAACCACAATTACTTTTGCACCA  
ACCTAA

>ALG10

TTATTAGGTTGGTAAAAAAGTAATTGTGGTTTTTGCATTACTTTCAATGGCAAAAACCACAATTACTTTTGCACCTAA  
CCTAA

>hsamiR548aa

AAAAACCACAATTACTTTTGCACCA

>MADE1

GGCAAAAACCACAATTACTTTTGCACCAACCTAA

>RABL5

GGCAAAAACCACGATTAGTTTTGCACCAACCTAA

>hsamiR548aa

AAAAACCACAATTACTTTTGCACCA

>MADE1

AATGGCAAAAACCACAATTACTTTTGCACCAACCTAA

>RABL5

AATGGCAAAAACCACGATTAGTTTTGCACCAACCTAA

>hsamiR548d\_5p

AAAAGTAATTGTGGTTTTTGCC

>MADE1

TTAGGTTGGTGCAAAAAGTAATTGTGGTTTTGCCATTGAAAGTAATGGCAAAAACCACAGTTTCTTTTGCACCAACC  
TAA

>RABL5

TTAGGTTGGTGCAAAAAGTAATAGTGGCTTTTGCCATTAATAAATAAATAATGGCAAAAACCACGATTAGTTTTGCAC  
CAACCTAA

>hsamiR548t\_3p

AAAAACCACAATTACTTTTGCACCA

>MADE1

AATGACAAAAACCACAATTACTTTTGCACCAACCTAA

>TLR10

AATGGCAAAAACCACAATTAGTTTTGCACCAACCTAA

>hsamiR548aa

AAAAACCACAATTACTTTTGCACCA

>MADE1

TTTCAATGGCAAAAACCACAATTACTTTTGCACCAACCTAA

>TLR10

TTTCAATGGCAAAAACCACAATTAGTTTTGCACCAACCTAA

>hsamiR548t\_3p

AAAAACCACAATTACTTTTGCACCA

>MADE1

TTTTAATGACAAAAACCACAATTACTTTTGCACCAACCTAA

>ARSJ

TTTTAATGGGAAAAACCGCAACTAGTTTTGCACCAACCTAA

>hsamiR548aa

AAAAACCACAATTACTTTTGCACCA

>MADE1

ATTACTTTCAATGGCAAAAACCACAATTACTTTTGCACCAACCTAA

>ARSJ

ATTACTTTAATGGGAAAAACCGCAACTAGTTTTGCACCAACCTAA

>hsamiR548v

AGCTACAGTTACTTTTGCACCA

>MADE1

ACAGTTACTTTTGCACCAGCCTAA

>ZNF154

ACAGTTACTTTTGCACCAACCTAA

>hsamiR548aa

AAAAACCACAATTACTTTTGCACCA

>MADE1  
AAAACCACAATTACTTTTGCACCAACCTAA  
>ZNF154  
AAAACCACAGTTACTTTTGCACCAACCTAA

>hsamiR548t\_3p  
AAAAACCACAATTACTTTTGCACCA  
>MADE1  
AATGACAAAAACCACAATTACTTTTGCACCAACCTAA  
>FAM23B.1  
AATGGCAAAAACCTCAATTACTTTTGCACCAACCTAA

>hsamiR548t\_3p  
AAAAACCACAATTACTTTTGCACCA  
>MADE1  
AATGACAAAAACCACAATTACTTTTGCACCAACCTAA  
>TMEM236  
AATGGCAAAAACCTCAATTACTTTTGCACCAACCTAA

>hsamiR548aa  
AAAAACCACAATTACTTTTGCACCA  
>MADE1  
ACTTTCAATGGCAAAAACCACAATTACTTTTGCACCAACCTAA  
>FAM23B.1  
ACTTTCAATGGCAAAAACCTCAATTACTTTTGCACCAACCTAA

>hsamiR548aa  
AAAAACCACAATTACTTTTGCACCA  
>MADE1  
ACTTTCAATGGCAAAAACCACAATTACTTTTGCACCAACCTAA  
>TMEM236  
ACTTTCAATGGCAAAAACCTCAATTACTTTTGCACCAACCTAA

>hsamiR548f  
AAAAACTGTAATTACTTTT  
>MADE1  
CAAAAACCTGTAATTACTTTTGGACCAACCTAA  
>HLA-DMB  
CAAAAACCTGCAATTACTTTTGCACCAACCTAA

>hsamiR548aa  
AAAAACCACAATTACTTTTGCACCA  
>MADE1  
GGCAAAAACCACAATTACTTTTGCACCAACCTAA  
>HLA-DMB  
GGCAAAAACCTGCAATTACTTTTGCACCAACCTAA

>hsamiR548aa



AAAAACCACAATTACTTTTGCACCA  
>MADE1  
AATGGCAAAAACCACAATTACTTTTGCACCAACCTAA  
>SUMF1  
AATGGCAAAAAGCAATTACTTTTGCACCAACCTAA

>hsamiR548f  
AAAAACTGTAATTACTTTT  
>MADE1  
TAATGGCAAAAAGCAATTACTTTTGCACCAACCTAA  
>HLA-DMB  
TAATGGCAAAAAGCAATTACTTTTGCACCAACCTAA

>hsamiR548h\_3p  
CAAAAACCGCAATTACTTTTGC  
>MADE1  
TAATGACAAAAACCGCAATTACTTTTGCACCAACCTAA  
>HLA-DMB  
TAATGGCAAAAAGCAATTACTTTTGCACCAACCTAA

>hsamiR548t\_3p  
AAAAACCACAATTACTTTTGCACCA  
>MADE1  
TAATGACAAAAACCGCAATTACTTTTGCACCAACCTAA  
>HLA-DMB  
TAATGGCAAAAAGCAATTACTTTTGCACCAACCTAA

>hsamiR548u  
CAAAGACTGCAATTACTTTTGC  
>MADE1  
TAATGGCAAAGACTGCAATTACTTTTGCACCAACCTAA  
>HLA-DMB  
TAATGGCAAAAAGCAATTACTTTTGCACCAACCTAA

>hsamiR548t\_3p  
AAAAACCACAATTACTTTTGCACCA  
>MADE1  
TTTAATGACAAAAACCGCAATTACTTTTGCACCAACCTAA  
>SUMF1  
TTTAATGGCAAAAAGCAATTACTTTTGCACCAACCTAA

>hsamiR548f  
AAAAACTGTAATTACTTTT  
>MADE1  
AAGTAATTGCAAAAAGCAATTACTTTTGCACCAACCTAA  
>HLA-DMB  
AAGTAATGGCAAAAAGCAATTACTTTTGCACCAACCTAA

>hsamiR548f  
AAAAACTGTAATTACTTTT  
>MADE1  
TGCAAAAGTAATCATGTTTTTTCCATTGTAAGTAATGGGAAAAACTGTAATTACTTTTGTACCAACCTAA  
>HLA-DMB  
TGCAAAAGTAATTGCGGTTTTTGCCTGAAAGTAATGGCAAAAACTGCAATTACTTTTGCACCAACCTAA

>hsamiR548a\_3p  
CAAAACTGGCAATTACTTTTGC  
>MADE1  
GTGCAAAAGTAATTGGGGTTTTTGCCTTAAAAGTAATGGCAAAACTGGCAATTACTTTTGCACCAAACCTAA  
>HLA-DMB  
GTGCAAAAGTAATTGCGGTTTTTGCCTGAAAGTAATGGCAAAAACTGCAATTACTTTTGCACCAACCTAA

>hsamiR548d\_5p  
AAAAGTAATTGTGGTTTTTGCCT  
>MADE1  
TGGTGCAAAAGTAATTGTGGTTTTTGCCTTAAAAGTAATGGCAAAAACCCACAGTTTCTTTTGCACCAACCTAA  
>HLA-DMB  
TGGTGCAAAAGTAATTGCGGTTTTTGCCTGAAAGTAATGGCAAAAACTGCAATTACTTTTGCACCAACCTAA

>hsamiR548w  
AAAAGTAACTGCGGTTTTTGCCT  
>MADE1  
TGGTGCAAAAGTAACTGCGGTTTTTGCCTTTCAACATAATGGCAAAACCCACAATTACTTTTGCACCAATCTAA  
>HLA-DMB  
TGGTGCAAAAGTAATTGCGGTTTTTGCCTGAAAGTAATGGCAAAAACTGCAATTACTTTTGCACCAACCTAA

>hsamiR548z  
CAAAAACCGCAATTACTTTTGCCT  
>MADE1  
TGGTGCAAAAGTAATTGAGATTTTTGCTACTGAAAGTAATGGCAAAAACCGCAATTACTTTTGCACCAACCTAA  
>HLA-DMB  
TGGTGCAAAAGTAATTGCGGTTTTTGCCTGAAAGTAATGGCAAAAACTGCAATTACTTTTGCACCAACCTAA

>hsamiR548t\_3p  
AAAAACCACAATTACTTTTGCACCA  
>MADE1  
CAAAAACCACAATTACTTTTGCACCAACCTAA  
>AL591684.1  
CAAAAACCGCAATTACTTTTGCACCAACCTAA

>hsamiR548t\_3p  
AAAAACCACAATTACTTTTGCACCA  
>MADE1  
CAAAAACCACAATTACTTTTGCACCAACCTAA  
>AL603965.1  
CAAAAACCGCAATTACTTTTGCACCAACCTAA

>hsamiR548aa  
AAAAACCACAATTACTTTTGCACCA  
>MADE1  
GGCAAAAACCACAATTACTTTTGCACCAACCTAA  
>AL591684.1  
GGCAAAAACCGCAATTACTTTTGCACCAACCTAA

>hsamiR548aa  
AAAAACCACAATTACTTTTGCACCA  
>MADE1  
GGCAAAAACCACAATTACTTTTGCACCAACCTAA  
>AL603965.1  
GGCAAAAACCGCAATTACTTTTGCACCAACCTAA

>hsamiR548t\_3p  
AAAAACCACAATTACTTTTGCACCA  
>MADE1  
CAAAAACCACAATTACTTTTGCACCAACCTAA  
>ANKRD5  
CAAAAACCACAATTACTTTTGCACCAACCTAA

>hsamiR548aa  
AAAAACCACAATTACTTTTGCACCA  
>MADE1  
ATGGCAAAAACCACAATTACTTTTGCACCAACCTAA  
>ANKRD5  
ATGGCAAAAACCACAATTACTTTTGCACCAACCTAA

>hsamiR548h\_5p  
AAAAGTAATCGCGGTTTTTGGTC  
>MADE1  
AGGTTGGTGCAAAAGTAATCGCGGTTTTTGTCTTAAAGTAATAGCAAAAAGTCAATTACTTTTGCACCAACCTAA  
>ANKRD5  
AGGTTGGAGCAAAAGTAATTGCGGTTTTTGTCTTAAAGGTTATGGCAAAAACCACAATTACTTTTGCACCAACCTAA

>hsamiR548aa  
AAAAACCACAATTACTTTTGCACCA  
>MADE1  
AATGGCAAAAACCACAATTACTTTTGCACCAACCTAA  
>TCEANC2  
AATGGCAAAAACCACAATTACTTTTGCACCAACCTAA

>hsamiR548t\_3p  
AAAAACCACAATTACTTTTGCACCA  
>MADE1  
TAATGACAAAACCACAATTACTTTTGCACCAACCTAA

>TCEANC2  
TAATGGCAAAAACCACAATTACTTTTGCACCAACCTAA

>hsamiR548t\_3p  
AAAAACCACAATTACTTTTGCACCA  
>MADE1  
AATGACAAAAACCACAATTACTTTTGCACCAACCTAA  
>ITSN1  
AATGGCAAAAACCGCAATCACTTTTGCACCAACCTAA

>hsamiR548aa  
AAAAACCACAATTACTTTTGCACCA  
>MADE1  
CAATGGCAAAAACCACAATTACTTTTGCACCAACCTAA  
>ITSN1  
CAATGGCAAAAACCGCAATCACTTTTGCACCAACCTAA

>hsamiR548t\_3p  
AAAAACCACAATTACTTTTGCACCA  
>MADE1  
CAAAAACCACAATTACTTTTGCACCAACCTAA  
>PGM3  
CAAAAACCGCAATTACGTTTGCACCAACCTAA

>hsamiR548aa  
AAAAACCACAATTACTTTTGCACCA  
>MADE1  
GCAAAAACCACAATTACTTTTGCACCAACCTAA  
>PGM3  
GCAAAAACCGCAATTACGTTTGCACCAACCTAA

>hsamiR548t\_3p  
AAAAACCACAATTACTTTTGCACCA  
>MADE1  
CAATTACTTTTGCACCAACCTAA  
>AC103588.1.1  
CAATTACTCTTGCACCAACCTAA

>hsamiR548t\_3p  
AAAAACCACAATTACTTTTGCACCA  
>MADE1  
CAAAAACCACAATTACTTTTGCACCAACCTAA  
>CDC27  
CAAAAACCACAATTACTTATGCACCAACCTAA

>hsamiR548aa  
AAAAACCACAATTACTTTTGCACCA  
>MADE1

ATGGCAAAAACCAACAATTACTTTTGCACCAACCTAA

>CDC27

ATGGCAAAAACCAACAATTACTTATGCACCAACCTAA

>hsamiR548aa

AAAAACCACAATTACTTTTGCACCA

>MADE1

ATTACTTTTACAGGCAAAAACCAACAATTACTTTTGCACCAACCTAATATAA

>ARSJ

ATTACTTTTAATGGGAAAAACCGCAACTAGTTTTGCACCAACCTAATATAA

>hsamiR548u

CAAAGACTGCAATTACTTTTGC

>MADE1

ACTTTTAATGGCAAAGACTGCAATTACTTTTGCGCCAACCTAATAA

>FAM23B.1

ACTTTCAATGGCAAAAACCTCAATTACTTTTGCACCAACCTAATAA

>hsamiR548u

CAAAGACTGCAATTACTTTTGC

>MADE1

ACTTTTAATGGCAAAGACTGCAATTACTTTTGCGCCAACCTAATAA

>TMEM236

ACTTTCAATGGCAAAAACCTCAATTACTTTTGCACCAACCTAATAA

>hsamiR1291

TGGCCCTGACTGAAGACCAGCAGT

>AAYZ01506329.1\_1224x1089\_RF00410\_SNORA2

GTGGCCCTGACTGAA

>RNF123

GTGGCCCTGACTGAA

>hsamiR545\_5p

TCAGTAAATGTTTATTAGATGA

>MIR2\_Repetitive\_sequence\_Mammalia

TAAATGTTTATTAGATGAA

>SNTB2

TAAATGTTTATTAGATGAA

>hsamiR1273a

GGGCGACAAAGCAAGACTCTTTCTT

>AluS

GTGGCTCACACCTGTAATCCCAGCACTTTGGAAGGCCAAGGTGGGTGGATCACGAGGTCAGGAGTTCGAGACCA

GCCTGGCCAACATAGTGAAACCCATCTCTACTAAAAATACAAAAATTAGCCGGGCGTGGTGGCGCTCGCCTATAAT

CCCAGCTACTCAGCGGGCTGAGGCAGGAGAATTGCTTGAACCCGGGTGGTGGAGGTTGCAGTGAGCCAAGATTG

CGCCACTGCACTCCAGCCTGGGCGACAAAGCAAGACTCT

>USP33

TGAGGCAGGAGAATCGCTTGAACCCAGGAGGTGGAGGCTGCAGTGAGCTGAGGTAACACCACAGCACTCCAGCC  
TGGGTGACAAAGCAAGACTCTGTCTCAAAAAAAAAATTACTGAAAGACTTTATGGTAAGTATTTAAACTAAATA  
TACCAACCTGTGGTATATTACACATTTTAATATATTCTTCCATAATGCCCACTAAGAAGAAATAAATGGGATAAATG  
ATGAAAAAAAAATAAGCAAATAAACACGCTTTTAGGAA

>hsamiR378b  
ACTGGACTTGGAGGCAGAA  
>MIRc  
AAAGAGCACTGGACTTGGAGGCAGAA  
>C9orf5  
AAAGAACTCTGGACTTGGAGTCAGAA

>hsamiR378b  
ACTGGACTTGGAGGCAGAA  
>MIRc  
CTAGTGAAAGAGCACTGGACTTGGAGGCAGAA  
>C9orf5  
CTAGTAAAGAACTCTGGACTTGGAGTCAGAA

>hsamiR3118  
TGTGACTGCATTATGAAAATTCT  
>L1PA13\_5  
TATATAATCTCATATTTCTGGATGTTTTGTTTCATTATTTTCTTCTTTTTCCCCATTCTTGTCTGCCTGTTTTATTT  
CAGAAAGCCAGTTTTCAAGCTCTGGGATTCTTCTCTGCTTGGTCTATTCTGCTGGGTGGTCTTGACATGAGATG  
GAGCTGGTGTGACAGTCTCTTAGTCTGCTTGCCTCTCCAGGACCCAGCCTGGCCACACCTGCTTACAGGGCA  
ATCTCAGGTGCCACACACTACAATAATTTTATAATGCAATCACACATAATCACTATGTGACTGCATTATGAAA  
ATTCTTGTAGTGTGCTTTTTCAGCTCTATTCGGTTCGGTTATGTCTTCTTTATACTTGTCTATTTTGTCTGTTAGCTCTAC  
AATGTGTTACAATGATTTTTAGCTCACTTGTATTGCATGACAACATACTTCTTCTCACTCAGTGAACCTTGTCTCCTACG  
CATATCCTGAACCCTGCTTGTATCATTCCAGACAGCTCAGCCTCAGCCCAGTTCTGAACACTTGCTGGAGAGTTGAT  
ACAGTCATTTGGAGGAAAAGAA  
>POTEC  
TATATAATCCCATATTTCTCGGATGTTTTGTTTCATTCCCTTTTATTCTTTTTCCCCATTCTTGTGTTGCCTGTTTTATTT  
CAGAAAGCCAGTTTTCAAGCTCTGGGATTCTTCTCTTCTTGGTCTATTCTGTTAGATGGTCTTGACATGAGATG  
GAGCTGGTCTGACCTCAGCCCTCCCTAGTCTGCTTGCCTCTCCAGGACCCAGCCTGGCCACACCTGCTTACAGG  
GCACTCTCAGGTGCCACACATACTACAATAATTTTATAATGCAATCACACACAATCACCATGTGACTACATTATG  
AAAATTCTTCTAGTGTGATTTTACAGCTCTGTCAGGTGAGTTATTTTCTTCTTTATACTCACTATTTTGTCTGTTAGTTC  
CTGCAATGTTTTACAATGATTTTTAGCTTCTTGTATTGGATTACAACATACTTCTTCTCACTCAATGAACCTTGTCTCCT  
ACCCATATCCTGAACCTGCTTGTATCATTTCAGACATCTCAGCCTCAGCCCAGTTCTGAACACTTGCTGGAGAGTT  
GATGCAGTCATTTGGAGAAAAGAA

>hsamiR3118  
TGTGACTGCATTATGAAAATTCT  
>L1PA13\_5  
TAATCCCATATTTCTCGGATGTTTTGTTTCATTCCCTTTTATTCTTTTTCCCCATTCTTGTGTTGCCTGTTTTATTTT  
AAGCCAGTTTTCCAGTTCTGGGATTCTTCTCTTCTTGGTCTATTCTGTTGGATGGTCTTGACATGAGATGGAGC  
TGGTCTGACCTCAGCCCTCCCTAGTCTGCTTGCCTCTCCAGGACCCAGCCTGGCCACATCTGCTTACAGGGCACT  
CTCAGGTGCCACACATACTACAATAATTTTATAATGCAATCACACACAATCACCGTGTGACTGCATTATGAAAAT

TCTTCTAGTGTGATTTACAGCTCTGTCAGGTCAGTTATTTTCTTCTTTATACTTGCTATTTTGTCTGTTAGTTCCTGCA  
ATGTTTTACAATGATTTTTAGCTTCCTTGATTGGATTACAACATACCTCTTTCACTCAGGGAACTTTGTTCTACCCA  
TATCCTGAACTCTGCTTGATCATTTCAGACATCTCAGCCTCAGCCCAGTTCTGAACACTTGCTGGAGAGTTGATGC  
AGTCATTTGGAGAAAAGAA

>POTEC

TAATCCCATATTTCTCGGATGTTTTGTTTCATTCCCTTTTATTCTTTTTTCCCCATTCTTGTTTGCCTGTTTTATTTCAGA  
AAGCCAGTTTTCAAGCTCTGGGATTCTTTCTCTTCTTGGTCTATTCTGTTAGATGGTCTTGACACATGAGATGGAGC  
TGGTCTGACCTCAGCCCTCCCTAGTCTGCTTGCTCTCCCAGGACCCCAGCCTGGCCACACCTGCTTACAGGGCACT  
CTCAGGTGCCCACACATACTACAATAATATTATAATGCAATCACACACAATCACCATGTGACTACATTATGAAAAT  
TCTTCTAGTGTGATTTACAGCTCTGTCAGGTCAGTTATTTTCTTCTTTATACTCACTATTTTGTCTGTTAGTTCCTGCA  
ATGTTTTACAATGATTTTTAGCTTCCTTGATTGGATTACAACATACTTCTTTCACTCAATGAACTTTGTTCTACCCA  
TATCCTGAACTCTGCTTGATCATTTCAGACATCTCAGCCTCAGCCCAGTTCTGAACACTTGCTGGAGAGTTGATGC  
AGTCATTTGGAGAAAAGAA

>hsamiR3118

TGTGACTGCATTATGAAAATTCT

>L1PA13\_5

TAATCCCATATTTCTCAGATGTTTTGTTTCATTCCCTTTTATTCTTTTTTCCCCATTCTTGTTTGCCTGTTTTATTTCAGA  
AAGCCAGTTTTCCAGTTCTGGGATTCTTTCTCTTCTTGGTCTATTCTGTTGGATGGTCTTGACACATGAGATGGAGC  
TGGTCTGACCTCAGCCCTCCCTAGTCTGCTTGCTCTCCCAGGACCCCAGCCTGGCCACATCTGCTTACAGGGCACT  
CTCAGGTGCCCACACATACTACAATAATTTTATAATGCAATCACACACAATCACCGTGTGACTGCATTATGAAAAT  
TCTTCTAGTGTGATTTACAGCTCTGTCAGGTCAGTTATTTTCTTCTTTATACTTGCTATTTTGTCTGTTAGTTCCTGCA  
ATGTTTTACAATGATTTTTAGCTTCCTTGATTGGATTACAACATACCTCTTTCACTCAGGGAACTTTGTTCTACCCA  
TATCCTGAACTCTGCTTGATCATTTCAGACATCTCAGCCTCAGCCCAGTTCTGAACACTTGCTGGAGAGTTGATGC  
AGTCATTTGGAGAAAAGAA

>POTEC

TAATCCCATATTTCTCGGATGTTTTGTTTCATTCCCTTTTATTCTTTTTTCCCCATTCTTGTTTGCCTGTTTTATTTCAGA  
AAGCCAGTTTTCAAGCTCTGGGATTCTTTCTCTTCTTGGTCTATTCTGTTAGATGGTCTTGACACATGAGATGGAGC  
TGGTCTGACCTCAGCCCTCCCTAGTCTGCTTGCTCTCCCAGGACCCCAGCCTGGCCACACCTGCTTACAGGGCACT  
CTCAGGTGCCCACACATACTACAATAATATTATAATGCAATCACACACAATCACCATGTGACTACATTATGAAAAT  
TCTTCTAGTGTGATTTACAGCTCTGTCAGGTCAGTTATTTTCTTCTTTATACTCACTATTTTGTCTGTTAGTTCCTGCA  
ATGTTTTACAATGATTTTTAGCTTCCTTGATTGGATTACAACATACTTCTTTCACTCAATGAACTTTGTTCTACCCA  
TATCCTGAACTCTGCTTGATCATTTCAGACATCTCAGCCTCAGCCCAGTTCTGAACACTTGCTGGAGAGTTGATGC  
AGTCATTTGGAGAAAAGAA

>hsamiR548b\_5p

AAAAGTAATTGTGGTTTTGGCC

>MADE1

TTAGGTTGGCGCAAAGTAATTGTGGTTTTGGCCTTTATTTTCAATGGCAA

>MTMR6

TTAGGTTGGTGCAAAGTAATTGCGGTTTTGTCATCACTTTCAATGGCAA

>hsamiR548a\_3p

CAAACTGGCAATTACTTTTGC

>MADE1

CAATTACTTTTGCACCAA

>TCEANC2  
CAATTACTTTTGCACCAA

>hsamiR548a\_3p  
CAAAACTGGCAATTACTTTTGC  
>MADE1  
CAATTACTTTTGCACCAA  
>FAM23B.1  
CAATTACTTTTGCACCAA

>hsamiR548a\_3p  
CAAAACTGGCAATTACTTTTGC  
>MADE1  
CAATTACTTTTGCACCAA  
>TMEM236  
CAATTACTTTTGCACCAA

>hsamiR548a\_3p  
CAAAACTGGCAATTACTTTTGC  
>MADE1  
CAATTACTTTTGCACCAA  
>ANKRD5  
CAATTACTTTTGCACCAA

>hsamiR548a\_3p  
CAAAACTGGCAATTACTTTTGC  
>MADE1  
GCAATTACTTTTGCACCAA  
>LRRC55  
GCAATTACTTTTGCACCAA

>hsamiR548a\_3p  
CAAAACTGGCAATTACTTTTGC  
>MADE1  
GCAATTACTTTTGCACCAA  
>SUMF1  
GCAATTACTTTTGCACCAA

>hsamiR548a\_3p  
CAAAACTGGCAATTACTTTTGC  
>MADE1  
GCAATTACTTTTGCACCAA  
>AL591684.1  
GCAATTACTTTTGCACCAA

>hsamiR548a\_3p  
CAAAACTGGCAATTACTTTTGC  
>MADE1



GCAATTACTTTTGCACCAA  
>AL603965.1  
GCAATTACTTTTGCACCAA

>hsamiR548a\_3p  
CAAACTGGCAATTACTTTTGC  
>MADE1  
CAAACTGGCAATTACTTTTGCACCAA  
>CD38  
CAAACTTGAATTACTTTTGCACCAA

>hsamiR548a\_3p  
CAAACTGGCAATTACTTTTGC  
>MADE1  
GCAAACTGGCAATTACTTTTGCACCAA  
>CD38  
GCAAACTTGAATTACTTTTGCACCAA

>hsamiR548a\_3p  
CAAACTGGCAATTACTTTTGC  
>MADE1  
TGGCAAACTGGCAATTACTTTTGCACCAA  
>CD38  
TGGCAAACTTGAATTACTTTTGCACCAA

>hsamiR548p  
TAGCAAAAAGTGCAGTTACTTT  
>MADE1  
GCAAAAAGTGCAGTTACTTTTGCACCAA  
>HLA-DMB  
GCAAAAAGTGCATTACTTTTGCACCAA

>hsamiR548p  
TAGCAAAAAGTGCAGTTACTTT  
>MADE1  
GCAAAAAGTGCAGTTACTTTTGCACCAA  
>SUMF1  
GCAAAAAGTGCATTACTTTTGCACCAA

>hsamiR548a\_3p  
CAAACTGGCAATTACTTTTGC  
>MADE1  
TGGTGCAAAAGTAATTGTGATTTTGCATTAAAAGTAACGACAAAAGTGGCAATTACTTTTGCACCAA  
>HLA-DMB  
TGGTGCAAAAGTAATTGCGGTTTTTGCCTGAAAGTAATGGCAAAAAGTGCATTACTTTTGCACCAA

>hsamiR548a\_3p  
CAAACTGGCAATTACTTTTGC

>MADE1  
TAATGGCAAAACTGGCAATTACTTTTGCACCAA  
>LRRC55  
TAATGGCAAAAACCGCAATTACTTTTGCACCAA

>hsamiR548a\_3p  
CAAACTGGCAATTACTTTTGC  
>MADE1  
GTGCAAAAGTAATTGGGGTTTTTGGCGTTAAAAGTAATGGCAAAACTGGCAATTACTTTTGCACCAA  
>KATNAL1  
GTGCAAAAGTAATTGCGGTTTTTGCCATTGAAAGTAATGGAAAAACCACAATTACTTTTGCACCAA

>hsamiR548a\_3p  
CAAACTGGCAATTACTTTTGC  
>MADE1  
TGGTGCAAAAGTAATTGTGATTTTTGCCATTAAGTAACGACAAACTGGCAATTACTTTTGCACCAA  
>KATNAL1  
TGGTGCAAAAGTAATTGCGGTTTTTGCCATTGAAAGTAATGGAAAAACCACAATTACTTTTGCACCAA

>hsamiR548w  
AAAAGTAACTGCGGTTTTTGCCT  
>MADE1  
GTTAGGTTGGTGCAAAAGTAACTGCGGTTTTTGCCTTTCAACATAATGGCAAACCACAATTACTTTTGCACCAA  
>KATNAL1  
GTTAGGCTGGTGCAAAAGTAATTGCGGTTTTTGCCATTGAAAGTAATGGAAAAACCACAATTACTTTTGCACCAA

>hsamiR708\_5p  
AAGGAGCTTACAATCTAGCTGGG  
>L2\_Plat1r  
CTGCCCTCAAGGAGCTTACAA  
>RAB2B  
CTGCTCTCAAGGAGCTTACAA

>hsamiR1285\_3p  
TCTGGGCAACAAAGTGAGACCT  
>AluJ  
CTGGGCAACAAAGTGAGACCTTATCTCTACAA  
>FAM175A  
CTGGGCAACAAAGTGAGAACCTGTCTCTACAA

>hsamiR544b  
ACCTGAGGTTGTGCATTTCTAA  
>MER5A1  
TTGTGCATTTCTAACAA  
>MFN1  
TTGTGCATTTCTAACAA

>hsamiR548h\_5p

AAAAGTAATCGCGGTTTTTGTGTC

>MADE1

TGGTGCAAAAAGTAATCGCGGTTTTTGTGTCATTGAAAGTAATAGCAAAAAGTCAATTACTTTTGCACCAACCTAAA

>HLA-DMB

TGGTGCAAAAAGTAATTGCGGTTTTTGGCCACTGAAAGTAATGGCAAAAAGTCAATTACTTTTGCACCAACCTAAA

>hsamiR548h\_5p

AAAAGTAATCGCGGTTTTTGTGTC

>MADE1

ATTAGGTTGGTGCAAAAAGTAATCGCGGTTTTTGTGTCATTGAAA

>WDHD1

ATTAGGTTGGCACAAAAGAAATCGCGGTTTTTGGCCACTGAAA

>hsamiR1268a

CGGGCGTGGTGGTGGGGG

>AluYc2\_Repetitive\_sequence\_Homo\_sapiens

AAAAGTTAGCCGGGCGTGGTGGTGGGGGCCTGTGGTCCCAGCTACTTTGGAGGCTGAGGTGGAAGGATCACCTG

AGCCCAGGAGGTGGAGGCTGCAGTAAGCTTAGATTGCAGCACTGCGGTCCAGCCTGGGTGACAGAGTGAGACCC

CATCTCAAA

>GMEB1

AAAAATTACCCGGGCGTGGTGGTGGGAGCCTGTAATCCCAGCTACTCAGGAGGCTGAGGCAGGAGAATCACTTG

AACCAAGGAGGCGGAGGTTGCAGTGAGCTGAGATCACACCATTGCACTCCAGCCTGGGCTACAGAGCAAGACTC

CATCTCAAA

>hsamiR720

TCTCGCTGGGGCCTCCA

>HERV571

CTCGCTGGGGCCTCCAAA

>C3orf32

CTCCCTGGGGCCTCCAAA

>hsamiR376a\_3p

ATCATAGAGGAAAATCCACGT

>CER15\_I\_CE\_LTR\_Retrotransposon\_Caenorhabditis\_elegans

AATCATAGAGGAAAA

>SKA2

AATCATAGAGGAAAA

>hsamir376b

ATCATAGAGGAAAATCCATGTT

>CER15\_I\_CE\_LTR\_Retrotransposon\_Caenorhabditis\_elegans

AATCATAGAGGAAAA

>SKA2

AATCATAGAGGAAAA

>hsamiR548j

AAAAGTAATTGCGGTCTTTGGT

>MADE1

TGGTGCAAAAAGTAATTGCGGTCTTTGGTATTACTTTTCAGTGGCAAAA  
>MTMR6

TGGTGCAAAAAGTAATTGCGGTTTTTGTTCATCACTTTCAATGGCAAAA

>hsamiR548i

AAAAGTAATTGCGGATTTTGCC

>MADE1

TTAGGTTGGTGCAAAAAGTAATTGCGGATTTTGCCATACTTTTAACGGCAAAA

>MTMR6

TTAGGTTGGTGCAAAAAGTAATTGCGGTTTTTGTTCATCACTTTCAATGGCAAAA

>hsamiR548g\_5p

TGCAAAAAGTAATTGCAGTTTTTG

>MADE1

TATTAGATTAGTGCAAAAAGTAATTGCAGTTTTTGCATTACGTTCTATGGCAAAA

>MTMR6

TATTAGGTTGGTGCAAAAAGTAATTGCGGTTTTTGTTCATCACTTTCAATGGCAAAA

>hsamiR548i

AAAAGTAATTGCGGATTTTGCC

>MADE1

GTGCAAAAAGTAATTGCGGATTTTGCCATTAAGTAATGGCAAAA

>KATNAL1

GTGCAAAAAGTAATTGCGGTTTTTGCATTGAAAGTAATGGAAAAA

>hsamiR548i

AAAAGTAATTGCGGATTTTGCC

>MADE1

TGGTGCAAAAAGTAATTGCGGATTTTGCCATTAAGTAATGGCAAAA

>KATNAL1

TGGTGCAAAAAGTAATTGCGGTTTTTGCATTGAAAGTAATGGAAAAA

>hsamiR548i

AAAAGTAATTGCGGATTTTGCC

>MADE1

TTAGGTTGGTGCAAAAAGTAATTGCGGATTTTGCCATTAAGTAATGGCAAAA

>KATNAL1

TTAGGCTGGTGCAAAAAGTAATTGCGGTTTTTGCATTGAAAGTAATGGAAAAA

>hsamiR548i

AAAAGTAATTGCGGATTTTGCC

>MADE1

TTGGTGCAAAAAGTAATTGCGGATTTTGCCATTAAGTAATGGCAAAA

>CDC27

TTGGTGCAAAAAGTAATTGCAGTTTTTGCATAAAGTCATGGCAAAA

>hsamiR548i

AAAAGTAATTGCGGATTTTGCC

>MADE1  
TATTAGTTGGTGCAAAAGTAATTGCGGATTTTGCATTAAAAGTAATGGCAAAAA  
>CDC27  
TATTAAGTTGGTGCAAAAGTAATTGCAGGTTTTGCCATAAAAGTCATGGCAAAAA

>hsamiR548i  
AAAAGTAATTGCGGATTTTGCC  
>MADE1  
TATTAGTTTGTGCAAAAGTAATTGCGGATTTTGCATTAAAAGTAATGGCAAAAA  
>CDC27  
TATTAAGTTGGTGCAAAAGTAATTGCAGGTTTTGCCATAAAAGTCATGGCAAAAA

>hsamiR566  
GGGCGCCTGTGATCCCAAC  
>GarnAlu1  
GTGGCTCATGCCTGTAATCCCAGCACTTTGGGAGGCTGAGACAGGTGGATCACGAGGTCAGGAGTTCGAGACCA  
GCCTGACCAACATGGAGAAACCCCATCTCTACTAAAAATACAAAATTAGCTAGGCGTGGTGGCGGGCGCCTGTG  
ATCCCACTACTCAGGAGGCTGGGGCAGCAGAATCGCTTGAACCCGGGAGGCGAAGGTTGCAGTGAGCCAAGAT  
CGCGCCATTGCACTCCAGCCTGGGTGACAGAGTGAGACTCCATCTCAAAAAA  
>TBXA2R  
GTGGTTCATGCCTGTGATCCCAGCACTTTGGGAGGCTGAGGCTGGTGAATCACCTGAGGTCAGGAGTTCAAGACC  
AGCCTGGCCAACACGGTGAACCCCGTCTCTACTAAAAATACAAAATTAGCCGGGCGTGGTGGCGCGCGCCTAT  
AGTCCCAGCTACTCAGGAGGCTGAGGCAGGAGAATCGCTTGAACCCGGGAGGTGGAGGTTGCAGTGAGCTGAG  
ATTGCGCCACTGCACTCCAGCCTGGGGGACAGAGCAAGACTCCGTCTAAAAAAA

>hsamiR1273a  
GGGCGACAAAGCAAGACTCTTTCTT  
>AluS  
TTGGCTGGGCTTGGTGGCTCACACCTGTAATCCCAGCACTTTGGAAGGCCAAGGTGGGTGGATCACGAGGTCAGG  
AGTTCGAGACCAGCCTGGCCAACATAGTGAACCCATCTCTACTAAAAATACAAAATTAGCCGGGCGTGGTGGC  
GCTCGCCTATAATCCCAGCTACTCAGCGGGCTGAGGCAGGAGAATTGCTTGAACCCGGGTGGTGGAGGTTGCAGT  
GAGCCAAGATTGCGCCACTGCACTCCAGCCTGGGCGACAAAGCAAGACTCTTCTTGAAAAAACAACAAAAACAA  
CAAAA  
>SAR1B  
TTGGCCGGGCATGGCGGCTCACGCCTGTAATCCCAGCACTTTGGGAGGCTGAGGTGGGCAGATCACGAGGTCAG  
GAGTTCGAGACCAGCCTGGCCAACATAGTGAACCCATCTCTACTAAAAATACAAAATTAGCCGGGCATGGTG  
GTGCGCGCCTGTAGTCCCAGCTACTCAGGAGGCTGAGGCAGGAGAATCACTTGAACCCGGAGGTGGAGGTTGC  
AGTAAGCAGAGATTGTGCCACTGCACTCTAGCCTGGGCAACAAAGCAAGACTCCATCTCAAAAAAACAACAAAA  
AAAAAA

>hsamiR1273d  
GAACCCATGAGGTTGAGGCTGCAGT  
>AluSq  
CCTGTAATCCCAGCTACTCGGTAGGCTGAGGTAGGAGAATCGCTTGAACCCATGAGGTTGAGGCTGCAGTGAGCC  
AAGATCGTGCCACTGCACTTCAGCCTGGGTGACAAGAGCGAACTTCATCTCAAAAAAAAAA  
>PCBD2

CCTGTAATCTCAGCTACTCAGGAGGCTGAGGATGGAGAATCACTTGAACCCAGGAGGTGGAGACTGCAGTGAGC  
CAAGATCGTGCCATTGCACTCCAGCCTGGGCGACAAGAGCGAACTCCATCTCAAAAAAAAAA

>hsamiR1273d

GAACCCATGAGGTTGAGGCTGCAGT

>AluSq

GAGACCAGCCTGGCCAACATGTTGAAACCCCATCTCTACTAAAACCACAAAAATTAACCTGGTGGTGTGTTGGGCA  
CCTGTAATCCCAGCTACTCGGTAGGCTGAGGTAGGAGAATCGCTTGAACCCATGAGGTTGAGGCTGCAGTGAGCC  
AAGATCGTGCCACTGCACTTCAGCCTGGGTGACAAGAGCGAACTTCATCTCAAAAAAAAAA

>MARVELD2

GAGACCAACCTGGCCAACATAGTGAATCCTGTCTCTACTAAAATACAAAAATTAGCTGGGCATGGTGGTGGG  
TGCCTGTAATCCCAGCTACTTGGGAGGCAGAGGCAGGAGAATCGCTTGAACCCAGGAGGCAGAGGCTGCAGTGA  
GCCAAGATCATACCACTGTACTCCAGCCTGGGCAACAAGAGCGAACTCCATCTCAAAAAAAAAA

>hsamiR1273a

GGGCGACAAAGCAAGACTCTTTCTT

>AluS

TGGTGGCTCACACCTGTAATCCCAGCACTTTGGAAGGCCAAGGTGGGTGGATCACGAGGTCAGGAGTTCGAGACC  
AGCCTGGCCAACATAGTGAACCCATCTCTACTAAAAATACAAAAATTAGCCGGGCGTGGTGGCGCTCGCCTATAA  
TCCCAGCTACTCAGCGGGCTGAGGCAGGAGAATTGCTTGAACCCGGGTGGTGGAGGTTGCAGTGAGCCAAGATT  
GCGCCACTGCACTCCAGCCTGGGCGACAAAGCAAGACTCTTTCTTGGAAAAAACAAAAA

>AARSD1

TGGTGGCTCATACATGTAATCCTAGCACTTTGGGAGGCTGAGGTGGGTGGATTACTTGAGGTCAGGAGTTCGAGA  
CCAGCCTGGCCAACATGGTGAACCCCATCTCTGCTAAAATACAAAAATTAGCTGGCCTGGTGGTGCACATCTG  
TAGTCCCATCTACTTGGGAGGCTGAGGCAGGAGAATTGCTTGAACCCAGAAGGTGGAGGTTGCAGTGAACAGAG  
ACTGCACCACTGCACTCCAGCCTGGGCGACAGAGCAAGACTCCATCTCGGAAAAAAAAAAAAAAAAA

>hsamiR1273a

GGGCGACAAAGCAAGACTCTTTCTT

>AluS

GCTCACACCTGTAATCCCAGCACTTTGGAAGGCCAAGGTGGGTGGATCACGAGGTCAGGAGTTCGAGACCAGCCT  
GGCCAACATAGTGAACCCATCTCTACTAAAAATACAAAAATTAGCCGGGCGTGGTGGCGCTCGCCTATAATCCA  
GCTACTCAGCGGGCTGAGGCAGGAGAATTGCTTGAACCCGGGTGGTGGAGGTTGCAGTGAGCCAAGATTGCGCC  
ACTGCACTCCAGCCTGGGCGACAAAGCAAGACTCTTTCTTGGAAAAAACAAAAA

>OTUD3

GCTCACACCCGTAATCCTAGCACTTTGGGAGGCTGAGGCGGGCAGATCACAAGGTCAGGAGTTTGAGACCAGCCT  
GGCTAACATGGTGAACCCCGTCTCTACTAAAATACAAAAATTAGCCAAGCATGGTGGCACACACCTGTAATCCC  
AGCTACTCAGGAGGCTGAGGCAGGAGAATCGCTTGAACCCGGGAGGTGGAGGTTGCAGTGAGCCGAGATTGCC  
CACCACACTCCAGCCTGGGCAACAAGCAAGACTCTGTCTCAAAAAAAAAAAAAAAAAA

>hsamiR566

GGGCGCCTGTGATCCCAAC

>GarnAlu1

GGGCACAGTGGCTCATGCCTGTAATCCCAGCACTTTGGGAGGCTGAGACAGGTGGATCACGAGGTCAGGAGTTC  
GAGACCAGCCTGACCAACATGGAGAAACCCCATCTCTACTAAAATACAAAAATTAGCTAGGCGTGGTGGCGGGC  
GCCTGTGATCCCACTACTCAGGAGGCTGGGGCAGCAGAATCGCTTGAACCCGGGAGGCGAAGGTTGCAGTGAG  
CCAAGATCGCGCCATTGCACTCCAGCCTGGGTGACAGAGTGAGACTCCATCTCAAAAAACAACAACAAAAA

>STK17B  
GGGCGCAGTGGCTCACGCCTGTAATCCCAGCACTTTGGGAGGCCGAGGCGGGTGGATCACTTGAAGTCAGGAGT  
TTGTGACCAGCCTGGCCAACATGGTGAAACCCCGTCTCTACTAAAAATACAAAAATTAGCTGGGCACGGTGGCAT  
GCGCCTGTAATCCCAACTACTCAGGAGGCTGAGACAGGAGAATTGCTTGAACCCGGGAGGCAGAGGTTGCCGTG  
AGCTGAGATCATGCCACTGCACTCCAGCCTGAGAGACAGAGCAAACTCCATCTCAAAAAAAAAAAAAAAAAAAAA  
A

>hsamiR548q  
GCTGGTGCAAAAAGTAATGGCGG  
>MADE1  
TTAGGTTGGTGAAAAAGTAATCATGCTTTTT  
>SLC6A4  
TTAGGTTAGTGCAAAAAGTAATCATGGTTTTT

>hsamiR548d\_5p  
AAAAGTAATTGTGGTTTTTGCC  
>MADE1  
CAATTACTTTTGCACCAAC  
>CD38  
GCATTTGTTGGAAGAGAATATAAACTACTATTAGTTTGGTATGAAAGGCCTAGAAGGAAAAAGCACATGAATTTT  
GGAGTTGGACAGAGTTGAGTTCAAATTCAGTCTCTAGCTTGATACTAAATGTAGGACTTACGGTAAATTATTAGGT  
TGGTTCAAAAATAATTGTGGTTTT

>hsamiR548d\_5p  
AAAAGTAATTGTGGTTTTTGCC  
>MADE1  
CAATTACTTTTGCACCAACCTAAAT  
>CD38  
GCATTTGTTGGAAGAGAATATAAACTACTATTAGTTTGGTATGAAAGGCCTAGAAGGAAAAAGCACATGAATTTT  
GGAGTTGGACAGAGTTGAGTTCAAATTCAGTCTCTAGCTTGATACTAAATGTAGGACTTACGGTAAATTATTAGGT  
TGGTTCAAAAATAATTGTGGTTTT

>hsamiR548aa  
AAAAACCACAATTACTTTTGCACCA  
>MADE1  
TAATGGCAAAAACCACAGTTTCTTTT  
>NWD1  
TAATGGCGAAAACCACAGTTACTTTT

>hsamiR548d\_5p  
AAAAGTAATTGTGGTTTTTGCC  
>MADE1  
TTATTAGGTTGGTGCAAAAAGAACTGTGGTTTTTGCCATTACTTT  
>NWD1  
TTATTAGGTTGATGCAAAAATTAATTGTGGTTTTTGCCATTACTTT

>hsamiR1277\_5p

AAATATATATATATATGTACGTAT  
>EnSpm-8\_HM  
TTATATACACATACGTACATATATATATATATT  
>PRRC2C  
TTATATATATATATGTATATATATATATATATT

>hsamiR548t\_3p  
AAAAACCACAATTACTTTTGCACCA  
>MADE1  
GCAAAAACCACGATCACTTTTGCACCACCCTAACATTT  
>ALG10  
GCAAAAACCACAATTACTTTTGCACCTAACCTAATATT

>hsamiR548t\_3p  
AAAAACCACAATTACTTTTGCACCA  
>MADE1  
TTAGGTTGGTGCAAAAAGTAATTGTGGTTTTTGTTCATTAATAAATTGCAAAAACCACGATCACTTTTGCACCACCCTAACATTT  
>RABL5  
TTAGGTTGGTGCAAAAAGTAATAGTGGCTTTTGCCATTAATAAATTGCAAAAACCACGATTAGTTTTGCACCAACCTAACATTT

>hsamiR582\_5p  
TTACAGTTGTTCAACCAGTTACT  
>L3  
TTCAGTTGTTCAACCAGTT  
>KHDRBS3  
TTCAGGTGTTCAACCAGTT

>hsamiR548v  
AGCTACAGTTACTTTTGCACCA  
>MADE1  
AAAACCGCAATTACTTTTGTCAAACCTAGTATT  
>SUMF1  
AAAACGCAATTACTTTTGCACCAACCTAATATT

>hsamiR548f  
AAAAACTGTAATTACTTTT  
>MADE1  
GCAAAAATTGCAATTAGGTTTGCACCAACCTAATATT  
>SUMF1  
GCAAAAACTGCAATTACTTTTGCACCAACCTAATATT

>hsamiR548w  
AAAAGTAACTGCGTTTTTGCCT  
>MADE1  
TGGTGCAAAAAGTAATTGTGGTTTTTGCATT  
>KATNAL1



TGGTGCAAAAAGTAATTGCGGTTTTTGCCATT

>hsamiR548i

AAAAGTAATTGCGGATTTTGCC

>MADE1

TAGGCTGGTACAAAAATAATTGCTATTTTGCCATT

>KATNAL1

TAGGCTGGTGCAAAAAGTAATTGCGGTTTTTGCCATT

>hsamiR548h\_5p

AAAAGTAATCGCGGTTTTTGTC

>MADE1

TTAGGTTGGTGCAAAAAGTAATTGCGGTTTTTGTCATT

>KATNAL1

TTAGGCTGGTGCAAAAAGTAATTGCGGTTTTTGCCATT

>hsamiR1285\_3p

TCTGGGCAACAAAGTGAGACCT

>AluJ

TCTCTACAATAATAAAAAAATTAGCTGGGTGTGGTGGCATATGCCTGTAGTCCCAACTACTTGGGAGGCTGAGG

CAGGAGGACTGCCTGAGCCTAGGAG

>ZNF528

CTGGGCAACAGAGTGAGACTCTATCTCCAAAAAAGTCTACTTCTCATCAGTCTTTGCTAAACAGCAGGTA  
CTGCTGTTCAATGGAGAAGGTGGCTACTTTTCTTGCAATTCTACCATATAATCAGACACTAGCAACCTATTA  
CTCTCTCCCACTAATAACCTATGCCTAAGATTACAGCATACTCTATTTTCATGGTCAGTTGGTGGACACTGAAGCTC  
TGTGCACTTATGTCAGGAGAAAGTGTGCTAACTGCAACAGTATGATGACGGTCATCAGTTTTATGTTACTCTGCC  
ACCTCCATGCTCTCTAAATCAGACAATATTTAATCTCAAAGGCAATGTCCTTCATCAGGAAATTGGATAGAAATA  
TCCTCAGCTAATGAAGTCAGCCCTGTCATCCTACTGATTCTTTCCAGGGACCACAGTGAATGGCCTGTATGGAAG  
GCACATGAAAAGATTTGAAAGTCACAAAGAGTAAAGTAGCCTTTCTATAAGCCCCAAATAATTGAATGCTTTATA  
GCCTGAATAAAACTGGTCATTTACAAGCCGTTGCACCTTTGATATACATCAGGTCATGAGATTCAACATATTTGAC  
TTAGCATTATTCTGCATCATGCAATATCATAGATTAGTATCAGAGAACCAGAGACAGAGTTACTTCTGTGTAAATC  
CTATCGTGTCTATAGCAATGGTCCTGAATAATAGCCCAAGTACACACAATTCATCTGTGTGCTTTTCATCTCCACA  
GTGATGTGGTGTATGTCCAGTGATTTGGCAGGCCTTGATAAAGCCTGTGTACATACATTTTATATGATTTCCA  
CTTAGTATGGACTCACTGATGTTGATTAATGCTAGAACTCATGATGATGGTTTTGCCATACAGTTTGTAGGGACTCT  
CATGAATGAACTCTCTGATGCTGTGCAAGGTCAGAATTGTGACTGAAGACCTTACTGCACAGGGTGCATTTGTAAG  
GTTTCTCTCAATGTGAATTCTATGGTGATTGGTGGAGGGAAGACTTCTGAGTGAAGATCTTGCCACATTCTTTACAC  
TCATGAGATTTCTTTTCAGTATGGATTGCAAGATGGCAGTAAGGCCTGAACACCCTCGAAATGCTTTGCCACATTT  
ACTACATCTGTAAGGCCTCTCTCCAGTATGAATTATTTGATGTCTTGTAAGGTATGATGCTTGATTAAGACCTTGC  
CACATTGATTACATTTGTAAGGCTTTTCTCCTGTATGAATTTCTGATGGCATAACCAGTTTGAAGTGGGACTGAAG  
ACCTTGCCACATCTGTTACATTTGTAAGGCTTCTCTCCAGTATGAATTTCTATGATGACTGGTTAGAGAAGACTTGT  
CCTGAAGACTTTGCCACATTCTTTACATTCATAAGGTTTCTCTCCACTATGGATTAGAAAATGGGCAGTAAGGTCTG  
AAAATCTCTAAACGCTGTGCCACATTTATTACATTTGTAAGGCTTCTCATCAGTATGAGTTTTTCGATGTGCTATAA  
GGTCTGATTTCTGACTAAAGATCTTGCCACACTGACTGCATCCATAAGGTCTCTCTTAGTATGAATT

>hsamiR548n

CAAAGTAATTGTGGATTTTGT  
>MADE1  
TATTAGTTGGTGCAAAGTAATTGCGGGTTTTG  
>MTMR6  
TATTAGTTGGTGCAAAGTAATTGCGGGTTTTGT

>hsamiR574\_5p  
TGAGTGTGTGTGTGTGAGTGTGT  
>hAT-N53\_DR  
ACACACACTCACACACACACTCACA  
>CD40LG  
TGTGTGTGTGTGTGTGTGTGTGTGTGT

>hsamiR574\_5p  
TGAGTGTGTGTGTGTGAGTGTGT  
>hAT-N53\_DR  
ACACACACTCACACACACACTCACAC  
>CD40LG  
GTGTGTGTGTGTGTGTGTGTGTGTGT

>hsamiR574\_5p  
TGAGTGTGTGTGTGTGAGTGTGT  
>hAT-N53\_DR  
ACACACACTCACACACACACTCACA  
>CD40LG  
TGTGTGTGTGTGTGTGTGTGTGTGTGT

>hsamiR574\_5p  
TGAGTGTGTGTGTGTGAGTGTGT  
>hAT-N53\_DR  
ACACACACTCACACACACACTCACAC  
>CD40LG  
GTGTGTGTGTGTGTGTGTGTGTGTGT

>hsamiR574\_5p  
TGAGTGTGTGTGTGTGAGTGTGT  
>hAT-N53\_DR  
ACACACACTCACACACACACTCACA  
>CD40LG  
TGTGTGTGTGTGTGTGTGTGTGTGTGT

>hsamiR574\_5p  
TGAGTGTGTGTGTGTGAGTGTGT  
>hAT-N53\_DR  
ACACACACTCACACACACACTCACAC  
>CD40LG  
GTGTGTGTGTGTGTGTGTGTGTGTGT

>hsamiR574\_5p  
TGAGTGTGTGTGTGTGAGTGTGT  
>hAT-N53\_DR  
ACACACACTCACACACACACTCACA  
>CD40LG  
TGTGTGTGTGTGTGTGTGTGTGTGTGTGTGTGT

>hsamiR574\_5p  
TGAGTGTGTGTGTGTGAGTGTGT  
>hAT-N53\_DR  
ACACACACTCACACACACACTCACAC  
>CD40LG  
GTGTGTGTGTGTGTGTGTGTGTGTGTGTGTGTGT

>hsamiR574\_5p  
TGAGTGTGTGTGTGTGAGTGTGT  
>hAT-N53\_DR  
ACACACACTCACACACACACTCACA  
>CD40LG  
TGTGTGTGTGTGTGTGTGTGTGTGTGTGTGTGT

>hsamiR574\_5p  
TGAGTGTGTGTGTGTGAGTGTGT  
>hAT-N53\_DR  
ACACACACTCACACACACACTCACAC  
>CD40LG  
GTGTGTGTGTGTGTGTGTGTGTGTGTGTGTGTGT

>hsamiR574\_5p  
TGAGTGTGTGTGTGTGAGTGTGT  
>hAT-N53\_DR  
ACACACACTCACACACACACTCACA  
>CD40LG  
TGTGTGTGTGTGTGTGTGTGTGTGTGTGTGTGT

>hsamiR574\_5p  
TGAGTGTGTGTGTGTGAGTGTGT  
>hAT-N53\_DR  
ACACACACTCACACACACACTCACAC  
>CD40LG  
GTGTGTGTGTGTGTGTGTGTGTGTGTGTGTGTGT

>hsamiR574\_5p  
TGAGTGTGTGTGTGTGAGTGTGT  
>hAT-N53\_DR  
ACACACACTCACACACACACTCACA  
>CD40LG  
TGTGTGTGTGTGTGTGTGTGTGTGTGTGTGTGT



>hsamiR708\_5p  
AAGGAGCTTACAATCTAGCTGGG  
>L2\_Platt1r  
GTCCCTGCCCTCTAGAAGCTCACAGTCTAGT  
>GRIA4  
GTCCCTGCCCTCAAGGAGCTTACAGTCTAGT

>hsamiR28\_5p  
AAGGAGCTCACAGTCTATTGAG  
>L2\_Platt1o  
CCTGCCCTCCAGGAGCTCACAACTAGT  
>LYPD3  
CCTGCCCTCGAGGAGCTCACAGTCTAGT

>hsamiR28\_5p  
AAGGAGCTCACAGTCTATTGAG  
>L2\_Platt1o  
CCTGCCCTCCAGGAGCTCACA  
>URGCP  
CCTGCCCTCAAGGAGCTCACAGTCT

>hsamiR548h\_3p  
CAAAAACCGCAATTACTTTTGCA  
>MADE1  
CAAAAACCGCGATTACTTTTGACCAACCTAATAGCT  
>ANKRD5  
CAAAAACCACAATTACTTTTGACCAACCTAATAGCT

>hsamiR1255b2\_3p  
AACCCTTTCTTTGCTCATCCA  
>TIGGER1  
AAACCCTTTCTTTGCTCATCCGTAAGAAGCAACTCCT  
>FNNTA  
AAACCCTTTCTTTGCTCATCCATAAGAAGCGACTCCT

>hsamiR1285\_3p  
TCTGGGCAACAAAGTGAGACCT  
>AluJ  
GTGGTGGCTCACACCTGCAATCCCAGCACTTTG  
>KIAA1530  
GTGGTGGCTCATGCCTGTAATCCCAACTTTGGGAGACCGAAGCAGGAGGATCGCTTGAGGCTAGGAGTTCGA  
GATCACCGTGGGCAACACAGTGAGACCT

>hsamiR548d\_3p  
CAAAAACCACAGTTTCTTTTGC  
>MADE1  
AAAACCACAATTACTTTTGACCAACCT  
>NWD1

AAAACCACAGTTACTTTTTGCACCAACCT

>hsamiR548d\_3p

CAAAAACCACAGTTTCTTTTGC

>MADE1

AATGGCAAAAACCACAATTACTTTTTGCACCAACCT

>NWD1

AATGGCGAAAACCACAGTTACTTTTTGCACCAACCT

>hsamiR548aa

AAAAACCACAATTACTTTTTGCACCA

>MADE1

TAATGGCAAAAACCACAGTTTCTTTTGCACCAACCT

>NWD1

TAATGGCGAAAACCACAGTTACTTTTTGCACCAACCT

>hsamiR1285\_3p

TCTGGGCAACAAAGTGAGACCT

>AluJ

CACTCCAGCCTGGGCAAAAGAGTGAGACT

>ZNF528

CACTCCAGCCTGGGCAACAGAGTGAGACT

>hsamiR1285\_3p

TCTGGGCAACAAAGTGAGACCT

>AluJ

ACTCCAGCCTGGGCAAAAGAGTGAGACT

>DCDC5

ACTCCAGACTGGGCAACAGAGTGAGACT

>hsamiR548a\_3p

CAAAACTGGCAATTACTTTTTGC

>MADE1

TTGGTGCAAAAGTAATTGCCAGTTTTGTCGTTACTTTTAATGGCAAAAATCACAATTACTTTTTGCACCAACT

>MTMR6

TTGGTGCAAAAGTAATTGCGGTTTTTGTGCATCACTTTCAATGGCAAAAAGCCCCAATTACTTTTTGCAGCAACT

>hsamiR2054

CTGTAATATAAATTTAATTTATT

>EnSpm2\_SB\_EnSpm\_Sorghum\_bicolor

AGAGAATAAATTAATTTAT

>RASGRP4

AGAGAATAAATTTAATTTAT

>hsamiR3149

TTTGTATGGATATGTGTGTGTAT

>Chapaev\_8\_HM\_Chapaev\_Hydra\_magnipapillata

TATATATATGTATGTGTGTG

>OSBPL9  
TATATATATGTATGTGTGTAT

>hsamiR3149  
TTTGTATGGATATGTGTGTAT  
>Chapaev\_8\_HM\_Chapaev\_Hydra\_magnipapillata  
ATATATATATGTATGTGTGTG  
>DUSP7  
ATATATATATGTATGTGTGTAT

>hsamiR3149  
TTTGTATGGATATGTGTGTAT  
>Chapaev\_8\_HM\_Chapaev\_Hydra\_magnipapillata  
ACATACACACACATATCCATACAAACATATATATATGTATGTGTGTG  
>HDAC2  
ACATACACACACATATATACACATGTATATATATATATGTGTGTAT

>hsamiR1277\_5p  
AAATATATATATATATGTACGTAT  
>EnSpm-8\_HM  
TACATATATATATATAT  
>SRP72  
GTTTATATATATATATAT

>hsamiR1277\_5p  
AAATATATATATATATGTACGTAT  
>EnSpm-8\_HM  
TATACACATACGTACATATATATATATAT  
>CACNA1I  
TATACACATATATATATATATATATATATATAT

>hsamiR1277\_5p  
AAATATATATATATATGTACGTAT  
>EnSpm-8\_HM  
TATACACATACGTACATATATATATATAT  
>CACNA1I  
TATACACATATATATATATATATATATATAT

>hsamiR1277\_5p  
AAATATATATATATATGTACGTAT  
>EnSpm-8\_HM  
TACATATATATATATAT  
>ZBED3  
TACATATATATATATATATATAT

>hsamiR1277\_5p  
AAATATATATATATATGTACGTAT  
>EnSpm-8\_HM

TACATATATATATATAT  
>ZBED3  
TACATATATATATATATAT

>hsamiR1277\_5p  
AAATATATATATATATGTACGTAT  
>EnSpm-8\_HM  
TACATATATATATATAT  
>NRF1  
TACATATATATATATATAT

>hsamiR1277\_5p  
AAATATATATATATATGTACGTAT  
>EnSpm-8\_HM  
TACATATATATATATAT  
>SRP72  
TACATATATATATATATAT

>hsamiR1277\_5p  
AAATATATATATATATGTACGTAT  
>EnSpm-8\_HM  
TACATATATATATATAT  
>ZBED3  
TACATATATATATATATAT

>hsamiR1277\_5p  
AAATATATATATATATGTACGTAT  
>EnSpm-8\_HM  
TACATATATATATATAT  
>PPP4R2  
TACATATATATATATATAT

>hsamiR1277\_5p  
AAATATATATATATATGTACGTAT  
>EnSpm-8\_HM  
ATACGTACATATATATATATAT  
>SENP1  
ATACATACATATATATATATATAT

>hsamiR1277\_5p  
AAATATATATATATATGTACGTAT  
>EnSpm-8\_HM  
TACATATATATATATAT  
>SRP72  
TACATATATATATATAT

>hsamiR1277\_5p  
AAATATATATATATATGTACGTAT



>EnSpm-8\_HM  
TACATATATATATATAT  
>ZBED3  
TACATATATATATATAT

>hsamiR1277\_5p  
AAATATATATATATATGTACGTAT  
>EnSpm-8\_HM  
TACATATATATATATAT  
>NRF1  
TACATATATATATATAT

>hsamiR1277\_5p  
AAATATATATATATATGTACGTAT  
>EnSpm-8\_HM  
TACATATATATATATAT  
>PPP4R2  
TACATATATATATATAT

>hsamiR1277\_5p  
AAATATATATATATATGTACGTAT  
>EnSpm-8\_HM  
TACATATATATATATAT  
>ITPRIPL2  
TACATATATATATATAT

>hsamiR1277\_5p  
AAATATATATATATATGTACGTAT  
>EnSpm-8\_HM  
ATACGTACATATATATATATAT  
>SENP1  
ATACATACATATATATATATAT

>hsamiR620  
ATGGAGATAGATATAGAAAT  
>EnSpm\_7\_HM\_EnSpm\_Hydra\_magnipapillata  
ATATATATGGAGATATCTATATATATATATATAT  
>MRPL32  
ATATATATAGAGATAGATATAGATATATATATAT

>hsamiR548d\_3p  
CAAAAACACAGTTTCTTTTGC  
>MADE1  
TTTTGCCATTACTTTTACAGGCAAAAACCACAATTACTTTTGCACCAACCTAATAT  
>ALG10  
TTTTGCCATTACTTTCAATGGCAAAAACCACAATTACTTTTGCACCAACCTAATAT

>hsamiR548x\_3p

TAAAACTGCAATTACTTTC

>MADE1

GCAAAAAGTCAATTACTTTTGCCTAACCTAATAT

>SUMF1

GCAAAAAGTCAATTACTTTTGCACCAACCTAATAT

>hsamiR548b\_5p

AAAAGTAATTGTGGTTTTGGCC

>MADE1

CAAAAGCAACTGAGGTTCTTGCCATTGAAAATAAAGGCCAAAACCACAATTACTTTTGCGCCAACCTAAATAT

>HLA-DMB

CAAAAGTAATTGCGGTTTTTGCCTGAAAGTAATGGCAAAAAGTCAATTACTTTTGCACCAACCTAAATAT

>hsamiR548h\_5p

AAAAGTAATCGCGGTTTTTGTGTC

>MADE1

AGTATTAGGTTGGTGCAAAGTAATTGCGGTTTTTGTGTCAT

>MTMR6

AGTATTAGGTTGGTGCAAAGTAATTGCGGTTTTTGTGTCAT

>hsamiR548a\_3p

CAAAACTGGCAATTACTTTTGC

>MADE1

AAAAACCCCAATTACTTTTGCACAAACCTAAT

>TCEANC2

AAAAACCACAATTACTTTTGCACCAACCTAAT

>hsamiR548u

CAAAGACTGCAATTACTTTTGC

>MADE1

AAAAACCACATTACTTTTGCACCATCCTAAT

>TCEANC2

AAAAACCACAATTACTTTTGCACCAACCTAAT

>hsamiR548d\_3p

CAAAAACCACAGTTTCTTTTGC

>MADE1

GGCAAAAACCACAATTACTTTTGCACCAACCTAAT

>TCEANC2

GGCAAAAACCACAATTACTTTTGCACCAACCTAAT

>hsamiR548a\_3p

CAAAACTGGCAATTACTTTTGC

>MADE1

TAATGGCAAAAATCACAATTACTTTTGCACCAACTTAAT

>TCEANC2

TAATGGCAAAAACCACAATTACTTTTGCACCAACCTAAT

>hsamiR548a\_3p  
CAAAACTGGCAATTACTTTTGC  
>MADE1  
AAGTAATGGTAAAACCTCGCAATTACTTTTGCACCGACCTAAT  
>TCEANC2  
AAGTAATGGCAAAAACCACAATTACTTTTGCACCAACCTAAT

>hsamiR548h\_3p  
CAAAAACCGCAATTACTTTTGC  
>MADE1  
AAGTAATGACAAAACCGCGATTACTTTTGCACCAACCTAAT  
>TCEANC2  
AAGTAATGGCAAAAACCACAATTACTTTTGCACCAACCTAAT

>hsamiR548aa  
AAAAACCACAATTACTTTTGCACCA  
>MADE1  
AAGTAATGGCAAAAACCACAGTTTCTTTTGCACCAACCTAAT  
>TCEANC2  
AAGTAATGGCAAAAACCACAATTACTTTTGCACCAACCTAAT

>hsamiR548h\_3p  
CAAAAACCGCAATTACTTTTGC  
>MADE1  
AAAGTAATGACAAAACCGCGATTACTTTTGCACCAACCTAAT  
>ITSN1  
AAAGCAATGGCAAAAACCGCAATCACTTTTGCACCAACCTAAT

>hsamiR548aa  
AAAAACCACAATTACTTTTGCACCA  
>MADE1  
TTTGCCATTGAAAGTAATGGCAAAAACCACAGTTTCTTTTGCACCAACCTAAT  
>ITSN1  
TTTGCCATCAAAGCAATGGCAAAAACCGCAATCACTTTTGCACCAACCTAAT

>hsamiR3137  
TCTGTAGCCTGGGAGCAATGGGGT  
>GOLEM  
CCTACAGTGTTTCAGTACAGAAACATGTTGTACAGTTTGTAGCCCAGGAGCA  
>WDR19  
CCTATAGTATTTCAGTACAGTCACATGCTGTACTGGTTTGTAGCCTAGGAGCAAT

>hsamiR548d\_5p  
AAAAGTAATTGTGGTTTTTGC  
>MADE1  
TTATTAGGTTGGTGAAAAGAACTGTGGTTTTTGCATTACTTTCAATGGCAAAAACCACAATTACTTTTGCACCA  
ACCTAAAT  
>CD38

TTATTAGGTTGGTTCAAAATAATTGTGGTTTTGCCATTCCTTCGGTGGCAAACCTTGCAATTACTTTTGCACCAAC  
TTAAAT

>hsamiR548h\_5p  
AAAAGTAATCGCGGTTTTTGTC  
>MADE1  
TGGTGCAAAAGTAATTGCGGTTTTTG  
>HLA-DMB  
TGGTGCAAAAGTAATTGCGGTTTTTG

>hsamiR548g\_5p  
TGCAAAAGTAATTGCAGTTTTTG  
>MADE1  
AGTATTATGTTGGTACAAAAGTAATT  
>MTMR6  
AGTATTAGTTGGTGCAAAAGTAATTGCGGTTTTTG

>hsamiR548h\_5p  
AAAAGTAATCGCGGTTTTTGTC  
>MADE1  
AGGTTGGTGCAAAAGTAATTGCGGTTTTTG  
>ANKRD5  
AGGTTGGAGCAAAAGTAATTGCGGTTTTTG

>hsamiR548g\_5p  
TGCAAAAGTAATTGCAGTTTTTG  
>MADE1  
GTATTATGTTGGTACAAAAGTAATT  
>DENND4C  
GTATTATGTTGGTACAAAATAATTGCGGTTTTTG

>hsamiR548x\_5p  
TGCAAAAGTAATTGCAGTTTTTG  
>MADE1  
AGATTGGTGTGAAAGTAATTGCAGTTTTT  
>MC2R  
AGATTGGTGCAAAAGTAATTGCAATTTTTG

>hsamiR548b\_5p  
AAAAGTAATTGTGGTTTTGGCC  
>MADE1  
CAATTACTTTTGCGCCAACCTAAATATATA  
>CD38  
GCATTTGTTGGAAGAGAATATAAACTACTATTAGTTTGGTATGAAAGGCCTAGAAGGAAAAAGCACATGAATTTT  
GGAGTTGGACAGAGTTGAGTTCAAATTCAGTCTCTAGCTTGATACTAAATGTAGGACTTACGGTAAATTATTAGGT  
TGGTTCAAAAATAATTGTGGTTTTG

>hsamiR548n

CAAAGTAATTGTGGATTTTGT  
>MADE1  
CTATTAGGTTGGTGCAAAGTAAT  
>RABL5  
CTATTAGGTTGGTGCAAAGTAATAGTGGCTTTTG

>hsamiR1277\_5p  
AAATATATATATATATGTACGTAT  
>EnSpm-8\_HM  
ATATATATATATATTTG  
>NTRK3  
ATATATATATATATTTG

>hsamiR1277\_5p  
AAATATATATATATATGTACGTAT  
>EnSpm-8\_HM  
ATATATATATATATTTG  
>BMP2K  
ATATATATATATATTTG

>hsamiR1304\_5p  
TTGAGGCTACAGTGAGATGTG  
>ALU\_SINE1\_7SL\_Primates  
ATCACTTGAGCCCAGGGGTTGAGGCTACAGTGAGATGTG  
>C1orf64  
ATCACTTGAGCCCAGGAGTTTGGAGGCTGCAGTGAGCTGTG

>hsamiR1267  
CCTGTTGAAGTGTAATCCCCA  
>MSTA  
CAAATCTCATGTTGAAATGTAATCCCCAATGCTGGAGGTG  
>CETN3  
CAAATATCATGTTGAATTGTAATCCCCAGTACTGGAGGTG

>hsamiR1277\_5p  
AAATATATATATATATGTACGTAT  
>EnSpm-8\_HM  
TATACACATACGTACATATATATATATAT  
>CACNA1I  
TATACACATATATATATATATATATATATATG

>hsamiR1267  
CCTGTTGAAGTGTAATCCCCA  
>MSTA  
AATCTCATGTTGAAATGTAATCCCCAATG  
>FLVCR1  
AATCTCACATTGAAATGTAATCCCCAATG

>hsamiR1277\_5p  
AAATATATATATATATGTACGTAT  
>EnSpm-8\_HM  
ATATATATATATATTTGGG  
>PAQR3  
ATATATATATATATTTGGG

>hsamiR28\_5p  
AAGGAGCTCACAGTCTATTGAG  
>L2\_Platt1o  
CCTGCCCTCCAGGAGCTCACAATCTAGTGGG  
>LPPR5.1  
CCTGCCCTCGAGGAGCTCACAGTCTAGTGGG

>hsamiR28\_5p  
AAGGAGCTCACAGTCTATTGAG  
>L2\_Platt1o  
GCCCTCCAGGAGCTCACAATCTAGTGGG  
>ATPAF1  
GCCCTCAAGGAGCTCACAGTCTAGTGGG

>hsamiR1285\_3p  
TCTGGGCAACAAAGTGAGACCT  
>AluJ  
TTGAGACCAGCCTGGGCAACAAAGTGAGATCCTATCTCTACAAATAATAAAAAAATTAGCTGGG  
>ORAI2  
TTGAGGCCAGCCTGGGCAACATAGTGAGACCCCATCTCTACAAAAAATACAAACATTAGCTGGG

>hsamiR1304\_3p  
TCTCACTGTAGCCTCGAACCCC  
>ALU\_SINE1\_7SL\_Primates  
ATCACATCTCACTGTAGCCTCAAACCGCTGGGCTCAAGTGTTTCTCCTGCCTTAGCCTCCAGAGTAGCTGGG  
>ZFP42  
ATCACAGCTCACTGTAGCCTCAAACCTCTGGGCTCAAGCTATCCTCCTGCCTCAGCCTCCTGAGTAGCTGGG

>hsamiR1304\_3p  
TCTCACTGTAGCCTCGAACCCC  
>ALU\_SINE1\_7SL\_Primates  
CTCACTGTAGCCTCAAACCGCTGGGCTCAAGTGTTTCTCCTGCCTTAGCCTCCAGAGTAGCTGGG  
>LRCH3  
CTCACTGTAGCCTCAACCTCCAGGCTCAAGTGATCCTCCACCCCAGCCTCCTGAGTAGCTGGG

>hsamiR1304\_3p  
TCTCACTGTAGCCTCGAACCCC  
>ALU\_SINE1\_7SL\_Primates  
CTCACTGTAGCCTCAAACCGCTGGGCTCAAGTGTTTCTCCTGCCTTAGCCTCCAGAGTAGCTGGG  
>C11orf54  
CTCACTGTAGCCTCAAACCTCTGGGCTCAAGTGATTCTCGTGCCTCAGCCTCCTGAGCAGCTGGG

>hsamiR1285\_3p

TCTGGGCAACAAAGTGAGACCT

>AluJ

AGGAGTTTGAGACCAGCCTGGGCAACAAAGTGAGATCCTATCTCTACAAATAATAAAAAAATTAGCTGGGTGTGG  
TGGCATATGCCTGTAGTCCCAACTACTTGGGAGGCTGAGGCAGGAGGACTGCCTGAGCCTAGGAGTTTGCAGCTG  
CACTGAGCTATGATGGTGCCGCTGCACTCCAGCCTGGG

>KIAA1530

AGGAGTTCGAGATCACCGTGGGCAACACAGTGAGACCTCATCTCTACAAAAATTTAAAAAATTAGCCAGGTGTT  
GTGGTGTGTGCCCTGTAGTCCCAGCTACCTGGGAGGCTGACGTGGAAGGATGGCTTGAGCCCAGGAGTTTGAAGC  
TGCACTGAGCTATGATTCTGCCACTGCACTCAGCCTGGG

>hsamiR28\_5p

AAGGAGCTCACAGTCTATTGAG

>L2\_Plat1o

CCTGCCCTCCAGGAGCTCACAATCTAGTGGG

>DOCK7

CCTGCCCTCAAGGAGCTCACAATCTAATGGG

>hsamiR1267

CCTGTTGAAGTGTAATCCCCA

>MSTA

CCAAATCTCATGTTGAAATGTAATCCCCAATGCTGGAGGTGGGG

>CTCFL

CCAAAGCTCATGTTGAATTGTAATCCCCAGTGTTGGAGGTGGGG

>hsamiR1267

CCTGTTGAAGTGTAATCCCCA

>MSTA

CCAAATCTCATGTTGAAATGTAATCCCCAATGCTGGAGGTGGGG

>QTRTD1

CCAAACCTCAAGTTGAAATGTAATCCCCAATACTGGAGGTGGGG

>hsamiR1267

CCTGTTGAAGTGTAATCCCCA

>MSTA

GGATATTTGTCCTCATCCAAATCTCATGTTGAAATGTAATCCCCAATGCTGGAGGTGGGG

>UGT1A1

GGATATTTGTCCACACTCAGATCTCATGTTGAATTGTAATCCCCAGTGCTGGAGATGGGG

>hsamiR548q

GCTGGTGCAAAAAGTAATGGCGG

>MADE1

TTAGGTTGGTGAAAAAGTAAT

>MTMR6

TTAGGTTGGTGCAAAAAGTAATTGCGG

>hsamiR1273a

GGGCGACAAAGCAAGACTCTTTCTT

>AluS

AGAGTCTTGCTTTGTCGCCAGGCTGGAGTGCAGTGGCGCAATCTTGGCTCACTGCAACCTCCACCACCCGGGTTCAAGCAATTCTCCTGCCTCAGCCGCTGAGTAGCTGGGATTATAGGCGAGCGCCACCACGCCCGGCTAATTTTTGTATTTTTAGTAGAGATGGGTTTCACTATGTTGGCCAGGCTGGTCTCGAACTCCTGACCTCGTGATCCACCACCTTGGCCTTCCAAAGTGCTGGGATTACAGG

>XPNPEP3

GGCGACAAAGCAAGACTGTCTCTGGCTGGGGGCCGTGGCTCATGCCTGTAATCCCAGCAGTTTGGGAAGCTGAGGTGGGTGGATCACAAGGTGAGGAGATCAAGACCAGCCTGGCCTGGCCAAGATGGTGAACCCCGTCTCTACTAAATAACAAAAATTGGGTGTGGTGGCAGGTGCCTGTAATCCCAGTTACTAGGGAGGCTGAGGCAGGAGAATTGGTTGAAGCCGGTGGGTGGAGTTGCAGTGAGCCAAGATCACACCACTGTACTCCAGCCTGGGTGACAGAGTGAGACTCTATCTCAAAAAAAAAAAGAACTAAAGGCTCAACACAAATAAATGATAAATGTTCAATGTGATGGATATGCTAATGTTCTGATCTGATCATTATATATGTATCAAAACATCATTATTTACCCTGTAAATACGTACAATTATATGTCAATTAAAACTTTAAAAAGGCTGGGTGCAGTGGCTCACGCCTGTAATCCCAGCACTTTGGGAGGCTGAGGTGGGCAGATTAGAGGTCAGGAGATTGAGACCATCCTGGCTAACACAGTAAAACCCCATCTCTACTAAAAATACAATAAACTAGCCGGCATGGTGGCAGCGCCTGTAGTCCCAGCTACTCAGGAGGCTGAGGCAGAAGAATTGCCTGAACCCGGGAGATGGAGTTGCAGTGAGCCAAGATCGTGCCACTGCACTCCAGCCTGGGTGACAGAGCGAGACTCCATCTCAAAAAAATAAAAAACAAAAACCCCAAAAAACCTTTAAAAAAAAAAAAAAAAAGCTAATATAAAGCCTTACCTTAAAACTCTGAATTTATCTTATTCACTTTTTACCCTTAGAAGTTTATGAACTTGCAAAGGCAGTTGAAAATATGGTAAGTCTTCAAGTCCAGCTTTATTAATGTAAGAGACCAGCAAACCTTTAACCTAAATTTTAAGAATTTTAAGAAATATTTGGAAAATACTATTAGAAAAATAAAATATTTGATATCCAGTAACAGTTAATAGCATTCTCTGTATTAATAAAATTAATAAGGGAATGGGTATGTCTGCGGCATGGCTGAGAATGAGTAAGATCACACACAGCTTATCTGCTCAACAAATCCTGAATATATCAGACAGCCATAACATTGCTATGAGAAGTCTGATTCAAATGCTTAGCTGCTATAGTTAGTTAATCTGGGACTCAAAGGACAATATACCTGGGTCAGGGACTGAAAATCACCGAAGAATTCTACAACAGCCTTTCTGCCTACCAATAACACCTATAGAACTTGACTGGAATCTAACCAGAAGTGTGTTTCATGTCCAAGTATGCTGCTATACATAAAGCTACCTAGCTTTTAGCTAGAAAAGTTTAGACCATAGAAAATGATACAGGAGGTGCGGTGGCTCACGTCTGTAATCGCAGCACTTAGGGAGGCCGAGGCGGGCAGATCATGAGGTCAGGAGTTGAGACCAGCCTGGCCAACACAGTGAAACCTCGTCTCTATTTAAAAATACAAAAAATAGCCGGGTGTGGTGGCAGGCGCCTGTATTCTAGCTATTCGGGAGGCTGAGGCAGGAGAATCGCTTGAACCTGGGAGATGGAGGTTGCAGGGAGCTGAGGTCTCGCTATTGCACACCAGCCCCGGTGACAGTGTGAGACTCCGTCTCAAAAAAAAAAAAAAAAAAGAAAAGAAAAGAAAATGATACAAGAAGAAAAGGAAATTCCTTATTCTGGATTACAAATGAACAAAGGAAACACAATCCAAGGAAAGGGCTGTTGGGGGCACAGAGCCTGGAAAGTGAGCAGCCAGAGCTGTGGAGTTATTTCCCTCCCCTTTTTTAAAAAGCTCTGGATTGAGAAATTGGAGGGAGGTGGGAAGGTGGGTATGGGGGATGGAGACTCCAGCTGTGCAGCCTCCATTCTGAGAGCTGCTTAGATAAGGTGCGCAAAGCCAGGCATTCTAGGCTAGCACTGTCAGGATATGATTTGTATCACTTTTGTTCACATTATCTGTCTCTTGAGGAAGTCACTGCCTGTCTGCTTTTCACTCTGTACCCTGGGTTTCCCTGATAAGATAGGCAAACCTCCAGCATTACAGAGATTGTTAATCCCCTAGCTTGTGCTTCCCTAATACAAATTGTTTTTTAAGAAACCTCAAATTTGTGTTCTAACAATTGGCATGTTTTATACATCTTGACCTCATATCCAGGTTTAAAGGAGGTGAACACACTGGTTCTTAAAGCTTCCCTATCACAGACGCTCCTAATAAGCTATCTGTGGTAATCTAGCCCTGTTTCATCTTGCAAACCTGAGTTGCTGTATAATGTATCCAATGTTTGTGTTTAAAAAATATGACTCTTACACCGGGCGCAGTGGCTCATGCCTGTAATCCTAGCACTTTGGGAGGCTGAGGTGGGCGGATTGCCGGAGCTCAGGAGTTTGAAGCCGGCCTGGGCAACAGGGTGAACCCGTCTCTACTAAAATACAAAAAATTAGCTGGGCATGGCAGCGTGCACCTGTAGTCCCAGTTACTTGGGAGGCTGAGGCAGGAGAATTGCCTGAACCCAGGTGGTGGAGGTTGTAGTGAGCTGAGATTACGCCACTGCACTCCATCCAGCCCAGGCGACAGAGCGAGACTCTGTCTCAAAAAAAAAAAAAAAAAAGAAAGTATGACTCTTACCCTGCACTCCAG



TGCTAGTATCAAAGAAAGATAAGAATCATAGGATATTTACGGGTA CTGGTAGATTCCATATTTTGTCTATTAGC  
ACTAGAGGAAATCACAGAATGATAACAGGGGTA CTCTCTGAAA CTGGGCGCTACTACTGTGACTCTGACAGG  
TACGTAAGTAGAGGATCTGCTCCTGCGCAGCACAACAGCTAAAAGGGTAACCTGTGAGGGTCAGTGCATTAAGAA  
TCTATAGAGGGAGCAGGGATATCTGCGAAAGAAATCTTTCTTTTTTTTTTTTTTTTTTTTTTTTTTTTTTTTTTTT  
TCTCGCTCTGTACCCAGGCTGGAGTGCAGTGGCGCGATCTTGCTCACTGCAAGCTCTGCCTTCTGGGTTACAGC  
CATTCTCCTGCCTCAGCCTCCTGAGTAGCTGGGACTACAGGCATCCGCCACCACGCCAGCTAATTTTTTTTGTATT  
TTAGTAAAGACGGGGTTTACCCTGTTAGCCAGGAGGTCTCAATCTCCTGACCTCGTGATCCGCCACCTCGGCCT  
CCCAAAGTGCTGGGATTACAGGCTTGAGCCACCACGCCCGCCAGAAATCATTTTTTTCTTTTCTTTTATTAATTT  
TGAAGTCATCATTAAAGAAATCAACTTTAAATTGAAGAGAAAAGATGGCAGGATGTCAGGATTTTATTTATTTATTT  
GTTTTTTGAGGCAGAGTCTTGCTCAGTACCCAGGCTGGAGTGCAGTCGCATGAGCTCAGCTCACTGCAACCTCC  
ACCTCCCAGGTTCAAGCAATTCTCATGCCTCAGCCTCCAAGTAGCCAGGATTACAGGCATGTATCATCACACCCAG  
CTCATTTTTGTATTTTTAGTAGAGACAGTGTTCACCACGTTGGCCAGGCTGGTCTTGACCTCCTGGTCTCAAGAGA  
TCCACCTGCCTGGACCTCCCAAAGTGCTGGGATTACAGG

>hsamiR548a\_5p  
AAAAGTAATTGCGAGTTTTACC  
>MADE1  
AGTATTACGTTGGTGCAAAAGTAATTGC  
>MTMR6  
AGTATTAGGTTGGTGCAAAAGTAATTGCG

>hsamiR1268a  
CGGGCGTGGTGGTGGGGG  
>AluYc2\_Repetitive\_sequence\_Homo\_sapiens  
TTTAGTAGAGTCGGTGTCTCCATGTTGGCCAGGCTGGTTTCGAACTCCTGACCTCAGGTGATCCACCCACCTCAG  
CCTCCCAAAGTGCTGGAATTACAGGCGTGAGCCACCG  
>RBM7  
GGCGTGGTGGTGGGTGCCTGTAATCCCAGCTACTCGGGAGGCTAAGGCAGGAGAATCACTTGAACCCGGGATAT  
GGAGGTTGCAGTGACCTGAGATCCC GCCATTGCACTCTAGCCTGGGTGTCGTAGCAAGACTCTGTCTCAAAAAA  
AAACAAAAACAAACATGCAGTATTAATCTTCGTTAACATCTACAAACCTACTAAGTTTTATATGGATAAGATACCC  
AAAAATAATAATCTCATTGGAACAAATCTGTGAAAATGCTTAAGCAAACAAATTGTTTATCTTAATTCTATAGTG  
AGTAGTTGAATAGCTACATTTACTTAGAAAACAGAAA ACTGAATTCATTTATAAACAGGAAATCTAAGTGTACTTTA  
ACTCCTAGAGACCACTGAGGGTA ACTAAAGTACTCCAAGCTATAATCGAGGGGTCACTGAAAATCTGATTGTGAA  
ACATCATGCTCTATATGTACAAAAGATGTATTT CAGGATGCTCAAAATTAAGA ACTGATATTCTAAACAGCAGGC  
AATCAGTGAATAAAAAGTATGTTAATCTTTGTGTACAATGTCTCTGAAGTCAGTGACATAAAAAAAAAAAAAATAAC  
ACACACCCTTCTTTTATATTTT CAGTATATTA AAAAGGAACAGTACAAATGCTGTGGTATTA AAAAGGATCCTTAT  
TTTTCAACAAATGA ACTTTTATAACAATCTGTAATGAAATGAAAACAGTATCTTAATACAAGCTTTTGTAAACA  
AGATTTTAAAATTTTAAAATTAGAAAACGTTAAGATTA ACTCTTTCAAAGGTTCAAACAAAAAACAACCTGTACA  
ATCTCCATTACATGTGTCTTTGTACACAGTCTGGGCACTTTGAAAATGTTAAAGTTTTTAACTTTGACTGACAGAA  
GCAGCACTTAAAGGCTTCATGAATCTATTTT CAAAAAAGTATGCTTT CAGTAAAACATTTTACCATTTTATCTAACT  
ATGCACTGACATTTTGTCTTCTGAAAAGGGGATTTATGCTAACACTGTATTTTAAATGTAAAATATACGTGTA  
GAGATATTTTAACTTCTGAGTGACTTATACCTCAAATGGGATTTAATGAACAATTTCTAAATTTTAGAATGAAACA  
GTATGTGTAATCTACACATGTATGTTCAACTAGGGTAAAGCTCAAGAGCATGTCACAGAATTTATACCTAAATTAT  
ATAAGAAGTTAAGCAATGCCTTATCCCCAACTTTACCAATAAGCCTTCTCAAATAGAATGTTAGTAAAGTGAATC

ACTGAAAAGTTTCATTTTTGAATTAACATAAAATACCAGTAGCCATTTTAGACTGTCAACCTGGATGTTTTCTTGATTC  
ACTAGCAAGAAATTTCTTGCAATACAAAAAGATAACAAATAATTAATAATCTGCTTTATCATACAACTTCACCCCC  
TCCTAAAGTGCTAAAATGATTAGGAATTGTAGCACTTTCTTTGCATAAAACCTTTCTCTTCATAAAACCTGAG  
GTGAAAGGTTATTAATGTAATAAACCGCAATTCATTTTGTATTAACCTGTAGCTTTAAAAAAATTTATAAGAAAT  
GTGACAACCTGTAAAGCTGCTCTGTACAGTTTTTCAACAAAATATTTCCATATCAACTTAGTCAAAGGGCCTAAAAT  
GACCCTATAAAAAAATGTCCTTTAACATGTGTTAGTGTGAGATGAGCGCCATTTCCATCTCTACTACTGTCTCT  
TCTGTTATCATAGTCATGGCTCCAGTCATCATGATTCCTGTCTTCATAGAAGAAATCATCTCTCTTTCTCTGTAATG  
ATGGTCAGACCCATGATCAGTGAACGCTGTTCCCGGCTATAATGTCTATCTGCTAGGTAGGGATAAGAATTCATT  
CTGACTTTACGCTGTGATGATGGTGTACCTTGGCGCCACTGGGAGCTTGAAGACTGATTGAAACTATGACTGTGTG  
ATTGAACTGATGGTGAATACTGATTGATCCAGAGGTGAAGAACCAAATTTCCACCATATGACATTTGTCTCAA  
AGCACTGTTTCATCTGAGGAATAGGAAAAGTGAAATGTTAATACTTCTAGATATCAAAGCTAATATGTATTTGGTC  
AGTTAACAGAAAATGAAAGAAAATAAAGTCACTCTTGCTAGATGGATCCACAACCTAAAGCAGTACAATAGCTTCA  
ATCATTCCAATGTATACCTACAAGATACATATATACATAAATACTACTCTTTGTCCTCAAGAATGCAACTCAGAAT  
AAGTCACACAAAATGACTATAATGCAAAATCACTGTGTAACAAAACAAGAATCAGGAGATCAGTATCATTAGGAA  
AGGTTTCATGAAGGTGGCATATGATCTGGGTATTAACAATGGATGGAATATTTTCATATTTAAGGGAGAGATA  
TGCCAAGAAAAGGAAATTGCACAAACAAAATAACAGGGAAACACAGAACAGGTTTCATAGAATACCAAGTAATTC  
TTTGAGACAGGTTACAGATCTCGGCTCACTGCAAGCTCCACCTCCCGGGTTCAAGCGATTCTCCTGCCTCAGCCTCC  
CAAGTAGCTGGGACTACAGGCTGTGCCACCACGCCCGGCTAATTTTTGTATTTTAGTAGAGACGGGGTTTCACC  
ATCTTGCCAGGCTGGTCTCGAACTCCTGACCTCGTGATCCACCCACCTCAGCCTCCCAAAGTGCTGGGGTTACAG  
GCGTTAGCCACCG

>hsamiR1268a

CGGGCGTGGTGGTGGGG

>AluYc2\_Repetitive\_sequence\_Homo\_sapiens

TTTAGTAGAGTCGGTGTCTCCATGTTGGCCAGGCTGGTTTGAAGTCTGACCTCAGGTGATCCACCCACCTCAG  
CCTCCCAAAGTGCTGGAATTACAGGCGTGAGCCACCG

>RBM7

GGCGTGGTGGTGGGTGCCTGTAATTCAGCTACTCGGGAGGCTGAGGTGAGAGAATCACTGGAACCCAGGAGGC  
GGAGGTAGCAGTGAGCTGAGATTGTGCCACTCTACTCCAGCCTGGGTGACAGAGTGAGGCTCTGCCATAAATAAA  
TTAAAATAAAAATAAAAACAAAGTCACACATTATTCATGAATACAGATCCAAAACCTTTTGAAGTTTGACAAAATGA  
ACAAATAGAATTCTAGAATACATGTAAGTGTGACATGTAATTCAGGATGCAATGTTTTAGGTTTAGAGAGCCTATT  
CAAAGTTTTATGTGTTGAATCCTCCTTTCTTATTCAATTAACAGACGTTCTTCTTTCATCAAAAAGTTTCACTGTT  
AAATATATGCCAGGCACTGGATCCTGGGAATGCAGTGATGAATAAGATAAGGTCTGTCTTCATAGAGCTGTCTAC  
AGAGACAGACAAGTAAAAGAAAATTATAATACAGTCTAAAGGCTATGATAAAAGAAAAAGATATTTGGGGAAT  
ACATAACTTGGCACTGAATCTGGATTTAGAGCTCTGGAAAGGCTTTCTAGAGGAAGTAATGCATAGATTGAGCA  
GTGAAGGGCAGTTACTATGAGAACTAAAGTGGGGAAGTCATCAGAGGAGACTGAAGTAGCATGCCAAATAGG  
GGTCATATTAAGTTGAGAATTTGTAAGTCAAGTCAAGGCACTGAAGCTTTATTCAGGCGAGTGACAGATTTACA  
TCTTCAATTCTAAGAGTGTGGAATAAATTTGAGGAAAGAAGACTGGAAGCAGGAAAACATTAGGGTGTCTTGG  
AATAATCCTCTTGAGAAAATTGCCTACTCTAAGATGGTAGCAGTAGGTATGGGGAAAAGTGGGCACACACAACATA  
ATTAGAAAGTGGTATAAAAATTTATTTTAGATGGGGAAGGTAGAAAATACTAGGTTAAGTATAAAGGGATTTCT  
TTACCTATAGTACTTGTGAGAAATTTATGGTGCTGTTTTGAGTAAAAGAAAGTCACACAGTAACACAAAATGGCT  
TCCAAACATTTGATTTTTTTTTCTTTTTTTAGAAAGACTTTATGAGACACTAGCATTCCACAGGAAACACTATGGGA  
GAAACTGTTCTCCACAAAATAATCTCTTCTTCTTCTGTTCTTGCAGCTGTCAATATAGATGAAGCATCCCAAAT

CTGAAATCTGAAATGCTCCAAAATATGAAACTTTTTGAGTGCCAATACAGATGTGACACTCAGGGGAAAGGCTCAT  
TGGAGCACTGTGGATTTCCGGACCTGGGATGCTCAACTGGCAAGCATTAAATGCAAATATTCCAGAACCCAAAACAC  
TTCTCAAGCATTTTGAATAAGGGATGCTCAAACCTGTACTTCTGAGTTGTCTACCAACTATATTCAATTTTTAAGG  
CTGTCTTGTCTGTCCCTTACACAATACATGTATTTAGTTTGGTTACTTTTCAGCTCACTGAAAGTGAAGTAAAAA  
GAAGATTCACCAGAACTTCACAAGCTCCCTCAAAAAGCCATTGAAAAAGATTATTCTGAGTCAGGGTCATCTGTT  
AACCAATATAAAAGGATCCGACCCACAGATAACGTTGTAATAAAGCAGTATTAGGCCAGGCGCGGTGGCTCACAC  
CTGTAATTCCAGCACCTCGGTAGGCCAAGGTAGGTGGATCACTTGAGGTCAGGAGTTTGGAGACCAGCCTGGCCAA  
TGTGGTGAACCCCATCTCTACTAAAAATACAAAAACTAGCCAGGCGTGGTGGTGGTGCCTGTAATCCCAGCTAC  
TCGGGAGGCTAAGGCAGGAGAATCACTTGAACCCGGGATATGGAGGTTGCAGTGACCTGAGATCCCGCCATTGC  
ACTCTAGCCTGGGTGTCGTAGCAAGACTCTGTCTCAAAAAAAAAACAAAAACAACATGCAGTATTAATCTTCGTT  
AACATCTACAAACCTACTAAGTTTTCATATGGATAAGATACCCAAAAATAATAATCTCATTGGAAACAAATTCTGTG  
AAAATGCTTAAGCAAACAAATTGTTTATCTTAATTCTATAGTGAGTAGTTGAATAGCTACATTTACTTAGAAACAGA  
AAAACCTGAATTCATTTATAAACAGGAAATCTAAGTGACTTTAACTCCTAGAGACCACTGAGGGTAACTAAAGTAC  
TCCAAGCTATAATCGAGGGGTCACTGAAAATCTGATTGTGAAACATCATGCTCTATATGTACAAAAGATGTATTTCC  
AGGATGCTCAAAATTAAGAAGTACTGATTTCTAAACAGCAGGCAATCAGTGAATAAAAGTATGTTAATCTTTGTGT  
ACAATGTCTCTGAAGTCAGTGACATAAAAAAAAAAAAAATAACACACACCCTTCCTTTTATATTTTCAGTATATTA  
AAGGAACAGTACAAATGCTGTGGTATTA AAAAGGATCCTTATTTTTCAACAAATGAACTTTTATAACAATTCTGTA  
ATGAAATGAAAACAGTATCTTAATACAAGCTTTTGTAAACAAGATTTTAAAATTTTAAAATTAGAAAACGTTAAGA  
TTAAACTCTTTCAAAGGTTCAAACAAAAAAACAACCTGTACAATCTCCATTACATGTGTCTTTGTACACAGTCTGGG  
CACTTTGAAAATGTTAAAGTTTTAACGTTTGACTGACAGAAGCAGCACTTAAAGGCTTCATGAATCTATTTTCAA  
AAAAGTATGCTTTCAGTAAAACATTTTACCATTTTATCTAACTATGCACTGACATTTTTTTGTTCTTCTGAAAAGGGGA  
TTTATGCTAACACTGTATTTTTAATGTAAAATATACGTGTAGAGATATTTTAACTTCTGAGTGACTTATACCTCAA  
ATGGGATTTAATGAACAATTTCTAAATTTTAGAATGAAACAGTATGTGTAATCTACACATGTATGTTCAACTAGG  
GTAAAGCTCAAGAGCATGTCACAGAATTTATACCTAAATTATATAAGAAGTTAAGCAATGCCTTTATCCCAAACCT  
TACCAATAAGCCTTCTCAAATAGAATGTTAGTAAAGTGAATCACTGAAAAGTTTCATTTTTGAATTAACATAAAATAC  
CAGTAGCCATTTTAGACTGTCAACCTGGATGTTTTCTTGATTCACTAGCAAGAAATTTCTGCAATACAAAAAGATA  
ACAAATAATTAATAATCTGCTTTATCATACAACTTCACCCCTCCTAAAGTGCTAAAATGATTAGGAATTGTAGC  
ACTTTCTTTGCATAAAACCTTTCTCTTTCATAAAACCTGAGGTGAAAGGTTATTAATGTAATAAAACCGCAATTC  
ATTTTGTATTAACCTGTAGCTTTAAAAAATTTATAAAGAAATGTGACAACCTTGAAAGCTGCTCTGTACAGTTTTT  
CAACAAAATATTTCCATATCAACTTAGTCAAAGGGCCTAAAATGACCCTATAAAAAACAATGTCCTTTTAAACATGTGT  
TAGTGTGCGAGATGAGCGCCATTTCCATCTCTACTACTGTCTCTTCTGTTATCATAGTCATGGCTCCAGTCATCATGA  
TTCCTGTCTTCATAGAAGAAATCATCTCTCTTCTCTGTAATGATGGTCAGACCCATGATCAGTGAACGCTGTTCC  
CGGCTATAATGTCTATCTGCTAGGTAGGATAAGAATTCATTCTGACTTTACGCTGTGATGATGGTGTACCTTGGC  
GCCACTGGGAGCTTGAAGACTGATTGAAACTATGACTGTGTGATTGAACTGATGGTGAATACTCTGATTGATCCA  
GAGGTGAAGAACCAAATTTTCCACCATATGACATTTGTCTCAAAGCACTGTTTCATCTGAGGAATAGGAAAAGTGG  
AATGTTAATACTTCTAGATATCAAAGCTAATATGATTTGGTCAGTTAACAGAAAATGAAAGAAAATAAAGTCACT  
CTTGCTAGATGGATCCACAACCTAAAGCAGTACAATAGCTTCAATCATTCCAATGTATACCTACAAGATACATATAT  
ATACATAAATACTACTCTTTGTCCTCAAGAATGCAACTCAGAATAAGTCACACAAAATGACTATAATGCAAAATCAC  
TGTGTA AAAAACAAGAATCAGGAGATCAGTATCATTAGGAAAGTTTCATGAAGGTGGCATATGATCTGGGTAT  
TAAAACAATGGATGGAATATTTTCATATTTTAAAGGGAGAGATATGCCAAGAAAAGGAAATTGCACAAACAAAAAT  
AACAGGGAAACACAGAACAGGTTTCATAGAATACCAAGTAATCTTTGAGACAGGTTACAGATCTCGGCTCACTGC  
AAGCTCCACCTCCCGGTTCAAGCGATTCTCCTGCCTCAGCCTCCCAAGTAGCTGGGACTACAGGCCTGTGCCACC

ACGCCCCGGCTAATTTTTGTATTTTTAGTAGAGACGGGGTTTCACCATCTTGGCCAGGCTGGTCTCGAACTCCTGACC  
TCGTGATCCACCCACCTCAGCCTCCCAAAGTGCTGGGGTTACAGGCGTTAGCCACCG

>hsamiR1255a

AGGATGAGCAAAGAAAGTAGATT

>TIGGER1

TGGTAGAAATATCAAGAGAACTAGAAATTAAGTGAATCCTGAAGATAGGACTGACTTGGTGCAATCCCATGATA  
AAATTTTAATGGATAAGGAGTTGCTTCTCAAGGATGAGCAAAGAA

>PYROXD1

TGGTGGAAATAACAAAAGAACTGTAATTAGAAATGAATCCTGAAGATGAGACTACATTGCTGCAATCTCATGATA  
AAATTTGAAAAGATGAGTTGTTGTTTCTCATGGATGAGCAAAGAACGTAG

>hsamir151a\_5p

TCGAGGAGCTCACAGTCTAGT

>L2\_Plat1o/MdoRep1\_SINE\_Metatheria

TCCCTGTCCTCAAGGAGCTTCAGTCTAGTAG

>GRIA4

TCCCTGCCCTCAAGGAGCTTACAGTCTAGTAG

>hsamiR548h\_3p

CAAAAACCGCAATTACTTTTGCA

>MADE1

TAATGACAAAAACCGCGATTACTTTTGACCAACCTAATAG

>SMU1

TAATGGCAAAAACCGCAATTACTTTTGCACTAACCTAATAG

>hsamiR548u

CAAAGACTGCAATTACTTTTGCG

>MADE1

AAAAACCACTACTTTTGACCATCCTAATAG

>ANKRD5

AAAAACCACTACTTTTGACCAACCTAATAG

>hsamiR1304\_5p

TTTGAGGCTACAGTGAGATGTG

>ALU\_SINE1\_7SL\_Primates

ATCACTTGAGCCCAGGGGTTGAGGCTACAGTGAG

>DPY30

ATCACTTGAGCCCAGGAGGTCGAGGCTACAGTGAG

>hsamiR1972

TCAGGCCAGGCACAGTGGCTCA

>AANU01178229.1\_7254x6952\_RF00100\_7SK

CTCTGTTGCCAGGCTGGAGTGAGTAGCACAACTCACCTCACTGCAATCTCTGCCTCCGGGTTCAAGTGGTTCT  
CCTGCCTCAACCTCCTGAATTGCTGGGATTACAGGTGCATGCCACCACATCTGGCTAATTTCTGTATTTTTAGTAG

AGACAGGGTTTCACTATGTTGCCAGGCTGGTCTCGAACTCCTGACCTCAGGTGATCCGCTGCCTCAGCCTCCCA

AATTGCTGGGATTACAGGCATGAGCCACTGTGCCTGGCCT

>MEFV

AGGCCGGGCACAGTGGCTCATGCCTGTAATCCCAGCACTTTGGGAGGCTGAGGCGGGTGGATCACCTGAGGTCA  
GGAGTTCGAGACCAGCCTGGCTAACATGGTGAAACCCCGTCTCTACTAAAAATACAAGAAAACCAGCCTGGTGT  
GGTGGCACGCACCTGTAATCCCAGCTGCTCAGGAGGCTGAGGCAGGAGAATCGCTTGAACCTGGGAGGTGGAGG  
TTGCAGTGAGCTGAGATCGTGCCACTGCACTCCAGCCTGGGCCACAGAG

>hsamiR1972

TCAGGCCAGGCACAGTGGCTCA

>AANU01178229.1\_7254x6952\_RF00100\_7SK

CTCTGTTGCCAGGCTGGAGTGCAGTAGCACAATCTCACCTCACTGCAATCTCTGCCTCCCGGGTTCAAGTGTCT  
CCTGCCTCAACCTCCTGAATTGCTGGGATTACAGCTGCGTGCCACCACATCTGGCTAATTTCTTGATTTTTAGTAG  
AGACAGGGTTTCACTATGTTGGCCAGGCTGGTCTCGAACTCCTGACCTCAGGTGGTCCGCTGCCTCAGCCTCCCA  
AATCGCTGGGATTACAGGCATGAGCCACTGTGCCTGGCT

>MEFV

AGGCCGGGCACAGTGGCTCATGCCTGTAATCCCAGCACTTTGGGAGGCTGAGGCGGGTGGATCACCTGAGGTCA  
GGAGTTCGAGACCAGCCTGGCTAACATGGTGAAACCCCGTCTCTACTAAAAATACAAGAAAACCAGCCTGGTGT  
GGTGGCACGCACCTGTAATCCCAGCTGCTCAGGAGGCTGAGGCAGGAGAATCGCTTGAACCTGGGAGGTGGAGG  
TTGCAGTGAGCTGAGATCGTGCCACTGCACTCCAGCCTGGGCCACAGAG

>hsamiR3934

TCAGGTGTGGAAACTGAGGCAG

>MIR

CATTTTACAGATGAGGAA

>KSR1

CATTTTACAGATGAGGAAACTGAGGCAG

>hsamiR1303

TTTAGAGACGGGGTCTTGCTCT

>PB1D11

TTGTAGAGTTGAGGTCTCGCTATGTTGCCAGCCTGATCTCAAACCTCCCGGCCTCAAG

>GTF2IRD2B

TTGTAGAGATGGGGTCTTGCTATGTTGCCAGGCTGGTCTCAAACCTCCTGGCCTCAAG

>hsamiR1303

TTTAGAGACGGGGTCTTGCTCT

>PB1D11

TTGTAGAGTTGAGGTCTCGCTATGTTGCCAGCCTGATCTCAAACCTCCCGGCCTCAAG

>GTF2IRD2

TTGTAGAGATGGGGTCTTGCTATGTTGCCAGGCTGGTCTCAAACCTCCTGGCCTCAAG

>hsamiR548h\_5p

AAAAGTAATCGCGTTTTTTGTC

>MADE1

TATTAGGTCAGTGCAAAAGTAATTCCAGTTTTT

>MTMR6

TATTAGGTTGGTGCAAAAGTAATTGCGTTTTTTGTC

>hsamiR1285\_3p

TCTGGGCAACAAAGTGAGACCT

>AluJ

CAGGAGTTTGAGACCAGCCTGGGCAACAAAGTGAGATCCTATCTCTACAAATAATAAAAAAATTAGCTGGGTGTG  
GTGGCATATGCCTGTAGTCCCACTACTTGGGAGGCTGAGGCAGGAGGACTGCCTGAGCCTAGGAGTTTGCAGCT  
GCACTGAGCTATGATGGTGCCGCTGCACTCCAGCCTGGGCAAAAGAGTGAGACTGTGTC

>OR7D2

CAGGAGTTCAAGACCAGCCTGGCCAACATGGTGAAACCCTGTCTCTACTAAAAATAGAAGAATTAGCTGGGTGGG  
GTGGCAGGTGCCTGTAGTCCCAGCTACTCAGGAGGTTGAGGCAGGAGAATCGCTTGAACCTGGGAGGTGGAGGT  
TGCAGTGAGATGAGATCGCGCCACTGCACTCCAGCCTGGGCAACAGAGTGAGACTCTGTC

>hsamiR1285\_3p

TCTGGGCAACAAAGTGAGACCT

>AluJ

CCAGCCTGGGCAACAAAGTGAGATCCTATCTC

>ZNF528

CCAGCCTGGGCAACAGAGTGAGACTCTATCTC

>hsamiR548n

CAAAAGTAATTGTGGATTTTGT

>MADE1

TGGTGCAAAAGTAATTGCGGGTTTTGC

>HLA-DMB

TGGTGCAAAAGTAATTGCGGGTTTTGC

>hsamiR548n

CAAAAGTAATTGTGGATTTTGT

>MADE1

TTAGTTGGTGCAAAAGTAATTGCGGGTTTTGC

>KATNAL1

TTAGGCTGGTGCAAAAGTAATTGCGGGTTTTGC

>hsamiR548h\_5p

AAAAGTAATCGCGGTTTTTGTGTC

>MADE1

TTAGTTGGTGCAAAAGTAATTGCAGTTTTTGC

>KATNAL1

TTAGGCTGGTGCAAAAGTAATTGCGGTTTTTGTGTC

>hsamiR548a\_3p

CAAACTGGCAATTACTTTTTGC

>MADE1

CAATTACTTTTTGCACCAACTTAA

>CD38

GCATTTGTTGGAAGAGAATATAAACTACTATTAGTTTGGTATGAAAGGCCTAGAAGGAAAAAGCACATGAATTTT  
GGAGTTGGACAGAGTTGAGTTCAAATTCAGTCTCTAGCTTGATACTAAATGTAGGACTTACGGTAAATTATTAGGT  
TGGTTCAAAAATAATTGTGGTTTTGCCATTCTTTTCGGTGGCAAACTTGCAATTACTTTTTGC

>hsamiR548a\_3p

CAAACTGGCAATTACTTTTGC

>MADE1

AAAACCTCGCAATTACTTTTGCACC

>CD38

GCATTTGTTGGAAGAGAATATAAACTACTATTAGTTTGGTATGAAAGGCCTAGAAGGAAAAAGCACATGAATTTT  
GGAGTTGGACAGAGTTGAGTTCAAATTCAGTCTCTAGCTTGATACTAAATGTAGGACTTACGGTAAATTATTAGGT  
TGGTTCAAAAATAATTGTGGTTTTGCCATTCTTTCCGGTGGCAAACTTGCAATTACTTTTGC

>hsamiR603

CACACACTGCAATTACTTTTGC

>MADE1

TGCAATTACTTTTGCACCAA

>CD38

GCATTTGTTGGAAGAGAATATAAACTACTATTAGTTTGGTATGAAAGGCCTAGAAGGAAAAAGCACATGAATTTT  
GGAGTTGGACAGAGTTGAGTTCAAATTCAGTCTCTAGCTTGATACTAAATGTAGGACTTACGGTAAATTATTAGGT  
TGGTTCAAAAATAATTGTGGTTTTGCCATTCTTTCCGGTGGCAAACTTGCAATTACTTTTGC

>hsamiR548m

CAAAGGTATTTGTGGTTTTTG

>MADE1

CAAAGGTATTTGTGGC

>TMEM132D

CAAAGGTATTTGTGGC

>hsamiR1285\_3p

TCTGGGCAACAAAGTGAGACCT

>AluJ

CCAGGAGTTTGAGACCAGCCTGGGCAACAAAGTGAGATCCTATCTCTACAAATAATAAAAAAATTAGCTGGGTGT  
GGTGGCATATGCCTGTAGTCCCACTACTTGGGAGGCTGAGGCAGGAGGACTGCCTGAGCCTAGGAGTTTGCAG  
CTGCACTGAGCTATGATGGTGCCGCTGCACTCCAGCCTGGGC

>AFF3

CCAGGAGTTTGAGACCAGCCTGGGCAACATAGTGAGACCCCATCTCTACAAAAAAATAAAGAAAAAATTAGCC  
GGGTGTGGTGGCACGTGCCTATCTTCCAGCTGCTTGGGAGGCTGAGGCAGGAGGATTGCTTGAGCCCAGGAGT  
TTGAGGCTGCAGGGAGCCATGATCGCGCCACCGCATTCCAGCTTGGGC

>hsamiR1304\_3p

TCTCACTGTAGCCTCGAACCCC

>ALU\_SINE1\_7SL\_Primates

CTCACTGTAGCCTCAAACCGCTGGGCTCAAGTGTCTCTCCTGCCTTAGCCTCC

>ERN2

CTCACTGCAGCCTCGAACTCCTGGGCTCAAGTGATTCTCCACCTCAGCCTCC

>hsamiR1972

TCAGGCCAGGCACAGTGGCTCA

>AANU01178229.1\_7254x6952\_RF00100\_7SK

CCTCCCGGGTTCAAGTGTTCCTGCCTCAACCTCCTGAATTGCTGGGATTACAGGTGCATGCCACCACATCTGGC  
TAATTTCTGTATTTTTAGTAGAGACAGGGTTTCACTATGTTGGCCAGGCTGGTCTCGAACTCCTGACCTCAGGTGA  
TCCGCTGCCTCAGCCTCCCAAATTGCTGGGATTACAGGCATGAGCCACTGTGCC

>CA5B

AGGCCAGGCACAGTGGCTCACACCTGTAATCCCAGCACTTTGGGAGGCCAAGACGGGTGGATCACGAGGTGAGA  
TCGAGACCATCCTGGTTAACACGGTGAACCCCTGTCTCTACTTAAAATACAAAAAATAGCCGGGTGTGGTGGCGG  
GCGCCTGTAGTCCCAGCTACTCAGGAGGCTGAGGCAGGAGAATGGCGTGAACCCGGGAGGCGGAGCTTGCAGT  
GAGCCGAGATCGCGCCACTGCACTCCAGCCCAGGCTGACAGCGCGACTCTGTCTCAAAAAATAAAAAAATAAAA  
AAAAATAAAAAACAAGACAGCTAGGAGGAAAGCCTGTATGCTTTGGAAAATGCATATCTTGTGTGTTTACCCTTT  
AAAGGTAATACTTTGAAACAGGTGAACTGCAGAAAGTTAAACAAGACTTCTTTTTTACCATGTTTACCTTTCT  
AAGAATTCTATGCATTTCTAGGGCATAACATGCAAAAGCCTTCACATTTCCCCCTTTTTAAAAGAGATATTTCTCAA  
CTTATACGTATACAGTTCAAGTAGTGTAAAGTACAATCACACTTGTGTTTGAACAGATCTCTAGAATTCTTGCAACAC  
AAGCTCTGTACCCACTAAATACAAATTCACCCTCTCCCCTCCCCAACCGTTGCTTGCAACCACCTTTCTACTTTCT  
ATTGTATGATTTTGACTACTTTGCATACTTCACATGGAGGAATCATATAGCATTGTTCTTTTGTGGCTGGCTTATT  
TCACTTGGCATAATGCCTTCAAGGTTTATCCACATTGTACATTTGACAGGATTTCTTCTTTTTAAAGGCTGAATAAT  
ATTCCATTGACTGTATATACCACATTTCTTTATCTATTCTGTGTTGATGGACATTTGGGATGCTTCCAGAACCTCT  
TGGCTATTGTGAATAATGCTGCTATGAACATGGGTGTACAAATATCTTTGAGATCCCCTTTGGTGGTAATTCTT  
ATGGTAATTCTGTTTTAGTTATTTGGGAAACCTGTGTACTGTTTTCCGTAATGACTGCACCGTTTTACATTACCACC  
AACAGTGCACAAGGGTTTTCACTTCTCTGCATCCTCCCAATACTTGTTATTTTTTTGTTCTTCTGATAGTGGCCATC  
ATGATGGGCGTGAGACGATATCTCATTGTGGTTTTGATTTGCATTTCCCTAATAATTGGCAATGTTGAGCATATTTT  
CATGTTCTTATTGGCCAATTGTATAACTTCTTTGGAGAAATGTCTGTGCAAGTCTTTGCCATTTTTAAAAATTGAG  
TTATTTGGTTTTTTGTTGTTGAGTTGTAGAAGTTCCTCATATATTCTGGATTTGGGCTCCTTATAAGATAGACGATT  
GCAATTATTTTCTCTCATTCTAGAGCTTGCCTTTTCACTTTGTTGATTGCTTCTTTGACACACAGACATTTTTAAGTT  
TGATGTAGTCCCCTTCTTCTAACGATCTTAAAGTGTACAGTTCAGTAGTGTAAAGTATATTCATCCAACCCTATC  
TTGCAGACCAGATGACAAACATATTAATGAAAGAAATACTACCAGTCATTGACGCAACAGAGTCTGAACATAGGC  
TTAGAGGCATTGAGAAACATTCCAAGATATTTATAAGCAAGAGCCACAGGAGCATGAATTCCTCAGAATATGTAGA  
ATTATCTAGATTTTAGCCTATCTGACAAGTTTCTCTCCCTATTACCATAACAAAAGTCTTTTAAACCACTGTATAAC  
TGAGATATTTAAGTTAATCACCTGCCTTGCAAAGAACCCTGACTAATGAGTAAATAAAGTTCAGACAGTTGTAAAG  
GGAAGACGGGATAGCTCTTTCACTGTAGAAAACATTATCATTATATACTATGTAACAGCGTGCAAATAATACAAAA  
TAATAATATAAACTATAGGCTATTAGACTAGTCTTTGAAAAATATTTCTGGAAGGCCGGGCACGGTGGCTCA  
CGCCTGTAATCCCAGCACTTTGGGAGGCCAAGGCGGGTGGATCACCTGAGGTCAGGAGTTCAAGACCAGCCTGG  
CCAACATAGTGAAACCCCATCTCTACTAAAAATACAAAAATTAGCTGGGCGTGGTGGCATGTGCCTGTAGTCCCAG  
TACTCAGGAGGCTGAGGCAGGAGAATCGCTTAAACCCGGGAGGTGGAGGTTGCAGTGAGCCAAGATAGTGCCA  
CTGCACTCCAGCCTGGGGACAGAGCGAGACTCCATCTCAAAAAAAAAAAAAAAAAAAGAAAAGAAAAATATTTCT  
GGAAATGTGCAATGAAAGAATTCTAAGTTCTAGGCACTTTAAGCATTTTTTCTTTTCTTTTCTTTTTTTTTTTATTA  
GACACAGAGTCTCACTCTGTTGCCAGGCTGGAGTGCAGTGGTGTGATCTTGGTTCACTACAACCACCACCTCCTG  
GGTTCAAGCGATTCTCCAGCCTCAGCTTCCCGAGTAGCTGGCATTACAGGTGCTCACCACCATGCCTGGCTAATTTT  
TTATTTGTAGTAGTGACAGGGTTTCATCATGTTGGCCAGGCTGGTCTCAAACCTCCTGACCTCAAGTGAGCTACCCG  
CCTCAGCCTCCCAAAGTGCTGGGATTACAGGTGTGAGCCACTGTGCC

>hsamiR1972

TCAGGCCAGGCACAGTGGCTCA

>ANU01178229.1\_7254x6952\_RF00100\_7SK



CCTCCCGGGTTCAAGTGTTCCTGCCTCAACCTCCTGAATTGCTGGGATTACAGCTGCGTGCCACCACATCTGGC  
TAATTTCTGTATTTTTAGTAGAGACAGGGTTTCACTATGTTGGCCAGGCTGGTCTCGAACTCCTGACCTCAGGTGG  
TCCGCTGCCTCAGCCTCCCAAATCGCTGGGATTACAGGCATGAGCCACTGTGCC

>CA5B

AGGCCAGGCACAGTGGCTCACACCTGTAATCCCAGCACTTTGGGAGGCCAAGACGGGTGGATCACGAGGTCAGA  
TCGAGACCATCCTGGTTAACACGGTGAACCCCTGTCTCTACTTAAAATACAAAAAATAGCCGGGTGTGGTGGCGG  
GCGCCTGTAGTCCCAGCTACTCAGGAGGCTGAGGCAGGAGAATGGCGTGAACCCGGGAGGCGGAGCTTGCAGT  
GAGCCGAGATCGCGCCACTGCACTCCAGCCCAGGCTGACAGCGCGACTCTGTCTCAAAAAATAAAAAAATAAAA  
AAAAATAAAAAACAAGACAGCTAGGAGGAAAGCCTGTATGCTTTGGAAAATGCATATCTTGTGTGTTTACCCTTT  
AAAGGTAATACTTTGAAACAGGTGAACTGCAGAAAGTTAACAAAGACTTCTTTTTTACCATGTTTACCTTTCT  
AAGAATTCTATGCATTTCTAGGGCATAACATGCAAAAGCCTTCACATTTCCCCCTTTTTAAAAGAGATATTTCTCAA  
CTTATACGTATACAGTTCAAGTAGTGTAAAGTACAATCACACTTGTGTTTGAACAGATCTCTAGAATTCTTGCAACAC  
AAGCTCTGTACCCACTAAATACAAATTCACCCTCTCCCCTCCCCAACCGTTGCTTGCAACCACCTTTCTACTTTCT  
ATTGTATGATTTTGACTACTTTCATACTTCACATGGAGGAATCATATAGCATTGTTCTTTTGTGGCTGGCTTATT  
TCACTTGGCATAATGCCTTCAAGGTTTATCCACATTGTACATTTGACAGGATTTCTTCTTTTTAAAGGCTGAATAAT  
ATTCCATTGACTGTATATACCACATTTCTTTATCTATTCATCTGTTGATGGACATTTGGGATGCTTCCAGAACCTCT  
TGGCTATTGTGAATAATGCTGCTATGAACATGGGTGTACAAATATCTTTGAGATCCCCTTTGGTGGTAATTCTT  
ATGGTAATTCTGTTTTAGTTATTTGGGAAACCTGTGTACTGTTTTCCGTAATGACTGCACCGTTTTACATTACCACC  
AACAGTGCACAAGGGTTTCACTTCTCTGCATCCTCCCAATACTTGTTATTTTTTTGTTCTTCTGATAGTGGCCATC  
ATGATGGGCGTGAGACGATATCTCATTGTGGTTTTGATTTGCATTTCCCTAATAATTGGCAATGTTGAGCATATTTT  
CATGTTCTTATTGGCCAATTGTATAACTTCTTTGGAGAAATGTCTGTGCAAGTCTTTGCCATTTTTAAAAATTGAG  
TTATTTGGTTTTTTGTTGTTGAGTTGTAGAAGTTCCTCATATATTCTGGATTTGGGCTCCTTATAAGATAGACGATT  
GCAATTATTTTCTCTCATTCTAGAGCTTGCCTTTTCACTTTGTTGATTGCTTCTTTGACACACAGACATTTTTAAGT  
TGATGTAGTCCCCTTCTTCTAACGATCTTAAAGTGTACAGTTCAGTAGTGTAAAGTATATTCATCCAACCCTATC  
TTGCAGACCAGATGACAAACATATTAATGAAAGAAATACTACCAGTCATTGACGCAACAGAGTCTGAACATAGGC  
TTAGAGGCATTGAGAAACATTCCAAGATATTTATAAGCAAGAGCCACAGGAGCATGAATTCCTCAGAATATGTAGA  
ATTATCTAGATTTTAGCCTATCTGACAAGTTTCTCTCCCTATTACCATAACAAAAGTCTTTTAAACCACTGTATAAC  
TGAGATATTTAAGTTAATCACCTGCCTTGCAAAGAACCTTGACTAATGAGTAAATAAAGTTCAGACAGTTGTAAAG  
GGAAGACGGGATAGCTCTTTCACTGTAGAAAACATTATCATTATATACTATGTAACAGCGTGCAAATAATACAAAA  
TAATAATATAAACTATAGGCTATTAGACTAGTCTTTGAAAAATATTTCTGGAAGGCCGGGCACGGTGGCTCA  
CGCCTGTAATCCCAGCACTTTGGGAGGCCAAGGCGGGTGGATCACCTGAGGTCAGGAGTTCAAGACCAGCCTGG  
CCAACATAGTGAAACCCCATCTCTACTAAAAATACAAAAATTAGCTGGGCGTGGTGGCATGTGCCTGTAGTCCCAG  
TACTCAGGAGGCTGAGGCAGGAGAATCGCTTAAACCCGGGAGGTGGAGGTTGCAGTGAGCCAAGATAGTGCCA  
CTGCACTCCAGCCTGGGGACAGAGCGAGACTCCATCTCAAAAAAAAAAAAAAAAAAGAAAAGAAAAATATTTCT  
GGAAATGTGCAATGAAAGAATTCTAAGTCTAGGCACTTTAAGCATTTTTTCTTTTCTTTTCTTTTTTTTTTTATTA  
GACACAGAGTCTCACTCTGTTGCCAGGCTGGAGTGCAGTGGTGTGATCTTGGTTCACTACAACCACCACCTCCTG  
GGTTCAAGCGATTCTCCAGCCTCAGCTTCCCGAGTAGCTGGCATTACAGGTGCTCACCACCATGCCTGGCTAATTTT  
TTATTTGTAGTAGTGACAGGGTTTCATCATGTTGGCCAGGCTGGTCTCAAACCTCTGACCTCAAGTGAGCTACCCG  
CCTCAGCCTCCCAAAGTGCTGGGATTACAGGTGTGAGCCACTGTGCC

>hsamiR1972

TCAGGCCAGGCACAGTGGCTCA

>ANU01178229.1\_7254x6952\_RF00100\_7SK

TGTTGCCAGGCTGGAGTGCAGTAGCACAATCTCACCTCACTGCAATCTCTGCCTCCCGGGTTCAAGTGTTTCTCCT  
GCCTCAACCTCCTGAATTGCTGGGATTACAGGTGCATGCCACCACATCTGGCTAATTTCTGTATTTTTAGTAGAGA  
CAGGGTTTTACTATGTTGGCCAGGCTGGTCTCGAACTCCTGACCTCAGGTGATCCGCCTGCCTCAGCCTCCCAAATT  
GCTGGGATTACAGGCATGAGCCACTGTGCCTGGCC

>NOL9

TCAGGCCAGGCGCAGTGGCTCACGCCTGTAATCCCAGCACTTTCGGAGGCCAAGGCGGGCGGATCACGAGGTCA  
GGAGTTCGAGACCAGCCTGACCAACATGGTGAAACCTGTCTCTACTAAAAATACAAAAATTAGCTGGGCGTGGT  
GGCATAACGCTGTAATCCCAGCTACTCAGGAGGCTGAGGCAGGAGAATCGCTTAAACCTGGGAGGCGGAAGTTG  
CAGTGAGCCGAGATCACTCCACTGCACCCAGCCTGGGCGACAGAGCTAGACTCTGTCTCAAAAAAAAAAAAAAA  
AAAGAAATTGCTTCAGCACTTTGGGAGGCCGAGGCAAGCGGATCACAAGGTCAGGAGATCGAGACCAGCCTAGC  
CAATACGGTGAAACCCATCTCTACTAAAAATATAAAAAATTAGCCAGGCATGGTGGCGCTCACCTGTAATCCCAGC  
TACTTGGGAGGCTGGGGCAGAAGAATCACTTGAACCCGGGAGGGGAGAGGCTGTAGTGAGCCAAGGTCGTGCC  
ACTGCACCCAGCCTGGGTGACAGAGCGAGACTCTGTCTCAAAAAAAAAAGAAAAAAAAAAAAAGAATAGCTCCAAT  
GGAGAACTCCTTACTACCTAATCTGACCCATAACAGACTGTGAAATGATAAAAAGTCCAATCTTGTCTTCTTCTA  
AATGCCCTTAAAGCCACTGCCACCAGCCGGGTGCGGTGGCTCATGCCTGTAATCCCAACACTTTGGGAGGCCAAG  
GCAGGTGGATCACCTGAGGACAGGAGTTCAAACCAGCCTGGCCAACATGGTGAAACCCCTTCTCTACTAAAAAT  
AGAAAATCAGCCAGGCATGGTGGCGCATGCCTGTAATCCCAGCTACTCGGGAGGTTGAGGCAAGAGAATCACTT  
GAACCCGGGAGGCGGAGGTGGCAGTGAGCCAGATTGCGCCACTGCACTCCAGCCTGGGCAACAAGAGCGAAAC  
TCCATCTCAAAAAAAAAAAAAAAAAAAAAAAAAAAGGATAAAAAGGCCACTGCCATCAATAATGGGATGAATTGTCAT  
CCTGGAGAATGGTGTCTGCTGCAGGTCTGACCCGCACAAGCTAGACCTGACAGAGGCCTTGGCTCCCTGTCTCCGA  
ACCTCCTCCCTAAACCCTGTACAGCTTCTGGGCCAACTCTAGCCCCAGTACGGCCACCTGACCCACAGCTGATAG  
CTCCCTCTAGAGGCAACGATTTTTCTTACTGATAGGGACTGAAGAAAAGACTTGACCTTCATACAGGCCCGCATT  
AAAGCCTGAAGGCAAACCTAGATTGAATGCAATGCAATTACAGGGCACCAGTTTCATTCTTCCAGAGCCTTGCTG  
CAAATGACCTCCAGTGAGTATAACTGTAAGATACACGAAAGTGGAGAAAGGCAAAACATTGATGGTGTATGGATTG  
TCTTAAATTTCTTACAAGGCCAGCACAGTAAACATCATATGAATGAGCCAGATTTCAACATAAATAAGGGGCAA  
CTAAGAAGCTAGACTCAATTGTCTCAAAGGTATCAAACCTAATCACCATAGCAAGGTTTCTGTGCTTATTTAAGT  
CCTTTGCTGTTGGGTCTAAGAGGTGCTGAGGGGCCACTGTAAAATACTAAAGACAATGATAACCAACAGTTGTAT  
AAGTGTATATAAGTGTTAAAACCCACACATCCTAATAGTCTTACAATGTGATCATGCTGGGAAGATGGAATTCTGT  
CAAAGCGTGGTACAATACCAGTTTGAACCTCAGCCCAGGAAGTATCCTGCTGTCTTAAATGCAGAAATGATGT  
GACCTGGTCCCATCACCCGTTTACACAAACCACTTCAAACCTAGAGGACAGAGTCGGAAGCACCAGGGAGAACGT  
GGAGAAATGGCAGTCTGGTACCAGCCGCCCGCACCCAGGAAAAAGCTCTAAATGGCAGGGTTGTTTCATAGGT  
GCAAGTTCAGGTCCAGCCTCCACAGGCAATAATGGAGCTTTCCCAAGAGCTGGTCTGCCAGTCTTCTTCTTCAA  
AACAGCCCAGTCTCCAGCTCTGCCCTGTGGTTGTCTCTGGCCTCAGATCAGAAGTCAATTTGGACAAATCTACTTTT  
ATAAGAGCCCCCAGAAGAGGTTTTCCAGATTATTATTTTTTTTTTTTGGAGATGGAGTCTTGCTCTTGTTGCCAGGC  
TGGAGTGCAGTGGCGTGACCTCGGCTCACTGCAAGCTCCGCCTCCTGGGTTTCATGCCATTCTCCTGCCTCAGCCTC  
CTGAGTAGCTGGGACTATAGGCGCCACCACCACGCCAGCTAGTTTTTTGTATTTTTAGTAGAGACGGAGTTTCA  
CTGTGTTAGCCAGGATGGTCTCAATCTCCTGACCTCGTGAACCGCCTGCCTTGGCCTCCCAAAGTGCTGGAATTAC  
AGGCGTGAGCCACTGCGCCTGGCC

>hsamiR548a\_3p

CAAACTGGCAATTACTTTTGC

>MADE1

AAAACCTGCAATTACTTTTGCACC

>CD38

CAAAACTTGCAATTACTTTTGCACC

>hsamiR548h\_5p

AAAAGTAATCGCGGTTTTTGTC

>MADE1

GTGCAAAAAGTAATTCCAGTTTTTACCATTAAGTAATGACAAAAACCGCGATTACTTTTGCACC

>KATNAL1

GTGCAAAAAGTAATTGCGGTTTTTGCCATTGAAAGTAATGGAAAAACCACAATTACTTTTGCACC

>hsamiR548a\_3p

CAAAACTGGCAATTACTTTTGC

>MADE1

TGGTGCAAAAAGTAATTGCCAGTTTTGCCATTGAAAGTAATGGTAAAACCGCAATTACTTTTGCACC

>KATNAL1

TGGTGCAAAAAGTAATTGCGGTTTTTGCCATTGAAAGTAATGGAAAAACCACAATTACTTTTGCACC

>hsamiR548a\_5p

AAAAGTAATTGCGAGTTTTACC

>MADE1

TGGTGCAAAAAGTAATTGCCAGTTTTGCCATTGAAAGTAATGGTAAAACCGCAATTACTTTTGCACC

>KATNAL1

TGGTGCAAAAAGTAATTGCGGTTTTTGCCATTGAAAGTAATGGAAAAACCACAATTACTTTTGCACC

>hsamiR548a\_3p

CAAAACTGGCAATTACTTTTGC

>MADE1

AAAAACCCAATTACTTTTGCACAAACC

>KATNAL1

AAAAACCACAATTACTTTTGCACCAACC

>hsamiR548d\_3p

CAAAAACCACAGTTTCTTTTGC

>MADE1

AAAAACCACAATTACTTTTGCACCAACC

>KATNAL1

AAAAACCACAATTACTTTTGCACCAACC

>hsamiR548h\_3p

CAAAAACCGCAATTACTTTTGC

>MADE1

AAAAACCGCGATTACTTTTGCACCAACC

>KATNAL1

AAAAACCACAATTACTTTTGCACCAACC

>hsamiR548b\_5p

AAAAGTAATTGTGGTTTTGGCC

>MADE1

CAAAAGCAACTGAGGTTCTTGCCATTGAAAATAAAGGCCAAAACCACAATTACTTTTGCGCCAACC  
>KATNAL1

CAAAAGTAATTGCGGTTTTTGCCATTGAAAGTAATGGAAAACCACAATTACTTTTGCACCAACC

>hsamiR548k

AAAAGTACTTGCGGATTTTGCT

>MADE1

GCAAAAATAATTGCGGTTTTTGCCATTAAGTAAAGCAAATCCGCAAGTACTTTTGCACCAACC

>KATNAL1

GCAAAAGTAATTGCGGTTTTTGCCATTGAAAGTAATGGAAAACCACAATTACTTTTGCACCAACC

>hsamiR548d\_5p

AAAAGTAATTGTGGTTTTTGCC

>MADE1

TTAGGTTGGTGCAAAAGAACTGTGGTTTTTGCCATTACTTTCAATGGCAAAAACCACAATTACTTTTGCACCAACC

>KATNAL1

TTAGGCTGGTGCAAAAGTAATTGCGGTTTTTGCCATTGAAAGTAATGGAAAACCACAATTACTTTTGCACCAACC

>hsamiR548i

AAAAGTAATTGCGGATTTTGCC

>MADE1

TAGGCTGGTACAAAATAATTGCTATTTTGGCATTACTTTTAATGGCAAAATCCGCAATTACTTTTGCACCAACC

>KATNAL1

TAGGCTGGTGCAAAAGTAATTGCGGTTTTTGCCATTGAAAGTAATGGAAAACCACAATTACTTTTGCACCAACC

>hsamiR548i

AAAAGTAATTGCGGATTTTGCC

>MADE1

TAGGTTGGTGCAATAATATTTGTGGTTTTTGCCGTTAAAGTATGGCAAAATCCGCAATTACTTTTGCACCAACC

>KATNAL1

TAGGCTGGTGCAAAAGTAATTGCGGTTTTTGCCATTGAAAGTAATGGAAAACCACAATTACTTTTGCACCAACC

>hsamiR548d\_3p

CAAAAACCACAGTTTCTTTTGC

>MADE1

TTAGGTTGGTGCAAAAGAACTGTGGTTTTTGCCATTACTTTCAATGGCAAAAACCACAATTACTTTTGCACCAACC

>KATNAL1

TTAGGCTGGTGCAAAAGTAATTGCGGTTTTTGCCATTGAAAGTAATGGAAAACCACAATTACTTTTGCACCAACC

>hsamiR548aa

AAAAACCACAATTACTTTTGCACCA

>MADE1

TTAGGTTGGTGCAAAAGTAATTGTGGTTTTTGCCATTGAAAGTAATGGCAAAAACCACAGTTTCTTTTGCACCAACC

>KATNAL1

TTAGGCTGGTGCAAAAGTAATTGCGGTTTTTGCCATTGAAAGTAATGGAAAACCACAATTACTTTTGCACCAACC

>hsamiR1285\_3p

TCTGGGCAACAAAGTGAGACCT

>AluJ  
CCAGGAGTTTGAGACCAGCCTGGGCAACAAAGTGAGATCCTATCTCTAC  
>RP11-111M22.2.1  
CCAGGAGTTCAAGACCAGCCTGGGCAACATAGTGAGACCCTGTCTCTAC

>hsamiR548a\_3p  
CAAAACTGGCAATTACTTTTGC  
>MADE1  
AAAAACCCCAATTACTTTTGCACAAACCTAATAC  
>AL591684.1  
AAAAACCGCAATTACTTTTGCACCAACCTAATAC

>hsamiR548a\_3p  
CAAAACTGGCAATTACTTTTGC  
>MADE1  
AAAAACCCCAATTACTTTTGCACAAACCTAATAC  
>AL603965.1  
AAAAACCGCAATTACTTTTGCACCAACCTAATAC

>hsamiR548a\_3p  
CAAAACTGGCAATTACTTTTGC  
>MADE1  
GGCAAAAATCACAATTACTTTTGCACCAACTTAATAC  
>AL591684.1  
GGCAAAAACCGCAATTACTTTTGCACCAACCTAATAC

>hsamiR548a\_3p  
CAAAACTGGCAATTACTTTTGC  
>MADE1  
GGCAAAAATCACAATTACTTTTGCACCAACTTAATAC  
>AL603965.1  
GGCAAAAACCGCAATTACTTTTGCACCAACCTAATAC

>hsamiR1285\_3p  
TCTGGGCAACAAAGTGAGACCT  
>AluJ  
TCTCTACAAATAATAAAAAAATTAGCTGGGTGTGGTGGCATATGCCTGTAGTCCCACTACTTGGGAGGCTGAGG  
CAGGAGGACTGCCTGAGCCTAGGAG  
>ZNF528  
TCTCTACTAAAAATACAAAAATGAACTGGGTGTGGTGGCGCACGTCTGTAGTCTCAGCTACTTAGGAGGCTAAGG  
CAGAAGGACTGCTTGAGCCCAGGAGGCGGAGGGTGCAGTGAGCCAAGAACACACCACTACTCCAGCCTGGGC  
AACAGAGTGAGAC

>hsamiR548g\_5p  
TGCAAAAGTAATTGCAGTTTTTG  
>MADE1  
TGGTACAAAAGTAATTACAGTTTTGCCATAGAACGTAATGCAAAAACCTGCAATTACTTTTGCAC  
>HLA-DMB

TGGTGCAAAAAGTAATTGCGGTTTTTGCCACTGAAAGTAATGGCAAAAAGTCAATTACTTTTGAC

>hsamiR548g\_3p

AAAAGTCAATTACTTTTGTAC

>MADE1

TGGTACAAAAGTAATTACAGTTTTGCCATAGAACGTAATGCAAAAAGTCAATTACTTTTGAC

>HLA-DMB

TGGTGCAAAAAGTAATTGCGGTTTTTGCCACTGAAAGTAATGGCAAAAAGTCAATTACTTTTGAC

>hsamiR548aa

AAAAACCACAATTACTTTTGACCA

>MADE1

TAATGGCAAAAACCACAGTTTCTTTTGAC

>SMU1

TAATGGCAAAAACCGCAATTACTTTTGAC

>hsamiR603

CACACTGCAATTACTTTTGC

>MADE1

TGTGCCATTACTTTTAAATGGGAAGCACTGCAATTACTTTTGAC

>SMU1

TGTGCCATTACTTTTAAATGGCAAAAACCGCAATTACTTTTGAC

>hsamiR548g\_5p

TGCAAAAAGTAATTGCAGTTTTTG

>MADE1

TGGTACAAAAGTAATTACAGTTTTGCCATAGAACGTAATGCAAAAAGTCAATTACTTTTGAC

>KATNAL1

TGGTGCAAAAAGTAATTGCGGTTTTTGCCATTGAAAGTAATGGAAAAACCACAATTACTTTTGAC

>hsamiR1271\_3p

AGTGCCTGCTATGTGCCAGGCA

>L2B

TCAACAAATATTTACTGAGTGCTTGTAGGTGCCAAGCAC

>CAPRIN1

TCAACAAATATTTATTGAGTGCCTACTATGTGCCAGGCA

>hsamiR1273d

GAACCCATGAGGTTGAGGCTGCAGT

>AluSq

TAATTTTTGTATTATTAGTAGAGACAGGGTTTACCATGTAGGCCAGGCTGGTCTCAAACCTCCTGACCTCATATGAT

CCGCCACCTCAGTCTCCCAAAGTGCTAGGATTACAGGTGTGAGCCAC

>GPR157

GAGGTGGAGGCTGCAGTGAGCCATGATTGCATCACTGCACTCCAGACTGGGTATGATGCTCCAGACAGCAAAACC

CTGCCTCACAATAAATAAATAAATAAAGAAAGTAACAGCCCCTCCTGGACTTGTTTTATTTTTTGGAGATGGAGTCT

TGCTCTGTCAACCAGGCTGGAGTGAGTGGTGCAGTCTCGGCTCACTGCAACCTCTGCCTTCTGGGTTCAAGCAAT

TCTCCTGCCTCAGCCTCCTGAGTAGCTGGCACTACAGGCACACGAAACCACATCCAACCTATTTTTTTTTTTTTTTGTAT

ATTTAGTAGAAACAGGGTTTACCATGTTGGCCAGGCTGGTCTCAAACCTCCTGACCTCAGGTGATCTGCCACCTT

GGTCTCCCAAAGTGCTGGGATTACAGGCGTGAGCCACTGCGCCTGGCCCCCTCTGGACTTTTAGGATGTGACTTC  
CTTCCCATCCAGCCTTTCTGTCTGAGCACTACCCACCCAGCTAGACTGACTTGGTAACTGGATCTAAGAAGGAGGC  
GATATTGCTGTTTTCGAGGTCGATGGGCCAGGGGCTGGGCTAAGGCACCTTAGACAAGCCCCTGCCCTGCCACC  
TGGTCAACCACATTACAGTGATCACTCATCTGTGGCAAGAGGTGGGCAGCGGAGGAAGCTGACTAGAGATACST  
GATGTATAACTTTTTGGAGGTTTTTACAAAAGCAGATACAGTGGCCAGTGGCATCAAAGAAATGGAATGAGAAT  
TGAGCCCAGGCACCCGGAGCAGGTATTTCTGAGCCCTCAGCTCCCTCTACAGGCCTTCTGACCACAGCCAGTC  
CATCTGGGGAGCCATGTCTCAGCTCTGGCTTGGGTACAGCAGGGAGGGCTCCAGAGGCCCTGCTGAGCAGGGT  
TGATCTAACACTATTCCTCTGTGGCCTATATTGTCTTTTCTTTTACCTGTTAATCATGTTCTTTTTGCAGCAAGC  
AAATTCCTGAATTTTCGCTCCCTCTAGAAGCTCAAGTGAGGGTCTTTACCAGAGACATACCCAGAGATTTGCTGTA  
ACGTCTCAGGGGAATCCAGAATCACTTACAGAGGCTATTTCTGCCAAGTGGCTTTCCCTGGAGCAGCCCAGAGC  
TCTCTTCAATCCTAAGGGGATGTCTGTCTCACTAATTTCCATCAAGAAATCTGTTTTCTTGGACAGGCACAGTGGC  
TCATGCCTGCAATCGAAGCATTGTTGGGAGGCTGAGGTGGGTGGATCACCTGAGGTGAGGAGTTCGAGACCAGCCT  
GGCCAACATGGTGAAAACCCGTCTCTACTGAAAATACAAAAATTAGCCGAGCATGGTGGCGCATGCCTGTAATC  
CCAGCAGCTTGGGATTGGGAAGCAGGAGAATCGCTTGAACCTGGGAGGCGGTGGTTGCAGTGAGTCAAATTC  
ACCACTGCACTCCAGCCTGGGCAATAGAGTGAGACTCCATCTCAAAAAAAAAAAAAAAAAAAAAAAAAAGAAAGCGACAA  
AAAGAAATCCATTTTACAGGAAACCAAAAATGAGCATTGTTGGACTCAGTCTGCTAAATGATTATTCCTTCTGAT  
ACAGATTTTGGTTTTGAGAGTCAAACAGGGATCGGCAGCACAGCGTGACTTCGGTTTTGATTACAGAACATTTTAC  
TAGGCTCAGAAAATCATGCTTTGTCGAGTTCTGATGGATTCCAAGGGAAATCACCTATCAGGTAAAGCTGTACTTT  
CTCTACCAAGACCCTGGAGGTAGCATTCCACTTCCATTCTTTGCCGATGGCTCCTGTGACTGAACACAGAAGCTG  
TTTTCTGAAATAAGACGAAAGCGTTTGTGGAAGACCCACAGAATAAAAAATAGAGATACAGGTGCTTACTTTCAATT  
CTTTCTTTTAAATGTAAATAATCGCTCCATGCTCCATGCCGCCACTTACCTCAGCTGAATACAAAACAGCTGAATCC  
TTTTGAATCCTTTGTTTTTTCTTTTTTGGAGACAGGGTCTGCTGTTGCCAGGCTGGAGTGGCAGTGGTGCCATC  
CCAGTTCAATGAAGCCTCAAATCCCTGGGCTCAAGGGATCCTCCCGTCTCAGCCTCCTGAGTAGTAGGGACTACAG  
GCACGCACCACCACATCAGCTCCGGGCGACAGAATGAGGCTCCTTTTTAAAAAAAAAAAAAAAAAAAAAACTGAC  
TCTGAAGCTTAAAACCTTACCTTTAGGAAGAAATCGTATTTGTTTGTGAGACCGAGTTTCACTCTTGTGCCCA  
GGCTGGAGTGCAATGGTGTGGTCTTGGCTCACCGCAACCTCCGCTCCAGGTTCAAGAGATTCTCCTGCCTCAGC  
CTCCAAAGACCTGGGATTACAGACGTGCATCCATGCCTGGCTAATTTTTGTATTTTGTAGTAGAGACAGGGTTTC  
ACCATGTTGGCCAGGCTGGTCTTGAACCTGACCTCAGGTGATCTGCCTGCCTGGCCTCCCAAAGTGCTAGGGT  
TACAGGTGTGAGCCAC

>hsamiR548d\_5p

AAAAGTAATTGTGGTTTTTGCC

>MADE1

TGGTGCAAAAAGAACTGTGGTTTTTGCCATTACTTTTACAGGC AAAAACCACAATTACTTTTGCACCAAC

>MTMR6

TGGTGCAAAAAGTAATTGCGGTTTTTGTTCATCACTTTCAATGGCAAAAAGCCCAATTACTTTTGCAGCAAC

>hsamiR548i

AAAAGTAATTGCGGATTTTGCC

>MADE1

TAGGCTGGTACAAAATAATTGCTATTTTGCATTACTTTTAAATGGCAAAATCCGCAATTACTTTTGCACCAAC

>MTMR6

TAGGTTGGTGCAAAAAGTAATTGCGGTTTTTGTTCATCACTTTCAATGGCAAAAAGCCCAATTACTTTTGCAGCAAC

>hsamiR548h\_5p  
AAAAGTAATCGCGGTTTTTGTC  
>MADE1  
TTAGGTTGGTGCAAAAAGTAATTGCAGTTTTTGCTATTACTTTCAATGACAAAAACCGCGATTACTTTTGCACCAAC  
>MTMR6  
TTAGGTTGGTGCAAAAAGTAATTGCGGTTTTTGTCATCACTTTCAATGGCAAAAAGCCCCAATTACTTTTGCAGCAAC

>hsamiR548d\_5p  
AAAAGTAATTGTGGTTTTTGCC  
>MADE1  
TATTAGGTTGGTGCAAAAAGAACTGTGGTTTTTGCCATTACTTTCAATGGCAAAAACCACAATTACTTTTGCACCAA  
C  
>MTMR6  
TATTAGGTTGGTGCAAAAAGTAATTGCGGTTTTTGTCATCACTTTCAATGGCAAAAAGCCCCAATTACTTTTGCAGCAA  
C

>hsamiR548w  
AAAAGTAACTGCGGTTTTTGCCCT  
>MADE1  
TATTAGATTGGTGCAAAAAGTAATTGTGGGTTTTTGCCATTATGTTGAAAGGCCAAAAACCGCAGTTACTTTTGCACCA  
AC  
>MTMR6  
TATTAGGTTGGTGCAAAAAGTAATTGCGGTTTTTGTCATCACTTTCAATGGCAAAAAGCCCCAATTACTTTTGCAGCAA  
C

>hsamiR548a\_3p  
CAAAACTGGCAATTACTTTTGC  
>MADE1  
TAATGGCAAAAATCACAATTACTTTTGCACCAAC  
>HLA-DMB  
TAATGGCAAAAATGCAATTACTTTTGCACCAAC

>hsamiR548a\_3p  
CAAAACTGGCAATTACTTTTGC  
>MADE1  
TTTTAATGGCAAAAATCACAATTACTTTTGCACCAAC  
>LRRC55  
TTTTAATGGCAAAAACCGCAATTACTTTTGCACCAAC

>hsamiR548a\_3p  
CAAAACTGGCAATTACTTTTGC  
>MADE1  
AAAAATCACAATTACTTTTGCACCAAC  
>KATNAL1  
AAAAACCACAATTACTTTTGCACCAAC

>hsamiR548i  
AAAAGTAATTGCGGATTTTGCC



>MADE1  
TGGTACAAAAATAATTGCTATTTTTGCCATTA  
>DENND4C  
TGGTACAAAAATAATTGCGGTTTTTGCCATTA

>hsamiR548w  
AAAAGTAACTGCGGTTTTGCCT  
>MADE1  
TTGGTGCAAAAGTAATTGTGGGTTTTGCCATTA  
>DENND4C  
TTGGTACAAAAATAATTGCGGTTTTTGCCATTA

>hsamiR548q  
GCTGGTGCAAAAGTAATGGCGG  
>MADE1  
TTAGGTTGGTGAAAAAGTAATCATGCTTTTTGCCATTA  
>RABL5  
TTAGGTTGGTGCAAAAGTAATAGTGGCTTTTTGCCATTA

>hsamiR1277\_5p  
AAATATATATATATATGTACGTAT  
>EnSpm-8\_HM  
TACATATATATATATAT  
>SRP72  
GTTTATATATATATATATATGTA

>hsamiR1277\_5p  
AAATATATATATATATGTACGTAT  
>EnSpm-8\_HM  
TACATATATATATATAT  
>ZBED3  
TACATATATATATATATATATATGTA

>hsamiR1277\_5p  
AAATATATATATATATGTACGTAT  
>EnSpm-8\_HM  
TACATATATATATATAT  
>NRF1  
TACATATATATATATATATGTA

>hsamiR1277\_5p  
AAATATATATATATATGTACGTAT  
>EnSpm-8\_HM  
ATACGTACATATATATATATAT  
>SENP1  
ATACATACATATATATATATATATGTA

>hsamiR1277\_5p

AAATATATATATATATGTACGTAT

>EnSpm-8\_HM

TACATATATATATATAT

>YAF2

TACATATATATATATATGTA

>hsamiR1304\_3p

TCTCACTGTAGCCTCGAACCCC

>ALU\_SINE1\_7SL\_Primates

GTGGCAGGATCACATCTCACTGTAGCCTCAAACCGCTGGGCTCAAGTGTTTCTCCTGCCTTAGCCTCCAGAGTA

>DFFA

GTGGCACGATCACAGCTCATTGTAGCCTCGAACTCCTGGGCTCAAGTGATCCTTCTGCCTTAGCCTCCCGAGTA

>hsamiR28\_5p

AAGGAGCTCACAGTCTATTGAG

>L2\_Plat1o

CCTGCCCTCCAGGAGCTCACAATCTA

>EPC2

CCTGCCCTCAAGGAGCTCACAGTCTA

>hsamiR708\_5p

AAGGAGCTTACAATCTAGCTGGG

>L2\_Plat1r

GTCCCTGCCCTCTAGAAGCTCACAGTCTA

>DOCK7

GTCCCTGCCCTCAAGGAGCTCACAATCTA

>hsamiR548n

CAAAAGTAATTGTGGATTTTGT

>MADE1

TATTAGTTGGTGCAAAAGTAATTGCGGGTTTTGCTATTTTTAACGACAAAATCCACAATTACTTTTGCACCAACCT  
A

>ALG10B

TATTAGTTGGTACAAAAGTAATTGTGGTTTTGCCATTACTTTCAATGGCAAAAACCACAATTACTTTTGCACCTAAC  
CTA

>hsamiR548v

AGCTACAGTTACTTTTGCACCA

>MADE1

AAAACCGCAATTACTTTTGTCAAACCTA

>FAM23B.1

AAAACCTCAATTACTTTTGCACCAACCTA

>hsamiR548v

AGCTACAGTTACTTTTGCACCA

>MADE1

AAAACCGCAATTACTTTTGTCAAACCTA

>TMEM236

AAAACCTCAATTACTTTTGCACCAACCTA

>hsamiR548v

AGCTACAGTTACTTTTGCACCA

>MADE1

AAAACCGCAATTACTTTTGTCAAACCTA

>HLA-DMB

AAAACCTGCAATTACTTTTGCACCAACCTA

>hsamiR548v

AGCTACAGTTACTTTTGCACCA

>MADE1

AAAACCGCAATTACTTTTGTCAAACCTA

>LRRC55

AAAACCGCAATTACTTTTGCACCAACCTA

>hsamiR548v

AGCTACAGTTACTTTTGCACCA

>MADE1

AAAACCGCAATTACTTTTGTCAAACCTA

>AL591684.1

AAAACCGCAATTACTTTTGCACCAACCTA

>hsamiR548v

AGCTACAGTTACTTTTGCACCA

>MADE1

AAAACCGCAATTACTTTTGTCAAACCTA

>AL603965.1

AAAACCGCAATTACTTTTGCACCAACCTA

>hsamiR548x\_3p

TAAAACTGCAATTACTTTC

>MADE1

GCAAAAACTGCAATTACTTTTGCCTAACCTA

>LRRC55

GCAAAAACCGCAATTACTTTTGCACCAACCTA

>hsamiR548a\_3p

CAAACTGGCAATTACTTTTGC

>MADE1

TAATGGTAAAACTCGCAATTACTTTTGCACCGACCTA

>LRRC55

TAATGGCAAAAACCGCAATTACTTTTGCACCAACCTA

>hsamiR548h\_3p

CAAAAACCGCAATTACTTTTGC

>MADE1

TAATGACAAAAACCGCGATTACTTTTGCACCAACCTA

>LRRC55  
TAATGGCAAAAACCGCAATTACTTTTGCACCAACCTA

>hsamiR548aa  
AAAAACCACAATTACTTTTGCACCA  
>MADE1  
TAATGGCAAAAACCGCAATTACTTTTGCACCAACCTA  
>LRRC55  
TAATGGCAAAAACCGCAATTACTTTTGCACCAACCTA

>hsamiR548a\_3p  
CAAACTGGCAATTACTTTTGC  
>MADE1  
ATATTAGTTTGGTGCAAAAGTAATTGCCAGTTTTCATTACTTTTAACGGCAAAAACCCCAATTACTTTTGCACA  
AACCTA  
>LRRC55  
ATATTAGATTGACGCAAAAGTAATTGGGATTTTGTATCATTTTAAATGGCAAAAACCGCAATTACTTTTGCACCA  
ACCTA

>hsamiR548v  
AGCTACAGTTACTTTTGCACCA  
>MADE1  
AAAACCGCAATTACTTTTGTCAAACCTA  
>ANKRD5  
AAAACCACAATTACTTTTGCACCAACCTA

>hsamiR548v  
AGCTACAGTTACTTTTGCACCA  
>MADE1  
AAAACCGCAATTACTTTTGTCAAACCTA  
>TCEANC2  
AAAACCACAATTACTTTTGCACCAACCTA

>hsamiR1277\_5p  
AAATATATATATATGTACGTAT  
>EnSpm-8\_HM  
TACATATATATATATAT  
>SRP72  
GTTTATATATATATATA

>hsamiR1277\_5p  
AAATATATATATATGTACGTAT  
>EnSpm-8\_HM  
TACATATATATATATAT  
>SRP72  
TACATATATATATATATATA

>hsamiR1277\_5p

AAATATATATATATATGTACGTAT

>EnSpm-8\_HM

TACATATATATATATAT

>ITPRIPL2

TACATATATATATATATA

>hsamiR620

ATGGAGATAGATATAGAAAT

>EnSpm\_7\_HM\_EnSpm\_Hydra\_magnipapillata

TATATATATATACGGAGCTAGATATAGATATATATA

>MRPL32

TATATATATATATAGAGATAGATATAGATATATATA

>hsamiR548a\_3p

CAAAACTGGCAATTACTTTTGC

>MADE1

CAATTACTTTTGCACCGACCTAATA

>ALG10B

CAATTACTTTTGCCTAACCTAATA

>hsamiR548a\_3p

CAAAACTGGCAATTACTTTTGC

>MADE1

CAATTACTTTTGCACCGACCTAATA

>ALG10

CAATTACTTTTGCCTAACCTAATA

>hsamiR548x\_3p

TAAAAACTGCAATTACTTTC

>MADE1

GCAAAAACTGCAATTACTTTTGCCTAACCTAATA

>SMU1

GCAAAAACCGCAATTACTTTTGCCTAACCTAATA

>hsamiR548a\_3p

CAAAACTGGCAATTACTTTTGC

>MADE1

TAATGGTAAAACTCGCAATTACTTTTGCACCGACCTAATA

>SMU1

TAATGGCAAAAACCGCAATTACTTTTGCCTAACCTAATA

>hsamiR548aa

AAAAACCACAATTACTTTTGCACCA

>MADE1

TAATGGCAAAAACCGCAATTACTTTTGCACCAACCTAATA

>SMU1

TAATGGCAAAAACCGCAATTACTTTTGCCTAACCTAATA

>hsamiR548a\_3p  
CAAAACTGGCAATTACTTTTGC  
>MADE1  
TTACTTTTAATGGCAAAAATCACAATTACTTTTGCACCAACTTAATA  
>SMU1  
TTACTTTTAATGGCAAAAACCGCAATTACTTTTGCCTAACCTAATA

>hsamiR548a\_3p  
CAAAACTGGCAATTACTTTTGC  
>MADE1  
TGCCATTACTTTTAACGGCAAAAACCCCAATTACTTTTGCACAAACCTAATA  
>SMU1  
TGCCATTACTTTTAATGGCAAAAACCGCAATTACTTTTGCCTAACCTAATA

>hsamiR548u  
CAAAGACTGCAATTACTTTTGC  
>MADE1  
AAAAACCACATTACTTTTGCACCATCCTAATA  
>ALG10  
AAAAACCACAATTACTTTTGCCTAACCTAATA

>hsamiR548a\_3p  
CAAAACTGGCAATTACTTTTGC  
>MADE1  
GTTTTGTCGTTACTTTTAATGGCAAAAATCACAATTACTTTTGCACCAACTTAATA  
>ALG10  
GTTTTGCCATTACTTTCAATGGCAAAAACCACAATTACTTTTGCCTAACCTAATA

>hsamiR548a\_3p  
CAAAACTGGCAATTACTTTTGC  
>MADE1  
GTTTTGCCATTACTTTTAACGGCAAAAACCCCAATTACTTTTGCACAAACCTAATA  
>ALG10  
GTTTTGCCATTACTTTCAATGGCAAAAACCACAATTACTTTTGCCTAACCTAATA

>hsamiR548a\_3p  
CAAAACTGGCAATTACTTTTGC  
>MADE1  
TTGGTGCAAAAGTAATTGCCAGTTTTGTCGTTACTTTTAATGGCAAAAATCACAATTACTTTTGCACCAACTTAATA  
>ALG10B  
TTGGTACAAAAGTAATTGTGGTTTTGCCATTACTTTCAATGGCAAAAACCACAATTACTTTTGCCTAACCTAATA

>hsamiR548aa  
AAAAACCACAATTACTTTTGCACCA  
>MADE1  
TTAGGTTGGTGCAAAAGTAATTGTGGTTTTGCCATTGAAAGTAATGGCAAAAACCACAGTTTCTTTTGCACCAACC  
TAATA  
>ALG10B

TTAGGTTGGTACAAAAGTAATTGTGGTTTTGCCATTACTTTCAATGGCAAAAACCACAATTACTTTTGCCTAACCT  
AATA

>hsamiR548a\_3p

CAAACTGGCAATTACTTTTGC

>MADE1

TATTAGTTTGGTGCAAAAGTAATTGCCAGTTTTGCCATTACTTTAACGGCAAAAACCCAATTACTTTTGCACAA  
ACCTAATA

>ALG10B

TATTAGTTGGTACAAAAGTAATTGTGGTTTTGCCATTACTTTCAATGGCAAAAACCACAATTACTTTTGCCTAAC  
CTAATA

>hsamiR548d\_3p

CAAAAACCACAGTTTCTTTTGC

>MADE1

TTATTAGTCTGGTGCAAAAGAACTGTGGTTTTGCCATTACTTTTACAGGCAAAAACCACAATTACTTTTGCACCA  
ACCTAATA

>ALG10B

TTATTAGTTGGTACAAAAGTAATTGTGGTTTTGCCATTACTTTCAATGGCAAAAACCACAATTACTTTTGCCTAA  
CCTAATA

>hsamiR548d\_5p

AAAAGTAATTGTGGTTTTTGC

>MADE1

TTATTAGTCTGGTGCAAAAGAACTGTGGTTTTGCCATTACTTTTACAGGCAAAAACCACAATTACTTTTGCACCA  
ACCTAATA

>ALG10B

TTATTAGTTGGTACAAAAGTAATTGTGGTTTTGCCATTACTTTCAATGGCAAAAACCACAATTACTTTTGCCTAA  
CCTAATA

>hsamiR548aa

AAAAACCACAATTACTTTTGCACCA

>MADE1

TTAGGTTGGTGCAAAAGTAATTGTGGTTTTGCCATTGAAAGTAATGGCAAAAACCACAGTTTCTTTTGCACCAACC  
TAATA

>ALG10

TTAGGTTGGTAAAAAGTAATTGTGGTTTTGCCATTACTTTCAATGGCAAAAACCACAATTACTTTTGCCTAACCT  
AATA

>hsamiR548aa

AAAAACCACAATTACTTTTGCACCA

>MADE1

AATGGCAAAAACCACAGTTTCTTTTGCACCAACCTAATA

>TLR10

AATGGCAAAAACCACAATTAGTTTTGCACCAACCTAATA

>hsamiR548a\_3p

CAAACTGGCAATTACTTTTGC

>MADE1  
CAATTACTTTTGCACCGACCTAATA  
>ANKRD5  
CAATTACTTTTGCACCAACCTAATA

>hsamiR548a\_3p  
CAAAACTGGCAATTACTTTTGC  
>MADE1  
AAAAACCCCAATTACTTTTGCACAAACCTAATA  
>FAM23B.1  
AAAAACCTCAATTACTTTTGCACCAACCTAATA

>hsamiR548a\_3p  
CAAAACTGGCAATTACTTTTGC  
>MADE1  
AAAAACCCCAATTACTTTTGCACAAACCTAATA  
>TMEM236  
AAAAACCTCAATTACTTTTGCACCAACCTAATA

>hsamiR548h\_3p  
CAAAAACCGCAATTACTTTTGCA  
>MADE1  
AATGACAAAAACCGCGATTACTTTTGCACCAACCTAATA  
>FAM23B.1  
AATGGCAAAAACCTCAATTACTTTTGCACCAACCTAATA

>hsamiR548h\_3p  
CAAAAACCGCAATTACTTTTGCA  
>MADE1  
AATGACAAAAACCGCGATTACTTTTGCACCAACCTAATA  
>TMEM236  
AATGGCAAAAACCTCAATTACTTTTGCACCAACCTAATA

>hsamiR548a\_3p  
CAAAACTGGCAATTACTTTTGC  
>MADE1  
ACTTTTAATGGCAAAAATCACAATTACTTTTGCACCAACTTAATA  
>FAM23B.1  
ACTTTCAATGGCAAAAACCTCAATTACTTTTGCACCAACCTAATA

>hsamiR548a\_3p  
CAAAACTGGCAATTACTTTTGC  
>MADE1  
ACTTTTAATGGCAAAAATCACAATTACTTTTGCACCAACTTAATA  
>TMEM236  
ACTTTCAATGGCAAAAACCTCAATTACTTTTGCACCAACCTAATA

>hsamiR548a\_3p



CAAAACTGGCAATTACTTTTGC

>MADE1

GCAATTACTTTTGCACCGACCTAATA

>SUMF1

GCAATTACTTTTGCACCAACCTAATA

>hsamiR548f

AAAAACTGTAATTACTTTT

>MADE1

AAAAACTGCAATTATGTTTCGCACCAACCTAATA

>SUMF1

AAAAACTGCAATTACTTTTGCACCAACCTAATA

>hsamiR548g\_3p

AAAACTGTAATTACTTTTGTAC

>MADE1

GCAAAAACTGCAATTACTTTTGCACCTAATCTAATA

>SUMF1

GCAAAAACTGCAATTACTTTTGCACCAACCTAATA

>hsamiR548f

AAAAACTGTAATTACTTTT

>MADE1

TAATGTCAAAAACTGTGATTACTTTTGCACCAACCTAATA

>SUMF1

TAATGGCAAAAACTGCAATTACTTTTGCACCAACCTAATA

>hsamiR548h\_3p

CAAAAACCGCAATTACTTTTGC

>MADE1

TAATGACAAAAACCGCGATTACTTTTGCACCAACCTAATA

>SUMF1

TAATGGCAAAAACTGCAATTACTTTTGCACCAACCTAATA

>hsamiR548p

TAGCAAAAACTGCAGTTACTTT

>MADE1

TAATGACAAAACTGCAATTAATTTTATACCAACCTAATA

>SUMF1

TAATGGCAAAAACTGCAATTACTTTTGCACCAACCTAATA

>hsamiR548aa

AAAAACCACAATTACTTTTGCACCA

>MADE1

TAATGGCAAAAAACCACAGTTTCTTTTGCACCAACCTAATA

>SUMF1

TAATGGCAAAAACTGCAATTACTTTTGCACCAACCTAATA

>hsamiR548a\_3p  
CAAAACTGGCAATTACTTTTGC  
>MADE1  
TTTAATGGCAAAAATCACAATTACTTTTGCACCAACTTAATA  
>SUMF1  
TTTAATGGCAAAAACCTGCAATTACTTTTGCACCAACCTAATA

>hsamiR548f  
AAAAACTGTAATTACTTTT  
>MADE1  
TTTAATGGCAAAAACCACTATTACTTTTGCACCAACCTAATA  
>SUMF1  
TTTAATGGCAAAAACCTGCAATTACTTTTGCACCAACCTAATA

>hsamiR548a\_3p  
CAAAACTGGCAATTACTTTTGC  
>MADE1  
CGCAATTACTTTTGCACCGACCTAATA  
>AL591684.1  
CGCAATTACTTTTGCACCAACCTAATA

>hsamiR548a\_3p  
CAAAACTGGCAATTACTTTTGC  
>MADE1  
CGCAATTACTTTTGCACCGACCTAATA  
>AL603965.1  
CGCAATTACTTTTGCACCAACCTAATA

>hsamiR548h\_3p  
CAAAAACCGCAATTACTTTTGCA  
>MADE1  
CAAAAACCGGATTACTTTTGCACCAACCTAATA  
>AL591684.1  
CAAAAACCGCAATTACTTTTGCACCAACCTAATA

>hsamiR548h\_3p  
CAAAAACCGCAATTACTTTTGCA  
>MADE1  
CAAAAACCGGATTACTTTTGCACCAACCTAATA  
>AL603965.1  
CAAAAACCGCAATTACTTTTGCACCAACCTAATA

>hsamiR548x\_3p  
TAAAACTGCAATTACTTTC  
>MADE1  
GCAAAAACCTGCAATTACTTTTGCACCAACCTAATA  
>AL591684.1  
GCAAAAACCGCAATTACTTTTGCACCAACCTAATA

>hsamiR548x\_3p

TAAAACTGCAATTACTTTC

>MADE1

GCAAAAACCTGCAATTACTTTTGCACCTAACCTAATA

>AL603965.1

GCAAAAACCGCAATTACTTTTGCACCAACCTAATA

>hsamiR548aa

AAAAACCACAATTACTTTTGCACCA

>MADE1

GGCAAAAACCACAGTTTCTTTTGCACCAACCTAATA

>AL591684.1

GGCAAAAACCGCAATTACTTTTGCACCAACCTAATA

>hsamiR548aa

AAAAACCACAATTACTTTTGCACCA

>MADE1

GGCAAAAACCACAGTTTCTTTTGCACCAACCTAATA

>AL603965.1

GGCAAAAACCGCAATTACTTTTGCACCAACCTAATA

>hsamiR548a\_3p

CAAACTGGCAATTACTTTTGC

>MADE1

AAAAACCCAATTACTTTTGCACAAACCTAATA

>ANKRD5

AAAAACCACAATTACTTTTGCACCAACCTAATA

>hsamiR548d\_3p

CAAAAACCACAGTTTCTTTTGC

>MADE1

GGCAAAAACCACAATTACTTTTGCACCAACCTAATA

>ANKRD5

GGCAAAAACCACAATTACTTTTGCACCAACCTAATA

>hsamiR548a\_3p

CAAACTGGCAATTACTTTTGC

>MADE1

ATGGCAAAAATCACAATTACTTTTGCACCAACTTAATA

>ANKRD5

ATGGCAAAAACCACAATTACTTTTGCACCAACCTAATA

>hsamiR548aa

AAAAACCACAATTACTTTTGCACCA

>MADE1

AGGTTGGTGCAAAGTAATTGTGGTTTTGCCATTGAAAGTAATGGCAAAAACCACAGTTTCTTTTGCACCAACCT  
AATA

>ANKRD5

AGGTTGGAGCAAAAGTAATTGCGGTTTTGCTGCAATTAAGGTTATGGCAAAAACCACAATTACTTTTGCACCAA  
CCTAATA

>hsamiR548h\_3p

CAAAAACCGCAATTACTTTTGCA

>MADE1

CAAAAACCGCGATTACTTTTGCACCAACCTAATA

>PGM3

CAAAAACCGCAATTACGTTTGCACCAACCTAATA

>hsamiR548aa

AAAAACCACAATTACTTTTGCACCA

>MADE1

GCAAAAACCACAGTTTCTTTTGCACCAACCTAATA

>PGM3

GCAAAAACCGCAATTACGTTTGCACCAACCTAATA

>hsamiR548aa

AAAAACCACAATTACTTTTGCACCA

>MADE1

GTTGGTGCAAAAGTAATTGTGGTTTTGCCATTGAAAGTAATGGCAAAAACCACAGTTTCTTTTGCACCAACCTAAT  
A

>CDC27

GTTGGTGCAAAAGTAATTGCAGGTTTTGCCATAAAAGTCATGGCAAAAACCACAATTACTTATGCACCAACCTAAT  
A

>hsamiR548g\_5p

TGCAAAAGTAATTGCAGTTTTTG

>MADE1

GTATTATGTTGGTACAAAAGTAATTACAGTTTTGCCATAGAACGTAATGCAAAAACCTGCAATTACTTTTGCACCTAAT  
CTAATA

>CDC27

GTATTAAGTTGGTGCAAAAGTAATTGCAGGTTTTGCCATAAAAGTCATGGCAAAAACCACAATTACTTATGCACCA  
ACCTAATA

>hsamiR3135a

TGCCTAGGCTGAGACTGCAGTG

>Alu2\_TS

TGTAGTCACAGCTACTTGGGAGGCTGAGGTGGGAGAATCACCTGAGCCCAGGAGGTCAAGGCTGCAGTGA

>SLC35E3

TGTAGTCCCAGCTACTGGGAGGTTGAGGCAGGAGGATTGCTTGAGCCCAGGAGGCTGAGGCTGCAGTGA

>hsamiR3919

GCAGAGAACAAAGGACTCAGT

>ABDC01224945.1\_1546x1450\_RF00019\_Y\_RNA

AGTAGAGAACAAAGGA

>PSAT1

AGTAGAGAACAAAGGA

>hsamiR1285\_3p

TCTGGGCAACAAAGTGAGACCT

>AluJ

GTGGTGGCTCACACCTGCAATCCCAGCACTTG

>KIAA1530

TGGGCAACACAGTGAGACCTCATCTCTACAAAAATTTAAAAAATTAGCCAGGTGTTGTGGTGTGTGCCTGTAGTC  
CCAGCTACCTGGGAGGCTGACGTGGAAGGATGGCTTGAGCCCAGGAGTTTGAGGCTGCACTGAGCTATGATTCTG  
CCACTGCACTCAGCCTGGTAAGAGCAAAGCCCATCTCTAAAAGGAAAAACAAAAAAACAACCTGTTACAACCTC  
AAGATAAATCATTCAATTAATAAATAGGCAAGAGGTTTGAATAGACTCCTCTCAAAGGAGATACACAAATGGCCA  
GTAAGCCCACGAGAAGATGTTCCGGTATCCTTCTCCAATGCTGCTGTGAACATGGGTGCACAAGCTCCGCATGGAC  
AGGTTTTACCTCCTTTGTTTTATACATTGGAGGGAACTGCATGGATAAACCTTAAAAACAACGCCAAGTGTAAG  
AAGCCAGGGACAAGAGGACACATGTATGAAAAGGCACATCCAGAAACAGAAAGCAGATGACTGAACGGTTCCT  
AGCCTTTGTGTTTGTGTTAAAAACAGCATTTGCACAAAAGTGGGTTTCCCAGAGTTCCTCTGAGTGGTGCCTCCTG  
GCTGGGGAATGCACGCTCTGAAGGCTGAGCTGCACACACATCCGTCCGTGCTGAACCCACACCACGACAAGCA  
CTGGTCTCACGAGGACTCGCAGAAGCCCTCTGGAACAGGGTGCCTGCCTGTGTTACATCTCCAGGCCCGAGGGC  
CTCTTCTGCGAGGCCAGACCCATCACCAGACGATGCCGAACCCTGTAGCAGCAGAGCGGCCGTACCTTCAGGGCA  
TTGCAACACACCATTTCTTACATCAAACACAGTAATAGACAAAGCATGGTTACTGCCAGACCCACGCCACTCTG  
CTGTCCTGAGACTGGCAGAGGGAGAAAGTGCTGATGGCCAGTGCCTGGGCCCCGCTCTAGTTTCAGTGCCT  
AGTTAAACTGGTTTAAAACTTCTCGTGCTTCTTCTGGTCCATCCGGTTCATGGCTGCCACTACCCTCCGCACAGCT  
GCCCTGTGGGGAACAAGGCAAGATGTGACCTGGGAGGCTTCCGCCAGGGGCTGGGCTCCCAGTGGCGGCATC  
ACCAAAGTTAGGCACTGGTCTGGGGCAACTGCTGCCCTCGGACACTGACAGACTGCCTGTGGGTGCCACCTTCA  
GAGACAGATGGGCGACGGGCCCTTGGCCCTGGCCCCGAGACAGACAGGCTTAGAAAGGGCCGCCCCAGGTCCCA  
GAAGCGGAGTCTGCGGCGGGTGGTTCTGCGCGGTGAAGGTGGCCCCAGCCCCACCTTGGCACTTCTCCCGTGGCC  
TCCCGCACTCCAGGATGAGGGCAGCCTCCCCCTGGCCTCCCGGGGAGCGGCCTCGCAGGAGATGCAGCCAGGA  
GGCGTCAGGACAGCCCTGCCCGCTGCTGCACGCACGGCTCCACGGCCAGGGCTGGAAACCTGGAGGGCTGCAGC  
AGGGGGGGCACGGGCCAGGCAGGCATTCCGGGGAGCAGGATGAGGTGTGCTGTGCTGACCAGCTCAGCTGCTG  
CGACCCACGAGGGTGTGGAGCTGTGGAGCCAGCAGGGCCTGAGGCCACAATGTGGTGAAGCTGCCGCTCAGCTG  
CGGCCCTGTGGGGCTGCCAGGCGCTGCTGTGGGGGCCCTCGAGGCAGGGTTTTGCCTGTGGTACCCCAAGATC  
CTTTCTGTAGGGAGGGTCTGGGCCACACAGCTGTGGCGAAGAGCCAGCTCCTGCCATGGGCTTCAGTGTCCCA  
TGAGACACAGGGAGGAGGCCTGGCATGGGCCACTGGCCATTCTCCTCCTGGGCATCAGCACCAAGGCTGGCCT  
CTGCCCTGGCTGATCCACGGGAAAACAGCCTCACCTGAGCTCCAAGGGCTAAGGTGCCTTGGGTGGCTGGCAT  
ACGGGATGGGTCCAGCCCTGTGCCAGGGGCCCCAGGCAGCCTCTCCACAGCCCCACCAGCGCCCTGCCCCACC  
CAAGCAAGGCTGTGGATGTACCACCCACAAGCCTGGGGGAAGCCTGGTCTGAGTGCTGTGAAGGCGCCTCCACC  
CGAGCCCACTCAGGCCGGTGCACGGTCATGCTGGCCAGGAGGGGCTCCTCTGCCCGGTGCACTTAGCACCTTCC  
AGGTGTGTCCAAGGGAGGGTTTCTGGGATGGCGATGGGTGGGGGCCACCTCACTGGTGTACCAGACAAACCTG  
CACCAGCAGGGACTTGACACAGA

>hsamiR1972

TCAGGCCAGGCACAGTGGCTCA

>AANU01178229.1\_7254x6952\_RF00100\_7SK

GCAATCTCTGCCTCCCGGTTCAAGTGTTTTCTCTGCCTCAACCTCCTGAATTGCTGGGATTACAGGTGCATGCCAC  
CACATCTGGCTAATTTCTGTATTTTTAGTAGAGACAGGGTTTCACTATGTTGGCCAGGCTGGTCTCGAACTCCTGA  
CCTCAGGTGATCCGCTGCCTCAGCCTCCCAAATTGCTGGGATTACAGGCATGAGCCAC

>MEFV

GTGGCTCATGCCTGTAATCCCTGCACTTTGGGAGGCTGAGGTGGGTGCATCACCTGAGGTCAGGAGTTTGAGACC  
GGCCTGGCCAACATGATGAAACCTCATGTCTACTAAAAATGCAAAAATTAGCCGGGCATGGTGGCGGGCGCCTG  
TAATCCCAGCTACTTCGGAGGCTGAGGCAGGAGAATCTCTTGAACCTGGGAGGCGGAGGTTGCGAGCCAAGATT  
GCACCACTGCACTCCAGCCTGGGTGACAAGAGCAAACTTTGTCTCAAAAAAAAAAAAAAAAAAAGAATCATAGGC  
CGGGCACAGTGGCTCA

>hsamiR1972

TCAGGCCAGGCACAGTGGCTCA

>AANU01178229.1\_7254x6952\_RF00100\_7SK

GCAATCTCTGCCTCCCGGTTCAAGTGTCTCTCCTGCCTCAACCTCCTGAATTGCTGGGATTACAGCTGCGTGCCAC  
CACATCTGGCTAATTTCTGTATTTTAGTAGAGACAGGGTTTCACTATGTTGGCCAGGCTGGTCTCGAACTCCTGA  
CCTCAGGTGGTCCGCTGCCTCAGCCTCCCAAATCGCTGGGATTACAGGCATGAGCCAC

>MEFV

GTGGCTCATGCCTGTAATCCCTGCACTTTGGGAGGCTGAGGTGGGTGCATCACCTGAGGTCAGGAGTTTGAGACC  
GGCCTGGCCAACATGATGAAACCTCATGTCTACTAAAAATGCAAAAATTAGCCGGGCATGGTGGCGGGCGCCTG  
TAATCCCAGCTACTTCGGAGGCTGAGGCAGGAGAATCTCTTGAACCTGGGAGGCGGAGGTTGCGAGCCAAGATT  
GCACCACTGCACTCCAGCCTGGGTGACAAGAGCAAACTTTGTCTCAAAAAAAAAAAAAAAAAAAGAATCATAGGC  
CGGGCACAGTGGCTCA

>hsamiR548i

AAAAGTAATTGCGGATTTTGCC

>MADE1

TAGGCTGGTACAAAAATAATTGCTATTTTGGCATTACTTTTAATGGCAAATCCGCAATTACTTTTGCA

>MTMR6

TAGGTTGGTGCAAAGTAATTGCGGTTTTTGTTCATCACTTTCAATGGCAAAGCCCAATTACTTTTGCA

>hsamiR548a\_3p

CAAACTGGCAATTACTTTTGCC

>MADE1

TATTAGTTTGGTGCAAAGTAATTGCCAGTTTTGCCATTACTTTTAACGGCAAAAAACCCCAATTACTTTTGCA

>MTMR6

TATTAGTTTGGTGCAAAGTAATTGCGGTTTTTGTTCATCACTTTCAATGGCAAAGCCCAATTACTTTTGCA

>hsamiR3934

TCAGGTGTGGAACTGAGGCAG

>MIR

CATTTTACAGATGAGGAA

>SMC1A

CATTTTACAGATGAGGAACTGAGGCA

>hsamiR1255b2\_3p

AACCACTTTCTTTGCTCATCCA

>TIGGER1

AAACCACTTTCTTTGCTCATCC

>TIGD1L2

AAACCACTTTGTTTGTTCATCCA

>hsamiR1227

CGTGCCACCCTTTTCCCCAG

>NonLTR\_5\_CR\_Non\_LTR\_Retrotransposon\_Chlamydomonas\_reinhardtii

TGGGGAAAAGGGTGG

>RFX5

CCACCCTTTTCCCCA

>hsamiR1267

CCTGTTGAAGTGTAATCCCCA

>MSTA

CCAAATCTCATGTTGAAATGTAATCCCCA

>SLC35A5

CCAAATCTCATCTTGAATTGTAATCCCCA

>hsamiR548aa

AAAAACCACAATTACTTTTGCACCA

>MADE1

AATGGCAAAAACCACAGTTTCTTTTGCACCA

>TLR10

AATGGCAAAAACCACAATTAGTTTGCACCA

>hsamiR548aa

AAAAACCACAATTACTTTTGCACCA

>MADE1

AAAACCACAGTTTCTTTTGCACCA

>ZNF154

AAAACCACAGTTACTTTTGCACCA

>hsamiR548aa

AAAAACCACAATTACTTTTGCACCA

>MADE1

TGGTGCAAAAAGTAATTGTGGTTTTTGCCTGTAAAAGTAATGGCAAAAACCACAGTTTCTTTTGCACCA

>HLA-DMB

TGGTGCAAAAAGTAATTGCGGTTTTTGCCACTGAAAGTAATGGCAAAAAGTCAATTACTTTTGCACCA

>hsamiR548j

AAAAGTAATTGCGGTCTTTGGT

>MADE1

CTGGTGCAAAAAGTAATGCAGTTTTTGCCACTGAAAGTAATACCAAAGACCGCAATTACTTTTGCACCA

>HLA-DMB

CTGGTGCAAAAAGTAATTGCGGTTTTTGCCACTGAAAGTAATGGCAAAAAGTCAATTACTTTTGCACCA

>hsamiR548aa

AAAAACCACAATTACTTTTGCACCA

>MADE1

TAATGGCAAAAACCACAGTTTCTTTTGCACCA

>LRRC55

TAATGGCAAAAACCGCAATTACTTTTGCACCA

>hsamiR548v  
AGCTACAGTTACTTTTGCACCA  
>MADE1  
ATGGCAAAAACCGCAATTACTTTTGC  
>KATNAL1  
ATGGAAAAACCACAATTACTTTTGCACCA

>hsamiR548j  
AAAAGTAATTGCGGTCTTTGGT  
>MADE1  
TAGGCTGGTGCAAAAGTAATGCAGTTTTTGCCTGAAAGTAATACCAAAGACCGCAATTACTTTTGCACCA  
>KATNAL1  
TAGGCTGGTGCAAAAGTAATTGCGGTTTTTGCATTGAAAGTAATGGAAAAACCACAATTACTTTTGCACCA

>hsamiR548t\_3p  
AAAAACCACAATTACTTTTGCACCA  
>MADE1  
GTTAGGTTGGTGCAAAAGTAATTGTGGTTTTTGTCAATTAATAAATTGCAAAAACCACGATCACTTTTGCACCA  
>KATNAL1  
GTTAGGCTGGTGCAAAAGTAATTGCGGTTTTTGCATTGAAAGTAATGGAAAAACCACAATTACTTTTGCACCA

>hsamiR548u  
CAAAGACTGCAATTACTTTTGC  
>MADE1  
TTAGGTTGGCGCAAAAGTAATTGCAGTCTTTGCCATTAAGTAAGAAAAAACACATTACTTTTGCACCA  
>KATNAL1  
TTAGGCTGGTGCAAAAGTAATTGCGGTTTTTGCATTGAAAGTAATGGAAAAACCACAATTACTTTTGCACCA

>hsamiR548aa  
AAAAACCACAATTACTTTTGCACCA  
>MADE1  
TTAGGTTGGTGCAAAAGTAATTGTGGTTTTTGCCTGTAAGTAATGGCAAAAACCACAGTTTCTTTTGCACCA  
>KATNAL1  
TTAGGCTGGTGCAAAAGTAATTGCGGTTTTTGCATTGAAAGTAATGGAAAAACCACAATTACTTTTGCACCA

>hsamiR548aa  
AAAAACCACAATTACTTTTGCACCA  
>MADE1  
AGGTTGGTGCAAAAGTAATTGTGGTTTTTGCCTGTAAGTAATGGCAAAAACCACAGTTTCTTTTGCACCA  
>ANKRD5  
AGGTTGGAGCAAAAGTAATTGCGGTTTTTGTGCAATTAAGGTTATGGCAAAAACCACAATTACTTTTGCACCA

>hsamiR548aa  
AAAAACCACAATTACTTTTGCACCA  
>MADE1  
AAGTAATGGCAAAAACCACAGTTTCTTTTGCACCA  
>TCEANC2  
AAGTAATGGCAAAAACCACAATTACTTTTGCACCA



>hsamiR548aa  
AAAAACCACAATTACTTTTGCACCA  
>MADE1  
AAAAGTAATGGCAAAAACCACAGTTTCTTTTGCACCA  
>ITSN1  
AAAAGCAATGGCAAAAACCGCAATCACTTTTGCACCA

>hsamiR548aa  
AAAAACCACAATTACTTTTGCACCA  
>MADE1  
TATTAGTTGGTGCAAAAGTAATTGTGGTTTTTGCCTGTAAAAGTAATGGCAAAAACCACAGTTTCTTTTGCACCA  
>CDC27  
TATTAAGTTGGTGCAAAAGTAATTGCAGTTTTTGCATATAAAAGTCATGGCAAAAACCACAATTACTTATGCACCA

>hsamiR3134  
TGATGGATAAAAAGACTACATATT  
>L1PB1  
GTGAGGGATAAAAAGACTACA  
>NTRK3  
GTGAGGGATAAAAAGACTACA

>hsamiR548a\_3p  
CAAACTGGCAATTACTTTTGC  
>MADE1  
CAATTACTTTTGCACCAACTTAA  
>CD38  
CAAACTTGAATTACTTTTGCACCAACTTAA

>hsamiR548d\_3p  
CAAAAACCACAGTTTCTTTTGC  
>MADE1  
TTATTAGTTGGTGCAAAAGAACTGTGGTTTTTGCATTACTTTCAATGGCAAAAACCACAATTACTTTTGCACCA  
ACCTAA  
>ALG10B  
TTATTAGTTGGTACAAAAGTAATTGTGGTTTTTGCATTACTTTCAATGGCAAAAACCACAATTACTTTTGCCTAA  
CCTAA

>hsamiR548d\_5p  
AAAAGTAATTGTGGTTTTTGCC  
>MADE1  
TTATTAGTTGGTGCAAAAGAACTGTGGTTTTTGCATTACTTTCAATGGCAAAAACCACAATTACTTTTGCACCA  
ACCTAA  
>ALG10B  
TTATTAGTTGGTACAAAAGTAATTGTGGTTTTTGCATTACTTTCAATGGCAAAAACCACAATTACTTTTGCCTAA  
CCTAA

>hsamiR548d\_3p  
CAAAAACCACAGTTTCTTTTGC

>MADE1  
TTATTAGGTTGGTGCAAAAGAACTGTGGTTTTTGCATTACTTTCAATGGCAAAAACCACAATTACTTTTGCACCA  
ACCTAA

>ALG10  
TTATTAGGTTGGTAAAAAAGTAATTGTGGTTTTTGCATTACTTTCAATGGCAAAAACCACAATTACTTTTGCCTAA  
CCTAA

>hsamiR548d\_5p  
AAAAGTAATTGTGGTTTTTGCC  
>MADE1  
TTATTAGGTTGGTGCAAAAGAACTGTGGTTTTTGCATTACTTTCAATGGCAAAAACCACAATTACTTTTGCACCA  
ACCTAA

>ALG10  
TTATTAGGTTGGTAAAAAAGTAATTGTGGTTTTTGCATTACTTTCAATGGCAAAAACCACAATTACTTTTGCCTAA  
CCTAA

>hsamiR548d\_5p  
AAAAGTAATTGTGGTTTTTGCC  
>MADE1  
TATTAGGTTGGTGCAAAAGAACTGTGGTTTTTGCATTACTTTCAATGGCAAAAACCACAATTACTTTTGCACCAA  
CCTAA

>DENND4C  
TATTATGTTGGTACAAAATAATTGCGGTTTTTGCATTAATAGTGGCAAAAACACAATTAATTTTGTGCCAACCT  
AA

>hsamiR548aa  
AAAAACCACAATTACTTTTGCACCA  
>MADE1  
TTAGGTTGGTGCAAAAGTAATTGTGGTTTTTGCATTGAAAGTAATGGCAAAAACCACAGTTTCTTTTGCACCAACC  
TAA  
>RABL5  
TTAGGTTGGTGCAAAAGTAATAGTGGCTTTTGCATTAATAAATAAATGGCAAAAACCACGATTAGTTTGCAC  
CAACCTAA

>hsamiR548t\_3p  
AAAAACCACAATTACTTTTGCACCA  
>MADE1  
GCAAAAACCACGATCACTTTTGCACCACCCTAA  
>TLR10  
GCAAAAACCACAATTAGTTTGCACCAACCTAA

>hsamiR548d\_3p  
CAAAAACCACAGTTTCTTTTGC  
>MADE1  
AAAACCACAATTACTTTTGCACCAACCTAA  
>ZNF154  
AAAACCACAGTTACTTTTGCACCAACCTAA

>hsamiR548t\_3p  
AAAAACCACAATTACTTTTGCACCA  
>MADE1  
GCAAAAACCACGATCACTTTTGCACCACCCTAA  
>FAM23B.1  
GCAAAAACCTCAATTACTTTTGCACCAACCTAA

>hsamiR548t\_3p  
AAAAACCACAATTACTTTTGCACCA  
>MADE1  
GCAAAAACCACGATCACTTTTGCACCACCCTAA  
>TMEM236  
GCAAAAACCTCAATTACTTTTGCACCAACCTAA

>hsamiR548f  
AAAAACTGTAATTACTTTT  
>MADE1  
GCAAAAATTGCAATTAGGTTTGCACCAACCTAA  
>HLA-DMB  
GCAAAAACTGCAATTACTTTTGCACCAACCTAA

>hsamiR548f  
AAAAACTGTAATTACTTTT  
>MADE1  
TAATGGCAAAAACCACTATTACTTTTGCACCAACCTAA  
>HLA-DMB  
TAATGGCAAAAACTGCAATTACTTTTGCACCAACCTAA

>hsamiR548h\_3p  
CAAAAACCGCAATTACTTTTGCA  
>MADE1  
AAAGTAATGACAAAACCGCGATTACTTTTGCACCAACCTAA  
>HLA-DMB  
AAAGTAATGGCAAAAACTGCAATTACTTTTGCACCAACCTAA

>hsamiR548x\_3p  
TAAAAACTGCAATTACTTTC  
>MADE1  
AAAGTAATTGCAGTTTTTACGATTGAAAGTAACGCAAAAACTGCAATTACTTTTGCACCTAACCTAA  
>HLA-DMB  
AAAGTAATTGCGGTTTTTGCCTACTGAAAGTAATGGCAAAAACTGCAATTACTTTTGCACCAACCTAA

>hsamiR548k  
AAAAGTACTTGCGGATTTTGCT  
>MADE1  
GCAAAAATAATTGCGGTTTTTGCCTATTAAGTAAAGCAAAATCCGCAAGTACTTTTGCACCAACCTAA  
>HLA-DMB  
GCAAAAGTAATTGCGGTTTTTGCCTACTGAAAGTAATGGCAAAAACTGCAATTACTTTTGCACCAACCTAA

>hsamiR548u  
CAAAGACTGCAATTACTTTTGCG  
>MADE1  
GCAAAAGTAATTGCAGTCTTTGCCATTAAGTAAAGAAAAAACACATTACTTTTGACCCATCCTAA  
>HLA-DMB  
GCAAAAGTAATTGCGGTTTTGCCACTGAAAGTAATGGCAAAAAGTCAATTACTTTTGACCAACCTAA

>hsamiR548h\_5p  
AAAAGTAATCGCGGTTTTGTC  
>MADE1  
GTGCAAAAGTAATTCCAGTTTTTACCATTAAGTAATGACAAAACCGCGATTACTTTTGACCCACCTAA  
>HLA-DMB  
GTGCAAAAGTAATTGCGGTTTTGCCACTGAAAGTAATGGCAAAAAGTCAATTACTTTTGACCAACCTAA

>hsamiR548a\_5p  
AAAAGTAATTGCGAGTTTTACC  
>MADE1  
TGGTGCAAAAGTAATTGCCAGTTTTGCCATTGAAAGTAATGGTAAAACCGCAATTACTTTTGACCCGACCTAA  
>HLA-DMB  
TGGTGCAAAAGTAATTGCGGTTTTGCCACTGAAAGTAATGGCAAAAAGTCAATTACTTTTGACCAACCTAA

>hsamiR548c\_5p  
AAAAGTAATTGCGGTTTTGCC  
>MADE1  
TGGTGCAAAAGTAATTGAGATTTTTGCTACTGAAAGTAATGGCAAAAACCGCAATTACTTTTGACCAACCTAA  
>HLA-DMB  
TGGTGCAAAAGTAATTGCGGTTTTGCCACTGAAAGTAATGGCAAAAAGTCAATTACTTTTGACCAACCTAA

>hsamiR548h\_5p  
AAAAGTAATCGCGGTTTTGTC  
>MADE1  
TGGTGCAAAAGTAATTGCAGTTTTTGTACTTTTCAATGACAAAACCGCGATTACTTTTGACCAACCTAA  
>HLA-DMB  
TGGTGCAAAAGTAATTGCGGTTTTGCCACTGAAAGTAATGGCAAAAAGTCAATTACTTTTGACCAACCTAA

>hsamiR548i  
AAAAGTAATTGCGGATTTTGCC  
>MADE1  
TGGTGCAATAATTTGTGGTTTTTGCCGTTAAAGTATGGCAAAATCCGCAATTACTTTTGACCAACCTAA  
>HLA-DMB  
TGGTGCAAAAGTAATTGCGGTTTTGCCACTGAAAGTAATGGCAAAAAGTCAATTACTTTTGACCAACCTAA

>hsamiR548a\_3p  
CAAACTGGCAATTACTTTTGCG  
>MADE1  
TGGTGCAAAAGTAATTGCCAGTTTTGCCATTGAAAGTAATGGTAAAACCGCAATTACTTTTGACCCGACCTAA  
>HLA-DMB  
TGGTGCAAAAGTAATTGCGGTTTTGCCACTGAAAGTAATGGCAAAAAGTCAATTACTTTTGACCAACCTAA

>hsamiR548c\_3p  
CAAAAATCTCAATTACTTTTGC  
>MADE1  
TGGTGCAAAAAGTAATTGAGATTTTTGCTACTGAAAGTAATGGCAAAAACCGCAATTACTTTTGCACCAACCTAA  
>HLA-DMB  
TGGTGCAAAAAGTAATTGCGGTTTTTGCCACTGAAAGTAATGGCAAAAACCGCAATTACTTTTGCACCAACCTAA

>hsamiR548f  
AAAAACTGTAATTACTTTT  
>MADE1  
TGGTCCAAAAGTAATTACAGTTTTTGTCTTTGAAAGTAATGTCAAAAACCGCAATTACTTTTGCACCAACCTAA  
>HLA-DMB  
TGGTGCAAAAAGTAATTGCGGTTTTTGCCACTGAAAGTAATGGCAAAAACCGCAATTACTTTTGCACCAACCTAA

>hsamiR548f  
AAAAACTGTAATTACTTTT  
>MADE1  
TGGTGCAAAAAGTAATTACAGTTTTTGCATTAAAAGTAATGATAAAAACCGCAATTATGTTTCGCACCAACCTAA  
>HLA-DMB  
TGGTGCAAAAAGTAATTGCGGTTTTTGCCACTGAAAGTAATGGCAAAAACCGCAATTACTTTTGCACCAACCTAA

>hsamiR548p  
TAGCAAAAACCGCAATTACTTTT  
>MADE1  
TGGTGCAAAAAGTAACCGCAATTACTTTTGTCTATTGAAAGTAATGACAAAACCGCAATTAATTTTATACCAACCTAA  
>HLA-DMB  
TGGTGCAAAAAGTAATTGCGGTTTTTGCCACTGAAAGTAATGGCAAAAACCGCAATTACTTTTGCACCAACCTAA

>hsamiR548t\_3p  
AAAAACCACAATTACTTTTGCACCA  
>MADE1  
TGGTGCAAAAAGTAATTGTGGTTTTTGTCTTTAAAAGTAATGGCAAAAACCGCAATTACTTTTGCACCAACCTAA  
>HLA-DMB  
TGGTGCAAAAAGTAATTGCGGTTTTTGCCACTGAAAGTAATGGCAAAAACCGCAATTACTTTTGCACCAACCTAA

>hsamiR548aa  
AAAAACCACAATTACTTTTGCACCA  
>MADE1  
TGGTGCAAAAAGTAATTGTGGTTTTTGCATTGAAAGTAATGGCAAAAACCGCAATTACTTTTGCACCAACCTAA  
>HLA-DMB  
TGGTGCAAAAAGTAATTGCGGTTTTTGCCACTGAAAGTAATGGCAAAAACCGCAATTACTTTTGCACCAACCTAA

>hsamiR548t\_3p  
AAAAACCACAATTACTTTTGCACCA  
>MADE1  
GCAAAAACCGCAATTACTTTTGCACCAACCTAA  
>AL591684.1  
GCAAAAACCGCAATTACTTTTGCACCAACCTAA

>hsamiR548t\_3p  
AAAAACCACAATTACTTTTGCACCA  
>MADE1  
GCAAAAACCACGATCACTTTTGCACCACCCTAA  
>AL603965.1  
GCAAAAACCGCAATTACTTTTGCACCAACCTAA

>hsamiR548t\_3p  
AAAAACCACAATTACTTTTGCACCA  
>MADE1  
GCAAAAACCACGATCACTTTTGCACCACCCTAA  
>ANKRD5  
GCAAAAACCACAATTACTTTTGCACCAACCTAA

>hsamiR548t\_3p  
AAAAACCACAATTACTTTTGCACCA  
>MADE1  
GCAAAAACCACGATCACTTTTGCACCACCCTAA  
>TCEANC2  
GCAAAAACCACAATTACTTTTGCACCAACCTAA

>hsamiR548d\_3p  
CAAAAACCACAGTTTCTTTTGC  
>MADE1  
ATGGCAAAAACCACAATTACTTTTGCACCAACCTAA  
>ANKRD5  
ATGGCAAAAACCACAATTACTTTTGCACCAACCTAA

>hsamiR548d\_3p  
CAAAAACCACAGTTTCTTTTGC  
>MADE1  
AATGGCAAAAACCACAATTACTTTTGCACCAACCTAA  
>TCEANC2  
AATGGCAAAAACCACAATTACTTTTGCACCAACCTAA

>hsamiR548t\_3p  
AAAAACCACAATTACTTTTGCACCA  
>MADE1  
GCAAAAACCACGATCACTTTTGCACCACCCTAA  
>ITSN1  
GCAAAAACCGCAATCACTTTTGCACCAACCTAA

>hsamiR548a\_3p  
CAAAACTGGCAATTACTTTTGC  
>MADE1  
CAATTACTTTTGCACCGACCTAATAA  
>FAM23B.1  
CAATTACTTTTGCACCAACCTAATAA

>hsamiR548a\_3p  
CAAAACTGGCAATTACTTTTGC  
>MADE1  
CAATTACTTTTGCACCGACCTAATAA  
>TMEM236  
CAATTACTTTTGCACCAACCTAATAA

>hsamiR548aa  
AAAAACCACAATTACTTTTGCACCA  
>MADE1  
AATGGCAAAAACCACAGTTTCTTTTGCACCAGACTAATAA  
>FAM23B.1  
AATGGCAAAAACCTCAATTACTTTTGCACCAACCTAATAA

>hsamiR548aa  
AAAAACCACAATTACTTTTGCACCA  
>MADE1  
AATGGCAAAAACCACAGTTTCTTTTGCACCAACCTAATAA  
>FAM23B.1  
AATGGCAAAAACCTCAATTACTTTTGCACCAACCTAATAA

>hsamiR548aa  
AAAAACCACAATTACTTTTGCACCA  
>MADE1  
AATGGCAAAAACCACAGTTTCTTTTGCACCAGACTAATAA  
>TMEM236  
AATGGCAAAAACCTCAATTACTTTTGCACCAACCTAATAA

>hsamiR548aa  
AAAAACCACAATTACTTTTGCACCA  
>MADE1  
AATGGCAAAAACCACAGTTTCTTTTGCACCAACCTAATAA  
>TMEM236  
AATGGCAAAAACCTCAATTACTTTTGCACCAACCTAATAA

>hsamiR603  
CACACACTGCAATTACTTTTGC  
>MADE1  
CAATTACTTTTGCACCAA  
>TCEANC2  
CAATTACTTTTGCACCAA

>hsamiR603  
CACACACTGCAATTACTTTTGC  
>MADE1  
CAATTACTTTTGCACCAA  
>FAM23B.1  
CAATTACTTTTGCACCAA

>hsamiR603  
CACACACTGCAATTACTTTTGC  
>MADE1  
CAATTACTTTTGCACCAA  
>TMEM236  
CAATTACTTTTGCACCAA

>hsamiR603  
CACACACTGCAATTACTTTTGC  
>MADE1  
CAATTACTTTTGCACCAA  
>KATNAL1  
CAATTACTTTTGCACCAA

>hsamiR603  
CACACACTGCAATTACTTTTGC  
>MADE1  
CAATTACTTTTGCACCAA  
>ANKRD5  
CAATTACTTTTGCACCAA

>hsamiR603  
CACACACTGCAATTACTTTTGC  
>MADE1  
GCAATTACTTTTGCACCAA  
>LRRC55  
GCAATTACTTTTGCACCAA

>hsamiR603  
CACACACTGCAATTACTTTTGC  
>MADE1  
GCAATTACTTTTGCACCAA  
>AL591684.1  
GCAATTACTTTTGCACCAA

>hsamiR603  
CACACACTGCAATTACTTTTGC  
>MADE1  
GCAATTACTTTTGCACCAA  
>AL603965.1  
GCAATTACTTTTGCACCAA

>hsamiR603  
CACACACTGCAATTACTTTTGC  
>MADE1  
TGCAATTACTTTTGCACCAA  
>CD38  
TGCAATTACTTTTGCACCAA



>hsamiR603  
CACACACTGCAATTACTTTTGC  
>MADE1  
ACTGCAATTACTTTTGCACCAA  
>HLA-DMB  
ACTGCAATTACTTTTGCACCAA

>hsamiR603  
CACACACTGCAATTACTTTTGC  
>MADE1  
ACTGCAATTACTTTTGCACCAA  
>SUMF1  
ACTGCAATTACTTTTGCACCAA

>hsamiR548i  
AAAAGTAATTGCGGATTTTGCC  
>MADE1  
TAGGCTGGTACAAAAATAATTGCTATTTTTGCCATTACTTTTAATGGCAAATCCGCAATTACTTTTGCACCAA  
>KATNAL1  
TAGGCTGGTGCAAAGTAATTGCGGTTTTTGGCATTGAAAGTAATGGAAAAACCACAATTACTTTTGCACCAA

>hsamiR1268a  
CGGGCGTGGTGGTGGGGG  
>AluYc2\_Repetitive\_sequence\_Homo\_sapiens  
TTTAGTAGAGTCGGTGTCTCCATGTTGGCCAGGCTGGTTTCGAACTCCTGACCTCAGGTGATCCACCCACCTCAG  
CCTCCCAAAGTGCTGGAATTACAGGCGTGAGCCACCG  
>RBM7  
GGCGTGGTGGTGGTGCCTGTAATCCCAGCTACTCGGGAGGCTAAGGCAGGAGAATCACTTGAACCCGGGATAT  
GGAGGTTGCAGTGACCTGAGATCCC GCCATTGCACTCTAGCCTGGGTGTCGTAGCAAGACTCTGTCTCAAAAAA  
AAACAAAAACAAACATGCAGTATTAATCTTCGTTAACATCTACAAACCTACTAAGTTTTCATATGGATAAGATACCC  
AAAAATAATAATCTCATTGGAAACAAATTCTGTGAAAATGCTTAAGCAAACAAATTGTTTATCTTAATTCTATAGTG  
AGTAGTTGAATAGCTACATTTACTTAGAAACAGAAAACTGAATTCATTTATAAACAGGAAATCTAAGTGTACTTTA  
ACTCCTAGAGACCACTGAGGGTAACTAAAGTACTCCAAGCTATAATCGAGGGGTCACTGAAAATCTGATTGTGAA  
ACATCATGCTCTATATGTACAAAAGATGATTTTCAGGATGCTCAAAATTAAGAAGCTGATATTCTAAACAGCAGGC  
AATCAGTGAATAAAAAGTATGTTAATTCTTTGTGTACAATGTCTCTGAAGTCAGTGACATAAAAAAAAAAAAAATAAC  
ACACACCCCTTCTTTTATATTTTTCAGTATATTA AAAAGGAACAGTACAAATGCTGTGGTATTA AAAAGGATCCTTAT  
TTTTCAACAAATGAACTTTTATAAACAATTCTGTAATGAAATGAAAACAGTATCTTAATACAAGCTTTTGTAAACA  
AGATTTTAAA

>hsamiR1285\_3p  
TCTGGGCAACAAAGTGAGACCT  
>AluJ  
CTGGGCAAAAGAGTGAGACTGTGTCCCAAGGAAAAAAAAAAAA  
>FCAR  
CTGGGCAACAGAGTGAGACTCTGTCTCAAATAAAAAATAAAAA

>hsamiR1285\_3p

TCTGGGCAACAAAGTGAGACCT

>AluJ

AGGAGTTTGAGACCAGCCTGGGCAACAAAGTGAGATCCTATCTCTACAAATAATAAAAAA

>FAM175A

AGGAGTTTGAGACCAGCCTGGGCAACAAAGTGAGAACCTGTCTCTACAAACAATAAAAAA

### 5pUTR Aligning Sequences

---

>hsamir161\_3p

CCAGTATTAAGTGTGCTGCTGA

>AAYZ01253455.1\_1930x1824\_RF00026\_U6

CTGTGCTGCTGAAG

>RBMS2

CTGTGCTGCTGAAG

>hsamir161\_3p

CCAGTATTAAGTGTGCTGCTGA

>AAYZ01253455.1\_1930x1824\_RF00026\_U6

TCTAAAATTATCTCCAGTATTAAGT

>SLC14A2

TCTTAACTTATTCCAGTATTAAGT

>hsamir161\_3p

CCAGTATTAAGTGTGCTGCTGA

>AAYZ01253455.1\_1930x1824\_RF00026\_U6

CTCCAGTATTAAGT

>IL15

CTCCAGTATTAAGT

>hsamir161\_3p

CCAGTATTAAGTGTGCTGCTGA

>AAYZ01253455.1\_1930x1824\_RF00026\_U6

AAAATTATCTCCAGTATTAAGT

>IL15

AAAAGTCACTCCAGTATTAAGT

>hsamiR28\_5p

AAGGAGCTCACAGTCTATTGAG

>L2\_Platt1o

CCTCAAGGAGCTCACAG

>IL15

CCTCAAGGAGCTCACAG

>hsamiR28\_5p

AAGGAGCTCACAGTCTATTGAG

>L2\_Platt1o

CTCAAGGAGCTCACAGTCTA

>PITPNB  
CTCAAGAAGCTCACAGTCTA

>hsamir302a\_3p  
TAAGTGCTTCCATGTTTTGGTGA  
>THER1\_SINE\_Mammalia  
TGCTTCCATGTTTCAGTGGAGGTGTCTCCAA  
>HIVEP2  
TGCTTCCATGTTCCAGGGTGTCTGCAA

>hsamir302a\_5p  
ACTTAAACGTGGATGTA CTGCT  
>THER1\_SINE\_Mammalia  
CCACTTAAACGTGGATGTA  
>MYO9B  
CCTCTTAAACGTGGATTTA

>hsamir301a\_5p  
GCTCTGACTTTATTGCACTACT  
>LINE1-21\_ZM  
TGCTCTGACTTTATT  
>HBP1  
TGCTCTGACTTTATT

>hsamir302b\_3p  
TAAGTGCTTCCATGTTTTAGTAG  
>THER1\_SINE\_Mammalia  
TGCTTCCATGTTTCAGTGGAGGTGTCTCCAA  
>HIVEP2  
TGCTTCCATGTTCCAGGGTGTCTGCAA

>hsamir302c\_3p  
TAAGTGCTTCCATGTTTCAGTGG  
>THER1\_SINE\_Mammalia  
TGCTTCCATGTTTCAGTGGAGGTGTCTCCAA  
>HIVEP2  
TGCTTCCATGTTCCAGGGTGTCTGCAA

>hsamir302c\_5p  
TTTAAACATGGGGGTACCTGCTG  
>THER1\_SINE\_Mammalia  
GGGGGTACCTGCTG  
>IL21R  
CTTCTGCCTGCCCCG

>hsamir302c\_5p  
TTAACATGGGGGTACCTGCTG  
>THER1\_SINE\_Mammalia  
TGGGGGTACCTGCTGTGTGAA  
>BNIPL  
TGGGGGTACCTGCCTGTGAA

>hsamir376c  
AACATAGAGGAAATCCACGT  
>CER15\_I\_CE\_LTR\_Retrotransposon\_Caenorhabditis\_elegans  
AACATAGAGGAAA  
>CYorf15B.1  
AACATAGAGGAAA

>hsamiR376a\_5p  
GTAGATTCTCCTTCTATGAGTA  
>CER15\_I\_CE\_LTR\_Retrotransposon\_Caenorhabditis\_elegans  
CTTCTATGAGTACAT  
>DFNA5  
CTTCTATGAGTACAT

>hsamiR376a\_3p  
ATCATAGAGGAAAATCCACGT  
>CER15\_I\_CE\_LTR\_Retrotransposon\_Caenorhabditis\_elegans  
TAGAGGAAAATCCA  
>TYRP1  
TAGAGGAAAATCCA

>hsamiR376a\_3p  
ATCATAGAGGAAAATCCACGT  
>CER15\_I\_CE\_LTR\_Retrotransposon\_Caenorhabditis\_elegans  
TAATCATAGAGGAA  
>GRHL3  
TAATCATAGAGGAA

>hsamiR340\_3p  
TCCGTCTCAGTTACTTTATAGC  
>MARNA  
GTCTCAGTTACTTT  
>GPR141  
GTCTCAGTTACTTT

>hsamir345\_5p  
GCTGACTCCTAGTCCAGGGCTC  
>MIR3  
ACTCCTAGTCCAGGGCTC  
#N/A  
T

>hsamir376b  
ATCATAGAGGAAAATCCATGTT  
>CER15\_I\_CE\_LTR\_Retrotransposon\_Caenorhabditis\_elegans  
TAGAGGAAAATCCA  
>TYRP1  
TAGAGGAAAATCCA

>hsamir376b  
ATCATAGAGGAAAATCCATGTT  
>CER15\_I\_CE\_LTR\_Retrotransposon\_Caenorhabditis\_elegans  
AAAATCCATGTTTT  
>LPHN3  
AAAATCCATGTTTT

>hsamir376b  
ATCATAGAGGAAAATCCATGTT  
>CER15\_I\_CE\_LTR\_Retrotransposon\_Caenorhabditis\_elegans  
TAATCATAGAGGAA  
>GRHL3  
TAATCATAGAGGAA

>hsamiR493\_5p  
TTGTACATGGTAGGCTTTCATT  
>L2B  
GTACATGGTAGGCTTT  
>PRKCQ  
GTACATGGTAGGCTTT

>hsamiR493\_5p  
TTGTACATGGTAGGCTTTCATT  
>L2B  
GGGCTTTGTACATGGTA  
>PTPN3  
GGGCTTTGTACATGGTA

>hsamiR493\_3p  
TGAAGGTCTACTGTGTGCCAGG  
>L2B  
CTACTGTGTGCCAGGCC  
>AES  
CTACTGTGTGCCAGGCC

>hsamiR450a\_5p  
TTTTGCGATGTGTTCCCTAATAT  
>Ginger1\_6\_HM\_Ginger1\_Hydra\_magnipapillata  
TGTGTTCCCTAATAT  
>ZNF410  
TGTGTTCCCTAATAT

>hsamiR544a

ATTCTGCATTTTTAGCAAGTTC

>MER5A1

GGACCAAGATTCTGCATTTTTAGCAAGTTCTCAAGTGA

>VGLL4

GGACTACGATTCTGCATTTCTAACAAGTTCCCAGGTGA

>hsamiR566

GGGCGCCTGTGATCCCAAC

>GarnAlu1

GTGGCGGGCGCCTGTGATCCCAACTACTCAGGAGGCTGGGGCAGCAGAATCGCTTGAACCCGGGAGGCGAAGGT

TGCAGTGAGCCAAGATCGCGCCATTGCACTCCAGCCTGGGTGACAGAGTGAGACTCCAT

>ZCCHC8

GTGGCGGGCGCCTGTAATCCCAGCTATTCGGGAGGCTGAGGCAGGAGAATCGCTTGAACCCGGGAGGCGGAGG

TTGCAGTGAGCCGAGATCGCGCCACTGCACTCCAGCCTGGGCAACAGACTGAGACTCCAT

>hsamiR566

GGGCGCCTGTGATCCCAAC

>GarnAlu1

GCCTGTAATCCCAGCACTTTGGGAGGCTGAGACAGGTGGATCACGAGGTCAGGAGTTCGAGACCAGCCTGACCA

ACATGGAGAAACCCCATCTCTACTAAAAATACAAAAATTAGCTAGGCGTGGTGGCGGGCGCCTGTGATCCCAACT

ACTCAGGAGGCTGGGGCAGCAGAATCGCTTGAACCCGGGAGGCGAAGGTTGCAGTGAGCCAAGATCGCGCCATT

GCACTCCAGCCTGGGTGACAGAGTGAGACTCC

>TM7SF3

GCCTGTAATCCCAGCACTCTGGGAGGCCAAGGCGGGCAGATCACGAGGTCAGGAGTTCGAGACCAGCCTGAACA

ACATGGTGAAACCCCGCCTGTACTAAAAATACAAAAACTAGCTGGGTGTGGTGGCGGGCGCCTGTAATCCCAGCT

ACTCTGGAGGCTGAGGCAGGAGAATTGCTTGAACCCGGGTGTCGGAGGTTGCAGTCAGCCAAGATCATGCCACT

GCACTCCAGCCTAGGCGACAGAGCGAGACTCC

>hsamiR566

GGGCGCCTGTGATCCCAAC

>GarnAlu1

AGCTGGGTGTGGTGGCTGACGCCTGTAATCCCAGCTAGTCAGGAGGCTGAGACAGGAGAATCGCTTGAACCC

>TM7SF3

AGCTGGGTGTGGTGGCGGGCGCCTGTAATCCCAGCTACTCTGGAGGCTGAGGCAGGAGAATTGCTTGAACCC

>hsamiR566

GGGCGCCTGTGATCCCAAC

>GarnAlu1

GTGGCTCATGCCTGTAATCCCAGCACTTTGGGAGGCTGAGACAGGTGGATCACGAGGTCAGGAGTTCGAGACCA

GCCTGACCAACATGGAGAAACCCCATCTCTACTAAAAATACAAAAATTAGCTAGGCGTGGTGGCGGGCGCCTGTG

ATCCCAACTACTCAGGAGGCTGGGGCAGCAGAATCGCTTGAACCCGGGAGGCGAAGGTTGCAGTGAGCCAAGAT

CGCGCCATTGCACTCCAGCCTGGGTGACAGAGTGAGACTCC

>ACTR6

GTGGCTCACGCCTGTAATCCCAGCACTTTAGGAGACCAAGGCAAGCAGATCACTTGAGGTCAGGAGCTTGAGACC

AGCCTGACCAACACGCGCAAACCCCGTCTCTATTAATAAAAAATACAAAAAGTAGCCGGGCGAGGTGGCGGGCGCCTGT

AATCCCAAGTACTCGGGAGGCTGAGGCGGGAGAATTGCTTGAACCGGGAGGCGGAGGTTGCAGTGAGCCGAG  
ATGGCTCCACTACACTCCAGCCTGGGCGACAGAGCGAGACTCC

>hsamiR566

GGGCGCCTGTGATCCCAAC

>GarnAlu1

GGTGGCTGACGCCTGTAATCCCAGCTAGTCAGGAGGCTGAGACAGGAGAATCGCTTGAACCCAGCAGATGGAGG  
TTGCAGTGAGCCG

>ACTR6

GGTGGCGGGCGCCTGTAATCCCAAGTACTCGGGAGGCTGAGGCGGGAGAATTGCTTGAACCGGGAGGCGGAG  
GTTGCAGTGAGCCG

>hsamiR566

GGGCGCCTGTGATCCCAAC

>GarnAlu1

GTGGCTCATGCCTGTAATCCCAGCACTTTGGGAGGCTGAGACAGGTGGATCACGAGGTCAGGAGTTCGAGACCA  
GCCTGACCAACATGGAGAAACCCCATCTCTACTAAAAATACAAAATTAGCTAGGCGTGGTGGCGGGCGCCTGTG  
ATCCCAACTACTCAGGAGGCTGGGGCAGCAGAATCGCTTGAACCCGGGAGGCGAAGGTTGCAGTGAGCCAAGAT  
CGCGCCATTGCACTCCAGCCTGGGTGACAGAG

>ACTR6

GTGGCTCACGCCTGTAATCCCAGCACTTTAGGAGACCAAGGCAAGCAGATCACTTGAGGTCAGGAGCTTGAGACC  
AGCCTGACCAACACGGCGAAACCCCGTCTCTATTAATAAATACAAAAGTAGCCGGGCGAGGTGGCGGGCGCCTGT  
AATCCCAAGTACTCGGGAGGCTGAGGCGGGAGAATTGCTTGAACCGGGAGGCGGAGGTTGCAGTGAGCCGAG  
ATGGCTCCACTACACTCCAGCCTGGGCGACAGAG

>hsamiR566

GGGCGCCTGTGATCCCAAC

>GarnAlu1

GTGGCTCATGCCTGTAATCCCAGCACTTTGGGAGGCTGAGACAGGTGGATCACGAGGTCAGGAGTTCGAGACCA  
GCCTGACCAACATGGAGAAACCCCATCTCTACTAAAAATACAAAATTAGCTAGGCGTGGTGGCGGGCGCCTGTG  
ATCCCAACTACTCAGGAGGCTGGGGCAGCAGAATCGCTTGAACCCGGGAGGCGAAGGTTGCAGTGAGCCAAGAT  
CGCGCCATTGCACTCCAGCCTGGGTGACAGAGTGAGACTCCATCTCAA

>MCCC1

GTGGCCACGCCCATAATCCCAGCACTTTGGGAGGCTGAGGTGGGTGGATCATCTGAGGTCAGGAGTTGGAGAC  
CAGCCTGGCCAACATGGTGAAGTCCATCTCTACTAAAAATACAAAATTAGCTGGGCATGGTGTGGGCGCCTGT  
AATCCCAGTACTCGGGAGGCTGAGGTGGAAGAATCGCTTGAACCCGGGAGGCGGAAGTTGCAGTGAGCCGAG  
ATCACGCCACTGCACTCCAGCCTGAGTGACAAGAGCAAACTCCATCTCAA

>hsamiR566

GGGCGCCTGTGATCCCAAC

>GarnAlu1

GTGGCTCATGCCTGTAATCCCAGCACTTTGGGAGGCTGAGACAGGTGGATCACGAGGTCAGGAGTTCGAGACCA  
GCCTGACCAACATGGAGAAACCCCATCTCTACTAAAAATACAAAATTAGCTAGGCGTGGTGGCGGGCGCCTGTG  
ATCCCAACTACTCAGGAGGCTGGGGCAGCAGAATCGCTTGAACCCGGGAGGCGAAGGTTGCAGTGAGC

>SYNJ2

GTGGCTCAGCCTGTAATCCCAACACTTTGAGAGGCCAAGGTGGGTGGATCACCTGAGGTCAGGAGTTTGGGACC  
AGCCTGGCCAACATGGTGAAACCCCGTCTCTACTAAAAACACAAAAATTAGCCAGGCATGGTGGTGTGCACCTGT  
AATCCCAGCTACTTGGGAGGCTGAGGCAGGAGAATTGCTTGAATCTGGGAAGCGGAGGTTGCAGTGAGC

>hsamiR566  
GGGCGCCTGTGATCCCAAC  
>GarnAlu1  
GGTGTGGTGGCTGACGCCTGTAATCCCA  
>SYNJ2  
GGTGCGGTGGCTCACGCCTGTAATCCCAAC

>hsamiR566  
GGGCGCCTGTGATCCCAAC  
>GarnAlu1  
CACAGTGGCTCATGCCTGTAATCCCAGCACTTTGGGAGGCTGAGACAGGTGGATCACGAGGTCAGGAGTTCGAG  
ACCAGCCTGACCAACATGGAGAAACCCCATCTCTACTAAAAATACAAAAATTAGCTAGGCGTGGTGGCGGGCGCC  
TGTGATCCCACTACTCAGGAGGCTGGGGCAGCAGAATCGCTTGAACCCGGGAGGCGAAGGTTGCAGTGAGCCA  
AGATCGCGCCATTGCACTCCAGCCTGGGTGACAGAGTGAGACTCCATCTCAAAAAA  
>AACS  
CACAGTGGCTCACACCTGTAATCCCAGCATTTGGGAGGCCAAGGTGGGTGGATCACCTGAGGTCAGGAGCTCGA  
GACCAGCCTGACCAACACGGTGAAATCTCATCTCTACTAAAAATATAGAAAAATTAGCTGGGCGTGGTGGCACAT  
GCCTGTGATCCCAGCCACTTGGGAGGCTGAGGCACAAGAAGTCTTGAACCCAGAAGGTAGAGGTTGCAGTGAG  
CTGAGATCGCACCCACTGCACTCCAGCCTGGGTGACAGAGCAAGACTCTACCTCAAAAAA

>hsamiR566  
GGGCGCCTGTGATCCCAAC  
>GarnAlu1  
AAAAATAAGCTGGGTGTGGTGGCTGACGCCTGTAATCCCAGCTAGTCAGGAGGCTGAGACAGGAGAATCGCTTG  
AACCCAGCAGATGGAGGTTGCAGTGAGC  
>AACS  
AAAAATTAGCTGGGCGTGGTGGCACATGCCTGTGATCCCAGCCACTTGGGAGGCTGAGGCACAAGAAGTCTTGA  
ACCCAGAAGGTAGAGGTTGCAGTGAGC

>hsamiR566  
GGGCGCCTGTGATCCCAAC  
>GarnAlu1  
GTGGCTCATGCCTGTAATCCCAGCACTTTGGGAGGCTGAGACAGGTGGATCACGAGGTCAGGAGTTCGAGACCA  
GCCTGACCAACATGGAGAAACCCCATCTCTACTAAAAATACAAAAATTAGCTAGGCGTGGTGGCGGGCGCCTGTG  
ATCCCACTACTCAGGAGGCTGGGGCAGCAGAATCGCTTGAACCCGGGAGGCGAAGGTTGCAGTGAGCCAAGAT  
CGCGCCATTGCACTCCAGCCTGGGTGACA  
>URGCP  
GTGGCTCAGCCTGCAATTCAGCACTTTGGAAGGCTGAGGCGGGCGGATTACTTGAGGTCAGGAGTTCGAGACT  
GGCCTGGCCAACATGGTGAAACCCGTCTCTACTAAAAATATAAAAAATTAGCCAGGCGTGGTGGCAGGGCGCCTGT  
AATCCCAGCTACTTCGAGGCTAAGGCAGGAGAATCACTTGAACACAGGAGGCAGAGTTCAGTGAGCCGAGAT  
CGCACCACTGCACTCCAGCCTGGGTGACA

>hsamiR566



GGGCGCCTGTGATCCCAAC

>GarnAlu1

GTGGTGGCTGACGCCTGTAATCCCAGCTAGTCAGGAGGCTGAGACAGGAGAATCGCTTGAAC

>URGCP

GTGGTGGCAGGCGCCTGTAATCCCAGCTACTTCGGAGGCTAAGGCAGGAGAATCACTTGAAC

>hsamiR566

GGGCGCCTGTGATCCCAAC

>GarnAlu1

CAGGAGTTCGAGACCAGCCTGACCAACATGGAGAAACCCCATCTCTACTAAAAATACAAAAATTAGCTAGGCGTG

GTGGCGGGCGCCTGTGATCCCACTACTCAGGAGGCTGGGGCAGCAGAATCGCTTGAACCCGGGAGGCGAAGGT

TGCAGTGAGCCAAGATCGCGCCATTGCACTCCAGCCTGGGTGACAGAGTGAGACTCCATCTCAA

>PYROXD1

CAGGAGTTCGAGACCAGCCTGGCCAACATGGTGAAAGCCCGTCTCTACTAAAAATACAAACATTAGCGGGGCGTG

GTGGCTGGCGCCTGTAATCCCAGCTACAGGCTGACGCAACAGAAGAATCGCTTGAACCCGGGAGGCAAAGCTTG

CATTAAGCCAAGATCGCACCACTGCCCTCCAGTCTGGGCGACAGAGTGAGACTCCGTCTCAA

>hsamiR566

GGGCGCCTGTGATCCCAAC

>GarnAlu1

GTGGTGGCTGACGCCTGTAATCCCAGCTA

>PYROXD1

GTGGTGGCTGGCGCCTGTAATCCCAGCTA

>hsamiR566

GGGCGCCTGTGATCCCAAC

>GarnAlu1

CTGTAATCCCAGCACTTTGGGAGGCTGAGACAGGTGGATCACGAGGTCAGGAGTTCGAGACCAGCCTGACCAAC

ATGGAGAAACCCCATCTCTACTAAAAATACAAAAATTAGCTAGGCGTGGTGCGGGCGCCTGTGATCCCACTACT

CAGGAGGCTGGGGCAGCAGAATCGCTTGAACCCGGGAGGCGAAGGTTGCAGTGAGCCAAGATCGCGCCATTGC

ACTCCAGCCTGG

>TBC1D5

CTGTAATCCCAGCACTTTGGGAGGCTGAGGCAGGCGGATTACTTGAGGTCAGCAGTTCGAGACCAGCCTGGCCAA

TATAGTGAAACCCCGTCTCTACTAAAAATACAAAAATTAGCCGGGCATGGCGGTGGGCGCCTGTAATCCCAGCTCC

TGAGGAGGCTGAGGCAGGAGAATCGCTTGAATCTGGGAGGCGGAGATTGCGGTGAGCTGAGATCGCACCAATTAT

ACTCCAGCCTGG

>hsamiR566

GGGCGCCTGTGATCCCAAC

>GarnAlu1

GTGGCTCATGCCTGTAATCCCAGCACTTTGGGAGGCTGAGACAGGTGGATCACGAGGTCAGGAGTTCGAGACCA

GCCTGACCAACATGGAGAAACCCCATCTCTACTAAAAATACAAAAATTAGCTAGGCGTGGTGCGGGCGCCTGTG

ATCCCACTACTCAGGAGGCTGGGGCAGCAGAATCGCTTGAACCCGGGAGGC

>FADS2

GTGGCTCACACCTGTAATCCAGCACTTTGGGAGACAGAAGCGGGTGGATCACTTGAGGTCAGGAGTTTGAAGACC

AGCCTGGGCAACATGGTGAAACCCCGCCTCTACTAAAAATACAAAAATTAGCCGGGCGTGGTTGTGGGCGCCTGT

AATCCCAGCTACTCGGGAGGCTGAGGCAGGAAAATCACTTGAACCCGGGAGGC

>hsamiR566

GGGCGCCTGTGATCCCAAC

>GarnAlu1

GTGGCTCATGCCTGTAATCCCAGCACTTTGGGAGGCTGAGACAGGTGGATCACGAGGTCAGGAGTTCGAGACCA  
GCCTGACCAACATGGAGAAACCCCATCTCTACTAAAAATACAAAATTAGCTAGGCGTGGTGGCGGGCGCCTGTG  
ATCCCACTACTCAGGAGGCTGGGGCAGCAGAATCGCTTGAACCCGGGAGGCGAAGGTTGCAGTGAGCCAAGAT  
CGCGCCATTGCACTCCAGCCTGGGTGACAGAGTGAGACTCCATCTCAAAAAACAAACAAACAAAA

>PRKRIR

GTGGCTCAGTCTGTAATCCCAGCACTTTGGGAAGCTGAGGCGGGAGGATCACCTGAGGTCGGGAGTTCAAGAC  
CAGCCTGACCAACATGGAGAACCCTCGTCTCTACTAAAAATACAAAAGAGCCGGGCGTGGTGGCACATGCCTGT  
GATCCCAGCTACTCGGGGGGCTGAGGCAGGAGAATTGCTTGAACCCGGGAGGCGGAGGTTGCGGTGAGCTGAG  
ATCGCACCTTGCACTCCAGCCTGGGCAACAAGAGCGAGACTCTGTCTCAAAAAAAAAAAAAAAAAAGAAAA

>hsamiR566

GGGCGCCTGTGATCCCAAC

>GarnAlu1

GGGCTGGGCACAGTGGCTCATGCCTGTAATCCCAGCACTTTGGGAGGCTGAGACAGGTGGATCACGAGGTCAGG  
AGTTCGAGACCAGCCTGACCAACATGGAGAAACCCCATCTCTACTAAAAATACAAAATTAGCTAGGCGTGGTGG  
CGGGCGCCTGTGATCCCACTACTCAGGAGGCTGGGGCAGCAGAATCGCTTGAACCCGGGAGGCGAAGGTTGCA  
GTGAGCCAAGATCGCGCCATTGCACTCCAGCCTGGGTGACAGAGTGAGACTCCATCTCAAAAAACAAACAAA

>C14orf79

GGGCTGGGCACAGTGGCTCACGCCTGTAATCCCAGCACTTTGGGAGGCTGAGGCTGACAGATCAGGAGGTCAGG  
AGTTCAAGATCTGCCTGGCCAACATAGTGAAACCCCGTCTCTACTAAAAATACAAAAAATAGCCGGGCGTGGTG  
ATGGGCGCCTGTCATCCCAGCTACTGGGGAGGCTGAGGCAGGAGAATCGCTTGAACCCGGGAGGCGGAGGTTGC  
AGGGAGCGGAGATCGCGCCACTGCACTCCAGCCTGGGGGACAGAGTGAGACTCTGTCTCAACAAACAAACAAA

>hsamiR566

GGGCGCCTGTGATCCCAAC

>GarnAlu1

AAAAATAAGCTGGGTGTGGTGGCTGACGCCTGTAATCCCAGCTAGTCAGGAGGCTGAGACAGGAGAATCGCTTG  
AACCCAGCAGATGGAGGTTGCAGTGAGC

>C14orf79

GGGCGCCTGTGATCCCAGCTACTGGGGAGGCTGAGGCAGGAGAATCGCTTGAACCCGGGAGGCGGAGGTTGCA  
GGGAGCGGAGATCGCGCCACTGCACTCCAGCCTGGGGGACAGAGTGAGACTCTGTCTCAACAAACAAACAAAA  
AAACAAATAAAAAACAGCATTCCCTGCAGGAGCACTGGGCTGTCTCATTTATTTGTTTACTTTTATTCAAC  
AACACGTGCCATCCTTCAACACCCCAACCCACCTCCCGTGCCCCCTCTATGCCTCACAGCACCTGCCCTGGAGTAGC  
TGACTTACTGCCGTTACTGTCTCCTCCAAGGAGTGGAAGCTCCGTGAGACCAGATATTTTGTGGTTTTGTTCACTC  
AAGTGCCTAGAAGTGTGCTGAGTACAAAACAGATGCTCCAAACTACGAGTACCAGTGCATGCTCAGGAGAACAA  
ATGAGCAAACCAACGGTGAATGTCTACTATGTGCCACACGTCACTGCTACGCACTGTGAGGGACTGAGAAGGTCT  
GCCTGCAGGAAGTTCAGTTCTAGTATGGAAGGGAAAATGAGTGCAAGGGCAGGTGCGGCAGCTCACACCTGTA  
AACCCAGCACTTTGGGAGACTGAGGAGGGCAAATCACTTGAAGTTCAGGAGTTTGAACCCAGCCTGAGCAACATA  
GCAAAACCTGTCTCTACAAAAATACAAAATTAGCTGGGTGTAGTGCGGGTGCCTGTAGTCCCAGTACTCAG  
GAGGCTGAGGCAGGAAGATCGCTTAAGCCTAGGAGACGGAGGCTGTAGTGAGC

>hsamiR566

GGGCGCCTGTGATCCCAAC

>GarnAlu1

GTGGCTCATGCCTGTAATCCCAGCACTTTGGGAGGCTGAGACAGGTGGATCACGAGGTCAGGAGTTCGAGACCA  
GCCTGACCAACATGGAGAAACCCCATCTCTACTAAAAATACAAAATTAGCTAGGCGTGGTGGCGGGCGCCTGTG  
ATCCCAACTACTCAGGAGGCTGGGGCAGCAGAATCGCTTGAACCCGGGAGGCGAAGGTTGCAGTGAGCCAAGAT  
CGCGCCATTGCACTCCAGCCTGGGTGACAGAGTGAGACT

>MED22

GTGGCTCACGCCTGTAATCCCAGCACTTTGGGAGGCCGAGGCAGGGATCACCTGAGGTCAGGAGTTTGAGACTA  
GCCTGACCAACATGGTGAACCCCACTCTACTAAAAATACAAAATTAGCCGGGCGTGATGGCAGGCGCCTGTA  
ATCCCAGCTACTCGGGAGGCTGAGGCAGGAGAATCGCTTGAACCCGGGAAGCACAGGTCGCAGTGAGCCGAGAT  
CGCGCCACTGCACTCCAGCCTGGGCGACAGGGGGAGACT

>hsamiR566

GGGCGCCTGTGATCCCAAC

>GarnAlu1

AAAAATAAGCTGGGTGTGGTGGCTGACGCCTGTAATCCCAGCTAGTCAGGAGGCTGAGACAGGAGAATCGCTTG  
AACCC

>MED22

AAAAATTAGCCGGGCGTGATGGCAGGCGCCTGTAATCCCAGCTACTCGGGAGGCTGAGGCAGGAGAATCGCTTG  
AACCC

>hsamiR566

GGGCGCCTGTGATCCCAAC

>GarnAlu1

GTGGCTCATGCCTGTAATCCCAGCACTTTGGGAGGCTGAGACAGGTGGATCACGAGGTCAGGAGTTCGAGACCA  
GCCTGACCAACATGGAGAAACCCCATCTCTACTAAAAATACAAAATTAGCTAGGCGTGGTGGCGGGCGCCTGTG  
ATCCCA

>FRRS1

GTGGCTCAAGCCTGTAATCCCAGCACTTTGGGAGGCGGAGGCGGGCATATCACGAGGTCAGGAGATAGAGACCA  
TCCTTGCCAACACAGTGAAACCCCGTCTCTACTAAAAATACAAAATTAGCCGGGCGTGGTGGCGGGCGCCTGT  
AATCCCA

>hsamiR566

GGGCGCCTGTGATCCCAAC

>GarnAlu1

ACAAAAATAAGCTGGGTGTGGTGGCTGACGCCTGTAATCCCAGC

>FRRS1

ACAAAAATTAGCCGGGCGTGGTGGCGGGCGCCTGTAATCCCAGC

>hsamiR566

GGGCGCCTGTGATCCCAAC

>GarnAlu1

GAGGTCAGGAGTTCGAGACCAGCCTGACCAACATGGAGAAACCCCATCTCTACTAAAAATACAAAATTAGCTAG  
GCGTGGTGGCGGGCGCCTGTGATCCCAACTACTCAGGAGGCTGGGGCAGCAGAATCGCTTGAACCCGGGAGGCG  
AAGGTTGCAGTGAGCCAAGATCGCGCCATTGCACTCCAGCCTGG

>SHC1

GAGGTCAGGAGTTCGAGGCTAGCCTAGCCAACATGGGGAAACCCCGTCTCTACTAAAAATACAAAAATTAGCCGG  
GCGTGGTGGTGGGCGCCTGTAATCCCAGCTACTCAGGAGGCTGAGGCAGGAGAATCACTTGAAGTCAAGGAGGCG  
GAGGTTGCAGTGAGCCGAGATCGCACCATTGCACTCCAGCCTGG

>hsamiR566

GGGCGCCTGTGATCCCAAC

>GarnAlu1

AAAAATAAGCTGGGTGTGGTGGCTGACGCCTGTAATCCCAGCTAGTCAGGAGGCTGAGACAGGAGAATCGCTTG  
AACCCAGCAGATGGAGGTTGCAGTGAGCCG

>SHC1

AAAAATTAGCCGGGCGTGGTGGTGGGCGCCTGTAATCCCAGCTACTCAGGAGGCTGAGGCAGGAGAATCACTTG  
AACTCAGGAGGCGGAGGTTGCAGTGAGCCG

>hsamiR566

GGGCGCCTGTGATCCCAAC

>GarnAlu1

GGCTGGGCACAGTGGCTCATGCCTGTAATCCCAGCACTTTGGGAGGCTGAGACAGGTGGATCACGAGGTCAGGA  
GTTTCGAGACCAGCCTGACCAACATGGAGAAAACCCCATCTCTACTAAAAATACAAAAATTAGCTAGGCGTGGTGGC  
GGGCGCCTGTGATCCCACTACTCAGGAGGCTGGGGCAGCAGAATCGCTTGAACCCGGGAGGCGAAGGTTGCAG  
TGAGCCAAGATCGCGCCATTGCACTCCAGCCTGGGTGACAGAGTGAGACTC

>CYBASC3

GGCTGGGCGCGGTAGCTCACGCCTGTAATCCCAGCACTTTGGGAAGCCGAGGCGGGCGGATCACATGAGGTCAG  
GAGTTTCGAGACCAGCCTGACCAACATGGAGAAAACCCCGTCTCTACTAAAAATACAAAAATTAGCCGGGCGCGGTA  
GCGGGCGCCTGTAATCCCAGCTACTTGGGAGGCTGAGGCAGGGGAATCGCTTGAACCCGGGAGGCGGAGGTTGC  
AGTGAGCCGAGATCGTGCCACTGCATTCCAGCCTGGGCGACAGAGTGAGACTC

>hsamiR566

GGGCGCCTGTGATCCCAAC

>GarnAlu1

GCTGGGTGTGGTGGCTGACGCCTGTAATCCCAGC

>CYBASC3

GCTGGGCGCGGTAGCTCACGCCTGTAATCCCAGCACTTTGGGAAGCCGAGGCGGGCGGATCACATGAGGTCAGG  
AGTTTCGAGACCAGCCTGACCAACATGGAGAAAACCCCGTCTCTACTAAAAATACAAAAATTAGCCGGGCGCGGTAG  
CGGGCGCCTGTAATCCCA

>hsamiR566

GGGCGCCTGTGATCCCAAC

>GarnAlu1

GGGCACAGTGGCTCATGCCTGTAATCCCAGCACTTTGGGAGGCTGAGACAGGTGGATCACGAGGTCAGGAGTTC  
GAGACCAGCCTGACCAACATGGAGAAAACCCCATCTCTACTAAAAATACAAAAATTAGCTAGGCGTGGTGGCGGGC  
GCCTGTGATCCCACTACTCAGGAGGCTGGGGCAGCAGAATCGCTTGAACCCGGGAGGCGAAGGTTGCAGTGAG  
CCAAGATCGCGCCATTGCACTCCAGCCTGGGTGACAGAGTGAGACTCCATCTCAAAAAA

>NLRP3

GGGCACAGTGGCTCACGCCTGTAATCCCAGCACTTTGAGAGGCCAAGGCAGGCAGATCACCTGAGCTGAGGAATT  
CAAGACCAGCCTGGCCAACATGGCAAACTGTGTCTCTACTAAAAGTACAAAAATGAGCCGGGTGTGGTGGCGG  
GCGCCTGTAATCCCAGCTACTCAGGAAGTTGAGGTAGGAGAATTGATTGAACCCGGGAAGTGGAGGCTGCAGTG  
AGCCAAGATCACGCCACTGCACTCCAGCCTAGGCGACACAGCAAGACTCCATCTCAAAAAA

>hsamiR566  
GGGCGCCTGTGATCCCAAC  
>GarnAlu1  
AAAAATAAGCTGGGTGTGGTGGCTGACGCCTGTAATCCCAGCTAGTCAGGAGGCTGAGACAGGAGAATCGCTTG  
AACCCAGCAGATGGAGGTTGCAGTGAGCC  
>NLRP3  
AAAAATGAGCCGGGTGTGGTGGCGGGCGCCTGTAATCCCAGCTACTCAGGAAGTTGAGGTAGGAGAATTGATTG  
AACCCGGGAAGTGGAGGCTGCAGTGAGCC

>hsamiR566  
GGGCGCCTGTGATCCCAAC  
>GarnAlu1  
GTGGCTGACGCCTGTAATCCCAGC  
>NLRP3  
GTGGCTCACGCCTGTAATCCCAGCACTTTGAGAGGCCAAGGCAGGCAGATCACCTGAGCTGAGGAATTCAAGACC  
AGCCTGGCCAACATGGCAAACACTGTGTCTCTACTAAAAGTACAAAAATGAGCCGGGTGTGGTGGCGGGCGCCTGT  
AATCCCA

>hsamiR566  
GGGCGCCTGTGATCCCAAC  
>GarnAlu1  
GTGGCTGACGCCTGTAATCCCAGC  
>NLRP3  
GTGGCTCACGCCTGTAATCCCAGCACTTTGAGAGGCCAAGGCAGGCAGATCACCTGAGCTGAGGAATTCAAGACC  
AGCCTGGCCAACATGGCAAACACTGTGTCTCTACTAAAAGTACAAAAATGAGCCGGGTGTGGTGGCGGGCGCCTGT  
AATCCCAGCTACTCAGGAAGTTGAGGTAGGAGAATTGATTGAAC

>hsamiR566  
GGGCGCCTGTGATCCCAAC  
>GarnAlu1  
GTGGCTGACGCCTGTAATCCCAGC  
>NLRP3  
GTGGCTCACGCCTGTAATCCCAGCACTTTGAGAGGCCAAGGCAGGCAGATCACCTGAGCTGAGGAATTCAAGACC  
AGCCTGGCCAACATGGCAAACACTGTGTCTCTACTAAAAGTACAAAAATGAGCCGGGTGTGGTGGCGGGCGCCTGT  
AATCCCAGCTACTCAGGAAGTTGAGGTAGGAGAATTGATTG

>hsamiR566  
GGGCGCCTGTGATCCCAAC  
>GarnAlu1  
CTGTAATCCCAGCACTTTGGGAGGCTGAGACAGGTGGATCACGAGGTCAGGAGTTTCGAGACCAGCCTGACCAAC  
ATGGAGAAACCCCATCTCTACTAAAAATACAAAAATTAGCTAGGCGTGGTGGCGGGCGCCTGTGATCCCAACTACT  
CAGGAGGCTGGGGCAGCAGAATCGCTTGAACCCGGGAGGCGAAGGTTGCAGTGAGCCAAGATCGCGCCATTGC  
ACTCCAGCCTG  
>MEI1  
CTGTAATCCCAGCACTTTGGGAGGCTGAGGAGGGTATATCACCTGAGGTCAGGAGTTCAAGACCAGCTTGGCCAA  
CATAGTGAAACCCCGTCCCTACAAAAATACAAAAATTAGCCGGCTATGATGGCGGGCGCCTGTAATCCCAGCTACT

TGGGAGGCTGAGGTGGGAGAATCGCTTGAACCTGGGAGGCAGAGGTTGCAGTGAGCTGAGATGGCACCATTGC  
ACTCCAGCCTG

>hsamiR566

GGGCGCCTGTGATCCCAAC

>GarnAlu1

GGCACAGTGGCTCATGCCTGTAATCCCAGCACTTTGGGAGGCTGAGACAGGTGGATCACGAGGTCAGGAGTTCCG  
AGACCAGCCTGACCAACATGGAGAAACCCCATCTCTACTAAAAATACAAAAATTAGCTAGGCGTGGTGGCGGGCG  
CCTGTGATCCCACTACTCAGGAGGCTGGGGCAGCAGAATCGCTTGAACCCGGGAGGCGAAGGTTGCAGTGAGC  
CAAGATCGCGCCATTGCACTCCAGCCTGGGTGACAGAGTGAGACTCCATCTCAA

>DDB1

GGCACAGTGGCTCACGCTTGAATTCCAGCACTTCGGGAGGCCGAGGCAGGCAGATCACAAAGGGCAAGAGTTCCG  
AGACCAGGCTGGCCAACACAGTGAAACCCCATCTGTACTAAAAATACAAAAATTAGCTGGGCATGGTGGCACGCG  
CCTGTAATCCCACTACTCAGGAGGCTGGGCCAGGAGAATCGCTTGAACCTGGGAGGTAGAGGTTGCAGTGAGC  
CGAGATCGTGCCACTGCACTCCAGCCTGGACGACAGGGTGAGACTCCGTCTCAA

>hsamiR566

GGGCGCCTGTGATCCCAAC

>GarnAlu1

AAAAATAAGCTGGGTGTGGTGGCTGACGCCTGTAATCCCAGCTAGTCAGGAGGCTGAGACAGGAGAATCGCTTG  
AACCCAGCAGATGGAGGTTGCAGTGAGCCGAATCTCGTACTGTACTGCAGCCTGGGCAACAGAGTGAGACT

>DDB1

AAAAATTAGCTGGGCATGGTGGCACGCGCCTGTAATCCCACTACTCAGGAGGCTGGGCCAGGAGAATCGCTTGA  
ACCTGGGAGGTAGAGGTTGCAGTGAGCCGAGATCGTGCCACTGCACTCCAGCCTGGACGACAGGGTGAGACT

>hsamiR566

GGGCGCCTGTGATCCCAAC

>GarnAlu1

GTGGCTCATGCCTGTAATCCCAGCACTTTGGGAGGCTGAGACAGGTGGATCACGAGGTCAGGAGTTCGAGACCA  
GCCTGACCAACATGGAGAAACCCCATCTCTACTAAAAATACAAAAATTAGCTAGGCGTGGTGGCGGGCGCCTGTG  
ATCCCACTACTCAGGAGGCTGGGGCAGCAGAATCGCTTGAACCCGGGAGGCGAAGGTTGCAGTGAGCCAAGAT  
CGCGCCATTGCACTCCAGCCTGGGTGACAGAGTGAGACTCCATCTCAAAAAA

>ADCY6

GTGGCTCACGTCCGTAATCCCAGCACTTTGGAAGGCCCTGGCAGGTAGATCACAAAGGTCAGGAGTTCAAGACCAG  
CCTGGCCAAGATGGTAAACCTCGTCTCTACTAAAAATACAAAAATTAGCCGGGCGTGGTGGCGGGCGCCTGTAA  
TCCCAGCTACTCAGGAGCTGAGGCAGGAGAATTGCTTGAACCCGGGTGGCAGAGGTTGCAGTGAGCAAAGATCG  
CGCCATTGCACTCCAGCCTGGGTGACAGAGTGAGACTCCGTCTCAAAAAA

>hsamiR566

GGGCGCCTGTGATCCCAAC

>GarnAlu1

AAAAATAAGCTGGGTGTGGTGGCTGACGCCTGTAATCCCAGCTAGTCAGGAGGCTGAGACAGGAGAATCGCTTG  
AACCC

>ADCY6

AAAAATTAGCCGGGCGTGGTGGCGGGCGCCTGTAATCCCAGCTACTCAGGAGCTGAGGCAGGAGAATTGCTTGA  
ACCC

>hsamiR566

GGGCGCCTGTGATCCCAAC

>GarnAlu1

CCTGTAATCCCAGCACTTTGGGAGGCTGAGACAGGTGGATCACGAGGTCAGGAGTTCGAGACCAGCCTGACCAAC  
ATGGAGAAACCCCATCTCTACTAAAAATACAAAAATTAGCTAGGCGTGGTGGCGGGCGCCTGTGATCCCACTACT  
CAGGAGGCTGGGGCAGCAGAATCGCTTGAACCCGGGAGGCCGAAGGTTGCAGTGAGCCAAGATCGCGCCATTGC  
ACTCCAGCCTGGGTGACAGAGTGAGACTCCATCTCAAAAAACAAACAAACAAA

>MLXIP

CCTGTAATCCCAGCACTTTGGGAGGCCAAGGTGGGCAGATCGCCTGAGATCAGGAGTTCGAGACCAGCCTGGCCA  
ACATGGTGAAACCCCATCTCTACTAAAAATACAAAAATTAGCTGGGTGTAGTGATGGCGCCTGTAATCCCAGCT  
AACTCGGGAGGCTGAGGCAGGAGAATCACTTGAACCCAGGAGGCCGAGGTTGCAGTGAGCCGAGATCACACCAC  
TGCCTCCAGCTAGGCGACAGAGTGAGACTCCATCTCAAAAAACAAACAAACAAA

>hsamiR566

GGGCGCCTGTGATCCCAAC

>GarnAlu1

CTGTAATCCCAGCACTTTGGGAGGCTGAGACAGGTGGATCACGAGGTCAGGAGTTCGAGACCAGCCTGACCAAC  
ATGGAGAAACCCCATCTCTACTAAAAATACAAAAATTAGCTAGGCGTGGTGGCGGGCGCCTGTGATCCCACTACT  
CAGGAGGCTGGGGCAGCAGAATCGCTTGAACCCGGGAGGCCGAAGGTTGCAGTGAGCCAAGATCGCGCCATTGC  
ACTCCAGCCTGGGTGACAGAGTGAGACTCCATCTCAAAAAACAAACAAACAAAAATAAGCTGGGTGTGGTGGCT  
GACGCTGTAATCCCAGC

>MLXIP

CTGTAATCCCAGCACCTTGGGAGGCCGAGGCAGGTGGATCACCAGAGGTCAGGAGTTCGAGACCAGCCTGGCCA  
ATGTGGTGAAACCCCATCTCTACTGAAGATACAAAAATTAGCCAGGTGTGGTGGCACATGCCTGTAATCTCAGCTAC  
TCAGGAGGATGAGGCAGGAGAATCACTTGAACCCGGGAGGCCAGAGGTTGCAGTGAGCCAAGATCATGTCATCTC  
ACTCCAGCCTGGGCAATAACAGTGAAACTCCGTCTCAAAAAAAAAAAAAAAAAAGAGAATAGAGACTGGGTGTGGGGG  
CTCACACCTGTAATCCCAGCACTTTGGGAGGCCAAGGTGGGCAGATCGCCTGAGATCAGGAGTTCGAGACCAGCC  
TGGCCAACATGGTGAAACCCCATCTCTACTAAAAATACAAAAATTAGCTGGGTGTAGTGATGGGCGCCTGTAATC  
CCA

>hsamiR566

GGGCGCCTGTGATCCCAAC

>GarnAlu1

ACAAAAATAAGCTGGGTGTGGTGGCTGACGCCTGTAATCCCAGCTAGTCAGGAGGCTGAGACAGGAGAATCGC  
TTGAACCCAGCAGATGGAGGTTGCAGTGAGCCG

>MLXIP

ACAAAAATTAGCTGGGTGTAGTGATGGGCGCCTGTAATCCCAGCTAACTCGGGAGGCTGAGGCAGGAGAATCA  
CTTGAACCCAGGAGGCCGAGGTTGCAGTGAGCCG

>hsamiR566

GGGCGCCTGTGATCCCAAC

>GarnAlu1

TGGCTCATGCCTGTAATCCCAGCACTTTGGGAGGCTGAGACAGGTGGATCACGAGGTCAGGAGTTCGAGACCAGC  
CTGACCAACATGGAGAAACCCCATCTCTACTAAAAATACAAAAATTAGCTAGGCGTGGTGGCGGGCGCCTGTGAT  
CCCACTACTCAGGAGGCTGGGGCAGCAGAATCGCTTGAACCCGGGAGGCCGAAGGTTGCAGTGAGCCAAGATCG  
CGCCATTGCACTCCAGCCTGGGTGACAGAGTGAGACTCCATCTCAAAAAACAAACAAACAAAA

>ANKLE2

TGGCTCACACCTGTAATCCCAGCATTTTGGGAAGCTGAGGCAGGTGGATCACCTGAGGTCAGGAATTCGAGACCA  
TCCTGGCCAACATGGTCAAACCCCGTCTCTATTAATAAATAACAAAAATTAGCCGGGCGTGGTGGCAGGCGCCTGTA  
ATCCCAGCTACTCGGGAGGCTGATGCAGGAGAATCGCTTGAACCCGGGAGGCGGAGCTTGCAGTGAGCCGAGAT  
CGCGCCACTGCACTCCAGCCTGGGCCACAGGGCGAGACTACATTTCAAAAAAAAAAAAAAAAAAAAAA

>hsamiR566

GGGCGCCTGTGATCCCAAC

>GarnAlu1

AAAAATAAGCTGGGTGTGGTGGCTGACGCCTGTAATCCCAGCTAGTCAGGAGGCTGAGACAGGAGAATCGCTTG  
AACCCAGCAGATGGAGGTTGCAGTGAGCCGCAATCTCGTACTGTACTGCAGCCTGGGCAACAGAGTGAGACT

>ANKLE2

AAAAATTAGCCGGGCGTGGTGGCAGGCGCCTGTAATCCCAGCTACTCGGGAGGCTGATGCAGGAGAATCGCTTG  
AACCCGGGAGGCGGAGCTTGCAGTGAGCCGAGATCGCGCCACTGCACTCCAGCCTGGGCCACAGGGCGAGACT

>hsamiR566

GGGCGCCTGTGATCCCAAC

>GarnAlu1

GGGCTGGGCACAGTGGCTCATGCCTGTAATCCCAGCACTTTGGGAGGCTGAGACAGGTGGATCACGAGGTCAGG  
AGTTCGAGACCAGCCTGACCAACATGGAGAAACCCCATCTCTACTAAAAATACAAAAATTAGCTAGGCGTGGTGG  
CGGGCGCCTGTGATCCCAACTACTCAGGAGGCTGGGGCAGCAGAATCGCTTGAACCCGGGAGGCGAAGGTTGCA  
GTGAGCCAAGATCGCGCCATTGCACTCCAGC

>SHMT1

GGGCTGGGCGCGGTGGCTCACACCTGTAATCCCAGCACTTTGGGAGGCTGAGACGGGCAGATCATGAGGTCAGG  
AGATCGAGACCATCCTGGCTAACACGGTCAAACCCCGTCTCTACTAAAAATGCAAAAAATTAGCCAGATATGGTG  
GCGGGCGCCTGTAATCCCAGCTACTTGGGAGGCTGAGGCAGGAGAATGGCGTGAACCCGGGAGGTGGAGCTTG  
CAGTGAGCCGAGATTGTGCCACTGCACTCCAGC

>hsamiR566

GGGCGCCTGTGATCCCAAC

>GarnAlu1

TGGTGGCTGACGCCTGTAATCCCAGCTAGTCAGGAGGCTGAGACAGGAGAATCGCTTGAACCCAGCAGATGGAG  
GTTGCAGTGAGCCG

>SHMT1

TGGTGGCGGGCGCCTGTAATCCCAGCTACTTGGGAGGCTGAGGCAGGAGAATGGCGTGAACCCGGGAGGTGGA  
GCTTGCAGTGAGCCG

>hsamiR566

GGGCGCCTGTGATCCCAAC

>GarnAlu1

CCTGTAATCCCAGCACTTTGGGAGGCTGAGACAGGTGGATCACGAGGTCAGGAGTTCGAGACCAGCCTGACCAAC  
ATGGAGAAACCCCATCTCTACTAAAAATACAAAAATTAGCTAGGCGTGGTGGCGGGCGCCTGTGATCCCAACTACT  
CAGGAGGCTGGGGCAGCAGAATCGCTTGAACCCGGGAGGCGAAGGTTGCAGTGAGCCAAGATCGCGCCATTGC  
ACTCCAGCCTGGGTGACA

>MTHFR

CCTGTAATCCCAGCACTTTGGGAGGCCGAGGTGGGTGGATCACCTGAGGCCAGGAGTTTGAGACCAGCCTGGCC  
AACATGGTCAAATCCCGACTCTACTAAAAATATAAAAAATTAGCCAGGTTTGGTGGCGGGCGCCTGTAATCCCAGCT



ACTCTGGAGGCTGAGGCAGGAGAATCGCTTGAACCCGGAAGGCAGAGGTTGCAGTGAACCAAGATTGTGCCATA  
GCACTCCAGCCTGGGCGACA

>hsamiR566

GGGCGCCTGTGATCCCAAC

>GarnAlu1

TGGTGGCTGACGCCTGTAATCCCAGCTAGTCAGGAGGCTGAGACAGGAGAATCGCTTGAACCCAGCAGATGGAG  
GTTGCAGTGA

>MTHFR

TGGTGGCGGGCGCCTGTAATCCCAGCTACTCTGGAGGCTGAGGCAGGAGAATCGCTTGAACCCGGAAGGCAGAG  
GTTGCAGTGA

>hsamiR566

GGGCGCCTGTGATCCCAAC

>GarnAlu1

GCTGGGCACAGTGGCTCATGCCTGTAATCCCAGCACTTTGGGAGGCTGAGACAGGTGGATCACGAGGTCAGGAG  
TTCGAGACCAGCCTGACCAACATGGAGAAACCCCATCTCTACTAAAAATACAAAAATTAGCTAGGCGTGGTGGCG  
GGCGCCTGTGATCCCAACTACTCAGGAGGCTGGGGCAGCAGAATCGCTTGAACCCGGGAGGCGAAGGTTGCAGT  
GAGCCAAGATCGCGCCATTGCACTCCAGCCTGGGTGACAGAGTGAGACTCCATCTCAAAAAACAAACAAACAAAA  
AA

>ADI1

GCTGGGCACTGTGGCTCACACCTATAATCCCAGAACCTTTGGGAGGCCAAGGTGGGCAGATCACCTGAGGTCAGG  
GGTTCAAGACCAGCCTGTCCAACATGGTGAACCCCATCTCTACTAAAAATACAAAAATTAGCCAGGCATGGTGGT  
CCACGCCTGTGATCCCAGCTACTCGGGAGGCTGAGGCAGGAGAATCACTTGAATCCAGGAGGCAGAGGTTGCAG  
TGAGCCAAGACTGCGCTACCAGCCTGGGTGACAGAGCGAGGCTCCATCTCAAAAAAAAAAAAAAAAAAAAAA

>hsamiR566

GGGCGCCTGTGATCCCAAC

>GarnAlu1

ACGCCTGTAATCCCAGCTAGTCAGGAGGCTGAGACAGGAGAATCGCTTGAACCCAGCAGATGGAGGTTGCAGTG  
AGCC

>ADI1

ACGCCTGTGATCCCAGCTACTCGGGAGGCTGAGGCAGGAGAATCACTTGAATCCAGGAGGCAGAGGTTGCAGTG  
AGCC

>hsamiR566

GGGCGCCTGTGATCCCAAC

>GarnAlu1

GTGGCTCATGCCTGTAATCCCAGCACTTTGGGAGGCTGAGACAGGTGGATCACGAGGTCAGGAGTTCGAGACCA  
GCCTGACCAACATGGAGAAACCCCATCTCTACTAAAAATACAAAAATTAGCTAGGCGTGGTGGCGGGCGCCTGTG  
ATCCCAACTACTCAGGAGGCTGGGGCAGCAGAATCGCTTGAACCCGGGAGGCGAAGGTTGCAGTGAGCCAAGAT  
CGCGCCATTGCACTCCAGCCTGGGTGACAGAGTGAGACTCCATCTCAAAA

>SRPK3

GTGGCTCATGCCTGTGATCCCAGCACTTTGGGAGGCTGAGGCGGGCAGATCACCTGAAGTCAGGAGTTTTGAGAC  
CAGCCTGTCCGACATGGGGAAACCCTGTCTTTACTAAAAATACAAAATTAGTCGGGTGTGGTGGCACACGCCTGT  
AGTCCCAGCTACTCGGGAGGCTGAGGCAGGAGAATTGCTTGAACCTCCGGGAAAAAGAGGTTGCAGTGAGCCGAG  
ATTGCGCCACTGCACTCCAGCCTGGGAGAGAGAGCGAGACTCCGTCTCAAAA

>hsamiR566

GGGCGCCTGTGATCCCAAC

>GarnAlu1

AGTGGCTCATGCCTGTAATCCCAGCACTTTGGGAGGCTGAGACAGGTGGATCACGAGGTCAGGAGTTCGAGACC  
AGCCTGACCAACATGGAGAAACCCCATCTCTACTAAAAATACAAAAATTAGCTAGGCGTGGTGGCGGGCGCCTGT  
GATCCCAACTACTCAGGAGGCTGGGGCAGCAGAATCGCTTGAACCCGGGAGGCCAAGGTTGCAGTGAGCCAAGA  
TCGCGCCATTGCACTCCAGCCTGGGTGAC

>BRF1

AGTGGCTCACGCTTGTAAATCCCAGCACTTTGGGAGGCCAAGGCAGGCGGATCACGTAAGGTGAGGAGTTCGAGA  
CCAGCCTGGCCAACATGGCGAAACCCCGTCTCCACTAAAAATACAAAAAATTAGCCAGGCTTGGTGGTGGGCGC  
CTGTAATCCCAGCTACTCGCGAGTCTGAGACAGGAGAACCATTGAACCTGAGAGGTGGAGGTTGCAGTGAGCTG  
AGATCCCGCCATTGCACTCCAGCCTGGGTGAC

>hsamiR566

GGGCGCCTGTGATCCCAAC

>GarnAlu1

GTGGCTCATGCCTGTAATCCCAGCACTTTGGGAG

>BRF1

GTGGCTCATGCCTGTGATCCAGTGCTTTGGGAG

>hsamiR566

GGGCGCCTGTGATCCCAAC

>GarnAlu1

GTGGCTCATGCCTGTAATCCCAGCACTTTGGGAGGCTGAGACAGGTGGATCACGAGGTCAGGAGTTCGAGACCA  
GCCTGACCAACATGGAGAAACCCCATCTCTACTAAAAATACAAAAATTAGCTAGGCGTGGTGGCGGGCGCCTGTG  
ATCCCAACTACTCAGGAGGCTGGGGCAGCAGAATCGCTTGAACCCGGGAGGCCAAGGTTGCAGTGAGCCAAGAT  
CGCGCCATTGCACTCCAGCCTGGGTGACAGAGTGAGACTCCATCTCAAAAAA

>AGAP10

GTGGCTCACGCTGTAATCCCAGCACTTTGGGAGGCTGAGGCGGGTGGATCATCTGAGGTCAGGAGTTCGAGACC  
AGCTTCGCTACATAGTGAAATCTCGTCTCCACTAAAAAATACAAAAATTAGCCGGGCGTGGTGGCAGGC  
GCCTGTAATCCCAGCTACTCGGGAGGCTGAGGCAGGAGAATCCCTTGAACCCGGGAGGCAGAGGTTGCAGTGAG  
CCAAGACTGTGCCACAGCACTCCAGCCTGGGTGACAGAGTGAGACTCCCTCTCAAAAAA

>hsamiR566

GGGCGCCTGTGATCCCAAC

>GarnAlu1

AAAAATAAGCTGGGTGTGGTGGCTGACGCCTGTAATCCCAGCTAGTCAGGAGGCTGAGACAGGAGAATCGCTTG  
AACCCAGCAGATGGAGGTTGCAGTGAGCC

>AGAP10

AAAAATTAGCCGGGCGTGGTGGCAGGCGCCTGTAATCCCAGCTACTCGGGAGGCTGAGGCAGGAGAATCCCTTG  
AACCCGGGAGGCAGAGGTTGCAGTGAGCC

>hsamiR566

GGGCGCCTGTGATCCCAAC

>GarnAlu1

GGGCACAGTGGCTCATGCCTGTAATCCCAGCACTTTGGGAGGCTGAGACAGGTGGATCACGAGGTCAGGAGTTC  
GAGACCAGCCTGACCAACATGGAGAAACCCCATCTCTACTAAAAATACAAAAAATTAGCTAGGCGTGGTGGCGGGC

GCCTGTGATCCCAACTACTCAGGAGGCTGGGGCAGCAGAATCGCTTGAACCCGGGAGGCGAAGGTTGCAGTGAG  
CCAAGATC

>TRIM34

GGGCGCAGTGGCTCACACCTGTAATCCCAGCACTTTGGGAGGCTGAGGCGGGTGGATCACTTGAGGTCAGGAGT  
TTGAGACCAGCCTGGCCAACATGTGCAAACCCTGTCTACAAAATACAAAATAGCCGGGCATGGTGGTGGGCG  
CCTGTAATCCCAGTTACTCGGGAGGCTGAGACAGGAGGATCGCTTGAACCCAGGAGACAGAGGTTGCAGTGAGC  
CGAGATC

>hsamiR570\_3p

CGAAAACAGCAATTACCTTTGC

>MADE1

CAGCAATTACCTTT

>ELAVL2

CAGCAATTACCTTT

>hsamiR574\_5p

TGAGTGTGTGTGTGTGAGTGTGT

>hAT-N53\_DR

GTGTGAGTGTGTGTGTGTGAGTGTGTG

>CACNG3

GTGTGAGTGTGTGTGTGTGTGTGTGTG

>hsamiR574\_5p

TGAGTGTGTGTGTGTGAGTGTGT

>hAT-N53\_DR

GTGTGTGTGTGAGTGTGTGT

>CACNG3

GTGTGTGTGTGTGTGTGTGTG

>hsamiR574\_5p

TGAGTGTGTGTGTGTGAGTGTGT

>hAT-N53\_DR

GTGTGAGTGTGTGTGTGTG

>LMO3

GTGTGAGTGTGTGTGTGTG

>hsamiR574\_5p

TGAGTGTGTGTGTGTGAGTGTGT

>hAT-N53\_DR

GTGAGTGTGTGTGTGTGAGTGTGTG

>PRDM6

GTGAGTGTGTGTGTGTGTGTGTG

>hsamiR574\_5p

TGAGTGTGTGTGTGTGAGTGTGT

>hAT-N53\_DR

GTGTGAGTGTGTGTGTGTGAGTGTGTG

>PRDM6  
GTGTGTGTGTGTGTGTGTGTGTGTGTGTGT

>hsamiR574\_5p  
TGAGTGTGTGTGTGTGAGTGTGT  
>hAT-N53\_DR  
GTGTGAGTGTGTGTGTGTGAGTGTGTGT  
>PRDM6  
GTGTGTGTGTGTGTGTGTGTGTGTGTGTGT

>hsamiR574\_5p  
TGAGTGTGTGTGTGTGAGTGTGT  
>hAT-N53\_DR





TGAGTGTGTGTGTGTGAGTGTGT  
>hAT-N53\_DR  
GTGTGAGTGTGTGTGTGTGAGTGTGTGT  
>PRDM6  
GTGTGTGTGTGTGTGTGTGTGTGTGTGTGTGTG

>hsamiR574\_5p  
TGAGTGTGTGTGTGTGAGTGTGT  
>hAT-N53\_DR  
GTGTGAGTGTGTGTGTGTGAGTGTGTGT  
>PRDM6  
GTGTGTGTGTGTGTGTGTGTGTGTGTGTGTGTG





>hsamiR574\_5p  
TGAGTGTGTGTGTGTGAGTGTGT  
>hAT-N53\_DR  
GTGTGAGTGTGTGTGTGTGAGTGTGTGT  
>PRDM6  
GTGTGTGTGTGTGTGTGTGTGTGTGTGTGTGTGTGTGTGTGTGTGAG

>hsamiR574\_5p  
TGAGTGTGTGTGTGTGAGTGTGT  
>hAT-N53\_DR  
GTGTGAGTGTGTGTGTGTGAGTGTGTG  
>PRDM6  
GTGTGTGTGTGTGTGTGTGTGTGTGTGTGTGAG

>hsamiR574\_5p  
TGAGTGTGTGTGTGTGAGTGTGT  
>hAT-N53\_DR  
GTGTGTGTGTGTGAGTGTGTGT  
>WISP2  
GTGTGTGTGTGTGTGTGTGTGT

>hsamiR574\_5p  
TGAGTGTGTGTGTGTGAGTGTGT  
>hAT-N53\_DR  
GTGTGTGTGTGTGAGTGTGTG  
>WISP2  
GTGTGTGTGTGTGTGTGTGTG

>hsamiR574\_5p  
TGAGTGTGTGTGTGTGAGTGTGT  
>hAT-N53\_DR  
CGTGTGAGTGTGTGTGTGTG  
>WISP2  
CGTGTGTGTGTGTGTGTGTGT

>hsamiR574\_5p  
TGAGTGTGTGTGTGTGAGTGTGT  
>hAT-N53\_DR  
CGTGTGAGTGTGTGTGTGTG  
>WISP2  
CGTGTGTGTGTGTGTGTGTGT

>hsamiR574\_5p  
TGAGTGTGTGTGTGTGAGTGTGT  
>hAT-N53\_DR  
GTGTGTGTGTGTGAGTGTGTGT  
>WISP2  
GTGTGTGTGTGTGTGTGTGTG

>hsamiR574\_5p  
TGAGTGTGTGTGTGTGAGTGTGT  
>hAT-N53\_DR  
GTGTGAGTGTGTGTGTGTGAGTGTGTGT  
>WISP2  
GTGTGTGTGTGTGTGTGTGTGCGCGTGTGT

>hsamiR574\_5p  
TGAGTGTGTGTGTGTGAGTGTGT  
>hAT-N53\_DR  
CGTGTGAGTGTGTGTGTGTG  
>WISP2  
CGTGTGTGTGTGTGTGTGTGTG

>hsamiR574\_5p  
TGAGTGTGTGTGTGTGAGTGTGT  
>hAT-N53\_DR  
GTGTGTGTGTGTGAGTGTGTGT  
>WISP2  
GTGTGTGTGTGTGTGTGTGTGCGCGTGTGT

>hsamiR574\_5p  
TGAGTGTGTGTGTGTGAGTGTGT  
>hAT-N53\_DR  
GTGTGTGTGTGTGAGTGTGTG  
>WISP2  
GTGTGTGTGTGTGTGTGTGTGCGCGTGTGT

>hsamiR574\_5p  
TGAGTGTGTGTGTGTGAGTGTGT  
>hAT-N53\_DR  
GTGTGAGTGTGTGTGTGTGAGTGTGTGT  
>WISP2  
GTGTGTGTGTGTGTGTGTGTGCGCGTGTGTGT

>hsamiR574\_5p  
TGAGTGTGTGTGTGTGAGTGTGT  
>hAT-N53\_DR  
CGTGTGAGTGTGTGTGTGTG  
>WISP2  
CGTGTGTGTGTGTGTGTGTGTGCGCGTGTGT

>hsamiR574\_5p  
TGAGTGTGTGTGTGTGAGTGTGT  
>hAT-N53\_DR  
GTGTGAGTGTGTGTGTGTGAGTGTGTGT  
>WISP2  
GTGTGTGTGTGTGTGTGTGTGCGCGTGTGTGTGTGA

>hsamiR574\_5p  
TGAGTGTGTGTGTGTGAGTGTGT  
>hAT-N53\_DR  
GTGTGAGTGTGTGTGTGTGAGTGTGTGT  
>WISP2  
GTGTGTGTGTGTGTGTGTGTGCGCGTGTGTGTGTGTGA

>hsamiR574\_5p  
TGAGTGTGTGTGTGTGAGTGTGT  
>hAT-N53\_DR  
GCGTGTGAGTGTGTGTGTGTGAGTGTGTGT  
>ACTR6  
GCGTGTGTGTGTGTGTGTGTGTGTGTGTGTGTGT

>hsamiR574\_5p  
TGAGTGTGTGTGTGTGAGTGTGT  
>hAT-N53\_DR  
GTGTGAGTGTGTGTGTGTGAGTGTGTGTC  
>ACTR6  
GTGTGTGTGTGTGTGTGTGTGTGTGTGTC

>hsamiR574\_5p  
TGAGTGTGTGTGTGTGAGTGTGT  
>hAT-N53\_DR  
GTGTGAGTGTGTGTGTGTGAGTGTGTGT  
>ACTR6  
GTGTGTGTGTGTGTGTGTGTGTGTGTGTGT

>hsamiR574\_5p  
TGAGTGTGTGTGTGTGAGTGTGT  
>hAT-N53\_DR  
GCGTGTGAGTGTGTGTGTGTGAGTGTGTGT  
>ACTR6  
GCGTGTGTGTGTGTGTGTGTGTGTGTGTGTGT

>hsamiR574\_5p  
TGAGTGTGTGTGTGTGAGTGTGT  
>hAT-N53\_DR  
GTGTGAGTGTGTGTGTGTGAGTGTGTGT  
>ACTR6  
GTGTGTGTGTGTGTGTGTGTGTGTGTGT

>hsamiR574\_5p  
TGAGTGTGTGTGTGTGAGTGTGT  
>hAT-N53\_DR  
GCGTGTGAGTGTGTGTGTGTGAGTGTGTGT  
>ACTR6  
GCGTGTGTGTGTGTGTGTGTGTGTGTGTGT

>hsamiR574\_5p  
TGAGTGTGTGTGTGAGTGTGT  
>hAT-N53\_DR  
GTGTGAGTGTGTGTGTGAGTGTGT  
>SEMA3A  
GTGTGCGTGTGTGTGTGTGTGTGT

>hsamiR574\_5p  
TGAGTGTGTGTGTGAGTGTGT  
>hAT-N53\_DR  
GTGTGTGTGTGTGAGTGTGTG  
>SEMA3A  
GTGTGTGTGTGTGTGTGTGTG

>hsamiR574\_5p  
TGAGTGTGTGTGTGAGTGTGT  
>hAT-N53\_DR  
GCGTGTGAGTGTGTGTGTGTG  
>SEMA3A  
GCGTGTGTGTGTGTGTGTGTGT

>hsamiR574\_5p  
TGAGTGTGTGTGTGAGTGTGT  
>hAT-N53\_DR  
GCGTGTGAGTGTGTGTGTGTG  
>SEMA3A  
GCGTGTGTGTGTGTGTGTGTGT

>hsamiR574\_5p  
TGAGTGTGTGTGTGAGTGTGT  
>hAT-N53\_DR  
GTGTGAGTGTGTGTGTGAGTGTGT  
>SEMA3A  
GTGTGCGTGTGTGTGTGTGTGTGTG

>hsamiR574\_5p  
TGAGTGTGTGTGTGAGTGTGT  
>hAT-N53\_DR  
GCGTGTGAGTGTGTGTGTGTG  
>SEMA3A  
GCGTGTGTGTGTGTGTGTGTGTG

>hsamiR574\_5p  
TGAGTGTGTGTGTGAGTGTGT  
>hAT-N53\_DR  
TGTGTGTGTGTGAGTGTGTG  
>RUNX1T1  
TGTGTGTGAGTGTGTGTG



>hsamiR574\_5p  
TGAGTGTGTGTGTGTGAGTGTGT  
>hAT-N53\_DR  
GTGTGAGTGTGTGTGTGTGAGTGTGTGT  
>CNOT3  
GTGTGTGTGTGTGTGTGTGTGTGTGTGTGTGTGTGTGTGTGTGTGT

>hsamiR574\_5p  
TGAGTGTGTGTGTGTGAGTGTGT  
>hAT-N53\_DR  
GGGCGTGTGAGTGTGTGTGTGTGAGTGTGTGT  
>CNOT3  
GGGCGTGTGTGTGTGTGTGTGTGTGTGTGTGTGTGTGTGTGTGTGTGT

>hsamiR574\_5p  
TGAGTGTGTGTGTGTGAGTGTGT  
>hAT-N53\_DR  
GTGTGAGTGTGTGTGTGTGAGTGTGTGT  
>MAPKAPK5  
GTGTGTGTGTGTGTGTGTGTGTGTGTGTGTGT

>hsamiR574\_5p  
TGAGTGTGTGTGTGTGAGTGTGT  
>hAT-N53\_DR  
TGTGAGTGTGTGTGTGTGAGTGTGTGT  
>MAPKAPK5  
TGTGTGTGTGTGTGTGTGTGTGTGTGTGTGTGT

>hsamiR574\_5p  
TGAGTGTGTGTGTGTGAGTGTGT  
>hAT-N53\_DR  
TGTGAGTGTGTGTGTGTGAGTGTGTGT  
>MAPKAPK5  
TGTGTGTGTGTGTGTGTGTGTGTGTGTGTGTGTGTGTGTGTGTGTGT

>hsamiR574\_5p  
TGAGTGTGTGTGTGTGAGTGTGT  
>hAT-N53\_DR  
TGTGAGTGTGTGTGTGTGAGTGTGTGT  
>MAPKAPK5  
TGTGTGTGTGTGTGTGTGTGTGTGTGTGTGTGTGTGTGTGTGTGT



>hsamiR574\_5p  
TGAGTGTGTGTGTGTGAGTGTGT  
>hAT-N53\_DR  
GTGTGAGTGTGTGTGTGTGAGTGTGTGT  
>NECAP1  
GTGTGTGTGTGTGTGTGTGTGTGTGTGTGT

>hsamiR574\_5p  
TGAGTGTGTGTGTGTGAGTGTGT  
>hAT-N53\_DR  
GTGTGAGTGTGTGTGTGTGAGTGTGTGT  
>NECAP1  
GTGTGTGTGTGTGTGTGTGTGTGTGTGTGT

>hsamiR574\_5p  
TGAGTGTGTGTGTGTGAGTGTGT  
>hAT-N53\_DR  
GTGTGAGTGTGTGTGTGTGAGTGTGTG  
>NECAP1  
GTGTGTGTGTGTGTGTGTGTGTGTGTGTG

>hsamiR574\_5p  
TGAGTGTGTGTGTGTGAGTGTGT  
>hAT-N53\_DR  
GTGTGAGTGTGTGTGTGTGAGTGTGTGT  
>NECAP1  
GTGTGTGTGTGTGTGTGTGTGTGTGTGTG

>hsamiR574\_5p  
TGAGTGTGTGTGTGTGAGTGTGT  
>hAT-N53\_DR  
GTGTGAGTGTGTGTGTGTGAGTGTGTGT  
>NECAP1  
GTGTGTGTGTGTGTGTGTGTGTGTGTGTG

>hsamiR574\_5p  
TGAGTGTGTGTGTGTGAGTGTGT  
>hAT-N53\_DR  
GTGTGAGTGTGTGTGTGTGAGTGTGTGT  
>TFAP4  
GTGTGTGTGTGTGTGTGTGTGTGTGTGTGT

>hsamiR574\_5p  
TGAGTGTGTGTGTGTGAGTGTGT  
>hAT-N53\_DR  
GTGTGAGTGTGTGTGTGTGAGTGTGTGT  
>TFAP4  
GTGTGTGTGTGTGTGTGTGTGTGTGTGTGT

>hsamiR574\_5p  
TGAGTGTGTGTGTGTGAGTGTGT  
>hAT-N53\_DR  
GTGTGAGTGTGTGTGTGTGAGTGTGTGT  
>TFAP4  
GTGTGTGTGTGTGTGTGTGTGTGTGTGTGTGTGT



>hsamiR574\_5p  
TGAGTGTGTGTGTGTGAGTGTGT  
>hAT-N53\_DR  
TGTGAGTGTGTGTGTGTGAGTGTGTGT  
>TFAP4  
TGTGTGTGTGTGTGTGTGTGTGTGTGTGTGTGTGTGTGTGTGTGTGTGT

>hsamiR574\_5p  
TGAGTGTGTGTGTGTGAGTGTGT  
>hAT-N53\_DR  
CGGGCGTGTGAGTGTGTGTGTGTGAGTGTGTGT  
>TFAP4  
CGGGCGTGTGTATGTGTGTGTGTGTGTGTGTGTGTGTGTGTGTGTGTGTGTGTGTGTGTGT

>hsamiR574\_5p  
TGAGTGTGTGTGTGTGAGTGTGT  
>hAT-N53\_DR  
TGTGAGTGTGTGTGTGTGAGTGTGTGT  
>TFAP4  
TGTGTGTGTGTGTGTGTGTGTGTGTGTGTGTGTGTGTGTGTGTGTGTGT

>hsamiR574\_5p  
TGAGTGTGTGTGTGTGAGTGTGT  
>hAT-N53\_DR  
CGGGCGTGTGAGTGTGTGTGTGTGAGTGTGTGT  
>TFAP4  
CGGGCGTGTGTATGTGTGTGTGTGTGTGTGTGTGTGTGTGTGTGTGTGTGTGTGTGTGTGT

>hsamiR574\_5p  
TGAGTGTGTGTGTGTGAGTGTGT  
>hAT-N53\_DR  
TGTGAGTGTGTGTGTGTGAGTGTGTGT  
>TFAP4  
TGTGTGTGTGTGTGTGTGTGTGTGTGTGTGTGTGTGTGTGTGTGTGTGT

>hsamiR574\_5p  
TGAGTGTGTGTGTGTGAGTGTGT  
>hAT-N53\_DR  
CGGGCGTGTGAGTGTGTGTGTGTGAGTGTGTGT  
>TFAP4  
CGGGCGTGTGTATGTGTGTGTGTGTGTGTGTGTGTGTGTGTGTGTGTGTGTGTGTGTGTGT

>hsamiR574\_5p  
TGAGTGTGTGTGTGTGAGTGTGT  
>hAT-N53\_DR  
TGTGAGTGTGTGTGTGTGAGTGTGTGT  
>TFAP4  
TGTGTGTGTGTGTGTGTGTGTGTGTGTGTGTGTGTGTGTGTGTGTGTGT

>hsamiR574\_5p  
TGAGTGTGTGTGTGTGAGTGTGT  
>hAT-N53\_DR  
CGGGCGTGTGAGTGTGTGTGTGTGAGTGTGTGT  
>TFAP4  
CGGGCGTGTGTATGTGTGTGTGTGTGTGTGTGTGTGTGTGT

>hsamiR574\_5p  
TGAGTGTGTGTGTGTGAGTGTGT  
>hAT-N53\_DR  
TGTGAGTGTGTGTGTGTGAGTGTGTGT  
>TFAP4  
TGTGTGTGTGTGTGTGTGTGTGTGTGTGTGTGT

>hsamiR574\_5p  
TGAGTGTGTGTGTGTGAGTGTGT  
>hAT-N53\_DR  
CGGGCGTGTGAGTGTGTGTGTGTGAGTGTGTGT  
>TFAP4  
CGGGCGTGTGTATGTGTGTGTGTGTGTGTGTGTGTGTGTGT

>hsamiR574\_5p  
TGAGTGTGTGTGTGTGAGTGTGT  
>hAT-N53\_DR  
TGTGAGTGTGTGTGTGTGAGTGTGTGT  
>TFAP4  
TGTGTGTGTGTGTGTGTGTGTGTGTGTGTGT

>hsamiR574\_5p  
TGAGTGTGTGTGTGTGAGTGTGT  
>hAT-N53\_DR  
CGGGCGTGTGAGTGTGTGTGTGTGAGTGTGTGT  
>TFAP4  
CGGGCGTGTGTATGTGTGTGTGTGTGTGTGTGTGTGTGTGT

>hsamiR574\_5p  
TGAGTGTGTGTGTGTGAGTGTGT  
>hAT-N53\_DR  
CGGGCGTGTGAGTGTGTGTGTGTGAGTGTGTGT  
>TFAP4  
CGGGCGTGTGTATGTGTGTGTGTGTGTGTGTGTGT

>hsamiR574\_5p  
TGAGTGTGTGTGTGTGAGTGTGT  
>hAT-N53\_DR  
CGGGCGTGTGAGTGTGTGTGTGTGAGTGTGTGT  
>TFAP4  
CGGGCGTGTGTATGTGTGTGTGTGTGTGTGTGT

>hsamiR574\_5p  
TGAGTGTGTGTGTGTGAGTGTGT  
>hAT-N53\_DR  
GTGTGAGTGTGTGTGTGTGAGTGTGTGT  
>TFAP4  
GTGTGTGTGTGTGTGTGTGTGTGTGTGTGTGT



>hsamiR574\_5p  
TGAGTGTGTGTGTGAGTGTGT  
>hAT-N53\_DR  
TGTGTGTGTGTGAGTGTGTGT  
>PTPRZ1  
TGTGTGTGTGTGTGTGTGTGAG

>hsamiR574\_5p  
TGAGTGTGTGTGTGAGTGTGT  
>hAT-N53\_DR  
GTGTGAGTGTGTGTGTGAGTGTGTGT  
>CASC3  
GTGTGTGTGTGTGTGTGTGTGTGTGT

>hsamiR574\_5p  
TGAGTGTGTGTGTGAGTGTGT  
>hAT-N53\_DR  
GTGTGAGTGTGTGTGTGAGTGTGTGT  
>CASC3  
GTGTGTGTGTGTGTGTGTGTGTGTGT

>hsamiR574\_5p  
TGAGTGTGTGTGTGAGTGTGT  
>hAT-N53\_DR  
GTGTGAGTGTGTGTGTGAGTGTGTGT  
>CASC3  
GTGTGTGTGTGTGTGTGTGTGTGTGT

>hsamiR574\_5p  
TGAGTGTGTGTGTGAGTGTGT  
>hAT-N53\_DR  
GTGTGAGTGTGTGTGTGAGTGTGTG  
>CASC3  
GTGTGTGTGTGTGTGTGTGTGTGTG

>hsamiR574\_5p  
TGAGTGTGTGTGTGAGTGTGT  
>hAT-N53\_DR  
GTGTGTGTGTGTGAGTGTGTGT  
>CASC3  
GTGTGTGTGTGTGTGTGTGTGT

>hsamiR574\_5p  
TGAGTGTGTGTGTGAGTGTGT  
>hAT-N53\_DR  
GTGTGTGTGTGTGAGTGTGTGT  
>CASC3  
GTGTGTGTGTGTGTGTGTGTGT



>hsamiR574\_5p  
TGAGTGTGTGTGTGAGTGTGT  
>hAT-N53\_DR  
GTGTGTGTGTGTGAGTGTGTGT  
>CASC3  
GTGTGTGTGTGTGTGTGTGTGTGT

>hsamiR574\_5p  
TGAGTGTGTGTGTGAGTGTGT  
>hAT-N53\_DR  
GTGTGAGTGTGTGTGTGAGTGTGTGT  
>CASC3  
GTGTGTGTGTGTGTGTGTGTGTGTGTGTGT

>hsamiR574\_5p  
TGAGTGTGTGTGTGTGAGTGTGT  
>hAT-N53\_DR  
GTGTGAGTGTGTGTGTGTGAGTGTGTGT  
>CASC3  
GTGTGTGTGTGTGTGTGTGTGTGTGTGTGTGTGTGTGTGTGTGTGTGTGTGTGTGTGTGT



>hsamiR574\_5p  
TGAGTGTGTGTGTGTGAGTGTGT  
>hAT-N53\_DR  
TGTGAGTGTGTGTGTGTGAGTGTGTGT  
>CASC3  
TGTGTGTGTGTGTGTGTGTGTGTGTGTGTGTGTGTGTGTGTGTGTGTGT

>hsamiR574\_5p  
TGAGTGTGTGTGTGTGAGTGTGT  
>hAT-N53\_DR  
GTGTGAGTGTGTGTGTGTGAGTGTGTGT  
>CASC3  
GTGTGTGTGTGTGTGTGTGTGTGTGTGTGTGTGTGTGTGTGTGTGTGT

>hsamiR574\_5p  
TGAGTGTGTGTGTGTGAGTGTGT  
>hAT-N53\_DR  
GTGTGAGTGTGTGTGTGTGAGTGTGTGT  
>CASC3  
GTGTGTGTGTGTGTGTGTGTGTGTGTGTGTGTGTGTGTGTGTGTGTGT

>hsamiR574\_5p  
TGAGTGTGTGTGTGTGAGTGTGT  
>hAT-N53\_DR  
TGTGAGTGTGTGTGTGTGAGTGTGTGT  
>CASC3  
TGTGTGTGTGTGTGTGTGTGTGTGTGTGTGTGTGTGTGTGTGTGTGTGT

>hsamiR574\_5p  
TGAGTGTGTGTGTGTGAGTGTGT  
>hAT-N53\_DR  
TGTGAGTGTGTGTGTGTGAGTGTGTGT  
>CASC3  
TGTGTGTGTGTGTGTGTGTGTGTGTGTGTGTGT

>hsamiR574\_5p  
TGAGTGTGTGTGTGTGAGTGTGT  
>hAT-N53\_DR  
GTGTGAGTGTGTGTGTGTGAGTGTGTGT  
>CASC3  
GTGTGTGTGTGTGTGTGTGTGTGTGTGTGTGGGGT

>hsamiR574\_5p  
TGAGTGTGTGTGTGTGAGTGTGT  
>hAT-N53\_DR  
GTGTGAGTGTGTGTGTGTGAGTGTGTGT  
>CASC3  
GTGTGTGTGTGTGTGTGTGTGTGTGTGTGTGGGGT

>hsamiR574\_5p  
TGAGTGTGTGTGTGTGAGTGTGT  
>hAT-N53\_DR  
GTGTGAGTGTGTGTGTGTGAGTGTGTGT  
>CASC3  
GTGTGTGTGTGTGTGTGTGTGTGTGTGTGTGGGGT

>hsamiR574\_5p  
TGAGTGTGTGTGTGTGAGTGTGT  
>hAT-N53\_DR  
GTGTGAGTGTGTGTGTGTGAGTGTGTGT  
>CASC3  
GTGTGTGTGTGTGTGTGTGTGTGTGTGTGTGTGTGTGTGTGTGGGGT

>hsamiR574\_5p  
TGAGTGTGTGTGTGTGAGTGTGT  
>hAT-N53\_DR  
GTGTGAGTGTGTGTGTGTGAGTGTGTGT  
>CASC3  
GTGTGTGTGTGTGTGTGTGTGTGTGTGTGTGTGTGTGTGTGGGGGAGGGGCG

>hsamiR574\_5p  
TGAGTGTGTGTGTGTGAGTGTGT  
>hAT-N53\_DR  
GTGTGAGTGTGTGTGTGTGAGTGTGTGT  
>CASC3  
GTGTGTGTGTGTGTGTGTGTGTGTGTGTGTGTGTGTGTGTGGGGGAGGGGCG

>hsamiR574\_5p  
TGAGTGTGTGTGTGTGAGTGTGT  
>hAT-N53\_DR  
GTGTGAGTGTGTGTGTGTGAGTGTGTGT  
>CASC3  
GTGTGTGTGTGTGTGTGTGTGTGTGTGTGTGTGTGTGTGTGGGGGAGGGGCG

>hsamiR574\_5p  
TGAGTGTGTGTGTGTGAGTGTGT  
>hAT-N53\_DR  
GTGTGAGTGTGTGTGTGTGAGTGTGTGT  
>CASC3  
GTGTGTGTGTGTGTGTGTGTGTGTGTGTGTGTGGG

>hsamiR574\_5p  
TGAGTGTGTGTGTGTGAGTGTGT  
>hAT-N53\_DR  
GTGTGAGTGTGTGTGTGTGAGTGTGTGT  
>CASC3  
GTGTGTGTGTGTGTGTGTGTGTGTGTGTGTGTGTGTGTGTGTGTGTGTTGGG

>hsamiR574\_5p  
TGAGTGTGTGTGTGTGAGTGTGT  
>hAT-N53\_DR  
GTGTGAGTGTGTGTGTGTGAGTGTGTGT  
>CASC3  
GTGTGTGTGTGTGTGTGTGTGTGTGTGTGTGTGTTGGGGGAGGGG

>hsamiR574\_5p  
TGAGTGTGTGTGTGTGAGTGTGT  
>hAT-N53\_DR  
GTGTGAGTGTGTGTGTGTGAGTGTGTGT  
>CASC3  
GTGTGTGTGTGTGTGTGTGTGTGTGTGTGTGTTGGGGGAGGGG

>hsamiR574\_5p  
TGAGTGTGTGTGTGTGAGTGTGT  
>hAT-N53\_DR  
GTGTGAGTGTGTGTGTGTGAGTGTGTGT  
>CASC3  
GTGTGTGTGTGTGTGTGTGTGTGTGTGTGTGTTGGGGGAGGGG

>hsamiR574\_5p  
TGAGTGTGTGTGTGTGAGTGTGT  
>hAT-N53\_DR  
GTGTGAGTGTGTGTGTGTGAGTGTGTGT  
>CASC3  
GTGTGTGTGTGTGTGTGTGTGTGTGTGTTG

>hsamiR574\_5p  
TGAGTGTGTGTGTGTGAGTGTGT  
>hAT-N53\_DR  
GTGTGAGTGTGTGTGTGTGAGTGTGTGT  
>CASC3  
GTGTGTGTGTGTGTGTGTGTGTGTGTTG

>hsamiR574\_5p  
TGAGTGTGTGTGTGTGAGTGTGT  
>hAT-N53\_DR  
GTGTGAGTGTGTGTGTGTGAGTGTGTGT  
>CASC3  
GTGTGTGTGTGTGTGTGTGTGTGTGTTG



>hsamiR574\_5p  
TGAGTGTGTGTGTGTGAGTGTGT  
>hAT-N53\_DR  
GTGTGAGTGTGTGTGTGTGAGTGTGTGT  
>CASC3  
GTGTGTGTGTGTGTGTGTGTGTGTGTGTGTGTGTGTTG

>hsamiR574\_5p  
TGAGTGTGTGTGTGTGAGTGTGT  
>hAT-N53\_DR  
GTGTGAGTGTGTGTGTGTGAGTGTGTGT  
>CASC3  
GTGTGTGTGTGTGTGTGTGTGTGTGTGTTGGGGGAGG

>hsamiR574\_5p  
TGAGTGTGTGTGTGTGAGTGTGT  
>hAT-N53\_DR  
GTGTGAGTGTGTGTGTGTGAGTGTGTGT  
>CASC3  
GTGTGTGTGTGTGTGTGTGTGTGTGTGTGTGTGTGTGTGTGTGTGGGGGAGG

>hsamiR574\_5p  
TGAGTGTGTGTGTGTGAGTGTGT  
>hAT-N53\_DR  
GTGTGAGTGTGTGTGTGTGAGTGTGTGT  
>CASC3  
GTGTGTGTGTGTGTGTGTGTGTGTGTGTGTGTGTGTGTGTGTGTGGGGGAGG

>hsamiR574\_5p  
TGAGTGTGTGTGTGTGAGTGTGT  
>hAT-N53\_DR  
GTGTGTGTGTGTGAGTGTGTGT  
>CASC3  
GTGTGTGTGTGTGTGTGTGTGTGT

>hsamiR574\_5p  
TGAGTGTGTGTGTGTGAGTGTGT  
>hAT-N53\_DR  
GTGTGTGTGTGTGAGTGTGTGT  
>CASC3  
GTGTGTGTGTGTGTGTGTGTGTGTGT

>hsamiR574\_5p  
TGAGTGTGTGTGTGTGAGTGTGT  
>hAT-N53\_DR  
GTGTGTGTGTGTGAGTGTGTGT  
>CASC3  
GTGTGTGTGTGTGTGTGTGTGTGTGTGT

>hsamiR574\_5p  
TGAGTGTGTGTGTGTGAGTGTGT  
>hAT-N53\_DR  
GTGTGAGTGTGTGTGTGTGAGTGTGTGT  
>CASC3  
GTGTGTGTGTGTGTGTGTGTGTGTGTGTGTGTGTGTGTGTGTGT

>hsamiR574\_5p  
TGAGTGTGTGTGTGTGAGTGTGT  
>hAT-N53\_DR  
GTGTGAGTGTGTGTGTGTGAGTGTGTGT  
>CASC3  
GTGTGTGTGTGTGTGTGTGTGTGTGTGTGTGTGTGTGTGTGTGT





>hsamiR574\_5p  
TGAGTGTGTGTGTGTGAGTGTGT  
>hAT-N53\_DR  
GTGTGAGTGTGTGTGTGTGAGTGTGTGT  
>CASC3  
GTGTGTGTGTGTGTGTGTGTGTGTGTGTGTGTGTTGGGGTGTGTGTGT

>hsamiR574\_5p  
TGAGTGTGTGTGTGTGAGTGTGT  
>hAT-N53\_DR  
GTGTGAGTGTGTGTGTGTGAGTGTGTGT  
>CASC3  
GTGTGTGTGTGTGTGTGTGTGTGTGTGTGTGTTGGGGTGTGTG

>hsamiR574\_5p  
TGAGTGTGTGTGTGTGAGTGTGT  
>hAT-N53\_DR  
GTGTGAGTGTGTGTGTGTGAGTGTGTGTC  
>KCNJ5  
GTGTGTGTGTGTGTGTGTGTGTGTGTGTC

>hsamiR574\_5p  
TGAGTGTGTGTGTGTGAGTGTGT  
>hAT-N53\_DR  
GTGTGAGTGTGTGTGTGTGAGTGTGTGT  
>KCNJ5  
GTGTGTGTGTGTGTGTGTGTGTGTGTGTGT

>hsamiR574\_5p  
TGAGTGTGTGTGTGTGAGTGTGT  
>hAT-N53\_DR  
GTGTGAGTGTGTGTGTGTGAGTGTGTGT  
>KCNJ5  
GTGTGTGTGTGTGTGTGTGTGTGTGTGTGTGT

>hsamiR574\_5p  
TGAGTGTGTGTGTGTGAGTGTGT  
>hAT-N53\_DR  
GTGTGAGTGTGTGTGTGTGAGTGTGTGT  
>KCNJ5  
GTGTGTGTGTGTGTGTGTGTGTGTGTGTGTGT

>hsamiR574\_5p  
TGAGTGTGTGTGTGTGAGTGTGT  
>hAT-N53\_DR  
GTGTGAGTGTGTGTGTGTGAGTGTGTGT  
>KCNJ5  
GTGTGTGTGTGTGTGTGTGTGTGTGTGTGTGT

>hsamiR574\_5p  
TGAGTGTGTGTGTGTGAGTGTGT  
>hAT-N53\_DR  
GTGTGAGTGTGTGTGTGTGAGTGTGTGT  
>KCNJ5  
GTGTGTGTGTGTGTGTGTGTGTGTGTGTGTGTGTGTGTGTGTGTGT

>hsamiR574\_5p  
TGAGTGTGTGTGTGTGAGTGTGT  
>hAT-N53\_DR  
TGTGAGTGTGTGTGTGTGAGTGTGTGT  
>KCNJ5  
TGTGTGTGTGTGTGTGTGTGTGTGTGTGTGTGTGTGTGTGTGTGTGT

>hsamiR574\_5p  
TGAGTGTGTGTGTGTGAGTGTGT  
>hAT-N53\_DR  
GTGTGAGTGTGTGTGTGTGAGTGTGTGT  
>KCNJ5  
GTGTGTGTGTGTGTGTGTGTGTGTGTGTGT

>hsamiR574\_5p  
TGAGTGTGTGTGTGTGAGTGTGT  
>hAT-N53\_DR  
TGTGAGTGTGTGTGTGTGAGTGTGTGT  
>KCNJ5  
TGTGTGTGTGTGTGTGTGTGTGTGTGTGTGTGTGTGTGTGTGTGTGT

>hsamiR574\_5p  
TGAGTGTGTGTGTGTGAGTGTGT  
>hAT-N53\_DR  
TGTGAGTGTGTGTGTGTGAGTGTGTGT  
>KCNJ5  
TGTGTGTGTGTGTGTGTGTGTGTGTGT

>hsamiR574\_5p  
TGAGTGTGTGTGTGTGAGTGTGT  
>hAT-N53\_DR  
TGAGTGTGTGTGTGTGAGTGTGTGT  
>IKZF4  
TGAGTGTGTGTGTGTGTGTGTGTGT

>hsamiR574\_5p  
TGAGTGTGTGTGTGTGAGTGTGT  
>hAT-N53\_DR  
GTGTGTGTGTGTGAGTGTGTG  
>IKZF4  
GTGTGTGTGTGTGTGTGTGTG

>hsamiR574\_5p  
TGAGTGTGTGTGTGTGAGTGTGT  
>hAT-N53\_DR  
TGAGTGTGTGTGTGTGAGTGTGTGT  
>IKZF4  
TGAGTGTGTGTGTGTGTGTGTGTG

>hsamiR574\_5p  
TGAGTGTGTGTGTGTGAGTGTGT  
>hAT-N53\_DR  
GTGTGAGTGTGTGTGTGTGAG  
>IKZF4  
GTGTGTGTGTGTGTGTGTGAG

>hsamiR574\_5p  
TGAGTGTGTGTGTGTGAGTGTGT  
>hAT-N53\_DR  
TGAGTGTGTGTGTGTGAGTGTGTGT  
>IKZF4  
TGAGTGTGTGTGTGTGTGTGTGTGAG

>hsamiR574\_5p  
TGAGTGTGTGTGTGTGAGTGTGT  
>hAT-N53\_DR  
GTGTGTGTGTGTGAGTGTGTG  
>IKZF4  
GTGTGTGTGTGTGTGTGTGTGAG



>hsamiR574\_5p  
TGAGTGTGTGTGTGAGTGTGT  
>hAT-N53\_DR  
GTGTGTGTGTGTGAGTGTGTGT  
>C6orf70  
GTGTGTGTGTGTGTGTGTGTGT

>hsamiR574\_5p  
TGAGTGTGTGTGTGTGAGTGTGT  
>hAT-N53\_DR  
GTGTGTGTGTGTGAGTGTGTGT  
>C6orf70  
GTGTGTGTGTGTGTGTGTGTGT

>hsamiR574\_5p  
TGAGTGTGTGTGTGTGAGTGTGT  
>hAT-N53\_DR  
TGTGAGTGTGTGTGTGTGAGTGTGT  
>C6orf70  
TGTGTGTGTGTGTGTGTGTGTGT

>hsamiR574\_5p  
TGAGTGTGTGTGTGTGAGTGTGT  
>hAT-N53\_DR  
TGTGTGTGTGTGAGTGTGTGT  
>C6orf70  
TGTGTGTGTGTGTGTGTGTGTGT

>hsamiR574\_5p  
TGAGTGTGTGTGTGTGAGTGTGT  
>hAT-N53\_DR  
GTGTGAGTGTGTGTGTGTGAGTGT  
>C6orf70  
GTGTGTGTGTGTGTGTGTGTGT

>hsamiR574\_5p  
TGAGTGTGTGTGTGTGAGTGTGT  
>hAT-N53\_DR  
TGTGTGTGTGTGAGTGTGTGT  
>C6orf70  
TGTGTGTGTGTGTGTGTGTGT

>hsamiR574\_5p  
TGAGTGTGTGTGTGTGAGTGTGT  
>hAT-N53\_DR  
TGTGTGTGTGTGAGTGTGTGT  
>C6orf70  
TGTGTGTGTGTGTGTGTGTGT

>hsamiR574\_5p  
TGAGTGTGTGTGTGAGTGTGT  
>hAT-N53\_DR  
AGTGTGTGTGTGTGAGTGTGTGT  
>DGKB  
AGTGTGTGTGTGTGTGTGTGT

>hsamiR574\_5p  
TGAGTGTGTGTGTGAGTGTGT  
>hAT-N53\_DR  
GTGTGAGTGTGTGTGTGAGTGTGTGT  
>DGKB  
GTGTGTGTGTGTGTGTGTGTGTGT

>hsamiR574\_5p  
TGAGTGTGTGTGTGTGAGTGTGT  
>hAT-N53\_DR  
GTGTGAGTGTGTGTGTGTGAGTGTGTGT  
>DGKB  
GTGTGTGTGTGTGTGTGTGTGTGTGTGTGTGTGTGTGTGTGTGTGTGT

>hsamiR574\_5p  
TGAGTGTGTGTGTGTGAGTGTGT  
>hAT-N53\_DR  
GTGTGAGTGTGTGTGTGTGAGTGTGTGT  
>DGKB  
GTGTGTGTGTGTGTGTGTGTGTGTGTGTGTGTGTGTGTGTGTGTGTGT

>hsamiR574\_5p  
TGAGTGTGTGTGTGTGAGTGTGT  
>hAT-N53\_DR  
AGTGTGTGTGTGTGAGTGTGTGT  
>DGKB  
AGTGTGTGTGTGTGTGTGTGTGTGTGTGTGTGTGTGTGTGTGTGTGTGT









>hsamiR574\_5p  
TGAGTGTGTGTGTGAGTGTGT  
>hAT-N53\_DR  
GTGTGTGTGTGTGAGTGTGTGT  
>SSB  
GTGTGTGTGTGTGTGTGTGTGT

>hsamiR574\_5p  
TGAGTGTGTGTGTGAGTGTGT  
>hAT-N53\_DR  
GTGTGTGTGTGTGAGTGTGTGT  
>SSB  
GTGTGTGTGTGTGTGTGTGTGT

>hsamiR574\_5p  
TGAGTGTGTGTGTGAGTGTGT  
>hAT-N53\_DR  
GTGTGAGTGTGTGTGTGAGTGTG  
>SSB  
GTGTGTGTGTGTGTGTGTGTGTG

>hsamiR574\_5p  
TGAGTGTGTGTGTGAGTGTGT  
>hAT-N53\_DR  
TGTGTGTGTGTGAGTGTGTGT  
>SSB  
TGTGTGTGTGTGTGTGTGTGTGT

>hsamiR574\_5p  
TGAGTGTGTGTGTGAGTGTGT  
>hAT-N53\_DR  
TGTGTGTGTGTGAGTGTGTGT  
>SSB  
TGTGTGTGTGTGTGTGTGTGTGT

>hsamiR574\_5p  
TGAGTGTGTGTGTGAGTGTGT  
>hAT-N53\_DR  
TGTGTGTGTGTGAGTGTGTGT  
>SSB  
TGTGTGTGTGTGTGTGTGTGTGT

>hsamiR574\_5p  
TGAGTGTGTGTGTGAGTGTGT  
>hAT-N53\_DR  
GTGTGTGTGTGTGAGTGTGTGT  
>SSB  
GTGTGTGTGTGTGTGTGTGTGTG



>hsamiR574\_5p  
TGAGTGTGTGTGTGAGTGTGT  
>hAT-N53\_DR  
GTGTGTGTGTGTGAGTGTGTGT  
>SSB  
GTGTGTGTGTGTGTGTGTGTGTG

>hsamiR574\_5p  
TGAGTGTGTGTGTGAGTGTGT  
>hAT-N53\_DR  
TGTGTGTGTGTGAGTGTGTGT  
>SSB  
TGTGTGTGTGTGTGTGTGTGTG

>hsamiR574\_5p  
TGAGTGTGTGTGTGAGTGTGT  
>hAT-N53\_DR  
TGTGAGTGTGTGTGTGAGTGTGTG  
>PDIA6  
TGTGTGTGTGTGTGTGTGTGTG

>hsamiR574\_5p  
TGAGTGTGTGTGTGAGTGTGT  
>hAT-N53\_DR  
GTGTGTGTGTGTGAGTGTGTGT  
>PDIA6  
GTGTGTGTGTGTGTGTGTGTGT

>hsamiR574\_5p  
TGAGTGTGTGTGTGAGTGTGT  
>hAT-N53\_DR  
GTGTGTGTGTGTGAGTGTGTGT  
>PDIA6  
GTGTGTGTGTGTGTGTGTGTGT

>hsamiR574\_5p  
TGAGTGTGTGTGTGAGTGTGT  
>hAT-N53\_DR  
GTGTGAGTGTGTGTGTGAGTGTG  
>PDIA6  
GTGTGTGTGTGTGTGTGTGTGTG

>hsamiR574\_5p  
TGAGTGTGTGTGTGAGTGTGT  
>hAT-N53\_DR  
TGTGTGTGTGTGAGTGTGTGT  
>PDIA6  
TGTGTGTGTGTGTGTGTGTGTG

>hsamiR574\_5p  
TGAGTGTGTGTGTGAGTGTGT  
>hAT-N53\_DR  
TGTGTGTGTGTGAGTGTGTGT  
>PDIA6  
TGTGTGTGTGTGTGTGTGTGT

>hsamiR574\_5p  
TGAGTGTGTGTGTGAGTGTGT  
>hAT-N53\_DR  
TGTGTGTGTGTGAGTGTGTGT  
>PDIA6  
TGTGTGTGTGTGTGTGTGTGT

>hsamiR574\_5p  
TGAGTGTGTGTGTGAGTGTGT  
>hAT-N53\_DR  
GTGTGTGTGTGTGAGTGTGTGT  
>PDIA6  
GTGTGTGTGTGTGTGTGTGTG

>hsamiR574\_5p  
TGAGTGTGTGTGTGAGTGTGT  
>hAT-N53\_DR  
GTGTGTGTGTGTGAGTGTGTGT  
>PDIA6  
GTGTGTGTGTGTGTGTGTGTG

>hsamiR574\_5p  
TGAGTGTGTGTGTGAGTGTGT  
>hAT-N53\_DR  
TGTGTGTGTGTGAGTGTGTGT  
>PDIA6  
TGTGTGTGTGTGTGTGTGTGTG

>hsamiR574\_5p  
TGAGTGTGTGTGTGAGTGTGT  
>hAT-N53\_DR  
GTGTGAGTGTGTGTGTGAGTGTGTGT  
>LIMD1  
GTGTGTGTGTGTGTGTGTGTGTGT

>hsamiR574\_5p  
TGAGTGTGTGTGTGAGTGTGT  
>hAT-N53\_DR  
GTGTGAGTGTGTGTGTGAGTGTGTGT  
>LIMD1  
GTGTGTGTGTGTGTGTGTGTGTGT

>hsamiR574\_5p  
TGAGTGTGTGTGTGTGAGTGTGT  
>hAT-N53\_DR  
GTGTGAGTGTGTGTGTGTGAGTGTGTGT  
>LIMD1  
GTGTGTGTGTGTGTGTGTGTGTGTGTGTGTGTGT



>hsamiR574\_5p  
TGAGTGTGTGTGTGTGAGTGTGT  
>hAT-N53\_DR  
CGTGTGAGTGTGTGTGTGTGAGTGTGTGT  
>LIMD1  
CGTGTGTGTGTGTGTGTGTGTGTGTGTGTGTGTGTGT

>hsamiR574\_5p  
TGAGTGTGTGTGTGTGAGTGTGT  
>hAT-N53\_DR  
GTGTGAGTGTGTGTGTGTGAGTGTGTGT  
>HAPLN1  
GTGTGTGTGTGCGTGTGTGAGTGTGTGT

>hsamiR574\_5p  
TGAGTGTGTGTGTGTGAGTGTGT  
>hAT-N53\_DR  
GTGTGTGTGTGTGAGTGTGTG  
>HAPLN1  
GTGTGTGTGTGTGCGTGTGTGAGTGTGT

>hsamiR574\_5p  
TGAGTGTGTGTGTGTGAGTGTGT  
>hAT-N53\_DR  
GAGTGTGTGTGTGTGAGTGTGTGT  
>HAPLN1  
GAGTGTGTGTGTGTGTGCGTGTGTGAGTGTGT

>hsamiR574\_5p  
TGAGTGTGTGTGTGTGAGTGTGT  
>hAT-N53\_DR  
GTGTGAGTGTGTGTGTGTGAGTGTGTGT  
>HAPLN1  
GTGTGAGAGTGTGTGTGTGTGTGCGTGTGTGAGTGTGT

>hsamiR574\_5p  
TGAGTGTGTGTGTGTGAGTGTGT  
>hAT-N53\_DR  
GTGTGTGTGTGTGAGTGTGTG  
>HAPLN1  
GTGTGTGTGTGTGCGTGTGTG

>hsamiR574\_5p  
TGAGTGTGTGTGTGTGAGTGTGT  
>hAT-N53\_DR  
GAGTGTGTGTGTGTGAGTGTGTGT  
>HAPLN1  
GAGTGTGTGTGTGTGTGCGTGTGT

>hsamiR574\_5p  
TGAGTGTGTGTGTGTGAGTGTGT  
>hAT-N53\_DR  
GTGTGAGTGTGTGTGTGTGAGTGTGTGT  
>HAPLN1  
GTGTGAGAGTGTGTGTGTGTGTGCGTGTGT

>hsamiR574\_5p  
TGAGTGTGTGTGTGTGAGTGTGT  
>hAT-N53\_DR  
GTGTGAGTGTGTGTGTGTGAGTGTGTGT  
>HAPLN1  
GTGTGAGAGTGTGTGTGTGTGTGCGTGT

>hsamiR574\_5p  
TGAGTGTGTGTGTGTGAGTGTGT  
>hAT-N53\_DR  
GTGTGAGTGTGTGTGTGTGAGTGTGTGT  
>HAPLN1  
GTGTGTGTGTGCGTGTGTGAGTGTGTGTG

>hsamiR574\_5p  
TGAGTGTGTGTGTGTGAGTGTGT  
>hAT-N53\_DR  
GTGTGTGTGTGTGAGTGTGTG  
>HAPLN1  
GTGTGTGTGTGTGCGTGTGTGAGTGTGTGTG

>hsamiR574\_5p  
TGAGTGTGTGTGTGTGAGTGTGT  
>hAT-N53\_DR  
GAGTGTGTGTGTGTGAGTGTGTGT  
>HAPLN1  
GAGTGTGTGTGTGTGTGCGTGTGTGAGTGTGTGTG

>hsamiR574\_5p  
TGAGTGTGTGTGTGTGAGTGTGT  
>hAT-N53\_DR  
GTGTGAGTGTGTGTGTGTGAGTGTGTGT  
>TIAM2  
GTGTGTGTGTGTGTGTGTGTGTGTGTGTGT

>hsamiR574\_5p  
TGAGTGTGTGTGTGTGAGTGTGT  
>hAT-N53\_DR  
GTGTGAGTGTGTGTGTGTGAGTGTGTGT  
>TIAM2  
GTGTGTGTGTGTGTGTGTGTGTGTGTGTGT

>hsamiR574\_5p  
TGAGTGTGTGTGTGTGAGTGTGT  
>hAT-N53\_DR  
GTGTGAGTGTGTGTGTGTGAGTGTGTGT  
>TIAM2  
GTGTGTGTGTGTGTGTGTGTGTGTGTGTGT

>hsamiR574\_5p  
TGAGTGTGTGTGTGTGAGTGTGT  
>hAT-N53\_DR  
GTGTGAGTGTGTGTGTGTGAGTGTGTGT  
>HMGA2  
GTGTGAGTGTGTGTGAGTGTGAGTGTGTGT

>hsamiR574\_5p  
TGAGTGTGTGTGTGTGAGTGTGT  
>hAT-N53\_DR  
GTGTGTGTGAGTGTGTGT  
>HMGA2  
GTGTGTGTGAGTGTGTGTGAGTGTGAGTGTGT

>hsamiR574\_5p  
TGAGTGTGTGTGTGTGAGTGTGT  
>hAT-N53\_DR  
GTGTGAGTGTGTGTGTGTGAGTGTG  
>HMGA2  
GTGTGTGTGAGTGTGTGTGAGTGTGAGTGTGT

>hsamiR574\_5p  
TGAGTGTGTGTGTGTGAGTGTGT  
>hAT-N53\_DR  
GTGTGTGTGAGTGTGTGT  
>HMGA2  
GTGTGTGTGAGTGTGTGT

>hsamiR574\_5p  
TGAGTGTGTGTGTGTGAGTGTGT  
>hAT-N53\_DR  
GTGTGAGTGTGTGTGTGTGAGTGTG  
>HMGA2  
GTGTGTGTGAGTGTGTGTGAGTGTG

>hsamiR574\_5p  
TGAGTGTGTGTGTGTGAGTGTGT  
>hAT-N53\_DR  
GTGTGTGTGAGTGTGTGT  
>HMGA2  
GTGTGTGTGAGTGTGTGTGAGTGTG

>hsamiR574\_5p  
TGAGTGTGTGTGTGTGAGTGTGT  
>hAT-N53\_DR  
GTGTGTGTGAGTGTGTGT  
>HMGA2  
GTGTGTGTGAGTGTGTGTGAGTGTGAGTGTGTG

>hsamiR574\_5p  
TGAGTGTGTGTGTGTGAGTGTGT  
>hAT-N53\_DR  
GTGTGAGTGTGTGTGTGTGAGTGTG  
>HMGA2  
GTGTGTGTGAGTGTGTGTGAGTGTGAGTGTGTG

>hsamiR574\_5p  
TGAGTGTGTGTGTGTGAGTGTGT  
>hAT-N53\_DR  
GTGTGAGTGTGTGTGTGTGAGTGTGTGT  
>HMGA2  
GTGTGAGTGTGTGTGAGTGTGAGTGTGTGTG

>hsamiR574\_5p  
TGAGTGTGTGTGTGTGAGTGTGT  
>hAT-N53\_DR  
GTGTGAGTGTGTGTGTGTGAGTGTG  
>HMGA2  
GTGTGTGTGAGTGTGTGTGAGTGTGAGTGTGTGTG



>hsamiR574\_5p  
TGAGTGTGTGTGTGTGAGTGTGT  
>hAT-N53\_DR  
GTGTGAGTGTGTGTGTGTGAGTGTGTGT  
>FRMD4A  
GTGTGTGTGTGTGTGTGTGTGTGTGTGTGT

>hsamiR574\_5p  
TGAGTGTGTGTGTGTGAGTGTGT  
>hAT-N53\_DR  
GTGTGAGTGTGTGTGTGTGAGTGTGTGT  
>FRMD4A  
GTGTGTGTGTGTGTGTGTGTGTGTGTGTGTGTGTGTGTGTGTGTGTGTGTGTGTGTGTGT

>hsamiR574\_5p  
TGAGTGTGTGTGTGTGAGTGTGT  
>hAT-N53\_DR  
GTGTGAGTGTGTGTGTGTGAGTGTGTGT  
>FRMD4A  
GTGTGTGTGTGTGTGTGTGTGTGTGTGTGTGTGTGTGTGTGTGTGTGTGTGTGTGTGTGT

>hsamiR574\_5p  
TGAGTGTGTGTGTGTGAGTGTGT  
>hAT-N53\_DR  
GTGTGAGTGTGTGTGTGTGAGTGTGTGT  
>FRMD4A  
GTGTGTGTGTGTGTGTGTGTGTGTGTGTGTGTGTGTGTGTGTGTGTGTGTGTGTGTGTGT

>hsamiR574\_5p  
TGAGTGTGTGTGTGTGAGTGTGT  
>hAT-N53\_DR  
TGTGAGTGTGTGTGTGTGAGTGTGTGT  
>FRMD4A  
TGTGTGTGTGTGTGTGTGTGTGTGTGTGTGTGTGTGTGTGTGTGTGTGTGTGTGTGTGTGT

>hsamiR574\_5p  
TGAGTGTGTGTGTGTGAGTGTGT  
>hAT-N53\_DR  
TGTGAGTGTGTGTGTGTGAGTGTGTGT  
>FRMD4A  
TGTGTGTGTGTGTGTGTGTGTGTGTGTGTGTGTGTGTGTGTGTGTGT

>hsamiR574\_5p  
TGAGTGTGTGTGTGTGAGTGTGT  
>hAT-N53\_DR  
GAGTGTGTGTGTGTGAGTGTGTGT  
>RABGAP1L  
GAGTGTGTGTGTGTGTGTGTGTGTGT

>hsamiR574\_5p  
TGAGTGTGTGTGTGTGAGTGTGT  
>hAT-N53\_DR  
GTGTGAGTGTGTGTGTGTGAGTGTGTGT  
>RABGAP1L  
GTGTGAGAGTGTGTGTGTGTGTGTGTGT

>hsamiR574\_5p  
TGAGTGTGTGTGTGTGAGTGTGT  
>hAT-N53\_DR  
GTGTGAGTGTGTGTGTGTGAGTGTGTGT  
>RABGAP1L  
GTGTGTGTGTGTGTGTGTGTGTGTGTGT

>hsamiR574\_5p  
TGAGTGTGTGTGTGTGAGTGTGT  
>hAT-N53\_DR  
GTGTGAGTGTGTGTGTGTGAGTGTGTGT  
>RABGAP1L  
GTGTGTGTGTGTGTGTGTGTGTGTGTGTGTGTGTGTGTGTGTGTGTGT

>hsamiR574\_5p  
TGAGTGTGTGTGTGTGAGTGTGT  
>hAT-N53\_DR  
GAGTGTGTGTGTGTGAGTGTGTGT  
>RABGAP1L  
GAGTGTGTGTGTGTGTGTGTGTGTGTGTGTGTGTGTGTGTGTGTGTGT

>hsamiR574\_5p  
TGAGTGTGTGTGTGTGAGTGTGT  
>hAT-N53\_DR  
GAGTGTGTGTGTGTGAGTGTGTGT  
>RABGAP1L  
GAGTGTGTGTGTGTGTGTGTGTGTGTGTGTGTGTGTGTGTGTGTGTGT

>hsamiR574\_5p  
TGAGTGTGTGTGTGTGAGTGTGT  
>hAT-N53\_DR  
GTGTGAGTGTGTGTGTGTGAGTGTGTGT  
>RABGAP1L  
GTGTGAGAGTGTGTGTGTGTGTGTGTGTGTGTGTGTGTGTGTGTGTGTGTGTGT

>hsamiR574\_5p  
TGAGTGTGTGTGTGAGTGTGT  
>hAT-N53\_DR  
GAGTGTGTGTGTGAGTGTGTGT  
>RABGAP1L  
GAGTGTGTGTGTGTGTGTGTGTGTGTGTGTGTGTGT

>hsamiR574\_5p  
TGAGTGTGTGTGTGAGTGTGT  
>hAT-N53\_DR  
GTGTGAGTGTGTGTGTGAGTGTGTGT  
>RABGAP1L  
GTGTGAGAGTGTGTGTGTGTGTGTGTGTGTGTGTGTGTGTGTGTGTGTGTGTGT

>hsamiR574\_5p  
TGAGTGTGTGTGTGAGTGTGT  
>hAT-N53\_DR  
GAGTGTGTGTGTGAGTGTGTGT  
>RABGAP1L  
GAGTGTGTGTGTGTGTGTGTGTGTGTGTGTGTGTGT

>hsamiR574\_5p  
TGAGTGTGTGTGTGAGTGTGT  
>hAT-N53\_DR  
GTGTGAGTGTGTGTGTGAGTGTGTGT  
>RABGAP1L  
GTGTGAGAGTGTGTGTGTGTGTGTGTGTGTGTGTGTGTGTGTGTGTGTGTGTGT

>hsamiR574\_5p  
TGAGTGTGTGTGTGAGTGTGT  
>hAT-N53\_DR  
GAGTGTGTGTGTGAGTGTGTGT  
>RABGAP1L  
GAGTGTGTGTGTGTGTGTGTGTGTGTGTGTGTGTGT

>hsamiR574\_5p  
TGAGTGTGTGTGTGAGTGTGT  
>hAT-N53\_DR  
GTGTGAGTGTGTGTGTGAGTGTGTGT  
>RABGAP1L  
GTGTGAGAGTGTGTGTGTGTGTGTGTGTGTGTGTGTGTGTGTGTGTGTGTGTGT

>hsamiR574\_5p  
TGAGTGTGTGTGTGAGTGTGT  
>hAT-N53\_DR  
GAGTGTGTGTGTGAGTGTGTGT  
>RABGAP1L  
GAGTGTGTGTGTGTGTGTGTGTGTGTGTGTGTGTGT

>hsamiR574\_5p  
TGAGTGTGTGTGTGTGAGTGTGT  
>hAT-N53\_DR  
GTGTGAGTGTGTGTGTGAGTGTGTGT  
>RABGAP1L  
GTGTGAGAGTGTGTGTGTGTGTGTGTGTGTGTGTGTGTGTGTGT

>hsamiR574\_5p  
TGAGTGTGTGTGTGTGAGTGTGT  
>hAT-N53\_DR  
GAGTGTGTGTGTGTGAGTGTGTGT  
>RABGAP1L  
GAGTGTGTGTGTGTGTGTGTGTGTGTGTGTGTGTGT

>hsamiR574\_5p  
TGAGTGTGTGTGTGTGAGTGTGT  
>hAT-N53\_DR  
GTGTGAGTGTGTGTGTGTGAGTGTGTGT  
>RABGAP1L  
GTGTGAGAGTGTGTGTGTGTGTGTGTGTGTGTGTGTGTGT

>hsamiR574\_5p  
TGAGTGTGTGTGTGTGAGTGTGT  
>hAT-N53\_DR  
GAGTGTGTGTGTGTGAGTGTGTGT  
>RABGAP1L  
GAGTGTGTGTGTGTGTGTGTGTGTGTGTGTGTGTGT

>hsamiR574\_5p  
TGAGTGTGTGTGTGTGAGTGTGT  
>hAT-N53\_DR  
GTGTGAGTGTGTGTGTGTGAGTGTGTGT  
>RABGAP1L  
GTGTGAGAGTGTGTGTGTGTGTGTGTGTGTGTGTGTGTGT

>hsamiR574\_5p  
TGAGTGTGTGTGTGTGAGTGTGT  
>hAT-N53\_DR  
GAGTGTGTGTGTGTGAGTGTGTGT  
>RABGAP1L  
GAGTGTGTGTGTGTGTGTGTGTGTGT

>hsamiR574\_5p  
TGAGTGTGTGTGTGTGAGTGTGT  
>hAT-N53\_DR  
GTGTGAGTGTGTGTGTGTGAGTGTGTGT  
>RABGAP1L  
GTGTGAGAGTGTGTGTGTGTGTGTGTGTGTGTGTGTGTGT

>hsamiR574\_5p  
TGAGTGTGTGTGTGAGTGTGT  
>hAT-N53\_DR  
GTGTGAGTGTGTGTGTGAGTGTGT  
>RABGAP1L  
GTGTGAGAGTGTGTGTGTGTGTGTGT

>hsamiR574\_5p  
TGAGTGTGTGTGTGAGTGTGT  
>hAT-N53\_DR  
TGTGAGTGTGTGTGTGT  
>LGI4  
TGTGAGTGTGTGTGTGT

>hsamiR574\_5p  
TGAGTGTGTGTGTGAGTGTGT  
>hAT-N53\_DR  
AGTGTGTGTGTGTGAGTGTGTGT  
>SCRG1  
AGTGTGTGTGTGTGTGTGTGTGT

>hsamiR574\_5p  
TGAGTGTGTGTGTGAGTGTGT  
>hAT-N53\_DR  
AGTGTGTGTGTGTGAGTGTGTGT  
>SCRG1  
AGTGTGTGTGTGTGTGTGTGTGTGT

>hsamiR574\_5p  
TGAGTGTGTGTGTGAGTGTGT  
>hAT-N53\_DR  
GTGTGAGTGTGTGTGTGAGTGTGT  
>SCRG1  
GTGTGTGTGTGTGTGTGTGTGTGT

>hsamiR574\_5p  
TGAGTGTGTGTGTGAGTGTGT  
>hAT-N53\_DR  
GTGTGTGTGTGTGAGTGTGTGT  
>SCRG1  
GTGTGTGTGTGTGTGTGTGTGT

>hsamiR574\_5p  
TGAGTGTGTGTGTGAGTGTGT  
>hAT-N53\_DR  
GTGTGTGTGTGTGAGTGTGTGT  
>SCRG1  
GTGTGTGTGTGTGTGTGTGTGT



>hsamiR574\_5p  
TGAGTGTGTGTGTGTGAGTGTGT  
>hAT-N53\_DR  
GTGTGAGTGTGTGTGTGTGAGTGTGTGTC  
>SCRG1  
GTGTGTGTGTGTGTGTGTGTTTGTGTGTC

>hsamiR574\_5p  
TGAGTGTGTGTGTGTGAGTGTGT  
>hAT-N53\_DR  
GTGTGAGTGTGTGTGTGTGAGTGTGTGT  
>SCRG1  
GTGTGTGTGTGTGTGTGTGTTTGTGT

>hsamiR574\_5p  
TGAGTGTGTGTGTGTGAGTGTGT  
>hAT-N53\_DR  
AGTGTGTGTGTGTGAGTGTGTGT  
>SCRG1  
AGTGTGTGTGTGTGTGTGTGTGTGT

>hsamiR574\_5p  
TGAGTGTGTGTGTGTGAGTGTGT  
>hAT-N53\_DR  
GCGTGTGAGTGTGTGTGTGTG  
>SAMD14  
GCGTGTGCGTGTGTGTGTGTGT

>hsamiR574\_5p  
TGAGTGTGTGTGTGTGAGTGTGT  
>hAT-N53\_DR  
GCGTGTGAGTGTGTGTGTGTG  
>SAMD14  
GCGTGTGCGTGTGTGTGTGTGTA

>hsamiR574\_5p  
TGAGTGTGTGTGTGTGAGTGTGT  
>hAT-N53\_DR  
GCGTGTGAGTGTGTGTGTGTG  
>SAMD14  
GCGTGTGCGTGTGTGTGTGTG

>hsamiR574\_5p  
TGAGTGTGTGTGTGTGAGTGTGT  
>hAT-N53\_DR  
CGTGTGAGTGTGTGTGTGTG  
>NINJ2  
CGTGTGAGTGTATGTGTGTG

>hsamiR574\_5p  
TGAGTGTGTGTGTGAGTGTGT  
>hAT-N53\_DR  
GTGTGAGTGTGTGTGTGAGTGTGTGC  
>CSDC2  
GTGTGTGTGTGTGTGTGTGTGTGTGC

>hsamiR574\_5p  
TGAGTGTGTGTGTGAGTGTGT  
>hAT-N53\_DR  
GTGTGAGTGTGTGTGTGAGTGTGTGT  
>CSDC2  
GTGTGTGTGTGTGTGTGTGTGTGTGT

>hsamiR574\_5p  
TGAGTGTGTGTGTGAGTGTGT  
>hAT-N53\_DR  
TGTGAGTGTGTGTGTGAGTGTGTGT  
>CSDC2  
TGTGTGTGTGTGTGTGTGTGTGTGTGT

>hsamiR574\_5p  
TGAGTGTGTGTGTGAGTGTGT  
>hAT-N53\_DR  
GTGTGAGTGTGTGTGTGAGTGTGTGT  
>CSDC2  
GTGTGTGTGTGTGTGTGTCTGTGTGT

>hsamiR574\_5p  
TGAGTGTGTGTGTGTGAGTGTGT  
>hAT-N53\_DR  
GTGTGAGTGTGTGTGTGTGAGTGTGTGT  
>CSDC2  
GTGTGTGTGTGTGTGTGTGTGTCTGTGT

>hsamiR574\_5p  
TGAGTGTGTGTGTGTGAGTGTGT  
>hAT-N53\_DR  
GTGTGAGTGTGTGTGTGTGAGTGTGTGT  
>CSDC2  
GTGTGTGTGTGTGTGTGTGTGTGTGTGT

>hsamiR574\_5p  
TGAGTGTGTGTGTGTGAGTGTGT  
>hAT-N53\_DR  
TGTGAGTGTGTGTGTGTGAGTGTGTGT  
>CSDC2  
TGTGTGTGTGTGTGTGTGTGTGTGTGTGTGT

>hsamiR574\_5p  
TGAGTGTGTGTGTGTGAGTGTGT  
>hAT-N53\_DR  
TGTGAGTGTGTGTGTGTGAGTGTGTGT  
>CSDC2  
TGTGTGTGTGTGTGTGTGTGTGTGTGTGT

>hsamiR574\_5p  
TGAGTGTGTGTGTGTGAGTGTGT  
>hAT-N53\_DR  
GTGTGAGTGTGTGTGTGTGAGTGTGTGT  
>AL445665.1  
GTGTGTGTGTGTGTGTGTGTGTGTGTGTGT

>hsamiR574\_5p  
TGAGTGTGTGTGTGTGAGTGTGT  
>hAT-N53\_DR  
GTGTGAGTGTGTGTGTGTGAGTGTGTG  
>AL445665.1  
GTGTGTGTGTGTGTGTGTGTGTGTGTGTG

>hsamiR574\_5p  
TGAGTGTGTGTGTGTGAGTGTGT  
>hAT-N53\_DR  
TGTGAGTGTGTGTGTGTGAGTGTGTGT  
>AL445665.1  
TGTGTGTGTGTGTGTGTGTGTGTGTGTGTGT

>hsamiR574\_5p  
TGAGTGTGTGTGTGTGAGTGTGT  
>hAT-N53\_DR  
TGTGAGTGTGTGTGTGTGAGTGTGTGT  
>AL445665.1  
TGTGTGTGTGTGTGTGTGTGTGTGTGTGT

>hsamiR574\_5p  
TGAGTGTGTGTGTGTGAGTGTGT  
>hAT-N53\_DR  
GTGTGAGTGTGTGTGTGTGAGTGTGTGT  
>AL445665.1  
GTGTGTGTGTGTGTGTGTGTGTGTGTGTGTG





>hsamiR574\_5p  
TGAGTGTGTGTGTGTGAGTGTGT  
>hAT-N53\_DR  
GTGTGAGTGTGTGTGTGTGAGTGTGTGT  
>ST8SIA3  
GTGTGTGTGTGTGTGTGTGTGTGTGTGTGTGTG

>hsamiR574\_5p  
TGAGTGTGTGTGTGTGAGTGTGT  
>hAT-N53\_DR  
TGTGAGTGTGTGTGTGTGAGTGTGTGT  
>ST8SIA3  
TGTGTGTGTGTGTGTGTGTGTGTGTGTGTGTGTG

>hsamiR574\_5p  
TGAGTGTGTGTGTGTGAGTGTGT  
>hAT-N53\_DR  
GTGTGAGTGTGTGTGTGTGAG  
>ST8SIA3  
GTGTGTGTGTGTGTGTGTGAG



>hsamiR574\_5p  
TGAGTGTGTGTGTGTGAGTGTGT  
>hAT-N53\_DR  
GTGTGAGTGTGTGTGTGTGAGTGTGTGT  
>ST8SIA3  
GTGTGTGTGTGTGTGTGTGTGTGTGTGTGTGAG

>hsamiR574\_5p  
TGAGTGTGTGTGTGTGAGTGTGT  
>hAT-N53\_DR  
GTGTGAGTGTGTGTGTGTGAGTGTGTG  
>ST8SIA3  
GTGTGTGTGTGTGTGTGTGTGTGTGTGAG

>hsamiR574\_5p  
TGAGTGTGTGTGTGTGAGTGTGT  
>hAT-N53\_DR  
TGTGAGTGTGTGTGTGTGAGTGTGTGT  
>ST8SIA3  
TGTGTGTGTGTGTGTGTGTGTGTGTGTGTGAG

>hsamiR574\_5p  
TGAGTGTGTGTGTGTGAGTGTGT  
>hAT-N53\_DR  
GTGTGAGTGTGTGTGTGTGAGTGTGTGT  
>CHRM2  
GTGTGAGTGTGTGTGTGTCTGTGTGTGTGTGTGTGTGTGTGTGTGTGT

>hsamiR574\_5p  
TGAGTGTGTGTGTGTGAGTGTGT  
>hAT-N53\_DR  
GTGTGAGTGTGTGTGTGTGAGTGTGTG  
>CHRM2  
GTGTGTGTGTGTGTGTGTGTGTGTGTGTG

>hsamiR574\_5p  
TGAGTGTGTGTGTGTGAGTGTGT  
>hAT-N53\_DR  
TGTGAGTGTGTGTGTGTGAGTGTGTGT  
>CHRM2  
TGTGTGTGTGTGTGTGTGTGTGTGTGT

>hsamiR574\_5p  
TGAGTGTGTGTGTGTGAGTGTGT  
>hAT-N53\_DR  
GTGTGAGTGTGTGTGTGTGAGTGTGTGT  
>CHRM2  
GTGTGAGTGTGTGTGTGTCTGTGTGTGTGTGTGTGTGTGTGTGTGT

>hsamiR574\_5p  
TGAGTGTGTGTGTGTGAGTGTGT  
>hAT-N53\_DR  
GTGTGAGTGTGTGTGTGTGAGTGTGTGT  
>CHRM2  
GTGTGAGTGTGTGTGTGTCTGTGTGTGTGTGTGTGTGTGTGTGTGT

>hsamiR574\_5p  
TGAGTGTGTGTGTGTGAGTGTGT  
>hAT-N53\_DR  
GTGTGAGTGTGTGTGTGTGAGTGTGTGT  
>CHRM2  
GTGTGAGTGTGTGTGTGTCTGTGTGTGTGTGTGTGTGTGTGTGTGT

>hsamiR574\_5p  
TGAGTGTGTGTGTGTGAGTGTGT  
>hAT-N53\_DR  
TGTGAGTGTGTGTGTGTGAGTGTGTGT  
>CHRM2  
TGTGTGTGTGTGTGTGTGTGTGTGTGTG

>hsamiR574\_5p  
TGAGTGTGTGTGTGTGAGTGTGT  
>hAT-N53\_DR  
GTGTGAGTGTGTGTGTGTGAGTGTGTGT  
>CHRM2  
GTGTGAGTGTGTGTGTGTCTGTGTGTGTGTGTGTGTGT

>hsamiR574\_5p  
TGAGTGTGTGTGTGTGAGTGTGT  
>hAT-N53\_DR  
GTGTGAGTGTGTGTGTGTGAGTGTGTGT  
>CHRM2  
GTGTGAGTGTGTGTGTGTCTGTGTGTGTGTGTGT

>hsamiR574\_5p  
TGAGTGTGTGTGTGTGAGTGTGT  
>hAT-N53\_DR  
GTGTGAGTGTGTGTGTGTGAGTGTGTGT  
>CHRM2  
GTGTGAGTGTGTGTGTGTCTGTGTGTGTGT

>hsamiR574\_5p  
TGAGTGTGTGTGTGTGAGTGTGT  
>hAT-N53\_DR  
GTGTGTGAGTGTGTGT  
>CHRM2  
GTGTGTGAGTGTGTGTGTCTGTGTGTGTGT

>hsamiR574\_5p  
TGAGTGTGTGTGTGTGAGTGTGT  
>hAT-N53\_DR  
GTGTGAGTGTGTGTGTGTGAGTGTGTGT  
>CHRM2  
GTGTGAGTGTGTGTGTGTCTGTGTGTGTGT

>hsamiR574\_5p  
TGAGTGTGTGTGTGTGAGTGTGT  
>hAT-N53\_DR  
GTGTGTGAGTGTGTGT  
>CHRM2  
GTGTGTGAGTGTGTGTGTCTGTGTGTGTGT

>hsamiR574\_5p  
TGAGTGTGTGTGTGTGAGTGTGT  
>hAT-N53\_DR  
GTGTGTGAGTGTGTGT  
>CHRM2  
GTGTGTGAGTGTGTGTGTGT

>hsamiR574\_5p  
TGAGTGTGTGTGTGAGTGTGT  
>hAT-N53\_DR  
GTGTGTGTGTGTGAGTGTGTG  
>LHFPL1  
GTGTGTGTGTGTGTGTGTG

>hsamiR574\_5p  
TGAGTGTGTGTGTGAGTGTGT  
>hAT-N53\_DR  
TGTGTGTGTGTGAGTGTGTGT  
>LHFPL1  
TGTGTGTGTGTGTGTGTGTG

>hsamiR574\_5p  
TGAGTGTGTGTGTGAGTGTGT  
>hAT-N53\_DR  
TGTGTGTGTGTGAGTGTGTGT  
>LHFPL1  
TGTGTGTGTGTGTGTGTGTG

>hsamiR574\_5p  
TGAGTGTGTGTGTGAGTGTGT  
>hAT-N53\_DR  
GAGTGTGTGTGTGAGTGTGTGT  
>SLITRK2  
GAGTGTGTGTGTGTGTGTGTGT

>hsamiR574\_5p  
TGAGTGTGTGTGTGAGTGTGT  
>hAT-N53\_DR  
GTGTGAGTGTGTGTGTGAGTGTGTGT  
>SLITRK2  
GTGTGTGTGTGTGTGTGTGTGTGT

>hsamiR574\_5p  
TGAGTGTGTGTGTGAGTGTGT  
>hAT-N53\_DR  
GTGTGAGTGTGTGTGTGAGTGTGTGT  
>SLITRK2  
GTGTGTGTGTGTGTGTGTGTGTGT

>hsamiR574\_5p  
TGAGTGTGTGTGTGAGTGTGT  
>hAT-N53\_DR  
GAGTGTGTGTGTGAGTGTGTGT  
>SLITRK2  
GAGTGTGTGTGTGTGTGTGTGTGT

>hsamiR574\_5p  
TGAGTGTGTGTGTGAGTGTGT  
>hAT-N53\_DR  
GTGTGAGTGTGTGTGTGAGTGTGTG  
>SLITRK2  
GTGTGTGTGTGTGTGTGTGTGTGTG

>hsamiR574\_5p  
TGAGTGTGTGTGTGAGTGTGT  
>hAT-N53\_DR  
GAGTGTGTGTGTGAGTGTGTGT  
>SLITRK2  
GAGTGTGTGTGTGTGTGTGTGTGTGT

>hsamiR574\_5p  
TGAGTGTGTGTGTGAGTGTGT  
>hAT-N53\_DR  
GAGTGTGTGTGTGAGTGTGTGT  
>SLITRK2  
GAGTGTGTGTGTGTGTGTGTGTGTGT

>hsamiR574\_5p  
TGAGTGTGTGTGTGAGTGTGT  
>hAT-N53\_DR  
GAGTGTGTGTGTGAGTGTGTGT  
>SLITRK2  
GAGTGTGTGTGTGTGTGTGTGTGTGT

>hsamiR574\_5p  
TGAGTGTGTGTGTGAGTGTGT  
>hAT-N53\_DR  
GCGTGTGAGTGTGTGTGTGAGTGTGT  
>SLITRK2  
GCGTGTGTGTGTGTGTGTGTGTGTGT

>hsamiR574\_5p  
TGAGTGTGTGTGTGAGTGTGT  
>hAT-N53\_DR  
GTGTGAGTGTGTGTGTGAGTGTGT  
>SLITRK2  
GTGTGTGTGTGTGTGTGTGTGTGTG

>hsamiR574\_5p  
TGAGTGTGTGTGTGAGTGTGT  
>hAT-N53\_DR  
GTGTGAGTGTGTGTGTGAGTGTGT  
>SLITRK2  
GTGTGTGTGTGTGTGTGTGTGTGTG



>hsamiR574\_5p  
TGAGTGTGTGTGTGTGAGTGTGT  
>hAT-N53\_DR  
GTGTGAGTGTGTGTGTGTGAGTGTGTGT  
>KLHL32  
GTGTGTGTGTGTGTGTGTGTGTGTGTGTGTGT

>hsamiR574\_5p  
TGAGTGTGTGTGTGTGAGTGTGT  
>hAT-N53\_DR  
GTGTGAGTGTGTGTGTGTGAGTGTGTGT  
>KLHL32  
GTGTGTGTGTGTGTGTGTGTGTGTGTGTGTGT

>hsamiR574\_5p  
TGAGTGTGTGTGTGTGAGTGTGT  
>hAT-N53\_DR  
GTGTGAGTGTGTGTGTGTGAGTGTGTGT  
>KLHL32  
GTGTGTGTGTGTGTGTGTGTGTGTGTGTGTGT

>hsamiR574\_5p  
TGAGTGTGTGTGTGTGAGTGTGT  
>hAT-N53\_DR  
GTGTGAGTGTGTGTGTGTGAGTGTGTG  
>KLHL32  
GTGTGTGTGTGTGTGTGTGTGTGTGTGTG

>hsamiR574\_5p  
TGAGTGTGTGTGTGTGAGTGTGT  
>hAT-N53\_DR  
AGTGTGTGTGTGTGAGTGTGTGT  
>KLHL32  
AGTGTGTGTGTGTGTGTGTGTGTGTGTGTGTGT

>hsamiR574\_5p  
TGAGTGTGTGTGTGTGAGTGTGT  
>hAT-N53\_DR  
AGTGTGTGTGTGTGAGTGTGTGT  
>KLHL32  
AGTGTGTGTGTGTGTGTGTGTGTGTGTGTGTGT

>hsamiR574\_5p  
TGAGTGTGTGTGTGTGAGTGTGT  
>hAT-N53\_DR  
AGTGTGTGTGTGTGAGTGTGTGT  
>KLHL32  
AGTGTGTGTGTGTGTGTGTGTGTGTGTGTGTGT

>hsamiR574\_5p  
TGAGTGTGTGTGTGAGTGTGT  
>hAT-N53\_DR  
AGTGTGTGTGTGTGAGTGTGTGT  
>KLHL32  
AGTGTGTGTGTGTGTGTGTGTGTGTGT

>hsamiR574\_5p  
TGAGTGTGTGTGTGAGTGTGT  
>hAT-N53\_DR  
AGTGTGTGTGTGTGAGTGTGTGT  
>KLHL32  
AGTGTGTGTGTGTGTGTGTGTGTGTGT

>hsamiR574\_5p  
TGAGTGTGTGTGTGAGTGTGT  
>hAT-N53\_DR  
AGTGTGTGTGTGTGAGTGTGTGT  
>KLHL32  
AGTGTGTGTGTGTGTGTGTGTGTGTGT

>hsamiR574\_5p  
TGAGTGTGTGTGTGAGTGTGT  
>hAT-N53\_DR  
GTGTGAGTGTGTGTGTGAGTGTGTGT  
>KLHL32  
GTGTGTGTGTGTGTGTGTGTGTGTGTGTG





>hsamiR574\_5p  
TGAGTGTGTGTGTGAGTGTGT  
>hAT-N53\_DR  
GTGTGTGTGTGTGAGTGTGTGT  
>APOD  
GTGTGTGTGTGTGTGTGTGTGTG

>hsamiR574\_5p  
TGAGTGTGTGTGTGTGAGTGTGT  
>hAT-N53\_DR  
GTGTGTGTGTGTGAGTGTGTGT  
>APOD  
GTGTGTGTGTGTGTGTGTGTGTG

>hsamiR574\_5p  
TGAGTGTGTGTGTGTGAGTGTGT  
>hAT-N53\_DR  
GTGTGAGTGTGTGTGTGTGAGTGTGTGT  
>APOD  
GTGTGTGTGTGTGTGTGTGGGTATGTGT

>hsamiR574\_5p  
TGAGTGTGTGTGTGTGAGTGTGT  
>hAT-N53\_DR  
GTGTGAGTGTGTGTGTGTGAGTGTGTGT  
>PCDHB16  
GTGTGTGTGTGTGTGTGTGTGTGTGTGT

>hsamiR574\_5p  
TGAGTGTGTGTGTGTGAGTGTGT  
>hAT-N53\_DR  
GTGTGAGTGTGTGTGTGTGAGTGTGTGT  
>PCDHB16  
GTGTGTGTGTGTGTGTGTGTGTGTGTGTGTGTGTGTGTGTGTGTGT

>hsamiR574\_5p  
TGAGTGTGTGTGTGTGAGTGTGT  
>hAT-N53\_DR  
TGTGAGTGTGTGTGTGTGAGTGTGTGT  
>PCDHB16  
TGTGTGTGTGTGTGTGTGTGTGTGTGTGTGTGTGTGTGTGTGTGTGT

>hsamiR574\_5p  
TGAGTGTGTGTGTGTGAGTGTGT  
>hAT-N53\_DR  
GTGTGAGTGTGTGTGTGTGAGTGTGTGT  
>RD3  
GTGTGTGTGTGTGTGTGTGTGTGTGTGTGT

>hsamiR574\_5p  
TGAGTGTGTGTGTGTGAGTGTGT  
>hAT-N53\_DR  
GTGTGAGTGTGTGTGTGTGAGTGTGTGT  
>RD3  
GTGTGTGTGTGTGTGTGTGTGTGTGTGTGTGTGTGTGTGTGTGTGTGT

>hsamiR574\_5p  
TGAGTGTGTGTGTGTGAGTGTGT  
>hAT-N53\_DR  
GTGTGAGTGTGTGTGTGTGAGTGTGTGT  
>RD3  
GTGTGTGTGTGTGTGTGTGTGTGTGTGTGTGTGTGTGTGTGTGTGTGT

>hsamiR574\_5p  
TGAGTGTGTGTGTGTGAGTGTGT  
>hAT-N53\_DR  
AGTGTGTGTGTGTGAGTG  
>AC015804.1  
AGTGTGTGTGTGTGAGTG

>hsamiR574\_5p  
TGAGTGTGTGTGTGTGAGTGTGT  
>hAT-N53\_DR  
GCGTGTGAGTGTGTGTGTGTG  
>SPINK13  
GCGTGTGGGTGTGTGTGTGTGT

>hsamiR574\_5p  
TGAGTGTGTGTGTGTGAGTGTGT  
>hAT-N53\_DR  
GCGTGTGAGTGTGTGTGTGTG  
>SPINK13  
GCGTGTGGGTGTGTGTGTGTGTGTG

>hsamiR574\_5p  
TGAGTGTGTGTGTGTGAGTGTGT  
>hAT-N53\_DR  
GCGTGTGAGTGTGTGTGTGTG  
>SPINK13  
GCGTGTGGGTGTGTGTGTGTGTGT

>hsamiR574\_5p  
TGAGTGTGTGTGTGTGAGTGTGT  
>hAT-N53\_DR  
GCGTGTGAGTGTGTGTGTGTG  
>SPINK13  
GCGTGTGGGTGTGTGTGTGTGTG

>hsamiR574\_5p  
TGAGTGTGTGTGTGAGTGTGT  
>hAT-N53\_DR  
GCGTGTGAGTGTGTGTGTGTG  
>SPINK13  
GCGTGTGGGTGTGTGTGTGTG

>hsamiR574\_5p  
TGAGTGTGTGTGTGAGTGTGT  
>hAT-N53\_DR  
GTGTGTGTGTGAGTGTGTGT  
>C9orf38  
GTGTGTGTGTGTGTGTGTGT

>hsamiR574\_5p  
TGAGTGTGTGTGTGAGTGTGT  
>hAT-N53\_DR  
GTGTGTGTGTGTGAGTGTGT  
>C9orf38  
GTGTGTGTGTGTGTGTGTGT

>hsamiR574\_5p  
TGAGTGTGTGTGTGAGTGTGT  
>hAT-N53\_DR  
AGTGTGTGTGTGTGAGTGTGT  
>OR1C1  
AGTGTGTGTGTGTGTGTGTGT

>hsamiR574\_5p  
TGAGTGTGTGTGTGAGTGTGT  
>hAT-N53\_DR  
GTGTGAGTGTGTGTGTGTGAGTGTGT  
>OR1C1  
GTGTGTGTGTGTGTGTGTGTGTGT

>hsamiR574\_5p  
TGAGTGTGTGTGTGAGTGTGT  
>hAT-N53\_DR  
GTGTGAGTGTGTGTGTGTGAGTGTGT  
>OR1C1  
GTGTGTGTGTGTGTGTGTGTGTGT

>hsamiR574\_5p  
TGAGTGTGTGTGTGAGTGTGT  
>hAT-N53\_DR  
GTGTGAGTGTGTGTGTGTGAGTGTGT  
>OR1C1  
GTGTGTGTGTGTGTGTGTGTGTG

>hsamiR574\_5p  
TGAGTGTGTGTGTGAGTGTGT  
>hAT-N53\_DR  
AGTGTGTGTGTGTGAGTGTGTGT  
>OR1C1  
AGTGTGTGTGTGTGTGTGTGTGTGTGTGTGT

>hsamiR574\_5p  
TGAGTGTGTGTGTGTGAGTGTGT  
>hAT-N53\_DR  
GTGTGAGTGTGTGTGTGTGAGTGTGTGT  
>OR1C1  
GTGTGTGTGTGTGTGTGTGTGTGTGTGTGTG

>hsamiR574\_5p  
TGAGTGTGTGTGTGTGAGTGTGT  
>hAT-N53\_DR  
GTGTGAGTGTGTGTGTGTGAGTGTGTGT  
>OR1C1  
GTGTGTGTGTGTGTGTGTGTGTGTGTGTGTG

>hsamiR574\_5p  
TGAGTGTGTGTGTGTGAGTGTGT  
>hAT-N53\_DR  
AGTGTGTGTGTGTGAGTGTGTGT  
>OR1C1  
AGTGTGTGTGTGTGTGTGTGTGTGTGTGTGTG

>hsamiR574\_5p  
TGAGTGTGTGTGTGTGAGTGTGT  
>hAT-N53\_DR  
GTGTGTGTGTGTGAGTGTGTG  
>CSPG4P5  
T

>hsamiR574\_5p  
TGAGTGTGTGTGTGTGAGTGTGT  
>hAT-N53\_DR  
TGTGTGTGTGTGAGTGTGTGT  
>CSPG4P5  
T

>hsamiR582\_5p  
TTACAGTTGTTCAACCAGTTACT  
>L3  
ACAGTTGTTCAACC  
>SMAD1  
ACAGTTGTTCAACC

>hsamiR582\_5p  
TTACAGTTGTTCAACCAGTTACT  
>L3  
ACAGTTGTTCAACC  
>SMAD1  
ACAGTTGTTCAACCGCGAAC

>hsamiR582\_5p  
TTACAGTTGTTCAACCAGTTACT  
>L3  
ACAGTTGTTCAACC  
>SMAD1  
ACAGTTGTTCAACCGCGAACTCACGAA

>hsamiR584\_5p  
TTATGGTTTGCCTGGGACTGAG  
>MER81  
TTGCCTGGGACTGAGG  
>TRAF1  
TTGCCTGGGACTGAGG

>hsamiR548b\_5p  
AAAAGTAATTGTGGTTTTGGCC  
>MADE1  
AAAAGTAATTGTGGTTTTGGC  
>CASP6  
AAAAGTTATTGTGGTTTTGGC



>hsamiR616\_5p  
ACTCAAACCCCTTCAGTGA  
>L2  
AAAACCCCTTCAGTGA  
>C12orf24  
AAAAATCTTCAGTGA

>hsamiR625\_5p  
AGGGGGAAAGTTCTATAG  
>L1MC1\_EC  
AGGGGGAAAGTTCT  
>TNFAIP8  
AGGGGGAAAGTTCT

>hsamiR638  
AGGGATCGCGGGCGGGTGGCGGCCT  
>ENSPM1\_ZM  
CGCGGGCGGGTGGCGGCCTAGGGCGCGG  
>HDAC4  
CGCGGGCGGGTGGCGGGCTCGGGCTCGG

>hsamiR644a  
AGTGTGGCTTTCTTAGAGC  
>L1MB3\_EC  
CTTATAGTGTGGCTTTCTTA  
>RPS6KA2  
CTTTAGGGTGGCTTTCTTA

>hsamiR652\_5p  
CAACCCTAGGAGAGGGTGCCATTCA  
>MER91C  
AGGAGAGGGTGCCA  
>TUBGCP6  
AGGAGAGGGTGCCA

>hsamiR652\_5p  
CAACCCTAGGAGAGGGTGCCATTCA  
>MER91C  
AGGAGAGGGTGCCATTC  
>TUBGCP6  
AGGAGAGGGTGCCACTC

>hsamiR421  
ATCAACAGACATTAATTGGGCGC  
>MIR2\_Repetitive\_sequence\_Mammalia  
TCAACAGACATTAATTGGGCGCCTGCTCTGT  
>RAD1  
TCAACAGACATTGAATGTGCCATGCACTGT

>hsamiR421  
ATCAACAGACATTAATTGGGCGC  
>MIR2\_Repetitive\_sequence\_Mammalia  
TCATCAACAGACATTAA  
>FAM35B  
TCAGCAACAGACATTAA

>hsamir1224\_5p  
GTGAGGACTCGGGAGGTGG  
>LTR9\_OG\_ERV3\_Otolemur\_garnettii  
ACTCGGGAGGTGGAGG  
>RDH13  
ACTCGGGAGGTGGAGG

>hsamir1224\_5p  
GTGAGGACTCGGGAGGTGG  
>LTR9\_OG\_ERV3\_Otolemur\_garnettii  
CTCGGGAGGTGGAGGG  
>MYL6B  
CTCGGGAGGTGGAGGG

>hsamir1224\_3p  
CCCCACCTCCTCTCCTCAG  
>LTR9\_OG\_ERV3\_Otolemur\_garnettii  
CCTCCTCTCCTCAG  
>TCEAL3  
CCTCCTCTCCTCAG

>hsamir1224\_3p  
CCCCACCTCCTCTCCTCAG  
>LTR9\_OG\_ERV3\_Otolemur\_garnettii  
CCTCCTCTCCTCAG  
>EGFL6  
CCTCCTCTCCTCAG

>hsamir1224\_3p  
CCCCACCTCCTCTCCTCAG  
>LTR9\_OG\_ERV3\_Otolemur\_garnettii  
CCTCCTCTCCTCAG  
>TCEAL6  
CCTCCTCTCCTCAG

>hsamiR1271\_3p  
AGTGCCTGCTATGTGCCAGGCA  
>L2B  
GAGTGCCTGCTATGTGCCAGG  
>FAM20A  
GAGTACCTGCTATGTGCCAGG

>hsamiR762  
GGGGCTGGGGCCGGGGCCGAGC  
>NonLTR\_5\_CR\_Non\_LTR\_Retrotransposon\_Chlamydomonas\_reinhardtii  
GGCTGGGGCCGGGGCC  
>ITGA3  
GGCTGGGGCCGGGGCC

>hsamiR762  
GGGGCTGGGGCCGGGGCCGAGC  
>NonLTR\_5\_CR\_Non\_LTR\_Retrotransposon\_Chlamydomonas\_reinhardtii  
GGCTGGGGCCGGGGCC  
>IFRD1  
GGCTGGGGCCGGGGCC

>hsamiR762  
GGGGCTGGGGCCGGGGCCGAGC  
>NonLTR\_5\_CR\_Non\_LTR\_Retrotransposon\_Chlamydomonas\_reinhardtii  
CGGGGCTGGGGCCGGGGCCG  
>CHRD  
CGGGGCCGGGGCCGGGGCCG

>hsamiR762  
GGGGCTGGGGCCGGGGCCGAGC  
>NonLTR\_5\_CR\_Non\_LTR\_Retrotransposon\_Chlamydomonas\_reinhardtii  
CGGGGCTGGGGCCGGGGCCG  
>CHRD  
CGGGGCCGGGGCCGGGGCCGGGGC

>hsamiR762  
GGGGCTGGGGCCGGGGCCGAGC  
>NonLTR\_5\_CR\_Non\_LTR\_Retrotransposon\_Chlamydomonas\_reinhardtii  
GCTGGCGGGGCTGGGGCCGGGGCCGAGCCCGCGGCGGGGCCCTCCCGTCCGGCGGGGCTCAGGCTCCGCGCC  
AGGCCCGGGCGCCGCGCTCTCGGCCTGCCGTCCCCCTGGAGTTGGCCGCGCCCTCTCTCGTCCCCAACGCCTCCG  
CAAGTCCCCGCCCCGTTTCTGCCGCCGCGCCCCGCCCCGGCCTGTCCCCGGAGCGGCCCGGTGGCGCGGGCGGC  
CAGAGCCCAGGCCTGGAAGCCCGGCCGGCCCCGCCCGACCCGGGCCCGCCCCCTTGAGCGCCTGG  
>BCL7C  
GCTGGCGGGGCTGGGGCCGGGGCCGAGCCCGCGGCGGGGCCCTCCCGTCCGGCGGGGCTCAGGCTCCGCGCC  
AGGCCCGGGCGCCGCGCTCTCGGCCTGCCGTCCCCCTGGAGTTGGCCGCGCCCTCTCTCGTCCCCAACGCCTCCG  
CAAGTCCCCGCCCCGTTTCTGCCGCCGCGCCCCGCCCCGGCCTGTCCCCGGAGCGGCCCGGTGGCGCGGGCGGC  
CAGAGCCCAGGCCTGGAAGCCCGGCCGGCCCCGCCCGACCCGGGCCCGCCCCCTTGAGCGCCTGG

>hsamiR762  
GGGGCTGGGGCCGGGGCCGAGC  
>NonLTR\_5\_CR\_Non\_LTR\_Retrotransposon\_Chlamydomonas\_reinhardtii  
GCTGGCGGGGCTGGGGCCGGGGCCGAGCCCGCGGCGGGGCCCTCCCGTCCGGCGGGGCTCAGGCTCCGCGCC  
AGGCCCGGGCGCCGCGCTCTCGGCCTGCCGTCCCCCTGGAGTTGGCCGCGCCCTCTCTCGTCCCCAACGCCTCCG  
CAAGTCCCCGCCCCGTTTCTGCCGCCGCGCCCCGCCCCGGCCTGTCCCCGGAGCGGCCCGGTGGCGCGGGCGGC  
CAGAG

>BCL7C  
GCGGCCCGGTGGCGCGGGCGGCCAGAGCCCAGGCCTGGAAGCCCGGCCGCCCGCCCCGACCCGGGCCCGCC  
CCCTTGGAGCGCCTGGACGCTCAGCGCCCCCTGCCCGCCCGAGAGCGGGAGTTGGGGACGGACGCGCGAGTT  
GGGGACGGAGAGCGGGAGTTGCGACCGGACGCGCGAGGCAGGGCCGAGGCCGTGTGTTTCAGACCACGTGGGC  
GCGGGGTGCG

>hsamiR762  
GGGGCTGGGGCCGGGGCCGAGC  
>NonLTR\_5\_CR\_Non\_LTR\_Retrotransposon\_Chlamydomonas\_reinhardtii  
GCGGGGCTGGGGCCGGGGCC  
>HRH3  
GCGGGGCCGGGGCCGGGGCC

>hsamiR762  
GGGGCTGGGGCCGGGGCCGAGC  
>NonLTR\_5\_CR\_Non\_LTR\_Retrotransposon\_Chlamydomonas\_reinhardtii  
GCGGGGCTGGGGCCGGGGCC  
>HRH3  
GCGGGGCCGGGGCCGGGGCCAGAGCAGGCGGT

>hsamiR762  
GGGGCTGGGGCCGGGGCCGAGC  
>NonLTR\_5\_CR\_Non\_LTR\_Retrotransposon\_Chlamydomonas\_reinhardtii  
GCGGGGCTGGGGCCGGGGCC  
>HRH3  
GCGGGGCCGGGGCCGGGGCCAGAGCAG

>hsamiR762  
GGGGCTGGGGCCGGGGCCGAGC  
>NonLTR\_5\_CR\_Non\_LTR\_Retrotransposon\_Chlamydomonas\_reinhardtii  
GCCGGGGCCGAGCCCGCGGC  
>SHD  
GCCGGGGCCGAGCCCGCGGC

>hsamiR762  
GGGGCTGGGGCCGGGGCCGAGC  
>NonLTR\_5\_CR\_Non\_LTR\_Retrotransposon\_Chlamydomonas\_reinhardtii  
GGGCTGGGGCCGGGGC  
>FBXW4  
GGGCTGGGGCCGGGGC

>hsamiR762  
GGGGCTGGGGCCGGGGCCGAGC  
>NonLTR\_5\_CR\_Non\_LTR\_Retrotransposon\_Chlamydomonas\_reinhardtii  
GGGGCTGGGGCCGGGGCCGAGCCCGCGGC  
>FADS1  
GGGGCGGGGGCCGGGGCCGAGCCGGCGGC



>hsamiR762  
GGGGCTGGGGCCGGGGCCGAGC  
>NonLTR\_5\_CR\_Non\_LTR\_Retrotransposon\_Chlamydomonas\_reinhardtii  
GCTGGCGGGGCTGGGGCCGGGGCCGAGC  
>CSMD1  
GCTGGCGGGGCCGGGGCCGGGGACGAGC

>hsamiR935  
CCAGTTACCGCTTCCGCTACCGC  
>MERMITE18C  
CCGCTTCCGCTACCGCC  
>CARM1  
CCGCTGCCGCTACCGCC

>hsamiR935  
CCAGTTACCGCTTCCGCTACCGC  
>MERMITE18C  
CCGCCGCCGCTCCCGCT  
>CARM1  
CCGCCGCCGCTGCCGCTACCGC

>hsamiR935  
CCAGTTACCGCTTCCGCTACCGC  
>MERMITE18C  
CCGCTTCCGCTACCGGCCGCCGCTCCCGCT  
>CARM1  
CCGCCGCCGCCGCCGCCGCCGCTGCCGCTACCGC

>hsamiR1227  
CGTGCCACCCTTTTCCCCAG  
>NonLTR\_5\_CR\_Non\_LTR\_Retrotransposon\_Chlamydomonas\_reinhardtii  
CCCTTTTCCCCAGC  
>CS  
CCCTTTTCCCCAGC

>hsamiR1227  
CGTGCCACCCTTTTCCCCAG  
>NonLTR\_5\_CR\_Non\_LTR\_Retrotransposon\_Chlamydomonas\_reinhardtii  
CCCTTTTCCCCAGC  
>ZNF140  
CCCTTTTCCCCAGC

>hsamiR1227  
CGTGCCACCCTTTTCCCCAG  
>NonLTR\_5\_CR\_Non\_LTR\_Retrotransposon\_Chlamydomonas\_reinhardtii  
CCCTTTTCCCCAGCT  
>S1PR3  
CCCTTTTCCCCAGCT

>hsamiR1202  
GTGCCAGCTGCAGTGGGGGAG  
>MER52A  
CTGCAGTGGGGGAG  
>GNPDA1  
CTGCAGTGGGGGAG

>hsamiR1202  
GTGCCAGCTGCAGTGGGGGAG  
>MER52A  
TGCCAGCTGCAGTGG  
>GPAM  
TGCCAGCTGCAGTGG

>hsamiR1202  
GTGCCAGCTGCAGTGGGGGAG  
>MER52A  
TGCCAGCTGCAGTGG  
>GPAM  
TGCCAGCTGCAGTGGCGCA

>hsamiR1202  
GTGCCAGCTGCAGTGGGGGAG  
>MER52A  
CAGCTGCAGTGGGGGAGGC  
>SCRN1  
CAGCTGCAGTGGCGGAGGC

>hsamiR1202  
GTGCCAGCTGCAGTGGGGGAG  
>MER52A  
GGTGCCAGCTGCAG  
>GPR155  
GGTGCCAGCTGCAG

>hsamiR1202  
GTGCCAGCTGCAGTGGGGGAG  
>MER52A  
GGTGCCAGCTGCAG  
>GAPVD1  
GGTGCCAGCTGCAG

>hsamiR1285\_5p  
GATCTCACTTTGTTGCCAGG  
>AluJ  
TTGTTGCCAGGCTGG  
>FRMPD1  
TTGTTGCCAGGCTGG

>hsamiR1285\_5p  
GATCTCACTTTGTTGCCCAGG  
>AluJ  
CAGGCTGGAGTGCAGCGGCACCATCATAGCTCAGTGCAGCTGCAAACCTCCTAGGCTCAGGCAGTCCTCCTGCCTC  
AGCCTCCAAGTAGTTGGGACTACAGGCATATGCCACCACACCCAGCTAATTTTTTTATTATTTGTAGAGATAGGAT  
CTCACTTTGTTGCCCAGGCT  
>AACS  
CAGGCTGGAGTGCCGTGGCACAATCAGAGCTCACTGCAGCCTCGACCTCCTAACCTCAAGTAATCCTCCTGCCTCA  
GCCTCCCATGTAGCTGGGACCACAGATGTGAGCCACCACGCCCAGCTAATTTTTTTATTATTTTGTAGATGAGGTCTC  
ACTTTGTTGTCCAGGCT

>hsamiR1285\_5p  
GATCTCACTTTGTTGCCCAGG  
>AluJ  
TCACTCTTTTGCCCAGGCTGGAGTGCAGCGGCACCATCATAGCTCAGTGCAGCTGCAAACCTCCTAGGCTCAGGCAG  
TCCTCCTGCCTCAGCCTCCAAGTAGTTGGGACTACAGGCATATGCCACCACACCCAGCTAATTTT  
>AACS  
TCACTCTTGTGTTGCCCAGGCTGGAGTGCAATGGCACGATCTCAGCTCACTGCAACTTCCACCTCCCAGGTTCAAGTG  
ATTCTCCTGCCTCAGCCTCCCTAGTAGCTGGGATTACAGGCATGTGCCACCATGCCCAGCTAATTTT

>hsamiR1285\_5p  
GATCTCACTTTGTTGCCCAGG  
>AluJ  
TTGTTGCCCAGGCTGG  
>AACS  
TTGTTGCCCAGGCTGG

>hsamiR1285\_5p  
GATCTCACTTTGTTGCCCAGG  
>AluJ  
TCTCACTTTGTTGCCCAGGCTGGTCTCAAACCTCCTGGTCT  
>OSGEP  
TCTCACTATGTTGCCCAGCCTGGTCTCAAACCTCCTGGTCT

>hsamiR1285\_3p  
TCTGGGCAACAAAGTGAGACCT  
>AluJ  
CTGGGCAACAAAGTGAGAC  
>SH3BP5  
CTGGGCAACAAAGTGAGAC

>hsamiR1285\_5p  
GATCTCACTTTGTTGCCCAGG  
>AluJ  
GTCTCACTCTTTTGCCCAGGCTGGAGTGCAG  
>NUMB  
GTCTCACTGTGTTGCCCAGGCTGGAGTGCAG



>hsamiR1285\_5p  
GATCTCACTTTGTTGCCCAGG  
>AluJ  
TCTCACTTTGTTGCCCAGGCTGG  
>NUMB  
TCTCACTGTGTTGCCCAGGCTGG

>hsamiR1285\_5p  
GATCTCACTTTGTTGCCCAGG  
>AluJ  
TTTGTTGCCCAGGCTGG  
>C9orf100  
TTTGTTGCCCAGGCTGG

>hsamiR1285\_5p  
GATCTCACTTTGTTGCCCAGG  
>AluJ  
TTGTTGCCCAGGCTGG  
>NLRP12  
TTGTTGCCCAGGCTGG

>hsamiR1285\_5p  
GATCTCACTTTGTTGCCCAGG  
>AluJ  
GATCTCACTTTGTTGCCCAGGCTGG  
>FADS1  
GATCTCACTCTGTTGCCCAGGCTGG

>hsamiR1285\_5p  
GATCTCACTTTGTTGCCCAGG  
>AluJ  
TTGTTGCCCAGGCTGG  
>ZBTB43  
TTGTTGCCCAGGCTGG

>hsamiR1285\_5p  
GATCTCACTTTGTTGCCCAGG  
>AluJ  
TTTTTTTTTTTTTTCCTTGGGACACAGTCTCACTCTTTTGGCCAGGCTGGAG  
>POLE  
TTTTTTTTTTTTTTTTTGAGACAGAATCTCACTCTGTTGTCCAGGCTGGAG

>hsamiR1285\_5p  
GATCTCACTTTGTTGCCCAGG  
>AluJ  
GTCTCACTCTTTTGGCCAGGCTGGAGTGCAGCGGCACCATCATAGCTCAGTGCAGCTGCAAACCTCCTAGGCTCAGG  
CAGTCCTCCTGCCTCAGCCTCCAAGTAGTTGGGACTACAGGCATATGCCACCACACCCAGCTAATTTTTTTATTATT  
TG TAGAGATAGGATCTCACTTTGTTGCCCAGGCTGGTCTCAAACCTCCTGG

>ANXA2

T

>hsamiR1285\_5p

GATCTCACTTTGTTGCCCAGG

>AluJ

AGTCTCACTCTTTTGCCCAGGCTGGAGTGCAGCGGCACC

>XPOT

AGTCTCACTCTGTTGCCCAGGCTGGAGTGCAGTGGCACC

>hsamiR1285\_5p

GATCTCACTTTGTTGCCCAGG

>AluJ

TCTCACTTTGTTGCCCAGGCTGG

>XPOT

TCTCACTCTGTTGCCCAGGCTGG

>hsamiR1285\_3p

TCTGGGCAACAAAGTGAGACCT

>AluJ

CTGGGCAACAAAGTGAGA

>BRF1

CTGGGCAACAAAGTGAGA

>hsamiR1285\_5p

GATCTCACTTTGTTGCCCAGG

>AluJ

CTTTGTTGCCCAGGCTGGTCTCAAACCTCTGG

>C16orf85

CTTTGTTGCCCAGGCTGGTCTCAAACCTCTGG

>hsamiR1285\_3p

TCTGGGCAACAAAGTGAGACCT

>AluJb

GGCCGGGCATGGTGGCTCATGCCTGTAATCCCAGCACTTTGGGAGGCCGAGGCAGGCGGATGACCTGAGGTCAG

GAATTCGAGACCAGCCTGGCCAATATGGTGAAACCCCATCTCTACTAAAAATACAAAAATTGGCCGGGTGTGGTG

GCAGGCGCTTGTAAATCCCAGCAACTCAGGAGGCTGAGGCAGGAGAATTGCTTGAACCCGGGAGGTGGAGGTTGC

AGTG

>ZMYND10

GGCCGGGCGCGGTGGCTGACACCTGTAATCTCAGCACTTTGGGAGGCCGAGGCAGGCGGATCACTTGAGGTCAG

GAGTTTGAGACCAGCCTGGGCAACATGGTGAAACCCTGTCTCTACTAAAAGTACAAAAATTAGACAGGTGTGGTA

GCACACACCTGTAGTCCCAGCTACATGGGAGACTGAGGCAGGAGAATCGCTTGAGCACAGGAGGTGGAGTTTGC

AGTGAGGCAAGATTGCACCACCGCACTCCAGCCTGGACAACAAAGGGAGACC

>hsamiR1285\_3p

TCTGGGCAACAAAGTGAGACCT

>AluJb

GGGCGCAGTGGCTCACACCTGTAATTCAGCAATTTGGGAGGCCGAGGCTGGTGCATCACTTGAGCCCAGCAATT  
TGAGACCAATCTGGGCAACAAAGTGAGACCTCCGTCTCTACAAAGAATACAAAAATTAG

>ZMYND10

GGGCGCGGTGGCTGACACCTGTAATCTCAGCACTTTGGGAGGCCGAGGCAGGCGGATCACTTGAGGTCAGGAGT  
TTGAGACCAGCCTGGGCAACATGGTGAAACCCTGTCTCTACTAAAAGTACAAAAATTAGACAGGTGTGGTAGCAC  
ACACCTGTAGTCCCAGCTACATGGGAGACTGAGGCAGGAGAATCGCTTGAGCACAGGAGGTGGAGTTTGCAGTG  
AGGCAAGATTGCACCACCGCACTCCAGCCTGGACAACAAAGGGAGACC

>hsamiR1285\_3p

TCTGGGCAACAAAGTGAGACCT

>AluJb

GGGCGCAGTGGCTCACACCTGTAATTCAGCAATTTGGGAGGCCGAGGCTGGTGCATCACTTGAGCCCAGCAATT  
TGAGACCAATCTGGGCAACAAAGTGAGACCTC

>NUCB2

GGGCGCAGCTGCTCAGGCCTGTAATCTAACACTTTGGGAGGCCGAGGCAGGAGGATTGCTTGAGCCCAGGAGT  
TTGAGACCAGCCTGGACAACAAAGTGAGGCCTC

>hsamiR1285\_3p

TCTGGGCAACAAAGTGAGACCT

>AluJb

GCTCATGCCTGTAATCCCAGCACTTTGGGAGGCCGAGGCAGGCGGATGACCTGAGGTCAGGAATTCGAGACCAG  
CCTGG

>NUCB2

GCTCAGGCCTGTAATCTAACACTTTGGGAGGCCGAGGCAGGAGGATTGCTTGAGCCCAGGAGTTTGAGACCAGC  
CTGGACAACAAAGTGAG

>hsamiR1285\_3p

TCTGGGCAACAAAGTGAGACCT

>AluJb

CTGTAATCCCAGCACTTTGGGAGGCCGAGGCAGGCGGATGACCTGAGGTCAGGAATTCGAGACCAGCCTGGCCA  
ATATGGTGAAACCCCATCTCTACTAAAAA

>CAPS

GCAACATAGTGAGACCCCCCATCTCTACAAAAACTACAAAAAATTAGCCAGGCATGGTGGTGTTCCTGTAATC  
CCACCTACTTGGAAGGCTGAGGCAGGAGGATCACTTGAGCCCGGGAGTTGGAGGCTGCAGTGAGCTATGATCGC  
ACCACTGCACTCCAGCCTGGGTTACAGAGCAAGACGCCCGCCTCTTAAAAATAAGTAAATAAACTGGCCGGGCAC  
GGTGGCTCACGCCTGTAATCCCAGCACTTTGGGAGGCCGAGGCAGGCGGATCATGAGGTCAGCAGTTGAGACC  
AGCCTGGCCAACATGGTGAAACCCTGTCTCTACTATAAAATACAAAAATTAGTCAGCCGGGTGCGGTGGCTCATGCC  
TGTAATCACAGCACTTTGGGAGGCCGAGGCAGACAGATCACCTGAGGTCAGGAGTTTGAGACCAGCCTGGCCAA  
CATGGTGAAACCCTGTCTCTACTTAAATAACGAAAACTAGCTGGGCGTGGTGGTATGTGCCTGTAATCCCAGCTA  
CTCGGGAGGCTGAGGCAGGAGAATTGCATGAACCTGGGAAGCGGAGGTTGAGTGAGCCGAGATCGTGCCATT  
GCACTCCAGACTGGGGGACAAGAGCAAGACTTTGTCTCAAAAAAAAAAAGAAAATTAGCCAGGTATGGTGGC  
GGGTGCCTGTAATCCCACCTACTCCAGAGGCTGAGGCAGGAGAATCACTTGAACCCAGGAGGCAGAGTTGAG  
TGAACCAAGACCATGCCACTGCACCACAGCCTGGGCGACAGAGTGAGACTCTGTCTCAAAAATAAATAAACT  
AAAAAAGAGGCCAGGGCTGGGCGCGGTGGCTCACAGCTGTAATCCCAGCACTTTGGGAGGCTGAGGTGGGCG  
GATCACTTGAGGTCAGGAGTTCAAGACCAGCCTGGCCAACATTTTGAACCCCATCTCTACTAAAAA

>hsamiR1285\_3p

TCTGGGCAACAAAGTGAGACCT

>AluJb

GCGCAGTGGCTCACACCTGTAATCCAGCATTGTTGGGAGGCCGAGGCTGGTGCATCACTTGAGCCCAGCAATTTG  
AGACCAATCTGGGCAACAAAGTGAGACC

>CAPS

GCGCGTGGCTCATGCCTGTAATCCCAACACTTTGGGAAGCCAGGGCAGGAAGATCACTTGAGCCCAGGAGTTTG  
AGACCCGCTGTGCAACATAGTGAGACC

>hsamiR1285\_3p

TCTGGGCAACAAAGTGAGACCT

>AluJb

GGTGGCTCATGCCTGTAATCCCAGCACTTTGGGAGGCCGAGGCAGGCCGATGACCTGAGGTCAGGAATTCGAGA  
CCAGCCTGGCCAATATGGTGAAACCCCATCTCTACTAAAAATACAAAAATTGGCCGGGTGTGGTGGCAGGCGCTT  
GTAATCCCAGCAACTCAGGAGGCTGAGGCAGGAGAATTGCTTGAACCCGGGAGGTGGAGTTGCAGTG

>CAPS

GGTGGCTCATGCCTGTAATCCCAACACTTTGGGAAGCCAGGGCAGGAAGATCACTTGAGCCCAGGAGTTTGAGAC  
CCGCCTGTGCAACATAGTGAGACCCCCCATCTCTACAAAAACTACAAAAATTAGCCAGGCATGGTGGTGTGTTT  
CTGTAATCCCACCTACTTGGGAAGGCTGAGGCAGGAGGATCACTTGAGCCCGGGAGTTGGAGGCTGCAGTG

>hsamiR1285\_3p

TCTGGGCAACAAAGTGAGACCT

>AluJb

TGGGCCGGGCATGGTGGCTCATGCCTGTAATCCCAGCACTTTGGGAGGCCGAGGCAGGCCGATGACCTGAGGTC  
AGGAATTCGAGACCAGCCTGGCCAATATGGTGAAACCCCATCTCTACTAAAAATACAAAAATTGGCCGGGTGTGG  
TGGCAGGCGCTTGTAAATCCCAGCAACTCAGGAGGCTGAGGCAGGAGAATTGCTTGAACCCGGGAGGTGGAGGTT  
GCAGTG

>ADCK3

CTGGGCAACAAGAGTGAGACGCCATCATGACACAGGTGCTCAAGAGCGAAGATGGCCAGGCATGGTGGCACATG  
CCTGTAATCCCAGCTACTCGAGAGGCTGAGACTGGAGAATTGCTGGAACCTCAGGAGGTGGAAGTTGCAGTGAAC  
CAAGATTGCACCACACATTTCTCCAAGAAGATATATACGAATGGTCTGTAGTCCCAGAACTTTGGGAGGCCAAGG  
TGGGAGGATTACTTCAGGCCAGGAGTTCAAATCTAGCCTGGGCAATACAGCAAGACCCCGTCTCTGACACCTGTCT  
GCAGGCATGCCCGCTCCATCCTGCAGTGTGCCATCTGGAGTCGGGTGCTCTCTTGGAGTCGCCACGCACAGATG  
CCTCTGGCCAGCTCCACTCTGCCATTTGTTTTGCCAACACAGCCCTCTGGGTCTGTCTTGTGGTTCTGGAAACCTCT  
GCCTCTAGCATCTCAGGAACAGAACTCTCAGGACAGGCCCATCTTCTCCTTTACCACCTAAGTTTCTCTGCTTCA  
ATCACCTGGTGGGATTGGCCTGCGAGAGAGCAAGTTCTATTAACAGTAGAGAGCTCAGGAACCCATCCACCCA  
CTTATGGAAACTTGGTATATGTCAGGAGAGTTCTACAGACCAGCGAGAAAGGAGAGACTGTTGAGTAAACAGTGC  
TGGGACACCTGGTTACAAAGAAAAACAAAATTAGGTCCCTACTAAATACAATCATAAAAAATACATTTGAGTGAAC  
TAAAAATCTTATTATGAAAATAAAAATTTAGAAAACCTTGAGGGTAGGGAAGGATCTCTTAAAAACAAGATTCAATG  
GCATAAGCCATACAAGCAAAAAACTGATAGATTTAATAACATTAACATTTAAAAATTACTTGGGTCCAGCAAAAACA  
CTCCTAAAGGCAGGGAAGAGAGGCAAGCCACAATGTACCAGACATTTGCAATGCATATAATTAATCAAAGATTAG  
CATCTCTCCAGAATATATATTTTAAGAGGCTTAAATATCCGTAAGACAAAAAATCCAAGTAAAAAATGGGCAGAGG  
ATATGAACAAGTAACAGAGAAGGAACTTGGGCTGGGCGCAGTGACTCACACCTGTAATCCCAGCACTTTGGGAG  
GCCGAGGCCGGTGGATCACGAGGTCAGGAGATCGAGACCCCTCTGGCTAACACGGTGAACCCCATCTCTACTCA  
AAATACAAAAAACTAGCCGGGCGTGATGGCAGGCACCTGTAATCCCAGCTACTCAGGAGGCTGAGGCAGGAGA

ATGGCATGAACCCGGGAGGCGGAGCTTGCAGTGAGCCAAGATCACGCTGCTGCACTCCAGCCTGGGCGACAGCG  
CGAGACTCTGTCTAAAAAATTAATAATAATGAACAGAGAAGGAACCTTGTACAGCCAATACACATATGAAAAGA  
TAATTATAAAACCTAAAGGAAATGACACCCATCCAATCAGACAAGATGAAAAGTCTGATGACACCAAGTATTATAG  
AGTTGGGGAATCTCAGATTGCGGATGGAAGGATAAACAGACACATACTTGGAGGGTAATTGGGAATGTCCAGT  
CAATTGGGGGAATTCCAATACTTCTCAAATCCACACAATGTGATGGGATGCTCACTGCAGCACAGCTGTAATACA  
GAAACTGCAAAACCCCTACAGGTCGATCAATAGCATATAAACAGTAGAACTCATACAATGGAACACTATACAAT  
AGTTAAAATAACTGGGCTGGGCACGGTGGCTCACGCTGTAATCCCAGCACTTTTGGAGGCCAAGGTGCGTGGAT  
CACCTGCAGTCAGGAGTTTGAGACCAGCCTGGCTAACGTGGTGAAACCCCGTCTCTACTAAAATACAAAATTAGCC  
AGGCATGGTGGCGGGCAACTGTAATCCCAGCTACTCAGGAAATTGAGACAGGAGAATTGCTTGAACCCAGGAGG  
CAGAGGTTGCAGTG

>hsamiR1285\_3p

TCTGGGCAACAAAGTGAGACCT

>AluJb

GGGCCGGGCATGGTGGCTCATGCCTGTAATCCCAGCACTTTGGGAGGCCGAGGCAGGCCGATGACCTGAGGTCA  
GGAATTCGAGACCAGCCTGGCCAATATGGTGAAACCCATCTCTACTAAAATACAAAATTGGCCGGGTGTGGT  
GGCAGGCGCTTGTAAATCCCAGCAACTCAGGAGGCTGAGGCAGGAGAATTGCTTGAACCCGGGAGGTGGAGGTTG  
CA

>MRPL48

TGGGCAACAGAGTGAGATCCTGTTTTCAAACAGAAAAGGAGGGAGACTTATTAAGTAAATTATGCAGCTGTAAAA  
AGAAATAAGGGGCCGGCGCGGTGGCTCACGTCTGTAATCCCAGCACTTTGGGAGGCCGAGGCAGGTGGATGAT  
GAGGTCAGGAGTTCGAGACCAGCCTAGCCAATATGGTGAAACCCGTCTCTACTAAAATATGAAAATTAGCTGG  
GCACGGTGGTGTGCGCCTGTAGTCCCAGCTGCTTGGGAGGCTGAGGCAGGAGAATTGCTTGAACCCGGGAGGCC  
GAGGTTGCA

>hsamiR1285\_3p

TCTGGGCAACAAAGTGAGACCT

>AluJb

CAGTGGCTCACACCTGTAATCCAGCATTTTGGGAGGCCGAGGCTGGTGCATCACTTGAGCCAGCAATTTGAGAC  
CAATCTGGGCAACAAAGTGAGACCTCCGTCTCTACAAAGAATACAAAATTAGCTGGGCGTGG

>BRF1

CAGTGGCTCACGCTGTATCCCAGCACTTTGGGAGGCAGAGGTGGGAGGATAGCTTGAGCCAGGAGTTTCGAG  
ACCAGCCTGGGCAACAAAGTGAGATCCCTGTCTCTACAAAAATTTAAAAATTAGCTGTGCGTGG

>hsamiR1285\_3p

TCTGGGCAACAAAGTGAGACCT

>AluJb

GTGGCTCATGCCTGTAATCCCAGCACTTTGGGAGGCCGAGGCAGGCCGATGACCTGAGGTCAGGAATTCGAGAC  
CAGCCTGG

>BRF1

GTGGCTCACGCTGTATCCCAGCACTTTGGGAGGCAGAGGTGGGAGGATAGCTTGAGCCAGGAGTTTCGAGAC  
CAGCCTGGGCAACAAAGTGAGA

>hsamiR1285\_3p

TCTGGGCAACAAAGTGAGACCT

>AluJb

GTGGCTCATGCCTGTAATCCCAGCACTTTGGGAGGCCGAGGCAGGCGGATGACCTGAGGTCAGGAATTCGAGAC  
CAGCCTGGCCAATATGGTCAAACCCCATCTCTACTAAAAATACAAAAATTGGCCGGGTGTGGTGGCAGGCGCTTG  
TAATCCCAGCAACTCAGGAGGCTGAGGCAGGAGAATTGCTTGAACCCGGGAGGTGGAGGTTGC

>PRR19

GTGGCCCATACCTATAATCCTAGTACTTTGGGAGGCCAAGGCAGGCAGATTACCTGAGGTCAGGAGTTCGAGACC  
AGCCTGGCCAACATAGTCAAACCCCATCTCTACTAAAAATACAAAAATTAGCCAGACGTGGTGGCATGCACCTGTA  
ATTCCAGCTACTCAAGAGGCTGAGGCAGGAGAATCACTTGAACCCAGGAGGTGGAGGTTGCGGTGAGCTGAGAT  
CATGCCATTGCACTCCAGCCTGGGCAACAGAGCAAGACTCCATCTCAAAAAAAAAAAAAAAAAATTAGCTGGGCATGGT  
GGTGACGCTGTAATCCCAGCTACTCAGGAGGCTGAGGCAGGAGAATTGCTTGAACCCAGAAGGCAGAAGTTG  
CAGTGAGTCACGATTGTCCACTGCACTTCAGTCTGGGCAATAGAGTGAGAC

>hsamiR1285\_3p

TCTGGGCAACAAAGTGAGACCT

>AluJb

CCAGCCTGGCCAATATGGTCAAACCCCATCTCT

>ZKSCAN5

CCAGCCTGGGCAACATAGTGAGACCCCATCTCT

>hsamiR1289

TGGAGTCCAGGAATCTGCATTTT

>MER5A

GTGGAGTCCAGGAATCTGCATTTT

>ZBED5

GTGGAAGCCATGAATCTGCATTTT

>hsamiR1289

TGGAGTCCAGGAATCTGCATTTT

>MER5A

GGTGTGGAGTCCAGGAATCTGCATTTT

>ZBED5

GGAGTGAAGCCATGAATCTGCATTTT

>hsamiR548k

AAAAGTACTTGCGGATTTTGCT

>MADE1

ACTTGCGGATTTTGCTTTAC

>NBL1

ACTTGGGGATTTTGCTTTAC

>hsamiR1299

TTCTGGAATTCTGTGTGAGGGA

>CER

TTCTGGAATTCTGT

>CALCR

TTCTGGAATTCTGT

>hsamiR1299

TTCTGGAATTCTGTGTGAGGGA

>CER  
GTTCTGGAATTCTG  
>SLC35B1  
GTTCTGGAATTCTG

>hsamiR1299  
TTCTGGAATTCTGTGTGAGGGA  
>CER  
GTTCTGGAATTCTGTGT  
>SLC35B1  
GTTCTGGAATTCTGGGT

>hsamiR1303  
TTTAGAGACGGGGTCTTGCTCT  
>PB1D11  
AGAGACGGGGTCTTGCTCTGTTGCCAGGCT  
>AACS  
AGAGACAGGGTCTTGCTATGTTGCCAGGCT

>hsamiR1303  
TTTAGAGACGGGGTCTTGCTCT  
>PB1D11  
GAGACGGGGTCTTGCTCTGTTGCC  
>ZBTB43  
GAGATGGGGTCTTGCTCTGTTGCC

>hsamiR1304\_5p  
TTTGAGGCTACAGTGAGATGTG  
>ALU\_SINE1\_7SL\_Primates  
CTTGAGCCCAGCGGTTTGAGGCTACAGTGAGATGTGATCCTGCCAC  
>WHSC1  
CTTGAGCCCAGGAGTTGGAGGCTACAGTGAGCTATGATCGTGCCAC

>hsamiR1304\_3p  
TCTCACTGTAGCCTCGAACCCC  
>ALU\_SINE1\_7SL\_Primates  
CTCACTGTAGCCTCGAACCCCTGGGCTCAAG  
>IFT81  
CTCACTGTAGCCTCAAACCTCCTAGGCTCAAG

>hsamiR1246  
AATGGATTTTTGGAGCAGG  
>MLT1M  
TTTTGGAGCAGGAGTGG  
>ABI3BP  
TTTTGGAGCAGGTGTGG

>hsamiR1249

ACGCCCTTCCCCCCTTCTTCA

>L2B\_CR1\_Eutheria

CTTCCCCCCTTCTTCAC

>CDC42BPA

CTTCTCCCCCCTTCTTCAC

>hsamiR1249

ACGCCCTTCCCCCCTTCTTCA

>L2B\_CR1\_Eutheria

TTCCCCCCTTCTTCACCT

>TMEM132C

TTCACCCCTTCTTCACCT

>hsamiR1254

AGCCTGGAAGCTGGAGCCTGCAGT

>AluJr

CCTGTAGTCCCAGCTACTTGGGAAGCTGAGGTGGGAGGATTGCTTGAGCCTGGAAGCTGGAGCCTGCAGT

>AACS

CCTGTGGTCTAGCTACTCAGGAGGCTGAGGTGGGAGGATCACTTGAGCCTGGGAGGTGGAGGCTGCAGT

>hsamiR1254

AGCCTGGAAGCTGGAGCCTGCAGT

>AluJr

GTCCTAGCTACTCAGGAGCCTGAGGTGGGAGGATCACTTGA

>AACS

GTCCTAGCTACTCAGGAGGCTGAGGTGGGAGGATCACTTGAGCCTGGGAGGTGGAGGCTGCAGT

>hsamiR1254

AGCCTGGAAGCTGGAGCCTGCAGT

>AluJr

CCTGTAGTCCCAGCTACTTGGGAAGCTGAGGTGGGAGGATTGCTTGAGCCTGGAAGCTGGAGCCTGCAGTGA

>MEI1

CCTGTAGTCCCAGCTACTTGGGAGGCTGAGGCAGGAGAATGGCGTGAACCCAGAAGGCCGGAGCCTGCAGTGA

>hsamiR1254

AGCCTGGAAGCTGGAGCCTGCAGT

>AluJr

TTGGGCATAGTGGCACACGCCTGTAGTCCCAGCTACTTGGGAAGCTGAGGTGGGAGGATTGCTTGAGCCTGGAA

GCTGGAGCCTGCAGT

>AC138035.1

TTGGGCATAGTGGCAAGCACCTGTAGTCTCAGCCACGTGGGAGGTTGAGGTGGGAGGATCGCTTCAGCCTGGAA

GGTTGAGGCTGCAGT

>hsamiR1254

AGCCTGGAAGCTGGAGCCTGCAGT

>AluJr

TGAGGTGGGAGGATCACTTGAACCTTGAAGGT

>AC138035.1



TGAGGTGGGAGGATCGCTTCAGCCTGGAAGGTTGAGGCTGCAGT

>hsamiR1255a

AGGATGAGCAAAGAAAGTAGATT

>TIGGER1

GAGTTGCTTCTCAAGGATGAGCAAAGAAA

>ZBTB38

GAGTTGCTTCTTATGGATGAGCAAAGAAA

>hsamiR1256

AGGCATTGACTTCTCACTAGCT

>TIGGER1

TTTCAATAGATGGCTGTTTCATCTACACTGAAAATCATGTGTTTAGTGTAGGCACTTTTATCAGTTTTCTTGGCTGGA

TCTTCTGGATAAAGTGAAGCAGTTTCTCCATAAGTACTTGCTGCTTACCTTGCACCTTTCATGTTATGGAGACAGCTG

CTTTCACCTAAACCTCATGAGCTAACTTTGCTAGCTTCAACTTTTCTTCTGTAGCTTTCTTACCTCTCAGCCTTAC

>SCAF11

AGGCATTGACTTCTCCTCTCTACTTATGAAAGTCCTGGATGGCATCTACTTTCAATAGAAGGCTGGCTCATCTGCAT

TAAAAATCTTTTGTAGTATAGCCACTTTCATCAATGATGTTAGCTAGGTCTTCTGGATAACCTGATGCAGCTTCCG

CATCACCAGCTGCTGCTTCGCCTTGCACCTTTATGTTATGGAGATGGCTTCTTTCCTTAACTTCATGAACCAACCTC

TGCTAGCTTCAAACCTTTTCTTCTGCAGCTTCTTATCCCTCTCAGACTTAC

>hsamiR1256

AGGCATTGACTTCTCACTAGCT

>TIGGER1

AGTCACCAGCTACATTAGCCCCTAACAGTAGAGTCAGCCTGTTGAAGCTTTGAAGCTTTGATGCCAGGCATTGACT

TCTC

>SCAF11

AGTCACCAGCTGCATTAGCCCCTAACAGACAGTCAGCCTGTCCTTGAAGCTTTGAAGCCAGGCATTGACTTCTC

>hsamiR1256

AGGCATTGACTTCTCACTAGCT

>TIGGER1

AGGCATTGACTTCTCAC

>SLC38A9

AGGCATTGACTTCTCAC

>hsamiR548m

CAAAGGTATTTGTGGTTTTTG

>MADE1

ATTTGTGGTTTTTGTTCATTAAAGTAATGCA

>PPP6R2

ATTTGTGGTTTTTCTTGGAGTATATGCA

>hsamiR548m

CAAAGGTATTTGTGGTTTTTG

>MADE1

ATTTGTGGTTTTTGTTCATTAAAGTAATGCA

>PPP6R2

ATTTGTGGTTTTTTCTTGGAGTATATGCAGC

>hsamiR548m

CAAAGGTATTTGTGGTTTTTG

>MADE1

ATTTGTGGTTTTGTCATTAAAGTAATGCA

>PPP6R2

ATTTGTGGTTTTTTCTTGGAGTATATGCAGCTTAAAGAA

>hsamiR548m

CAAAGGTATTTGTGGTTTTTG

>MADE1

ATTTGTGGTTTTTG

>ZC3H14

ATTTGTGGTTTTTG

>hsamiR548m

CAAAGGTATTTGTGGTTTTTG

>MADE1

CAAAGGTATTTGTGGTTTTT

>FAM63A

CAAAGGAAGTTTGTGGTTTTT

>hsamiR1268a

CGGGCGTGGTGGTGGGGG

>AluYc2\_Repetitive\_sequence\_Homo\_sapiens

CGGTGGCTCACGCCCTGTAATTCCAGCACTTTGGGAGGCTGAGGTGGGTGGATCACCTGAGGTCAGGAGTTCGAAA  
CCAGCCTGGCCAACAT

>CAPS

GGGCGTGGTGGTATGTGCCTGTAATCCCAGCTACTCGGGAGGCTGAGGCAGGAGAATTGCATGAACCTGGGAAG  
CGGAGGTTGCAGTGAGCCGAGATCGTGCCATTGCACTCCAGACTGGGGGACAAGAGCAAGACTTTGTCTCAAAA  
AAAAAAAAAGAAAATTAGCCAGGTATGGTGGCGGGTGCCTGTAATCCCACCTACTCCAGAGGCTGAGGCAGGAG  
AATCACTTGAACCCAGGAGGCAGAGGTTGCAGTGAACCAAGACCATGCCACTGCACCACAGCCTGGGCGACAGA  
GTGAGACTCTGTCTCAAAAATAAATAAATACTTAAAAAAGAGGCCAGGGCTGGGCGCGGTGGCTCACAGCTGT  
AATCCCAGCACTTTGGGAGGCTGAGGTGGGCGGATCACTTGAAGTTCAGGAGTTCAAGACCAGCCTGGCCAACAT

>hsamiR1268a

CGGGCGTGGTGGTGGGGG

>AluYc2\_Repetitive\_sequence\_Homo\_sapiens

TAGCCGGGCGTGGTGGTGGGGCCTGTGGTCCCAGCTACTTTGGAGGCTGAGG

>CAPS

TAGCTGGGCGTGGTGGTATGTGCCTGTAATCCCAGCTACTCGGGAGGCTGAGG

>hsamiR1268a

CGGGCGTGGTGGTGGGGG

>AluYc2\_Repetitive\_sequence\_Homo\_sapiens

TTGGGAGGCTGAGGTGGGAGGAT

>CAPS



CAGGCGGGTGGCTCACGCCTGTAATCCCAGCACTTTAGGAGGCCGAGGCAGGCGGATCACAAGGTCAGGAGTT  
CCAGACCAGCCTGGCCAATATGGTCAAACCCTGTCTCTACTAAAAATACAAAATTAGCCGGGCGTGGTGGTGGG

>hsamiR1268a

CGGGCGTGGTGGTGGGGG

>AluYc2\_Repetitive\_sequence\_Homo\_sapiens

AAAAGTTAGCCGGGCGTGGTGGTGGGGGCCTGTGGTCCCAGCTACTTTGGAGGCTGAGG

>NR4A1

AAAATTAGCCGGGCGTGGTGGTGGTGCCTGTAGTCCCAGCTACTCTGGAGGCTGAGG

>hsamiR1268a

CGGGCGTGGTGGTGGGGG

>AluYc2\_Repetitive\_sequence\_Homo\_sapiens

TAAAAAAGAAAAATTAGTCCAGCGTGGTGGTGGGTGCCTGTGGTCCCAGCTACTTGGGAGGCTGAGG

>NR4A1

TAAAATACAAAATTAGCCGGGCGTGGTGGTGGGTGCCTGTAGTCCCAGCTACTCTGGAGGCTGAGG

>hsamiR1268a

CGGGCGTGGTGGTGGGGG

>AluYc2\_Repetitive\_sequence\_Homo\_sapiens

CGTGGTGGTGGGTGCCTGTGGTCCCAGCTACTTGGGAGGCTGAGG

>GPR172B

CGTGGTGGTGGGTGCCAGTAATCCCAGCTACTCAGGAGGCTGAGG

>hsamiR1268a

CGGGCGTGGTGGTGGGGG

>AluYc2\_Repetitive\_sequence\_Homo\_sapiens

AAAAGTTAGCCGGGCGTGGTGGTGGGGGCCTGTGGTCCCAGCTACTTTGGAGGCTGAGGTGGAAGGATCACCTG

AGCCAGGAGGTGGAGGCTGCAGTAAGCTTAGATTGCAGCACTGCGGTCCAGCCTGGGTGACAGA

>GPR172B

AAAATTAGCTGGTCGTGGTGGTGGGTGCCAGTAATCCCAGCTACTCAGGAGGCTGAGGCAGGAGATTCACTTGA

ACCCGGAAGGTGGAGGTTGCAGTGAGCCAAGATCACACCACTGCATTCCAGCCTGGGCGACAGA

>hsamiR1268a

CGGGCGTGGTGGTGGGGG

>AluYc2\_Repetitive\_sequence\_Homo\_sapiens

GGTGGCTCACGCCTGTAATTCCAGCACTTTGGGAGGCTGAGGTGGTGGATCACCTGAGGTCAGGAGTTCAAAC

CAGCCTGGCCAACATGGAGAAACACCGACTCTACTAA

>FADS2

GGTGGCTCACACCTGTAATTCCAGCACTTTGGGAGACAGAAGCGGGTGGATCACTTGAGGTCAGGAGTTGAGAC

CAGCCTGGGCAACATGGTCAAACCCGCTCTACTAAAAATACAAAATTAGCCGGGCGTGGTGGTGGG

>hsamiR1268a

CGGGCGTGGTGGTGGGGG

>AluYc2\_Repetitive\_sequence\_Homo\_sapiens

AAAAGTTAGCCGGGCGTGGTGGTGGGGGCCTGTGGTCCCAGCTACTTTGGAGGCTGAGG

>FADS2

AAAATTAGCCGGGCGTGGTGGTGGGCGCCTGTAATCCCAGCTACTCGGGAGGCTGAGG

>hsamiR1268a  
CGGGCGTGGTGGTGGGG  
>AluYc2\_Repetitive\_sequence\_Homo\_sapiens  
TAAAAAAGAAAAATTAGTCCAGCGTGGTGGTGGTGCCTGTGGTCCCAGCTACTTGGGAGGCTGAGG  
>FADS2  
TAAAATACAAAAATTAGCCGGGCGTGGTTGTGGGCGCCTGTAATCCCAGCTACTCGGGAGGCTGAGG

>hsamiR1268a  
CGGGCGTGGTGGTGGGG  
>AluYc2\_Repetitive\_sequence\_Homo\_sapiens  
CAGGAGTTTGACACCAGCATGGGCAACATGGTG  
>FADS2  
CAGGAGTTTGAGACCAGCCTGGGCAACATGGTGAAACCCCGCCTCTACTAAAAATACAAAAATTAGCCGGGCGTG  
GTTGTGGG

>hsamiR1268a  
CGGGCGTGGTGGTGGGG  
>AluYc2\_Repetitive\_sequence\_Homo\_sapiens  
CAGGAGTTTGACACTAGCATGGGCAACATGGT  
>FADS2  
CAGGAGTTTGAGACCAGCCTGGGCAACATGGTGAAACCCCGCCTCTACTAAAAATACAAAAATTAGCCGGGCGTG  
GTTGTGGG

>hsamiR1268a  
CGGGCGTGGTGGTGGGG  
>AluYc2\_Repetitive\_sequence\_Homo\_sapiens  
CCAGCACTTTGGGAGGCTGAGGTGGTGGATCACCTGAGGTCAGGAGTTTCGAAACCAGCCTGGCCAACATGGAG  
AAACACCGACTCTACTAAA  
>TMEM180  
CCAGCACTTTGGGAGGCCGAGGCAGGTGGATCACCTGAGGTCAGGAGTTTGAGACCAGCCTGGCCAACATGGCG  
AAACCCCGTCTCTACTAAAAATACAAAAATTAGCCGGGCGTGGTGG

>hsamiR1268a  
CGGGCGTGGTGGTGGGG  
>AluYc2\_Repetitive\_sequence\_Homo\_sapiens  
AAAAGTTAGCCGGGCGTGGTGG  
>TMEM180  
AAAAATTAGCCGGGCGTGGTGG

>hsamiR1268a  
CGGGCGTGGTGGTGGGG  
>AluYc2\_Repetitive\_sequence\_Homo\_sapiens  
AAAAGTTAGCCGGGCGTGGTGGTGGGGCCTGTGGTCCCAGC  
>FRRS1  
AAAAATTAGCCGGGCGTGGTGGCGGGCGCCTGTAATCCCAGC

>hsamiR1268a  
CGGGCGTGGTGGTGGGG

>AluYc2\_Repetitive\_sequence\_Homo\_sapiens

TAGCCGGGCGTGGTGG

>CTSB

TAGCCGGGCGTGGTGG

>hsamiR1268a

CGGGCGTGGTGGTGGGGG

>AluYc2\_Repetitive\_sequence\_Homo\_sapiens

AAAAGTTAGCCGGGCGTGGTGGTGGGGGCCTGTGGTCCCAGCTACTTTGGAGGCTGAG

>ZNF3

AAAAATTACCCGGGCGTGGTGGCAGACGCCTGTAATCCCAGCTACTCTGGAGGCTGAG

>hsamiR1268a

CGGGCGTGGTGGTGGGGG

>AluYc2\_Repetitive\_sequence\_Homo\_sapiens

AAAAGTTAGCCGGGCGTGGTGGTGGGGGCCTGTGGTCCCAGCTACTTTGGAGGCTGAGG

>HARS

AAAAATTAGCCGGGCGTGGTGGCAGGTGCCTGTAGTCCCAGCTACTTGGGAGGCTGAGG

>hsamiR1268a

CGGGCGTGGTGGTGGGGG

>AluYc2\_Repetitive\_sequence\_Homo\_sapiens

AAAAATTAGTCCAGCGTGGTGGTGGGTGCCTGTGGTCCCAGCTACTTGGGAGGCTGAGG

>HARS

AAAAATTAGCCGGGCGTGGTGGCAGGTGCCTGTAGTCCCAGCTACTTGGGAGGCTGAGG

>hsamiR1268a

CGGGCGTGGTGGTGGGGG

>AluYc2\_Repetitive\_sequence\_Homo\_sapiens

TTAGCCGGGCGTGGTGGTGGGGGCCTGTGGTCCCAGCTACTTTGGAGGCTGAGG

>DLK2

TTAGCCAGGCGTGGTGGTGC GCGCCTGTAATCCCAGCTACTCGGAAGGCTGAGG

>hsamiR1268a

CGGGCGTGGTGGTGGGGG

>AluYc2\_Repetitive\_sequence\_Homo\_sapiens

TTAGCCGGGCGTGGTGGTGGG

>AMIGO3

TTAGCCGGGCGTGGTGGTGGG

>hsamiR1268a

CGGGCGTGGTGGTGGGGG

>AluYc2\_Repetitive\_sequence\_Homo\_sapiens

GGTGGCTCACGCCTGTAATTCCAGCACTTTGGGAGGCTGAGGTGGTGGATCACCTGAGGTCAGGAGTTCGAAAC

CAGCCTGGCCAACATGGAGAAACACCGACTCTACTAAA

>RUFY1

GGGCGTGGTGGTGGGCGCCTGTAGTCCCAGCTACTTGGGAGGCTGAGGCAGGAGAATGGCGTGAACCCGGGAG

GCAGAGCTTGCAGTGAGCCAAGATCGTGCCATTGCACTCCAGCCTGGGCGACAGGGCAAGACTCCATCCCCCAC

CAAAAAAAAAAAAAAAAAAGAAGAATGAGAATAAGTCAATAGATATTTGAAAAGTTAAGTTCATAGGCTGGGTGT  
GGTGGCTCATGCCTGTAATCCCAGCACTTTGGAAGGCCAAGGCCGGGAGATCACTTGAGGTCAGGAGTTTGACACC  
AGCCTGGCCAACATGGTGAAACCCTGTCTCTACTAAA

>hsamiR1268a  
CGGGCGTGGTGGTGGGGG  
>AluYc2\_Repetitive\_sequence\_Homo\_sapiens  
TTAGCCGGGCGTGGTGGTGGGGCCTGTGGTCCCAGCTACTTTGGAGGCTGAGG  
>RUFY1  
TTAGCTGGGCGTGGTGGTGGGCGCCTGTAGTCCCAGCTACTTGGGAGGCTGAGG

>hsamiR1268a  
CGGGCGTGGTGGTGGGGG  
>AluYc2\_Repetitive\_sequence\_Homo\_sapiens  
TAAAAAAGAAAAATTAGTCCAGCGTGGTGGTGGGTGCCTGTGGTCCCAGCTACTTGGGAGGCTGAGG  
>ANKLE2  
TAAAAATACAAAAATTAGCCGGGCGTGGTGGTACATGCCTGTAACCCAGCTACTCGGGAGGCTGAGG

>hsamiR1268a  
CGGGCGTGGTGGTGGGGG  
>AluYc2\_Repetitive\_sequence\_Homo\_sapiens  
AAAAGTTAGCCGGGCGTGGTGGT  
>ANKLE2  
AAAAATTAGCCGGGCGTGGTGGT

>hsamiR1268a  
CGGGCGTGGTGGTGGGGG  
>AluYc2\_Repetitive\_sequence\_Homo\_sapiens  
AAAAGTTAGCCGGGCGTGGTGGTGGGGCCTGTGGTCCCAGCTACTTTGGAGGCTGA  
>ANKLE2  
AAAAATTAGCCGGGCGTGGTGGCAGGCGCCTGTAATCCCAGCTACTCGGGAGGCTGA

>hsamiR1268a  
CGGGCGTGGTGGTGGGGG  
>AluYc2\_Repetitive\_sequence\_Homo\_sapiens  
TAAAAAAGAAAAATTAGTCCAGCGTGGTGGTGGGTGCCTGTGGTCCCAGCTACTTGGGAGGCTGA  
>ANKLE2  
TAAAAATACAAAAATTAGCCGGGCGTGGTGGCAGGCGCCTGTAATCCCAGCTACTCGGGAGGCTGA

>hsamiR1268a  
CGGGCGTGGTGGTGGGGG  
>AluYc2\_Repetitive\_sequence\_Homo\_sapiens  
AAAAGTTAGCCGGGCGTGGTGGTGGGGCCTGTGGTCCCAGCTACTTTGGAGGCTGAGGTGGAAGGATCACCTG  
AGCCCAGGAGGTGGAGGCTGCAGTAAGCTTAGATTGCAGCACTGCGGTCCAGCCTGGGTGACAGAGTGAGACCC  
CATCTCAA  
>AGAP10

AAAAATTAGCCGGGCGTGGTGGCAGGCGCCTGTAATCCCAGCTACTCGGGAGGCTGAGGCAGGAGAATCCCTTG  
AACCCGGGAGGCAGAGGTTGCAGTGAGCCAAGACTGTGCCACAGCACTCCAGCCTGGGTGACAGAGTGAGACTC  
CCTCTCAA

>hsamiR1268a

CGGGCGTGGTGGTGGGG

>AluYc2\_Repetitive\_sequence\_Homo\_sapiens

AAAAATTAGTCCAGCGTGGTGGTGGGTGCCTGTGGTCCCAGCTACTTGGGAGGCTGAGG

>AGAP10

AAAAATTAGCCGGGCGTGGTGGCAGGCGCCTGTAATCCCAGCTACTCGGGAGGCTGAGG

>hsamiR1269a

CTGGACTGAGCCGTGCTACTGG

>MLT2B3

CTGGACTGAGCCGTGCT

>SLC22A12

CTGGCCTGAGCCGTGCT

>hsamiR1272

GATGATGATGGCAGCAAATTCTGAAA

>HERV70\_I\_MER67C\_Homo\_sapiens

TGATGATGGCAGCA

>GTF2H1

TGATGATGGCAGCA

>hsamiR1272

GATGATGATGGCAGCAAATTCTGAAA

>HERV70\_I\_MER67C\_Homo\_sapiens

GATGATGATGGCAGCAA

>ARAP1

GATAATGATGGCAGCAA

>hsamiR1273a

GGGCGACAAAGCAAGACTCTTTCTT

>AluS

TGGCTGGGCTTGGTGGCTCACACCTGTAATCCCAGCACTTTGGAAGGCCAAGGTGGGTGGATCACGAGGTCAGG  
AGTTTCGAGACCAGCCTGGCCAACATAGTGAAACCCATCTCTACTAAAAATACAAAAATTAGCCGGGCGTGGTGGC  
GCTCGCCTATAATCCCAGCTACTCAGCGGGCTGAGGCAGGAGAATTGCTTGAACCCGGGTGGTGGAGTTGCAGT  
GAGCCAAGATTGCGCCACTGCACTCCAGCCTGGGCGACAAAGCAAGACTC

>FAS

TGGCTGGGCGTGGTGGCTCATGCCTGTAATCTCAGCACTTTGGGAGGCTGAGGCAGGTTGGATCACAAGGTCAAG  
AGATTGAGACCATCCTGGCCAACATGGTGAACCCCTGTCTCTACTAAAAATACAAAAATTAAGTGGGCGTGGTGGT  
GTGAGCCTGTAGTCCCAGCTCCTTAGGAGACTGAAGCAGGAGAATAGCATGAACTGGGGAGGCAGAAGTTGCAG  
TGAGCTGAGATCACGCCTCTGCACTCCAGCCTGGGCGACAGAGCAAGACTC

>hsamiR1273a

GGGCGACAAAGCAAGACTCTTTCTT

>AluS



GTGGCTCACACCTGTAATCCCAGCACTTTGGAAGGCCAAGGTGGGTGGATCACGAGGTCAGGAGTTCGAGACCA  
GCCTGGCCAACATAGTCAAACCCATCTCTACTAAAAATACAAAAATTAGCCGGGCGTGGTGGCGCTCGCTATAAT  
CCCAGCTACTCAGCGGGCTGAGGCAGGAGAATTGCTTGAACCCGGGTGGTGGAGGTTGCAGTGAGCCAAGATTG  
CGCCACTGCACTCCAGCCTGGGCGACAAAGCAAGACTCT

>ACACB

GTGGCTCACGCTGTAATCCCAGCACTTTGGGAGGCTGACGCAGGCAAATCACTTGAGGCCAGGAGTTCAAGACC  
AGCCTGGCCAACATGGTCAAACCCGTCTCTACTAAAAACACAAAAATTAGCCAGGTGTGGTGGCACACACCTGTA  
ATTCTGCTACTTGAGAGGCTGAGGCATGAGAATCGCTTGAACCTGGGAGGCAGAGGTTGCAGTGAGCTGAGATT  
GCGCCACTGCACCCAGCCTGGGCAACAGAGCAAGACTCT

>hsamiR1273a

GGGCGACAAAGCAAGACTCTTTCTT

>AluS

GTGGCTCACACCTGTAATCCCAGCACTTTGGAAGGCCAAGGTGGGTGGATCACGAGGTCAGGAGTTCGAGACCA  
GCCTGGCCAACATAGTCAAACCCATCTCTACTAAAAATACAAAAATTAGCCGGGCGTGGTGGCGCTCGCTATAAT  
CCCAGCTACTCAGCGGGCTGAGGCAGGAGAATTGCTTGAACCCGGGTGGTGGAGGTTGCAGTGAGCCAAGATTG  
CGCCACTGCACTCCAGCCTGGGCGACAAAGCAAGACTCT

>AACS

GTGGCTCACACCTGTAATCCCAGCATTTGGGAGGCCAAGGTGGGTGGATCACCTGAGGTCAGGAGCTCGAGACC  
AGCCTGACCAACACGGTCAAATCTCATCTCTACTAAAAATATAGAAAAATTAGCTGGGCGTGGTGGCACATGCCTG  
TGATCCAGCCACTTGGGAGGCTGAGGCACAAGAACTGCTTGAACCCAGAAGGTAGAGGTTGCAGTGAGCTGAG  
ATCGCACCCACTGCACTCCAGCCTGGGTGACAGAGCAAGACTCT

>hsamiR1273a

GGGCGACAAAGCAAGACTCTTTCTT

>AluS

TGGCTGGGCTTGGTGGCTCACACCTGTAATCCCAGCACTTTGGAAGGCCAAGGTGGGTGGATCACGAGGTCAGG  
AGTTCGAGACCAGCCTGGCCAACATAGTCAAACCCATCTCTACTAAAAATACAAAAATTAGCCGGGCGTGGTGGC  
GCTCGCTATAATCCCAGCTACTCAGCGGGCTGAGGCAGGAGAATTGCTTGAACCCGGGTGGTGGAGGTTGCAGT  
GAGCCAAGATTGCGCCACTGCACTCCAGCCTGGGCGACAAAGCAAGA

>AACS

TGGCTGGGCGAGGTGGCTGACGTCTATAATCCTAGCACTTTGGGAGGCCAAGGTGGGCAGATTGCCTGAGCTCA  
GGAGTTCGAGACAAGCCTAGGTGACATGGTGAGACCCCATCTCTACTAAAAATACAAAAAAATTAGCCAGGCGTG  
GTGGCATGTGCCTGTAATCCCAGCTACTCAGGAGGCTGAGGCACAAGAATCGCTTGAACCCAGGAGGCGGAGGT  
TGCAGTGAGCCAAGATTGTGCCACTGCACTCCAGCCTGGGCGACAGAGCAAGA

>hsamiR1273a

GGGCGACAAAGCAAGACTCTTTCTT

>AluS

GGCTGGGCTTGGTGGCTCACACCTGTAATCCCAGCACTTTGGAAGGCCAAGGTGGGTGGATCACGAGGTCAGGA  
GTTTCGAGACCAGCCTGGCCAACATAGTCAAACCCATCTCTACTAAAAATACAAAAATTAGCCGGGCGTGGTGGCG  
CTCGCTATAATCCCAGCTACTCAGCGGGCTGAGGCAGGAGAATTGCTTGAACCCGGGTGGTGGAGGTTGCAGTG  
AGCCAAGATTGCGCCACTGCACTCCAGCCTGGGCGACAAAGCAAGACTCT

>CAPS

GGCTGGGCGCGGTGGCTCATGCCTGTAATCCCAGCACTTTGGGAGGCCGAGGTGGGCAGATCACAAGGTGAGGA  
GTTTGAGACCAGCCTGACCAACATGGTCAAACCCCGCCTCTACTAAAAATACAAAAAAATTAGCCGTGCATGATGGTG

GGCGCCTGTAATCCGAGCTACTTAGGAAGCTGAGGCAGGAGAATCGCTTGAACCCAGGAGGTGGAGCTTGCAGT  
GAGCCAAGATTGCACCACTGCACTCCAGTCTGGGCGACAGAGCAAGACTC

>hsamiR1273a

GGGCGACAAAGCAAGACTCTTTCTT

>AluS

GGCTGGGCTTGGTGGCTCACACCTGTAATCCCAGCACTTTGGAAGGCCAAGGTGGGTGGATCACGAGGTCAGGA  
GTTTCGAGACCAGCCTGGCCAACATAGTGAAACCCATCTCTACTAAAAATACAAAATTAGCCGGGCGTGGTGGCG  
CTCGCCTATAATCCCAGCTACTCAGCGGGCTGAGGCAGGAGAATTGCTTGAACCCGGGTGGTGGAGGTTGCAGTG  
AGCCAAGATTGCGCCACTGCACTCCAGCCTGGG

>CAPS

GGGCGACAGAGCAAGACTCCATCTCAAAAAGAAAAAAAAAAAAAAAAAGCCCCAGGTGGCCAGGTCTGGGGCCC  
TAAGACCTCCCACCCAGGCCACCTCCAAGGGCAGGTCTGCAACCCACAGAGACTGAGCTGAGCCTGAGGGACA  
CCTCTGCTCACTGCCACAAAGCTTGTCACTGGCCGTTGTTAGGAGCCAGTCCCAGGATTTCTGTCTTTACGGATCTT  
TTGTTGTTGGTTTTTCAGGCCTGAAACGTGACTTAGTGGGCTGGCTCTGACAAGGTGGTGGAGCCAGAGGTTGTGA  
CCCCGAGTGGAAAGAGCAGCCCTGATCCTGGACATAAACCTCAAGAGACGAAGCCACCTCACTGAAGGCCTTCAAC  
GGAGACATCGGATATACCTGCCCGCTAAGATAGGTGGGTTTTCCAGGACTTCAAACGTGGGCCCTGTTTGAGGAC  
CCTGTTGCGCCCCGACCAAGGATCATCAATCGGAGCCTTCTCAAGCCTGGCTTACCTCGCTCACAGCACAATT  
ATATTGTCAGAAGTTGCCTTGCTGAGCGCGGTGGCTCATGCCTGTAATCCCAACACTTTGGGAAGCCAGGGCAG  
GAAGATCACTTGAGCCCAGGAGTTTGAGACCCGCTGTGCAACATAGTGAGACCCCCCATCTCTACAAAACTAC  
AAAAAATTAGCCAGGCATGGTGGTGTGTTCTGTAATCCCACCTACTTGGAAAGGCTGAGGCAGGAGGATCACTTG  
AGCCCGGAGTTGGAGGCTGCAGTGAGCTATGATCGCACCACTGCACTCCAGCCTGGGTTACAGAGCAAGACGC  
CCGCCTCTAAAAATAAGTAAATAAACTGGCCGGGCACGGTGGCTCACGCCTGTAATCCCAGCACTTTGGGAGGC  
CGAGGCGGGCAGATCATGAGGTCAGCAGTTCGAGACCAGCCTGGCCAACATGGTCAAACCCTGTCTCTACTATAA  
ATACAAAATTAGTCAGCCGGGTGCGGTGGCTCATGCCTGTAATCACAGCACTTTGGGAGGCCGAGGCAGACAG  
ATCACCTGAGGTCAGGAGTTTGAGACCAGCCTGGCCAACATGGTCAAACCCTGTCTCTACTTAAAAATACGAAAAAC  
TAGCTGGGCGTGGTGGTATGTGCCTGTAATCCCAGCTACTCGGGAGGCTGAGGCAGGAGAATTGCATGAACCTG  
GGAAGCGGAGGTTGCAGTGAGCCGAGATCGTGCCATTGCACTCCAGACTGGGGGACAAGAGCAAGACTTTGTCT  
CAAAAAAAAAAAGAAAATTAGCCAGGTATGGTGGCGGGTGCCTGTAATCCCACCTACTCCAGAGGCTGAGGC  
AGGAGAATCACTTGAACCCAGGAGGCAGAGGTTGCAGTGAACCAAGACCATGCCACTGCACCACAGCCTGGGCG  
ACAGAGTGAGACTCTGTCTCAAAAATAAATAAACTTAAAAAAGAGGCCAGGGCTGGGCGCGGTGGCTCAC  
AGCTGTAATCCCAGCACTTTGGGAGGCTGAGGTGGCGGATCACTTGAGGTCAGGAGTTCAAGACCAGCCTGGC  
CAACATTTTGAACCCCATCTCTACTAAAAAATAAATAGCTGGGCATGGTGGTGCATGCCTGTAATCCCAGCTA  
CTCAGGAGGCCAAGGCAGGAGAATCACTTGAACCCCTGGAGGCAGAGGTTGCAGTGAGCCTAGATCACACCACTG  
TACTTCAGCCTGGG

>hsamiR1273a

GGGCGACAAAGCAAGACTCTTTCTT

>AluS

ACAAAATTAGCCGGGCGTGGTGGCGCTCGCCTATAATCCCAGCTACTCAGCGGGCTGAGGCAGGAGAATTGCTT  
GAACCCGGGTGGTGGAGGTTGCAGTGAGCCAAGATTGCGCCACTGCACTCCAGCCTGGGCGACAAAGCAAGA

>PSMD9

ACAAAATTAGCTGGGCGTGGTGGCGGGTGCCTGTAATCCCAGCTACTTGGGAGGCTGAAGCAGGAGAATTACTT  
GAACCCAGGAGGTGGAGGTTGCAGTGAGCCGAGATCGCACCACTGCCCTCCAGCCTGGCGACAAAGCAAGA

>hsamiR1273a

GGGCGACAAAGCAAGACTCTTTCTT

>AluS

GCTGGGCTTGGTGGCTCACACCTGTAATCCCAGCACTTTGGAAGGCCAAGGTGGGTGGATCACGAGGTCAGGAG  
TTCGAGACCAGCCTGGCCAACATAGTGAAACCCATCTCTACTAAAAA

>PSMD9

GGGCGACAAAGCAAGAATTCGTCTCAAAAAAAAAAAAAAAAAAAGTGCTGCATAAGCCTAGTAATCCTGGAGACATTC  
AGTCCAGGAGAGGGAGTCCACAGGGAGGTGGCCAAAGGGCACCCCTGCTACAGGGCTTTGCCAATTGGCTGGG  
TTTGGGAGGAAGACCCAATGCTACAAAATCTTTGATTTTTCCAGAAAAGCTGAAAATTGGGATCTTTGAAGTGAAA  
TTCTCTGATTTTTAGTACAGATAGCTAATTCAAAATGTTGTGAACCACCATGGCAATCTGCAGGCCACGCCAGCAC  
AGCAGCTGGTATTTTGATACCTTGTGCCTGTCAGTGGGATTGCGGTACTACCTGACCTGCCTCCTCTGCCACTGTCA  
CTTTGGAGCAAAGGCAAGACCCTCAGTCATGAAGGGATTCAAGTTCTCAACCCACAGGAGCAGATGTGGGAAAA  
GAACCCAGATCTGAACAAGTGGAGACATGCACTTGGGAGGCAGACTTACATAATACATGGTCACTTTACTAGAA  
AAGCCCTCCCCAGTGAGGTCCACAGCATCCCTAGACTCTGCAATGCCTGGCACAGGGAAAGTGCTCAATACACAGC  
TGTTGGGGAATGGAACGAACGACTATTTACAACATATTACAATTCTAATCAAAATGTTGAAAGGGTTTTTTTTCAGT  
ACAAAATGTTTCTGCAGTGTATTTCAAAAAACAAATTTGCAATTATAACAAACGTACCATATTAACATAAGCTGTTA  
GCTGGGCGCGGTGGCTCATGCCTGTAATCCCAGCACTTTGCGAGGCCGAGGCGGGCAGATCACCTGAGGTCAGG  
AGTTCGAGACCAGCCTGGCCAACATGGTGAAATCCCGTCTCTACTAAAAA

>hsamiR1273a

GGGCGACAAAGCAAGACTCTTTCTT

>AluS

GGTGGCTCACACCTGTAATCCCAGCACTTTGGAAGGCCAAGGTGGGTGGATCACGAGGTCAGGAGTTCGAGACC  
AGCCTGGCCAACATAGTGAAACCCATCTCTACTAAAAATACAAAATTAGCCGGGCGTGGTGGCGCTCGCCTATAA  
TCCCAGTACTCAGCGGGCTGAGGCAGGAGAATTGCTTGAACCCGGGTGGTGGAGGTTGCAGTGAGCCAAGATT  
GCGCCACTGCACTCCAGCCTGGGCGACAAAGCAAGACTC

>FHL2

GGTGGCTCACGCCTGTAATCCCAGCACTTTGGGAGGCTGAGGCGGGTGAACACGAGGTCAGGAGATTGAGACC  
ATCCTGGCTAACACGGTGAAACCCCATCTCTACTAAAAATACAAAAAAAAAATTATCCGGGTGTGGTGGCGGGCA  
CCTGTAGTCCCAGTACTTGGGAGGCTGGGGCAGGAGAATGGCGTGAACCAAGAGGTAGAGCTTGCAAGTGAAGCT  
GAGATCGTGCCACTGCACTCCAGCCTGGGCGACAAAGCGAGACTC

>hsamiR1273a

GGGCGACAAAGCAAGACTCTTTCTT

>AluS

TGGCTGGGCTTGGTGGCTCACACCTGTAATCCCAGCACTTTGGAAGGCCAAGGTGGGTGGATCACGAGGTCAGG  
AGTTCGAGACCAGCCTGGCCAACATAGTGAAACCCATCTCTACTAAAAATACAAAATTAGCCGGGCGTGGTGGC  
GCTCGCCTATAATCCCAGTACTCAGCGGGCTGAGGCAGGAGAATTGCTTGAACCCGGG

>FADS2

TGGCTGGGCGTGGTGGCTCACACCTGTAATCCAGCACTTTGGGAGACAGAAGCGGGTGGATCACTTGAGGTCAG  
GAGTTTGAGACCAGCCTGGGCAACATGGTGAAACCCCGCCTCTACTAAAAATACAAAATTAGCCGGGCGTGGTT  
GTGGGCGCCTGTAATCCCAGTACTCGGGAGGCTGAGGCAGGAAAATCACTTGAACCCGGGAGGCAGAGATCAC  
ACCACTGCACTCCAGCCTGGGAGACAGAGCAAGACTCT

>hsamiR1273a

GGGCGACAAAGCAAGACTCTTTCTT

>AluS  
CCACTGCACTCCAGCCTGGGCGACAAAGCAAGACTCT  
>FADS2  
CCACTGCACTCCAGCCTGGGAGACAGAGCAAGACTCT

>hsamiR1273a  
GGGCGACAAAGCAAGACTCTTTCTT

>AluS  
GGCTGGGCTTGGTGGCTCACACCTGTAATCCCAGCACTTTGGAAGGCCAAGGTGGGTGGATCACGAGGTCAGGA  
GTTTCGAGACCAGCCTGGCCAACATAGTGAAACCCATCTCTACTAAAAATACAAAAATTAGCCGGGCGTGGTGGCG  
CTCGCCTATAATCCCAGCTACTCAGCGGGCTGAGGCAGGAGAATTGCTTGAACCCGGGTGGTGGAGGTTGCAGTG  
AGCCAAGATTGCGCCACTGCACTCCAGCCTGGGCGACAAAGCAAGACT

>ZNF687  
GGCTGGGCATGGTGGCTCACGCCTGTAATCCCAGCACTTGGGGAGGCAGAGGCGGGCGGATCACGAGGTCAGG  
AGATCAAGACCATCCTGGCCAAGATAGTGAAACCCCGTCTCTACTAAAAATACAAAAATTAGCTGGGCATGGCAG  
CACACACCTGTAGTCCCAGCTACTCGGGAGGCTGAGGCAGAAGAATTGCTTGAACCTGGGAGGTGGAGTTTGCA  
GTGAGCTGAGATCGTCCACTGCACTCCCACCTGGGCGACAGAGCAAGACT

>hsamiR1273a  
GGGCGACAAAGCAAGACTCTTTCTT

>AluS  
GGTGGCTCACACCTGTAATCCCAGCACTTTGGAAGGCCAAGGTGGGTGGATCACGAGGTCAGGAGTTCGAGACC  
AGCCTGGCCAACATAGTGAAACCCATCTCTACTAAAAATACAAAAATTAGCCGGGCGTGGTGGCGCTCGCCTATAA  
TCCCAGCTACTCAGCGGGCTGAGGCAGGAGAATTGCTTGAACCCGGGTGGTGGAGGTTGCAGTGAGCCAAGATT  
GCGCCACTGCACTCCAGCCTGGGCGACAAAGCAAGACTCT

>RGS12  
GGTGGCTCACGCCTATAATCCCAGCGCTTTGGGAGGCCGAGGCAGGTGGACCACGAGGTCAGGAGATCAAGACC  
ATCCTGGCTAACACGGTGAAACCTTGTCTCTACCAAAAAATACAAAAAAATTAGCTGGGCATGGTGGCGGACGCC  
CGTAGTCCCAGCTACTCGGGAGGCTGAGGCAGGAGAATGGCATGAACTCGGGAGGTGGAGCTTGCAGTGAGCC  
GAGATCGTGCCACTGCACTCCAGCCTGGGTGACAAAGCGAGACTCT

>hsamiR1273a  
GGGCGACAAAGCAAGACTCTTTCTT

>AluS  
GGCTGGGCTTGGTGGCTCACACCTGTAATCCCAGCACTTTGGAAGGCCAAGGTGGGTGGATCACGAGGTCAGGA  
GTTTCGAGACCAGCCTGGCCAACATAGTGAAACCCATCTCTACTAAAAATACAAAAATTAGCCGGGCGTGGTGGCG  
CTCGCCTATAATCCCAGCTACTCAGCGGGCTGAGGCAGGAGAATTGCTTGAACCCGGGTGGTGGAGGTTGCAGTG  
AGCCAAGATTGCGCCACTGCACTCCAGCCTGGGCGACAAAGCAAGACTCTTTCTTGGAAAAAACAAAA

>CYBASC3  
GGGCGACAGAGCTAGACTCTGTCTCAAAAACAAAACAAAACAAAAAACCGTGAAAACGCAATGCAAATGCTTG  
AAAATATCCTCTCATTTGTTCTAAGGGCAGGCTGGGCTGTGATCCCAGGGTGTGCTCACTTTGCAGAGCCCCATTCT  
AAGGGAGCAGTCAGCAAGCTCTTCTGTAAAGGTCCAGGTAGTAAATATTCTAGGCTTTGTAGAGCACATGGTCTG  
TCACA ACTATGTCATCAACTCTGCCATGCAAGAGCAGCCACATAAACATCTTAACAAATGAGCACCACGGCTGTG  
TTCCAGTAATATTTATTTATGGACTGAAGTCTGAGTTTCACATAATTTTCAGTCAACAAGATATTATTA ACTTCTT  
GCGAAAAAGGATTCTCCCGGCTGAGCTAAAACAGGTCACATCCAGGGGTAAGAAATGCTAGTTCCCATCCAGCCC  
TTAGTCTTAGAAAAAGGCTCTACGCAGGCTGGGCGCGGTAGCTCACGCCTGTAATCCCAGCACTTTGGGAAGCCG

AGGCGGGCGGATCACATGAGGTCAGGAGTTCGAGACCAGCCTGACCAACATGGAGAAACCCCGTCTCTACTAAA  
AATACAAAAATTAGCCGGGCGCGGTAGCGGGCGCCTGTAATCCCAGCTACTTGGGAGGCTGAGGCAGGGGAATC  
GCTTGAACCCGGGAGGCGGAGGTTGCAGTGAGCCGAGATCGTGCCACTGCATTCCAGCCTGGGCGACAGAGTGA  
GACTCTGTCTCAGAAAAAAAAAAAAA

>hsamiR1273a

GGGCGACAAAGCAAGACTCTTTCTT

>AluS

AGTGAGCCAAGATTGCGCCACTGCACTCCAGCCTGGGCGACAAAGCAAGACTCT

>CYBASC3

AGTGAGCCGAGATCGCACCCTGCACTCTAGCCTGGGCGACAGAGCTAGACTCT

>hsamiR1273a

GGGCGACAAAGCAAGACTCTTTCTT

>AluS

GTGGCTCACACCTGTAATCCCAGCACTTTGGAAGGCCAAGGTGGGTGGATCACGAGGTCAGGAGTTCGAGACCA  
GCCTGGCCAACATAGTGAAACCCATCTCTACTAAAAATACAAAAATTAGCCGGGCGTGGTGGCGCTCGCTATAAT  
CCCAGCTACTCAGCGGGCTGAGGCAGGAGAATTGCTTGAACCCGGGTGGTGGAGGTTGCAGTGAGCCAAGATTG  
CGCCACTGCACTCCAGCCTGGGCGACAAAGCAAGACTC

>NLRP3

GTGGCTCACGCCTGTAATCCCAGCACTTTGAGAGGCCAAGGCAGGCAGATCACCTGAGCTGAGGAATTCAAGACC  
AGCCTGGCCAACATGGCAAACTGTGTCTCTACTAAAAGTACAAAAATGAGCCGGGTGTGGTGGCGGGCGCCTGT  
AATCCCAGCTACTCAGGAAGTTGAGGTAGGAGAATTGATTGAACCCGGGAAGTGGAGGCTGCAGTGAGCCAAGA  
TCACGCCACTGCACTCCAGCCTAGGCGACACAGCAAGACTC

>hsamiR1273a

GGGCGACAAAGCAAGACTCTTTCTT

>AluS

GTGGCTCACACCTGTAATCCCAGCACTTTGGAAGGCCAAGGTGGGTGGATCACGAGGTCAGGAGTTCGAGACCA  
GCCTGGCCAACATAGTGAAACCCATCTCTACTAAAAATACAAAAATTAGCCGGGCGTGGTGGCGCTCGCTATAAT  
CCCAGCTACTCAGCGGGCTGAGGCAGGAGAATTGCTTGAACCCGGGTGGTGGAGGTTGCAGTGAGCCAAGATTG  
CGCCACTGCACTCCAGCCTGGGCGACAAAGCAAGACTC

>NLRP3

GTGGCTCACGCCTGTAATCCCAGCACTTTGAGAGGCCAAGGCAGGCAGATCACCTGAGCTGAGGAATTCAAGACC  
AGCCTGGCCAACATGGCAAACTGTGTCTCTACTAAAAGTACAAAAATGAGCCGGGTGTGGTGGCGGGCGCCTGT  
AATCCCAGCTACTCAGGAAGTTGAGGTAGGAGAATTGATTGAACCCGGGAAGTGGAGGCTGCAGTGAGCCAAGA  
TCACGCCACTGCACTCCAGCCTAGGCGACACAGCAAGACTCCATCTCAAAAAAAAAAAGTTAGCCAAATGCTTAC  
CA

>hsamiR1273a

GGGCGACAAAGCAAGACTCTTTCTT

>AluS

GTGGCTCACACCTGTAATCCCAGCACTTTGGAAGGCCAAGGTGGGTGGATCACGAGGTCAGGAGTTCGAGACCA  
GCCTGGCCAACATAGTGAAACCCATCTCTACTAAAAATACAAAAATTAGCCGGGCGTGGTGGCGCTCGCTATAAT  
CCCAGCTACTCAGCGGGCTGAGGCAGGAGAATTGCTTGAACCCGGGTGGTGGAGGTTGCAGTGAGCCAAGATTG  
CGCCACTGCACTCCAGCCTGGGCGACAAAGCAAGACTC

>NLRP3

GTGGCTCACGCCTGTAATCCCAGCACTTTGAGAGGCCAAGGCAGGCAGATCACCTGAGCTGAGGAATTCAAGACC  
AGCCTGGCCAACATGGCAAACACTGTGTCTCTACTAAAAGTACAAAATGAGCCGGGTGTGGTGGCGGGCGCCTGT  
AATCCCAGCTACTCAGGAAGTTGAGGTAGGAGAATTGATTGAACCCGGGAAGTGGAGGCTGCAGTGAGCCAAGA  
TCACGCCACTGCACTCCAGCCTAGGCGACACAGCAAGACTCCAT

>hsamiR1273a

GGGCGACAAAGCAAGACTCTTTCTT

>AluS

GTGGCTCACACCTGTAATCCCAGCACTTTGGAAGGCCAAGGTGGGTGGATCACGAGGTCAGGAGTTCGAGACCA  
GCCTGGCCAACATAGTGAAACCCATCTCTACTAAAATACAAAATAGCCGGGCGTGGTGGCGCTCGCCTATAAT  
CCCAGCTACTCAGCGGGCTGAGGCAGGAGAATTGCTTGAACCCGGGTGGTGGAGGTTGCAGTGAGCCAAGATTG  
CGCCACTGCACTCCAGCCTGGGCGACAAAGCAAGACTC

>NLRP3

GTGGCTCACGCCTGTAATCCCAGCACTTTGAGAGGCCAAGGCAGGCAGATCACCTGAGCTGAGGAATTCAAGACC  
AGCCTGGCCAACATGGCAAACACTGTGTCTCTACTAAAAGTACAAAATGAGCCGGGTGTGGTGGCGGGCGCCTGT  
AATCCCAGCTACTCAGGAAGTTGAGGTAGGAGAATTGATTGAACCCGGGAAGTGGAGGCTGCAGTGAGCCAAGA  
TCACGCCACTGCACTCCAGCCTAGGCGACACAGCAAGACTCCATCTCAAAAAAAAAAAGTTAGCCAAATGCTTA

>hsamiR1273a

GGGCGACAAAGCAAGACTCTTTCTT

>AluS

GTGGCTCACACCTGTAATCCCAGCACTTTGGAAGGCCAAGGTGGGTGGATCACGAGGTCAGGAGTTCGAGACCA  
GCCTGGCCAACATAGTGAAACCCATCTCTACTAAAATACAAAAA

>CTSB

GTGGCTCACGCCTGTAATCCCAGCACTTTGGGAGGCCGAGGCGGGCGGATCACGAGGTCAGGAGATCAAGATTA  
TCCTGGCTAACACGGTGAAACCCGCTCTAGTAAAAATACAAAAA

>hsamiR1273a

GGGCGACAAAGCAAGACTCTTTCTT

>AluS

GGGCTTGGTGGCTCACACCTGTAATCCCAGCACTTTGGAAGGCCAAGGTGGGTGGATCACGAGGTCAGGAGTTC  
GAGACCAGCCTGGCCAACATAGTGAAACCCATCTCTACTAAAATACAAAATAGCCGGGCGTGGTGGCGCTCG  
CCTATAATCCCAGCTACTCAGCGGGCTGAGGCAGGAGAATTGCTTGAACCCGGGTGGTGGAGGTTGCAGTGAGC  
CAAGATTGCGCCACTGCACTCCAGCCTGGGCGACAAAGCAAGACTCT

>TMEM68

GGGCATGGTGGCTCATGCCTGTAATCCCAGCACTTTGGGAGGCCAAGGCAGGTGGATCACTTGAGGTCAGGAGTT  
CAAGACCAGCCTGGCCAACATGGTGAACCCCATCTCTACTAAAATACAAAATCAGCCAGGCGTGGTGGCCAGC  
GTCTGTAACCCACCTACTCGGGAGGCTGAGGCAGGAGAATCACCTGAACCCGGGAGGTGGAGGCCGCAATGAGC  
AGAGATCACGCCATTGCACTCCAGCCTGGGTGACAGAGCAAGACTCT

>hsamiR1273a

GGGCGACAAAGCAAGACTCTTTCTT

>AluS

GGTGGCTCACACCTGTAATCCCAGCACTTTGGAAGGCCAAGGTGGGTGGATCACGAGGTCAGGAGTTCGAGACC  
AGCCTGGCCAACATAGTGAAACCCATCTCTACTAAAATACAAAATAGCCGGGCGTGGTGGCGCTCGCCTATAA  
TCCCAGCTACTCAGCGGGCTGAGGCAGGAGAATTGCTTGAACCCGGGTGGTGGAGGTTGCAGTGAGCCAAGATT  
GCGCCACTGCACTCCAGCCTGGGCGACAAAGCAAGACTCT

>HARS

GGTGGCTCACACCTGTAATGCCAGCACTTGGGGAGGCCGAGGCGGGCGGATCACGAAGTCAGGAGATCAAGACC  
ATCCTGGCGAACACTGTGAAACCCCGTCTCTACTAAAAATACAAAAAATTAGCCGGGCGTGGTGGCAGGTGCCT  
GTAGTCCCAGCTACTTGGGAGGCTGAGGCAGGAGAATGGCGTGAACCCGGCAGGTGGAGCTTGCAGTGAGCTGA  
GATAGTGCCTACTGCACTCCAGCCTGGGAGACAGAGCAAGACTCT

>hsamiR1273a

GGGCGACAAAGCAAGACTCTTTCTT

>AluS

TCTCTACTAAAAATACAAAAATTAGCCGGGCGTGGTGGCGCTCGCCTATAATCCCAGCTACTCAGCGGGCTGAGG  
CAGGAGAATTGCTTGAACCCGGGTGGTGGAGGTTGCAGTGAGCCAAGATTGCGCCACTGCACTCCAGCCTGGGC  
GACAAAGCAAGACTCTTTCTTGGAAAAAA

>CDK10

TCTCTATTAATAAATACAAAAATTATCTGGCCGTGGTAGCATGCGCCTGCAGTCCAGCTACTCTGGAGGCTGAGGTA  
TGAGAATCGCTTGAACCTGGGAGGCAGAGGTTGCAGTGAGCCAAGACTGTACCACTGCACTCCAGCCTGGGCCAC  
AGAGCAAGACTCTGTCTCAGAAAAAA

>hsamiR1273a

GGGCGACAAAGCAAGACTCTTTCTT

>AluS

TGGTGGCTCACACCTGTAATCCCAGCACTTTGGAAGGCCAAGGTGGGTGGATCACGAGGTCAGGAGTTCGAGACC  
AGCCTGGCCAACATAGTGAAACCCATCTCTACTAAAAATACAAAAATTAGCCGGGCGTGGTGGCGCTCGCCTATAA  
TCCCAGCTACTCAGCGGGCTGAGGCAGGAGAATTGCTTGAACCCGGGTGGTGGAGGTTGCAGTGAGCCAAGATT  
GCGCCACTGCACTCCAGCCTGGGCGACAAAGCAAGACTCT

>ATP6V0A2

TGGTGGCTCACGCTGTAATCCCAGCACTTTGGGAAGCCAAGGTGGGTGGATCACGAGGTCAGGAGTTCGAGAC  
CAGCCTGGCCAAGATGGTAAAACCCATCTCTACTAAAAATACAAAAATTAGCCAGGCATGGTGGCACGTGCCTAT  
AATCCCAGCTACTTGGGAGGCTGAGGCAGGAGAATTGCTTGAACCCGGGAGGCACAGGCTGCAGTGAGCCGAGA  
TCGCACCACTACATGCACTCTAGCCTGGGCGACAGAGCAAGACTCT

>hsamiR1273a

GGGCGACAAAGCAAGACTCTTTCTT

>AluS

AATTAGCCGGGCGTGGTGGCGCTCGCCTATAATCCCAGC

>ATP6V0A2

AATTGGCCAGGCGTGGTGGCTCACGCTGTAATCCCAGCACTTTGGGAAGCCAAGGTGGGTGGATCACGAGGTC  
AGGAGTTCGAGACCAGCCTGGCCAAGATGGTAAAACCCATCTCTACTAAAAATACAAAAATTAGCCAGGCATGG  
TGGCACGTGCCTATAATCCCAGCTACTTGGGAGGCTGAGGCAGGAGAATTGCTTGAACCCGGGAGGCACAGGCT  
GCAGTGAGCCGAGATCGCACCACTACATGCACTCTAGCCTGGGCGACAGAGCAAGACTCT

>hsamiR1273a

GGGCGACAAAGCAAGACTCTTTCTT

>AluS

TCTCTACTAAAAATACAAAAATTAGCCGGGCGTGGTGGCGCTCGCCTATAATCCCAGCTACTCAGCGGGCTGAGG  
CAGGAGAATTGCTTGAACCCGGGTGGTGGAGGTTGCAGTGAGCCAAGATTGCGCCACTGCACTCCAGCCTGGGC  
GACAAAGCAAGACTCTTTCTT

>ATP6V0A2

TCTCTACTAAGAATACAAAAAATTAGCTGGGCATGGTGGCATGTGCCTGTAATCCCAGCTACTCAGGAGGCTGA  
GGCAGAAGAATCACGTGAACCCAGGAGATGGAGGTTGCAGTGAGCCAAGATCGTGTCACTGCACTCCAGCTTGG  
GTGACAGAGCAAGACTCCTTCT

>hsamiR1273a

GGGCGACAAAGCAAGACTCTTTCTT

>AluS

AATTAGCCGGCGTGGTGGCGCTCGCCTATAATCCCAGC

>ATP6V0A2

GACAGAGCAAGACTCCTTCTCAAAGTAAATAAATAAATAGGCTCATTTATTGTTTCATATTAATTCAGGTAATTTCT  
GTGAAGTTCACACCACATATTAGCTAAAACATTCCGAAGGCTGTGATGAGCGTGAGACCCCAAGACTGGCCCTC  
GTCTCTAACACAGGTGCTGTCAATTTCTCGGATTTCTTTGTCTGCTTATTCATATCACACATCAAAGACTCTTCTCT  
TTAAGTCTACATTTCTTTTTTTGCAACACAGAATATATTTAGATAATCTTTTCTAACTATTTTCTAGTCTCTAGCAT  
ATGAGTTACTATGCACTCACATTTACACAATTAATTGAGGATAAAAAATTCATGACAATTGGCCAGGCGTGGTGGCT  
CACGCCTGTAATCCCAGC

>hsamiR1273a

GGGCGACAAAGCAAGACTCTTTCTT

>AluS

GAGGTCAGGAGTTCGAGACCAGCCTGGCCAACATAGTGAAACCCATCTCTACTAAAAATACAAAAATTAGCCGGG  
CGTGGTGGCGCTCGCCTATAATCCCAGCTACTCAGCGGGCTGAGGCAGGAGAATTGCTTGAACCCGGGTGGTGG  
AGGTTGCAGTGAGCCAAGATTGCGCCACTGCACTCCAGCCTGGGCGACAAAGCAAGACTCT

>SETD4

GAGGTCAGGAGTTCAGACCAGCCTGGCCAACATGGTGAAACCCGTCTCTACTAAAAATACAAAAATCAGCCGG  
GCGTGGTGGCAGGCACCTGTAATACCAGCTACTGGGGAGGCTGAGGCAGGAGAATCGCTTGATCTCAGGAGGCC  
GAAGCTGCAGCTAGACGAGATCACGCCACTGCACTCCAACCTGGGCGACAGAGCGAGACTCT

>hsamiR1273a

GGGCGACAAAGCAAGACTCTTTCTT

>AluS

TGGTGGCTCACACCTGTAATCCCAGCACTTTGGAAGGCCAAGGTGGGTGGATCACGAGGTCAGGAGTTCGAGACC  
AGCCTGGCCAACATAGTGAAACCCATCTCTACTAAAAATACAAAAATTAGCCGGGCGTGGTGGCGCTCGCCTATAA  
TCCCAGCTACTCAGCGGGCTGAGGCAGGAGAATTGCTTGAACCCGGGTGGTGGAGGTTGCAGTGAGCCAAGATT  
GCGCCACTGCACTCCAGCCTGGGCGACAAAGCAAGACTC

>ZNF26

TGGTGGCTCATGCCTGTAATCCCAGCACTCTGGGAGGCCGAGGGAAGCGGATCACAAAGGTCAGGAGTTCAAGAC  
CAGCCTGACCAACACGGTCAAACCCGTCTCTACTAAAAATACAAAAATTAGCCAGGCGTGGGGGTGGGCACCTG  
CAATCCTAGCTACTCAGAAGGCTGAGGCAGGAGAATCGCTGGAACCAGAGAGGCAGAAGTTGCAGTGAGCCAAG  
ATCGCATCACTGCACTCCAGCCTGAGCGACAGAGCAAGACTC

>hsamiR1273a

GGGCGACAAAGCAAGACTCTTTCTT

>AluS

GTGGCTCACACCTGTAATCCCAGCACTTTGGAAGGCCAAGGTGGGTGGATCACGAGGTCAGGAGTTCGAGACCA  
GCCTGGCCAACATAGTGAAACCCATCTCTACTAAAAATACAAAAATTAGCCGGGCGTGGTGGCGCTCGCCTATAAT



CCCAGCTACTCAGCGGGCTGAGGCAGGAGAATTGCTTGAACCCGGGTGGTGGAGGTTGCAGTGAGCCAAGATTG  
CGCCACTGCACTCCAGCCTGGGCGACAAAGCAAGACT

>NCOA6

GTGGCTCACACCTGTAATCCCAGCACTTTAGGAGGCCAAGACGGGTGGATCACTTGAGGTCAGGAGTTTGAGACC  
AGCCTGGCCAACATAGTAAACCCCATCTCTACTAAAAACAAAAATCAGCCAGGTGTGGTGGCACATGCCTGT  
AGTCCCAGCTACTTGGGAGGCTGAGGCAAGAGAATCACTTGAACCTGGGAGACGGAGGTTACAATGAGCTGAGA  
TGGCACGACTGCACTCCAGCCTGGGCGACAGAGCAAGACT

>hsamiR1273a

GGGCGACAAAGCAAGACTCTTTCTT

>AluS

GGTGGCTCACACCTGTAATCCCAGCACTTTGGAAGGCCAAGGTGGGTGGATCACGAGGTCAGGAGTTGAGACC  
AGCCTGGCCAACATAGTAAACCCCATCTCTACTAAAAATACAAAAATTAGCCGGGCGTGGTGGCGCTCGCCTATA  
TCCCAGCTACTCAGCGGGCTGAGGCAGGAGAATTGCTTGAACCCGGGTGGTGGAGGTTGCAGTGAGCCAAGATT  
GCGCCACTGCACTCCAGCCTGGGCGACAAAGCAAGACTCT

>MSH5

GGTGGCTCACACCTGTAATCCCAGCACTTTGGGAGGCCGAGGCGGGTGGATCACGAGGTCAAGAGATCAAGACC  
ATCCTGGCCATCATGGTAAACCTGTCTCTACTAAAAATACAAAAATTAGCCAGGCATGGTGGCACACGCCTATA  
GTCCCAGCTACTCGGGAGGCTGAGGCAGGAGAATCACTTGAACCCAACCCGGGAGGTGGAGGTTGCAGTGAGC  
CAAGATTGTGCCACTGCACTCCAGCCTGGTGACAGAGCAAGACTCT

>hsamiR1273a

GGGCGACAAAGCAAGACTCTTTCTT

>AluS

TCTTGGCTGGGCTTGGTGGCTCACACCTGTAATCCCAGCACTTTGGAAGGCCAAGGTGGGTGGATCACGAGGTCA  
GGAGTTGAGACCAGCCTGGCCAACATAGTAAACCCCATCTCTACTAAAAATACAAAAATTAGCCGGGCGTGGT  
GCGCTCGCCTATAATCCCAGCTACTCAGCGGGCTGAGGCAGGAGAATTGCTTGAACCCGGGTGGTGGAGGTTGCA  
GTGAGCCAAGATTGCGCCACTGCACTCCAGCCTGGGCGACAAAGCAAGACTCT

>POU5F1

T

>hsamiR1273a

GGGCGACAAAGCAAGACTCTTTCTT

>AluS

AGGTCAGGAGTTGAGACCAGCCTGGCCAACATAGTAAACCCCATCTCTACTAAAAATACAAAAATTAGCCGGGC  
GTGGTGGCGCTCGCCTATAATCCCAGCTACTCAGCGGGCTGAGGCAGGAGAATTGCTTGAACCCGGGTGGTGA  
GGTTGCAGTGAGCCAAGATTGCGCCACTGCACTCCAGCCTGGGCGACAAAGCAAGACTC

>AC002511.1

AGGTCAGGAGTTGAGACCAACCTGGCTAACATGGTAAACCCCGACTCTACTAAAAATACAAAAATTAGTAGGG  
AGTGGTGGCACATGCCTGTAGTCTCAGCTACTCGGGAGGCTGAGGTAGGAGAATCACTTGAACCTGGGAAGCAG  
AGGTTGCAGTGAGCCAAGATAGCACCCTGCACTCCAGCCTGGACGACACAGCAAGACTC

>hsamiR1273a

GGGCGACAAAGCAAGACTCTTTCTT

>AluS

GTGGCTCACACCTGTAATCCCAGCACTTTGGAAGGCCAAGGTGGGTGGATCACGAGGTCAGGAGTTGAGACCA  
GCCTGGCCAACATAGTAAACCCCATCTCTACTAAAAATACAAAAATTAGCCGGGCGTGGTGGCGCTCGCCTATAAT

CCCAGCTACTCAGCGGGCTGAGGCAGGAGAATTGCTTGAACCCGGGTGGTGGAGGTTGCAGTGAGCCAAGATTG  
CGCCACTGCACTCCAGCCTGGGCGACAAAGCAAGACTCT

>C15orf63

GTGGCTCACGCCTGTAATCCCAGCACTTTGGGAGGCTGAGGCGGGCGGATCACGAGGTCAAGAGATCAAGACAA  
TCCTGGCTAACATGGTGAACCCCATCTCTACTAAAAATACAAAATATTAGCCGGGCATGGTGGCACGCACCTGTA  
ATCCCAGCTGCTCAGGAGGTGGAGGCAGAAGAATCACTTGAACCCGGGAGGCAGAGGTTGCAGTGAGCTGAAAT  
CACACCACTGCACTCTAGCCTGGGTGACAGAGCAAGACTCT

>hsamiR302e

TAAGTGCTTCCATGCTT

>THER1\_SINE\_Mammalia

TGCTTCCATGCTTCA

>ADAM28

TGCTTCCATGCTTCA

>hsamiR1277\_5p

AAATATATATATATATGTACGTAT

>EnSpm-8\_HM

AAATATATATATATAT

>PTPN3

AAATATATATATATAT

>hsamiR1277\_3p

TACGTAGATATATATGTATTTT

>EnSpm-8\_HM

ATATATATATATATGTA

>PDE4D

ATATATATATATATGTAT

>hsamiR1277\_5p

AAATATATATATATATGTACGTAT

>EnSpm-8\_HM

ATATATATATATATGTA

>PDE4D

ATATATATATATATGTA

>hsamiR1277\_5p

AAATATATATATATATGTACGTAT

>EnSpm-8\_HM

AAATATATATATATAT

>RND3

AAATATATATATATAT

>hsamiR1277\_5p

AAATATATATATATATGTACGTAT

>EnSpm-8\_HM

AAATATATATATATAT

>RND3

AAATATATATATATATATATAT

>hsamiR1277\_5p  
AAATATATATATATATGTACGTAT  
>EnSpm-8\_HM  
AAATATATATATATAT  
>RND3  
AAATATATATATATATATAT

>hsamiR1277\_5p  
AAATATATATATATATGTACGTAT  
>EnSpm-8\_HM  
AAATATATATATATAT  
>RND3  
AAATATATATATATATAT

>hsamiR1277\_5p  
AAATATATATATATATGTACGTAT  
>EnSpm-8\_HM  
AAATATATATATATAT  
>GPR132  
AAATATATATATATAT

>hsamiR1277\_5p  
AAATATATATATATATGTACGTAT  
>EnSpm-8\_HM  
AAATATATATATATAT  
>SRGAP1  
AAATATATATATATAT

>hsamiR1277\_5p  
AAATATATATATATATGTACGTAT  
>EnSpm-8\_HM  
AAATATATATATATAT  
>SRGAP1  
AAATATATATATATATATATATATATATATAT

>hsamiR1277\_5p  
AAATATATATATATATGTACGTAT  
>EnSpm-8\_HM  
AAATATATATATATAT  
>SRGAP1  
AAATATATATATATATATATATATATAT

>hsamiR1277\_5p  
AAATATATATATATATGTACGTAT  
>EnSpm-8\_HM  
AAATATATATATATAT

>SRGAP1  
AAATATATATATATATATATATAT

>hsamiR1277\_5p  
AAATATATATATATATGTACGTAT  
>EnSpm-8\_HM  
AAATATATATATATAT  
>SRGAP1  
AAATATATATATATATATATAT

>hsamiR1277\_5p  
AAATATATATATATATGTACGTAT  
>EnSpm-8\_HM  
AAATATATATATATAT  
>SRGAP1  
AAATATATATATATATATAT

>hsamiR1277\_5p  
AAATATATATATATATGTACGTAT  
>EnSpm-8\_HM  
AAATATATATATATAT  
>SRGAP1  
AAATATATATATATATAT

>hsamiR1277\_5p  
AAATATATATATATATGTACGTAT  
>EnSpm-8\_HM  
AAATATATATATATAT  
>AC120194.1  
AAATATATATATATAT

>hsamiR1277\_5p  
AAATATATATATATATGTACGTAT  
>EnSpm-8\_HM  
AAATATATATATATAT  
>AC120194.1  
AAATATATATATATATAT

>hsamiR1277\_5p  
AAATATATATATATATGTACGTAT  
>EnSpm-8\_HM  
AAATATATATATATAT  
>AC120194.1  
AAATATATATATATATATTTGTA

>hsamiR1277\_3p  
TACGTAGATATATATGTATTTT  
>EnSpm-8\_HM

TATATATATGTACGTATGTGTATATA

>C9orf38

TATATATATGTATATATGTGTATATA

>hsamiR1277\_5p

AAATATATATATATATGTACGTAT

>EnSpm-8\_HM

TATATATATGTACGTATGTGTATATA

>C9orf38

TATATATATGTATATATGTGTATATA

>hsamiR1255b2\_3p

AACCACTTTCTTTGCTCATCCA

>TIGGER1

CTCAAGAAACCACTTTCTTTGCTCATCCATAAGGAGCAACTC

>SCAF11

CTCAAGAAACCACATTCTTTGTTTCATCCCTAAGAAACAACTC

>hsamiR1321

CAGGGAGGTGAATGTGAT

>MIRc

GGAGGTGAATGTGA

>GOLM1

GGAGGTGAATGTGA

>hsamiR1321

CAGGGAGGTGAATGTGAT

>MIRc

GAGGTGAATGTGAT

>PP2D1

GAGGTGAATGTGAT

>hsamiR720

TCTCGCTGGGGCCTCCA

>HERVS71

CTCGCTGGGGCCTCCAAA

>C3orf32

CTCCCTGGGGCCTCCAAA

>hsamiR1913

TCTGCCCCCTCCGCTGCTGCCA

>LTR16\_FC

CCCTCCGCTGCTGCCA

>MTHFR

CCCTCCGCTGCTGCCA

>hsamiR1915\_3p

CCCCAGGGCGACGCGGCGGG

>CLOXA\_CS\_DNA\_binding\_protein\_Canis\_sp.  
GGGCGACGCGGCGGG  
>RNF4  
GGGCGACGCGGCGGG

>hsamiR1915\_5p  
ACCTTGCCTTGCTGCCCGGGCC  
>CLOXA\_CS\_DNA\_binding\_protein\_Canis\_sp.  
CTTGCCTTGCTGCC  
>GGT1  
CTTGCCTTGCTGCC

>hsamiR1915\_3p  
CCCCAGGGCGACGCGGCGGG  
>CLOXA\_CS\_DNA\_binding\_protein\_Canis\_sp.  
ACGGCGGAGAGGCGACGCGGGTGGCGCTGCAGAGGGTACGGTGGGGGGCGGGGAAGAGGGGGGGCG  
>TCFL5  
ACGGCGGCGAGGGCGACGCGGGCGGCGGGCGGGAGGCGGGAGGCGGGAGGCGGGAGGCG

>hsamiR1915\_3p  
CCCCAGGGCGACGCGGCGGG  
>CLOXA\_CS\_DNA\_binding\_protein\_Canis\_sp.  
AGGGCGACGCGGCGGGGGCGGC  
>TCFL5  
AGGGCGACGCGGGCGGCGGGCGGC

>hsamiR1915\_5p  
ACCTTGCCTTGCTGCCCGGGCC  
>CLOXA\_CS\_DNA\_binding\_protein\_Canis\_sp.  
TGCCTTGCTGCCCGG  
>FBXO24  
TGCCTTGCTGCCCGG

>hsamiR1915\_5p  
ACCTTGCCTTGCTGCCCGGGCC  
>CLOXA\_CS\_DNA\_binding\_protein\_Canis\_sp.  
GCTGCCCGGGCCGTGCACCCGTGGG  
>CCDC92  
GCTGCCCGGGCCGGGCGCCGAGGG

>hsamiR1915\_5p  
ACCTTGCCTTGCTGCCCGGGCC  
>CLOXA\_CS\_DNA\_binding\_protein\_Canis\_sp.  
CTTGCCTTGCTGCC  
>GGT2  
CTTGCCTTGCTGCC

>hsamiR1915\_5p



>hsamiR1972  
TCAGGCCAGGCACAGTGGCTCA  
>AANU01178229.1\_7254x6952\_RF00100\_7SK  
TGGTGGCATGCACCTGTAATCCCAGCA  
>AACS  
TGGTGGCTTACACCTGTAATCCCAGCACTTTGGGAGGCTG

>hsamiR1972  
TCAGGCCAGGCACAGTGGCTCA  
>AANU01178229.1\_7254x6952\_RF00100\_7SK  
GGCCAGGCACAGTGGCTCATGCCTGTAATCCCAGCAATTTGGGAGGCTGAGGCAGGCGGATCACCTGAGGTCAG  
GAGTTCGAGACCAGCCTGGCCAACATAGTGAAACCCTGTCTCTACTAAAATA  
>AACS  
GGCCAGACACAGTGGCTCACACCTGTAATCCCAGCATTTCGGGAGGCCAAGGTGGGTGGATCACCTGAGGTCAG  
GAGCTCGAGACCAGCCTGACCAACACGGTGAAATCTCATCTCTACTAAAATA

>hsamiR1972  
TCAGGCCAGGCACAGTGGCTCA  
>AANU01178229.1\_7254x6952\_RF00100\_7SK  
TTCAGGCCAGGCACAGTGGCTCATGCCTGTAATCCCAGCAATTTGGGAGGCTGAGGCAGGCGGATCACCTGAGGT  
CAGGAGTTCGAGACCAGCCTGGCCAACATAGTGAAACCCTGTCTCTACTAAAATAACAAGAAATTAGCCAGATGT  
GGTGGCATGCACCTGTAATCCCAGCAATTCAGGAGGTTGAGGCAGGAGAAACACTTGAACCCGGGAGGCAGAGA  
TTGCAGTGAGGTGAGATTGTGCTACTGCACTCCAGCCTGGGCAACAGAGTGAGACT  
>SLC24A6  
TTCAGGCCCGGCACGGTGGCTCACCGCCTGTAATCGCAGCACTTTGGGAGGCCGAGGCGGGCAGATCACCTGAG  
GTCAGGAGTTCGAGACCAACTTGGCCAACATGGTGAAACCCTGTCTCTACTAAAATAACAAAATTAGTCAGGCTG  
GTGTCACACACCTGTAATCCCAGCTACTCGAGAGGCTGAGGTGGGAGAATCGCTTGAACCCGGGAGGCAGAAGT  
TGCAGTGAGCCTAGATCATGCCAGTGTACTCTAGCCTGGGCGACTGAGTGAGACT

>hsamiR1972  
TCAGGCCAGGCACAGTGGCTCA  
>AANU01178229.1\_7254x6952\_RF00100\_7SK  
GCCAGGCACAGTGGCTCATGCCTGTAATCCCAGCAATTTGGGAGGCTGAGGCAGGCGGATCACCTGAGGTCAGG  
AGTTCGAGACCAGCCTGGCCAACATAGTGAAACCCTGTCTCTACT  
>EIF3E  
GCCAGGCGCAGTGGCTCACGCCTGTAATCCCAGCACTTTGGGAGGCCGAGGCAGGCGGATCACGAGGTCAGGAG  
ATCGAGACCATCCTGGCTAACACGGTGAAACCCTGTCTCTACT

>hsamiR1972  
TCAGGCCAGGCACAGTGGCTCA  
>AANU01178229.1\_7254x6952\_RF00100\_7SK  
GCCAGGCACAGTGGCTCATGCCTGTAATCCCAGCAATTTGGGAGGCTGAGGCAGGCGGATCACCTGAGGTCAGG  
AGTTCGAGACCAGCCTGGCCAACATAGTGAAACCCTGTCTCTACTAAAATAACAAGAAATTAGCCAGATGTGGTG  
GCATGCACCTGTAATCCCAGCAATTCAGGAGGTTGAGGCAGGAGAAACACTTGAACCCGGGAGGCAGAGATTGC  
AGTGAGGTGAGATTGTGCTACTGCACTCCAGCCTGG  
>AKT2



GCCAGGCGCAGTGGCTCATGCCTATAATCCCAGCACTTTGGGAGGCTGAGGCGGATGGATCACAAGGTCAGGAG  
TTCGAGACCAGCCTGGCCAACATGGTGAAACCCCGTCTCTACTAAAAATACAAAATTAGTCAGGGGTGGCATTCCG  
CCTAATCCCAGCTACTCAGGAGGCTGAGGCAGGAGAATTGCTTGAACCCGGGAGGCGGAGGGTGCAGTGAGCAG  
AGATCGCACCCTGCACTCCAGCCTGG

>hsamiR1972

TCAGGCCAGGCACAGTGGCTCA

>AANU01178229.1\_7254x6952\_RF00100\_7SK

GGCCAGGCACAGTGGCTCATGCCTGTAATCCCAGCAATTTGGGAGGCTGAGGCAGGCGGATCACCTGAGGTCAG  
GAGTTCGAGACCAGCCTGGCCAACATAGTGAAACCCGTCTCTACTAAAAATACAAGAAATTAGCCAGATGTGGT  
GGCATGCACCTGTAATCCCAGCAATTCAGGAGGTTGAGGCAGGAGAAACACTTGAACCCGGGAGGCAGAGATTG  
CAGTGAGGTGAGATTGTGCTACTGCACTCCAGCCTGGGCAACAGAGTGAGACT

>FAM54B

GGCCAGGCGCAGTGGCTCACATCTGTAATCCCAGCACTTTGGGAGGCCGAGGTGGGCGGATCACGAGGTCAGGA  
GAGCGAGACCATCCTGGCTAACACAGTGAAGCCCTGTCTCTACTAAAAATACAAAAAATTAGCCAGGTGTGGTGG  
CGGGCACCTGTAGTACCAGCTACTTGGGAGGCTGAGGCAGGAGAATGGCGTGAACCCAGGAGGCAGAGCTTGCA  
GTGAGCCGAGATCACGCCACTGCACTCCAACCTGGGTGACAGAGCGAGACT

>hsamiR1972

TCAGGCCAGGCACAGTGGCTCA

>AANU01178229.1\_7254x6952\_RF00100\_7SK

GGCCAGGCACAGTGGCTCATGCCTGTAATCCCAGCAATTTGGGAGGCTGAGGCAGGCGGATCACCTGAGGTCAG  
GAGTTCGAGACCAGCCTGGCCAACATAGTGAAACCCGTCTCTACTAAAAATACAAGAAATTAGCCAGATGTGGT  
GGCATGCACCTGTAATCCCAGCAATTCAGGAGGTTGAGGCAGGAGAAACACTTGAACCCGGGAGGCAGAGATTG  
CAGTGAGGTGAGATTGTGCTACTGCACTCCAGCCTGG

>TUBGCP2

GGCCGGGCACAGTGGCTCACGCCTGTAACCCAGCACTTTGGGAGGCTGAGGTGGGCAGATCACGAAGTCAAGA  
GATCAAGACCATCCTGGCCAACACAGTGAACCCCGTCTCTACTAAAATACAAAAAATCAGCTGGGCGTGGTGGT  
GTGCACCTGTAGTCCCAGCTACTTGGGAGGTTAAGGCAGGGGAATCGCTTGAACCTGGGAGGTGGGGGTTGCAG  
CGAGCCGAGATCATGCCACTGCACTCCAGCCTGG

>hsamiR1972

TCAGGCCAGGCACAGTGGCTCA

>AANU01178229.1\_7254x6952\_RF00100\_7SK

GCACAGTGGCTCATGCCTGTAATCCCAGCAATTTGGGAGGCTGAGGCAGGCGGATCACCTGAGGTCAGGAGTTC  
GAGACCAGCCTGGCCAACATAGTGAAACCCGTCTCTACTAAAAA

>TBC1D5

GCACAGTGGCTCACACCTGTAATTCCAGCACCTTGGGAGGCCGAGATGGACACATCACTTGAGGTCAGGAGGTCC  
ATACCAGCCTGGCCAACATGGTGAAACTCCTCCGTCTCTACTAAAAA

>hsamiR1972

TCAGGCCAGGCACAGTGGCTCA

>AANU01178229.1\_7254x6952\_RF00100\_7SK

AGGCCAGGCACAGTGGCTCATGCCTGTAATCCCAGCAATTTGGGAGGC

>GPR172B

AGGCCAGGCACCGTGGCTCAGGCCTGTAATCCCAGCACTTTGGGAGGC

>hsamiR1972

TCAGGCCAGGCACAGTGGCTCA

>AANU01178229.1\_7254x6952\_RF00100\_7SK

GGCACAGTGGCTCATGCCTGTAATCCCAGCAATTTGGGAGGCTGAGGCAGGCGGATCACCTGAGGTCAGGAGTT  
CGAGACCAGCCTGGCCAACATAGTGAAACCCTGTCTCTACTAAAAATACAAGAAATTAGCCAGATGTGGTGGCAT  
GCACCTGTAATCCCAGCAATTCAGGAGGTTGAGGCAGGAGAAACACTTGAACCCGGGAGGCAGAGATTGCAGTG  
AGGTGAGATTGTGCTACTGCACTCCAGCCTGGGCAACAGAGTGAGACT

>C14orf79

GGCACAGTGGCTCACGCCTGTAATCCCAGCACTTTGGGAGGCTGAGGCTGACAGATCAGGAGGTCAGGAGTTCA  
AGATCTGCCTGGCCAACATAGTGAAACCCCGTCTCTACTAAAAATACAAAAAATAGCCGGGCGTGGTGTGGGG  
GCCTGTCATCCCAGCTACTGGGGAGGCTGAGGCAGGAGAATCGCTTGAACCCGGGAGGCAGGTTGCAGGGA  
GCGGAGATCGCGCCACTGCACTCCAGCCTGGGGACAGAGTGAGACT

>hsamiR1972

TCAGGCCAGGCACAGTGGCTCA

>AANU01178229.1\_7254x6952\_RF00100\_7SK

CAGGCCAGGCACAGTGGCTCATGCCTGTAATCCCAGCAATTTGGGAGGCTGAGGCAGGCGGATCACCTGAGGTC  
AGGAGTTTCGAGACCAGCCTGGCCAACATAGTGAAACCCTGTCTCTACTAAAAATACAAGAAATTAGCCAGATGTG  
GTGGCATGCACCTGTAATCCCAGCAATTCAGGAGGTTGAGGCAGGAGAA

>CNTN4

CAGGCCGGGCACGGTGGCTCACGCCTGTCATCCCAGCACTTTGGGAGGCCGAGGCGGGCGGATCACGAGGTCAG  
GAGATCGAGACCATCCTGGCTAACACGGTGAAACCCCGTCTCTACTAAAAATACAAAAAATTAGCCAGGCGTGGTG  
GCGGCGCCTGTAGTCCCAGCTACTCGGGAGGCTGAGGCGGGAGAA

>hsamiR1972

TCAGGCCAGGCACAGTGGCTCA

>AANU01178229.1\_7254x6952\_RF00100\_7SK

CAGGCCAGGCACAGTGGCTCATGCCTGTAATCCCAGCAATTTGGGAGGCTGAGGCAGGCGGATCACCTGAGGTC  
AGGAGTTTCGAGACCAGCCTGGCCAACATAGTGAAACCCTGTCTCTACTAAAAATACAAGAAATTAGCCAGATGTG  
GTGGCATGCACCTGTAATCCCAGCAATTCAGGAGGTTGAGGCAGGAGAAACACTTGAACCCGGGAGGCAG

>SLC25A45

CAGGCCAGGCGCAGTGGCTCACGCCTGTAATCCCAGCACTTTGGGAGGCCGAGGCGGAAGGACCACCTGAGGTC  
AGGAGTTTCGAGACCAGCCTGACCAACATAGTGAAACCCCATCTCTACAAAAATACAAAAAATTAGCCGGGTGTGA  
TGACGGGCGCCTGTAGTCCCAGCTACTGGGATGCTGAGGCAGGAGAATCGCTTGAACCCGAGAGGCAG

>hsamiR1972

TCAGGCCAGGCACAGTGGCTCA

>AANU01178229.1\_7254x6952\_RF00100\_7SK

AGGCCAGGCACAGTGGCTCATGCCTGTAATCCCAGCAATTTGGGAGGCTGAGGCAGGCGGATCACCTGAGGTC  
GGAGTTTCGAGACCAGCCTGGCCAACATAGTGAAACCCTGTCTCTACTAAAAATACAAGAAATTAGCCAGATGTGG  
TGGCATGCACCTGTAATCCCAGCAATTCAGGAGGTTGAGGCAGGAGAA

>NLRP3

AGGCCGGGCACAGTGGCTCACGCCTGTAATCCCAGCACTTTGAGAGGCCAAGGCAGGCAGATCACCTGAGCTGA  
GGAATTCAGACCAGCCTGGCCAACATGGCAAACTGTGTCTCTACTAAAAGTACAAAAATGAGCCGGGTGTGGT  
GGCGGGCGCCTGTAATCCCAGCTACTCAGGAAGTTGAGGTAGGAGAA

>hsamiR1972

TCAGGCCAGGCACAGTGGCTCA

>AANU01178229.1\_7254x6952\_RF00100\_7SK

AGGCCAGGCACAGTGGCTCATGCCTGTAATCCCAGCAATTTGGGAGGCTGAGGCAGGCGGATCACCTGAGGTCA  
GGAGTTCGAGACCAGCCTGGCCAACATAGTGAAACCCTGTCTCTACTAAAAATACAAGAAATTAGCCAGATGTGG  
TGGCATGCACCTGTAATCCCAGCAATTCAGGAGGTTGAGGCAGGAGAA

>NLRP3

CAAGTCAAAATCTTTAATTTTAAAAAGTTAGCCAAGGCCGGGCACAGTGGCTCACGCCTGTAATCCCAGCACTTTG  
AGAGGCCAAGGCAGGCAGATCACCTGAGCTGAGGAATTCAAGACCAGCCTGGCCAACATGGCAAACTGTGTCT  
CTACTAAAAGTACAAAAATGAGCCGGGTGTGGTGGCGGGCGCCTGTAATCCCAGCTACTCAGGAAGTTGAGGTA  
GGAGAA

>hsamiR1972

TCAGGCCAGGCACAGTGGCTCA

>AANU01178229.1\_7254x6952\_RF00100\_7SK

GGCCAGGCACAGTGGCTCATGCCTGTAATCCCAGCAATTTGGGAGGCTGAGGCAGGCGGATCACCTGAGGTGAG  
GAGTTCGAGACCAGCCTGGCCAACATAGTGAAACCCTGTCTCTACTAAAAATACAAGAAATTAGCCAGATGTGGT  
GGCATGCACCTGTAATCCCAGCAATTCAGGAGGTTGAGGCAGGAGAAACACTTGAACCCGGGAGGCAGAGATTG  
CAGTGAGGTGAGATTGTGCTACTGCACTCCAGCC

>STRBP

GGCCAGTCACAGTGGCTCATACCTGTAATCCAGCACTTTAGGAGCCAAGGCCGGGTGGATCACCTGAGGTCAGGA  
GTTTCGAGACCAGCCTGGCCAACATGGTGAACCCCGACGCTACTAAAAATACAAAAATTAGCCAGGCATGGTGGT  
GCGCACCTGTAGTCCCAGCTACTCAGGAAGCCGAGGCAGAAATTGCTTGAACCTGGGAGGCGGAGATTGCAGTGA  
GCCGAGATTGCGCCACTGTACTCCAGCC

>hsamiR1972

TCAGGCCAGGCACAGTGGCTCA

>AANU01178229.1\_7254x6952\_RF00100\_7SK

CAGGCACAGTGGCTCATGCCTGTAATCCCAGCAATTTGGGAGGCTGAGGCAGGCGGATCACCTGAGGTCAGGAG  
TTCGAGACCAGCCTGGCCAACATAGTGAAACCCTGTCTCTACTAAAAATACAAGAAATTAGCCAGATGTGGTGGCA  
TGCACCTGTAATCCCAGCAATTCAGGAGGTTGAGGCAGGAGAAACACTTGAACCCGGGAGGCAGAGATTGCAGT  
GAGGTGAGATTGTGCTACTGCACTCCAGCCTGGGCAA

>TMEM130

CAGGCACGGTGGCTCATGCCTGTAATCCAGCACTTTGGGAGGCCGAGGTGGGTGGATCACCTGAGGTCAGGCG  
TTTGAGACCGCCTGGCCAACATGGCGAAACCCCGTCTCTACTAACAATACAAAATTAGCCGGGTGTGGTGGCGA  
ACGCCTGTAATCTCAGCTACTCGGGAGGCTGAGGCCGGAGAATTACTTGAACCTGGGAGATGGTGGTTGCCGTGA  
GCCGAGATTGCGCCACTGCACTCCAGCCTGGGCAA

>hsamiR1972

TCAGGCCAGGCACAGTGGCTCA

>AANU01178229.1\_7254x6952\_RF00100\_7SK

CAGGCCAGGCACAGTGGCTCATGCCTGTAATCCCAGCAATTTGGGAGGCTGAGGCAGGCGGATCACCTGAGGTC  
AGGAGTTCGAGACCAGCCTGGCCAACATAGTGAAACCCTGTCTCTACTAAAAATACAAGAAATTAGCCAGATGTG  
GTGGCATGCACCTGTAATCCCAGCAATTCAGGAGGTTGAGGCAGGAGAAACACTTGAACCCGGGAGGCAGAGAT  
TGCAGTGAGGTGAGATTGTGCTACTGCACTCCAGCCTGGGCAACAGAGTGAGACT

>DDB1

CAGGCCAGGCACAGTGGCTCACGCTTGAATCCAGCACTTCGGGAGGCCGAGGCAGGCAGATCACAAGGGCAA  
GAGTTCGAGACCAGGCTGGCCAACACAGTGAAACCCATCTGTAATAAAAAATACAAAAATTAGCTGGGCATGGTG

GCACGCGCCTGTAATCCCAACTACTCAGGAGGCTGGGCCAGGAGAATCGCTTGAACCTGGGAGGTAGAGGTTGC  
AGTGAGCCGAGATCGTGCCACTGCACTCCAGCCTGGACGACAGGGTGAGACT

>hsamiR1972

TCAGGCCAGGCACAGTGGCTCA

>AANU01178229.1\_7254x6952\_RF00100\_7SK

AGGCCAGGCACAGTGGCTCATGCCTGTAATCCCAGCAATTTGGGAGGCTGAGGCAGGCCGATCACCTGAGGTCA  
GGAGTTCGAGACCAGCCTGGCCAACATAGTGAAACCCTGTCTCTACTAAAAATACAAGAAATTAGCC

>HARS

AGGCCAGGCACAGTGGCTCACGCCTGTAATCCCAGCACTTCGGGAGGCCAAGGCAGATGGATTGCCTGAGGTCA  
GGGGTTCGAGACCAGCCTGGCCAACATGGTGAAACCCTGTCTCTACTAAAAATACAGAAATTAGCC

>hsamiR1972

TCAGGCCAGGCACAGTGGCTCA

>AANU01178229.1\_7254x6952\_RF00100\_7SK

CCAGGCACAGTGGCTCATGCCTGTAATCCCAGCAATTTGGGAGGC

>ADCY6

CCAGGCACAGTGGCTTACACCTGTAATCCCAGCACTTTGTGAGGC

>hsamiR1972

TCAGGCCAGGCACAGTGGCTCA

>AANU01178229.1\_7254x6952\_RF00100\_7SK

CCAGGCACAGTGGCTCATGCCTGTAATCCCAGCAATTTGGGAGGC

>ADCY6

CCAGGCACAGTGGCTTACACCTGTAATCCCAGCACTTTGTGAGGCCGAGA

>hsamiR1972

TCAGGCCAGGCACAGTGGCTCA

>AANU01178229.1\_7254x6952\_RF00100\_7SK

GGCACAGTGGCTCATGCCTGTAATCCCAGCAATTTGGGAGGCTGAGGCAGGCCGATCACCTGAGGTCAGGAGTT  
CGAGACCAGCCTGGCCAACATAGTGAAACCCTGTCTCTACTAAAAATACAAGAAATTAGCCAGATGTGGTGGCAT  
GCACCTGTAATCCCAGCAATTCAGGAGGTTGAGGCAGGAGAAACACTTGAACCCGGGAGGCAGAGATTGCAGTG  
AGGTGAGATTGTGCTACTGCACTCCAGCCTGGGCAACAGAGTGAGACT

>LRRC37A

GGCACAGTGGCTCATGCCTGTAATCCCAGCACTTTGGGACGCCAAGGTGGGTGGATCACTTGAGCTCAGGAGTTC  
AAGACCAGCCTGGCCAACATGATGAAACCCCATCTCTACTAAAAATACAAAATTAGCTGAGTGTGGTGACGCGT  
GTCTATAATCCCAGCTACTCAGGAGGCTGAGGTAGGAGAATCACTTGAACCTGGGAGGTGGAGGTTGCAATGAG  
CTGGGATCATACCACTGCACTCCAGCCTGGACAACAGAGCGAGACT

>hsamiR1972

TCAGGCCAGGCACAGTGGCTCA

>AANU01178229.1\_7254x6952\_RF00100\_7SK

GGCCAGGCACAGTGGCTCATGCCTGTAATCCCAGCAATTTGGGAGGCTGAGGCAGGCCGATCACCTGAGGTCAG  
GAGTTCGAGACCAGCCTGGCCAACATAGTGAAACCCTGTCTCTACTAAAAATACAAGAAATTAGCCAGATGTGGT  
GGCATGCACCTGTAATCCCAGCAATTCAGGAGGTTGAGGCAGGAGAAACACTTGAACCCGGGAGG

>D2HGDH

GGCCGGGCACAGTGGCTCACACCTGTAATCCCAGCACTTTGGGAGGCTGAGGTGGGTGGATCACCTGAGGTCAC  
GAGTTCGAGACCAGCCTGGACAACACGGCAAAACCCTGTCTGTACTAAAAATACAAAAATTAGCTGAGTGTGGTG  
GCAGGTGCCCCGTAATCCCAGCTACTCAGGAGGCTGAGGCAGGAGAATTGTTTGAACCCGGGAGG

>hsamiR1972

TCAGGCCAGGCACAGTGGCTCA

>AANU01178229.1\_7254x6952\_RF00100\_7SK

GCCAGGCACAGTGGCTCATGCCTGTAATCCCAGCAATTTGGGAGGCTGAGGCAGGCGGATCACCTGAGGTCAGG  
AGTTCGAGACCAGCCTGGCCAACATAGTGAAACCCTGTCTCTACTAAAAATACAAGAAATTAGCCAGATGTGGTG  
GCATGCACCTGTAATCCCAGCAATTCAGGAGGTTGAGGCAGGAGAAACACTTGAACCCGGGAGGCAGAGATTGC  
AGTGAGGTGAGATTGTGCTACTGCACTCCAGCCTGGGCAACAGA

>BRF1

GCCAGGCACAGTGGCTCACGCCTGTAATCCCAGCACTTTGGGAGGTCGAGGCGGGCGGATCATGAGGTCAGGAG  
ATCAAGACCATCCTGGCTAACACGGTGAACCCCGTCTCTAATAAAAAATACAAAAAATTAGCCAGGCGTGGTGGC  
AGGCGCCTGTAGTCCCCCTACTCAGGAGGCTGAGGCAGGAGAATGGCATGAACCCGGGAGGCAGAGCTTGCGAG  
TGAGCTGAGATGGCACCCTGCACTCCAGCCTGGGCGACAGA

>hsamiR1972

TCAGGCCAGGCACAGTGGCTCA

>AANU01178229.1\_7254x6952\_RF00100\_7SK

AGGCCAGGCACAGTGGCTCATGCCTGTAATCCCAGCAATTTGGGAGGCTGAGG

>BRF1

AGGCCGGGCACAGTGGCTCACACCTGTTATCCCAGCACTTTGGGAGGCTGAGG

>hsamiR1972

TCAGGCCAGGCACAGTGGCTCA

>AANU01178229.1\_7254x6952\_RF00100\_7SK

CAGGCCAGGCACAGTGGCTCATGCCTGTAATCCCAGCAATTTGGGAGGCTGAGGCAGGCGGATCACCTGAGGTC  
AGGAGTTCGAGACCAGCCTGGCCAACATAGTGAAACCCTGTCTCTACTAAAAAT

>BRF1

CAGGCCAGGACAGTGGCTCACGCCTGTCATCCCAGCACTTTGGGAGGCAGAGGTGGGAGGATAGCTTGAGCCCA  
GGAGTTCGAGACCAGCCTGGGCAACAAAGTGAGATCCCTGTCTCTACAAAAAAT

>hsamiR1972

TCAGGCCAGGCACAGTGGCTCA

>AANU01178229.1\_7254x6952\_RF00100\_7SK

GGCACAGTGGCTCATGCCTGTAATCCCAGCAATTTGGGAGGCTGAGGCAGGCGGATCACCTGAGGTCAGGAGTT  
CGAGACCAGCCTGGCCAACATAGTGAAACCCTGTCTCTACTAAAAATACAAGAAATTAGCCAGATGTGGTGGCAT  
G

>BRF1

GGCACAGTGGCTCACATCTGTGATCTCAGCACTTTGGGAGGCTGAGGAGGGAGGATTGCTTGAGTCCAGGAGTTT  
GAGACCAGCCTAAGCAACATGGCAAAACCCTGACTCTACAAAAACTACAAAAACTTAGCCGGTTGTGGTAGCATG

>hsamiR1972

TCAGGCCAGGCACAGTGGCTCA

>AANU01178229.1\_7254x6952\_RF00100\_7SK

AATTCAGGCCAGGCACAGTGGCTCATGCCTGTAATCCCAGCAATTTGGGAGGCTGAGGCAGGCGGATCACCTGAG  
GTCAGGAGTTCGAGACCAGCCTGGCCAACATAGTGAAACCCTGTCT

>CDK10

AATTGAGGCCAGGCACAGTGGCTCATGTGTGCAATCCCAGCACTTTGGGAGACCAAGCAGGGCGGATAAATTGA  
GGTCAGGAGTTTGAGACCTCCCTGGCTAACATGGCAAAACCCTGTCT

>hsamiR1972

TCAGGCCAGGCACAGTGGCTCA

>AANU01178229.1\_7254x6952\_RF00100\_7SK

GCACAGTGGCTCATGCCTGTAATCCCAGCAATTTGGGAGGCTGAGGCAGGCGGATCACCTGAGGTCAGGAGTTC  
GAGACCAGCCTGGCCAACATAGTGAAACCCTGTCTCTACTAAAAATACAAGAAATTAGCCAGATGTGGTGGCATG  
CACCTGTAATCCCAGCAATTCAGGAGGTTGAGGCAGGAGAAACACTTGAACCCGGGAGGCAGAGATTGCAGTGA  
G

>BACE1

GCACAGTGGCTCACAACCTGTAATCCCAACACTTTGAGAGGCTAAGGCGGGTGGATCACTTGAGGTCAGGAGTTC  
AGACCAGCCTGGTGAATGTAGTAAAATCCCATCTCTACTAAAAATACAAGATTAGCCGGGTGTGGTGACGCACG  
CCTATAATCCCAGCTACTTGGGAGGCTGAGGCAGGAGAATCACTTGAACCCAGGAGGCGGAGGTTGCAGTGAG

>hsamiR1972

TCAGGCCAGGCACAGTGGCTCA

>AANU01178229.1\_7254x6952\_RF00100\_7SK

GGCCAGGCACAGTGGCTCATGCCTGTAATCCCAGCAATTTGGGAGGCTGAGGCAGGCGGATCACCTGAGGTCAG  
GAGTTCGAGACCAGCCTGGCCAACATAGTGAAACCCTGTCTCTACTAAAAATACAAGAAATTAGCCAGATGTGGT  
GGCATGCACCTGTAATCCCAGCAATTCAGGAGGTTGAGGCAGGAGAAACACTTGAACCCGGGAGGCAGAGATTG  
CAGTGAGGTGAGATTGTGCTACTGCACTCCAGCCTGGGCAACAGAG

>PRR19

GGCCAGCCGAGTGGCCATACCTATAATCCTAGTACTTTGGGAGGCCAAGGCAGGCAGATTACCTGAGGTCAGG  
AGTTCGAGACCAGCCTGGCCAACATAGTGAAACCCCATCTCTACTAAAAATACAATAAATTAGCCAGACGTGGTGG  
CATGCACCTGTAATCCAGCTACTCAAGAGGCTGAGGCAGGAGAATCACTTGAACCCAGGAGGTGGAGGTTGCG  
GTGAGCTGAGATCATGCCATTGCACTCCAGCCTGGGCAACAGAGCAAGACTCCATCTCAAAAAAAAAAAAAAAAAATTA  
GCTGGGCATGGTGGTGCACGCCTGTAATCCCAGCTACTCAGGAGGCTGAGGCAGGAGAATTGCTTGAACCCAGA  
AGGCAGAAGTTGCAGTGAGTCACGATTGTCCACTGCACTTCAGTCTGGGCAATAGAGTGAGACTCCATCTCAAA  
AACAAAAACAAAACAAAACAAGTGAATAGGGAGATGTTTTGGGGTGTGGTGGGAATACTATTTAGAATGACCAGA  
TGAGGCCAGGCATGGTGGCTCA

>hsamiR1972

TCAGGCCAGGCACAGTGGCTCA

>AANU01178229.1\_7254x6952\_RF00100\_7SK

AGGCCAGGCACAGTGGCTCATGCCTGTAATCCCAGCAATTTGGGAGGCTGAGGC

>PRR19

AGGCCAGGCATGGTGGCTCAAATCTGTAATCCTAGCACTTTGGGAGGCTGAGGC

>hsamiR1972

TCAGGCCAGGCACAGTGGCTCA

>AANU01178229.1\_7254x6952\_RF00100\_7SK

GGCCAGGCACAGTGGCTCATGCCTGTAATCCCAGCAATTTGGGAGGCTGAGGCAGGCGGATCACCTGAGGTCAG  
GAGTTCGAGACCAGCCTGGCCAACATAGTGAAACCCTGTCTCTACTAAAAATACAAGAAATTAGCCAGATGTGGT

GGCATGCACCTGTAATCCCAGCAATTCAGGAGGTTGAGGCAGGAGAAACACTTGAACCCGGGAGGCAGAGATTG  
CAGTGAG

>ADAMTSL2

GGCCAGGCGCAGTGGCTCATGCCTATAATCCCAGCAGTTTGAGAGGCTGAAGCAGGGGGATCACACGAGGTCAG  
GAGTTTGAGACCAGCATGGCCAACATGGTAAATCCTGTCTCTACTAAAAATACAAAAATTAGCTGGGCGTGGTG  
GCGGGCACCTGTAATCCCAGCTACTCGGAAGGCTGAGGCAGGAGAATTGCTTGAACCTGGGAGGTGGAGGTTGC  
AGTGAG

>hsamiR1972

TCAGGCCAGGCACAGTGGCTCA

>AANU01178229.1\_7254x6952\_RF00100\_7SK

CAGGCCAGGCACAGTGGCTCATGCCTGTAATCCCAGCAATTTGGGAGGCTGAGGCAGGCGGATCACCTGAGGTC  
AGGAGTTCGAGACCAGCCTGGCCAACATAGTGAAACCCTGTCTCTACTAAAAATACAAGAAATTAGCCAGATGTG  
GTGGCATGCACCTGTAATCCCAGCAATTCAGGAGGTTGAGGCAGGAGAAACACTTGAACCCGGGAGGCAGAGAT  
TGCAGTGAGGTGAGATTGTGCTACTGCACTCCAGCCTGGGCAACAGAG

>NCOA6

CAGGCCAGGCGCAGTGGCTCACACCTGTAATCCCAGCACTTTAGGAGGCCAAGACGGGTGGATCACTTGAGGTCA  
GGAGTTTGAGACCAGCCTGGCCAACATGATGAAACCCATCCCTACTAAAAACACAAAAATCAGCCAGGTGTGGT  
GGCAGATGCCTGTAGTCCCAGCTACTGGGAGGCTGAGGCAAGAGAATCACTTGAACCTGGGAGACGGAGGTTA  
CAATGAGCTGAGATGGCACGACTGCACTCCAGCCTGGGCGACAGAG

>hsamiR1972

TCAGGCCAGGCACAGTGGCTCA

>AANU01178229.1\_7254x6952\_RF00100\_7SK

CAGGCCAGGCACAGTGGCTCATGCCTGTAATCCCAGCAATTTGGGAGGCTGAGGCAGGCGGATCACCTGAGGTC  
AGGAGTTCGAGACCAGCCTGGCCAACATAGTGAAACCCTGTCTCTACTAAAAATACAAGAAATTAGCCAGATGTG  
GTGGCATGCACCTGTAATCCCAGCAATTCAGGAGGTTGAGGCAGGAGAAACACTTGAACCCGGGAGGCAGAGAT  
TGCAGTGAGGTGAGATTGTGCTACTGCACTCCAGCCTGGGCAACAGAGTGAGACT

>AGAP10

CAGGCCAGGCGCGGTGGCTCACGCCTGTAATCCCAGCACTTTGGGAGGCTGAGGCGGGTGGATCATCTGAGGTC  
AGGAGTTCGAGACCAGCTTCGCCTACATAGTGAAATCTCGTCTCCACTAAAAAAAAAATCACAAAAATTAGCCGGG  
CGTGGTGGCAGGCGCCTGTAATCCCAGCTACTCGGGAGGCTGAGGCAGGAGAATCCCTTGAACCCGGGAGGCAG  
AGGTTGCAGTGAGCCAAGACTGTGCCACAGCACTCCAGCCTGGGTGACAGAGTGAGACT

>hsamiR1972

TCAGGCCAGGCACAGTGGCTCA

>AANU01178229.1\_7254x6952\_RF00100\_7SK

GGCCAGGCACAGTGGCTCATGCCTGTAATCCCAGCAATTTGGGAGGCTGAGGCAGGCGGATCACCTGAGGTCAG  
GAGTTCGAGACCAGCCTGGCCAACATAGTGAAACCCTGTCTCTACTAAAAATACAAGAAATTAGCCAGATGTGGT  
GGCATGCACCTGTAATCCCAGCAATTCAGGAGGTTGAGGCAGGAGAAACACTTGAACCCGGGAGG

>MSH5

GGCCAGGCACAGTGGCTCATGCCTGTAATCCCAGCACTTTGGGAGGCTGAGGTGGGTAGATCACCTGAGGTCAG  
GAGTTCGAGATCAGCCTACCAACATGGTGAACCCCTGTCTCTACTCAAATACAAAAATTAAGTGGGCTTGGTGG  
CATGCACATGTAATCCCAGCTACTTGGGAGGCTGAGGCAGGAGAATCTCTTGAACCCGGGAGG

>hsamiR1972

TCAGGCCAGGCACAGTGGCTCA

>AANU01178229.1\_7254x6952\_RF00100\_7SK

AGGCCAGGCACAGTGGCTCATGCCTGTAATCCCAGCAATTTGGGAGGCTGAGGCAGGCCGATCACCTGAGGTCA  
GGAGTTCGAGACCAGCCTGGCCAACATAGTGAAACCCTGTCTCTACTAAAAATACAAGAAATTAG

>GNB2L1

AGGCCGGGCACGGTGGCTCACGCCTGTAATCCCAGCACTTTGGGAGGCCGAGGCCGGGCGGATCACGAGGTCAGG  
AGATCGAGACCATCCTGGCTAACACGGTGAAACCCCGTCTCTACTAAAAATACAAAAAATTAG

>hsamiR1972

TCAGGCCAGGCACAGTGGCTCA

>AANU01178229.1\_7254x6952\_RF00100\_7SK

TTAAAAATTCAGGCCAGGCACAGTGGCTCATGCCTGTAATCCCAGCAATTTGGGAGGCTGAGGCAGGCCGATCAC  
CTGAGGTGAGGAGTTCGAGACCAGCCTGGCCAACATAGTGAAACCCTGTCTCTACTAAAAATACAAGAAATTAGC  
CAGATGTGGTGGCATGCACCTGTAATCCCAGCAATTCAGGAGGTTGAGGCAGGAGAAACACTTGAACCCGGGAG  
GCAGAGATTGCAGTGAGGTGAGATTGTGCTACTGCACTCCAGCCTGGGCAACAGAGTGAGACT

>SULT1A3

T

>hsamiR1972

TCAGGCCAGGCACAGTGGCTCA

>AANU01178229.1\_7254x6952\_RF00100\_7SK

TTAAAAATTCAGGCCAGGCACAGTGGCTCATGCCTGTAATCCCAGCAATTTGGGAGGCTGAGGCAGGCCGATCAC  
CTGAGGTGAGGAGTTCGAGACCAGCCTGGCCAACATAGTGAAACCCTGTCTCTACTAAAAATACAAGAAATTAGC  
CAGATGTGGTGGCATGCACCTGTAATCCCAGCAATTCAGGAGGTTGAGGCAGGAGAAACACTTGAACCCGGGAG  
GCAGAGATTGCAGTGAGGTGAGATTGTGCTACTGCACTCCAGCCTGGGCAACAGAGTGAGACT

>SULT1A4

TTAAATATTTAGGCCGGGCACGGTGGCTCATGCCTGTAATACCAGCATTTTGGGAGGCTTAGGTGGGCAGGATCA  
CCTGAGGTGAGGAGTTTGGAGACCAGCCTGGCCAACATGGTTGAAACCCATCTCTACTAAAAATACAAAAATTAGC  
CAGGCCGCGGTGGCAGGCCGCGTGTAAATCCCAGCTACTCTGGAGGCTGAGGAAGGAGAATTGCTTGAACCAGGAG  
GCAGAGGTTGCAGTGAGCTGAGATCGCGCCACTACACTCCAGCCTGAGCGACAGAGTAAGACT

>hsamiR1972

TCAGGCCAGGCACAGTGGCTCA

>AANU01178229.1\_7254x6952\_RF00100\_7SK

GGCCAGGCACAGTGGCTCATGCCTGTAATCCCAGCAATTTGGGAGGCTGAGGCAGGCCGATCACCTGAGGTGAG  
GAGTTCGAGACCAGCCTGGCCAACATAGTGAAACCCTGTCTCTACTAAAAATACAAGAAATTAGCCAGATGTGGT  
GGCATGCACCTGTAATCCCAGCAATTCAGGAGGTTGAGGCAGGAGAAACACTTGAACCCGGGAGG

>MSH5

GGCCAGGCACAGTGGCTCATGCCTGTAATCCCAGCACTTTGGGAGGCTGAGGTGGGTAGATCACCTGAGGTGAG  
GAGTTCGAGATCAGCCTACCAACATGGTGAACCCCTGTCTCTACTCAAATACAAAAAATTAAGTGGGCTTGGTG  
GCATGCACATGTAATTCCAGCTACTTGGGAGGCTGAGGCAGGAGAATCTCTTGAACCCGGGAGG

>hsamiR1972

TCAGGCCAGGCACAGTGGCTCA

>AANU01178229.1\_7254x6952\_RF00100\_7SK

TCAGGCCAGGCACAGTGGCTCATGCCTGTAATCCCAGCAATTTGGGAGGCTGAGGCAGGCCGATCACCTGAGGTG  
AGGAGTTCGAGACCAGCCTGGCCAACATAGTGAAACCCTGTCTCTACTAAAAATACAAGAAATTAGCCAGATGTG



GTGGCATGCACCTGTAATCCCAGCAATTCAGGAGGTTGAGGCAGGAGAAACACTTGAACCCGGGAGGCAGAGAT  
TGCAGTGAGGTGAGATTGTGCTACTGCACTCCAGCCTGGGCAACAGAGTGAGAC  
>CTD-3025N20.2.1  
T

>hsamiR1972  
TCAGGCCAGGCACAGTGGCTCA  
>AANU01178229.1\_7254x6952\_RF00100\_7SK  
AGGCCAGGCACAGTGGCTCATGCCTGTAATCCCAGCAATTTGGGAGGCTGAGGCAGGCCGATCACCTGAGGTCA  
GGAGTTGAGACCAGCCTGGCCAACATAGTGAAACCCGTCTCTACTAAAAATACAAGAAATTAGCCAGATGTGG  
TGGCATGCACCTGTAATCCCAGCAATTCAGGAGGTTGAGGCAGGAGAAACACTTGAACCCGGGAGGCAGAGATT  
GCAGTGAGGTGAGATTGTGCTACTGCACTCCAGCCTGGGCAACAGAGTGAGAC  
>RP11-566K11.2.1  
AGGCCAGGTACAGTGGCTCATGCCTGTAATCCCAACACTTTGGGAGGCCGAGGCCGGTGGATCACGAAGTCAGG  
AGATCGAGACCATCCTGGCTAACATGGTGAACCCCGTCTCTACTAAAGATACAAAAAATTAGCCGGGAATGGTG  
GCGGGTGCCTGTAGTCCCAGCTACTCGGGAGGCTGAAGCAGGAGAATCACTTGAACCCAGGAGGTGGAGCTTGC  
AGTGAGCTGAGATCATGCCATTGCACTCCAGCCTGGGCGACAGAGTGAGAC

>hsamiR1972  
TCAGGCCAGGCACAGTGGCTCA  
>AANU01178229.1\_7254x6952\_RF00100\_7SK  
AGGCCAGGCACAGTGGCTCATGCCTGTAATCCCAGCAATTTGGGAGGCTGAGGCAGGCCGATCACCTGAGGTCA  
GGAGTTGAGACCAGCCTGGCCAACATAGTGAAACCCGTCTCTACTAAAAATACAAGAAATTAGCCAGATGTGG  
TGGCATGCACCTGTAATCCCAGCAATTCAGGAGGTTGAGGCAGGAGAAACACTTGAACCCGGGAGGCAGAGATT  
GCAGTGAGGTGAGATTGTGCTACTGCACTCCAGCCTGGGCAACAGAGTGAGAC  
>RP11-566K11.2.1  
GGCCGGGCACAGTGGCTCATGACTGTAATCCCAGCACTTTGGGAGGCTGACGTGGGAGGACCCAGGAGTGTAG  
ACAAAGATGCGCTTTGGAATGGAGACACAGGAGATGTGTTTTAAGATGCCTCTAGTAGGCCAGGTACAGTGGCTC  
ATGCCTGTAATCCCAACACTTTGGGAGGCCGAGGCCGGTGGATCACGAAGTCAGGAGATCGAGACCATCCTGGCT  
AACATGGTGAACCCCGTCTCTACTAAAGATACAAAAAATTAGCCGGGAATGGTGGCGGGTGCCTGTAGTCCCAG  
CTACTCGGGAGGCTGAAGCAGGAGAATCACTTGAACCCAGGAGGTGGAGCTTGCAGTGAGCTGAGATCATGCCA  
TTGCACTCCAGCCTGGGCGACAGAGTGAGAC

>hsamiR1972  
TCAGGCCAGGCACAGTGGCTCA  
>AANU01178229.1\_7254x6952\_RF00100\_7SK  
GGCCAGGCACAGTGGCTCATGCCTGTAATCCCAGCAATTTGGGAGGCTGA  
>RP11-566K11.2.1  
GGCCGGGCACAGTGGCTCATGACTGTAATCCCAGCACTTTGGGAGGCTGA

>hsamiR2054  
CTGTAATATAAATTTAATTTATT  
>EnSpm2\_SB\_EnSpm\_Sorghum\_bicolor  
TAATATAAATTTAA  
>MYLK  
TAATATAAATTTAA

>hsamiR2054  
CTGTAATATAAATTTAATTTATT  
>EnSpm2\_SB\_EnSpm\_Sorghum\_bicolor  
TTCCTGTAATATAAATTTAA  
>MYLK  
TTCTTTAATATAAATTTAA

>hsamiR2054  
CTGTAATATAAATTTAATTTATT  
>EnSpm2\_SB\_EnSpm\_Sorghum\_bicolor  
AAATTTAATTTATT  
>MORF4L2  
AAATTTAATTTATT

>hsamiR2054  
CTGTAATATAAATTTAATTTATT  
>EnSpm2\_SB\_EnSpm\_Sorghum\_bicolor  
AATATAAATTTAAT  
>NPAS3  
AATATAAATTTAAT

>hsamiR2054  
CTGTAATATAAATTTAATTTATT  
>EnSpm2\_SB\_EnSpm\_Sorghum\_bicolor  
ATATAAATTTAATTTATTC  
>AMN1  
ATTTAAATTTAATTTCTTC

>hsamiR548s  
ATGGCCAAAACACTGCAGTTATTTT  
>MADE1  
ACTGCAGTTATTTT  
>NUDT6  
ACTGCAGTTATTTT

>hsamiR548s  
ATGGCCAAAACACTGCAGTTATTTT  
>MADE1  
GGCCAAAACACTGCAG  
>SETD4  
GGCCAAAACACTGCAG

>hsamiR548s  
ATGGCCAAAACACTGCAGTTATTTT  
>MADE1  
CAAAACTGCAGTTAT  
>DMBT1  
CAAAACTGCAGTTAT

>hsamiR3134

TGATGGATAAAAAGACTACATATT

>L1PB1

GGATAAAAAGACTACATATTGGGTACA

>AC023632.1

GGATAAAAAGACTACATATTGGGTACA

>hsamiR466

ATACACATACACGCAACACACAT

>CR1\_79\_HM\_CR1\_Hydra\_magnipapillata

ACACATACACATACAC

>FAS

ACACATACACATACAC

>hsamiR3137

TCTGTAGCCTGGGAGCAATGGGGT

>GOLEM

TGGGAGCAATGGGGTGT

>CLIP3

TGGGAGCAATGGGGTGT

>hsamiR3142

AAGGCCTTTCTGAACCTTCAGA

>COPIA1-LTR\_LC

AGGCCTTTCTGAACCT

>SLC35E2

AGGCCTTTCTGAACCT

>hsamiR1273c

GGCGACAAAACGAGACCCTGTC

>AluJ

TCACGCCTCTGCACTGCAGCCTGGGCGACAAAACGAGACCCTGTCT

>ZNF687

TCACGCCACTGCACTCCAGCCTGGACAGAGCGAGACCCTGTCT

>hsamiR1273c

GGCGACAAAACGAGACCCTGTC

>AluJ

TCCCAGCACTTTGGGAGGCTGAGG

>ZNF687

CGAGACCCTGTCTCAAAAAAAAAAGAAATATAGGGGGCTGGGCATGGTGGCTCACGCCTGTAATCCCAGCACTTGGG

GAGGCAGAGG

>hsamiR3149

TTTGTATGGATATGTGTGTGTAT

>Chapaev\_8\_HM\_Chapaev\_Hydra\_magnipapillata

ATGTGTGTGTATGTGTGTGTATAACA

>KLR1

ATGTGAGTGAATGTGTGTGTATAACA

>hsamiR3149

TTTGTATGGATATGTGTGTGTAT

>Chapaev\_8\_HM\_Chapaev\_Hydra\_magnipapillata

GTGTGTGTATGTGTGTGTATAACA

>ALPL

GTGTGTGCATGTGTGTGTATAACA

>hsamiR3149

TTTGTATGGATATGTGTGTGTAT

>Chapaev\_8\_HM\_Chapaev\_Hydra\_magnipapillata

TATGTGTGTGTATGTGTGTGTATAACA

>LRRN2

TATGTGTGTGTATGTGTGTGTGTACA

>hsamiR3149

TTTGTATGGATATGTGTGTGTAT

>Chapaev\_8\_HM\_Chapaev\_Hydra\_magnipapillata

GTGTATGTGTGTGTAT

>LRRN2

GTGTATGTGTGTGTAT

>hsamiR3149

TTTGTATGGATATGTGTGTGTAT

>Chapaev\_8\_HM\_Chapaev\_Hydra\_magnipapillata

ATATGTGTGTGTATGTGTGTGT

>ST8SIA3

ATATGTGTGTGTGTGTGTGTGT

>hsamiR3149

TTTGTATGGATATGTGTGTGTAT

>Chapaev\_8\_HM\_Chapaev\_Hydra\_magnipapillata

ATATGTGTGTGTATGTGTGTGT

>PCDHB16

ATATGTGTGTGTGTGTGTGTGT

>hsamiR3150a\_3p

CTGGGGAGATCCTCGAGGTTGG

>GRANDE1\_ZD\_I

AGGCTGGGGAGATCC

>RP11-111M22.2.1

AGGCTGGGGAGATCC

>hsamiR3150a\_3p

CTGGGGAGATCCTCGAGGTTGG

>GRANDE1\_ZD\_I

AGGCTGGGGAGATCC

>RP11-111M22.2.1  
AGGCTGGGGAGATCCGTTCTGGGA

>hsamiR3164  
TGTGACTTTAAGGGAAATGGCG

>MER6B  
CTGTGACTTTAAGGG  
>UBFD1  
CTGTGACTTTAAGGG

>hsamiR3195  
CGCGCCGGGCCCGGGT  
>TguERVK1N3\_I\_ERV2\_Estrildidae  
GGCGCGGGGGGTGGCGGGGGCGGGGCGGCGGGGGGC  
>CABLES2  
GGCGCGGGGGTGGCGGGGGCCCGCGGGGGCCGGGGCCGGGCCCGGG

>hsamiR3195  
CGCGCCGGGCCCGGGT  
>TguERVK1N3\_I\_ERV2\_Estrildidae  
GGCGGCGGCGGGGGCGGCGGGGCGGGGGCGGCGG  
>GNB2  
GGCGGCGGCGGCGGCGGCGGCGGCGGCGGCGGCGGCGG

>hsamiR3195  
CGCGCCGGGCCCGGGT  
>TguERVK1N3\_I\_ERV2\_Estrildidae  
GGCGGCGGCGGGGGCGGCGGGGCGGGGGCGGCG  
>GNB2  
GGCGGCGGCGGCGGCGGCGGCGGCGGCGGCGGCGGCGG

>hsamiR3195  
CGCGCCGGGCCCGGGT  
>TguERVK1N3\_I\_ERV2\_Estrildidae  
AGCCGCCGCGCCGGGCC  
>ZNF559  
AGCCGCCGCGCCGGGCC

>hsamiR3200\_3p  
CACCTTGCCTACTCAGGTCTG  
>LTR16D2  
GCTACTCAGGTCTG  
>SKP2  
GCTACTCAGGTCTG

>hsamiR1273d  
GAACCCATGAGGTTGAGGCTGCAGT  
>AluSq

GAGACCAGCCTGGCCAACATGTTGAAACCCCATCTCTACTAAAACCACAAAAATTAACCTGGTGGTGTGTTGGGCA  
CCTGTAATCCCAGCTACTCGGTAGGCTGAGGTAGGAGAATCGCTTGAACCCATGAGGTTGAGGCTGCAGTGAGCC  
AAGATCGTGCCACTGCACTTCAGCCTGGGTGACA

>RNF4

GAGACCAACCTGGCCAACATGGTGAACCCACCTCTACTAAAAATACAAAAATTAGCCAGGCATGGTGGTGGGC  
ATCTGTAATCCCTGCCACTCAGGAGGCTGAGGCAGGAGAACCCCTTGAACCTCGGGAGGCAGAAAGTTGCAGTGAG  
CCAAGATTGCGCCATTGCACTCCAACCTGGGTGACAGACTGAGACTTTGTCTCAAAAAAAAAAAAAAAAAAGAAT  
GAATGAATGAAATTATCAAGCTCTAGGGCCAGGCATGGTGGCTCATGCCTGTAATCCCAGCACTTTGGGAAGCCA  
AGGCAGGATTGCTTGAGCCAGGAGTTCTGGACCAGCCTGGGCAACATGGTGAACCTCCTTCTACAAAATATTA  
ATACCAAAGAAAAAAAAAATTAGCAGGGTGTGGTGGCACGTGCCTGTAGTCCCAGTTACTCAGGAGGCTAAGAT  
GGGAGGATCGCTTGTGCCCTGGGAGGTTGAGGCT

>hsamiR1273d

GAACCCATGAGGTTGAGGCTGCAGT

>AluSq

AGGTTGAGGCTGCAGTGAGCCAAGATCGTGCCACTGCACTTCAGCCTGGGTGACA

>NUCB2

AGGTTTAGGCTGCAGTGAGCTGTGATTATGCCATTGCACTCCAGCCTGGGGGACA

>hsamiR1273d

GAACCCATGAGGTTGAGGCTGCAGT

>AluSq

CCTGTAATCCCAGCTACTCGGTAGGCTGAGGTAGGAGAATCGCTTGAACCCATGAGGTTGAGGCTGCAGTGAGCC  
AAGATCGTGCCACTGCACTTCAGCCTGGGTGACAAGAGCGAAACTTCATCTCAAAAAAAAAA

>AACS

CCTGTAGTCCCAGCTACTCGGGAGGCTAATGCAGGAGAATCGCTTGAACCCAGGAGGCAGAGGTTGCAGTGAAC  
CAAGATAGTGCCACTGCACTCCACCCTGGGCGACAGAGTGAGACTCCATCTCAAAAAAAAAA

>hsamiR1273d

GAACCCATGAGGTTGAGGCTGCAGT

>AluSq

GCACCTGTAATCCCAGCTACTCGGTAGGCTGAGGTAGGAGAATCGCTTGAACCCATGAGGTTGAGGCTGCAGTGA  
GCCAAGATCGTG

>AACS

GCACCTGTGGTCTAGCTACTCAGGAGGCTGAGGTGGGAGGATCACTTGAGCCTGGGAGGTGGAGGCTGCAGTA  
AGCCATGATCGTG

>hsamiR1273d

GAACCCATGAGGTTGAGGCTGCAGT

>AluSq

ACCTGTAATCCCAGCTACTCGGTAGGCTGAGGTAGGAGAATCGCTTGAACCCATGAGGTTGAGGCTGCAGTGAGC  
CAAGATCGTGCCACTGCACTTCAGCCT

>NUP50

ACCTGTAATCCCAGCTACTCCGGAGGCTGAGGCAGGAGAATCTTGAACCCAGGAGGTGGAGGTTGCAGTGAG  
CTGAGATCGCGCCAATGCACTCCAGCCT

>hsamiR1273d

GAACCCATGAGGTTGAGGCTGCAGT

>AluSq

CACCTGTAATCCCAGCTACTCGGTAGGCTGAGGTAGGAGAATCGCTTGAACCCATGAGGTTGAGGCTGCAGTGAG  
CCAAGATCGTGCCACTGCACTTCAGCCTGGGTGACA

>CENPI

CACCTGTAATCCCAGCTACTCGGGAGGCTGAGGCAGGAGAATCACTTGAACCCAGGAGGTGAAGGCTGCAGTGA  
GCAGAGATTGCACTACTGCACTCCAGCCTGGGTGACA

>hsamiR1273d

GAACCCATGAGGTTGAGGCTGCAGT

>AluSq

CCTGTAATCCCAGCTACTCGGTAGGCTGAGGTAGGAGAATCGCTTGAACCCATGAGGTTGAGGCTGCAGTGAGCC  
AAGATCGTGCCACTGCACTTCAGCCTGG

>PSMD9

CCTGTAATCCCAGCTACTTGGGAGGCTGAAGCAGGAGAATTACTTGAACCCAGGAGGTGGAGGTTGCAGTGAGC  
CGAGATCGCACCACTGCCCTCCAGCCTGG

>hsamiR1273d

GAACCCATGAGGTTGAGGCTGCAGT

>AluSq

AGCACTTTGGGAGACTGAGGTGGGCGGATCATATGAGGTCAGGAGTTTGAGACCAGCCTGGCCTACATGGTGAA  
ACCCTGTCTCTACTAATAATACAAAATTACCCGGGCGTG

>TMEM180

AGCACTTTGGGAGGCCGAGGCAGGTGGATCACCTGAGGTCAGGAGTTTGAGACCAGCCTGGCCAACATGGCGAA  
ACCCCGTCTCTACTAAAATACAAAATTAGCCGGGCGTGGTGGCGGGTGCTTGTAAATCCCATCTACTCATGAGGT  
TGAG

>hsamiR1273d

GAACCCATGAGGTTGAGGCTGCAGT

>AluSq

GAGACCAGCCTGGCCAACATGTTGAAACCCCATCTCTACTAAAACCACAAAAATTA

>TMEM180

GAGACCAGCCTGGCCAACATGGCGAAACCCCGTCTCTACTAAAATACAAAATTAGCCGGGCGTGGTGGCGGGT  
GCTTGTAAATCCCATCTACTCATGAGGTTGAG

>hsamiR1273d

GAACCCATGAGGTTGAGGCTGCAGT

>AluSq

CCTGTAATCCCAGCTACTCGGTAGGCTGAGGTAGGAGAATCGCTTGAACCCATGAGGTTGAGGCTGCAGTGAGCC  
AAGATCGTGCCACTGCACTTCAGCCTGG

>ZNF687

CCTGTAATCGCAGCTACAAAGGAGGCTGAGGCAGGAGAATCGCTTGAACCCATGAGGTTGAGGTTTCAATGAGC  
CAAGATCACGCCACTGCACTCCAGCCTGG

>hsamiR1273d

GAACCCATGAGGTTGAGGCTGCAGT

>AluSq

GTGGCTCACACCTGTAATCCTAGCACTTTGGGAGACTGAGGTGGGCGGATCATATGAGGTCAGGAGTTTGAGACC  
AGCCTGGCCTACATGGTGAAACCCTGTCTCTACTAATAATAACAAAAATTA

>ZNF687

GAACCCATGAGGTTGAGGTTTCAATGAGCCAAGATCACGCCACTGCACTCCAGCCTGGACAGAGCGAGACCCTGT  
CTCAAAAAAAGAAATATAGGGGGCTGGGCATGGTGGCTCACGCCTGTAATCCCAGCACTTGGGGAGGCAGAGG  
CGGGCGGATCACGAGGTCAGGAGATCAAGACCATCTGGCCAAGATAGTGAAACCCCGTCTCTACTAAAAATACA  
AAAATTA

>hsamiR1273d

GAACCCATGAGGTTGAGGCTGCAGT

>AluSq

GAGACCAGCCTGGCCAACATGTTGAAACCCCATCTCTACTAAAACCACAAAAATTAACCTGGTGGTGTGTTGGGCA  
CCTGTAATCCCAGCTACTCGGTAGGCTGAGGTAGGAGAATCGCTTGAACCCATGAGGTTGAGGCTGCAGTGAGCC  
AAGATCGTGCCACTGCACTTCAGCCTGGGTGACA

>AKAP6

GAGACCAGCCTGGCCAACATAGTGAAACCCCGTTTCTACCAAAAATACAAAAATTAGCCAGGCACGGTGGTGCAT  
GCCTGTAATCCCAGCTACTTGAGAGGCTGAGGCAGGAGAATCGCTTGAACCCAGGAGGTGGAGGCTGCAGTGAG  
CTGAGATCGTGCCACCGCACTCCAGCCTGGGTGACA

>hsamiR1273d

GAACCCATGAGGTTGAGGCTGCAGT

>AluSq

GCTGAGGTAGGAGAATCGCTTGAACCCATGAGGTTGAGGCTGCAGTGAGCCAAGATCGTGCCACTGCACTTCAGC  
CTGGG

>D2HGDH

GCTGAGGCAGGAGAATGGTTTGAATCCGGGAGGTGGAGGCTGCAGTGAGCCAAGATCGTGACATTGCACTCCAG  
CCTGGG

>hsamiR1273d

GAACCCATGAGGTTGAGGCTGCAGT

>AluSq

GGAGAATCGCTTGAACCCATGAGGTTGAGGCTG

>BRF1

GGAGAATCGCTTGAAGCCAGGAGGTTGAGGCTG

>hsamiR1273d

GAACCCATGAGGTTGAGGCTGCAGT

>AluSq

CTGTAATCCCAGCTACTCGGTAGGCTGAGGTAGGAGAATCGCTTGAACCCATGAGGTTGAGGCTGCAGTGAGCCA  
AGATCGTGCCACTGCACTTCAGCCTGGGTGACA

>BRF1

CTGTAGTCCCAGCTACTTGGGAGGCTGAGGTAGGAGGATTGCTTGAAGCCAGAAAGTTGAGGCTGCAGTGAGCT  
GAGATCACACCACTCCACTCCAGCCTGGGCGACA

>hsamiR1273d

GAACCCATGAGGTTGAGGCTGCAGT

>AluSq



CAGCTACTCGGTAGGCTGAGGTAGGAGAATCGCTTGAACCCATGAGGTTGAGGCTGCAGTGAG  
>BRF1

CAGCTACTTGGGAGGCTGAGGCAGGAGAATCGCTTGAACCCAGGTGACTGAGGCTGCAGTGAG

>hsamiR1273d

GAACCCATGAGGTTGAGGCTGCAGT

>AluSq

GCTTGAACCCATGAGGTTGAGGCTGCAGTGAGCCAAGATCGTGCCACTGCACTTCAGCCTGGGTGACA

>NCOA6

GCTTGAAGCCAGGAGGTTGAGGCTGCAGTGAGCCGAGATCGCACCACTGCACTCCAGCCTCGGTGACA

>hsamiR1273d

GAACCCATGAGGTTGAGGCTGCAGT

>AluSq

AGGTTGAGGCTGCAGTGAGCCAAGATCGTGCCACTGCACTTCAGCC

>AGAP10

AGGTTGTGGCTGCAGTGAGCCGTGATCACGTCACTGCACTCCAGCC

>hsamiR1273d

GAACCCATGAGGTTGAGGCTGCAGT

>AluSq

GTGGCTCACACCTGTAATCCTAGCACTTTGGGAGACTGAGGTGGGCGGATCATATGAGGTCAGGAGTTTGAGACC

AGCCTGGCCTACATGGTGAAACCCTGTCTCTACTAATAATAACAAAA

>LTB4R

GTGGTTCATACCGGTAATCCCAGCACTTTGGGAGGCTGAGGGGAGCAGATCACTTGATGTTAGCAGTTTGAGACC

AGCCTGGCCAACATGGTGAAACCCCGTCTCTACTAAAAATACAAAAGATAGCTGGGTGTAGTGGCATGTGCCTGT

AGTCTCAGCTACTTGGGAGGCTGAGGCAGGAGAATCATGTGAACCCAGGAAGTGGAGGCTGCAGT

>hsamiR1273d

GAACCCATGAGGTTGAGGCTGCAGT

>AluSq

CCTGTAATCCCAGCTACTCGGTAGGCTGAGGTAGGAGAATCGCTTGAACCCATGAGGTTGAGGCTGCAGTGAGCC

AAGATCGTGCCACTGCACTTCAGCCTGGGTGACAAGAGCGAAACTTCATCTCAAAAAAAAAA

>LTB4R

CCTGTAGTCTCAGCTACTTGGGAGGCTGAGGCAGGAGAATCATGTGAACCCAGGAAGTGGAGGCTGCAGTGAGC

TGAGATCGCACCACTGCACTCCAGCCTGAATGACAGAGCGAGACTCCATCTCAAAAAAAAAA

>hsamiR1273d

GAACCCATGAGGTTGAGGCTGCAGT

>AluSq

ACCCATGAGGTTGAGGCTGCAGTGAGC

>AC010336.2

ACCCAGGAGGTTGAGGCTGCAGTGAGC

>hsamiR1273d

GAACCCATGAGGTTGAGGCTGCAGT

>AluSq

TGGGCACCTGTAATCCCAGCTACTCGGTAGGCTGAGGTAGGAGAATCGCTTGAACCCATGAGGTTGAGGCTGCAG  
TGAGCCAAGATCGTGCCACTGCACTTCAGCCTGGGTGACAA

>AC017104.2.1

TGGGCGCCTGTAATCCCAGCTACTTGAGAGGCTGAGGCAGGAGAATTGCTTGAACCCAGGAGGCAGAGGCTGCA  
GTGAGCCGAGATCGCGCCATCGCACTCCAGCCTGGGCGACAA

>hsamiR1972

TCAGGCCAGGCACAGTGGCTCA

>AANU01178229.1\_7254x6952\_RF00100\_7SK

CCTGTAATCCCAGCGATTTGGGAGGCTGAGGCAGGCGGACCACCTGAGGTCAGGAGTTCGAGACCAGCCTGGCC  
AACATAGTGAACCCTGTCTCTACTAAAAATACAAGAAATTAGCCAGATGTGGTGGCACGCAGCTGTAATCCCAGC  
AATTCAGGAGGTTGAGGCAGGAGAAACACTTGAACCCGGGAGGCAGAGATTGCAGTGAGGTGAGATTGTGCTAC  
TGCACTCCAGCCTGGGCAACAGAGTGAGACTC

>AACS

CCTGTAATCCCAGCACTTTGGGAGGCTGAGGTGGGCGGATCATGAGGTCAGGAGTTCAGACCAGCCTGACCAAC  
ATGGTGAAATCCCATCTCTACTAAAAATACAAAAATTACCCAGGCATGGTGGCACGTGCCTGTAGTCCCAGCTACT  
CGGGAGGCTAATGCAGGAGAATCGCTTGAACCCAGGAGGCAGAGGTTGCAGTGAACCAAGATAGTGCCACTGCA  
CTCCACCCTGGGCGACAGAGTGAGACTC

>hsamiR1972

TCAGGCCAGGCACAGTGGCTCA

>AANU01178229.1\_7254x6952\_RF00100\_7SK

CAGGCCAGGCACAGTGGCTCATGCCTGTAATCCCAGCGATTTGGGAGGCTGAGGCAGGCGGACCACCTGAGGTC  
AGGAGTTCGAGACCAGCCTGGCCAACATAGTGAACCCTGTCTCTACTAAAAATA

>AACS

CAGGCCAGGCACGGTGGCTCATGCCTGTAATCCCATCATTTTGGGAGGCCAAGGTGGGAGAATCACTTGAGGTTA  
GGAGTTCAGAACAGCCTGGGCAACATGGTGGAACCCCGTCTCTACAAAAATA

>hsamiR1972

TCAGGCCAGGCACAGTGGCTCA

>AANU01178229.1\_7254x6952\_RF00100\_7SK

GGCCAGGCACAGTGGCTCATGCCTGTAATCCCAGCGATTTGGGAGGCTGAGGCAGGCGGACCACCTGAGGTCAG  
GAGTTCGAGACCAGCCTGGCCAACATAGTGAACCCTGTCTCTACTAAAAATA

>AACS

GGCCAGACACAGTGGCTCACACCTGTAATCCCAGCATTTCGGGAGGCCAAGGTGGGTGGATCACCTGAGGTCAG  
GAGCTCGAGACCAGCCTGACCAACACGGTGAAATCTCATCTCTACTAAAAATA

>hsamiR1972

TCAGGCCAGGCACAGTGGCTCA

>AANU01178229.1\_7254x6952\_RF00100\_7SK

TTCAGGCCAGGCACAGTGGCTCATGCCTGTAATCCCAGCGATTTGGGAGGCTGAGGCAGGCGGACCACCTGAGG  
TCAGGAGTTCGAGACCAGCCTGGCCAACATAGTGAACCCTGTCTCTACTAAAAATACAAGAAATTAGCCAGATGT  
GGTGGCACGCAGCTGTAATCCCAGCAATTCAGGAGGTTGAGGCAGGAGAAACACTTGAACCCGGGAGGCAGAGA  
TTGCAGTGAGGTGAGATTGTGCTACTGCACTCCAGCCTGGGCAACAGAGTGAGACTC

>SLC24A6

TTCAGGCCGGGCACGGTGGCTCACCGCCTGTAATCGCAGCACTTTGGGAGGCCGAGGCGGGCAGATCACCTGAG  
GTCAGGAGTTCGAGACCAACTTGGCCAACATGGTGAAACCTTGTCTCTACTAAAAATACAAAAATTAGTCAGGCTG

GTGTCACACACCTGTAATCCCAGCTACTCGAGAGGCTGAGGTGGGAGAATCGCTTGAACCCGGGAGGCAGAAGT  
TGCAGTGAGCCTAGATCATGCCAGTGTACTCTAGCCTGGGCGACTGAGTGAGACTC

>hsamiR1972

TCAGGCCAGGCACAGTGGCTCA

>AANU01178229.1\_7254x6952\_RF00100\_7SK

GCCAGGCACAGTGGCTCATGCCTGTAATCCCAGCGATTTGGGAGGCTGAGGCAGGCGGACCACCTGAGGTCAGG  
AGTTCGAGACCAGCCTGGCCAACATAGTGAAACCCTGTCTCTACT

>EIF3E

GCCAGGCGCAGTGGCTCACGCCTGTAATCCCAGCACTTTGGGAGGCCGAGGCAGGCGGATCACGAGGTCAGGAG  
ATCGAGACCATCCTGGCTAACACGGTGAAACCCTGTCTCTACT

>hsamiR1972

TCAGGCCAGGCACAGTGGCTCA

>AANU01178229.1\_7254x6952\_RF00100\_7SK

GCCAGGCACAGTGGCTCATGCCTGTAATCCCAGCGATTTGGGAGGCTGAGGCAGGCGGACCACCTGAGGTCAGG  
AGTTCGAGACCAGCCTGGCCAACATAGTGAAACCCTGTCTCTACTAAAAATACAAGAAATTAGCCAGATGTGGTG  
GCACGCAGCTGTAATCCCAGCAATTCAGGAGGTTGAGGCAGGAGAAACACTTGAACCCGGGAGGCAGAGATTGC  
AGTGAGGTGAGATTGTGCTACTGCACTCCAGCCTGG

>AKT2

GCCAGGCGCAGTGGCTCATGCCTATAATCCCAGCACTTTGGGAGGCTGAGGCAGGATGGATCACAAAGGTCAGGAG  
TTCGAGACCAGCCTGGCCAACATGGTGAAACCCGCTCTACTAAAAATACAAAATTAGTCAGGGGTGGCATTCC  
CCTAATCCCAGCTACTCAGGAGGCTGAGGCAGGAGAATTGCTTGAACCCGGGAGGCCGAGGGTGCAGTGAGCAG  
AGATCGCACCACTGCACTCCAGCCTGG

>hsamiR1972

TCAGGCCAGGCACAGTGGCTCA

>AANU01178229.1\_7254x6952\_RF00100\_7SK

GGCCAGGCACAGTGGCTCATGCCTGTAATCCCAGCGATTTGGGAGGCTGAGGCAGGCGGACCACCTGAGGTCAG  
GAGTTCGAGACCAGCCTGGCCAACATAGTGAAACCCTGTCTCTACTAAAAATACAAGAAATTAGCCAGATGTGGT  
GGCACGCAGCTGTAATCCCAGCAATTCAGGAGGTTGAGGCAGGAGAAACACTTGAACCCGGGAGGCAGAGATTG  
CAGTGAGGTGAGATTGTGCTACTGCACTCCAGCCTGGGCAACAGAGTGAGACTC

>FAM54B

GGCCAGGCGCAGTGGCTCACATCTGTAATCCCAGCACTTTGGGAGGCCGAGGTGGGCGGATCACGAGGTCAGGA  
GAGCGAGACCATCCTGGCTAACACAGTGAAGCCCTGTCTCTACTAAAAATACAAAAAATTAGCCAGGTGTGGTGG  
CGGGCACCTGTAGTACCAGCTACTTGGGAGGCTGAGGCAGGAGAATGGCGTGAACCCAGGAGGCAGAGCTTGCA  
GTGAGCCGAGATCACGCCACTGCACTCCAACCTGGGTGACAGAGCGAGACTC

>hsamiR1972

TCAGGCCAGGCACAGTGGCTCA

>AANU01178229.1\_7254x6952\_RF00100\_7SK

AGGCCAGGCACAGTGGCTCATGCCTGTAATCCCAGCGATTTGGGAGGC

>GPR172B

AGGCCAGGCACCGTGGCTCAGGCCTGTAATCCCAGCACTTTGGGAGGC

>hsamiR1972

TCAGGCCAGGCACAGTGGCTCA

>AANU01178229.1\_7254x6952\_RF00100\_7SK

GGCACAGTGGCTCATGCCTGTAATCCCAGCGATTTGGGAGGCTGAGGCAGGCGGACCACCTGAGGTCAGGAGTT  
CGAGACCAGCCTGGCCAACATAGTGAAACCCTGTCTCTACTAAAAATACAAGAAATTAGCCAGATGTGGTGGCAC  
GCAGCTGTAATCCCAGCAATTCAGGAGGTTGAGGCAGGAGAAACACTTGAACCCGGGAGGCAGAGATTGCAGTG  
AGGTGAGATTGTGCTACTGCACTCCAGCCTGGGCAACAGAGTGAGACTC

>C14orf79

GGCACAGTGGCTCACGCCTGTAATCCCAGCACTTTGGGAGGCTGAGGCTGACAGATCAGGAGGTCAGGAGTTCA  
AGATCTGCCTGGCCAACATAGTGAAACCCCGTCTCTACTAAAAATACAAAAAATAGCCGGCGTGGTGTATGGGC  
GCCTGTCATCCCAGCTACTGGGGAGGCTGAGGCAGGAGAATCGCTTGAACCCGGGAGGCGGAGGTTGCAGGGA  
GCGGAGATCGCGCCACTGCACTCCAGCCTGGGGGACAGAGTGAGACTC

>hsamiR1972

TCAGGCCAGGCACAGTGGCTCA

>AANU01178229.1\_7254x6952\_RF00100\_7SK

CAGGCCAGGCACAGTGGCTCATGCCTGTAATCCCAGCGATTTGGGAGGCTGAGGCAGGCGGACCACCTGAGGTC  
AGGAGTTCGAGACCAGCCTGGCCAACATAGTGAAACCCTGTCTCTACTAAAAATACAAGAAATTAGCCAGATGTG  
GTGGC

>CNTN4

CAGGCCGGGCACGGTGGCTCACGCCTGTCATCCCAGCACTTTGGGAGGCCGAGGCGGGCGGATCACGAGGTCAG  
GAGATCGAGACCATCCTGGCTAACACGGTGAAACCCCGTCTCTACTAAAAATACAAAAAATTAGCCAGGCGTGGTG  
GC

>hsamiR1972

TCAGGCCAGGCACAGTGGCTCA

>AANU01178229.1\_7254x6952\_RF00100\_7SK

CAGGCCAGGCACAGTGGCTCATGCCTGTAATCCCAGCGATTTGGGAGGCTGAGGCAGGCGGACCACCTGAGGTC  
AGGAGTTCGAGACCAGCCTGGCCAACATAGTGAAACCCTGTCTCTACTAAAAATACAAGAAATTAGCCAGATGTG  
GTGGCACGCAGCTGTAATCCCAGCAATTCAGGAGGTTGAGGCAGGAGAAACACTTGAACCCGGGAGGCAG

>SLC25A45

CAGGCCAGGCGCAGTGGCTCACGCCTGTAATCCCAGCACTTTGGGAGGCCGAGGCGGAAGGACCACCTGAGGTC  
AGGAGTTCGAGACCAGCCTGACCAACATAGTGAAACCCCATCTCTACAAAAATACAAAAAATTAGCCGGGTGTGA  
TGACGGGCGCCTGTAGTCCCAGCTACTTGGGATGCTGAGGCAGGAGAATCGCTTGAACCCGAGAGGCAG

>hsamiR1972

TCAGGCCAGGCACAGTGGCTCA

>AANU01178229.1\_7254x6952\_RF00100\_7SK

AGGCCAGGCACAGTGGCTCATGCCTGTAATCCCAGCGATTTGGGAGGCTGAGGCAGGCGGACCACCTGAGGTC  
GGAGTTCGAGACCAGCCTGGCCAACATAGTGAAACCCTGTCTCTACTAAAAATACAAGAAATTAGCCAGATGTGG  
TGGCACGCAGCTGTAATCCCAGCAATTCAGGAGGTTGAGGCAGGAGAA

>NLRP3

AGGCCGGGCACAGTGGCTCACGCCTGTAATCCCAGCACTTTGAGAGGCCAAGGCAGGCAGATCACCTGAGCTGA  
GGAATCAAGACCAGCCTGGCCAACATGGCAAACTGTGTCTCTACTAAAAGTACAAAAATGAGCCGGGTGTGGT  
GGCGGGCGCCTGTAATCCCAGCTACTCAGGAAGTTGAGGTAGGAGAA

>hsamiR1972

TCAGGCCAGGCACAGTGGCTCA

>AANU01178229.1\_7254x6952\_RF00100\_7SK

AGGCCAGGCACAGTGGCTCATGCCTGTAATCCCAGCGATTTGGGAGGCTGAGGCAGGCGGACCACCTGAGGTCA  
GGAGTTCGAGACCAGCCTGGCCAACATAGTGAAACCCTGTCTCTACTAAAAATACAAGAAATTAGCCAGATGTGG  
TGGCACGCAGCTGTAATCCCAGCAATTCAGGAGGTTGAGGCAGGAGAA

>NLRP3

CAAGTCAAAATCTTTAATTTTAAAAAGTTAGCCAAGGCCGGGCACAGTGGCTCACGCCTGTAATCCCAGCACTTTG  
AGAGGCCAAGGCAGGCAGATCACCTGAGCTGAGGAATTCAAGACCAGCCTGGCCAACATGGCAAACTGTGTCT  
CTACTAAAAGTACAAAAATGAGCCGGGTGTGGTGGCGGGCGCCTGTAATCCCAGCTACTCAGGAAGTTGAGGTA  
GGAGAA

>hsamiR1972

TCAGGCCAGGCACAGTGGCTCA

>AANU01178229.1\_7254x6952\_RF00100\_7SK

GGCCAGGCACAGTGGCTCATGCCTGTAATCCCAGCGATTTGGGAGGCTGAGGCAGGCGGACCACCTGAGGTGAG  
GAGTTCGAGACCAGCCTGGCCAACATAGTGAAACCCTGTCTCTACTAAAAATACAAGAAATTAGCCAGATGTGGT  
GGCACGCAGCTGTAATCCCAGCAATTCAGGAGGTTGAGGCAGGAGAAACACTTGAACCCGGGAGGCAGAGATTG  
CAGTGAGGTGAGATTGTGCTACTGCACTCCAGCC

>STRBP

GGCCAGTCACAGTGGCTCATACTGTAATTCCAGCACTTTAGGAGCCAAGGCCGGGTGGATCACCTGAGGTCAGGA  
GTTTCGAGACCAGCCTGGCCAACATGGTGAACCCCGACGCTACTAAAAATACAAAATTAGCCAGGCATGGTGGT  
GCGCACCTGTAGTCCCAGCTACTCAGGAAGCCGAGGCAGAAATTGCTTGAACCTGGGAGGCGGAGATTGCAGTGA  
GCCGAGATTGCGCCACTGACTCCAGCC

>hsamiR1972

TCAGGCCAGGCACAGTGGCTCA

>AANU01178229.1\_7254x6952\_RF00100\_7SK

CAGGCACAGTGGCTCATGCCTGTAATCCCAGCGATTTGGGAGGCTGAGGCAGGCGGACCACCTGAGGTCAGGAG  
TTCGAGACCAGCCTGGCCAACATAGTGAAACCCTGTCTCTACTAAAAATACAAGAAATTAGCCAGATGTGGTGGCA  
CGCAGCTGTAATCCCAGCAATTCAGGAGGTTGAGGCAGGAGAAACACTTGAACCCGGGAGGCAGAGATTGCAGT  
GAGGTGAGATTGTGCTACTGCACTCCAGCCTGGGCAA

>TMEM130

CAGGCACGGTGGCTCATGCCTGTAATTCCAGCACTTTGGGAGGCCGAGGTGGGTGGATCACCTGAGGTCAGGCG  
TTTGAGACCGCCTGGCCAACATGGCGAAACCCCGTCTCTACTAACAATACAAAATTAGCCGGGTGTGGTGGCGA  
ACGCCTGTAATCTCAGCTACTCGGGAGGCTGAGGCCGGAGAATTACTTGAACCTGGGAGATGGTGGTTGCCGTGA  
GCCGAGATTGCGCCACTGCACTCCAGCCTGGGCAA

>hsamiR1972

TCAGGCCAGGCACAGTGGCTCA

>AANU01178229.1\_7254x6952\_RF00100\_7SK

CAGGCCAGGCACAGTGGCTCATGCCTGTAATCCCAGCGATTTGGGAGGCTGAGGCAGGCGGACCACCTGAGGTC  
AGGAGTTCGAGACCAGCCTGGCCAACATAGTGAAACCCTGTCTCTACTAAAAATACAAGAAATTAGCCAGATGTG  
GTGGCACGCAGCTGTAATCCCAGCAATTCAGGAGGTTGAGGCAGGAGAAACACTTGAACCCGGGAGGCAGAGAT  
TGCAGTGAGGTGAGATTGTGCTACTGCACTCCAGCCTGGGCAACAGAGTGAGACTC

>DDB1

CAGGCCAGGCACAGTGGCTCACGCTTGAATTCCAGCACTTCGGGAGGCCGAGGCAGGCAGATCACAAGGGCAA  
GAGTTCGAGACCAGGCTGGCCAACACAGTGAAACCCCATCTGTACTAAAAATACAAAATTAGCTGGGCATGGTG

GCACGCGCCTGTAATCCCAACTACTCAGGAGGCTGGGCCAGGAGAATCGCTTGAACCTGGGAGGTAGAGGTTGC  
AGTGAGCCGAGATCGTGCCACTGCACTCCAGCCTGGACGACAGGGTGAGACTC

>hsamiR1972

TCAGGCCAGGCACAGTGGCTCA

>AANU01178229.1\_7254x6952\_RF00100\_7SK

AGGCCAGGCACAGTGGCTCATGCCTGTAATCCCAGCGATTTGGGAGGCTGAGGCAGGCGGACCACCTGAGGTCA  
GGAGTTCGAGACCAGCCTGGCCAACATAGTGAAACCCTGTCTCTACTAAAAATACAAGAAATTAGCC

>HARS

AGGCCAGGCACAGTGGCTCACGCCTGTAATCCCAGCACTTCGGGAGGCCAAGGCAGATGGATTGCCTGAGGTCA  
GGGGTTCGAGACCAGCCTGGCCAACATGGTGAAACCCTGTCTCTACTAAAAATACAGAAATTAGCC

>hsamiR1972

TCAGGCCAGGCACAGTGGCTCA

>AANU01178229.1\_7254x6952\_RF00100\_7SK

CCAGGCACAGTGGCTCATGCCTGTAATCCCAGC

>ADCY6

CCAGGCACAGTGGCTTACACCTGTAATCCCAGC

>hsamiR1972

TCAGGCCAGGCACAGTGGCTCA

>AANU01178229.1\_7254x6952\_RF00100\_7SK

GGCACAGTGGCTCATGCCTGTAATCCCAGCGATTTGGGAGGCTGAGGCAGGCGGACCACCTGAGGTCAGGAGTT  
CGAGACCAGCCTGGCCAACATAGTGAAACCCTGTCTCTACTAAAAATACAAGAAATTAGCCAGATGTGGTGGCAC  
GCAGCTGTAATCCCAGCAATTCAGGAGGTTGAGGCAGGAGAAACACTTGAACCCGGGAGGCAGAGATTGCAGTG  
AGGTGAGATTGTGCTACTGCACTCCAGCCTGGGCAACAGAGTGAGACTC

>LRRC37A

GGCACAGTGGCTCATGCCTGTAATCCCAGCACTTTGGGACGCCAAGGTGGGTGGATCACTTGAGCTCAGGAGTTC  
AAGACCAGCCTGGCCAACATGATGAAACCCCATCTCTACTAAAAATACAAAAATTAGCTGAGTGTGGTGACGCGT  
GTCTATAATCCCAGCTACTCAGGAGGCTGAGGTAGGAGAATCACTTGAACCTGGGAGGTGGAGGTTGCAATGAG  
CTGGGATCATACTGCACTCCAGCCTGGACAACAGAGCGAGACTC

>hsamiR1972

TCAGGCCAGGCACAGTGGCTCA

>AANU01178229.1\_7254x6952\_RF00100\_7SK

GGCCAGGCACAGTGGCTCATGCCTGTAATCCCAGCGATTTGGGAGGCTGAGGCAGGCGGACCACCTGAGGTCAG  
GAGTTCGAGACCAGCCTGGCCAACATAGTGAAACCCTGTCTCTACTAAAAATACAAGAAATTAGCCAGATGTGGT  
GGCACGCAGCTGTAATCCCAGCAATTCAGGAGGTTGAGGCAGGAGAAACACTTGAACCCGGGAGG

>D2HGDH

GGCCGGGCACAGTGGCTCACACCTGTAATCCCAGCACTTTGGGAGGCTGAGGTGGGTGGATCACCTGAGGTCAC  
GAGTTCGAGACCAGCCTGGACAACACGGCAAAACCCTGTCTGTACTAAAAATACAAAAATTAGCTGAGTGTGGTG  
GCAGGTGCCCGTAATCCCAGCTACTCAGGAGGCTGAGGCAGGAGAATTGTTTGAACCCGGGAGG

>hsamiR1972

TCAGGCCAGGCACAGTGGCTCA

>AANU01178229.1\_7254x6952\_RF00100\_7SK

GCCAGGCACAGTGGCTCATGCCTGTAATCCCAGCGATTTGGGAGGCTGAGGCAGGCGGACCACCTGAGGTCAGG  
AGTTTCGAGACCAGCCTGGCCAACATAGTGAAACCCTGTCTCTACTAAAAATACAAGAAATTAGCCAGATGTGGTG  
GCACGCAGCTGTAATCCCAGCAATTCAGGAGGTTGAGGCAGGAGAAACACTTGAACCCGGGAGGCAGAGATTGC  
AGTGAGGTGAGATTGTGCTACTGCACTCCAGCCTGGGCAACAGA

>BRF1

GCCAGGCACAGTGGCTCACGCCTGTAATCCCAGCACTTTGGGAGGTCGAGGCGGGCGGATCATGAGGTCAGGAG  
ATCAAGACCATCCTGGCTAACACGGTCAAACCCCTGTCTAATAAAAAATACAAAAAATTAGCCAGGCGTGGTGGC  
AGGCGCCTGTAGTCCCCCTACTCAGGAGGCTGAGGCAGGAGAATGGCATGAACCCGGGAGGCAGAGCTTGCGAG  
TGAGCTGAGATGGCACCCTGCACTCCAGCCTGGGCGACAGA

>hsamiR1972

TCAGGCCAGGCACAGTGGCTCA

>AANU01178229.1\_7254x6952\_RF00100\_7SK

AGGCCAGGCACAGTGGCTCATGCCTGTAATCCCAGCGATTTGGGAGGCTGAGG

>BRF1

AGGCCGGGCACAGTGGCTCACACCTGTTATCCCAGCACTTTGGGAGGCTGAGG

>hsamiR1972

TCAGGCCAGGCACAGTGGCTCA

>AANU01178229.1\_7254x6952\_RF00100\_7SK

CAGGCCAGGCACAGTGGCTCATGCCTGTAATCCCAGCGATTTGGGAGGCTGAGGCAGGCGGACCACCTGAGGTC

AGGAGTTTCGAGACCAGCCTGGCCAACATAGTGAAACCCTGTCTCTACTAAAAAT

>BRF1

CAGGCCAGGACAGTGGCTCACGCCTGTCATCCCAGCACTTTGGGAGGCTGAGGTTGGGAGGATAGCTTGAGCCCA

GGAGTTTCGAGACCAGCCTGGGCAACAAAGTGAGATCCCTGTCTCTACAAAAAAT

>hsamiR1972

TCAGGCCAGGCACAGTGGCTCA

>AANU01178229.1\_7254x6952\_RF00100\_7SK

GGCACAGTGGCTCATGCCTGTAATCCCAGCGATTTGGGAGGCTGAGGCAGGCGGACCACCTGAGGTCAGGAGTT

CGAGACCAGCCTGGCCAACATAGTGAAACCCTGTCTCTACTAAAAATACAAGAAATTAGCCAGATGTGGT

>BRF1

GGCACAGTGGCTCACATCTGTGATCTCAGCACTTTGGGAGGCTGAGGAGGGAGGATTGCTTGAGTCCAGGAGTTT

GAGACCAGCCTAAGCAACATGGCAAAACCCTGACTCTACAAAAACTACAAAAACTTAGCCGGTTGTGGT

>hsamiR1972

TCAGGCCAGGCACAGTGGCTCA

>AANU01178229.1\_7254x6952\_RF00100\_7SK

AATTCAGGCCAGGCACAGTGGCTCATGCCTGTAATCCCAGCGATTTGGGAGGCTGAGGCAGGCGGACCACCTGA

GGTCAGGAGTTTCGAGACCAGCCTGGCCAACATAGTGAAACCCTGTCT

>CDK10

AATTGAGGCCAGGCACAGTGGCTCATGTGTGCAATCCCAGCACTTTGGGAGACCAAGCAGGGCGGATAACTTGA

GGTCAGGAGTTTTCGAGACCTCCCTGGCTAACATGGCAAAACCCTGTCT

>hsamiR1972

TCAGGCCAGGCACAGTGGCTCA

>AANU01178229.1\_7254x6952\_RF00100\_7SK

GCACAGTGGCTCATGCCTGTAATCCCAGCGATTTGGGAGGCTGAGGCAGGCGGACCACCTGAGGTCAGGAGTTC  
GAGACCAGCCTGGCCAACATAGTGAAACCCTGTCTCTACTAAAAATACAAGAAATTAGCCAGATGTGGTGGCAGC  
CAGCTGTAATCCCAGCAATTCAGGAGGTTGAGGCAGGAGAAACACTTGAACCCGGGAGGCAGAGATTGCAGTGA  
G

>BACE1

GCACAGTGGCTCACAACCTGTAATCCCAACACTTTGAGAGGCTAAGGCGGGTGGATCACTTGAGGTCAGGAGTTC  
AGACCAGCCTGGTGAATGTAGTAAAATCCCATCTCTACTAAAAATACAAAGATTAGCCGGGTGTGGTGACGCACG  
CCTATAATCCCAGCTACTTGGGAGGCTGAGGCAGGAGAATCACTTGAACCCAGGAGGCGGAGGTTGCAGTGAG

>hsamiR1972

TCAGGCCAGGCACAGTGGCTCA

>AANU01178229.1\_7254x6952\_RF00100\_7SK

GGCCAGGCACAGTGGCTCATGCCTGTAATCCCAGCGATTTGGGAGGCTGAGGCAGGCGGACCACCTGAGGTCAG  
GAGTTCGAGACCAGCCTGGCCAACATAGTGAAACCCTGTCTCTACTAAAAATACAAGAAATTAGCCAGATGTGGT  
GGCAGCAGCTGTAATCCCAGCAATTCAGGAGGTTGAGGCAGGAGAAACACTTGAACCCGGGAGGCAGAGATTG  
CAGTGAGGTGAGATTGTGCTACTGCACTCCAGCCTGGGCAACAGAG

>PRR19

GGCCAGCCGAGTGGCCATACCTATAATCCTAGTACTTTGGGAGGCCAAGGCAGGCAGATTACCTGAGGTCAGG  
AGTTCGAGACCAGCCTGGCCAACATAGTGAAACCCATCTCTACTAAAAATACAAAATAGCCAGACGTGGTGG  
CATGCACCTGTAATTCAGCTACTCAAGAGGCTGAGGCAGGAGAATCACTTGAACCCAGGAGGTGGAGGTTGCG  
GTGAGCTGAGATCATGCCATTGCACTCCAGCCTGGGCAACAGAGCAAGACTCCATCTCAAAAAAAAAAAAAATTA  
GCTGGGCATGGTGGTGCACGCCTGTAATCCCAGCTACTCAGGAGGCTGAGGCAGGAGAATTGCTTGAACCCAGA  
AGGCAGAAGTTGCAGTGAGTCACGATTGTGCCACTGCACTTCAGTCTGGGCAATAGAGTGAGACTCCATCTCAA  
AACAAAACAAAACAAAACAAGTGAATAGGGAGATGTTTTGGGGTGTGGTGGGAATACTATTTAGAATGACCAGA  
TGAGGCCAGGCATGGTGGCTCA

>hsamiR1972

TCAGGCCAGGCACAGTGGCTCA

>AANU01178229.1\_7254x6952\_RF00100\_7SK

AGGCCAGGCACAGTGGCTCATGCCTGTAATCCCAGCGATTTGGGAGGCTGAGGC

>PRR19

AGGCCAGGCATGGTGGCTCAAATCTGTAATCCTAGCACTTTGGGAGGCTGAGGC

>hsamiR1972

TCAGGCCAGGCACAGTGGCTCA

>AANU01178229.1\_7254x6952\_RF00100\_7SK

GGCCAGGCACAGTGGCTCATGCCTGTAATCCCAGCGATTTGGGAGGCTGAGGCAGGCGGACCACCTGAGGTCAG  
GAGTTCGAGACCAGCCTGGCCAACATAGTGAAACCCTGTCTCTACTAAAAATACAAGAAATTAGCCAGATGTGGT  
GGCAGCAGCTGTAATCCCAGCAATTCAGGAGGTTGAGGCAGGAGAAACACTTGAACCCGGGAGGCAGAGATTG  
CAGTGAG

>ADAMTSL2

GGCCAGGCGCAGTGGCTCATGCCTATAATCCCAGCAGTTTGGAGAGGCTGAAGCAGGGGGATCACACGAGGTCAG  
GAGTTTGAGACCAGCATGGCCAACATGGTAAAATCCTGTCTCTACTAAAAATACAAAATAGCTGGGCGTGGTG  
GCGGGCACCTGTAATCCCAGCTACTCGGAAGGCTGAGGCAGGAGAATTGCTTGAACCTGGGAGGTGGAGGTTGC  
AGTGAG



>hsamiR1972

TCAGGCCAGGCACAGTGGCTCA

>AANU01178229.1\_7254x6952\_RF00100\_7SK

CAGGCCAGGCACAGTGGCTCATGCCTGTAATCCCAGCGATTTGGGAGGCTGAGGCAGGCGGACCACCTGAGGTC  
AGGAGTTCGAGACCAGCCTGGCCAACATAGTGAAACCCTGTCTCTACTAAAAATACAAGAAATTAGCCAGATGTG  
GTGGCACGCAGCTGTAATCCCAGCAATTCAGGAGGTTGAGGCAGGAGAAACACTTGAACCCGGGAGGCAGAGAT  
TGCAGTGAGGTGAGATTGTGCTACTGCACTCCAGCCTGGGCAACAGAG

>NCOA6

CAGGCCAGGCGCAGTGGCTCACACCTGTAATCCCAGCACTTTAGGAGGCCAAGACGGGTGGATCACTTGAGGTCA  
GGAGTTTGAGACCAGCCTGGCCAACATGATGAAACCCATCCCTACTAAAAACACAAAAATCAGCCAGGTGTGGT  
GGCAGATGCCTGTAGTCCCAGCTACTTGGGAGGCTGAGGCAAGAGAATCACTTGAACCTGGGAGACGGAGGTTA  
CAATGAGCTGAGATGGCACGACTGCACTCCAGCCTGGGCGACAGAG

>hsamiR1972

TCAGGCCAGGCACAGTGGCTCA

>AANU01178229.1\_7254x6952\_RF00100\_7SK

CAGGCCAGGCACAGTGGCTCATGCCTGTAATCCCAGCGATTTGGGAGGCTGAGGCAGGCGGACCACCTGAGGTC  
AGGAGTTCGAGACCAGCCTGGCCAACATAGTGAAACCCTGTCTCTACTAAAAATACAAGAAATTAGCCAGATGTG  
GTGGCACGCAGCTGTAATCCCAGCAATTCAGGAGGTTGAGGCAGGAGAAACACTTGAACCCGGGAGGCAGAGAT  
TGCAGTGAGGTGAGATTGTGCTACTGCACTCCAGCCTGGGCAACAGAGTGAGACTC

>AGAP10

CAGGCCAGGCGCGGTGGCTCACGCCTGTAATCCCAGCACTTTGGGAGGCTGAGGCGGGTGGATCATCTGAGGTC  
AGGAGTTCGAGACCAGCTTCGCCTACATAGTGAAATCTCGTCTCCACTAAAAAAAAAATCACAAAAATTAGCCGGG  
CGTGGTGGCAGGCGCCTGTAATCCCAGCTACTCGGGAGGCTGAGGCAGGAGAATCCCTTGAACCCGGGAGGCAG  
AGGTTGCAGTGAGCCAAGACTGTGCCACAGCACTCCAGCCTGGGTGACAGAGTGAGACTC

>hsamiR1972

TCAGGCCAGGCACAGTGGCTCA

>AANU01178229.1\_7254x6952\_RF00100\_7SK

GGCCAGGCACAGTGGCTCATGCCTGTAATCCCAGCGATTTGGGAGGCTGAGGCAGGCGGACCACCTGAGGTCAG  
GAGTTCGAGACCAGCCTGGCCAACATAGTGAAACCCTGTCTCTACTAAAAATACAAGAAATTAGCCAGATGTGGT  
GGCACGCAGCTGTAATCCCAGCAATTCAGGAGGTTGAGGCAGGAGAAACACTTGAACCCGGGAGG

>MSH5

GGCCAGGCACAGTGGCTCATGCCTGTAATCCCAGCACTTTGGGAGGCTGAGGTGGGTAGATCACCTGAGGTCAG  
GAGTTCGAGATCAGCCTACCAACATGGTGAAACCCTGTCTCTACTCAAATACAAAAATTAAGTGGCTTGGTGG  
CATGCACATGTAATCCAGCTACTTGGGAGGCTGAGGCAGGAGAATCTCTTGAACCCGGGAGG

>hsamiR1972

TCAGGCCAGGCACAGTGGCTCA

>AANU01178229.1\_7254x6952\_RF00100\_7SK

AGGCCAGGCACAGTGGCTCATGCCTGTAATCCCAGCGATTTGGGAGGCTGAGGCAGGCGGACCACCTGAGGTCA  
GGAGTTCGAGACCAGCCTGGCCAACATAGTGAAACCCTGTCTCTACTAAAAATACAAGAAATTAG

>GNB2L1

AGGCCGGGCACGGTGGCTCACGCCTGTAATCCCAGCACTTTGGGAGGCCGAGGCGGGCGGATCACGAGGTCAGG  
AGATCGAGACCATCCTGGCTAACACGGTGAAACCCCGTCTCTACTAAAAATACAAAAATTAG

>hsamiR1972

TCAGGCCAGGCACAGTGGCTCA  
>AANU01178229.1\_7254x6952\_RF00100\_7SK  
TTAAAAATTCAGGCCAGGCACAGTGGCTCATGCCTGTAATCCCAGCGATTTGGGAGGCTGAGGCAGGCCGACCAC  
CTGAGGTCAGGAGTTCGAGACCAGCCTGGCCAACATAGTGAAACCCTGTCTCTACTAAAAATACAAGAAATTAGC  
CAGATGTGGTGGCAGCGAGCTGTAATCCCAGCAATTCAGGAGGTTGAGGCAGGAGAAACACTTGAACCCGGGAG  
GCAGAGATTGCAGTGAGGTGAGATTGTGCTACTGCACTCCAGCCTGGGCAACAGAGTGAGACTC  
>SULT1A3  
T

>hsamiR1972  
TCAGGCCAGGCACAGTGGCTCA  
>AANU01178229.1\_7254x6952\_RF00100\_7SK  
TTAAAAATTCAGGCCAGGCACAGTGGCTCATGCCTGTAATCCCAGCGATTTGGGAGGCTGAGGCAGGCCGACCAC  
CTGAGGTCAGGAGTTCGAGACCAGCCTGGCCAACATAGTGAAACCCTGTCTCTACTAAAAATACAAGAAATTAGC  
CAGATGTGGTGGCAGCGAGCTGTAATCCCAGCAATTCAGGAGGTTGAGGCAGGAGAAACACTTGAACCCGGGAG  
GCAGAGATTGCAGTGAGGTGAGATTGTGCTACTGCACTCCAGCCTGGGCAACAGAGTGAGACTC  
>SULT1A4  
TTAAATATTTAGGCCGGGCACGGTGGCTCATGCCTGTAATACCAGCATTTTGGGAGGCTTAGGTGGGCAGGATCA  
CCTGAGGTCAGGAGTTTGGAGACCAGCCTGGCCAACATGGTTGAAACCCATCTCTACTAAAAATACAAAAATTAGC  
CAGGCGCGGTGGCAGGCGCGTGTAAATCCCAGCTACTCTGGAGGCTGAGGAAGGAGAATTGCTTGAACCAGGAG  
GCAGAGGTTGCAGTGAGCTGAGATCGCGCCACTACACTCCAGCCTGAGCGACAGAGTAAGACTC

>hsamiR1972  
TCAGGCCAGGCACAGTGGCTCA  
>AANU01178229.1\_7254x6952\_RF00100\_7SK  
GGCCAGGCACAGTGGCTCATGCCTGTAATCCCAGCGATTTGGGAGGCTGAGGCAGGCCGACCACCTGAGGTCAG  
GAGTTCGAGACCAGCCTGGCCAACATAGTGAAACCCTGTCTCTACTAAAAATACAAGAAATTAGCCAGATGTGGT  
GGCAGCGAGCTGTAATCCCAGCAATTCAGGAGGTTGAGGCAGGAGAAACACTTGAACCCGGGAGG  
>MSH5  
GGCCAGGCACAGTGGCTCATGCCTGTAATCCCAGCACTTTGGGAGGCTGAGGTGGGTAGATCACCTGAGGTCAG  
GAGTTCGAGATCAGCCTACCAACATGGTGAACCCTGTCTCTACTCAAATACAAAAAATTAAGTGGGCTTGGTG  
GCATGCACATGTAATTCCAGCTACTTGGGAGGCTGAGGCAGGAGAATCTCTTGAACCCGGGAGG

>hsamiR1972  
TCAGGCCAGGCACAGTGGCTCA  
>AANU01178229.1\_7254x6952\_RF00100\_7SK  
TCAGGCCAGGCACAGTGGCTCATGCCTGTAATCCCAGCGATTTGGGAGGCTGAGGCAGGCCGACCACCTGAGGT  
CAGGAGTTCGAGACCAGCCTGGCCAACATAGTGAAACCCTGTCTCTACTAAAAATACAAGAAATTAGCCAGATGT  
GGTGG  
>CTD-3025N20.2.1  
T

>hsamiR1972  
TCAGGCCAGGCACAGTGGCTCA  
>AANU01178229.1\_7254x6952\_RF00100\_7SK  
AGGCCAGGCACAGTGGCTCATGCCTGTAATCCCAGCGATTTGGGAGGCTGAGGCAGGCCGACCACCTGAGGTCA  
GGAGTTCGAGACCAGCCTGGCCAACATAGTGAAACCCTGTCTCTACTAAAAATACAAGAAATTAGCCAGATGTGG

TGGCACGCAGCTGTAATCCCAGCAATTCAGGAGGTTGAGGCAGGAGAAACACTTGAACCCGGGAGGCAGAGATT  
GCAGTGAGGTGAGATTGTGCTACTGCACTCCAGCCTGGGCAACAGAGTGAGAC

>RP11-566K11.2.1

AGGCCAGGTACAGTGGCTCATGCCTGTAATCCCAACACTTTGGGAGGCCGAGGCGGGTGGATCACGAAGTCAGG  
AGATCGAGACCATCCTGGCTAACATGGTCAAACCCCGTCTCTACTAAAGATACAAAAAATTAGCCGGGAATGGTG  
GCGGGTGCCTGTAGTCCCAGCTACTCGGGAGGCTGAAGCAGGAGAATCACTTGAACCCAGGAGGTGGAGCTTGC  
AGTGAGCTGAGATCATGCCATTGCACTCCAGCCTGGGCGACAGAGTGAGAC

>hsamiR1972

TCAGGCCAGGCACAGTGGCTCA

>AANU01178229.1\_7254x6952\_RF00100\_7SK

AGGCCAGGCACAGTGGCTCATGCCTGTAATCCCAGCGATTTGGGAGGCTGAGGCAGGCGGACCACCTGAGGTCA  
GGAGTTCGAGACCAGCCTGGCCAACATAGTGAAACCCGTCTCTACTAAAAATACAAGAAATTAGCCAGATGTGG  
TGGCACGCAGCTGTAATCCCAGCAATTCAGGAGGTTGAGGCAGGAGAAACACTTGAACCCGGGAGGCAGAGATT  
GCAGTGAGGTGAGATTGTGCTACTGCACTCCAGCCTGGGCAACAGAGTGAGAC

>RP11-566K11.2.1

GGCCGGGCACAGTGGCTCATGACTGTAATCCCAGCACTTTGGGAGGCTGACGTGGGAGGACCCAGGAGTGTAG  
ACAAAGATGCGCTTTGGAATGGAGACACAGGAGATGTGTTTTAAGATGCCTCTAGTAGGCCAGGTACAGTGGCTC  
ATGCCTGTAATCCCAACACTTTGGGAGGCCGAGGCGGGTGGATCACGAAGTCAGGAGATCGAGACCATCCTGGCT  
AACATGGTCAAACCCCGTCTCTACTAAAGATACAAAAAATTAGCCGGGAATGGTGGCGGGTGCCTGTAGTCCCAG  
CTACTCGGGAGGCTGAAGCAGGAGAATCACTTGAACCCAGGAGGTGGAGCTTGCAGTGAGCTGAGATCATGCCA  
TTGCACTCCAGCCTGGGCGACAGAGTGAGAC

>hsamiR1972

TCAGGCCAGGCACAGTGGCTCA

>AANU01178229.1\_7254x6952\_RF00100\_7SK

GGCCAGGCACAGTGGCTCATGCCTGTAATCCCAGCGATTTGGGAGGCTGA

>RP11-566K11.2.1

GGCCGGGCACAGTGGCTCATGACTGTAATCCCAGCACTTTGGGAGGCTGA

>hsamiR3620

TCACCCTGCATCCCGCACCCAG

>Copia\_53\_SB\_I\_Copia\_Sorghum\_bicolor

CACCCTGCATCCCGCACCC

>PARVG

CACCCTCCATCCCGCACCC

>hsamiR3620

TCACCCTGCATCCCGCACCCAG

>Copia\_53\_SB\_I\_Copia\_Sorghum\_bicolor

GGCCTCACCCTGCATCCCGCACCC

>PARVG

GGCCTCACCCTCCATCCCGCACCC

>hsamiR3620

TCACCCTGCATCCCGCACCCAG

>Copia\_53\_SB\_I\_Copia\_Sorghum\_bicolor

ATCCCGCACCCAGG  
>CTC-241N9.1.1  
ATCCCGCACCCAGG

>hsamiR3676\_5p  
AGGAGATCCTGGGTT  
>tRNA-Thr-ACY\_  
GGAGATCCTGGGTT  
>C5orf43  
GGAGATCCTGGGTT

>hsamiR3676\_3p  
CCGTGTTTCCCCACGCTTT  
>tRNA-Thr-ACY\_  
TGTTTCCCCACGCTTTTGCCAACA  
>SLC22A12  
TGTTTCCCCACGGTGGTGCCACA

>hsamiR3919  
GCAGAGAACAAAGGACTCAGT  
>ABDC01224945.1\_1546x1450\_RF00019\_Y\_RNA  
AGAACAAAGGACTCAGTAAATG  
>ZNF429  
AGAACAAAGGACACAGAAATG

>hsamiR3150b\_5p  
CAACCTCGAGGATCTCCCCAGC  
>GRANDE1\_ZD\_I  
AGGATCTCCCCAGCCT  
>STK36  
AGGATCTCCCCAGCCT

>hsamiR3934  
TCAGGTGTGGAAACTGAGGCAG  
>MIR  
GGAAACTGAGGCAGGA  
>CA7  
GGAAACTGAGGCAGGA

>hsamiR548aa  
AAAAACCACAATTACTTTTGACCA  
>MADE1  
CCATTACTTTTACAGGCCAAAACCACAATTACTTTTGACCAACCTA  
>DERA  
CCATTACTTTCAAAGGCCAAAACCACAATTGCTTCTGTACCAGCCTA

>hsamiR548aa  
AAAAACCACAATTACTTTTGACCA

>MADE1  
CCATTACTTTCAATGGCAAAAACCACAATTACTTTTGCACCAACCTA  
>DERA  
CCATTACTTTCAAAGGCAAAAACCACAATTGCTTCTGTACCAGCCTA

>hsamir151a\_5p  
TCGAGGAGCTCACAGTCTAGT  
>L2\_Plat1o/MdoRep1\_SINE\_Metatheria  
CCCTGTCCTCAAGGAGCT  
>IL15  
CCCTGTCCTCAAGGAGCTCACAG

>hsamiR574\_3p  
CACGCTCATGCACACACCCACA  
>hAT-N53\_DR  
ACACACACTCACACACACACTCAC  
>SOX5  
ACACACACACACACACACACTCAC

>hsamiR574\_3p  
CACGCTCATGCACACACCCACA  
>hAT-N53\_DR  
CACACACTCACACACACACTCACAC  
>SOX5  
CACACACACACACACACACACACAC

>hsamiR574\_3p  
CACGCTCATGCACACACCCACA  
>hAT-N53\_DR  
ACACACACTCACACACACACAC  
>SOX5  
ACACACACACACACACACACACAC

>hsamiR574\_3p  
CACGCTCATGCACACACCCACA  
>hAT-N53\_DR  
ACACACACTCACACACACACAC  
>SOX5  
ACACACACACACACACACACACA

>hsamiR574\_3p  
CACGCTCATGCACACACCCACA  
>hAT-N53\_DR  
ACACACACTCACACACACACAC  
>HADHB  
ACACACACCCACACACACACAC

>hsamiR574\_3p

CACGCTCATGCACACACCCACA  
>hAT-N53\_DR  
CACACACTCACACACACACTCACACGCCCGCACCC  
>HADHB  
CACACACACCCACACACACACACACACCCCCACACCC

>hsamiR574\_5p  
TGAGTGTGTGTGTGTGAGTGTGT  
>hAT-N53\_DR  
GTGTGGGCGTGTGGGTGTGTG  
>SPINK13  
GTGTGTGCGTGTGGGTGTGTGTGTGTGT

>hsamiR574\_5p  
TGAGTGTGTGTGTGTGAGTGTGT  
>hAT-N53\_DR  
GTGTGGGCGTGTGGGTGTGTG  
>SPINK13  
GTGTGTGCGTGTGGGTGTGTG

>hsamiR574\_5p  
TGAGTGTGTGTGTGTGAGTGTGT  
>hAT-N53\_DR  
GTGTGGGCGTGTGGGTGTGTG  
>SPINK13  
GTGTGTGCGTGTGGGTGTGTGTGTGTGTGTG

>hsamiR574\_5p  
TGAGTGTGTGTGTGTGAGTGTGT  
>hAT-N53\_DR  
GTGTGGGCGTGTGGGTGTGTG  
>SPINK13  
GTGTGTGCGTGTGGGTGTGTGTGTGTGTGT

>hsamiR574\_5p  
TGAGTGTGTGTGTGTGAGTGTGT  
>hAT-N53\_DR  
GTGTGGGCGTGTGGGTGTGTG  
>SPINK13  
GTGTGTGCGTGTGGGTGTGTGTGTGTGTG

>hsamiR574\_5p  
TGAGTGTGTGTGTGTGAGTGTGT  
>hAT-N53\_DR  
GTGTGGGCGTGTGGGTGTGTG  
>SPINK13  
GTGTGTGCGTGTGGGTGTGTGTGTGTG

>hsamiR762  
GGGGCTGGGGCCGGGGCCGAGC  
>NonLTR\_5\_CR\_Non\_LTR\_Retrotransposon\_Chlamydomonas\_reinhardtii  
AGGCCGGGGCGGGGCG  
>HRAS  
AGGCCGGGGCGGGGCG

>hsamiR762  
GGGGCTGGGGCCGGGGCCGAGC  
>NonLTR\_5\_CR\_Non\_LTR\_Retrotransposon\_Chlamydomonas\_reinhardtii  
AGGCCGGGGCGGGGCG  
>HRAS  
AGGCCGGGGCGGGGCGGG

>hsamiR935  
CCAGTTACCGCTTCCGCTACCGC  
>MERMITE18C  
CCGCCGCCGCTCCGCCGCCGCCCCGGCGCCCCCGGCCGCGCCGCCG  
>CARM1  
CCGCCGCCGCCGCCGCCGCCGCCGCCGCCGCCGCCGCCGCCGCCGCCGCTGCCGCTACCGC

>hsamiR935  
CCAGTTACCGCTTCCGCTACCGC  
>MERMITE18C  
CCGCCGCCGCTCCGCCGCCGCCCCGGCGCCCCCGGCCGCGCCGC  
>CARM1  
CCGCCGCCGCCGCCGCCGCCGCCGCCGCCGCCGCCGCCGCCGCCGCTGCCGCTACCGC

>hsamiR935  
CCAGTTACCGCTTCCGCTACCGC  
>MERMITE18C  
CGCCGCCGCCGCCGCCGCCG  
>CARM1  
CGCCGCCGCCGCCGCCGCCGCTGCCGCTACCGC

>hsamiR935  
CCAGTTACCGCTTCCGCTACCGC  
>MERMITE18C  
CCGCCGCCGCCCCGGCGCCCCGGCGCCGCCGCGAACGCCCCACGGCGCCGCCGCCGCCGCCG  
>CARM1  
CCGCCGCCGCTGCCGCCGCCGCCGCCGCCGCCGCCGCCGCCGCCGCCGCCGCCGCCGCTGCCGCTACCGC

>hsamiR935  
CCAGTTACCGCTTCCGCTACCGC  
>MERMITE18C  
GCCGCCGCCCCGGCGCCCCGGCGCCGCCGCGAACGCCCCACGGCGCCGCCGCCGCCGCCGCCG  
>CARM1  
GCCGCCGCCGCTGCCGCCGCCGCCGCCGCCGCCGCCGCCGCCGCCGCCGCCGCCGCCGCTGCCGCTACCGC







>AluJ  
CCAGCCTGGGCAACAAAGTGAGA  
>LGMN  
CCAGCCTGGGCAACAGAGTGAGAC

>hsamiR1285\_3p  
TCTGGGCAACAAAGTGAGACCT  
>AluJ  
CCTGTAGTCCCAACTACTTGGGAGGCTGAGGCAGGAGGACTGCCTGAGCCTAGGAGTTTGCAGCTGCACTGAGCT  
ATGATGGTGCCGCTGCACTCCAGCCTGGGCAAAAGAGTGAGACT  
>LGMN  
CCTGTAATCCCAGCTACTCGGGAGGCTGAGGCAGGAGAATGGCTTGAACCTGGGAAGCAGCGGTTGCAGTGAGC  
TGAGATTGTGCCACTGCACTCCAGCCTGGGCAACAGAGTGAGACTCCAC

>hsamiR1285\_3p  
TCTGGGCAACAAAGTGAGACCT  
>AluJ  
CTGTAGTCCCAACTACTTGGGAGGCTGAGGCAGGAGGACTGCCTGAGCCTAGGAGTTTGCAGCTGCACTGAGCTA  
TGATGGTGCCGCTGCACTCCAGCCTGGGCAAAAGAGTGAGAC  
>LGMN  
CTGTAATCCCAGCTACTCGGGAGGCTGAGGCAGGAGAATTGCTTGAACCCGGGAGGCAGAGGTTGCAGTGAGCC  
AAGATTGTGCCACTGCACTCCAGCCTGGGCAACAGAGTAAGACC

>hsamiR1285\_3p  
TCTGGGCAACAAAGTGAGACCT  
>AluJ  
CCAGCCTGGGCAACAAAGTGAGA  
>LGMN  
CCAGCCTGGGCAACAGAGTGAGACTCCAC

>hsamiR1285\_3p  
TCTGGGCAACAAAGTGAGACCT  
>AluJ  
CCAGGAGTTTGTAGACCAGCCTGGGCAACAAAGTGAGATCCTATCTCTACAAATAATAAAAAAATTAGCTGGGTGT  
GGTGGCATATGCCTGTAGTCCCAACTACTTGGGAGGCTGAGGCAGGAGGACTGCCTGAGCCTAGGAGTTTGCAG  
CTGCACTGAGCTATGATGGTGCCGCTGCACTCCAGCCTGGG  
>CAPS  
CCAGGAGTTTGTAGACCCGCCTGTGCAACATAGTGAGACCCCCCATCTCTACAAAACTACAAAAAATTAGCCAGG  
CATGGTGGTGTGTTCTGTAATCCCACCTACTTGAAGGCTGAGGCAGGAGGATCACTTGAGCCCGGGAGTTGGA  
GGCTGCAGTGAGCTATGATCGCACCCTGCACTCCAGCCTGGG

>hsamiR1285\_3p  
TCTGGGCAACAAAGTGAGACCT  
>AluJ  
GGTGGCTCACACCTGCAATCCCAGCACTTGTGAGGCTAAGGTGGG  
>CAPS  
GCAACATAGTGAGACCCCCCATCTCTACAAAACTACAAAAAATTAGCCAGGCATGGTGGTGTGTTCTGTAATC  
CCACCTACTTGAAGGCTGAGGCAGGAGGATCACTTGAGCCCGGGAGTTGGAGGCTGCAGTGAGCTATGATCGC

ACCACTGCACTCCAGCCTGGGTTACAGAGCAAGACGCCCGCTCTTAAAAATAAGTAAATAAACTGGCCGGGCAC  
GGTGGCTCACGCCTGTAATCCCAGCACTTTGGGAGGCCGAGGCGGGCAGATCATGAGGTCAGCAGTTCGAGACC  
AGCCTGGCCAACATGGTGAAACCCTGTCTCTACTATAAAATACAAAAATTAGTCAGCCGGGTGCGGTGGCTCATGCC  
TGTAATCACAGCACTTTGGGAGGCCGAGGCAGACAGATCACCTGAGGTCAGGAGTTTGGAGACCAGCCTGGCCAA  
CATGGTGAAACCCTGTCTCTACTTAAATAACGAAAACTAGCTGGGCGTGGTGGTATGTGCCTGTAATCCCAGCTA  
CTCGGGAGGCTGAGGCAGGAGAATTGCATGAACCTGGGAAGCGGAGGTTGCAGTGAGCCGAGATCGTGCCATT  
GCACTCCAGACTGGGGGACAAGAGCAAGACTTTGTCTCAAAAAAAAAAAAAAGAAAATTAGCCAGGTATGGTGGC  
GGGTGCCTGTAATCCCACCTACTCCAGAGGCTGAGGCAGGAGAATCACTTGAACCCAGGAGGCAGAGGTTGCAG  
TGAACCAAGACCATGCCACTGCACCACAGCCTGGGCGACAGAGTGAGACTCTGTCTCAAAAATAAATAAATAACTT  
AAAAAAGAGGCCAGGGCTGGGCGCGGTGGCTCACAGCTGTAATCCCAGCACTTTGGGAGGCTGAGGTGGG

>hsamiR1285\_3p  
TCTGGGCAACAAAGTGAGACCT  
>AluJ  
CTGCACTCCAGCCTGGGCAAAAGAGTGAGACT  
>PRKAB1  
CTGCCCTCCAGCCTGGGCAACAGAGTGAGACT

>hsamiR1285\_3p  
TCTGGGCAACAAAGTGAGACCT  
>AluJ  
CCAGCCTGGGCAACAAAGTGAGA  
>PRKAB1  
CCAGCCTGGGCAACAGAGTGAGAC

>hsamiR1285\_3p  
TCTGGGCAACAAAGTGAGACCT  
>AluJ  
GCTGCACTCCAGCCTGGGCAAAAGAGTGAGA  
>IFT46  
GCTGCACTCCAGCCCGGGCAACAGAGTGAGA

>hsamiR1285\_3p  
TCTGGGCAACAAAGTGAGACCT  
>AluJ  
GTGCCGCTGCACTCCAGCCTGGGCAAAAGAGTGAGACTGTGTCCAAGGAAAAAAAAAAAAA  
>SH3BP5  
GTGCCACTGCACTCCAGCCTGGGCAACAAAGTGAGACTCTGTCTCAAAAAAAAAAAAAA

>hsamiR1285\_3p  
TCTGGGCAACAAAGTGAGACCT  
>AluJ  
CCAGCCTGGGCAACAAAGTGAGA  
>SH3BP5  
CCAGCCTGGGCAACAAAGTGAGAC

>hsamiR1285\_3p

TCTGGGCAACAAAGTGAGACCT

>AluJ

CCAGGAGTTTGAGACCAGCCTGGGCAACAAAGTGAGATCCTATCTCT

>ABCG5

CCAGGAGTTTGAGACCAGCTTGGGCAACAAAGAGAGACCCTGTCTCT

>hsamiR1285\_3p

TCTGGGCAACAAAGTGAGACCT

>AluJ

CTGCACTCCAGCCTGGGCAAAAGAGTGAGACTGTGTC

>C11orf48

CTGCACTCCAGCTGGGCAACAGAGTGAGACTCTGTC

>hsamiR1285\_3p

TCTGGGCAACAAAGTGAGACCT

>AluJ

TGTAGTCCCACTACTTGGGAGGCTGAGGCAGGAGGACTGCCTGAGCCTAGGAGTTTGCAGCTGCACTGAGCTAT

GATGGTGCCGCTGCACTCCAGCCTGGGCAAAAGAGTGAGACTGT

>HARS

TGTAGTCCAGCTACTTGGGAGGCTGATGCATGAGGATCCTTGAACCTGGGAGGTGGAGGTTGCAGTGAGCCGA

GATTGTGCCACTGCACTCCAGCCTGGGCAACAGAGTGAGACTGT

>hsamiR1285\_3p

TCTGGGCAACAAAGTGAGACCT

>AluJ

CCAGCCTGGGCAACAAAGTGAGA

>HARS

CCAGCCTGGGCAACAGAGTGAGAC

>hsamiR1285\_3p

TCTGGGCAACAAAGTGAGACCT

>AluJ

CAGGAGTTTGAGACCAGCCTGGGCAACA

>C1S

CAGGAGTTTGAGATCAGCCTGGGCAACATGGTGAGACC

>hsamiR1285\_3p

TCTGGGCAACAAAGTGAGACCT

>AluJ

GCCTGTAGTCCCACTACTTGGGAGGCTGAGGCAGGAGGACTGCCTGAGCCTAGGAGTTTGCAGCTGCACTGAGC

TATGATGGTGCCGCTGCACTCCAGCCTGGGCAAAAGAGTGA

>C1S

GCCTATAGTCCTAGCTACTTGGGAGGCTCAGGCAGGAGGATCACTTGAACCCAGGAAGTTGAAACTGCAGTGAGC

TGTGATTGTGCCGCTGCACTCCAGCCTGGGCAACAGAGTGA

>hsamiR1285\_3p

TCTGGGCAACAAAGTGAGACCT

>AluJ

CCAGCCTGGGCAACAAAGTGA  
>C1S  
CCAGCCTGGGCAACAGAGTGA

>hsamiR1285\_3p  
TCTGGGCAACAAAGTGAGACCT  
>AluJ  
CCAGGAGTTTGGAGACCAGCCTGGGCAACAAAGTGAGATCCTATCTCTACAAATAATAAAAAAATTAGCTGGGTGT  
GGTGGCATATGCCTGTAGTCCCAACTACTTGGGAGGCTGAGGCAGGAG  
>BRF1  
CCAGGAGTTCGAGACCAGCCTGGGCAACAAAGTGAGATCCCTGTCTCTACAAAAATTTAAAAATTAGCTGTGCGT  
GGTGGTGCCTTAGTTCAGCTACTTGGGAGGCTGAGGCAGGAG

>hsamiR1285\_3p  
TCTGGGCAACAAAGTGAGACCT  
>AluJ  
AAAAAAATTAGCTGGGTGTGGTGGCATATGCCTGTAGTCCCAACTACTTGGGAGGCTGAGGCAGGAGGACTGCCT  
GAGCCTAGGAGTTTGCAGCTGCACTGAGCTATGATGGTGCCGCTGCACTCCAGCCTGGGCAAAAGAGTGAGACT  
>PRR19  
AAAAAAATTAGCTGGGCATGGTGGTGCACGCCTGTAATCCCAGCTACTCAGGAGGCTGAGGCAGGAGAATTGCTT  
GAACCCAGAAGGCAGAAGTTGCAGTGAGTCACGATTGTGCCACTGCACTTCAGTCTGGGCAATAGAGTGAGACT

>hsamiR1285\_3p  
TCTGGGCAACAAAGTGAGACCT  
>AluJ  
TGCACTCCAGCCTGGGCAAAAGAGTGAGAC  
>ZKSCAN5  
TGCACTCCAGCCTGGGCAACATAGTGAGACC

>hsamiR1285\_3p  
TCTGGGCAACAAAGTGAGACCT  
>AluJ  
CCAGCCTGGGCAACAAAGTGAGATCCTATCTCT  
>ZKSCAN5  
CCAGCCTGGGCAACATAGTGAGACCCCATCTCT

>hsamiR1285\_3p  
TCTGGGCAACAAAGTGAGACCT  
>AluJ  
GAGTTTGGAGACCAGCCTGGGCAACAAAGTGAGA  
>C16orf85  
GAGTTTGGAGACCAGCCTGGGCAACAGAGTGAGACC

>hsamiR1285\_3p  
TCTGGGCAACAAAGTGAGACCT  
>AluJ  
CCAGCCTGGGCAAAAGAGTGAGAC  
>C16orf85

CCAGCCTGGGCAACAGAGTGAGACC

>hsamiR1285\_3p

TCTGGGCAACAAAGTGAGACCT

>AluJ

AGGAGTTTGAGACCAGCCTGGGCAACAAAGTGAGATCCTATCTCTACAAA

>AC002511.1

AGGAGTTCAAGACCAGCCTGGGCAACACAGTGAGAGCCTTTCTCTACAAA

>hsamiR1285\_3p

TCTGGGCAACAAAGTGAGACCT

>AluJ

CTGCACTCCAGCCTGGGCAAAAGAGTGAGACT

>AC004017.1

CTGCACTCCAGCCCAGGCAACAGAGTGAGACT

>hsamiR1285\_3p

TCTGGGCAACAAAGTGAGACCT

>AluJ

GAGTTTGAGACCAGCCTGGGCAACAAAGTGAGATCCTATCTCTACAAATAATAAAAAAATTAGCTGGGTGTGGTG

GCATATGCCTGTAGTCCCAACTACTTGGGAGGCTGAGGCAGGAGGACTGCCTGAG

>GET4

GAGTTTGAGACTGGCCTGAGCAACATAGTGAGACCCTGTCTCTACAAAAACACAGAAATTAGCTGGGCATGGTG

GTGTGCACCTGTGGTCCCAGCTACTCGGGAGGCTGAGGTGGGAGGACTGCTTGAG

>hsamiR1289

TGGAGTCCAGGAATCTGCATTTT

>MER5A

CGGTGGCTCACGCCTGTAATCCCAGCCCTTTGGGAGGCCGAGGCCGGGAGGATCACGAGGTCAAGAGAGATCGAG

ACCATCCTGGCCAACATGGTCAAATCCTGTCTCTACTAAAAATACAAAAATTAGCCGGGCGTGGTGGCGGGCGCC

TGTAGTCCCAGCTACTCG

>CTSB

CGGTGGCTCACGCCTGTAATCCCAGCATTTTGGGAGGCCGAGGCCGGTGAGTCACCTGAGGTCGGGAGTTTCGAG

ACCATCCTGACCAACATGGAGAAACCCCGTCTCTACTAAAAATACAAAATAGCCGGGCGTGGTGGCGCGTGTCA

GTAATCCCAGCTACTCGGGA

>hsamiR1289

TGGAGTCCAGGAATCTGCATTTT

>MER5A

CGGTGGCTCACGCCTGTAATCCCAGCCCTTTGGGAGGCCGAGGCCGGGAGGATCACGAGGTCAAGAGAGATCGAG

ACCATCCTGGCCAACATGGTCAAATCCTGTCTCTACTAAAAATACAAAAATTAGCCGGGCGTGGTGGCGGGCGCC

TGTAGTCCCAGCTACTCG

>CTSB

CGGTGGCTCACGCCTGTAATCCCAGCATTTTGGGAGGCCGAGGCCGGTGAGTCACCTGAGGTCGGGAGTTTCGAG

ACCATCCTGACCAACATGGAGAAACCCCGTCTCTACTAAAAATACAAAATAGCCGGGCGTGGTGGCGCGTGTCA

GTAATCCCAGCTACTCG

>hsamiR1303

TTTAGAGACGGGGTCTTGCTCT

>PB1D11

GCCTCCCAAAGTGTTGGAATTACAGGTG

>ACAD10

GCCTCCCAAAGTGCTGGAATTACAGGTG

>hsamiR1304\_5p

TTTGAGGCTACAGTGAGATGTG

>ALU\_SINE1\_7SL\_Primates

CTTGAGCCCAGGGGTTTCGAGGCTACAGTGAG

>WHSC1

CTTGAGCCCAGGAGTTGGAGGCTACAGTGAG

>hsamiR1304\_3p

TCTCACTGTAGCCTCGAACCCC

>ALU\_SINE1\_7SL\_Primates

CTCACTGTAGCCTCAAACCGCTGGGCTCAAGTGTTCCTCCTGCCTTAGCCTCCAGAGTAGCTGGG

>IFT81

CTCACTGTAGCCTCAAACCTCCTAGGCTCAAGCAATCCTCCTGCTTCAGCCTCCAGAGTAGCTGGG

>hsamiR1255a

AGGATGAGCAAAGAAAGTAGATT

>TIGGER1

AGGAGTTGCTTCTCAAGGATGAGCAAAGAA

>ZBTB38

AGGAGTTGCTTCTTATGGATGAGCAAAGAAA

>hsamiR1273a

GGGCGACAAAGCAAGACTCTTTCTT

>AluS

GCCTTCCAAAGTGCTGGGATTACAGG

>TMEM68

GACAGAGCAAGACTCTGTCTCAAAAAAATTAAGTAAAAAAGAGCAGTCAAATGAAGAAATTAATTTGATGG

AGTTAACTCATAAAGCTAAAACACAAGAAGATAAAGAAGACAAAATACACTGAATTATTTATACATATAAGTAAAT

ATAGTTTATTTGCTTGTGTTTTGTAGAGATGGGTTCTTGCTTTGTTGCTCAGGCTAGTCTTGAAGTGGTTTCAAGGGA

TCCTCCTGCCTCAGCCTCCCAAAGTGCTGGGATTACAGG

>hsamiR1277\_5p

AAATATATATATATATGTACGTAT

>EnSpm-8\_HM

ATATATATATATATTT

>FAM188B

ATATATATATATATTT

>hsamiR1277\_5p

AAATATATATATATATGTACGTAT

>EnSpm-8\_HM

ATATATATATATATTT

>RND3  
ATATATATATATATTT

>hsamiR1277\_5p  
AAATATATATATATATGTACGTAT  
>EnSpm-8\_HM  
ATATATATATATATTT  
>SRGAP1  
ATATATATATATATTT

>hsamiR1277\_5p  
AAATATATATATATATGTACGTAT  
>EnSpm-8\_HM  
ATATATATATATATTTG  
>AC120194.1  
ATATATATATATATTTG

>hsamiR1277\_5p  
AAATATATATATATATGTACGTAT  
>EnSpm-8\_HM  
ATATATATATATATTTG  
>AC120194.1  
ATATATATATATATTTGTA

>hsamiR3133  
TAAAGAACTCTTAAAACCCAAT  
>L1MC3  
AGAATATATAAAGAACTCTTAAAACCTCAA  
>AK3  
AGAATATCTAAAGAACTCTTACAACCTCAAT

>hsamiR3134  
TGATGGATAAAAGACTACATATT  
>L1PB1  
GTGAGGGATAAAAGACTACACATTGGATACAGTGTACATTGCTCAGGGGACCAGTGCACCAAAATCTCAGAAATC  
ATCAATAAAGAACTTATCTATGTAACCAAAAACCACTGTTCCCCAGGAACTATTGAAATAAAA  
>AC023632.1  
GTGAGGGATAAAAGACTACATATTGGGTACAGTGCACACTGCTTGGGAGACAGGTACACTAAAATCTCAGAAATC  
ACCGTTAAAGAACTTATCCATGTAAACAACCACTTGATCCCCAAAACCTATTGAAATAAAA

>hsamiR1273c  
GGCGACAAAACGAGACCCTGTC  
>AluJ  
GTGGCTCACGCCTGTAATCCCAGCACTTCGGGAGGCCAAGGCAGGTGGATAACCTGAGGTCAGGAGTTCAAGAC  
CAGTCTGGCCAACATGGTCAAACCCCGTCT  
>ZNF687  
CGAGACCCTGTCTCAAAAAAAGAAATATAGGGGGCTGGGCATGGTGGCTCACGCCTGTAATCCCAGCACTTGGG  
GAGGCAGAGGCGGGCGGATCACGAGGTCAGGAGATCAAGACCATCCTGGCCAAGATAGTCAAACCCCGTCT



>hsamiR1273c  
GGCGACAAAACGAGACCCTGTC  
>AluJ  
TGCACTCCAGCTTGGGCAACAGAACGAGACTCTGTCTCAGAAAAAA  
>ZNF687  
TGCACTCCAGCCTGGACAGAGCGAGACCCTGTCTCAAAAAAAA

>hsamiR3159  
TAGGATTACAAGTGTCGGCCAC  
>MurSatRep1  
TTTTTGAGATGGAGTCTCGCTCTGTTGCCAGGCCAGAGTGCAGAGGCGCGATCTCCGCTCACTGCAAGCTCCGCCT  
TCCGGGTTCAAGCTATTCTCCTGCCTCAGACTCCCGAGTAGCTGGGACTACAGGCGCGCACCATTACACACAGCTA  
ATTTTTTCGTATTTTAGTAGAGACGAGGTTTCACCATGTTGGCCAGGATGGTCTCGATCTTCTGACCTCGTGATCC  
ACC  
>BACE1  
TTTTTGAGATGGAGTTTCGCTCTTGTACCCAGGCTGGAGTGCAATGGCGCGATCTCCGCTCACTGCCATCTCCGC  
CTCCTGGGTTCAAGTGATTCTCCTGTCTCAGTCTCCTGAGTAGCTGGGATTACAAGTGTGCGCTACCACGCAGGGC  
TAATTTTTGTATTTTAGTAGAGACGAGGTTTCACCACGTTGGCCAGGCTGGTCTCGAACTCCTGACCTCAGGTGAT  
CCACC

>hsamiR3611  
TTGTGAAGAAAGAAATTCTTA  
>MER44C\_Mariner\_Tc1\_Homo\_sapiens  
TGAAGAAAAAGAAATTCTT  
>SPATA4  
TGAAGAAAAAGAAATTCTT

>hsamiR3680\_3p  
TTTTGCATGACCCTGGGAGTAGG  
>MER96  
CTGTAATCCCAGCTACTCAGGAAGCTGGGGCAGGAGAATTGCTTGAACCTGGGAGGCAGAGGTTGCAGTGGGCC  
GAGATCCTGCCATTGCACTCCAGCCTGGG  
>CAPS  
CTGTAATCCCAGCTACTCGGGAGGCTGAGGCAGGAGAATTGCATGAACCTGGGAAGCGGAGGTTGCAGTGAGCC  
GAGATCGTGCCATTGCACTCCAGACTGGG

>hsamiR3919  
GCAGAGAACAAAGGACTCAGT  
>ABDC01224945.1\_1546x1450\_RF00019\_Y\_RNA  
GTAGAGAACAAAGG  
>SLC35B1  
GTAGAGAACAAAGG

## ORF Aligning Sequences

---

>hsamiR1202  
GTGCCAGCTGCAGTGGGGGAG

>MER52A  
GTGCCAGCTGCAGTGGGGGA  
>CALD1  
GTGCCTGCTGCAGTGGGGGA

>hsamiR1202  
GTGCCAGCTGCAGTGGGGGAG  
>MER52A  
GTGCCAGCTGCAGTGGGGGA  
>CALD1  
GTTTCCTTATTTGGTGTGCCTGCTGCAGTGGGGGA

>hsamiR1202  
GTGCCAGCTGCAGTGGGGGAG  
>MER52A  
GTGCCAGCTGCAGTGGGGGA  
>CALD1  
CTAGAAACCCCTACCTTCAAGCCAGCAGTTTCCTTATTTGGTGTGCCTGCTGCAGTGGGGGA

>hsamiR1202  
GTGCCAGCTGCAGTGGGGGAG  
>MER52A  
GTGCCAGCTGCAGTGGGGGA  
>CALD1  
GTGCCTGCTGCAGTGGGGGATGAAAACACATTCCCTTT

>hsamiR1202  
GTGCCAGCTGCAGTGGGGGAG  
>MER52A  
GTGCCAGCTGCAGTGGGGGA  
>CALD1  
CATTCAATTGATGCGGCTAGAAACCCCTACCTTCAAGCCAGCAGTTTCCTTATTTGGTGTGCCTGCTGCAGTGGGGG  
A

>hsamiR1202  
GTGCCAGCTGCAGTGGGGGAG  
>MER52A  
GTGCCAGCTGCAGTGGGGGA  
>CALD1  
GTGCCTGCTGCAGTGGGGGATGA

>hsamiR1202  
GTGCCAGCTGCAGTGGGGGAG  
>MER52A

GTGCCAGCTGCAGTGGGGGA  
>CALD1  
GTGCCTGCTGCAGTGGGGGATGAAAACACATTCCCTTTCTCCCACATACTCTT

>hsamiR1202  
GTGCCAGCTGCAGTGGGGGAG  
>MER52A  
GTGCCAGCTGCAGTGGGGGA  
>CALD1  
GTGCCTGCTGCAGTGGGGGATGAAAACACATTCCCTTTCTCCCACATACTCTTGATGTTGCGTACACCTTCAGCAG  
GAACAGGAAGATCCGAGGCTGCCGGCTTTGTAGGTTTTGCGCTTTTTGTTCCCTCAATTGCACTGGTATACTGCTCC  
AGTCTGCTGTCAATCTTGAGACTATTGCTGCTTGATGGGTGCGATTTGACACCACTGCTTTTCTGCACAGACTTATT  
CAAAAATTCTGCTCGCTCTTCTATCTTGAGAGATGAACCTTTAGGAGTGAAACACTTGAATGGTTTCTTGTCATCTG  
ACAAGCCATCTTCTGGCATCTTCTGGCGTTTCTCAGCAGCTTCTGCTCTTCGCCTTTCAATCTCTTCTTTAGCCTCCT  
CTTCTCTTCTCCTCTCTGAGTTTTCGATCGGCTTCTCCTGCTTCTCCTCTGCTCTTCTCCTCCAGGACCTTCCTTC  
TCTCCTCCCTCTTTTTCTTGAGTTCCTCCAGCTCCAAAGCCGCCTCCTGCTGCTTCTGTTTGTAGCTTCTCGAACTTTC  
GCTCTCGGTCTCCCCGCGACGACGACGAAGCTCCTCCAGCCTTTTGCCGGCTTCCACCTGGGGGGCGCCCTCAGCC  
TCCTTGGTGTCCACGCTGGCCCTCCTCCAGGGCGGCTGAAAGTATTCTCAGTATGTTTAAAGTTTGTGGGTCATGA  
ATTCTCCATTCTGCGACTTAACTTCTGTAATCCCTTCTTTTCGATCCATGAAGCTCTTAACTTCTTCTTTGGGTTCTTT  
GTCCTTTTTAATCTTTTCATCTTTGATCTGATTTTCTCCAATGCTCCCTCGCTTTGGCTTCTCCTCTTCTCCTCCTCCT  
TTCCTTGCTTCTTTCTTGTTTTCTCAGCATCCCTCCAATCATTCTTCTGGTAGGACTTGGTGACTGTTTCTGTTTCTC  
CTATCTCGTATCTTTCTTGCGACTTTCACTTTTTCTCCTTCTCGGTAGTTTCATTTTCTGCTGTGTCAATTTGCATT  
CTTCTGCTTGGGAGCGACAGACTTGCATCTGTTATTGTTGGGTGCGAACTCCTTCTGCCGCTCCAGAGCCTCCTGAAG  
GCGTTTTTGGCGTCTTTCTCACGCCGAGCCAGGCGCTCCAG

>hsamiR1202  
GTGCCAGCTGCAGTGGGGGAG  
>MER52A  
GTGCCAGCTGCAGTGGGGGA  
>CALD1  
GTGCCTGCTGCAGTGGGGGATGAAAACACATTCCCTTTCTCCCACATACTCTTGATGTTGCGTACACCTTCAGCAG  
GAACAGGAAGATCCGAGGCTGCCGGCTTTGTAGGTTTTGCGCTTTTTGTTCCCTCAATTGCACTGGTATACTGCTCC  
AGTCTGCTGTCAATCTTGAGACTATTGCTGCTTGATGGGTGCGATTTGACACCACTGCTTTTCTGCACAGACTTATT  
CAAAAATTCTGCTCGCTCTTCTATCTTGAGAGATGAACCTTTAGGAGTGAAACACTTGAATGGTTTCTTGTCATCTG  
ACAAGCCATCTTCTGGCATCTTCTGGCGTTTCTCAGCAGCTTCTGCTCTTCGCCTTTCAATCTCTTCTTTAGCCTCCT  
CTTCTCTTCTCCTCTCTGAGTTTTCGATCGGCTTCTCCTGCTTCTCCTCTGCTCTTCTCCTCCAGGACCTTCCTTC  
TCTCCTCCCTCTTTTTCTTGAGTTCCTCCAGCTCCAAAGCCGCCTCCTGCTGCTTCTGTTTGTAGCTTCTCGAACTTTC  
GCTCTCGGTCTCCCCGCGACGACGACGAAGCTCCTCCAGCCTTTTGCCGGCTTCCACCTGGGGGGCGCCCTCAGCC  
TCCTTGGTGTCCACGCTGGCCCTCCTCCAGGGCGGCTGAAAGTATTCTCAGTATGTTTAAAGTTTGTGGGTCATGA  
ATTCTCCATTCTGCGACTTAACTTCTGTAATCCCTTCTTTTCGATCCATGAAGCTCTTAACTTCTTCTTTGGGTTCTTT  
GTCCTTTTTAATCTTTTCATCTTTGATCTGATTTTCTCCAATGCTCCCTCGCTTTGGCTTCTCCTCTTCTCCTCCTCCT  
TTCCTTGCTTCTTTCTTGTTTTCTCAGCATCCCTCCAATCATTCTTCTGGTAGGACTTGGTGACTGTTTCTGTTTCTC  
CTATCTCGTATCTTTCTTGCGACTTTCACTTTTTCTCCTTCTCGGTAGTTTCATTTTCTGCTGTGTCAATTTGCATT

CTTCTGCTGGGAGCGACAGACTTGCATCTGTTATTGTTGGGTCGAACTCCTTCTGCCGCTCCAGAGCCTCCTGAAG  
GCGTTTTTGGCGTCTTTCCTCACGCCG

>hsamiR1202

GTGCCAGCTGCAGTGGGGGAG

>MER52A

GTGCCAGCTGCAGTGGGGGA

>CALD1

AGCCATTCATTGATGCGGCTAGAAACCCCTACCTTCAAGCCAGCAGTTTCCTTATTTGGTGTGCCTGCTGCAGTGG  
GGA

>hsamiR1202

GTGCCAGCTGCAGTGGGGGAG

>MER52A

GTGCCAGCTGCAGTGGGGGA

>CALD1

TCTGGGGTTTTAGTTAGCCATTCATTGATGCGGCTAGAAACCCCTACCTTCAAGCCAGCAGTTTCCTTATTTGGTGT  
GCCTGCTGCAGTGGGGGA

>hsamiR1202

GTGCCAGCTGCAGTGGGGGAG

>MER52A

GTGCCAGCTGCAGTGGGGGA

>CALD1

GTGCCTGCTGCAGTGGGGGATGAAAACACATTCCC

>hsamiR1202

GTGCCAGCTGCAGTGGGGGAG

>MER52A

GTGCCAGCTGCAGTGGGGGA

>CALD1

CGGCTAGAAACCCCTACCTTCAAGCCAGCAGTTTCCTTATTTGGTGTGCCTGCTGCAGTGGGGGA

>hsamiR1202

GTGCCAGCTGCAGTGGGGGAG

>MER52A

GTGCCAGCTGCAGTGGGGGA

>CALD1

TCAAACCTTAGTGGGGGAAGTGACCTTATCCACAGATTGCTTTCCAGAGGTTCCGCTTGCTGGATACGTCTCCTG  
GTCTCAAGTCAGAAGGTTTGGGAGCAGGTGACTTGTTCATCTGGGGTTTTAGTTAGCCATTCATTGATGCGGCT  
AGAAACCCCTACCTTCAAGCCAGCAGTTTCCTTATTTGGTGTGCCTGCTGCAGTGGGGGA

>hsamiR1202

GTGCCAGCTGCAGTGGGGGAG

>MER52A

GTGCCAGCTGCAGTGGGGGA

>CALD1

GTTAGCCATTCATTGATGCGGCTAGAAACCCCTACCTTCAAGCCAGCAGTTTCCTTATTTGGTGTGCCTGCTGCAGT  
GGGGGA

>hsamiR1202

GTGCCAGCTGCAGTGGGGGAG

>MER52A

GTGCCAGCTGCAGTGGGGGA

>CALD1

CCATCTGGGGTTTTAGTTAGCCATTCATTGATGCGGCTAGAAACCCCTACCTTCAAGCCAGCAGTTTCCTTATTTGG

TGTGCCTGCTGCAGTGGGGGA

>hsamir1224\_3p

CCCCACCTCCTCTCCTCAG

>LTR9\_OG\_ERV3\_Otolemur\_garnettii

CACCTCCTCTCCTCA

>GC

CACCTCCTCTCCTCA

>hsamiR1231

GTGTCTGGGCGGACAGCTGC

>L1-2\_TS

GTCAGTGTCTGGGCGGA

>KCNMA1

GTCAGTGTCTGGGCGGA

>hsamiR1231

GTGTCTGGGCGGACAGCTGC

>L1-2\_TS

GTCAGTGTCTGGGCGGA

>KCNMA1

GTCAGTGTCTGGGCGGATATCAT

>hsamiR1246

AATGGATTTTTGGAGCAGG

>MLT1M

TGGATTTTTGGAGCAGGA

>NCOA6

TGGATGTTTGGAGCAGGA

>hsamiR1246

AATGGATTTTTGGAGCAGG

>MLT1M

TTTTTGGAGCAGGAGTGGAC

>HIST1H2BF

TTTTTGGAGCAGGAGCGGAC

>hsamiR1255b2\_3p

AACCACTTTCTTTGCTCATCCA

>TIGGER1

CTCAAGAAACCACTTTCTTTGCTCATCCATAAGGAGCAACTCCTTATCTGTTAGTTTTATCATGAGATTGCAACAATT  
CTCACACCTTCAGTCTGTACTTCTAATTCTAGTTCTTTTGTGTTTTACCTCATCTGCAGTGACTTCCTCTACTGAAG  
TCTTCTACCCCTCAAAGTGATCCACTAGGGTTGGAATTAATTCTTCCAAACTCCTGTTAATATTGTTATTTTGACCT  
CCCACGAATCACAAAAGTTCTTAATAAGGCATCTAGAATGGTCAATCCTT

>TIGD1

CTCAAGAAACCACTTTCTTTGCGCATCCATAAGAAACAACCTCCTCATCTGTTAAAGTTTTATCATGAGATTGCAGCA  
ATTCAGTTACATCTTCAGGCTCTACTTCTAATTCTAGTTCTTTTGTCTATTTCCACCACATCTGCACTTACTTCCTCCACT  
GAAGTCTTGAACCCCTCATAGTCATCAATGAGGGTGGGAATCAACTTCTTCCAAACTCCTGTTAATGTTGACAATTT  
GACCTCCTCCCATGAATCACGAATGTTTTAATGGCATCTAAAATGGTGAATCCTT

>hsamiR1255b2\_3p

AACCACTTTCTTTGCTCATCCA

>TIGGER1

AAGAAACCACTTTCTTT

>DDX21

AAGAAACCACTTTCTTT

>hsamiR1260b

ATCCCACCACTGCCACCAT

>Gypsy-50\_GA-LTR

CGCAATCAGGGCTGAGTTCCTCTGGTCCCCTGGGGTTGAAGCGGGCGGCTGCTGCTCTCCGTTTATCCCACCACTG  
CCACCATTATTGCTACTGTTCCAGCAGGTGCTGCTGGTGGTGTATGGTGATAGTCTGGTGGGGCGGTGGGGCTGCT  
GTTGCTGCTGCTTGGGAGGCCGCAGGAGGGGCAGCAGGGGGCGGTGGAGGGGCTGTAGTGGTGGCAGCAGTG  
GCGGTGGCCTTGGTGTGTTGCCAGCTTTCCTTGCCCCCTGGCCATGCTGTACAAGGCTCAGGAGCTGCAAGGTGC  
TTTCTCTTTCCCGGTCTGAGCTCTCGGCCCTACCTCGTTCATATCGTCCTTACAGCTCAGGTGGTGTGGCGGCAG  
ACAGCGATCCGAGCCCCG

>MAML2

CGCAATCAGGGCTGAGTTCCTCTGGTCCCCTGGGGTTGAAGCGGGCGGCTGCTGCTCTCCGTTTATCCCACCACTG  
CCACCATTATTGCTACTGTTCCAGCAGGTGCTGCTGGTGGTGTATGGTGATAGTCTGGTGGGGCGGTGGGGCTGCT  
GTTGCTGCTGCTTGGGAGGCCGCAGGAGGGGCAGCAGGGGGCGGTGGAGGGGCTGTAGTGGTGGCAGCAGTG  
GCGGTGGCCTTGGTGTGTTGCCAGCTTTCCTTGCCCCCTGGCCATGCTGTACAAGGCTCAGGAGCTGCAAGGTGC  
TTTCTCTTTCCCGGTCTGAGCTCTCGGCCCTACCTCGTTCATATCGTCCTTACAGCTCAGGTGGTGTGGCGGCAG  
ACAGCGATCCGAGCCCCG

>hsamiR1261

ATGGATAAGGCTTTGGCTT

>TIGGER1

AATATAAGTCTGTTTTGTCTACATTGAAAATCAGTTGGAAAGTGTAGCCACCTTCATCATTTATCTTAGCTCTAGATA  
CCTTACTACAGCTTTTCCATCAGCACTTGCTACTTCACTTACACTTTTGTATTACAGAAAAGCTTCTTTCTTCAAC  
CAAATGAACCAACCTCTGTTAGCTTCAAACCTTTCTGCTGCAGCTTCTCACTTCTCTCAGCTTTCATAGAAGTGAAG  
AACTAGAGACTTGCTATGGATAAGGCTTTGGCTTATGGGGATATTGTGGTTGATCTGTTCTATCCAGATGACTGAA  
ACTTTCTCCATAGCAGCAGTGAGGCCATTTTGTCTTCTCTCATTTGCGTGTCTACTGAAGTAACATTTTAAATTTCT  
TCAAGAACTTTT

>TIGD1

AATAGAAGGCTGTTTCATCTACATTGAAAATCTGTTGTTTAGTGTAGCCACCTTCGTCATGATCTTAGCTAAAGCT  
TCTGGATAACTTGCTGCAGCTTCTACATCAGCACTTGTGCTTACCTGTGCTTTTATGTTATGGAAATGGCTTCTT

TCCTTAAACCTCATGAACCAACCTCTGCTAGCTTCAAACCTTTCTTCTGCAGCTTCCACACCTCTCTCAGCTTTCATAG  
AGTTGAAGAGAGTTAGGGCTTTGTTCTGGATTAGGCTTTGGCTTAAGGGAATGTTGCGGCTGGTCTGATCTTCTAT  
CCAGACCACTAAAACCTTCTCCATATCAGCAATAAGGCTGTTTCGCTTTCTTATCATTTCGTGTGTTTCATTGGAGTAGC  
ACTTTTAACTTCCTTCAAGAACTTTT

>hsamiR1263  
ATGGTACCCTGGCATACTGAGT  
>MER34C\_EC  
TGGCATACTGAGTATTTT  
>AGBL1  
CATATTCTCTTTCTTGCC

>hsamiR1263  
ATGGTACCCTGGCATACTGAGT  
>MER34C\_EC  
TGGCATACTGAGTATTTT  
>AGBL1  
TGGCATACTGAGTCTTTT

>hsamiR1268a  
CGGGCGTGGTGGTGGGGG  
>AluYc2\_Repetitive\_sequence\_Homo\_sapiens  
AAAAGTTAGCCGGGCGTGGTGGTGGGGGCCTGTGGTCCCAGCTACTTTGGAGGCTGAGG  
>AMBRA1  
AAAATTAGCCGGGCGTGGTGGTGGGCTCCCGTAGTCCCAGCTACTTGGGAAGCTGAGG

>hsamiR1268a  
CGGGCGTGGTGGTGGGGG  
>AluYc2\_Repetitive\_sequence\_Homo\_sapiens  
AAAATTAGTCCAGCGTGGTGGTGGGTGCCTGTGGTCCCAGCTACTTGGGAGGCTGAGG  
>AMBRA1  
AAAATTAGCCGGGCGTGGTGGTGGGCTCCCGTAGTCCCAGCTACTTGGGAAGCTGAGG

>hsamiR1268a  
CGGGCGTGGTGGTGGGGG  
>AluYc2\_Repetitive\_sequence\_Homo\_sapiens  
AAAAGTTAGCCGGGCGTGGTGGTGGGGGCCTGTGGTCCCAGCTACTTTGGAGGCTGAGGTGGAAGGATCACCTG  
AGCCCAGGAGGTGGAGGCTGCAGTAAGCTTAGAT  
>CR388372.6  
AAAATTAGCCAGGCGTGGTGGTGGGCGCCTGTAGTCCCAGCTACTTGGGAGGCTGAGGCAAGAATCACTTGAA  
CCCGGGAGGTGGAGGTTGCAGTGAGCTGAGAT

>hsamiR1268a  
CGGGCGTGGTGGTGGGGG  
>AluYc2\_Repetitive\_sequence\_Homo\_sapiens  
AAAATTAGTCCAGCGTGGTGGTGGGTGCCTGTGGTCCCAGCTACTTGGGAGGCTGAGG  
>CR388372.6  
AAAATTAGCCAGGCGTGGTGGTGGGCGCCTGTAGTCCCAGCTACTTGGGAGGCTGAGG

>hsamiR1268a  
CGGGCGTGGTGGTGGGG  
>AluYc2\_Repetitive\_sequence\_Homo\_sapiens  
AAAAGTTAGCCGGGCGTGGTGGTGGGGCCTGTGGTCCCAGCTACTTTGGAGGCTGAGGT  
>BX000360.1  
AAAAATTAGCTGGGCGTGGTGGTGCATGCCTGTAATCCCAGCTACTTGGGAGGCGGAGGT

>hsamiR1268a  
CGGGCGTGGTGGTGGGG  
>AluYc2\_Repetitive\_sequence\_Homo\_sapiens  
AAAAGTTAGCCGGGCGTGGTGGTGGGGCCTGTGGTCCCAGCTACTTTGGAGGCTGAGGT  
>CR759942.1  
AAAAATTAGCTGGGCGTGGTGGTGCATGCCTGTAATCCCAGCTACTTGGGAGGCGGAGGT

>hsamiR1268a  
CGGGCGTGGTGGTGGGG  
>AluYc2\_Repetitive\_sequence\_Homo\_sapiens  
TAAAAAAGAAAAATTAGTCCAGCGTGGTGGTGGGTGCCTGTGGTCCCAGCTACTTGGGAGGCTGAGG  
>AC074378.3  
TAAAAATACAAAAATTAGTTGGGCGTGGTGGTGCATGCCTGTAATCCCAGCTACTTGGGAGGCTGAGG

>hsamiR1268a  
CGGGCGTGGTGGTGGGG  
>AluYc2\_Repetitive\_sequence\_Homo\_sapiens  
GGGCGTGGTGGTGGGGCCTGTGGTCCCAGCTACTTTGGAGGCTGAGG  
>AC074378.3  
GGGCGTGGTGGTGCATGCCTGTAATCCCAGCTACTTGGGAGGCTGAGG

>hsamiR1268a  
CGGGCGTGGTGGTGGGG  
>AluYc2\_Repetitive\_sequence\_Homo\_sapiens  
AAAAGTTAGCCGGGCGTGGTGGTGGGGCCTGTGGTCCCAGCTACTTTGGAGGCTGAGGT  
>BX119924.2  
AAAAATTAGCTGGGCGTGGTGGTGCATGCCTGTAATCCCAGCTACTTGGGAGGCGGAGGT

>hsamiR1269a  
CTGGACTGAGCCGTGCTACTGG  
>MLT2B3  
ACTGAGCCGTGCTACTGGCTTCCCTGGTC  
>TLN2  
ACTGAGCCGTGCTCTGCCTTCCCGGTC

>hsamiR1271\_3p  
AGTGCCTGCTATGTGCCAGGCA  
>L2B  
CTGCTATGTGCCAGGCA  
>SMYD5  
CTGCTATGTGCCAGGCA



>hsamiR1273a

GGGCGACAAAGCAAGACTCTTTCTT

>AluS

AGGAGTTCGAGACCAGCCTGGCCAACATAGTGAAACCCATCTCTACTAAAAATACAAAAATTAGCCGGGCGTGGT  
GGCGCTCGCCTATAATCCCAGCTACTCAGCGGGCTGAGGCAGGAGAATTGCTTGAACCCGGGTGGTGGAGGTTG  
CAGTGAGCCAAGATTGCGCCACTGCACTCCAGCCTGGGCGACAAAGCAAGACTCTTT

>AL365202.1

AGGAGTTCAGTCCAGCTTGGGCAACATGGTCAAACCTGTCTCTACTAAAAATACAAAAATTAGCCAGACATGGT  
GGCACATGCCCGTAATCCCAGCTACTTGGGAGGCTGAGGCATGAGAATTACTTGAACCCAGAAGGCAGAGGTTGC  
AGTGAGCCAAGATGGTGCCACTGTACTCCAGCCTGGGCAACAAAGCAAGACTCTTT

>hsamiR1273a

GGGCGACAAAGCAAGACTCTTTCTT

>AluS

AAAAATACAAAAATTAGCCGGGCGTGGTGGCGCTCGCCTATAATCCCAGCTACTCAGCGGGCTGAGGCAGGAGA  
ATTGCTTGAACCCGGGTGGTGGAGGTTGCAGTGAGCCAAGATTGCGCCACTGCACTCCAGCCTGGGCGACAAAGC  
AAGACTCT

>AC092964.1

AAAAATACAATAATTAGCCGGGTGTGGTGGTGCATGCCTGTAATCCCAGCTACTCAGGAGGCTGAGGCAGGAGA  
ATTGCTTGACCCGGGAGACGCTGTAGTGAGCCGAGACTGTGCCACTGCACTCCAGCCTGGGCGACAGAGCAAG  
ACTCT

>hsamiR1273a

GGGCGACAAAGCAAGACTCTTTCTT

>AluS

GGCTGAGGCAGGAGAATTGCTTGAACCCGGGTGGTGGAGGTTGCAGTGAGCCAAGATTGCGCCACTGCACTCCA  
GCCTGGGCGACAAAGCAAGACTC

>SCIMP

GGCTGAGGCAGGAGAATTGCTTGAACCCAGGAGGCGGAGGCTGCAGTGAGCCGAGATCGTGCCAATGCACTCCA  
GCCTGGGCGACAGAGCAAGACTC

>hsamiR1273a

GGGCGACAAAGCAAGACTCTTTCTT

>AluS

CCCATCTCTACTAAAAATACAAAAATTAGCCGGGCGTGGTGGCGCTCGCCTATAATCCCAGCTACTCAGCGGGCTG  
AGGCAGGAGAATTGCTTGAACCCGGGTGGTGGAGGTTGCAGTGAGCCAAGATTGCGCCACTGCACTCCAGCCTG  
GGCGACAAAGCAAGACTC

>AC092067.1

CCCATCTCTACTAAAAATATAAAAAATTAGCAGGGCGTGGTGGCGGGCGCCTGTAGTCCCAGCTACTCGGGAGGC  
TGAGGCAGAAGAATGGCATGAACCTGGTAGGCGGAGATTGCAATGAGCTGAGATCGCGCCACTCCACTCCAGCC  
TGGGCGACAGAGCAAGACTC

>hsamiR1273d

GAACCCATGAGGTTGAGGCTGCAGT

>AluSq

CCTGTAATCCCAGCTACTCGGTAGGCTGAGGTAGGAGAATCGCTTGAACCCATGAGGTTGAGGCTGCAGTGAGCC  
AAGATCGTGCCACTGCACTTCAGCCTGGGTGACA

>BEND2  
CCTGTCATCCCAGCTACTGGGAAGGCTGAGGTGGAAGAATTGCTTGAGTCCAAGAGGTTGAGGCTGCAGTGAGCT  
GTGATCATGCCACTGCACTCCAGCCTGGGTGACA

>hsamiR1273d  
GAACCCATGAGGTTGAGGCTGCAGT  
>AluSq  
GCACCTGTAATCCCAGCTACTCGGTAGGCTGAGGTAGGAGAATCGCTTGAACCCATGAGGTTGAGGCTGCAGTGA  
GCCAAGATCGTGCCACTGCACTTCAGCCTGG  
>SLC35E3  
GCACCTGTAGTCCCAGCTACTGGGGAGGTTGAGGCAGGAGGATTGCTTGAGCCCAGGAGGCTGAGGCTGCAGTG  
AGCCATGATTGTGCCACTGCATTCCAGCCTGG

>hsamiR1277\_3p  
TACGTAGATATATATGTATTTT  
>EnSpm-8\_HM  
TATACGTAGATATATATGTATTTT  
>AC006035.2  
TATACGTACGTATATATGTATTTT

>hsamiR1285\_5p  
GATCTCACTTTGTTGCCCAGG  
>AluJ  
TTTTTTTTTTTTTCTTGGGACACAGTCTCACTCTTTTGGCCAGGCTGGAGTGCAG  
>DOCK4  
TTTTTCTTTTTCTTTGAGACACAGTCTCGCTTTGTTGCCCAGGCTGGAGTGCAG

>hsamiR1285\_5p  
GATCTCACTTTGTTGCCCAGG  
>AluJ  
TCTCACTTTGTTGCCCAGGCTGG  
>DOCK4  
TCTCGCTTTGTTGCCCAGGCTGG

>hsamiR1285\_3p  
TCTGGGCAACAAAGTGAGACCT  
>AluJb  
GAGACCAATCTGGGCAACAAAGTGAGACC  
>SLC3A2  
T

>hsamiR1289  
TGGAGTCCAGGAATCTGCATTTT  
>MER5A  
TGGAGTCCAGGAATC  
>ARMC9  
TGGAGTCCAGGAATC

>hsamiR1291  
TGGCCCTGACTGAAGACCAGCAGT  
>AAYZ01506329.1\_1224x1089\_RF00410\_SNORA2  
CCTGACTGAAGACCAG  
>DNHD1  
CCTGACTGAAGACCAG

>hsamiR1302  
TTGGGACATACTTATGCTAAA  
>MER53  
GTTTGGGACATACTT  
>PHC3  
GTTTGGGACATACTT

>hsamiR1302  
TTGGGACATACTTATGCTAAA  
>MER53  
GTTTGGGACATACTT  
>PHC3  
GTTTGGGACATACTTGACTGCTGTGTG

>hsamiR1303  
TTTAGAGACGGGGTCTTGCTCT  
>PB1D11  
AGAGACGGGGTCTTGCTCTGTTGCCAGGCT  
>STXBP2  
AGAGACGGGGTCTTGCTCTGTACCCAGGCT

>hsamiR1303  
TTTAGAGACGGGGTCTTGCTCT  
>PB1D11  
TTTTAGAGACGGGGTCTTGCTCTGTTGCCAGGCT  
>KATNAL2  
TTTTTGAGACGGAGTCTTGCTCTGTCGCCAGGCT

>hsamiR1321  
CAGGGAGGTGAATGTGAT  
>MIRc  
TCAGGGAGGTGAATGTGA  
>C3orf20  
TCAGGGAGGTGAAGGTGA

>hsamiR161\_3p  
CCAGTATTAAGTGTGCTGCTGA  
>AAYZ01253455.1\_1930x1824\_RF00026\_U6  
AACTGTGCTGCTGAA  
>CASC1  
AACTGTGCTGCTGAA

>hsamir161\_3p  
CCAGTATTAAGTGTGCTGCTGA  
>AAYZ01253455.1\_1930x1824\_RF00026\_U6  
AATTATCTCCAGTATTAAGTGTGCTGCTGAA  
>CASC1  
AATTCTCTACCAGCAACAAGTGTGCTGCTGAA

>hsamir161\_3p  
CCAGTATTAAGTGTGCTGCTGA  
>AAYZ01253455.1\_1930x1824\_RF00026\_U6  
TTATCTCCAGTATTAAGTGTGCTGCTG  
>MDGA2  
TTATCTCCAATAGTGTTACCTGTGCTGCTG

>hsamiR1913  
TCTGCCCCCTCCGCTGCTGCCA  
>LTR16\_FC  
CCCCCTCCGCTGCTGCC  
>MEX3B  
CCCCCTCCGCTGCTGCC

>hsamiR1915\_3p  
CCCCAGGGCGACGCGGCGGG  
>CLOXA\_CS\_DNA\_binding\_protein\_Canis\_sp.  
GCCCCGGCCGTGCACCCGTGGGCCCCAGGGCGACGCGGCG  
>TBX1  
GCGCGGGCCGTACGGGTGCGGCCGGGGCGACGCGGCG

>hsamiR1972  
TCAGGCCAGGCACAGTGGCTCA  
>AANU01178229.1\_7254x6952\_RF00100\_7SK  
AGGCCAGGCACAGTGGCTCATGCCTGTAATCCCAGCAATTTGGGAGGCTGAGGCAGGCCGATCACCTGAGGTCA  
GGAGTTCGAGACCAGCCTGGCCAACATAGTGAAACCCTGTCTCTACTAAAAATACAAGAAATTAGCCAGATGTGG  
TGGCATGCACCTGTAATCCCAGCAATTCAGGAGGTTGAGGCAGGAGAAACACTTGAACCCGGGAGGCAGAGATT  
GCA  
>CR788282.2  
AGGCCAGGCACAGTGGCTCACGCCTGTAATCCCAGCACTGTGGGAGGCTGAGGCAGGATCACCTGAGGTCAGGA  
GTTCAAGACCAGCCTGGCCAACATGGTGAAACCCTGACTCTACCAAAAATACAGAAAATAGCCAGGTGTGGTGAT  
GTGCGCCTGTAATCCCAGCTATTTGGGAGGCTGAGGCAGGAGAATCGCTTGAACCCAGGAGACAGAGGTTGCA

>hsamiR1972  
TCAGGCCAGGCACAGTGGCTCA  
>AANU01178229.1\_7254x6952\_RF00100\_7SK  
AGGCCAGGCACAGTGGCTCATGCCTGTAATCCCAGCAATTTGGGAGGCTGAGGCAGGCCGATCACCTGAGGTCA  
GGAGTTCGAGACCAGCCTGGCCAACATAGTGAAACCCTGTCTCTACTAAAAATACAAGAAATTAGCCAGATGTGG  
TGGCATGCACCTGTAATCCCAGCAATTCAGGAGGTTGAGGCAGGAGAAACACTTGAACCCGGGAGGCAGAGATT  
GCA  
>CR388382.1

AGGCCAGGCACAGTGGCTCACGCCTGTAATCCCAGCACTGTGGGAGGCTGAGGCAGGATCACCTGAGGTCAGGA  
GTTCAAGACCAGCCTGGCCAACATGGTGA AACCTGACTCTACAAAAATACAGAAAATAGCCAGGTGTGGTGAT  
GTGCGCCTGTAATCCCAGCTATTTGGGAGGCTGAGGCAGGAGAATCGCTTGAACCCAGGAGACAGAGGTTGCA

>hsamiR1972

TCAGGCCAGGCACAGTGGCTCA

>AANU01178229.1\_7254x6952\_RF00100\_7SK

GGCCAGGCACAGTGGCTCATGCCTGTAATCCCAGCAATTTGGGAGGCTGAGGCAGGCGGATCACCTGAGGTCAG  
GAGTTTCGAGACCAGCCTGGCCAACATAGTGA AACCTGTCTCTACTAAAAATACAAGAAATTAGCCAGATGTGGT  
GGCATGCACCTGTAATCCCAGCAATTCAGGAGGTTGAGGCAGGAGAAACACTTGAACCCGGGAGGCAGAGATTG  
CAGTGAGGTGAGATTGTGCTACTGCACTCCAGCCTGGGCAACAGAGTGAGACT

>TMEM135

GGCCAGGCACAGTGGCTCACACCTGTAATCTCAGCACTTTGGGAGGCCAAGGCAGGTGGATCACTTAAGGCCAAG  
AATTCAAGACCAGCCTGGCTAACATGGTGA AACCTCATCTCTACAAAAATACAAAAATTAGCCAGGCATGGTGGCA  
CAAATCTGTAATCCCAGCTACTCAGGTGGCTGAGGAACAAGAATCGCTTGAACCCGGGAGGTGCAGGTTGTAGTG  
AGCTGAGATCACACCACTGCACTCCAGCCTGGGCAACAAAGCGAGACT

>hsamiR1972

TCAGGCCAGGCACAGTGGCTCA

>AANU01178229.1\_7254x6952\_RF00100\_7SK

GGCCAGGCACAGTGGCTCATGCCTGTAATCCCAGCAATTTGGGAGGCTGAGGCAGGCGGATCACCTGAGGTCAG  
GAGTTTCGAGACCAGCCTGGCCAACATAGTGA AACCTGTCTCTACTAAAAATACAAGAAATTAGCCAGATGTGGT  
GGCATGCACCTGTAATCCCAGCAATTCAGGAGGTTGAGGCAGGAGAAACACTTGAACCCGGGAGGCAGAGATTG  
CAGTGAGGTGAGATTGTGCTACTGCACTCCAGCCTGGGCAACAGAGTGAGACT

>DISC1

GGCCAGGCACAGTGGCTCATGTCTGTAATCCCAGCACTTTGGGAGGCTGAGGAAGGTGGATCACTTGAGGTCAG  
GAGTTTTAGACCAGTCTGGTCAACATGGTAAAACCCCATCTCTACTAAGAATACAAAATTAGCCAGGCATGGTGGC  
GGCACCTGTAATCCCAGCTACTCCGGAGGCTGAGGCAGGAGAATTGCTTGA ACTCGGGAGGCAGAGGTTGCAG  
TGAGCAAGATCGTACCACTGCACTCCAGACTGGGCGACAGAGTGAGACT

>hsamiR1972

TCAGGCCAGGCACAGTGGCTCA

>AANU01178229.1\_7254x6952\_RF00100\_7SK

GCCAGGCACAGTGGCTCATGCCTGTAATCCCAGCAATTTGGGAGGCTGAGGCAGGCGGATCACCTGAGGTCAGG  
AGTTTCGAGACCAGCCTGGCCAACATAGTGA AACCTGTCTCTACTAAAAATACAAGAAATTAGCC

>R3HDM2

GCCAGGCACAGTGGCTCACGCCTGTAATCCCAGCACTCTGGAAGGCCAAGGCAGGTGGATCACCTGAGGTCAGG  
AGTTTGAGGCCAGCCTGGCCAACATGGTGA AACCTCCGTCTCTACTAAAAATACAAAATTAGCC

>hsamiR1972

TCAGGCCAGGCACAGTGGCTCA

>AANU01178229.1\_7254x6952\_RF00100\_7SK

CAGGCCAGGCACAGTGGCTCATGCCTGTAATCCCAGCAATTTGGGAGGCTGAGGCAGGCGGATCACCTGAGGTC  
AGGAGTTTCGAGACCAGCCTGGCCAACATAGTGA AACCC

>UBA1

CAGGCCAGGCACAGTAGCTCACACCTGTAATCCCAGCACTTTGGGAGGCTAAGGCAGATGGATCACCTGAGGTCA  
AGGTTTCGAGACCAGCCTGACCAACATGGTGA AACCC

>hsamiR1972

TCAGGCCAGGCACAGTGGCTCA

>AANU01178229.1\_7254x6952\_RF00100\_7SK

GGCCAGGCACAGTGGCTCATGCCTGTAATCCCAGCAATTTGGGAGGCTGAGGCAGGCGGATCACCTGAGGTCAG  
GAGTTCGAGACCAGCCTGGCCAACATAGTGAAACCCTGTCTCTACTAAAAATACAAGAAATTAGCCAGATGTGGT  
GGCATGCACCTGTAATCCCAGCAATTCAGGAGGTTGAGGCAGGAGAAACACTTGAACCCGGGAGGCAGAGATTG  
CAGTGAGGTGAGATTGTGCTACTGCACTCCAGCCTGGG

>AL161915.1

GGCCAGGCGCAGTGGCTCACGCCTGTAATCCCAGCACTTTGGGAAGCTGAGGCAGGTGGACTGCTTGAGGCCAG  
AAGTTCAAAACACTAGTCTGGCCAACATGGCGAAACTCCATCTCTACTAAAAATACAAAATCAGCTGGGCATGGTGG  
CACATGCCTGTAATCCCAGTTACTCGGGAGGCTGAGGCAGGAGAAATAGCTTGAACCCAGGAGGCAGAGGTTGCA  
GTGAGCCGAGATGGTGCCACTGCACTCCAGCCTGGG

>hsamiR1972

TCAGGCCAGGCACAGTGGCTCA

>AANU01178229.1\_7254x6952\_RF00100\_7SK

GGCCAGGCACAGTGGCTCATGCCTGTAATCCCAGCAATTTGGGAGGCTGAGGCAGGCGGATCACCTGAGGTCAG  
GAGTTCGAGACCAGCCTGGCCAACATAGTGAAACCCTGTCTCTACTAAAAATACAAGAAATTAGCCAGATGTGGT  
GGCATGCACCTGTAATCCCAGCAATTCAGGAGGTTGAGGCAGGAGAAACACTTGAACCCGGGAGGCAGAGATTG  
CAGTGAGGTGAGATTGTGCTACTGCACTCCAGC

>PDLIM5

GGCCAGGCACGGTGGCTCACGCCTGTAATCTTAGCACTTTGGGAGGCCGAGGTGGGCAGATCACCTGAGGTCGG  
GAGTTC AAGACCAGCCTGACCAACATAGGGAAACTTGGTCTCTACTAAAAATACAAAATTAGCCAGGCGTGGTGG  
CACATGCCTGTAATCCCAGCTACTCGGGAGGCTGAGGCAGGAGAAATCGCTTGAACCTCGGGAGATGGAGGTTGTG  
GTGAGCCGAGATTGCGCCACTGCACTCCAGC

>hsamiR1972

TCAGGCCAGGCACAGTGGCTCA

>AANU01178229.1\_7254x6952\_RF00100\_7SK

GGCCAGGCACAGTGGCTCATGCCTGTAATCCCAGCAATTTGGGAGGCTGAGGCAGGCGGATCACCTGAGGTCAG  
GAGTTCGAGACCAGCCTGGCCAACATAGTGAAACCCTGTCTCTACTAAAAATACAAGAAATTAGCCAGATGTGGT  
GGCATGCACCTGTAATCCCAGCAATTCAGGAGGTTGAGGCAGGAGAAACACTTGAACCCGGGAGGCAGAGATTG  
CAGTGAGGTGAGATTGTGCTACTGCACTCCAGCCTGGGCAACA

>AL365202.1

GGCCAGGCACATTGGCTCATGCCTGTAATCTCAGTGCTTTGGGAGGCCAAGGCAGGAGAACTGCTTGACACTAGG  
AGTTC AAGTCCAGCTTGGGCAACATGGTGAAACCCTGTCTCTACTAAAAATACAAAATTAGCCAGACATGGTGGC  
ACATGCCCATAATCCCAGCTACTTGGGAGGCTGAGGCATGAGAATTACTTGAACCCAGAAGGCAGAGGTTGCAGT  
GAGCCAAGATGGTGCCACTGTACTCCAGCCTGGGCAACA

>hsamiR1972

TCAGGCCAGGCACAGTGGCTCA

>AANU01178229.1\_7254x6952\_RF00100\_7SK

GCACAGTGGCTCATGCCTGTAATCCCAGCAATTTGGGAGGCTGAGGCAGGCGGATCACCTGAGGTCAGGAGTTC  
GAGACCAGCCTGGCCAACATAGTGAAACCCTGTCTCTACTAAAAATACAAGAAATTAGCCAGATGTGGTGGCATG  
CACCTGTAATCCCAGCAATTCAGGAGGTTGAGGCAGGAGAAACACTTGAACCCGGGAGGCAGAGATTGCA

>AL844220.2

GCACAGTGGCTCACGCCTGTAATCCCAGCACTGTGGGAGGCTGAGGCAGGATCACCTGAGGTCAGGAGTTCAAG  
ACCAGCCTGGCCAACATGGTCAAACCCTGACTCTACCAAAAATACAGAAAATAGCCAGGTGTGGTGATGTGCGCC  
TGTAATCCCAGCTATTTGGGAGGCTGAGGCAGGAGAATCGCTTGAACCCAGGAGACAGAGGTTGCA

>hsamiR1972

TCAGGCCAGGCACAGTGGCTCA

>AANU01178229.1\_7254x6952\_RF00100\_7SK

AGGCCAGGCACAGTGGCTCATGCCTGTAATCCCAGCGATTTGGGAGGCTGAGGCAGGCGGACCACCTGAGGTCA  
GGAGTTCGAGACCAGCCTGGCCAACATAGTGAAACCCTGTCTCTACTAAAAATACAAGAAATTAGCCAGATGTGG  
TGGCACGCAGCTGTAATCCCAGCAATTCAGGAGGTTGAGGCAGGAGAAACACTTGAACCCGGGAGGCAGAGATT  
GCA

>CR788282.2

AGGCCAGGCACAGTGGCTCACGCCTGTAATCCCAGCACTGTGGGAGGCTGAGGCAGGATCACCTGAGGTCAGGA  
GTTCAAGACCAGCCTGGCCAACATGGTCAAACCCTGACTCTACCAAAAATACAGAAAATAGCCAGGTGTGGTGAT  
GTGCGCCTGTAATCCCAGCTATTTGGGAGGCTGAGGCAGGAGAATCGCTTGAACCCAGGAGACAGAGGTTGCA

>hsamiR1972

TCAGGCCAGGCACAGTGGCTCA

>AANU01178229.1\_7254x6952\_RF00100\_7SK

AGGCCAGGCACAGTGGCTCATGCCTGTAATCCCAGCGATTTGGGAGGCTGAGGCAGGCGGACCACCTGAGGTCA  
GGAGTTCGAGACCAGCCTGGCCAACATAGTGAAACCCTGTCTCTACTAAAAATACAAGAAATTAGCCAGATGTGG  
TGGCACGCAGCTGTAATCCCAGCAATTCAGGAGGTTGAGGCAGGAGAAACACTTGAACCCGGGAGGCAGAGATT  
GCA

>CR388382.1

AGGCCAGGCACAGTGGCTCACGCCTGTAATCCCAGCACTGTGGGAGGCTGAGGCAGGATCACCTGAGGTCAGGA  
GTTCAAGACCAGCCTGGCCAACATGGTCAAACCCTGACTCTACCAAAAATACAGAAAATAGCCAGGTGTGGTGAT  
GTGCGCCTGTAATCCCAGCTATTTGGGAGGCTGAGGCAGGAGAATCGCTTGAACCCAGGAGACAGAGGTTGCA

>hsamiR1972

TCAGGCCAGGCACAGTGGCTCA

>AANU01178229.1\_7254x6952\_RF00100\_7SK

GGCCAGGCACAGTGGCTCATGCCTGTAATCCCAGCGATTTGGGAGGCTGAGGCAGGCGGACCACCTGAGGTCAG  
GAGTTCGAGACCAGCCTGGCCAACATAGTGAAACCCTGTCTCTACTAAAAATACAAGAAATTAGCCAGATGTGGT  
GGCACGCAGCTGTAATCCCAGCAATTCAGGAGGTTGAGGCAGGAGAAACACTTGAACCCGGGAGGCAGAGATTG  
CAGTGAGGTGAGATTGTGCTACTGCACTCCAGCCTGGGCAACAGAGTGAGACTC

>TMEM135

GGCCAGGCACAGTGGCTCACACCTGTAATCTCAGCACTTTGGGAGGCCAAGGCAGGTGGATCACTTAAGGCCAAG  
AATTCAAGACCAGCCTGGCTAACATGGTCAAACCCTCATCTCTACAAAATACAAAATTAGCCAGGCATGGTGGCA  
CAAATCTGTAATCCCAGCTACTCAGGTGGCTGAGGAACAAGAATCGCTTGAACCCGGGAGGTGCAGGTTGTAGTG  
AGCTGAGATCACACCACTGCACTCCAGCCTGGGCAACAAAGCGAGACTC

>hsamiR1972

TCAGGCCAGGCACAGTGGCTCA

>AANU01178229.1\_7254x6952\_RF00100\_7SK

GGCCAGGCACAGTGGCTCATGCCTGTAATCCCAGCGATTTGGGAGGCTGAGGCAGGCGGACCACCTGAGGTCAG  
GAGTTCGAGACCAGCCTGGCCAACATAGTGAAACCCTGTCTCTACTAAAAATACAAGAAATTAGCCAGATGTGGT

GGCACGCAGCTGTAATCCCAGCAATTCAGGAGGTTGAGGCAGGAGAAACACTTGAACCCGGGAGGCAGAGATTG  
CAGTGAGGTGAGATTGTGCTACTGCACTCCAGCCTGGGCAACAGAGTGAGACTC

>DISC1

GGCCAGGCACAGTGGCTCATGTCTGTAATCCCAGCACTTTGGGAGGCTGAGGAAGGTGGATCACTTGAGGTCAG  
GAGTTTTAGACCAGTCTGGTCAACATGGTAAAACCCCATCTCTACTAAGAATACAAAATTAGCCAGGCATGGTGGC  
GGGCACCTGTAATCCCAGCTACTCCGGAGGCTGAGGCAGGAGAATTGCTTGAACCTCGGGAGGCAGAGGTTGCAG  
TGAGCAAGATCGTACCACTGCACTCCAGACTGGGCGACAGAGTGAGACTC

>hsamiR1972

TCAGGCCAGGCACAGTGGCTCA

>AANU01178229.1\_7254x6952\_RF00100\_7SK

GCCAGGCACAGTGGCTCATGCCTGTAATCCCAGCGATTTGGGAGGCTGAGGCAGGCGGACCACCTGAGGTCAGG  
AGTTTCGAGACCAGCCTGGCCAACATAGTGAAACCTGTCTCTACTAAAAATACAAGAAATTAGCC

>R3HDM2

GCCAGGCACAGTGGCTCACGCCTGTAATCCCAGCACTCTGGAAGGCCAAGGCAGGTGGATCACCTGAGGTCAGG  
AGTTTGAGGCCAGCCTGGCCAACATGGTGAAACTCCGTCTCTACTAAAAATACAAAATTAGCC

>hsamiR1972

TCAGGCCAGGCACAGTGGCTCA

>AANU01178229.1\_7254x6952\_RF00100\_7SK

CAGGCCAGGCACAGTGGCTCATGCCTGTAATCCCAGCGATTTGGGAGGCTGAGGCAGGCGGACCACCTGAGGTC  
AGGAGTTTCGAGACCAGCCTGGCCAACATAGTGAAACCC

>UBA1

CAGGCCAGGCACAGTAGCTCACACCTGTAATCCCAGCACTTTGGGAGGCTAAGGCAGATGGATCACCTGAGGTCA  
AGGGTTTCGAGACCAGCCTGACCAACATGGTGAAACCC

>hsamiR1972

TCAGGCCAGGCACAGTGGCTCA

>AANU01178229.1\_7254x6952\_RF00100\_7SK

GGCCAGGCACAGTGGCTCATGCCTGTAATCCCAGCGATTTGGGAGGCTGAGGCAGGCGGACCACCTGAGGTCAG  
GAGTTTCGAGACCAGCCTGGCCAACATAGTGAAACCTGTCTCTACTAAAAATACAAGAAATTAGCCAGATGTGGT  
GGCACGCAGCTGTAATCCCAGCAATTCAGGAGGTTGAGGCAGGAGAAACACTTGAACCCGGGAGGCAGAGATTG  
CAGTGAGGTGAGATTGTGCTACTGCACTCCAGCCTGGG

>AL161915.1

GGCCAGGCGCAGTGGCTCACGCCTGTAATCCCAGCACTTTGGGAAGCTGAGGCAGGTGGACTGCTTGAGGCCAG  
AAGTTCAAAACTAGTCTGGCCAACATGGCGAAACTCCATCTCTACTAAAAATACAAAATCAGCTGGGCATGGTGG  
CACATGCCTGTAATCCCAGTTACTCGGGAGGCTGAGGCAGGAGAATAGCTTGAACCCAGGAGGCAGAGGTTGCA  
GTGAGCCGAGATGGTGCCACTGCACTCCAGCCTGGG

>hsamiR1972

TCAGGCCAGGCACAGTGGCTCA

>AANU01178229.1\_7254x6952\_RF00100\_7SK

GGCCAGGCACAGTGGCTCATGCCTGTAATCCCAGCGATTTGGGAGGCTGAGGCAGGCGGACCACCTGAGGTCAG  
GAGTTTCGAGACCAGCCTGGCCAACATAGTGAAACCTGTCTCTACTAAAAATACAAGAAATTAGCCAGATGTGGT  
GGCACGCAGCTGTAATCCCAGCAATTCAGGAGGTTGAGGCAGGAGAAACACTTGAACCCGGGAGGCAGAGATTG  
CAGTGAGGTGAGATTGTGCTACTGCACTCCAGC

>PDLIM5



GGCCAGGCACGGTGGCTCACGCCTGTAATCTTAGCACTTTGGGAGGCCGAGGTGGGCAGATCACCTGAGGTCGG  
GAGTTCAAGACCAGCCTGACCAACATAGGGAACTTGGTCTCTACTAAAAATACAAAATTAGCCAGGCGTGGTGG  
CACATGCCTGTAATCCCAGCTACTCGGGAGGCTGAGGCAGGAGAATCGCTTGAACCTCGGGAGATGGAGGTTGTG  
GTGAGCCGAGATTGCGCCACTGCACTCCAGC

>hsamiR1972

TCAGGCCAGGCACAGTGGCTCA

>AANU01178229.1\_7254x6952\_RF00100\_7SK

GGCCAGGCACAGTGGCTCATGCCTGTAATCCCAGCGATTTGGGAGGCTGAGGCAGGCGGACCACCTGAGGTCAG  
GAGTTTCGAGACCAGCCTGGCCAACATAGTGAAACCCTGTCTCTACTAAAAATACAAGAAATTAGCCAGATGTGGT  
GGCACGCAGCTGTAATCCCAGCAATTCAGGAGGTTGAGGCAGGAGAAACACTTGAACCCGGGAGGCAGAGATTG  
CAGTGAGGTGAGATTGTGCTACTGCACTCCAGCCTGGGCAACA

>AL365202.1

GGCCAGGCACATTGGCTCATGCCTGTAATCTCAGTGCTTTGGGAGGCCAAGGCAGGAGAAGTCTTGACACTAGG  
AGTTCAAGTCCAGCTTGGGCAACATGGTGAAACCCTGTCTCTACTAAAAATACAAAATTAGCCAGACATGGTGGC  
ACATGCCCGTAATCCCAGCTACTTGGGAGGCTGAGGCATGAGAATTACTTGAACCCAGAAGGCAGAGGTTGCAGT  
GAGCCAAGATGGTGCCACTGTACTCCAGCCTGGGCAACA

>hsamiR1972

TCAGGCCAGGCACAGTGGCTCA

>AANU01178229.1\_7254x6952\_RF00100\_7SK

GCACAGTGGCTCATGCCTGTAATCCCAGCGATTTGGGAGGCTGAGGCAGGCGGACCACCTGAGGTCAGGAGTTC  
GAGACCAGCCTGGCCAACATAGTGAAACCCTGTCTCTACTAAAAATACAAGAAATTAGCCAGATGTGGTGGCAGC  
CAGCTGTAATCCCAGCAATTCAGGAGGTTGAGGCAGGAGAAACACTTGAACCCGGGAGGCAGAGATTGCA

>AL844220.2

GCACAGTGGCTCACGCCTGTAATCCCAGCACTGTGGGAGGCTGAGGCAGGATCACCTGAGGTCAGGAGTTCAAG  
ACCAGCCTGGCCAACATGGTGAAACCCTGACTCTACCAAAAATACAGAAAATAGCCAGGTGTGGTGATGTGCGCC  
TGTAATCCCAGCTATTTGGGAGGCTGAGGCAGGAGAATCGCTTGAACCCAGGAGACAGAGGTTGCA

>hsamiR297

ATGTATGTGTGCATGTGCATG

>ERV1\_N6\_I\_DR\_ERV1\_Danio\_rerio

TGTATGTATGTGTGCAT

>LRRC39

TGTATGTATGTGTGCAT

>hsamir301a\_5p

GCTCTGACTTTATTGCACTACT

>LINE1-21\_ZM

GCTCTGACTTTATTG

>LPL

GCTCTGACTTTATTG

>hsamir301a\_5p

GCTCTGACTTTATTGCACTACT

>LINE1-21\_ZM

CTCTGACTTTATTGCACT

>PGR  
CTCTGACTTTATTGAACT

>hsamir301a\_5p  
GCTCTGACTTTATTGCACTACT  
>LINE1-21\_ZM  
ATGCTCTGACTTTATT  
>KIAA1731  
ATGCTCTGACTTTATT

>hsamir301a\_5p  
GCTCTGACTTTATTGCACTACT  
>LINE1-21\_ZM  
ATGCTCTGACTTTATT  
>KIAA1731  
ATGCTCTGACTTTATTAC

>hsamir301a\_5p  
GCTCTGACTTTATTGCACTACT  
>LINE1-21\_ZM  
CGAATGCTCTGACTTTATTGCA  
>BLK  
CGAACGCTCGTGACTTTATTGCA

>hsamir302a\_5p  
ACTTAAACGTGGATGTACTTGCT  
>THER1\_SINE\_Mammalia  
AACGTGGATGTACTT  
>TBK1  
AACGTGGATGTACTT

>hsamir302c\_3p  
TAAGTGCTTCCATGTTTCAGTGGA  
>THER1\_SINE\_Mammalia  
CCATGTTTCAGTGGA  
>RTN4IP1  
CCATGTTTCAGTGGA

>hsamir302c\_5p  
TTTAACATGGGGGTACCTGCTG  
>THER1\_SINE\_Mammalia  
GGGGGTACCTGCTGTGTG  
>SYNGR1  
GGGGGTACCTGCTGGGTG

>hsamir302d\_5p  
ACTTTAACATGGAGGCACTTGC  
>THER1\_SINE\_Mammalia

TACTTTAACATGGAG  
>CDYL  
TACTTTAACATGGAG

>hsamir302f  
TAATTGCTTCCATGTTT  
>THER1\_SINE\_Mammalia  
AATTGCTTCCATGTTTA  
>PIWIL3  
AATTGCTTCCATGTTTA

>hsamiR3150a\_3p  
CTGGGGAGATCCTCGAGGTTGG  
>GRANDE1\_ZD\_I  
GCCAAGGCTGGGGAGATCCTCGAGGTTGGC  
>FRMPD2  
GCCAAAGTAGGTGAGTTCCTCGAGGTTGGC

>hsamiR3171  
AGATGTATGGAATCTGTATATATC  
>MuDR\_1\_NV\_MuDR\_Nematostella\_vectensis  
GGAATCTGTATATAT  
>NR3C2  
GGAATCTGTATATAT

>hsamiR3171  
AGATGTATGGAATCTGTATATATC  
>MuDR\_1\_NV\_MuDR\_Nematostella\_vectensis  
TATAGAGATGTATGGAATCTGTAT  
>XPO1  
TATACAAATTTATGGAATCTGTAT

>hsamiR3195  
CGCGCCGGGCCCGGTT  
>TguERVK1N3\_I\_ERV2\_Estrildidae  
TGGTGGCCGTGGGCGTCCGGGACAGGCTCTGGGTCACTGCGCCGGCCGCGCCTTTGGGCAGCCCGGTGGGGGT  
CCGGGGGCGGGCGGCGGGACGGCGGCCGGGCTGGGCAGCGCCCTTGCCATAGTTGGCCGATGACCATGCTGG  
CCGCCGTGCTGGCCGGGCCGCTGGCCGCCAGGGTCTGCGCCGCCGGGGCGCCGCCTGCACCACCCTCTGGGC  
GACTCGGCCTTGACCCCGCGCCGGCGCCGAGCCGCCGCGCCGGGCCCGGGTTGGCCGCTGACCCCGCGGG  
GCCCGCGGCGCCGGGGCGGGGGCGGGGGTGCCTCGGCGCTGCCCGGCTTCTGGGCGGCGGGGGGGCGG  
CACGGCGGGCGCGCGGTTCGGGGTCCGGCGGGGTGGCCGGCGGCCGGCCAGAGTGGCGGGCGCGGGGG  
GTGGCGGGGGCGGGGGCGGCGGGGGCGGCGGGG  
>TAF4  
TGGTGGCCGTGGGCGTCCGGGACAGGCTCTGGGTCACTGCGCCGGCCGCGCCTTTGGGCAGCCCGGTGGGGGT  
CCGGGGGCGGGCGGCGGGACGGCGGCCGGGCTGGGCAGCGCCCTTGCCATAGTTGGCCGATGACCATGCTGG  
CCGCCGTGCTGGCCGGGCCGCTGGCCGCCAGGGTCTGCGCCGCCGGGGCGCCGCCTGCACCACCCTCTGGGC  
GACTCGGCCTTGACCCCGCGCCGGCGCCGAGCCGCCGCGCCGGGCCCGGGTTGGCCGCTGACCCCGCGGG  
GCCCGCGGCGCCGGGGCGGGGGCGGGGGTGCCTCGGCGCTGCCCGGCTTCTGGGCGGCGGGGGGGCGG

CACGGCGGGCGCGGGTCCGGGGTCCGGCGGGGTGGCCGGGCGGCCGGGCCAGAGTGGCGGGCGCGGGGG  
GTGGCGGGGGCGGGGCGGCGGGGGCGGCGGGG

>hsamiR3195

CGCGCCGGGCCCCGGTT

>TguERVK1N3\_I\_ERV2\_Estrilidae

TGGTGGCCGTGGGCGTCCGGGACAGGCTCTGGGTCACTGCGCCGGCCGCGCCTTTGGGCAGCCCGGTGGGGGTC  
CCGGGGGCGGGCGGCGGGACGGCGGCCGGGCTGGGCAGCGCCCCTTGCATAGTTGGCCGATGACCATGCTGG  
CCGCCGTGCTGGCCGGGCGGCTGGCCGCCAGGGTCTGCGCCGCCGGGGCGCCGCCTGCACCACCTCTGGGC  
GACTCGGCCTTGACCCCCGCGCCGGCGCCGAGCCGCCCGCGCCGGGCCCGGGTTGGCCGCTGACCCCCGCGGG  
GCCCCCGCGGCCGGGGCGGGGGCGGGGGCTGCCCCGCGCTGCCCCGTTCTGGGCGGCGGGGGGGCGG  
CACGGCGGGCGCGGGTCCGGGGTCCGGCGGGGTGGCCGGGCGGCCGGGCCAGAGTGGCGGGCGCGGGGG  
GTGGCGGGGGCGGGGCGGCGGGGGCGGCGGGGCGCGGGGGCGAGGGCGCGGGCGGGCGC  
GGGGGGCGCGGCGGCCACGAAGGGGGGCGTCTGGATGACAGTGCCGGGGGCGGCGGGCTTGGGCAGCGG  
CAG

>TAF4

TGGTGGCCGTGGGCGTCCGGGACAGGCTCTGGGTCACTGCGCCGGCCGCGCCTTTGGGCAGCCCGGTGGGGGTC  
CCGGGGGCGGGCGGCGGGACGGCGGCCGGGCTGGGCAGCGCCCCTTGCATAGTTGGCCGATGACCATGCTGG  
CCGCCGTGCTGGCCGGGCGGCTGGCCGCCAGGGTCTGCGCCGCCGGGGCGCCGCCTGCACCACCTCTGGGC  
GACTCGGCCTTGACCCCCGCGCCGGCGCCGAGCCGCCCGCGCCGGGCCCGGGTTGGCCGCTGACCCCCGCGGG  
GCCCCCGCGGCCGGGGCGGGGGCGGGGGCTGCCCCGCGCTGCCCCGTTCTGGGCGGCGGGGGGGCGG  
CACGGCGGGCGCGGGTCCGGGGTCCGGCGGGGTGGCCGGGCGGCCGGGCCAGAGTGGCGGGCGCGGGGG  
GTGGCGGGGGCGGGGCGGCGGGGGCGGCGGGGCGCGGGGGCGAGGGCGCGGGCGGGCGC  
GGGGGGCGCGGCGGCCACGAAGGGGGGCGTCTGGATGACAGTGCCGGGGGCGGCGGGCTTGGGCAGCGG  
CAG

>hsamiR325

CCTAGTAGGTGTCCAGTAAGTGT

>LINE2\_Non\_LTR\_retrotransposon\_Eutheria

TAGGTGTCCAGTAAGTGTGT

>MLL

TAGGTGTCCAGTAAATTTTGT

>hsamiR325

CCTAGTAGGTGTCCAGTAAGTGT

>LINE2\_Non\_LTR\_retrotransposon\_Eutheria

TAGGTGTCCAGTAAGTGTGT

>MLL

TAGGTGTCCAGTAAATTTTGTC

>hsamiR3648

AGCCGCGGGGATCGCCGAGGG

>SETARIA1

CGGGGATCGCCGAGG

>RNASEK

CGGGGATCGCCGAGG

>hsamiR3648  
AGCCGCGGGGATCGCCGAGGG  
>SETARIA1  
CGGGGATCGCCGAGG  
>RNASEK  
CGGGGATCGCCGAGGTGC

>hsamiR3648  
AGCCGCGGGGATCGCCGAGGG  
>SETARIA1  
GGGGGAGCCGCGGGGATCGCCGAGGG  
>PDE4C  
GGGGGAGCCGCGCGGGGATCCCCGAGGG

>hsamiR3665  
AGCAGGTGCGGGGCGGCG  
>Copia-8\_TA-I  
CCCAGGCCCCCTGAGGCCGCGGCGGTGGCCGTGGCGGCCGGGGGGCTCCGAGGACCCAAAGGCTGCAGGCCAG  
CGGGGGGCGGCGCGGCGGGCGGCGGCGGCGGCAGCAGCAGCAGGTGCGGGGCGGCGGCCGCGCTGGCCGCTC  
GACTCCGAGCTGCTGTTCTGCTTCTCCAGCTTGCGCACCAGCTCCTGCAGCTTCTTACCTCCAGCTCCGCGTTCA  
CCACCGGCCCCGAGCCCGCTCCAGAGCTGACCCCTGCCGAGGCGCATTTACCTGCTCCGCCATCAT  
>SLAIN1  
CCCAGGCCCCCTGAGGCCGCGGCGGTGGCCGTGGCGGCCGGGGGGCTCCGAGGACCCAAAGGCTGCAGGCCAG  
CGGGGGGCGGCGCGGCGGGCGGCGGCGGCGGCAGCAGCAGCAGGTGCGGGGCGGCGGCCGCGCTGGCCGCTC  
GACTCCGAGCTGCTGTTCTGCTTCTCCAGCTTGCGCACCAGCTCCTGCAGCTTCTTACCTCCAGCTCCGCGTTCA  
CCACCGGCCCCGAGCCCGCTCCAGAGCTGACCCCTGCCGAGGCGCATTTACCTGCTCCGCCATCAT

>hsamiR3686  
ATCTGTAAGAGAAAGTAAATGA  
>L1MEC\_5\_L1M4\_5\_Eutheria  
AGAGAAAGTAAATGAAA  
>WDR60  
AGAGAAAGTAAATGAAA

>hsamiR4326  
TGTTCTCTGTCTCCAGAC  
>Gypsy154\_I\_DR\_Gypsy\_Danio\_rerio  
CTGCTGTTCTCTGTCT  
>DIXDC1  
CTGCTGTTCTCTGTCT

>hsamiR4326  
TGTTCTCTGTCTCCAGAC  
>Gypsy154\_I\_DR\_Gypsy\_Danio\_rerio  
CTGCTGTTCTCTGTCT  
>DIXDC1  
CTGCTGTTCTCTGTCTATA

>hsamiR450a\_3p  
ATTGGGGACATTTTGCATTCAT  
>Ginger1\_6\_HM\_Ginger1\_Hydra\_magnipapillata  
ATTTTGCATTCATAG  
>TRIML2  
ATTTTGCATTCATAG

>hsamiR450a\_5p  
TTTTGCGATGTGTTCCCTAATAT  
>Ginger1\_6\_HM\_Ginger1\_Hydra\_magnipapillata  
TTTGGCGATGTGTTCC  
>SPEN  
TTTGGCGATGTGTTCC

>hsamiR450b\_5p  
TTTTGCAATATGTTCCCTGAATA  
>Ginger1\_6\_HM\_Ginger1\_Hydra\_magnipapillata  
TTATTTTTCGAATATGT  
>TRIO  
TTATTTTTCGAATATGT

>hsamiR501\_5p  
AATCCTTTGTCCCTGGGTGAGA  
>GYPSO\_I\_Gypsy  
TGTCCCTGGGTGAGAG  
>CTPS  
TGTCCCTGGGTGAGAG

>hsamiR501\_5p  
AATCCTTTGTCCCTGGGTGAGA  
>GYPSO\_I\_Gypsy  
TGTCCCTGGGTGAGAG  
>ZNF347  
TGTCCCTGGGTGAGAG

>hsamiR501\_5p  
AATCCTTTGTCCCTGGGTGAGA  
>GYPSO\_I\_Gypsy  
TTGTCCCTGGGTGAGAGT  
>EFTUD2  
TTGTCCCTGGGTGTGAGT

>hsamiR544a  
ATTCTGCATTTTTCAGCAAGTTC  
>MER5A1  
CATTTTTAGCAAGTT  
>GLYR1  
CATTTTTAGCAAGTT

>hsamiR544a  
ATTCTGCATTTTTAGCAAGTTC  
>MER5A1  
TTCTGCATTTTTAGCAAGTTC  
>MAP2  
TTCTGTTTTTTTAGCAAGTTC

>hsamiR544a  
ATTCTGCATTTTTAGCAAGTTC  
>MER5A1  
TTCTGCATTTTTAGCAAGTTC  
>MAP2  
TTCTGTTTTTTTAGCAAGTTCAGCCTTCTTATA

>hsamiR544a  
ATTCTGCATTTTTAGCAAGTTC  
>MER5A1  
GGACCAAGATTCTGCATTTTTAGCAAGTTCTCAAGTGA  
>VGLL4  
GGACTACGATTCTGCATTTCTAACAAAGTTCAGGTGA

>hsamiR544a  
ATTCTGCATTTTTAGCAAGTTC  
>MER5A1  
CTGCATTTTTAGCAAGTT  
>ZNF165  
CTGCATGTTTAGCAAGTT

>hsamiR544a  
ATTCTGCATTTTTAGCAAGTTC  
>MER5A1  
CATTTTTAGCAAGTTCTC  
>SAT1  
CATTTTTAGCAAGTACTC

>hsamiR544a  
ATTCTGCATTTTTAGCAAGTTC  
>MER5A1  
AGATTCTGCATTTTT  
>CYLC1  
AGATTCTGCATTTTT

>hsamiR544a  
ATTCTGCATTTTTAGCAAGTTC  
>MER5A1  
TTCTGCATTTTTAGCAAGTTC  
>SIK1  
TTCTCCATTTTTAGCAAATTC

>hsamiR558  
TGAGCTGCTGTACCAAAAT  
>MLT1C  
CTGCTGTACCAAAAT  
>PPM1F  
CTGCTGTACCAAAAT

>hsamiR558  
TGAGCTGCTGTACCAAAAT  
>MLT1C  
GAGCTGCTGTACCAA  
>SLC25A12  
GAGCTGCTGTACCAA

>hsamiR558  
TGAGCTGCTGTACCAAAAT  
>MLT1C  
GAGCTGCTGTACCAA  
>SLC25A12  
GAGCTGCTGTACCAACGGTGTGGC

>hsamiR558  
TGAGCTGCTGTACCAAAAT  
>MLT1C  
CTGAGCTGCTGTACCAA  
>CEP192  
CTGAGCTGCTGAACCAA

>hsamiR566  
GGGCGCCTGTGATCCCAAC  
>GarnAlu1  
TGGTGGCGGGCGCCTGTGATCCCA  
>AL662867.1  
TGGTGGCGGGCGCCTGTAATCCCA

>hsamiR566  
GGGCGCCTGTGATCCCAAC  
>GarnAlu1  
TGGTGGCTGACGCCTGTAATCCCAGCT  
>AL662867.1  
TGGTGGCGGGCGCCTGTAATCCCAGCT

>hsamiR566  
GGGCGCCTGTGATCCCAAC  
>GarnAlu1  
AAAAATTAGCTAGGCGTGGTGGCGGGCGCCTGTGATCCCACTACTCAGGAGGCTGGGGCAGCAGAATCGCTTG  
AACCCGGGAGGCGAAGGTTGCAGTGAGCCAAGATCGCGCCATTGCACTCCAGCCTGGGTGACAGAGTGAGACTC  
CATCTCAAAAAA



>AC127032.1  
AAAAATTAGCCGGGTGTGGTGGCGGGCGCCTGTAATCCCAGCTACTCGGGAGGCTGAGGCAGGAGAATGGTGTG  
AACCCAGGAGGTGGAGCTTGCAGTGAGCTGAGATCGCACCCTGCACCCCAGCCTGGGCAACAGTGCGAGACTC  
CATCTCAAAAAA

>hsamiR566  
GGGCGCCTGTGATCCCAAC  
>GarnAlu1  
AAAAAATAAGCTGGGTGTGGTGGCTGACGCCTGTAATCCCAGCTAGTCAGGAGGCTGAGACAGGAGAATCGCTT  
GAACCCAGCAGATGGAGGTTGCAGTGAGCCGAATCTCGCTACTGTACTGCAGCCTGGGCAACAGAGTGAGACT  
>AC127032.1  
AAAAAATTAGCCGGGTGTGGTGGCGGGCGCCTGTAATCCCAGCTACTCGGGAGGCTGAGGCAGGAGAATGGTGTG  
GAACCCAGGAGGTGGAGCTTGCAGTGAGCTGAGATCGCACCCTGCACCCCAGCCTGGGCAACAGTGCGAGACT

>hsamiR566  
GGGCGCCTGTGATCCCAAC  
>GarnAlu1  
AAAAATTAGCTAGGCGTGGTGGCGGGCGCCTGTGATCCCAACTACTCAGGAGGCTGGGGCAGCAGAATCGCTTG  
AACCCGGGAGGCCGAAGGTTGCAGTGAGCCAAGATCGCGCCATTGCACTCCAGCCTGGGTGACAGAGTGAGACTC  
CATCTCAAAAAACA  
>AC139677.7  
AAAAATTAGCCGGGTGTGGTGGCGGGCGCCTGTAATCCCAGCTACTCGGGAGGCTGAGGCAGGAGAATGGTGTG  
AACCCAGGAGGTGGAGCTTGCAGTGAGCTGAGATCGCACCCTGCACCCCAGCCTGGGCAACAGTGCGAGACTC  
CATCTCATAAAACA

>hsamiR566  
GGGCGCCTGTGATCCCAAC  
>GarnAlu1  
ACAAACAAACAAAAAATAAGCTGGGTGTGGTGGCTGACGCCTGTAATCCCAGCTAGTCAGGAGGCTGAGACAGG  
AGAATCGCTTGAACCCAGCAGATGGAGGTTGCAGTGAGCCGAATCTCGCTACTGTACTGCAGCCTGGGCAACAG  
AGTGAGACTTGATCTCGTAAAA  
>AC139677.7  
ACAAAAAAAAAAAAAATTAGCCGGGTGTGGTGGCGGGCGCCTGTAATCCCAGCTACTCGGGAGGCTGAGGCAGG  
AGAATGGTGTGAACCCAGGAGGTGGAGCTTGCAGTGAGCTGAGATCGCACCCTGCACCCCAGCCTGGGCAACA  
GTGCGAGACTCCATCTCATAAAA

>hsamiR566  
GGGCGCCTGTGATCCCAAC  
>GarnAlu1  
GCTGGGCACAGTGGCTCATGCCTGTAATCCCAGCACTTTGGGAGGCTGAGACAGGTGGATCACGAGGTCAGGAG  
TTCGAGACCAGCCTGACCAACATGGAGAAACCCATCTCTACTAAAAATACAAAAATTAGCTAGGCGTGGTGGCG  
GGCGCCTGTGATCCCAACTACTCAGGAGGCTGGGGCAGCAGAATCGCTTGAACCCGGGAGGCCGAAGGTTGCAGT  
GAGCCAAGATCGCGCCATTGCACTCCAGCCTGGGTGACAGAGTGAGACTCCATCTCAAAAAACAAACAAAA  
A  
>AC104472.1  
GCTGGGCGCGGTGGCTCACGCCTGTGATCCCCACACTTTGGGAGGAGGAGGTTGGTGGATCACCTGAGGTCAGG  
AGTTCCAGACCAGCCTGGCCAATATGGTGAACCCCGTCTCTACTAAAAATACAAAAATAGCTGGGCGTGGTGG

CGGGAGCCTGTAATCCCAGATACTCGGGAGGCTGAGGCAAGAGAATAGCTTGAACCCAGGAGGCGGAGGTTGCA  
GTGAGCCGAGATCGCACCACTGCACTCCAGCCTGGGCGACAGAGCCAGACTCCGTCTCAAAAAAGAAAAAAGA  
AAAA

>hsamiR566

GGGCGCCTGTGATCCCAAC

>GarnAlu1

GAAACCCCATCTCTACTAAAAATACAAAAATTAGCTAGGCGTGGTGGCGGGCGCCTGTGATCCCACTACTCAGG  
AGGCTGGGGCAGCAGAATCGCTTGAACCCGGGAGGCGAAGGTTGCAGTGAGCCAAGATCGCGCCATTGCACTCC  
AGCCTGGGTGACAGAGTGAGACTCCATCTCAAAAAACAAACAAACAAAAA

>TMEM146

GAAACCTATCTCTACTAAAAATAAAAAAATTAGCCGGGCGCAGTGGCGGGCGCCTGTAATCCCAGCTACTCGG  
GAGGCTGAGGCAGGAGAATGGCGTGAACCCGGGAGGCAGAGCTTGCAGTGAGCCAAGATCACACCGCTGCACT  
CCAGCCTGGGCGACAGAGCGAGACTCTGTCTCAAAAAAAAAAAAAAAAAAAAAA

>hsamiR566

GGGCGCCTGTGATCCCAAC

>GarnAlu1

GCTCATGCCTGTAATCCCAGCACTTTGGGAGGCTGAGACAGGTGGATCACGAGGTCAGGAGTTTCGAGACCAGCCT  
GACCAACATGGAGAAACCCCATCTCTACTAAAAATACAAAAATTAGCTAGGCGTGGTGGCGGGCGCCTGTGATCC  
CAACTACTCAGGAGGCTGGGGCAGCAGAATCGCTTGAACCCGGGAGGCGAAGGTTGCAGTGAGCCAAGATCGCG  
CCATTGCACTCCAGCCT

>ELP4

GCTCATGCCTGTAATTCCAGCACTTTGGGAGGCTGAGGCGGATGAATCACCTGAGGTCAGGAGTTTCGAGACCAGC  
CTGGCCAACATGGTGGAAACCCCATCTCTACTAAAAATACAAAAATTAGCTGGGTGTGGTGGTGGGCGCCTGTAAT  
CCCAGCTACTAGGGAGGCTGAGGCGGAGAATTGCTTGAACCCAGGAGGCGAGGTTGCCGTGAGCCGAGATCGT  
GCCACTGCACTCCAGCCT

>hsamiR566

GGGCGCCTGTGATCCCAAC

>GarnAlu1

AAAAATAAGCTGGGTGTGGTGGCTGACGCCTGTAATCCCAGCTAGTCAGGAGGCTGAGACAGGAGAATCGCTTG  
AACCCAG

>ELP4

AAAAATTAGCTGGGTGTGGTGGTGGGCGCCTGTAATCCCAGCTACTAGGGAGGCTGAGGCGGGAGAATTGCTTG  
AACCCAG

>hsamiR566

GGGCGCCTGTGATCCCAAC

>GarnAlu1

AAAAATTAGCTAGGCGTGGTGGCGGGCGCCTGTGATCCCACTACTCAGGAGGCTGGGGCAGCAGAATCGCTTG  
AACCCGGGAGGCGAAGGTTGCAGTGAGCCAAGATCGCGCCATTGCACTCCAGCCTGGGTGACAGAGTGAGACT

>SPATS2L

AAAAATTAGCTGGGCGTGGTGGTGGGCGCCTGTAATCCCAGCTACTCAGGAGGCTGAGGCAGGAGAATGGTGTG  
AACCTGGGAGGTGGAGCTTGCAGTGAGCAGAGATTGTGCCACTGCACTCCAGCCTGGGTGACAGGGTGAGACT

>hsamiR566

GGGCGCCTGTGATCCCAAC

>GarnAlu1

CAAAAAATAAGCTGGGTGTGGTGGCTGACGCCTGTAATCCCAGCTAGTCAGGAGGCTGAGACAGGAGAATCGCT  
TGAACCCAGCAGATGGAGGTTGCAGTGAGC

>SPATS2L

CAAAAAATTAGCTGGGCGTGGTGGTGGGCGCCTGTAATCCCAGCTACTCAGGAGGCTGAGGCAGGAGAATGGTG  
TGAACCTGGGAGGTGGAGCTTGCAGTGAGC

>hsamiR567

AGTATGTTCTTCCAGGACAGAAC

>CR1\_16\_HM\_CR1\_Hydra\_magnipapillata

CAGTATGTTCTTCCAGG

>HEATR7B1

CAGTATGTTCTTCCAGG

>hsamiR570\_5p

AAAGGTAATTGCAGTTTTTCCC

>MADE1

TTGCAGTTTTTCCCA

>ZC3H7A

TTGCAGTTTTTCCCA

>hsamiR574\_3p

CACGCTCATGCACACACCCACA

>hAT-N53\_DR

GGTCCACGCTCATGCAC

>CXCR7

GGTCCACGCTCATGCAC

>hsamiR574\_5p

TGAGTGTGTGTGTGTGAGTGTGT

>hAT-N53\_DR

GTGTGAGTGTGTGTGTGTGAGTGTGTGT

>FAM27D1.1

GTGTGTGTGTGTGTGTGTGAGTGTGTGT

>hsamiR574\_5p

TGAGTGTGTGTGTGTGAGTGTGT

>hAT-N53\_DR

GTGTGAGTGTGTGTGTGTGAGTGTGTGT

>FAM27D1.1

GTGTGTGTGTGTGTGTGTGAGTGTGTGTGTGTG

>hsamiR574\_5p

TGAGTGTGTGTGTGTGAGTGTGT

>hAT-N53\_DR

GTGTGAGTGTGTGTGTGTGAGTGTGTGT

>FAM27D1.1

GTGTGAGTGTGTGTGTGTGTCTGTGTGT

>hsamiR574\_5p  
TGAGTGTGTGTGTGTGAGTGTGT  
>hAT-N53\_DR  
TGAGTGTGTGTGTGTGAGTGTGTGT  
>AC096644.1  
TGAGTGTGTGTGTGTGTGTGTGTGT

>hsamiR574\_5p  
TGAGTGTGTGTGTGTGAGTGTGT  
>hAT-N53\_DR  
TGAGTGTGTGTGTGTGAGTGTGTGT  
>AC096644.1  
TGAGTGTGTGTGTGTGTGTGTGTGT

>hsamiR574\_5p  
TGAGTGTGTGTGTGTGAGTGTGT  
>hAT-N53\_DR  
GTGTGTGTGTGTGAGTGTGTGT  
>AC096644.1  
GTGTGTGTGTGTGTGTGTGTGT

>hsamiR574\_5p  
TGAGTGTGTGTGTGTGAGTGTGT  
>hAT-N53\_DR  
GTGTGAGTGTGTGTGTGTGAGTGTG  
>AC096644.1  
GTGTGTGTGTGTGTGTGTGTGTGTG

>hsamiR574\_5p  
TGAGTGTGTGTGTGTGAGTGTGT  
>hAT-N53\_DR  
GTGTGTGTGTGTGAGTGTGTG  
>AC096644.1  
GTGTGTGTGTGTGTGTGTGTGTG

>hsamiR574\_5p  
TGAGTGTGTGTGTGTGAGTGTGT  
>hAT-N53\_DR  
TGAGTGTGTGTGTGTGAGTGTGTGT  
>AC096644.1  
TGAGTGTGTGTGTGTGTGTGTGTGTGAG

>hsamiR574\_5p  
TGAGTGTGTGTGTGTGAGTGTGT  
>hAT-N53\_DR  
GTGTGTGTGTGTGAGTGTGTGT

>AC096644.1  
GTGTGTGTGTGTGTGTGTGTGTGAG

>hsamiR574\_5p  
TGAGTGTGTGTGTGTGAGTGTGT

>hAT-N53\_DR  
GTGTGAGTGTGTGTGTGTGAG  
>AC096644.1  
GTGTGTGTGTGTGTGTGTGTGAG

>hsamiR574\_5p  
TGAGTGTGTGTGTGTGAGTGTGT  
>hAT-N53\_DR  
GTGTGAGTGTGTGTGTGTGAGTGTG  
>AC096644.1  
GTGTGTGTGTGTGTGTGTGTGTGAG

>hsamiR574\_5p  
TGAGTGTGTGTGTGTGAGTGTGT  
>hAT-N53\_DR  
GTGTGTGTGTGTGAGTGTGTG  
>AC096644.1  
GTGTGTGTGTGTGTGTGTGTGAG

>hsamiR574\_5p  
TGAGTGTGTGTGTGTGAGTGTGT  
>hAT-N53\_DR  
TGAGTGTGTGTGTGTGAGTGTGTGT  
>AC096644.1  
TGAGTGTGTGTGTGTGTGTGTGTGTG

>hsamiR574\_5p  
TGAGTGTGTGTGTGTGAGTGTGT  
>hAT-N53\_DR  
GTGTGTGTGTGTGAGTGTGTGT  
>AC096644.1  
GTGTGTGTGTGTGTGTGTGTGTG

>hsamiR574\_5p  
TGAGTGTGTGTGTGTGAGTGTGT  
>hAT-N53\_DR  
GTGTGAGTGTGTGTGTGTGAGTGTGTGT  
>FGFRL1  
GTGTGAGAGTGTGTGTGTGTGTGTGTGT

>hsamiR574\_5p  
TGAGTGTGTGTGTGTGAGTGTGT  
>hAT-N53\_DR

GAGTGTGTGTGTGTGAGTGTGTG

>FGFRL1

GAGTGTGTGTGTGTGTGTGTGTG

>hsamiR574\_5p

TGAGTGTGTGTGTGTGAGTGTGT

>hAT-N53\_DR

CGTGTGAGTGTGTGTGTGTGAGTGTGTGT

>FGFRL1

CGTGTGAGTGTGTGTGAGAGTGTGTGTGTGTGTGTGTGT

>hsamiR574\_5p

TGAGTGTGTGTGTGTGAGTGTGT

>hAT-N53\_DR

GTGTGAGTGTGTGTGTGTGAGTGTGTGT

>FGFRL1

GTGTGAGAGTGTGTGTGTGTGTGTGTGTGTG

>hsamiR574\_5p

TGAGTGTGTGTGTGTGAGTGTGT

>hAT-N53\_DR

CGTGTGAGTGTGTGTGTGTGAGTGTGTGT

>FGFRL1

CGTGTGAGTGTGTGTGAGAGTGTGTGTGTGTGTGTGTGTG

>hsamiR574\_5p

TGAGTGTGTGTGTGTGAGTGTGT

>hAT-N53\_DR

CGTGTGAGTGTGTGTGTGTGAGTGTGTGT

>FGFRL1

CGTGTGAGTGTGTGTGAGAGTGTGTGTGTGTGTGTGTGT

>hsamiR574\_5p

TGAGTGTGTGTGTGTGAGTGTGT

>hAT-N53\_DR

CGTGTGAGTGTGTGTGTGTGAGTGTGTGT

>FGFRL1

CGTGTGAGTGTGTGTGAGAGTGTGTGTGTGTGTGTGTGT

>hsamiR574\_5p

TGAGTGTGTGTGTGTGAGTGTGT

>hAT-N53\_DR

TGTGTGTGTGTGAGTGTGTGT

>ITPK1

TGTGTGTGTGTGTGTGTGTGT

>hsamiR574\_5p

TGAGTGTGTGTGTGTGAGTGTGT

>hAT-N53\_DR  
GTGTGAGTGTGTGTGTGAGTGTGTGT  
>CR547129.1  
GTGTGTGTGTGTGTGTGTGTGTGTGTGT

>hsamiR574\_5p  
TGAGTGTGTGTGTGTGAGTGTGT  
>hAT-N53\_DR  
GTGTGAGTGTGTGTGTGTGAGTGTGTGT  
>CR547129.1  
GTGTGTGTGTGTGTGTGTGTGTGTGTGT

>hsamiR574\_5p  
TGAGTGTGTGTGTGTGAGTGTGT  
>hAT-N53\_DR  
GTGTGAGTGTGTGTGTGTGAGTGTGTG  
>CR547129.1  
GTGTGTGTGTGTGTGTGTGTGTGTGTG

>hsamiR574\_5p

TGAGTGTGTGTGTGTGAGTGTGT  
>hAT-N53\_DR  
TGTGAGTGTGTGTGTGTGAGTGTGTGT  
>CR547129.1  
TGTGTGTGTGTGTGTGTGTGTGTGTGTGTGTGTGTGTGTGTGTGT

>hsamiR574\_5p  
TGAGTGTGTGTGTGTGAGTGTGT  
>hAT-N53\_DR  
TGTGAGTGTGTGTGTGTGAGTGTGTGT  
>CR547129.1  
TGTGTGTGTGTGTGTGTGTGTGTGTGTGTGTGTGTGTGTGTGTGT

>hsamiR574\_5p  
TGAGTGTGTGTGTGTGAGTGTGT  
>hAT-N53\_DR  
TGTGAGTGTGTGTGTGTGAGTGTGTGT  
>CR547129.1  
TGTGTGTGTGTGTGTGTGTGTGTGTGTGTGTGTGTGTGTGTGTGT

>hsamiR574\_5p  
TGAGTGTGTGTGTGTGAGTGTGT  
>hAT-N53\_DR  
TGTGAGTGTGTGTGTGTGAGTGTGTGT  
>CR547129.1  
TGTGTGTGTGTGTGTGTGTGTGTGTGTGTGTGTGTGTGTGTGTGT

>hsamiR574\_5p  
TGAGTGTGTGTGTGTGAGTGTGT  
>hAT-N53\_DR  
TGTGAGTGTGTGTGTGTGAGTGTGTGT  
>CR547129.1  
TGTGTGTGTGTGTGTGTGTGTGTGTGTGTGTGTGTGTGTGTGTGT

>hsamiR574\_5p  
TGAGTGTGTGTGTGTGAGTGTGT  
>hAT-N53\_DR  
TGTGAGTGTGTGTGTGTGAGTGTGTGT  
>CR547129.1  
TGTGTGTGTGTGTGTGTGTGTGTGTGTGTGTGTGTGTGTGTGTGT

>hsamiR574\_5p  
TGAGTGTGTGTGTGTGAGTGTGT  
>hAT-N53\_DR  
TGTGAGTGTGTGTGTGTGAGTGTGTGT  
>CR547129.1  
TGTGTGTGTGTGTGTGTGTGTGTGTGTGTGTGTGTGTGTGTGTGT



>hsamiR574\_5p  
TGAGTGTGTGTGTGTGAGTGTGT  
>hAT-N53\_DR  
GTGTGAGTGTGTGTGTGTGAGTGTGTGT  
>CR547129.1  
GTGTGTGTGTGTGTGTGTGTGTGTGTGTGTGTG

>hsamiR574\_5p  
TGAGTGTGTGTGTGTGAGTGTGT  
>hAT-N53\_DR  
TGTGAGTGTGTGTGTGTGAGTGTGTGT  
>CR547129.1  
TGTGTGTGTGTGTGTGTGTGTGTGTGTGTGTGTG

>hsamiR574\_5p  
TGAGTGTGTGTGTGTGAGTGTGT  
>hAT-N53\_DR  
GTGTGAGTGTGTGTGTGTGAGTGTGTGT  
>CR547129.1  
GTGTGTGTGTGTGTGTGTGTGTGTGTGTGA

>hsamiR574\_5p  
TGAGTGTGTGTGTGTGAGTGTGT  
>hAT-N53\_DR  
GTGTGAGTGTGTGTGTGTGAGTGTGTG  
>CR547129.1  
GTGTGTGTGTGTGTGTGTGTGTGTGTGA

>hsamiR574\_5p  
TGAGTGTGTGTGTGTGAGTGTGT  
>hAT-N53\_DR  
GTGTGAGTGTGTGTGTGTGAGTGTGTG  
>AL844527.3  
GTGTGTGTGTGTGTGTGTGTGTGTGTG

>hsamiR574\_5p  
TGAGTGTGTGTGTGTGAGTGTGT  
>hAT-N53\_DR  
TGTGAGTGTGTGTGTGTGAGTGTGTGT  
>AL844527.3  
TGTGTGTGTGTGTGTGTGTGTGTGTGT

>hsamiR574\_5p  
TGAGTGTGTGTGTGTGAGTGTGT  
>hAT-N53\_DR  
TGTGAGTGTGTGTGTGTGAGTGTGTGT  
>AL844527.3  
TGTGTGTGTGTGTGTGTGTGTGTGTGTG

>hsamiR574\_5p  
TGAGTGTGTGTGTGTGAGTGTGT  
>hAT-N53\_DR  
GTGTGAGTGTGTGTGTGTGAGTGTGTG  
>AL844527.3  
GTGTGTGTGTGTGTGTGTGTGTGTGTGA

>hsamiR574\_5p  
TGAGTGTGTGTGTGTGAGTGTGT  
>hAT-N53\_DR  
TGTGAGTGTGTGTGTGTGAGTGTGTGT  
>AL844527.3  
TGTGTGTGTGTGTGTGTGTGTGTGTGA

>hsamiR574\_5p  
TGAGTGTGTGTGTGTGAGTGTGT  
>hAT-N53\_DR  
GTGTGAGTGTGTGTGTGTGAGTGTGTGT  
>ST8SIA3  
GTGTGTGTGTGTGTGTGTGTGTGTGTGT

>hsamiR574\_5p  
TGAGTGTGTGTGTGTGAGTGTGT  
>hAT-N53\_DR  
GTGTGAGTGTGTGTGTGTGAGTGTGTGT  
>ST8SIA3  
GTGTGTGTGTGTGTGTGTGTGTGTGTGT

>hsamiR574\_5p  
TGAGTGTGTGTGTGTGAGTGTGT  
>hAT-N53\_DR  
GTGTGAGTGTGTGTGTGTGAGTGTGTGT  
>ST8SIA3  
GTGTGTGTGTGTGTGTGTGTGTGTGTGTGTGT

>hsamiR574\_5p  
TGAGTGTGTGTGTGTGAGTGTGT  
>hAT-N53\_DR  
GTGTGAGTGTGTGTGTGTGAGTGTGTGT  
>ST8SIA3  
GTGTGTGTGTGTGTGTGTGTGTGTGTGTGTGT

>hsamiR574\_5p  
TGAGTGTGTGTGTGTGAGTGTGT  
>hAT-N53\_DR  
GTGTGAGTGTGTGTGTGTGAGTGTGTGT  
>ST8SIA3  
GTGTGTGTGTGTGTGTGTGTGTGTGTGTGTGT

>hsamiR574\_5p  
TGAGTGTGTGTGTGTGAGTGTGT  
>hAT-N53\_DR  
GTGTGAGTGTGTGTGTGTGAGTGTGTG  
>ST8SIA3  
GTGTGTGTGTGTGTGTGTGTGTGTGTGTG

>hsamiR574\_5p  
TGAGTGTGTGTGTGTGAGTGTGT  
>hAT-N53\_DR  
TGTGAGTGTGTGTGTGTGAGTGTGTGT  
>ST8SIA3  
TGTGTGTGTGTGTGTGTGTGTGTGTGTGTGTGT

>hsamiR574\_5p  
TGAGTGTGTGTGTGTGAGTGTGT  
>hAT-N53\_DR  
TGTGAGTGTGTGTGTGTGAGTGTGTGT  
>ST8SIA3  
TGTGTGTGTGTGTGTGTGTGTGTGTGTGTGTGT

>hsamiR574\_5p  
TGAGTGTGTGTGTGTGAGTGTGT  
>hAT-N53\_DR  
TGTGAGTGTGTGTGTGTGAGTGTGTGT  
>ST8SIA3  
TGTGTGTGTGTGTGTGTGTGTGTGTGTGTGTGT

>hsamiR574\_5p  
TGAGTGTGTGTGTGTGAGTGTGT  
>hAT-N53\_DR  
TGTGAGTGTGTGTGTGTGAGTGTGTGT  
>ST8SIA3  
TGTGTGTGTGTGTGTGTGTGTGTGTGTGTGT

>hsamiR574\_5p  
TGAGTGTGTGTGTGTGAGTGTGT  
>hAT-N53\_DR  
TGTGAGTGTGTGTGTGTGAGTGTGTGT  
>ST8SIA3  
TGTGTGTGTGTGTGTGTGTGTGTGTGTGTGT

>hsamiR574\_5p  
TGAGTGTGTGTGTGTGAGTGTGT  
>hAT-N53\_DR  
TGTGAGTGTGTGTGTGTGAGTGTGTGT  
>ST8SIA3  
TGTGTGTGTGTGTGTGTGTGTGTGTGTGTGT

>hsamiR574\_5p  
TGAGTGTGTGTGTGTGAGTGTGT  
>hAT-N53\_DR  
GTGTGAGTGTGTGTGTGTGAGTGTGTGT  
>ST8SIA3  
GTGTGTGTGTGTGTGTGTGTGTGTGTGTGTG



>hsamiR574\_5p  
TGAGTGTGTGTGTGAGTGTGT  
>hAT-N53\_DR  
TGTGTGTGTGTGAGTGTGTGT  
>GNE  
TGTGTGTGTGTGTGTGTGTGTGT

>hsamiR574\_5p  
TGAGTGTGTGTGTGAGTGTGT  
>hAT-N53\_DR  
TGTGTGTGTGTGAGTGTGTGT  
>GNE  
TGTGTGTGTGTGTGTGTGTGTGT

>hsamiR574\_5p  
TGAGTGTGTGTGTGAGTGTGT  
>hAT-N53\_DR  
TGTGTGTGTGTGAGTGTGTGT  
>GNE  
TGTGTGTGTGTGTGTGTGTGTGT

>hsamiR574\_5p  
TGAGTGTGTGTGTGAGTGTGT  
>hAT-N53\_DR  
GTGTGTGTGTGTGAGTGTGTGT  
>GNE  
GTGTGTGTGTGTGTGTGTGTGTG

>hsamiR574\_5p  
TGAGTGTGTGTGTGAGTGTGT  
>hAT-N53\_DR  
GTGTGTGTGTGTGAGTGTGTGT  
>GNE  
GTGTGTGTGTGTGTGTGTGTGTG

>hsamiR574\_5p  
TGAGTGTGTGTGTGAGTGTGT  
>hAT-N53\_DR  
TGTGTGTGTGTGAGTGTGTGT  
>GNE  
TGTGTGTGTGTGTGTGTGTGTGTG

>hsamiR574\_5p  
TGAGTGTGTGTGTGAGTGTGT  
>hAT-N53\_DR  
CGTGTGAGTGTGTGTGTGAGTGTGTGT  
>C10orf71  
CGTGTGTGTGTGTGTGTGTGTGTGTGTGTGTGTGTGTGTGTGTGTGTGT

>hsamiR574\_5p  
TGAGTGTGTGTGTGTGAGTGTGT  
>hAT-N53\_DR  
GTGTGAGTGTGTGTGTGTGAGTGTGTGT  
>C10orf71  
GTGTGTGTGTGTGTGTGTGTGTGTGTGTGT

>hsamiR574\_5p  
TGAGTGTGTGTGTGTGAGTGTGT  
>hAT-N53\_DR  
CGTGTGAGTGTGTGTGTGTGAGTGTGTGT  
>C10orf71  
CGTGTGTGTGTGTGTGTGTGTGTGTGTGTGT

>hsamiR574\_5p  
TGAGTGTGTGTGTGTGAGTGTGT  
>hAT-N53\_DR  
CGTGTGAGTGTGTGTGTGTGAGTGTGTGT  
>C10orf71  
CGTGTGTGTGTGTGTGTGTGTGTGTGTGTGT



>hsamiR574\_5p  
TGAGTGTGTGTGTGTGAGTGTGT  
>hAT-N53\_DR  
CGTGTGAGTGTGTGTGTGTGAGTGTGTGT  
>C10orf71  
CGTGTGTGTGTGTGTGTGTGTGTGTGTGTGTGT

>hsamiR574\_5p  
TGAGTGTGTGTGTGTGAGTGTGT  
>hAT-N53\_DR  
CGTGTGAGTGTGTGTGTGTGAGTGTGTGT  
>C10orf71  
CGTGTGTGTGTGTGTGTGTGTGTGTGTGTGTGT

>hsamiR574\_5p  
TGAGTGTGTGTGTGTGAGTGTGT  
>hAT-N53\_DR  
CGTGTGAGTGTGTGTGTGTGAGTGTGTGT  
>C10orf71  
CGTGTGTGTGTGTGTGTGTGTGTGTGTGTGTGT

>hsamiR574\_5p  
TGAGTGTGTGTGTGTGAGTGTGT  
>hAT-N53\_DR  
GTGTGAGTGTGTGTGTGTGAGTGTGTGT  
>FAM27D1.1  
GTGTGTGTGTGTGTGTGTGAGTGTGTGTGTGTCTGTGTGTGTGT

>hsamiR574\_5p  
TGAGTGTGTGTGTGTGAGTGTGT  
>hAT-N53\_DR  
GTGTGAGTGTGTGTGTGTGAGTGTGTGT  
>FAM27D1.1  
GTGTGAGTGTGTGTGTGTGTCTGTGTGTGTGT

>hsamiR574\_5p  
TGAGTGTGTGTGTGTGAGTGTGT  
>hAT-N53\_DR  
TGTGTGTGTGTGAGTGTGTGT  
>COBL  
TGTGTGTGTGTGCGTGTGTGT

>hsamiR582\_3p  
TAACTGGTTGAACAACCTGAACC  
>L3  
AACTGGTTGAACAACCTGAACCCAAAGGGTGCAAAGTA  
>UBA2  
AACTGGTTGAACAAGTACTTTGCCCAAACGATGCAATGTA

>hsamiR598  
TACGTCATCGTTGTCATCGTCA  
>CACTA\_LP  
CGTTGTCATCGTCATCATCATC  
>ACRC  
CGTTGTCATCGTCATTGTCATCATC

>hsamir601  
TGGTCTAGGATTGTTGGAGGAG  
>LTR96\_MD  
ATTGTTGGAGGAGTCAG  
>RUNX1T1  
ATTGTTGGAGGAGTCAG

>hsamiR645  
TCTAGGCTGGTACTGCTGA  
>CHARLIE3  
GCTGGTACTGCTGATGCT  
>C1orf189  
GCTGGTACTGCTGATGCT

>hsamir7\_5p  
TGGAAGACTAGTGATTTTGTGT  
>L2\_1b\_Cis\_CR1\_Ciona\_savignyi  
AAGACTAGTGATTTT  
>MYBL1  
AAGACTAGTGATTTT

>hsamir7\_5p  
TGGAAGACTAGTGATTTTGTGT  
>L2\_1b\_Cis\_CR1\_Ciona\_savignyi  
ACTAGTGATTTTGT  
>DEFB113  
ACTAGTGATTTTGT

>hsamiR762  
GGGGCTGGGGCCGGGGCCGAGC  
>NonLTR\_5\_CR\_Non\_LTR\_Retrotransposon\_Chlamydomonas\_reinhardtii  
CGGGGCTGGGGCCGGGGCCG  
>CDKN1C  
CGGGGCTGGGGCCGGGGCCG

>hsamiR762  
GGGGCTGGGGCCGGGGCCGAGC  
>NonLTR\_5\_CR\_Non\_LTR\_Retrotransposon\_Chlamydomonas\_reinhardtii  
CGGGGCTGGGGCCGGGGCCG  
>CDKN1C  
CGGGGCTGGGGCCGGGGCCGCGACTGGAGCCGGGG

>hsamiR762  
GGGGCTGGGGCCGGGGCCGAGC  
>NonLTR\_5\_CR\_Non\_LTR\_Retrotransposon\_Chlamydomonas\_reinhardtii  
CGGGGCTGGGGCCGGGGCCG  
>CDKN1C  
CGGGGCTGGGGCCGGGGCCGCGACTGGAG

>hsamiR762  
GGGGCTGGGGCCGGGGCCGAGC  
>NonLTR\_5\_CR\_Non\_LTR\_Retrotransposon\_Chlamydomonas\_reinhardtii  
CGGGGCTGGGGCCGGGGCCG  
>CDKN1C  
CGGGGCTGGGGCCGGGGCCGCGA

>hsamiR762  
GGGGCTGGGGCCGGGGCCGAGC  
>NonLTR\_5\_CR\_Non\_LTR\_Retrotransposon\_Chlamydomonas\_reinhardtii  
CGGGGCTGGGGCCGGGGCCG  
>TBC1D10B  
CGGGGCTGGGGCCGGGGCCG

>hsamiR762  
GGGGCTGGGGCCGGGGCCGAGC  
>NonLTR\_5\_CR\_Non\_LTR\_Retrotransposon\_Chlamydomonas\_reinhardtii  
CGGGGCTGGGGCCGGGGCC  
>TBC1D10B  
CGGGGCTGGGGCCGGGGCTGGGGCCGGGGCCG

>hsamiR762  
GGGGCTGGGGCCGGGGCCGAGC  
>NonLTR\_5\_CR\_Non\_LTR\_Retrotransposon\_Chlamydomonas\_reinhardtii  
CGGGGCTGGGGCCGGGGCC  
>TBC1D10B  
CGGGGCTGGGGCCGGGGCC

>hsamiR762  
GGGGCTGGGGCCGGGGCCGAGC  
>NonLTR\_5\_CR\_Non\_LTR\_Retrotransposon\_Chlamydomonas\_reinhardtii  
CGGGGCTGGGGCCGGGGCC  
>STARD8  
CGGGGCTGGGGCCGGGGCC

>hsamiR762  
GGGGCTGGGGCCGGGGCCGAGC  
>NonLTR\_5\_CR\_Non\_LTR\_Retrotransposon\_Chlamydomonas\_reinhardtii  
GGGCTGGGGCCGGGGCCG  
>STARD8  
GGGCTGGGGCCGGGGCCGGGGCTGGGGCCGGGGCC

>hsamiR762  
GGGGCTGGGGCCGGGGCCGAGC  
>NonLTR\_5\_CR\_Non\_LTR\_Retrotransposon\_Chlamydomonas\_reinhardtii  
GGGCTGGGGCCGGGGCCG  
>STARD8  
GGGCTGGGGCCGGGGCCG

>hsamiR762  
GGGGCTGGGGCCGGGGCCGAGC  
>NonLTR\_5\_CR\_Non\_LTR\_Retrotransposon\_Chlamydomonas\_reinhardtii  
GGGCTGGGGCCGGGGCCG  
>STARD8  
GGGCTGGGGCCGGGGCCGGGGC

>hsamiR762  
GGGGCTGGGGCCGGGGCCGAGC  
>NonLTR\_5\_CR\_Non\_LTR\_Retrotransposon\_Chlamydomonas\_reinhardtii  
CGGGGCTGGGGCCGGGGCC  
>AEBP1  
CGGGGCTGGGGCCGGGGCC

>hsamiR762  
GGGGCTGGGGCCGGGGCCGAGC  
>NonLTR\_5\_CR\_Non\_LTR\_Retrotransposon\_Chlamydomonas\_reinhardtii  
CGGGGCTGGGGCCGGGGCCGAGCCCCG  
>PAPD5  
CGGGGCCGGGGCCGGGGCCGAGGCCGCG

>hsamiR762  
GGGGCTGGGGCCGGGGCCGAGC  
>NonLTR\_5\_CR\_Non\_LTR\_Retrotransposon\_Chlamydomonas\_reinhardtii  
CGGGGCTGGGGCCGGGGCCGAGCCCC  
>TAF4  
CGGGGCCGGGGCCGGGGCCGGGGCCCG

>hsamiR762  
GGGGCTGGGGCCGGGGCCGAGC  
>NonLTR\_5\_CR\_Non\_LTR\_Retrotransposon\_Chlamydomonas\_reinhardtii  
CGGGGCTGGGGCCGGGGCCGAGCCCC  
>TAF4  
CGGGGCCGGGGCCGGGGCCGGGGCCGGGGCCCG

>hsamiR762  
GGGGCTGGGGCCGGGGCCGAGC  
>NonLTR\_5\_CR\_Non\_LTR\_Retrotransposon\_Chlamydomonas\_reinhardtii  
CGGGGCTGGGGCCGGGGCCGAGCCCCG  
>STK39  
CGGGGCCGGGGCCGGGGCCGGGGCCCGCG

>hsamiR1255b2\_3p  
AACCACTTTCTTTGCTCATCCA  
>TIGGER1  
AAACCACTTTCTTTGCTCATCCGTAAGAAGCAACTCCT  
>TIGD1  
AAACCACTTTCTTTGCGCATCCATAAGAAACAACCTCCT

>hsamiR1285\_3p  
TCTGGGCAACAAAGTGAGACCT  
>AluJ  
GCCTGTAGTCCCAACTACTTGGGAGGCTGAGGCAGGAGGACTGCCTGAGCCTAGGAGTTTGCAGCTGCACTGAGC  
TATGATGGTGCCGCTGCACTCCAGCCTGGGCAAAAGAGTGAGAC  
>NOS3  
GCCTGTAGTCCCAACTACTTGGGAGGTTGAAGTGGGAGGATTGCTTGAGTCTAGGAGGTTGAGGCTGCAGTGAG  
CCGTGATTGTACTACTGCACTCCAGCCTGGGCCACAAAGTGAGACC

>hsamiR1285\_3p  
TCTGGGCAACAAAGTGAGACCT  
>AluJ  
CCAGCCTGGGCAACAAAGTGAGA  
>NOS3  
CCAGCCTGGGCCACAAAGTGAGACC

>hsamiR1285\_3p  
TCTGGGCAACAAAGTGAGACCT  
>AluJ  
AGACCAGCCTGGGCAACAAAGTGAGATCCTATCTCTACAAATAATAAAAAAATTAGCTGGGTGTGGTGCCAT  
>AC105020.1  
AGACCAGCCTGGGCAACATAGTGAGACCCTGTCTCAACAAACAATAAAAAAATAGCTGGGTGTGGTGCCAT

>hsamiR1285\_3p  
TCTGGGCAACAAAGTGAGACCT  
>AluJ  
GTGCCGCTGCACTCCAGCCTGGGCAAAAGAGTGAGACT  
>ZNF410  
GTGCCACTGCACTCCAGCCTGGGCAACAGAGTGAGACT

>hsamiR1285\_3p  
TCTGGGCAACAAAGTGAGACCT  
>AluJ  
CCAGCCTGGGCAACAAAGTGAGA  
>ZNF410  
CCAGCCTGGGCAACAGAGTGAGAC

>hsamiR1285\_3p  
TCTGGGCAACAAAGTGAGACCT  
>AluJ

GCTGGGTGTGGTGGCATATGCCTGTAGTCCCACTACTTGGGAGGCTGAGGCAGGAGGACTGCCTGAGCCTAGG  
AGTTTGCACTGCACTGAGCTATGATGGTGCCGCTGCACTCCAGCCTGGGCAAAAGAGTGAGACT

>C11orf67

GCTGGGTGTGGTGGCAGGCACCTGTAGTCCCAGCTACTTGGGAGGCTGAGGCAGGAGAATGGCATGAACCTGGG  
AGGTGGAGGTTGCAGTGAGCCGAGATCGCGCCACTGCACTCCAGCCTGGGCAACAGAGTGAGACT

>hsamiR1285\_3p

TCTGGGCAACAAAGTGAGACCT

>AluJ

CCAGCCTGGGCAACAAAGTGAGA

>C11orf67

CCAGCCTGGGCAACAGAGTGAGAC

>hsamiR1285\_3p

TCTGGGCAACAAAGTGAGACCT

>AluJ

CCAGGAGTTTGAGACCAGCCTGGGCAACAAAGTGAGATCCTATCTCT

>ABCG5

CCAGGAGTTTGAGACCAGCTTGGGCAACAAAGAGAGACCCTGTCTCT

>hsamiR1285\_3p

TCTGGGCAACAAAGTGAGACCT

>AluJ

CTGCACTCCAGCCTGGGCAAAAGAGTGAGACT

>NEK4

CTGCACTCCAGCCTGGGCAACAGAGTGAGACT

>hsamiR1285\_3p

TCTGGGCAACAAAGTGAGACCT

>AluJ

CCAGCCTGGGCAACAAAGTGAGA

>NEK4

CCAGCCTGGGCAACAGAGTGAGAC

>hsamiR1285\_3p

TCTGGGCAACAAAGTGAGACCT

>AluJ

CCAGGAGTTTGAGACCAGCCTGGGCAACAAAGTGAGA

>C3orf65

CCAGGAATTTGAGACCAGCCTGGGCAACATAGTGAGAC

>hsamiR1285\_3p

TCTGGGCAACAAAGTGAGACCT

>AluJ

GCCGCTGCACTCCAGCCTGGGCAAAAGAGTGAGACT

>RHBG

GCCGTTGCACTCCAGCCTGGGCAACAGAGTGAGACT

>hsamiR1285\_3p  
TCTGGGCAACAAAGTGAGACCT  
>AluJ  
CCAGCCTGGGCAACAAAGTGAGA  
>RHBG  
CCAGCCTGGGCAACAGAGTGAGAC

>hsamiR1285\_3p  
TCTGGGCAACAAAGTGAGACCT  
>AluJ  
AGCCTGGGCAACAAAGTGAGA  
>SUMO3  
AGCCTGGGCAACAAAGCGAGAC

>hsamiR1285\_3p  
TCTGGGCAACAAAGTGAGACCT  
>AluJ  
CTGCACTCCAGCCTGGGCAA  
>AC005082.1  
CTGCACTCCAGCCTGGGCAACAAAGCGAGAC

>hsamiR1285\_3p  
TCTGGGCAACAAAGTGAGACCT  
>AluJ  
CCAGCCTGGGCAACAAAGTGAGA  
>AC005082.1  
CCAGCCTGGGCAACAAAGCGAGAC

>hsamiR1285\_3p  
TCTGGGCAACAAAGTGAGACCT  
>AluJ  
GCACTCCAGCCTGGGCAAAAGAGTGAGACTGTGTCCCAAGGAAAAAAAAAAAA  
>AC074378.3  
GCACTCCAGCCTGGGAAACAAAGTGAGATTTCAGTCTCAAAAAAAAAAAAAAAAA

>hsamiR1285\_3p  
TCTGGGCAACAAAGTGAGACCT  
>AluJ  
CCAGCCTGGGCAACAAAGTGAGAT  
>AC074378.3  
CCAGCCTGGGAAACAAAGTGAGAT

>hsamiR1285\_3p  
TCTGGGCAACAAAGTGAGACCT  
>AluJ  
GTGCCGCTGCACTCCAGCCTGGGCAAAAGAGTGAGA  
>IFT81  
GTGCCACTGCACTCCAGCCTGGGCAACAGAGTGAGA

>hsamiR1285\_3p  
TCTGGGCAACAAAGTGAGACCT  
>AluJ  
CCAGCCTGGGCAACAAAGTGAGAT  
>IFT81  
CCAGCCTGGGCAACAGAGTGAGAT

>hsamiR1285\_3p  
TCTGGGCAACAAAGTGAGACCT  
>AluJ  
CCAGCCTGGGCAACAAAG  
>AC138688.4  
CCAGCCTGGGCAACAAAG

>hsamiR1285\_3p  
TCTGGGCAACAAAGTGAGACCT  
>AluJ  
GATGGTGCCGCTGCACTCCAGCCTGGGCAAAAGAGTGAG  
>U2AF1L4  
GATGGTGCCAATGCACTCCAGCCTGGGCAACAGAGTGAG

>hsamiR1285\_3p  
TCTGGGCAACAAAGTGAGACCT  
>AluJ  
CCAGCCTGGGCAACAAAGTGAG  
>U2AF1L4  
CCAGCCTGGGCAACAGAGTGAG

>hsamiR1285\_3p  
TCTGGGCAACAAAGTGAGACCT  
>AluJ  
CCAGCCTGGGCAACAAAG  
>AL365202.1  
CCAGCCTGGGCAACAAAG

>hsamiR1304\_5p  
TTTGAGGCTACAGTGAGATGTG  
>ALU\_SINE1\_7SL\_Primates  
CTTGAGCCCAGGGGTTTCGAGGCTACAGTGAG  
>GNPTAB  
CTTGAGCCCACGAGGTCGAGGCTACAGTGAG

>hsamiR3171  
AGATGTATGGAATCTGTATATATC  
>MuDR\_1\_NV\_MuDR\_Nematostella\_vectensis  
TATATAGATTTATGGAATCTATAT  
>XPO1  
TATACAAATTTATGGAATCTGTAT



>hsamiR3171  
AGATGTATGGAATCTGTATATATC  
>MuDR\_1\_NV\_MuDR\_Nematostella\_vectensis  
CACATACATATATAGATTTATGGAATCTATAT  
>XPO1  
CATATTCTTATACAAATTTATGGAATCTGTAT
